# Supplementary material for: Nitronate-aryne cycloaddition as a concise route to stereochemically complex fused benzisoxazolines and amino alcohols
Source: Royal Society of Chemistry journal article supplement (doi:10.1039/d3ob00235g), 2023-01-01

## SUPPORTING INFORMATION

### Nitronate-aryne cycloaddition as a concise route to stereochemically complex fused benzoxazolines and amino alcohols

Alexander A. Lukoyanov,<sup>a</sup> Andrey A. Tabolin,<sup>a,\*</sup> Yulia V. Nelyubina,<sup>b</sup> Svetlana A. Aksenova,<sup>b,c</sup>  
Alexey Yu. Sukhorukov<sup>a,\*</sup>

<sup>a</sup> N. D. Zelinsky Institute of Organic Chemistry, Russian Academy of Sciences, 119991, Leninsky  
prospect, 47, Moscow, Russian Federation

<sup>b</sup> A. N. Nesmeyanov Institute of Organoelement Compounds, 119991, Vavilov str. 28, Moscow,  
Russian Federation

<sup>c</sup> Moscow Institute of Physics and Technology (National Research University), 141700,  
Institutskiy per. 9, Dolgoprudny, Moscow Region, Russian Federation

\* Corresponding authors: [tabolin87@mail.ru](mailto:tabolin87@mail.ru) (A.A.T), [atabolin@ioc.ac.ru](mailto:atabolin@ioc.ac.ru) (A.A.T),  
[sukhorukov@ioc.ac.ru](mailto:sukhorukov@ioc.ac.ru) (A.Y.S)

## Table of contents

|                                                                                                                                                  |     |
|--------------------------------------------------------------------------------------------------------------------------------------------------|-----|
| General experimental                                                                                                                             | S3  |
| Structures, synthesis and characterization data of cyclic nitronates <b>1</b> , <b>2</b> , nitroalkenes <b>3</b> , and aryne precursors <b>9</b> | S3  |
| Synthesis and characterization data of nitroso acetals <b>5</b> and <b>6</b>                                                                     | S13 |
| Hydrogenation of nitroso acetals <b>5</b> and <b>6</b>                                                                                           | S31 |
| Acid-mediated transformations of nitroso acetals <b>5</b> and <b>6</b>                                                                           | S35 |
| Elucidation of structure and relative stereochemistry of products <b>5</b> and <b>6</b>                                                          | S38 |
| X-ray crystallography                                                                                                                            | S40 |
| DFT calculations                                                                                                                                 | S45 |
| References                                                                                                                                       | S76 |
| Copies of NMR spectra                                                                                                                            | S78 |

## General experimental

All reactions were performed in oven-dried (150 °C) glassware. Most of the chemicals were acquired from commercial sources and used as received. Petroleum ether (PE), ethyl acetate, and *tert*-butyl methyl ether (MTBE) were distilled. CH<sub>3</sub>CN and CH<sub>2</sub>Cl<sub>2</sub> were distilled from CaH<sub>2</sub> prior to use. Triethylamine, DBU and DMF were distilled from CaH<sub>2</sub>. Brine refers to saturated aqueous solution of NaCl. TLC were performed on silica coated on aluminium with UV254 indicator. Visualization was accomplished with UV and/or anisaldehyde/H<sub>2</sub>SO<sub>4</sub>/EtOH stain and/or ninhydrin/EtOH stain. Column chromatography was performed on silica (0.04–0.063 mm, 60 Å). NMR spectra were recorded at 300K on Bruker AM300, Fourier 300HD and Avance NEO spectrometers at the following spectrometer frequencies: 300 MHz (<sup>1</sup>H NMR), 75 MHz (<sup>13</sup>C NMR), 282 MHz (<sup>19</sup>F NMR). Multiplicities are assigned as s (singlet), d (doublet), t (triplet), q (quartet), quint (quintet), m (multiplet), br (broad), app (apparent). Assignment was made using 2D NMR spectra for selected products. For other products signals were assigned by analogy. High resolution mass spectra were acquired on Bruker micrOTOF spectrometer using electrospray ionization (ESI). GC-MS was performed on a Chromatec 5000 with Agilent DB-1MS column 122-0132. Melting points were determined on a Koffler melting point apparatus and are uncorrected.

## Structures, synthesis and characterization data of cyclic nitronates **1**, **2**, nitroalkenes **3**, and aryne precursors **9**

Model cyclic nitronates **1** and **2** were synthesized starting from readily available  $\alpha$ -substituted nitroalkenes **3** by known methods (Scheme S1). Six-membered cyclic nitronates **1a–m** were assembled using a SnCl<sub>4</sub>-promoted inverse-electron demand [4+2]-cycloaddition of nitroalkenes **3** with electron-rich olefins (Scheme S1, a). The synthesis of isoxazoline *N*-oxide 5,5-dicarboxylates **2a–e** was accomplished by condensation of nitroalkenes **3** with diethyl bromomalonate (Scheme S1, b). Isoxazoline *N*-oxides **2f–i** were prepared by [4+1]-annulation of nitroalkenes **3** with sulfur ylides **11** (Corey-Chaykovsky reagent **11a**, ester- and benzyl-stabilized ylides **11b** and **11c**, Scheme S1, c). All products are racemates.

5,6-Dihydro-4*H*-1,2-oxazine *N*-oxides **1a**,<sup>1</sup> **1b**,<sup>2</sup> **1e**,<sup>3</sup> **1f**,<sup>2</sup> and **1m**<sup>4</sup> were prepared from corresponding nitroalkenes **3a**, **3b**, **3e**, **3f**, and **3i** following the previously described procedures.

Isoxazoline *N*-oxides **2b**,<sup>2</sup> **2g**,<sup>2</sup> **2h**,<sup>2</sup> and **2i**<sup>5</sup> were prepared from corresponding nitroalkenes **3j**, **3a**, **3d**, and **3a** following the previously described procedures.

Nitroalkenes **3a**,<sup>6</sup> **3b**,<sup>7</sup> **3c**,<sup>8</sup> **3d**,<sup>9</sup> **3e**,<sup>3</sup> **3f**,<sup>10</sup> **3h**,<sup>3</sup> **3i**,<sup>11</sup> **3j**,<sup>5</sup> **3k**,<sup>12</sup> **3l**<sup>13a</sup> were prepared following the previously described procedures.

Aryne precursors **9a–f** were commercial grade and used as received. Aryne precursor **9g** was synthesized according to a literature method.<sup>13b</sup>

Exact structures of compounds **1**, **2**, **3** and **9** are given in Figures S1–S4.

a. Synthesis of 5,6-dihydro-4H-1,2-oxazine N-oxides **1a-m**

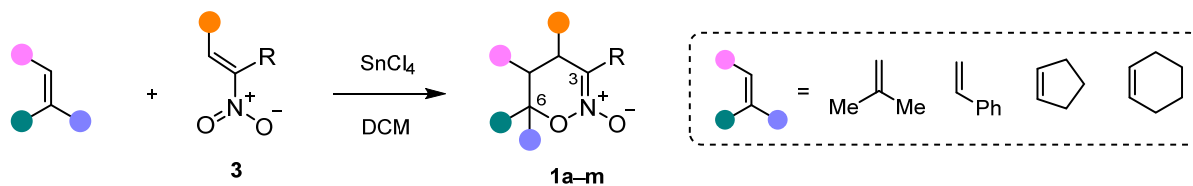

b. Synthesis of isoxazoline N-oxides **2a-e**

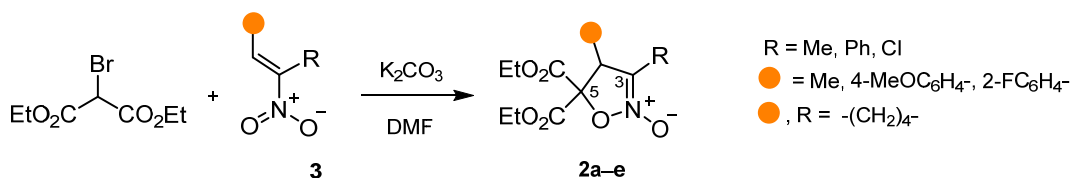

c. Synthesis of isoxazoline N-oxides **2f-i**

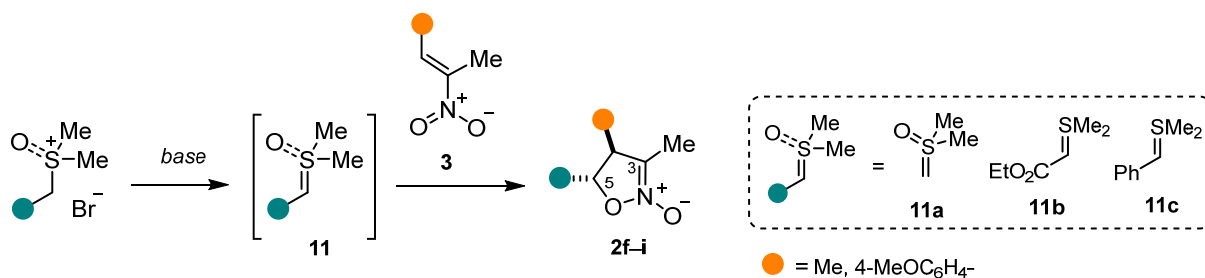

**Scheme S1.** General scheme for the synthesis of cyclic nitronates **1** and **2**

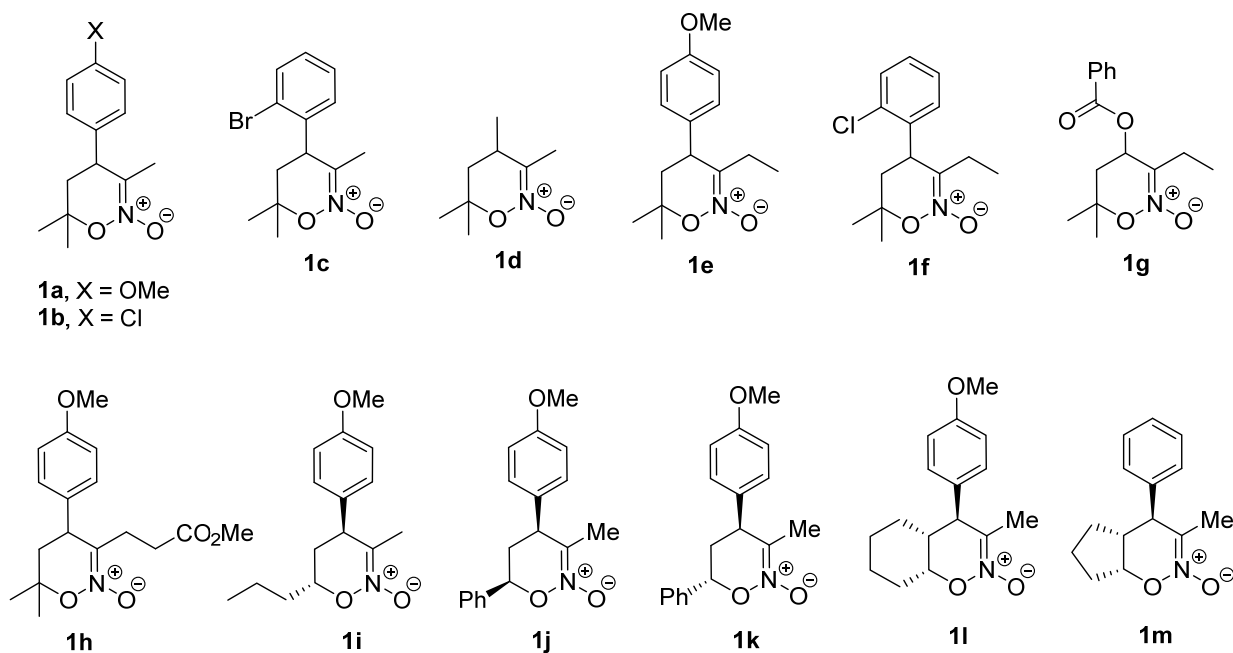

**Fig. S1.** Structures of 5,6-dihydro-4H-1,2-oxazine N-oxides **1a-m**

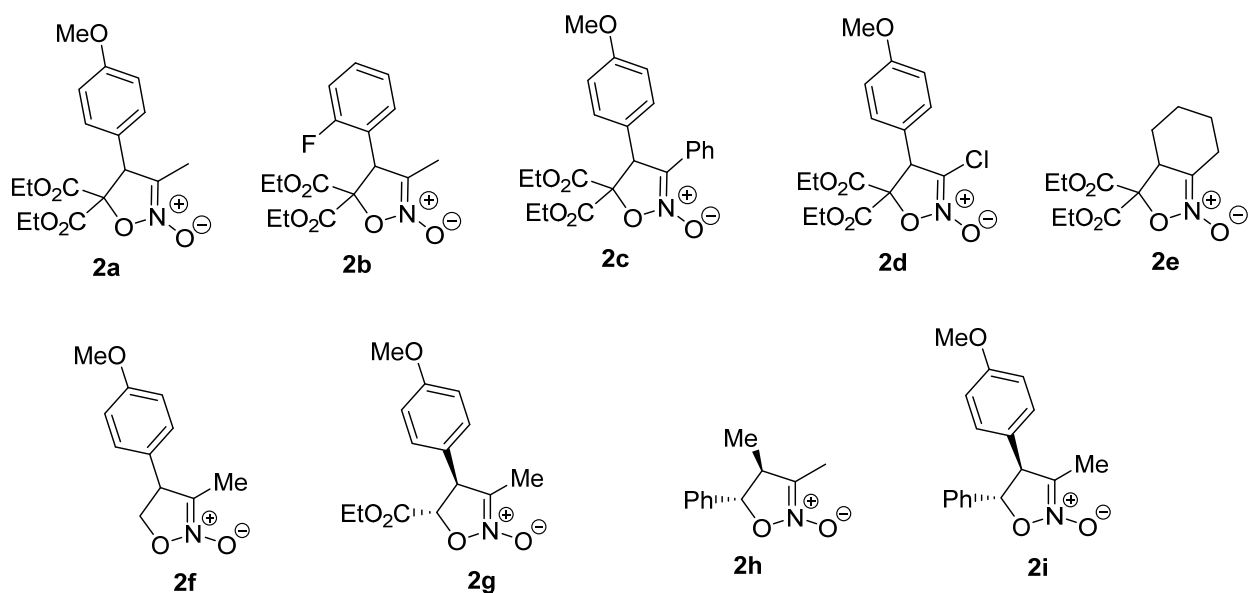

**Fig. S2.** Structures of isoxazoline *N*-oxides **2a–i**

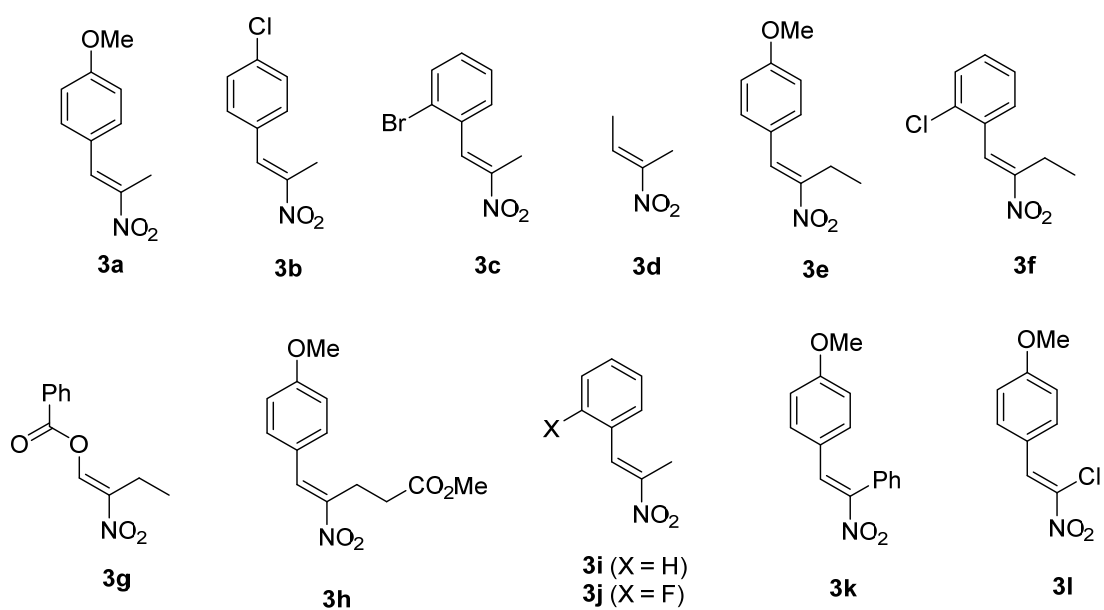

**Fig. S3.** Structures of nitroalkenes **3a–m**

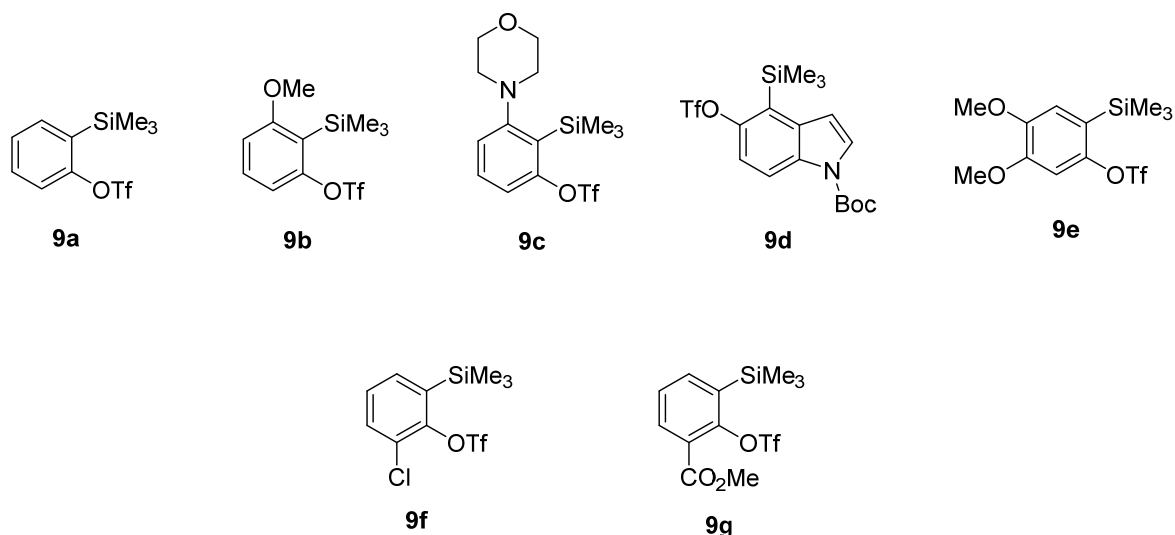

**Fig. S4.** Structures of aryne precursors **9a–g**

**(E)-2-Nitrobut-1-en-1-yl benzoate (3g)**

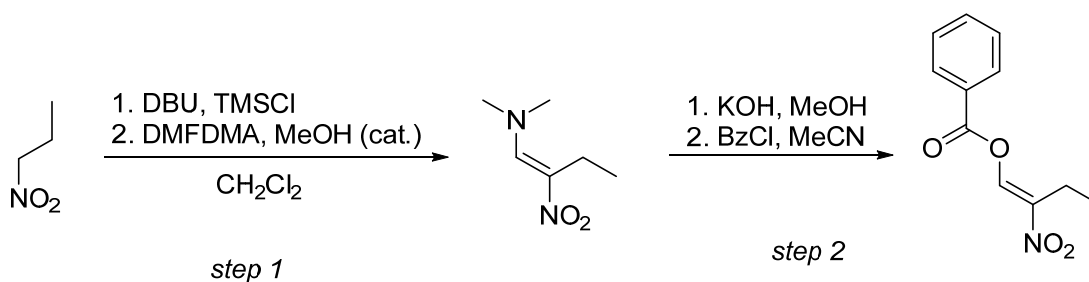

**Step 1:**<sup>14</sup> To the solution of 1-nitropropane (2.2 mL, 2.3 g, 30 mmol) in  $\text{CH}_2\text{Cl}_2$  (30 mL) DBU (4.4 mL, 4.5 g, 32 mmol, 1.05 equiv.) was added dropwise at  $-15\text{ }^\circ\text{C}$  with stirring. After 20 min TMSCl (4.2 mL, 3.6 g, 33 mmol, 1.1 equiv.) was added. The reaction mixture was stirred for 10 min, cooling bath was removed. After 40 min, the reaction mixture was cooled to  $-78\text{ }^\circ\text{C}$ , dimethylformamide dimethylacetal (DMFDMA) (4.4 mL, 3.9 g, 33 mmol, 1.1 equiv.) was added dropwise, then MeOH (60  $\mu\text{L}$ , 48 mg, 1.5 mmol, 0.05 equiv.) was added. The reaction mixture was allowed to warm to room temperature, maintained overnight and evaporated.  $\text{Et}_2\text{O}$  (100 mL) was added to the residue resulting in the formation of precipitate. The mixture was vigorously stirred for 0.5 h, and the organic layer was decanted. Such process was repeated 5 times with fresh portions of  $\text{Et}_2\text{O}$  (100 mL). Combined ethereal extract was evaporated to give 3.4 g (79%) of target *N,N*-dimethyl-2-nitrobut-1-en-1-amine as dark orange oil that solidifies upon storage in a freezer. NMR matches previously reported data.<sup>14</sup>

**Step 2:** To a solution of KOH (108 mg, 1.93 mmol, 1.1 equiv.) in MeOH (1.41 mL) at  $0\text{ }^\circ\text{C}$  was added *N,N*-dimethyl-2-nitrobut-1-en-1-amine from the previous stage (252 mg, 1.75 mmol, 1 equiv.). The reaction mixture was stirred for 3 hours at  $0\text{ }^\circ\text{C}$  and then concentrated under reduced pressure. To the red-orange precipitate MeCN (0.5 mL) was added. The resulting suspension was concentrated under reduced pressure and the precipitate was dried in vacuo. Then MeCN (1.75 mL) was added. The resulting suspension was cooled to  $0\text{ }^\circ\text{C}$  and benzoyl chloride (271 mg, 223  $\mu\text{L}$ , 1.93 mmol, 1.1 equiv.) was added dropwise with stirring. The reaction mixture was kept at  $0\text{ }^\circ\text{C}$  upon vigorous stirring for 8 hours and then kept in the refrigerator overnight. The resulting mixture was poured into mixture of

CH<sub>2</sub>Cl<sub>2</sub> (10 ml) and sat. aq solution of NaHCO<sub>3</sub> (10 mL). The aqueous phase was extracted with CH<sub>2</sub>Cl<sub>2</sub> (3 × 5 mL); the combined organic layers were washed with H<sub>2</sub>O (10 mL), brine (10 mL), dried (Na<sub>2</sub>SO<sub>4</sub>) and concentrated under reduced pressure. The residue was subjected to silica gel column chromatography (eluent: PE/EtOAc, 100:0, then 40:1, then 30:1) to give 287 mg (74%) of title compound as white solid. R<sub>f</sub> = 0.80 (PE/ EtOAc, 10:1, ninhydrin). mp = 79-81 °C (PE/EtOAc, 5 : 1).

<sup>1</sup>H NMR (300 MHz, CDCl<sub>3</sub>): δ 1.26 (t, *J* = 7.4 Hz, 3H, CH<sub>2</sub>CH<sub>3</sub>), 2.84 (q, *J* = 7.4 Hz, 2H, CH<sub>2</sub>CH<sub>3</sub>), 7.57 (app t, *J* = 7.7 Hz, 2H, CH<sub>Bz</sub>), 7.72 (tt, *J* = 7.4, 1.3 Hz, 1H, CH<sub>Bz</sub>), 8.14 (app d, *J* = 7.1 Hz, 2H, CH<sub>Bz</sub>).

<sup>13</sup>C NMR (75 MHz, DEPT, CDCl<sub>3</sub>): δ 12.1 (CH<sub>2</sub>CH<sub>3</sub>), 19.1 (CH<sub>2</sub>CH<sub>3</sub>), 127.2 (C<sub>Bz</sub>), 129.0 (CH<sub>Bz</sub>), 130.4 (CH<sub>Bz</sub>), 135.0 (CH<sub>Bz</sub>), 142.8 (=CH-O), 143.3 (C-NO<sub>2</sub>), 161.8 (C=O).

Anal. Calcd for C<sub>11</sub>H<sub>11</sub>NO<sub>4</sub>: C, 59.73; H, 5.01; N, 6.33. Found: C, 59.84; H, 5.00; N, 6.33.

### General procedure for the preparation of 5,6-dihydro-4H-1,2-oxazine N-oxides **1c,d,g-l** (GP-1)

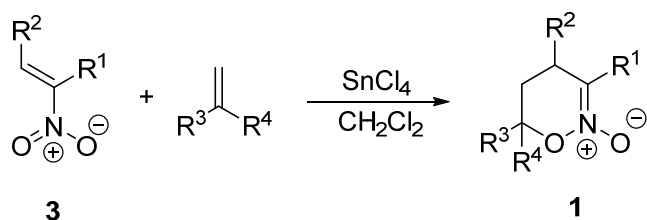

SnCl<sub>4</sub> (1.1-1.2 equiv) was added to the stirred solution of the corresponding nitroalkene in CH<sub>2</sub>Cl<sub>2</sub> (5 mL / 1 mmol of nitroalkene) at -78 °C under argon atmosphere. Then the corresponding alkene (either neat or soln in CH<sub>2</sub>Cl<sub>2</sub> (1.5-5 equiv.)) was added. The reaction mixture was stirred for 15-60 min and then poured into a mixture of EtOAc (150 mL) and NaHCO<sub>3</sub> (sat. aq. soln, 100 mL). The organic layer was washed with saturated aqueous solution of NaHCO<sub>3</sub> (sat. aq. soln, 50 mL), H<sub>2</sub>O (100 mL), brine (50 mL), dried over Na<sub>2</sub>SO<sub>4</sub>, and evaporated under vacuum. Title compounds were isolated either by crystallization or column chromatography.

**4-(2-Bromophenyl)-3,6,6-trimethyl-5,6-dihydro-4H-1,2-oxazine 2-oxide (1c)**. Prepared according to GP-1 from (*E*)-1-bromo-2-(2-nitroprop-1-en-1-yl)benzene **3c** (500 mg, 2.1 mmol) and 2-methylpropene (1.9 mL of 5.5 M soln in CH<sub>2</sub>Cl<sub>2</sub>, 0.58 g, 10.5 mmol) using 1.1 equiv of SnCl<sub>4</sub>. Reaction time – 15 min. Column chromatography (eluent: PE/EtOAc, 2:1, then 1:1, then EtOAc) afforded an oil, which was triturated with PE to give 345 mg (56%) of target compound as white solid. R<sub>f</sub> = 0.26 (PE/EtOAc, 1:2, UV, anisaldehyde). mp = 99-101 °C.

<sup>1</sup>H NMR (300 MHz, CDCl<sub>3</sub>): δ 1.42 (s, 3H, Me(6)), 1.49 (s, 3H, Me(6)), 1.84 (dd, overlapped, *J* = 13.7, 11.1 Hz, 1H, CH<sub>2a</sub>(5)), 1.89 (d, *J* = 1.5 Hz, 3H, Me(3)), 2.22 (dd, *J* = 13.7, 7.9 Hz, 1H, CH<sub>2b</sub>(5)), 4.26 (ddq, *J* = 11.1, 7.9, 1.3 Hz, 1H, CH(4)), 7.13-7.18 (m, 2H, CH<sub>Ar</sub>), 7.33 (app td, *J* = 7.5, 1.3 Hz, 1H, CH<sub>Ar</sub>), 7.56-7.59 (d, *J* = 7.3 Hz, 2H, CH<sub>Bz</sub>).

<sup>13</sup>C NMR (75 MHz, DEPT, CDCl<sub>3</sub>): δ 17.3 (Me(3)), 22.0 (Me(6)), 27.8 (Me(6)), 39.4 (CH<sub>2</sub>(5)), 42.6 (CH(4)), 81.4 (C(6)), 121.2 (C(3)=N), 123.7 (C<sub>Ar</sub>-Br), 128.6 (CH<sub>Ar</sub>), 129.2 (CH<sub>Ar</sub>), 129.3 (CH<sub>Ar</sub>), 133.4 (CH<sub>Ar</sub>), 139.4 (C<sub>Ar</sub>).

HRMS (ESI): *m/z* calcd. for [C<sub>13</sub>H<sub>16</sub>BrNO<sub>2</sub>+H<sup>+</sup>]: 298.0437, found: 298.0445.

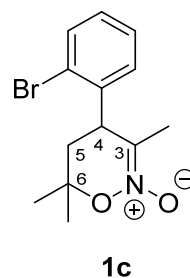

**3,4,6,6-Tetramethyl-5,6-dihydro-4H-1,2-oxazine 2-oxide (1d).** Prepared according to GP-1 from (*E*)-2-nitrobut-2-ene **3d** (500 mg, 5 mmol) and 2-methylpropene (1.4 g, 25 mmol) using 1.2 equiv of SnCl<sub>4</sub>. Reaction time – 60 min. Column chromatography (eluent: PE/EtOAc, 2:1, then 1:1) afforded 405 mg (52%) of target compound as white solid. R<sub>f</sub> = 0.18 (PE/EtOAc, 1:1, UV, anisaldehyde). mp = 61-63 °C. NMR matches previously reported data.<sup>4</sup>

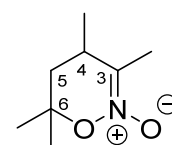

**1d**

**4-(Benzoyloxy)-3-ethyl-6,6-dimethyl-5,6-dihydro-4H-1,2-oxazine 2-oxide (1g).** Prepared according to GP-1 from (*E*)-2-nitrobut-1-en-1-yl benzoate **3g** (622 mg, 3 mmol) and 2-methylpropene (0.84 g, 15 mmol) using 1.1 equiv of SnCl<sub>4</sub>. Reaction time – 30 min. Column chromatography (eluent: PE/EtOAc, 5:1, then 3:1, then 2:1) afforded 462 mg (56%) of target compound as white solid. R<sub>f</sub> = 0.33 (PE/EtOAc, 3:1, UV, anisaldehyde). mp = 86-88 °C (PE/EtOAc, 10:1).

<sup>1</sup>H NMR (300 MHz, CDCl<sub>3</sub>): δ 1.18 (t, *J* = 7.5 Hz, 3H, CH<sub>2</sub>CH<sub>3</sub>), 1.44 (s, 3H, Me(6)), 1.54 (s, 3H, Me(6)), 2.08 (dd, *J* = 14.7, 4.0 Hz, 1H, CH<sub>2a</sub>(5)), 2.34 (dd, *J* = 14.7, 6.7 Hz, 1H, CH<sub>2b</sub>(5)), 2.50 (q, *J* = 7.5 Hz, 2H, CH<sub>2</sub>CH<sub>3</sub>), 5.87 (dd, *J* = 6.7, 4.0 Hz, 1H, CH(4)), 7.48 (app t, *J* = 7.6 Hz, 2H, CH<sub>Bz</sub>), 7.61 (t, *J* = 7.5 Hz, 1H, CH<sub>Bz</sub>), 8.02 (d, *J* = 7.3 Hz, 2H, CH<sub>Bz</sub>).

<sup>13</sup>C NMR (75 MHz, DEPT, CDCl<sub>3</sub>): δ 8.9 (CH<sub>2</sub>CH<sub>3</sub>), 23.2 (CH<sub>2</sub>CH<sub>3</sub>), 24.6 (Me(6)), 26.1 (Me(6)), 37.5 (CH<sub>2</sub>(5)), 65.6 (CH(4)), 80.7 (C(6)), 121.8 (C(3)=N), 128.7 (CH<sub>Bz</sub>), 129.1 (C<sub>Bz</sub>), 129.7 (CH<sub>Bz</sub>), 133.7 (CH<sub>Bz</sub>), 165.5 (C=O).

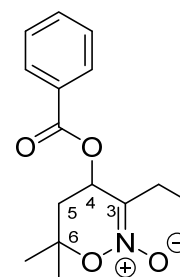

**1g**

HRMS (ESI): *m/z* calcd. for [C<sub>15</sub>H<sub>19</sub>NO<sub>4</sub>+H<sup>+</sup>]: 278.1387, found: 278.1389.

**3-(3-Methoxy-3-oxopropyl)-4-(4-methoxyphenyl)-6,6-dimethyl-5,6-dihydro-4H-1,2-oxazine 2-oxide (1h).** Prepared according to GP-1 from methyl (*E*)-5-(4-methoxyphenyl)-4-nitropent-4-enoate **3h** (1.33 g, 5 mmol) and 2-methylpropene (1.4 g, 25 mmol) using 1.1 equiv of SnCl<sub>4</sub>. Reaction time – 30 min. Column chromatography (eluent: PE/EtOAc, 3:1, then 1:1) afforded 1.46 g (91%) of title compound as a pale yellow oil. R<sub>f</sub> = 0.28 (PE/EtOAc, 1:1, UV, anisaldehyde).

<sup>1</sup>H NMR (300 MHz, CDCl<sub>3</sub>): δ 1.39 (s, 3H, Me(6)), 1.42 (s, 3H, Me(6)), 1.94 (dd, *J* = 14.0, 11.2 Hz, 1H, CH<sub>2a</sub>(5)), 2.10 (dd, *J* = 14.0, 7.8 Hz, 1H, CH<sub>2b</sub>(5)), 2.21-2.38 (m, 2H), 2.48-2.58 (m, 1H), and 2.94-3.06 (m, 1H) (2 × CH<sub>2</sub>), 3.63 (s, 3H, CO<sub>2</sub>Me), 3.79 (s, 3H, OMe), 3.91 (dd, *J* = 11.2, 7.8 Hz, 1H, CH(4)), 6.87 (d, *J* = 8.7 Hz, 2H, CH<sub>Ar</sub>), 7.13 (d, *J* = 8.7 Hz, 2H, CH<sub>Ar</sub>).

<sup>13</sup>C NMR (75 MHz, DEPT, CDCl<sub>3</sub>): δ 21.8 (Me(6)), 26.1 (CH<sub>2</sub>), 27.7 (CH<sub>2</sub>), 27.8 (Me(6)), 41.6 (CH<sub>2</sub>), 41.9 (CH(4)), 51.7 (CO<sub>2</sub>Me), 55.3 (OMe), 81.5 (C(6)), 114.6 (CH<sub>Ar</sub>), 124.4 (C(3)=N), 129.2 (CH<sub>Ar</sub>), 131.9 (C<sub>Ar</sub>), 159.1 (C<sub>Ar</sub>-OMe), 173.5 (C=O).

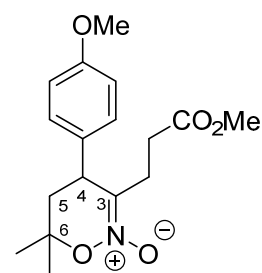

**1h**

HRMS (ESI): *m/z* calcd. for [C<sub>17</sub>H<sub>23</sub>NO<sub>5</sub>+H<sup>+</sup>]: 322.1649, found: 322.1653.

**(4S\*,6R\*)-4-(4-Methoxyphenyl)-3-methyl-6-propyl-5,6-dihydro-4H-1,2-oxazine 2-oxide (1i).** Prepared according to GP-1 from (*E*)-1-methoxy-4-(2-nitroprop-1-en-1-yl)benzene **3a** (580 mg, 3 mmol) and 1-pentene (0.42 mL, 0.27 g, 4.5 mmol) using 1.2 equiv of SnCl<sub>4</sub>. Reaction time – 30 min. Column chromatography (eluent: PE/EtOAc, 3:1, then 2:1, then 1:1) afforded 626 mg (74%) of title compound as white solid. R<sub>f</sub> = 0.55 (PE/EtOAc, 1:1, UV, anisaldehyde). mp = 75-76 °C (PE/EtOAc, 5:1).



$^1\text{H}$  NMR (300 MHz,  $\text{CDCl}_3$ ):  $\delta$  0.87 (t,  $J = 7.1$  Hz, 3H,  $\text{CH}_2\text{CH}_3$ ), 1.31-1.54 (m, 3H) and 1.61-1.75 (m, 1H) ( $\text{CH}_2\text{CH}_2\text{CH}_3$ ), 1.84 (app dt,  $J = 13.7, 2.2$  Hz, 1H,  $\text{CH}_{2a}(5)$ ), 1.96 (s, 3H, Me(3)), 2.10 (ddd,  $J = 13.7, 10.7, 7.0$  Hz, 1H,  $\text{CH}_{2b}(5)$ ), 3.74 (app d,  $J = 6.6$  Hz, 1H, CH(4)), 3.81 (s, 3H, OMe), 4.35-4.44 (m, 1H, CH(6)-O), 6.89 (d,  $J = 8.7$  Hz, 2H,  $\text{CH}_{Ar}$ ), 7.09 (d,  $J = 8.7$  Hz, 2H,  $\text{CH}_{Ar}$ ).

$^{13}\text{C}$  NMR (75 MHz, DEPT,  $\text{CDCl}_3$ ):  $\delta$  13.9 ( $\text{CH}_2\text{CH}_3$ ), 18.1 ( $\text{CH}_2$ ), 18.6 (Me(3)), 33.9 ( $\text{CH}_2$ ), 35.3 ( $\text{CH}_2$ ), 42.1 (CH(4)), 55.3 (OMe), 77.2 (CH(6)), 114.5 ( $\text{CH}_{Ar}$ ), 121.2 (C(3)=N), 128.9 ( $\text{CH}_{Ar}$ ), 133.7 ( $\text{C}_{Ar}$ ), 158.9 ( $\text{C}_{Ar}-\text{O}$ ).

HRMS (ESI):  $m/z$  calcd. for  $[\text{C}_{15}\text{H}_{21}\text{NO}_3+\text{H}^+]$ : 264.1594, found: 264.1596.

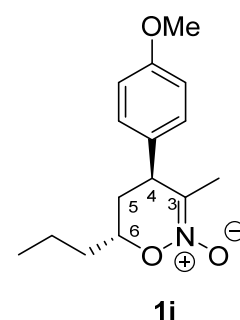

**4-(4-Methoxyphenyl)-3-methyl-6-phenyl-5,6-dihydro-4H-1,2-oxazine 2-oxides (4*S*\*,6*R*\*)-1j (4,6-*cis*-isomer) and (4*S*\*,6*S*\*)-1k (*trans*-isomer).** Prepared according to GP-1 from (*E*)-1-methoxy-4-(2-nitroprop-1-en-1-yl)benzene **3a** (1.8 g, 9.3 mmol) and styrene (2.1 mL, 1.9 g, 19 mmol) using 1.2 equiv of  $\text{SnCl}_4$  with an exception that styrene was added at  $-94^\circ\text{C}$  and then the temperature was raised to  $-78^\circ\text{C}$  and the mixture was stirred for 30 min. Column chromatography (eluent: PE/EtOAc, 2:1, then 1:1, then 1:2) afforded 1.20 g (43%) of *trans*-isomer **1k** as pale yellow solid, 507 g (18%) of **1j/1k** mixture (ratio 1:1) as pale yellow solid, and 356 mg (13 %) of *cis*-isomer **1j** as white solid. NMR matches previously reported data.<sup>15</sup>

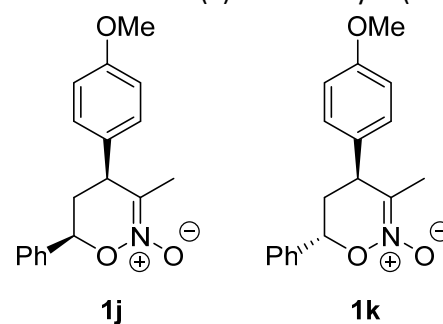

**(4*S*\*,6*R*\*)-1j**  $R_f = 0.38$  (PE/EtOAc, 1:1, UV, anisaldehyde).

**(4*S*\*,6*S*\*)-1k**  $R_f = 0.48$  (PE/EtOAc, 1:1, UV, anisaldehyde).

**(4*S*\*,4*aR*\*,8*aR*\*)-4-(4-Methoxyphenyl)-3-methyl-4*a*,5,6,7,8,8*a*-hexahydro-4H-benzo[e][1,2]oxazine 2-oxide (**1l**).** Prepared according to GP-1 from (*E*)-1-methoxy-4-(2-nitroprop-1-en-1-yl)benzene **3a** (4.0 g, 21 mmol) and cyclohexene (10.5 mL, 8.5 g, 0.1 mol) using 1.2 equiv. of  $\text{SnCl}_4$ . Reaction time – 30 min. Crystallization from PE/MTBE, 1:2, afforded 3.0 g (53%) of title compound as pale yellow solid.  $R_f = 0.26$  (PE/EtOAc, 1:1, UV, anisaldehyde).

$^1\text{H}$  NMR (300 MHz,  $\text{CDCl}_3$ ):  $\delta$  1.26-1.49 (m, 3H) and 1.61-1.82 (m, 5H) ( $4\times\text{CH}_2$ ), 1.97 (s, 3H, Me), 2.02-2.08 (m, 1H, CH), 3.34 (br s, 1H, CH-Ar), 3.80 (s, 3H, OMe), 4.59 (br s, 1H, CH-O), 6.89 (d,  $J = 8.6$  Hz, 2H,  $\text{CH}_{Ar}$ ), 7.07 (d,  $J = 8.6$  Hz, 2H,  $\text{CH}_{Ar}$ ).

$^{13}\text{C}$  NMR (75 MHz, DEPT,  $\text{CDCl}_3$ ):  $\delta$  18.8 (Me), 19.9 ( $\text{CH}_2$ ), 24.6 ( $\text{CH}_2$ ), 27.5 ( $\text{CH}_2$ ), 28.7 ( $\text{CH}_2$ ), 40.0 (CH), 49.4 ( $\text{CH}-\text{Ar}$ ), 55.3 (OMe), 75.4 (CH-O), 114.4 ( $\text{CH}_{Ar}$ ), 120.1 (C(3)=N), 128.8 ( $\text{CH}_{Ar}$ ), 133.5 ( $\text{C}_{Ar}$ ), 158.9 ( $\text{C}_{Ar}-\text{O}$ ).

NMR matches previously reported data.<sup>16</sup>

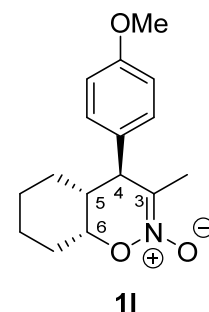

### 5,5-Bis(ethoxycarbonyl)-4-(4-methoxyphenyl)-3-methyl-4,5-dihydroisoxazole 2-oxide (2a)

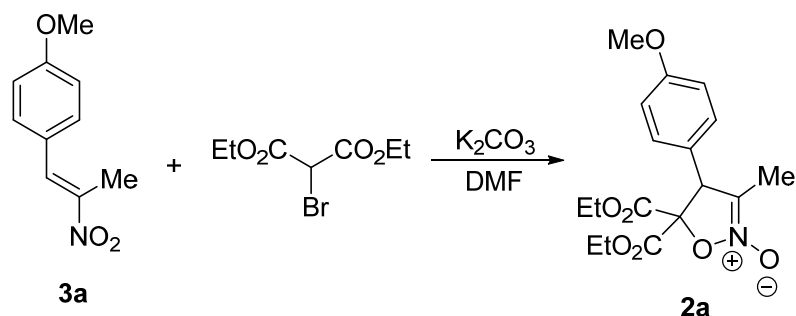

To a solution of (*E*)-1-methoxy-4-(2-nitroprop-1-en-1-yl)benzene **3a** (965 mg, 5 mmol) in DMF (10 mL) diethyl bromomalonate (0.94 mL, 1.32 g, 5.5 mmol, 1.1 equiv.) and potassium carbonate (1.03 g, 7.5 mmol, 1.5 equiv.) were added. The mixture was stirred for 6 h at r.t. and then kept in the fridge overnight. Then the reaction was transferred into a separating funnel containing EtOAc (100 mL) and water (100 mL). The organic phase was separated, and the aqueous phase was extracted with EtOAc (3 × 50 mL). The combined organic layer was washed with brine (50 mL), dried over Na<sub>2</sub>SO<sub>4</sub>, and concentrated under reduced pressure. The residue was subjected to column chromatography on silica gel (eluent: PE/EtOAc, 3:1, then 2:1, then 1:1) to give target isoxazoline *N*-oxide **2a** (1.21 g, 69%) as white solid. *R*<sub>f</sub> = 0.25 (PE/EtOAc, 1:1, UV, anisaldehyde). NMR matches previously reported data.<sup>8</sup>

### 5,5-Bis(ethoxycarbonyl)-4-(4-methoxyphenyl)-3-phenyl-4,5-dihydroisoxazole 2-oxide (2c)

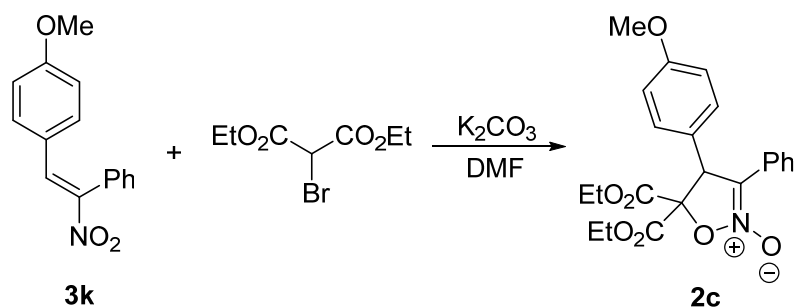

To a stirring solution of nitroalkene **3k** (255 mg, 1 mmol) in DMF (2 mL) diethyl bromomalonate (188 μL, 264 mg, 1.1 mmol) and K<sub>2</sub>CO<sub>3</sub> (201 mg, 1.46 mmol) were consecutively added. The mixture was stirred for 3 h at r.t., and then concentrated on a rotary evaporator. The residue was subjected to column chromatography on silica gel (eluent: PE/EtOAc, 10:1, then 5:1, then 3:1) to give target isoxazoline *N*-oxide **2c** (413 mg, 99%) as colorless oil. Solid sample was obtained by crystallization from Et<sub>2</sub>O/PE, 6:1. *R*<sub>f</sub> = 0.33 (PE/EtOAc, 3:1, UV, anisaldehyde). mp = 90-93 °C (Et<sub>2</sub>O/PE, 6:1).

<sup>1</sup>H NMR (300 MHz, CDCl<sub>3</sub>): δ 0.97 (t, *J* = 7.1 Hz, 3H, CH<sub>2</sub>CH<sub>3</sub>), 1.34 (t, *J* = 7.1 Hz, 3H, CH<sub>2</sub>CH<sub>3</sub>), 3.76 (s, 3H, OMe), 3.76-3.92 (m, 2H, OCH<sub>2</sub>CH<sub>3</sub>), 4.26-4.46 (m, 2H, OCH<sub>2</sub>CH<sub>3</sub>), 5.72 (s, 1H, CH(4)), 6.84 (d, *J* = 8.7 Hz, 1H, CH<sub>Ar</sub>), 7.26 (d, *J* = 8.7 Hz, 1H, CH<sub>Ar</sub>), 7.30-7.38 (m, 3H, Ph), 7.82-7.86 (m, 2H, Ph).

<sup>13</sup>C NMR (75 MHz, CDCl<sub>3</sub>): δ 13.6 (CH<sub>2</sub>CH<sub>3</sub>), 13.9 (CH<sub>2</sub>CH<sub>3</sub>), 54.9 (CH(4)), 55.3 (OMe), 62.5 (OCH<sub>2</sub>CH<sub>3</sub>), 63.5 (OCH<sub>2</sub>CH<sub>3</sub>), 85.0 (C(5)), 114.2 (CH<sub>Ar</sub>), 115.5 (C(3)=N), 125.2 and 125.7 (C<sub>Ar</sub> and C<sub>Ph</sub>), 127.0, 128.7, 129.7, and 130.3 (3×CH<sub>Ph</sub> and CH<sub>Ar</sub>), 160.0 (C<sub>Ar</sub>-O), 163.6 (C=O), 166.6 (C=O).

HRMS (ESI): *m/z* calcd. for [C<sub>22</sub>H<sub>23</sub>NO<sub>7</sub>+H<sup>+</sup>]: 414.1547, found: 414.1559.

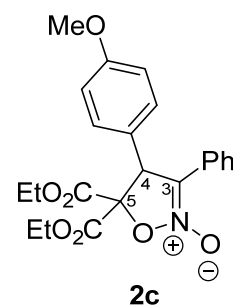

### 3-Chloro-5,5-bis(ethoxycarbonyl)-4-(4-methoxyphenyl)-4,5-dihydroisoxazole 2-oxide (2d)

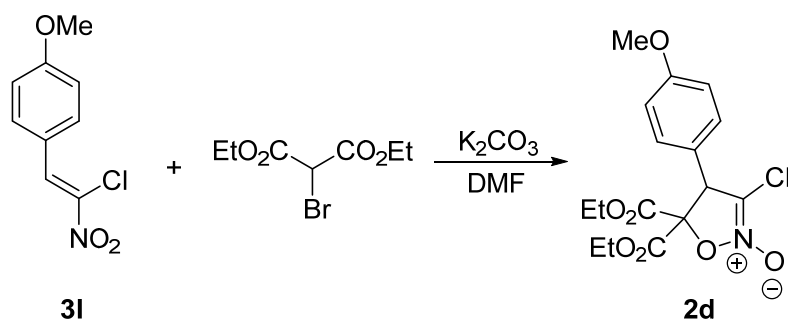

To a solution of (*Z*)-1-(2-chloro-2-nitrovinyl)-4-methoxybenzene **3I** (230 mg, 1.1 mmol) in DMF (5 mL) diethyl bromomalonate (0.20 mL, 0.28 g, 1.2 mmol, 1.1 equiv.) and potassium carbonate (0.22 g, 1.6 mmol, 1.5 equiv.) were added. The mixture was stirred for 2.5 h, transferred into a separating funnel containing MTBE (50 mL) and water (30 mL). The organic phase was separated, and the aqueous phase was extracted with MTBE (20 mL). The combined organic layer was washed with brine (30 mL), dried over  $Na_2SO_4$ , and concentrated under reduced pressure. The residue was recrystallized from PE/EtOAc, 3:1 to give target isoxazoline *N*-oxide (252 mg) as white solid. The mother liquor was evaporated and crystallized to give additional target isoxazoline *N*-oxide **2d** (89 mg). Total yield: 341 mg (85%).  $R_f = 0.53$  (PE/EtOAc, 1:1, UV, anisaldehyde). mp = 109-111 °C (PE/EtOAc, 10:1).

$^1H$  NMR (300 MHz,  $CDCl_3$ ):  $\delta$  0.93 (t,  $J = 7.1$  Hz, 3H,  $CH_2CH_3$ ), 1.34 (t,  $J = 7.1$  Hz, 3H,  $CH_2CH_3$ ), 3.69-3.92 (m, 2H,  $OCH_2CH_3$ ), 3.82 (s, overlapped, 3H, OMe), 4.28-4.46 (m, 2H,  $OCH_2CH_3$ ), 5.39 (s, 1H, CH(4)), 6.91 (d,  $J = 8.5$  Hz, 1H,  $CH_{Ar}$ ), 7.20 (d,  $J = 8.5$  Hz, 1H,  $CH_{Ar}$ ).

$^{13}C$  NMR (75 MHz, DEPT, HMBC,  $CDCl_3$ ):  $\delta$  13.5 ( $CH_2CH_3$ ), 13.9 ( $CH_2CH_3$ ), 54.6 (CH(4)), 55.4 (OMe), 62.8 ( $OCH_2CH_3$ ), 63.8 ( $OCH_2CH_3$ ), 84.7 (C(5)), 109.5 (C(3)=N), 114.4 ( $CH_{Ar}$ ), 123.2 ( $C_{Ar}$ ), 130.5 ( $CH_{Ar}$ ), 160.5 ( $C_{Ar}-O$ ), 163.1 (C=O), 165.5 (C=O).

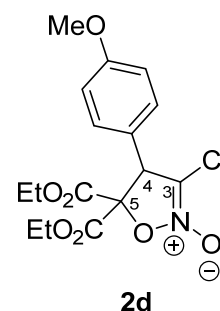

HRMS (ESI):  $m/z$  calcd. for  $[C_{16}H_{18}ClNO_7+NH_4^+]$ : 389.1110, found: 389.1114.

### 3,3-Bis(ethoxycarbonyl)-3,3a,4,5,6,7-hexahydrobenzo[*c*]isoxazole 1-oxide (2e)

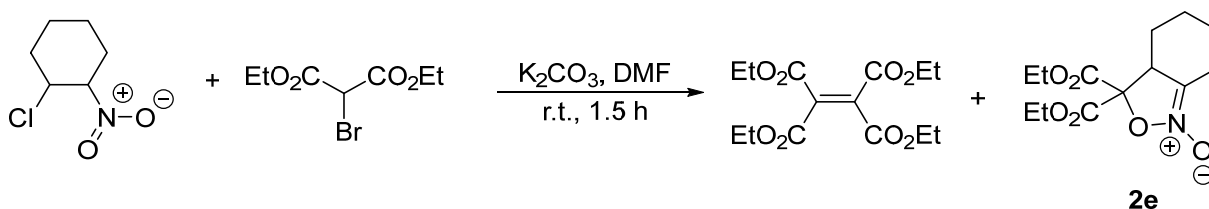

To the solution of 1-chloro-2-nitrocyclohexane<sup>17</sup> (0.350 mg, 2.1 mmol) and diethyl bromomalonate (0.39 mL, 0.55 g, 2.3 mmol, 1.1 equiv.) in DMF (6.3 mL)  $K_2CO_3$  (0.725 g, 5.3 mmol, 2.5 equiv.) was added. The mixture was stirred for 1.5 h, and transferred into EtOAc/ $H_2O$  (60/20 mL). Organic layer was washed with  $H_2O$  (20 mL), brine (20 mL), dried over  $Na_2SO_4$ , and evaporated. The residue was subjected to column chromatography on silica gel (eluent: PE/EtOAc, 5:1, then 4:1, then 1:1) to give tetraethyl

ethylenetetracarboxylate (0.183 g) and target isoxazoline *N*-oxide **2e** (0.200 g, 33%) as colorless oil.  $R_f = 0.17$  (PE/EtOAc, 3:1, UV, anisaldehyde).

$^1\text{H}$  NMR (300 MHz, COSY,  $\text{CDCl}_3$ ):  $\delta$  1.14-1.46 (m, overlapped, 3H,  $\text{CH}_2$ ), 1.30 (t, overlapped,  $J = 7.1$  Hz, 3H,  $\text{CH}_2\text{CH}_3$ ), 1.32 (t, overlapped,  $J = 7.1$  Hz, 3H,  $\text{CH}_2\text{CH}_3$ ), 1.93-1.97 (m, 2H,  $\text{CH}_2$ ), 2.03-2.09 (m, 1H,  $\text{CH}_2$ ), 2.15-2.25 (m, 1H,  $\text{CH}_2$ ), 2.75-2.80 (m, 1H,  $\text{CH}_2$ ), 4.02 (ddd,  $J = 12.2, 5.7, 2.8$  Hz, 1H,  $\text{CH}(3a)$ ), 4.21-4.41 (m, 4H,  $\text{OCH}_2$ ).

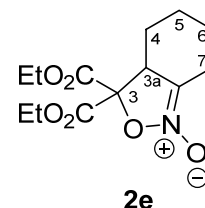

$^{13}\text{C}$  NMR (75 MHz, DEPT, HSQC,  $\text{CDCl}_3$ ):  $\delta$  13.9 ( $\text{CH}_2\text{CH}_3$ ), 14.2 ( $\text{CH}_2\text{CH}_3$ ), 23.8, 23.9 and 24.3 ( $\text{CH}_2(5)$ ,  $\text{CH}_2(6)$  and  $\text{CH}_2(7)$ ), 28.1 ( $\text{CH}_2(4)$ ), 48.2 ( $\text{CH}(3a)$ ), 62.6 ( $\text{OCH}_2$ ), 63.2 ( $\text{OCH}_2$ ), 83.2 ( $\text{C}(3)$ ), 114.0 ( $\text{C}=\text{N}$ ), 165.4 ( $\text{C}=\text{O}$ ), 165.9 ( $\text{C}=\text{O}$ ).

HRMS (ESI):  $m/z$  calcd. for  $[\text{C}_{13}\text{H}_{19}\text{NO}_6 + \text{NH}_4^+]$ : 303.1551, found: 303.1548.

#### 4-(4-Methoxyphenyl)-3-methyl-4,5-dihydroisoxazole 2-oxide (**2f**).

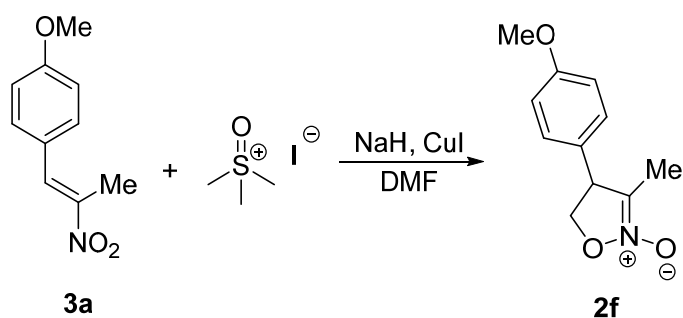

Prepared similar to a literature procedure.<sup>18</sup> To a suspension of trimethylsulfoxonium iodide (3.30 g, 15 mmol, 1.2 equiv.) in DMF (65 mL) sodium hydride (575 mg, 14.4 mmol, ~60% in mineral oil, 1.15 equiv.) was added. After vigorous stirring for 1 hour copper(I) iodide (952 mg, 5 mmol, 0.4 equiv.) was added. Upon stirring for 30 min color changed from gray to dark-orange. Then the solution was cooled  $0^\circ\text{C}$  with an ice bath and solution of (*E*)-1-methoxy-4-(2-nitroprop-1-en-1-yl)benzene **3a** (2.42 g, 12.5 mmol, 1 equiv.) in DMF (15 mL) was added dropwise over the course of 20 min. After addition was complete, the ice bath was removed. After stirring for 2 hours at room temperature the reaction mixture was poured into 100 mL of ice cold water and then 150 mL of  $\text{CH}_2\text{Cl}_2$  was added. The resulting mixture was filtered through Celite, water layer was washed with  $\text{CH}_2\text{Cl}_2$  (3 $\times$ 50 mL). The aqueous layer was extracted with  $\text{CH}_2\text{Cl}_2$  (3 $\times$ 50 mL); the combined organic layers were washed with  $\text{H}_2\text{O}$  (100 mL), brine (100 mL), dried ( $\text{Na}_2\text{SO}_4$ ), and concentrated under reduced pressure. Most of DMF was then removed in vacuum at  $35^\circ\text{C}$  on water bath. The residue was subjected to silica gel column chromatography (eluent: PE/EtOAc, 3:1, then 1:1) to give 1.96 g (76%) of target nitronate as white solid.  $R_f = 0.31$  (PE/EtOAc, 1:1, UV, anisaldehyde). mp =  $92\text{-}93^\circ\text{C}$ . NMR matches previously reported data.<sup>19</sup>

## Synthesis and characterization data of nitroso acetals **5** and **6**

### General procedure for the synthesis of nitroso acetals **5** and **6** (GP-2):

Commercial CsF (152 mg, 1.0 mmol, 2.0 equiv) was placed in a Schlenk tube and dried at ~250 °C (heat gun) in a vacuum (~1-2 mmHg) for ~1 min. After the mixture had cooled, nitronate **1** or **2** (0.5 mmol, 1.0 equiv) and anhydrous acetonitrile (4.0 mL) were added under an argon atmosphere. After dissolution of the nitronate, aryne precursor **9** (0.5 mmol, 1.0 equiv) was added and the reaction mixture was stirred until full consumption of the nitronate (TLC control, 18–24 h). Then, EtOAc (~2 mL) and water (~4 mL) were added with vigorous stirring. After ~1 min, the mixture was transferred into a separating funnel containing EtOAc (15 mL) and water (15 mL). The organic phase was separated, and the aqueous phase was extracted with EtOAc (3 × 15 mL). The combined organic extracts were washed with brine (30 mL), dried with anhydrous Na<sub>2</sub>SO<sub>4</sub>, and concentrated under reduced pressure. The resulting crude product was subjected to column chromatography on silica gel (PE/EtOAc gradient).

### Isomers of products **5/6** and numeration of atoms

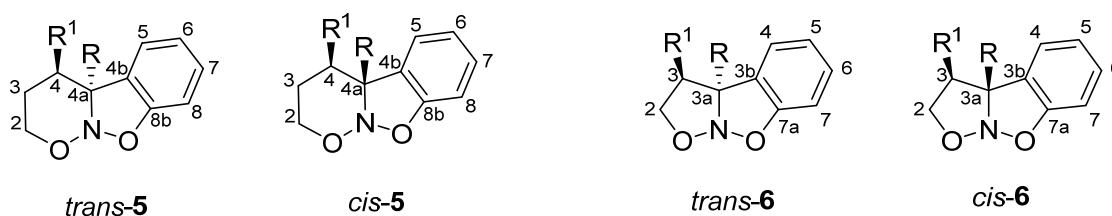

**(4S\*,4aS\*)-4-(4-Methoxyphenyl)-2,2,4a-trimethyl-2,3,4,4a-tetrahydrobenzo[4,5]isoxazolo[2,3-b][1,2]oxazine (*trans*-**5aa**)**. Nitroso acetal **5aa** was obtained from nitronate **1a** (100 mg, 0.40 mmol) and aryltriflate **9a** (98 μL, 120 mg, 0.40 mmol) according to GP-2. Column chromatography (eluent: PE/EtOAc, 30:1, then 20:1) afforded 113 mg (87%) of the target nitroso acetal as pale yellow solid. Single diastereomer (*trans*-**5aa**). R<sub>f</sub> = 0.62 (PE/EtOAc, 3:1, UV, anisaldehyde). mp = 93-95 °C (PE/MTBE, 1:1).

<sup>1</sup>H NMR (300 MHz, CDCl<sub>3</sub>): δ 1.43 (s, 3H, Me<sub>a</sub>(2)), 1.53 (s, 3H, Me<sub>b</sub>(2)), 1.60 (s, 3H, Me(4a)), 1.69 (dd, *J* = 13.5, 2.1 Hz, 1H, CH<sub>2a</sub>(3)), 2.11 (app t, *J* = 13.5 Hz, 1H, CH<sub>2b</sub>(3)), 3.19 (dd, *J* = 13.5, 2.1 Hz, 1H, CH(4)), 3.86 (s, 3H, OMe), 6.15 (d, *J* = 7.5 Hz, 1H, CH<sub>Ar</sub>(5)), 6.70 (app t, *J* = 7.5 Hz, 1H, CH<sub>Ar</sub>(6)), 6.81 (d, *J* = 8.0 Hz, 1H, CH<sub>Ar</sub>(8)), 6.88 (d, *J* = 8.6 Hz, 2H, CH<sub>Ar</sub>), 7.03 (d, *J* = 8.6 Hz, 2H, CH<sub>Ar</sub>), 7.17 (app t, *J* = 7.7 Hz, 1H, CH<sub>Ar</sub>(7)).

Characteristic NOESY-interactions: Me(4a) / CH<sub>Ar</sub>; CH(4) / Me(4a); CH<sub>2b</sub>(3) / CH<sub>Ar</sub>; CH<sub>Ar</sub>(5) / CH<sub>Ar</sub>; CH(4) / CH<sub>2a</sub>(3); CH<sub>2b</sub>(3) / Me<sub>b</sub>(2); CH(4) / Me<sub>a</sub>(2).

<sup>13</sup>C NMR (75 MHz, DEPT, HMBC, CDCl<sub>3</sub>): δ 26.2 (Me<sub>a</sub>(2)), 27.1 (Me(4a)), 31.2 (Me<sub>b</sub>(2)), 36.1 (CH<sub>2</sub>(3)), 42.4 (CH(4)), 55.3 (OMe), 74.3 (C(4a)), 79.9 (C(2)), 107.5 (CH<sub>Ar</sub>(8)), 113.2 (CH<sub>Ar</sub>), 120.2 (CH<sub>Ar</sub>(6)), 125.7 (CH<sub>Ar</sub>(5)), 127.8 (C<sub>Ar</sub>(4b)), 128.7 (CH<sub>Ar</sub>(7)), 130.6 (C<sub>Ar</sub>), 130.8 (CH<sub>Ar</sub>), 155.7 (C<sub>Ar</sub>(8a)-O), 158.9 (C<sub>Ar</sub>-OMe).

HRMS (ESI): *m/z* calcd. for [C<sub>20</sub>H<sub>23</sub>NO<sub>3</sub>+H<sup>+</sup>]: 326.1751, found: 326.1756.

Anal. Calcd for C<sub>20</sub>H<sub>23</sub>NO<sub>3</sub>: C, 73.82; H, 7.12; N, 4.30. Found: C, 73.84; H, 7.25; N, 4.17.

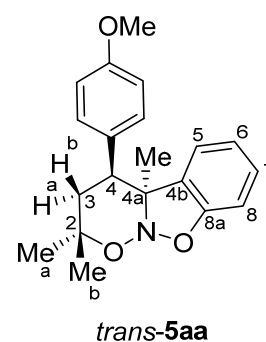

**(4S\*,4aS\*)-4-(4-Chlorophenyl)-2,2,4a-trimethyl-2,3,4,4a-tetrahydrobenzo[4,5]isoxazolo[2,3-b][1,2]oxazine (*trans*-5ba).** Nitroso acetal **5ba** was obtained from nitronate **1b** (127 mg, 0.50 mmol) and aryltriflate **9a** (121  $\mu$ L, 149 mg, 0.50 mmol) according to GP-2. Column chromatography (eluent: PE/EtOAc, 20:1) afforded 100 mg (61%) of the target nitroso acetal as pale yellow solid. Single diastereomer (*trans*-**5ba**).  $R_f$  = 0.77 (PE/EtOAc, 1:1, UV, anisaldehyde). mp = 100-103  $^{\circ}$ C (PE/MTBE, 1:1).

$^1\text{H}$  NMR (300 MHz,  $\text{CDCl}_3$ ):  $\delta$  1.43 (s, 3H,  $\text{Me}_a(2)$ ), 1.55 (s, 3H,  $\text{Me}_b(2)$ ), 1.60 (s, 3H,  $\text{Me}(4a)$ ), 1.68 (dd,  $J$  = 13.5, 2.5 Hz, 1H,  $\text{CH}_{2a}(3)$ ), 2.12 (app t,  $J$  = 13.5 Hz, 1H,  $\text{CH}_{2b}(3)$ ), 3.18 (dd,  $J$  = 13.5, 2.5 Hz, 1H,  $\text{CH}(4)$ ), 6.09 (d,  $J$  = 7.5 Hz, 1H,  $\text{CH}_{Ar}(5)$ ), 6.70 (app t,  $J$  = 7.5 Hz, 1H,  $\text{CH}_{Ar}(6)$ ), 6.80 (d,  $J$  = 8.0 Hz, 1H,  $\text{CH}_{Ar}(8)$ ), 7.02 (d,  $J$  = 8.4 Hz, 2H,  $\text{CH}_{Ar}$ ), 7.18 (app t,  $J$  = 7.7 Hz, 1H,  $\text{CH}_{Ar}(7)$ ), 7.31 (d,  $J$  = 8.4 Hz, 2H,  $\text{CH}_{Ar}$ ).

Characteristic NOESY-interactions:  $\text{Me}(4a)$  /  $\text{CH}_{Ar}$ ;  $\text{CH}(4)$  /  $\text{Me}(4a)$ ;  $\text{CH}_{2b}(3)$  /  $\text{CH}_{Ar}$ ;  $\text{CH}_{Ar}(5)$  /  $\text{CH}_{Ar}$ ;  $\text{CH}(4)$  /  $\text{CH}_{2a}(3)$ ;  $\text{CH}_{2b}(3)$  /  $\text{Me}_b(2)$ ;  $\text{CH}(4)$  /  $\text{Me}_a(2)$ .

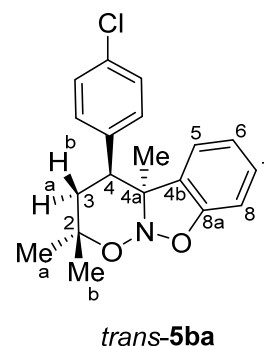

$^{13}\text{C}$  NMR (75 MHz, DEPT, HSQC, HMBC,  $\text{CDCl}_3$ ):  $\delta$  26.4 ( $\text{Me}_a(2)$ ), 26.9 ( $\text{Me}(4a)$ ), 31.3 ( $\text{Me}_b(2)$ ), 35.8 ( $\text{CH}_2(3)$ ), 42.8 ( $\text{CH}(4)$ ), 73.8 ( $\text{C}(4a)$ ), 80.1 ( $\text{C}(2)$ ), 107.6 ( $\text{CH}_{Ar}(8)$ ), 120.3 ( $\text{CH}_{Ar}(6)$ ), 125.5 ( $\text{CH}_{Ar}(5)$ ), 127.2 ( $\text{C}_{Ar}(4b)$ ), 128.0 ( $\text{CH}_{Ar}$ ), 129.0 ( $\text{CH}_{Ar}(7)$ ), 131.1 ( $\text{CH}_{Ar}$ ), 133.3 ( $\text{C}_{Ar}-\text{Cl}$ ), 137.2 ( $\text{C}_{Ar}$ ), 155.4 ( $\text{C}_{Ar}(8a)-\text{O}$ ).

HRMS (ESI):  $m/z$  calcd. for  $[\text{C}_{19}\text{H}_{20}\text{ClNO}_2+\text{H}^+]$ : 330.1255, found: 330.1256.

Anal. Calcd for  $\text{C}_{19}\text{H}_{20}\text{ClNO}_2$ : C, 69.19; H, 6.11; N, 4.25. Found: C, 68.93; H, 5.90; N, 4.25.

Crystals for X-ray diffraction analysis were obtained by crystallization from hexane – methyl *tert*-butyl ether 1:1 mixture at ca. 0 $^{\circ}$ C. The crystallographic information for compound **5ba** was deposited in the Cambridge Crystallographic Data Centre (CCDC 2237935).

**(4S\*,4aS\*)-4-(2-Bromophenyl)-2,2,4a-trimethyl-2,3,4,4a-tetrahydrobenzo[4,5]isoxazolo[2,3-b][1,2]oxazine (*trans*-5ca).** Nitroso acetal **5ca** was obtained from nitronate **1c** (100 mg, 0.34 mmol) and aryltriflate **9a** (81  $\mu$ L, 100 mg, 0.34 mmol) according to GP-2 with the following change: work up was performed with MTBE/water. Column chromatography with precooled (-30  $^{\circ}$ C) eluent (eluent: PE/EtOAc/ $\text{NEt}_3$ , 10:1:0.1) afforded 102 mg (81%) of the target nitroso acetal as white solid. Single diastereomer (*trans*-**5ca**).  $R_f$  = 0.79 (PE/EtOAc, 20:1, UV, anisaldehyde). mp = 139-140  $^{\circ}$ C (dec.) (hexane/MTBE, 1:1). Stereochemistry was assigned by analogy with other products.

$^1\text{H}$  NMR (300 MHz, COSY,  $\text{CDCl}_3$ ):  $\delta$  1.47 (s, 3H,  $\text{Me}_a(2)$ ), 1.59 (s, 3H,  $\text{Me}_b(2)$ ), 1.67 ( $\text{Me}(4a)$ ), 1.59-1.67 (m, overlapped, 1H,  $\text{CH}_{2a}(3)$ ), 2.19 (app t,  $J$  = 13.4 Hz, 1H,  $\text{CH}_{2b}(3)$ ), 3.90 (dd,  $J$  = 13.3, 2.5 Hz, 1H,  $\text{CH}(4)$ ), 6.22 (app d,  $J$  = 8.1 Hz, 1H,  $\text{CH}_{Ar}(5)$ ), 6.57-6.60 (m, 1H,  $\text{CH}_{Ar}$ ), 6.72 (app t,  $J$  = 7.8 Hz, 1H,  $\text{CH}_{Ar}(6)$ ), 6.81 (app d,  $J$  = 8.0 Hz, 1H,  $\text{CH}_{Ar}(8)$ ), 7.11-7.16 (m, 2H,  $\text{CH}_{Ar}$ ), 7.21 (app td,  $J$  = 7.8, 1.4 Hz, 1H,  $\text{CH}_{Ar}(7)$ ), 7.63-7.69 (m, 1H,  $\text{CH}_{Ar}$ ).

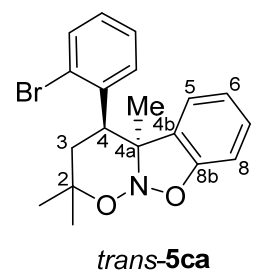

$^{13}\text{C}$  NMR (75 MHz, DEPT, HSQC, HMBC,  $\text{CDCl}_3$ ):  $\delta$  26.9 ( $\text{Me}_a(2)$ ), 27.3 ( $\text{Me}(4a)$ ), 31.3 ( $\text{Me}_b(2)$ ), 36.9 ( $\text{CH}_2(3)$ ), 40.9 ( $\text{CH}(4)$ ), 74.6 ( $\text{C}(4a)$ ), 81.2 ( $\text{C}(2)$ ), 107.5 ( $\text{CH}_{Ar}(8)$ ), 119.8 ( $\text{CH}_{Ar}(6)$ ), 126.1 ( $\text{C}_{Ar}-\text{Br}$ ), 126.4 and 126.5 ( $\text{CH}_{Ar}(5)$  and  $\text{CH}_{Ar}$ ), 127.4 ( $\text{C}_{Ar}(4b)$ ), 128.7 ( $\text{CH}_{Ar}$ ), 129.1 ( $\text{CH}_{Ar}(7)$ ), 131.9 ( $\text{CH}_{Ar}$ ), 133.0 ( $\text{CH}_{Ar}$ ), 138.3 ( $\text{C}_{Ar}$ ), 154.9 ( $\text{C}_{Ar}(8a)-\text{O}$ ).

HRMS (ESI):  $m/z$  calcd. for  $[\text{C}_{19}\text{H}_{20}\text{BrNO}_2+\text{H}^+]$ : 374.0750, found: 374.0758.

**(4*R*\*,4*aS*\*)-2,2,4,4a-Tetramethyl-2,3,4,4a-tetrahydrobenzo[4,5]isoxazolo[2,3-b][1,2]oxazine (*trans*-5da).** Nitroso acetal **5da** was obtained from nitronate **1d** (100 mg, 0.64 mmol) and aryltriflate **9a** (154  $\mu$ L, 189 mg, 0.64 mmol) according to GP-2 with the following change: work up was performed with MTBE/water. Column chromatography with precooled (-30  $^{\circ}$ C) eluent (eluent: PE/EtOAc/NEt<sub>3</sub>, 10:1:0.1) afforded 120 mg (81%) of the target nitroso acetal as pale white solid. Single diastereomer (*trans*-**5da**).  $R_f$  = 0.35 (PE/EtOAc, 10:1, UV, anisaldehyde). mp = 67-69  $^{\circ}$ C (PE/MTBE, 1:1).

<sup>1</sup>H NMR (300 MHz, CDCl<sub>3</sub>):  $\delta$  1.27-1.29 (m, 6H, Me(4) and Me(2)), 1.39 (s, overlapped, 3H, Me(2)), 1.36-1.49 (m, 2H, CH<sub>2</sub>(3)), 1.51 (s, 3H, Me(4a)), 2.19-2.32 (m, 1H, CH(4)), 6.90 (d,  $J$  = 8.1 Hz, 1H, CH<sub>Ar</sub>(8)), 6.96 (app t,  $J$  = 7.4 Hz, 1H, CH<sub>Ar</sub>(6)), 7.21-7.25 (m, 2H, CH<sub>Ar</sub>(5) and CH<sub>Ar</sub>(7)).

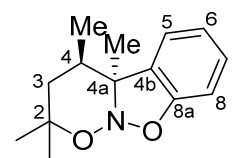

*trans*-**5da**

Characteristic NOESY-interactions: [CH<sub>Ar</sub>(5) and CH<sub>Ar</sub>(7)] / [Me(4) and Me(2)]; CH(4) / Me(4a).

<sup>13</sup>C NMR (75 MHz, DEPT, HMBC, CDCl<sub>3</sub>):  $\delta$  16.6 (Me(4) or Me(2)), 24.9 (Me(2)), 26.1 (Me(4a)), 30.3 (Me(2) or Me(4)), 32.8 (CH(4)), 39.5 (CH<sub>2</sub>(3)), 75.0 (C(4a)), 77.6 (C(2)), 108.8 (CH<sub>Ar</sub>(8)), 121.4 (CH<sub>Ar</sub>(6)), 124.3 (CH<sub>Ar</sub>(5)), 128.5 (CH<sub>Ar</sub>(7)), 129.5 (C<sub>Ar</sub>(4b)), 157.3 (C<sub>Ar</sub>(8a)-O).

HRMS (ESI):  $m/z$  calcd. for [C<sub>14</sub>H<sub>19</sub>NO<sub>2</sub>+H<sup>+</sup>]: 234.1489, found: 234.1498.

Crystals for X-ray diffraction analysis were obtained by evaporation of the compound solution in PE-EtOAc mixture (5:1). The crystallographic information for compound **5da** was deposited in the Cambridge Crystallographic Data Centre (CCDC 2240874).

**(4*S*\*,4*aS*\*)-4a-Ethyl-4-(4-methoxyphenyl)-2,2-dimethyl-2,3,4,4a-tetrahydrobenzo[4,5]isoxazolo[2,3-b][1,2]oxazine (*trans*-5ea).** Nitroso acetal **5ea** was obtained from nitronate **1e** (100 mg, 0.38 mmol) and aryltriflate **9a** (92  $\mu$ L, 113 mg, 0.38 mmol) according to GP-2. Column chromatography (eluent: PE/EtOAc, 20:1) afforded 109 mg (85%) of the target nitroso acetal as colorless oil. Single diastereomer (*trans*-**5ea**).  $R_f$  = 0.56 (PE/EtOAc, 20:1, UV, anisaldehyde).

<sup>1</sup>H NMR (300 MHz, COSY, CDCl<sub>3</sub>):  $\delta$  0.92 (t,  $J$  = 7.3 Hz, 3H, CH<sub>2</sub>CH<sub>3</sub>), 1.38 (s, 3H, Me<sub>a</sub>(2)), 1.61 (s, 3H, Me<sub>b</sub>(2)), 1.70 (dd,  $J$  = 13.5, 2.4 Hz, 1H, CH<sub>2a</sub>(3)), 1.91-2.05 (m, 2H, CH<sub>2</sub>CH<sub>3</sub>), 2.12 (app t,  $J$  = 13.6 Hz, 1H, CH<sub>2b</sub>(3)), 3.14 (dd,  $J$  = 13.6, 2.4 Hz, 1H, CH(4)), 3.85 (s, 3H, OMe), 5.90 (dd,  $J$  = 7.5, 1.0 Hz, 1H, CH<sub>Ar</sub>(5)), 6.64 (app td,  $J$  = 7.5, 1.0 Hz, 1H, CH<sub>Ar</sub>(6)), 6.75 (app d,  $J$  = 8.0 Hz, 1H, CH<sub>Ar</sub>(8)), 6.84 (d,  $J$  = 8.9 Hz, 2H, CH<sub>Ar</sub>), 6.90 (d,  $J$  = 8.9 Hz, 2H, CH<sub>Ar</sub>), 7.17 (app td,  $J$  = 7.8, 1.3 Hz, 1H, CH<sub>Ar</sub>(7)).

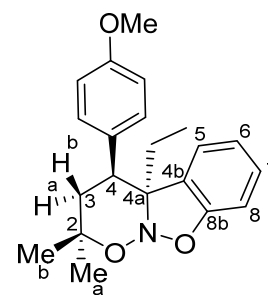

*trans*-**5ea**

Characteristic NOESY-interactions: CH(4) / CH<sub>2</sub>CH<sub>3</sub>; CH(4) / CH<sub>2</sub>CH<sub>3</sub>; CH(4) / Me<sub>a</sub>(2); CH<sub>2a</sub>(3) / Me<sub>a</sub>(2); CH(4) / CH<sub>2a</sub>(3), CH<sub>Ar</sub> / CH<sub>Ar</sub>(5); CH<sub>Ar</sub> / CH<sub>2</sub>CH<sub>3</sub>.

<sup>13</sup>C NMR (75 MHz, DEPT, HSQC, HMBC, CDCl<sub>3</sub>):  $\delta$  7.9 (CH<sub>2</sub>CH<sub>3</sub>), 27.4 (Me<sub>a</sub>(2)), 31.1 (CH<sub>2</sub>CH<sub>3</sub>), 31.7 (Me<sub>b</sub>(2)), 35.7 (CH<sub>2</sub>(3)), 39.8 (CH(4)), 55.3 (OMe), 76.9 (C(4a)), 81.1 (C(2)), 106.8 (CH<sub>Ar</sub>(8)), 113.0 (CH<sub>Ar</sub>), 119.4 (CH<sub>Ar</sub>(6)), 125.7 (C<sub>Ar</sub>(4b)), 126.3 (CH<sub>Ar</sub>(5)), 128.8 (CH<sub>Ar</sub>(7)), 130.9 (CH<sub>Ar</sub> and C<sub>Ar</sub>), 155.1 (C<sub>Ar</sub>(8a)-O), 158.8 (C<sub>Ar</sub>-OMe).

HRMS (ESI):  $m/z$  calcd. for [C<sub>21</sub>H<sub>25</sub>NO<sub>3</sub>+H<sup>+</sup>]: 340.1907, found: 340.1895.

**(4*S*\*,4*aS*\*)-4-(2-Chlorophenyl)-4*a*-ethyl-2,2-dimethyl-2,3,4,4*a*-tetrahydrobenzo[4,5]isoxazolo[2,3-*b*][1,2]oxazine (*trans*-5*fa*).** Nitroso acetal **5fa** was obtained from nitronate **1f** (100 mg, 0.37 mmol) and aryltriflate **9a** (91  $\mu$ L, 111 mg, 0.37 mmol) according to GP-2. Column chromatography (eluent: PE, then PE/EtOAc, 10:1) afforded 98 mg (76%) of the target nitroso acetal as white solid. Single diastereomer (*trans*-**5fa**).  $R_f$  = 0.75 (PE/EtOAc, 3:1, UV, anisaldehyde). mp = 140-142  $^{\circ}$ C (dec.) (PE/MTBE, 1:1).

$^1\text{H}$  NMR (300 MHz,  $\text{CDCl}_3$ ):  $\delta$  0.86 (t,  $J$  = 7.3 Hz, 3H,  $\text{CH}_2\text{CH}_3$ ), 1.43 (s, 3H,  $\text{Me}_a(2)$ ), 1.62 (s, 3H,  $\text{Me}_b(2)$ ), 1.60-1.65 (m, 1H,  $\text{CH}_{2a}(3)$ ), 1.94 (dq,  $J$  = 14.5, 7.3 Hz, 1H,  $\text{CH}_{2a}\text{CH}_3$ ), 2.09 (dq,  $J$  = 14.5, 7.3 Hz, 1H,  $\text{CH}_{2b}\text{CH}_3$ ), 2.22 (app t,  $J$  = 13.4 Hz, 1H,  $\text{CH}_{2b}(3)$ ), 3.86 (dd,  $J$  = 13.3, 2.1 Hz, 1H, CH(4)), 6.05 (dd,  $J$  = 7.5, 0.8 Hz, 1H,  $\text{CH}_{Ar}(5)$ ), 6.48 (dd,  $J$  = 7.8, 1.2 Hz, 1H,  $\text{CH}_{m-Cl}$ ), 6.68 (app td,  $J$  = 7.5, 0.8 Hz, 1H,  $\text{CH}_{Ar}(6)$ ), 6.78 (app d,  $J$  = 8.0 Hz, 1H,  $\text{CH}_{Ar}(8)$ ), 7.05 (td,  $J$  = 7.7, 1.1 Hz, 1H,  $\text{CH}_{p-Cl}$ ), 7.17-7.24 (m, 2H,  $\text{CH}_{Ar}(7)$  and  $\text{CH}_{m-Cl}$ ), 7.44 (dd,  $J$  = 8.0, 1.2 Hz, 1H,  $\text{CH}_{o-Cl}$ ).

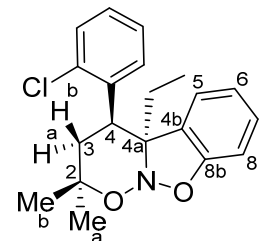

*trans*-5*fa*

Characteristic NOESY-interactions: CH(4) /  $\text{CH}_2\text{CH}_3$ ; CH(4) /  $\text{CH}_2\text{CH}_3$ ; CH(4) /  $\text{Me}_a(2)$ ;  $\text{CH}_{m-ClAr}$  /  $\text{CH}_{2b}(3)$ .

$^{13}\text{C}$  NMR (75 MHz, DEPT, HSQC, HMBC,  $\text{CDCl}_3$ ):  $\delta$  8.1 ( $\text{CH}_2\text{CH}_3$ ), 27.4 ( $\text{Me}_a(2)$ ), 31.2 ( $\text{CH}_2\text{CH}_3$ ), 31.5 ( $\text{Me}_b(2)$ ), 36.5 ( $\text{CH}_2(3)$ ), 37.1 (CH(4)), 77.5 (C(4a)), 81.6 (C(2)), 107.1 ( $\text{CH}_{Ar}(8)$ ), 119.3 ( $\text{CH}_{Ar}(6)$ ), 125.1 ( $\text{C}_{Ar}(4b)$ ), 125.7 ( $\text{CH}_{p-Cl}$ ), 126.8 ( $\text{CH}_{Ar}(5)$ ), 128.2 ( $\text{CH}_{m-Cl}$ ), 129.1 ( $\text{CH}_{Ar}(7)$ ), 129.4 ( $\text{CH}_{o-Cl}$ ), 132.0 ( $\text{CH}_{m-Cl}$ ), 135.0 (C-Cl), 136.8 ( $\text{C}_{o-Cl}$ ), 155.0 ( $\text{C}_{Ar}(8a)\text{-O}$ ).

HRMS (ESI):  $m/z$  calcd. for  $[\text{C}_{20}\text{H}_{22}\text{ClNO}_2 + \text{H}^+]$ : 344.1412, found: 344.1408.

Anal. Calcd for  $\text{C}_{20}\text{H}_{22}\text{ClNO}_2$ : C, 69.86; H, 6.45; N, 4.07. Found: C, 69.55; H, 6.50; N, 3.94.

**4*a*-Ethyl-2,2-dimethyl-2,3,4,4*a*-tetrahydrobenzo[4,5]isoxazolo[2,3-*b*][1,2]oxazin-4-yl benzoate (*cis*-5*ga* and *trans*-5*ga*).** Nitroso acetal **5ga** was obtained from nitronate **1g** (150 mg, 0.54 mmol) and aryltriflate **9a** (131  $\mu$ L, 161 mg, 0.54 mmol) according to GP-2. Column chromatography (eluent: PE/EtOAc, 100:1) afforded 28 mg (*cis*-**5ga**/*trans*-**5ga** = 90:10), 128 mg (*cis*-**5ga**/*trans*-**5ga** = 73:27), and 26 mg (*cis*-**5ga**/*trans*-**5ga** = 53:47) of target nitroso acetal mixture as colorless oils. Total yield: 182 mg (95%, *cis*-**5ga**/*trans*-**5ga** = 2.6:1).  $R_f$  = 0.30 (PE/EtOAc, 20:1, UV, anisaldehyde).

Major isomer (4*R*\*,4*aS*\*)-5*ga* (*cis*-5*ga*):

$^1\text{H}$  NMR (300 MHz, COSY,  $\text{CDCl}_3$ ):  $\delta$  0.86 (t,  $J$  = 7.5 Hz, 3H,  $\text{CH}_2\text{CH}_3$ ), 1.28 (s, 3H,  $\text{Me}_a(2)$ ), 1.56 (s, 3H,  $\text{Me}_b(2)$ ), 1.98 (dd,  $J$  = 13.4, 4.1 Hz, 1H,  $\text{CH}_{2a}(3)$ ), 2.07 (app q, overlapped,  $J$  = 7.5 Hz, 2H,  $\text{CH}_2\text{CH}_3$ ), 2.06-2.13 (m, overlapped, 1H,  $\text{CH}_{2b}(3)$ ), 5.74 (dd,  $J$  = 8.9, 4.1 Hz, 1H, CH(4)), 6.99 (app d,  $J$  = 8.0 Hz, 1H,  $\text{CH}_{Ar}(8)$ ), 7.05 (app td,  $J$  = 7.4, 0.8 Hz, 1H,  $\text{CH}_{Ar}(6)$ ), 7.21 (app td,  $J$  = 7.4, 0.8 Hz, 1H,  $\text{CH}_{Ar}(5)$ ), 7.30 (app td,  $J$  = 8.0, 1.3 Hz, 1H,  $\text{CH}_{Ar}(7)$ ), 7.54 (t,  $J$  = 7.5 Hz, 2H,  $\text{CH}_{Bz}$ ), 7.65 (app tt,  $J$  = 7.4, 1.3 Hz, 1H,  $\text{CH}_{Bz}$ ), 8.16 (app d,  $J$  = 7.1 Hz, 2H,  $\text{CH}_{Bz}$ ).

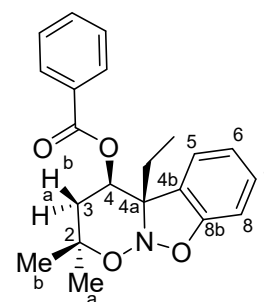

*cis*-5*ga*

Characteristic NOESY-interactions: CH(4) /  $\text{CH}_{Ar}(5)$ ;  $\text{CH}_{Bz}$  /  $\text{CH}_2\text{CH}_3$ ;  $\text{CH}_{Bz}$  /  $\text{Me}_b(2)$ ; CH(4) /  $\text{Me}_a(2)$ ;  $\text{CH}_{2a}(3)$  /  $\text{Me}_a(2)$ ;  $\text{CH}_{2b}(3)$  /  $\text{Me}_a(2)$ ; CH(4) /  $\text{CH}_2\text{CH}_3$ .

$^{13}\text{C}$  NMR (75 MHz, DEPT, HSQC, HMBC,  $\text{CDCl}_3$ ):  $\delta$  7.9 ( $\text{CH}_2\text{CH}_3$ ), 26.6 ( $\text{CH}_2\text{CH}_3$ ), 26.9 ( $\text{Me}_b(2)$ ), 28.2 ( $\text{Me}_a(2)$ ), 36.6 ( $\text{CH}_2(3)$ ), 71.1 (CH(4)), 75.2 (C(2)), 78.5 (C(4a)), 108.9 ( $\text{CH}_{Ar}(8)$ ), 122.7 ( $\text{CH}_{Ar}(6)$ ), 123.1 ( $\text{CH}_{Ar}(5)$ ), 128.7 ( $\text{CH}_{Bz}$ ), 128.8 ( $\text{C}_{Ar}(4b)$ ), 129.2 ( $\text{CH}_{Ar}(7)$ ), 129.7 ( $\text{CH}_{Bz}$ ), 129.8 ( $\text{C}_{Bz}$ ), 133.5 ( $\text{CH}_{Bz}$ ), 157.9 ( $\text{C}_{Ar}(8a)\text{-O}$ ), 165.5 (C=O).



Minor isomer (4*R*\*,4*aR*\*)-5ga (*trans*-5ga):

<sup>1</sup>H NMR (300 MHz, COSY, CDCl<sub>3</sub>): δ 0.96 (t, *J* = 7.5 Hz, 3H, CH<sub>2</sub>CH<sub>3</sub>), 1.27 (s, 3H, Me<sub>a</sub>(2)), 1.55 (s, 3H, Me<sub>b</sub>(2)), 1.83-1.91 (m, 2H, CH<sub>2</sub>CH<sub>3</sub>), 1.94-2.06 (m, 2H, CH<sub>2</sub>(3)), 5.83 (dd, *J* = 6.7, 3.8 Hz, 1H, CH(4)), 6.93-7.06 (m, 2H, CH<sub>Ar</sub>(6,8)), 7.20-7.32 (m, 2H, CH<sub>Ar</sub>(5,7)), 7.43 (t, *J* = 7.6 Hz, 2H, CH<sub>Bz</sub>), 7.54-7.61 (m, 1H, CH<sub>Bz</sub>), 7.94 (app d, *J* = 7.1 Hz, 2H, CH<sub>Bz</sub>).

Characteristic NOESY-interactions: CH<sub>Bz</sub> / Me<sub>a</sub>(2); CH(4) / Me<sub>b</sub>(2); CH(4) / CH<sub>2</sub>CH<sub>3</sub>;

<sup>13</sup>C NMR (75 MHz, DEPT, HSQC, HMBC, CDCl<sub>3</sub>): δ 8.1 (CH<sub>2</sub>CH<sub>3</sub>), 26.6 (Me<sub>b</sub>(2)), 29.3 (Me<sub>a</sub>(2)), 29.8 (CH<sub>2</sub>CH<sub>3</sub>), 36.0 (CH<sub>2</sub>(3)), 69.9 (CH(4)), 76.6 (C(2)), 79.4 (C(4a)), 108.8 (CH<sub>Ar</sub>(8)), 122.1 (CH<sub>Ar</sub>(6)), 124.9 (CH<sub>Ar</sub>(5)), 126.7 (C<sub>Ar</sub>(4b)), 128.5 (CH<sub>Bz</sub>), 128.9 (CH<sub>Ar</sub>(7)), 129.7 (CH<sub>Bz</sub>), 129.8 (C<sub>Bz</sub>), 133.3 (CH<sub>Bz</sub>), 158.2 (C<sub>Ar</sub>(8a)-O), 166.0 (C=O).

HRMS (ESI): *m/z* calcd. for [C<sub>21</sub>H<sub>23</sub>NO<sub>4</sub>+H<sup>+</sup>]: 354.1700, found: 354.1709.

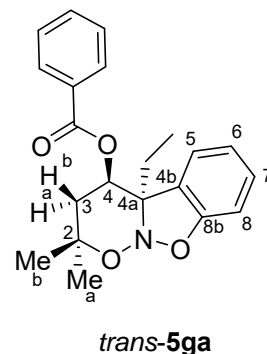

**Methyl 3-((4*S*\*,4*aS*\*)-4-(4-methoxyphenyl)-2,2-dimethyl-3,4-dihydrobenzo[4,5]isoxazolo[2,3-b][1,2]oxazin-4a(2H)-yl)propanoate (*trans*-5ha).** Nitroso acetal **5ha** was obtained from nitronate **1h** (100 mg, 0.31 mmol) and aryltriflate **9a** (76 μL, 93 mg, 0.31 mmol) according to GP-2. Column chromatography (eluent: PE/EtOAc, 10:1) afforded 120 mg (97%) of the target nitroso acetal as white solid. Single diastereomer (*trans*-5ha). *R*<sub>f</sub> = 0.75 (PE/EtOAc, 3:1, UV, anisaldehyde). mp = 90-92 °C (MeOH).

<sup>1</sup>H NMR (300 MHz, COSY, CDCl<sub>3</sub>): δ 1.37 (s, 3H, Me<sub>a</sub>(2)), 1.60 (s, 3H, Me<sub>b</sub>(2)), 1.70 (dd, *J* = 13.5, 2.4 Hz, 1H, CH<sub>2a</sub>(3)), 1.98-2.09 (m, 1H, CH<sub>2a</sub>CO<sub>2</sub>Me), 2.10 (app t, *J* = 13.5 Hz, 1H, CH<sub>2b</sub>(3)), 2.20-2.30 (m, 1H, C(4a)-CH<sub>2a</sub>), 2.33-2.43 (m, 1H, C(4a)-CH<sub>2b</sub>), 2.62 (ddd, *J* = 16.0, 10.7, 5.1 Hz, 1H, CH<sub>2b</sub>CO<sub>2</sub>Me), 3.06 (dd, *J* = 13.7, 2.4 Hz, 1H, CH(4)), 3.60 (s, 3H, CO<sub>2</sub>Me), 3.84 (s, 3H, OMe), 5.89 (d, *J* = 7.3 Hz, 1H, CH<sub>Ar</sub>(5)), 6.63 (app t, *J* = 7.5 Hz, 1H, CH<sub>Ar</sub>(6)), 6.74 (d, *J* = 8.0 Hz, 1H, CH<sub>Ar</sub>(8)), 6.83 (d, *J* = 8.9 Hz, 2H, CH<sub>Ar</sub>), 6.89 (d, *J* = 8.9 Hz, 2H, CH<sub>Ar</sub>), 7.17 (app td, *J* = 7.7, 1.0 Hz, 1H, CH<sub>Ar</sub>(7)).

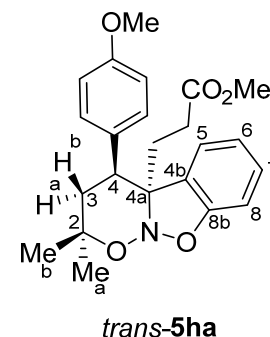

Characteristic NOESY-interactions: CH(4) / CH<sub>2b</sub>CO<sub>2</sub>Me; CH(4) / C(4a)-CH<sub>2b</sub>; CH(4) / Me<sub>a</sub>(2); CH<sub>2a</sub>(3) / Me<sub>a</sub>(2); CH<sub>2b</sub>(3) / Me<sub>b</sub>(2); CH(4) / CH<sub>2a</sub>(3); CH<sub>Ar</sub>(5) / CH<sub>Ar</sub>.

<sup>13</sup>C NMR (75 MHz, DEPT, HSQC, HMBC, CDCl<sub>3</sub>): δ 27.4 (Me<sub>a</sub>(2)), 28.7 (CH<sub>2</sub>CO<sub>2</sub>Me), 31.7 (Me<sub>b</sub>(2)), 33.1 (C(4a)-CH<sub>2</sub>), 35.5 (CH<sub>2</sub>(3)), 41.0 (CH(4)), 51.6 (CO<sub>2</sub>Me), 55.3 (OMe), 76.0 (C(4a)), 81.5 (C(2)), 106.9 (CH<sub>Ar</sub>(8)), 113.2 (CH<sub>Ar</sub>), 119.7 (CH<sub>Ar</sub>(6)), 124.3 (C<sub>Ar</sub>(4b)), 126.3 (CH<sub>Ar</sub>(5)), 129.3 (CH<sub>Ar</sub>(7)), 130.2 (C<sub>Ar</sub>), 130.8 (CH<sub>Ar</sub>), 155.0 (C<sub>Ar</sub>(8a)-O), 158.9 (C<sub>Ar</sub>-OMe), 174.0 (C=O).

HRMS (ESI): *m/z* calcd. for [C<sub>23</sub>H<sub>27</sub>NO<sub>5</sub>+H<sup>+</sup>]: 398.1962, found: 398.1955.

**4-(4-Methoxyphenyl)-4a-methyl-2-propyl-2,3,4,4a-tetrahydrobenzo[4,5]isoxazolo[2,3-b][1,2]oxazine 5ia (*trans*-5ia and *cis*-5ia).** Nitroso acetal **5ia** was obtained from nitronate **1i** (100 mg, 0.38 mmol) and aryltriflate **9a** (92 μL, 113 mg, 0.38 mmol) according to GP-2. Column chromatography (eluent: PE/EtOAc, 20:1, then 15:1) afforded 80 mg (62%) of the target nitroso acetal as yellow oil. Ratio *trans*-5ia/*cis*-5ia = 4:1 (<sup>1</sup>H NMR). *R*<sub>f</sub> = 0.78 (PE/EtOAc, 3:1, UV, anisaldehyde).

Major isomer ( $2R^*,4S^*,4aS^*$ )-**5ia** (*trans*-**5ia**):

$^1\text{H}$  NMR (300 MHz, COSY,  $\text{CDCl}_3$ ):  $\delta$  0.94 (t,  $J = 7.1$  Hz, 3H,  $\text{CH}_2\text{Me}$ ), 1.35-1.51 (m, 3H,  $\text{CH}(2)\text{-CH}_{2a}$  and  $\text{CH}_2\text{Me}$ ), 1.51 (s, 3H, Me(4a)), 1.58-1.76 (m, 2H,  $\text{CH}(2)\text{-CH}_{2b}$  and  $\text{CH}_{2a}(3)$ ), 2.06 (td,  $J = 13.4, 8.2$  Hz, 1H,  $\text{CH}_{2b}(3)$ ), 3.23 (dd,  $J = 13.6, 4.6$  Hz, 1H, CH(4)), 3.87 (s, 3H, OMe), 4.26-4.34 (m, 1H, CH(2)), 6.51 (d,  $J = 7.4$  Hz, 1H,  $\text{CH}_{Ar}(5)$ ), 6.79 (app t,  $J = 7.5$  Hz, 1H,  $\text{CH}_{Ar}(6)$ ), 6.82 (d,  $J = 8.0$  Hz, 1H,  $\text{CH}_{Ar}(8)$ ), 6.93 (d,  $J = 8.7$  Hz, 2H,  $\text{CH}_{Ar}$ ), 7.15 (d,  $J = 8.7$  Hz, 2H,  $\text{CH}_{Ar}$ ), 7.23 (app td,  $J = 7.8, 1.3$  Hz, 1H,  $\text{CH}_{Ar}(7)$ ).

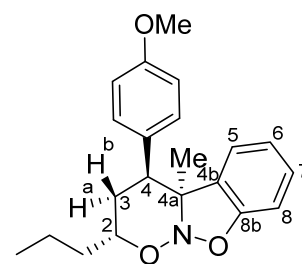

*trans*-**5ia**

Characteristic NOESY-interactions: Me(4a) /  $\text{CH}_{Ar}$ ;  $\text{CH}_{2b}(3)$  /  $\text{CH}_{Ar}$ ;  $\text{CH}_{2b}(3)$  / CH(2); CH(4) / Me(4a);  $\text{CH}_{Ar}(5)$  /  $\text{CH}_{Ar}$ .

$^{13}\text{C}$  NMR (75 MHz, DEPT, HSQC, HMBC,  $\text{CDCl}_3$ ):  $\delta$  14.0 ( $\text{CH}_2\text{Me}$ ), 18.3 ( $\text{CH}_2\text{Me}$ ), 28.3 (Me(4a)), 29.9 ( $\text{CH}_2(3)$ ), 37.1 ( $\text{CH}(2)\text{-CH}_2$ ), 40.1 (CH(4)), 55.3 (OMe), 70.8 (CH(2)), 73.8 (C(4a)), 106.4 ( $\text{CH}_{Ar}(8)$ ), 113.3 ( $\text{CH}_{Ar}$ ), 120.5 ( $\text{CH}_{Ar}(6)$ ), 125.1 ( $\text{CH}_{Ar}(5)$ ), 127.6 ( $\text{C}_{Ar}(4b)$ ), 128.9 ( $\text{CH}_{Ar}(7)$ ), 129.9 ( $\text{C}_{Ar}$ ), 131.1 ( $\text{CH}_{Ar}$ ), 156.9 ( $\text{C}_{Ar}(8a)\text{-O}$ ), 159.0 ( $\text{C}_{Ar}\text{-OMe}$ ).

Minor isomer ( $2R^*,4S^*,4aR^*$ )-**5ia** (*cis*-**5ia**):

$^1\text{H}$  NMR (300 MHz, COSY,  $\text{CDCl}_3$ ):  $\delta$  0.89 (t,  $J = 7.2$  Hz, 3H,  $\text{CH}_2\text{Me}$ ), 1.24 (s, 3H, Me(4a)), 1.31-1.49 (m, 3H,  $\text{CH}(2)\text{-CH}_{2a}$  and  $\text{CH}_2\text{Me}$ ), 1.58-1.66 (m, 2H,  $\text{CH}(2)\text{-CH}_{2b}$  and  $\text{CH}_{2a}(3)$ ), 2.25-2.33 (m, 1H,  $\text{CH}_{2b}(3)$ ), 3.62 (dd,  $J = 11.4, 3.7$  Hz, 1H, CH(4)), 3.87 (s, 3H, OMe), 4.36-4.44 (m, 1H, CH(2)), 6.95-7.06 (m, 4H,  $\text{CH}_{Ar}$ ), 7.17-7.28 (m, 2H,  $\text{CH}_{Ar}$ ), 7.41 (d,  $J = 8.7$  Hz, 2H,  $\text{CH}_{Ar}$ ).

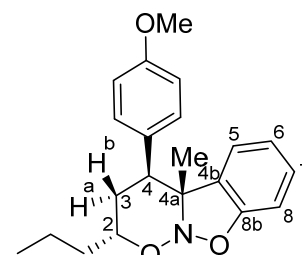

*cis*-**5ia**

Characteristic NOESY-interactions: Me(4a) /  $\text{CH}_{Ar}$ ;  $\text{CH}_{2b}(3)$  /  $\text{CH}_{Ar}$ ;  $\text{CH}_{2b}(3)$  / CH(2); CH(4) /  $\text{CH}(2)\text{-CH}_{2b}$  and  $\text{CH}_{2a}(3)$ ; CH(2) /  $\text{CH}_{Ar}$ ; Me(4a) /  $\text{CH}_{2b}(3)$ .

$^{13}\text{C}$  NMR (75 MHz, DEPT, HSQC, HMBC,  $\text{CDCl}_3$ ):  $\delta$  14.0 ( $\text{CH}_2\text{Me}$ ), 18.4 ( $\text{CH}_2\text{Me}$ ), 22.0 (Me(4a)), 32.0 ( $\text{CH}_2(3)$ ), 36.2 ( $\text{CH}(2)\text{-CH}_2$ ), 42.4 (CH(4)), 55.3 (OMe), 73.2 (CH(2)), 76.2 (C(4a)), 109.0 ( $\text{CH}_{Ar}(8)$ ), 113.8 ( $\text{CH}_{Ar}$ ), 122.6, 122.7, and 128.5 ( $\text{CH}_{Ar}(5-7)$ ), 130.9 ( $\text{CH}_{Ar}$ ), 131.9 ( $\text{C}_{Ar}$ ), 133.0 ( $\text{C}_{Ar}(4b)$ ), 157.4 ( $\text{C}_{Ar}(8a)\text{-O}$ ), 158.9 ( $\text{C}_{Ar}\text{-OMe}$ ).

HRMS (ESI):  $m/z$  calcd. for  $[\text{C}_{21}\text{H}_{25}\text{NO}_3+\text{H}^+]$ : 340.1907, found: 340.1899.

**( $2R^*,4S^*,4aS^*$ )-4-(4-Methoxyphenyl)-4a-methyl-2-phenyl-2,3,4,4a-tetrahydrobenzo[4,5]isoxazolo[2,3-b][1,2]oxazine** (*trans*-**5ja**). Nitroso acetal **5ja** was obtained from nitronate **1j** (100 mg, 0.34 mmol) and aryltriflate **9a** (82  $\mu\text{L}$ , 100 mg, 0.34 mmol) according to GP-2. Column chromatography (eluent: PE/EtOAc, 15:1, then 10:1) afforded 85 mg (68%) of the target nitroso acetal as pale yellow solid. Single diastereomer (*trans*-**5ja**).  $R_f = 0.75$  (PE/EtOAc, 3:1, UV, anisaldehyde). mp = 118-120  $^\circ\text{C}$  (PE/MTBE, 1:1).

$^1\text{H}$  NMR (300 MHz,  $\text{CDCl}_3$ ):  $\delta$  1.56 (s, 3H, Me(4a)), 2.06 (app dt,  $J = 13.1, 2.6$  Hz, 1H,  $\text{CH}_{2a}(3)$ ), 2.36 (app td,  $J = 13.1, 11.4$  Hz, 1H,  $\text{CH}_{2b}(3)_{ax}$ ), 3.64 (dd,  $J = 13.1, 3.4$  Hz, 1H,  $\text{CH}(4)_{ax}$ ), 3.90 (s, 3H, OMe), 5.09 (dd,  $J = 11.2, 2.0$  Hz, 1H,  $\text{CH}(2)_{ax}$ ), 6.76 (d,  $J = 7.1$  Hz, 1H,  $\text{CH}_{Ar}(5)$ ), 6.88 (app t,  $J = 7.3$  Hz, 1H,  $\text{CH}_{Ar}(6)$ ), 6.98-7.01 (m, 3H,  $\text{CH}_{Ar}(8)$  and  $\text{CH}_{Ar}$ ), 7.23 (app td,  $J = 7.6, 1.1$  Hz, 1H,  $\text{CH}_{Ar}(7)$ ), 7.27-7.37 (m, 5H, Ph), 7.40 (d,  $J = 8.7$  Hz, 2H,  $\text{CH}_{Ar}$ ).

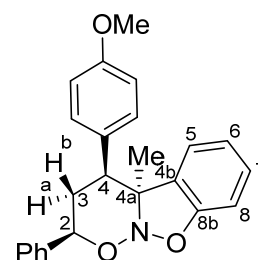

Characteristic NOESY-interactions: Me(4a) / CH<sub>Ar</sub>; CH(4) / Me(4a); CH<sub>2b</sub>(3) / CH<sub>Ar</sub>; CH<sub>2a</sub>(3) / CH(2); CH(2) / CH(4); CH<sub>Ar</sub>(5) / CH<sub>Ar</sub>.

<sup>13</sup>C NMR (75 MHz, DEPT, HSQC, HMBC, CDCl<sub>3</sub>): δ 27.2 (Me(4a)), 33.6 (CH<sub>2</sub>(3)), 46.7 (CH(4)), 55.3 (OMe), 76.2 (C(4a)), 78.4 (CH(2)), 109.4 (CH<sub>Ar</sub>(8)), 113.5 (CH<sub>Ar</sub>), 122.1 (CH<sub>Ar</sub>(6)), 124.7 (CH<sub>Ar</sub>(5)), 126.5 (CH<sub>Ph</sub>), 128.0 (CH<sub>Ph</sub>), 128.39 (CH<sub>Ph</sub>), 128.42 (CH<sub>Ar</sub>(7)), 129.4 (C<sub>Ar</sub>(4b)), 130.1 (C<sub>Ar</sub>), 131.0 (CH<sub>Ar</sub>), 139.6 (C<sub>Ph</sub>), 159.06 and 159.14 (C<sub>Ar</sub>(8a)-O and C<sub>Ar</sub>-OMe).

HRMS (ESI): *m/z* calcd. for [C<sub>24</sub>H<sub>23</sub>NO<sub>3</sub>+H<sup>+</sup>]: 374.1751, found: 374.1745.

**4-(4-Methoxyphenyl)-4a-methyl-2-phenyl-2,3,4,4a-tetrahydrobenzo[4,5]isoxazolo[2,3-b][1,2]oxazine 5ka (*trans*-5ka and *cis*-5ka).** Nitroso acetal **5ka** was obtained from nitronate **1k** (100 mg, 0.34 mmol) and aryltriflate **9a** (82 μL, 100 mg, 0.34 mmol) according to GP-2. Column chromatography (eluent: PE/EtOAc, 10:1, then 5:1, then 3:1) afforded 82 mg (65%) of the target nitroso acetal as yellow oil. Ratio *trans*-**5ka**/*cis*-**5ka** = 2.2:1 (<sup>1</sup>H NMR). R<sub>f</sub> = 0.75 (PE/EtOAc, 3:1, UV, anisaldehyde).

Major isomer (2*S*\*,4*S*\*,4*aS*\*)-**5ka** (*trans*-**5ka**):

<sup>1</sup>H NMR (300 MHz, COSY, CDCl<sub>3</sub>): δ 1.63 (s, 3H, Me(4a)), 2.12 (app dt, *J* = 13.5, 4.7 Hz, 1H, CH<sub>2a</sub>(3)), 2.46 (app td, *J* = 13.5, 9.2 Hz, 1H, CH<sub>2b</sub>(3)<sub>ax</sub>), 3.47 (dd, *J* = 13.5, 4.5 Hz, 1H, CH(4)<sub>ax</sub>), 3.88 (s, 3H, OMe), 5.39 (dd, *J* = 8.6, 5.2 Hz, 1H, CH(2)<sub>eq</sub>), 6.56 (d, *J* = 7.4 Hz, 1H, CH<sub>Ar</sub>(5)), 6.86 (app t, *J* = 7.5 Hz, 1H, CH<sub>Ar</sub>(6)), 6.90-6.93 (m, 1H, CH<sub>Ar</sub>(8)), 6.94 (d, *J* = 8.7 Hz, 2H, CH<sub>Ar</sub>), 7.18 (d, *J* = 8.7 Hz, 2H, CH<sub>Ar</sub>), 7.24-7.31 (m, 1H, CH<sub>Ar</sub>(7)), 7.34-7.47 (m, 5H, CH<sub>Ph</sub>).

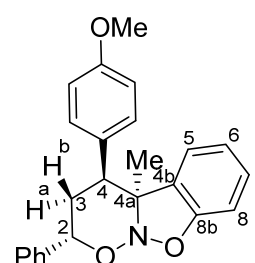

*trans*-**5ka**

Characteristic NOESY-interactions: Me(4a) / CH<sub>Ar</sub>; CH(4) / Me(4a); CH<sub>2b</sub>(3) / CH<sub>Ar</sub>; CH<sub>2b</sub>(3) / CH(2); CH<sub>Ar</sub>(5) / CH<sub>Ar</sub>; Ph / CH<sub>2a</sub>(3).

<sup>13</sup>C NMR (75 MHz, DEPT, HSQC, HMBC, CDCl<sub>3</sub>): δ 28.3 (Me(4a)), 31.4 (CH<sub>2</sub>(3)), 40.1 (CH(4)), 55.3 (OMe), 72.9 (CH(2)), 73.9 (C(4a)), 106.7 (CH<sub>Ar</sub>(8)), 113.4 (CH<sub>Ar</sub>), 120.8 (CH<sub>Ar</sub>(6)), 125.3 (CH<sub>Ar</sub>(5)), 126.5 (CH<sub>Ph</sub>), 127.4 (C<sub>Ar</sub>(4b)), 128.0 (CH<sub>Ph</sub>), 128.6 (CH<sub>Ph</sub>), 129.2 (CH<sub>Ar</sub>(7)), 129.5 (C<sub>Ar</sub>), 131.1 (CH<sub>Ar</sub>), 140.8 (C<sub>Ph</sub>), 156.8 (C<sub>Ar</sub>(8a)-O), 159.1 (C<sub>Ar</sub>-OMe).

Minor isomer (2*S*\*,4*S*\*,4*aR*\*)-**5ka** (*cis*-**5ka**):

<sup>1</sup>H NMR (300 MHz, COSY, CDCl<sub>3</sub>): δ 1.33 (s, 3H, Me(4a)), 2.07-2.16 (m, 1H, CH<sub>2a</sub>(3)), 2.50-2.69 (m, 1H, CH<sub>2b</sub>(3)), 3.85-3.90 (m, 1H, CH(4)), 3.88 (s, overlapped, 3H, OMe), 5.47 (app t, *J* = 6.0, 1H, CH(2)), 7.00 (d, *J* = 8.7 Hz, 2H, CH<sub>Ar</sub>), 7.05-7.12 (m, 2H, CH<sub>Ar</sub>(6) and CH<sub>Ar</sub>(8)), 7.25-7.37 (m, 7H, CH<sub>Ph</sub>, CH<sub>Ar</sub>(5), and CH<sub>Ar</sub>(7)), 7.51 (d, *J* = 8.7 Hz, 2H, CH<sub>Ar</sub>).

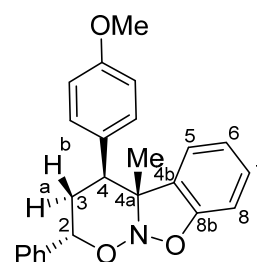

*cis*-**5ka**

<sup>13</sup>C NMR (75 MHz, DEPT, HSQC, HMBC, CDCl<sub>3</sub>): δ 22.8 (Me(4a)), 33.9 (CH<sub>2</sub>(3)), 42.8 (CH(4)), 55.3 (OMe), 74.6 (CH(2)), 76.4 (C(4a)), 109.3 (CH<sub>Ar</sub>(8)), 113.9 (CH<sub>Ar</sub>), 122.5 (CH<sub>Ar</sub>(5)), 122.9 (CH<sub>Ar</sub>(6)), 126.4 (CH<sub>Ph</sub>), 127.9 (CH<sub>Ar</sub>(7)), 128.4 (CH<sub>Ph</sub>), 130.9 (CH<sub>Ar</sub>), 131.7 (C<sub>Ar</sub>), 133.0 (C<sub>Ar</sub>(4b)), 140.2 (C<sub>Ph</sub>), 157.7 (C<sub>Ar</sub>(8a)-O), 158.9 (C<sub>Ar</sub>-OMe). One of the CH<sub>Ph</sub> cannot be unambiguously assigned due to overlapping.

HRMS (ESI): *m/z* calcd. for [C<sub>24</sub>H<sub>23</sub>NO<sub>3</sub>+H<sup>+</sup>]: 374.1751, found: 374.1746.

**(4aR\*,11bS\*,12S\*,12aR\*)-12-(4-Methoxyphenyl)-11b-methyl-1,2,3,4,4a,11b,12,12a-octahydrobenzo[e]benzo[4,5]isoxazolo[2,3-b][1,2]oxazine (*trans*-5la).** Nitroso acetal **5la** was obtained from nitronate **1l** (69 mg, 0.25 mmol) and aryltriflate **9a** (60  $\mu$ L, 75 mg, 0.25 mmol) according to GP-2 with the following change: after overnight exposure additional silane **9a** (30  $\mu$ L, 38 mg, 0.125 mmol, 0.5 equiv.) was added. After that the reaction mixture was stirred for 4 h and then worked up as described. Column chromatography (eluent: PE/EtOAc, 10:1, then 5:1) afforded 53 mg (60%) of the target nitroso acetal as pale yellow solid. Single diastereomer (*trans*-**5la**).  $R_f$  = 0.69 (PE/EtOAc, 1:1, UV, anisaldehyde). mp = 109-112  $^{\circ}$ C (PE/MTBE, 1:1).

$^1\text{H}$  NMR (300 MHz, COSY,  $\text{CDCl}_3$ ):  $\delta$  1.15-1.41 (m, 5H,  $\text{CH}_2$ ), 1.42 (s, 3H, Me(4a)), 1.56-1.68 (m, 1H,  $\text{CH}_2$ ), 1.74-1.97 (m, 2H,  $\text{CH}_2$ -CH(2)), 2.25-2.35 (m, 1H, CH(3)), 3.13 (d,  $J$  = 11.7 Hz, 1H, CH(4)), 3.88 (s, 3H, OMe), 4.31 (app q,  $J$  = 6.3 Hz, 1H, CH(2)-O), 6.70 (d,  $J$  = 7.5 Hz, 1H,  $\text{CH}_{\text{Ar}}$ (5)), 6.79-6.86 (m, 2H,  $\text{CH}_{\text{Ar}}$ (6) and  $\text{CH}_{\text{Ar}}$ (8)), 6.94 (d,  $J$  = 8.5 Hz, 2H,  $\text{CH}_{\text{Ar}}$ ), 7.17-7.22 (m, 3H,  $\text{CH}_{\text{Ar}}$  and  $\text{CH}_{\text{Ar}}$ (7)).

Characteristic NOESY-interactions: Me(4a) /  $\text{CH}_{\text{Ar}}$ ; CH(4) / Me(4a); CH(3) /  $\text{CH}_{\text{Ar}}$ ; CH(2) / CH(3); CH(4) /  $\text{CH}_2$ -CH(2); Me(4a) /  $\text{CH}_{\text{Ar}}$ (5).

$^{13}\text{C}$  NMR (75 MHz, DEPT, HSQC,  $\text{CDCl}_3$ ):  $\delta$  20.9 ( $\text{CH}_2$ ), 21.0 ( $\text{CH}_2$ ), 26.0 ( $\text{CH}_2$ ), 26.4 ( $\text{CH}_2$ ), 28.8 (Me(4a)), 33.9 (CH(3)), 47.5 (CH(4)), 55.3 (OMe), 72.6 (CH(2)), 74.2 (C(4a)), 107.0 ( $\text{CH}_{\text{Ar}}$ (8)), 113.4 ( $\text{CH}_{\text{Ar}}$ ), 120.8 ( $\text{CH}_{\text{Ar}}$ (6)), 125.0 ( $\text{CH}_{\text{Ar}}$ (5)), 128.4 ( $\text{C}_{\text{Ar}}$ (4b) or  $\text{C}_{\text{Ar}}$ ), 128.6 ( $\text{CH}_{\text{Ar}}$ (7)), 129.0 ( $\text{C}_{\text{Ar}}$  or  $\text{C}_{\text{Ar}}$ (4b)), 131.9 ( $\text{CH}_{\text{Ar}}$ ), 157.7 ( $\text{C}_{\text{Ar}}$ (8a)-O), 159.0 ( $\text{C}_{\text{Ar}}$ -OMe).

HRMS (ESI):  $m/z$  calcd. for  $[\text{C}_{22}\text{H}_{25}\text{NO}_3+\text{H}^+]$ : 352.1907, found: 352.1909.

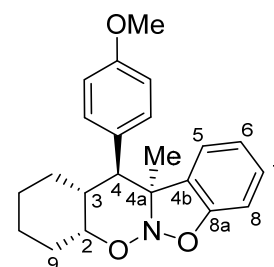

*trans*-**5la**

**10b-Methyl-11-phenyl-2,3,3a,10b,11,11a-hexahydro-1H-benzo[4,5]isoxazolo[2,3-b]cyclopenta[e][1,2]oxazine 5ma (*trans*-5ma and *cis*-5ma).** Nitroso acetal **5ma** was obtained from nitronate **1m** (200 mg, 0.86 mmol) and aryltriflate **9a** (210  $\mu$ L, 258 mg, 0.86 mmol) according to GP-2. Column chromatography (eluent: PE/EtOAc, 40:1, then 30:1, then 25:1, then 20:1) afforded 68 mg (major isomer) and 197 mg (*trans*-**5ma**/*cis*-**5ma** = 1.9:1) of target nitroso acetal as pale yellow oils. Total yield: 265 mg (99%, *trans*-**5ma**/*cis*-**5ma** = 2.9:1). Enriched minor isomer was obtained after recrystallization of second fraction from PE/MTBE, 1:1.

Major isomer (3aR\*,10bS\*,11S\*,11aR\*)-**5ma (*trans*-5ma):**

$R_f$  = 0.65 (PE/EtOAc, 10:1, UV, anisaldehyde). mp = 75-78  $^{\circ}$ C (PE/Et<sub>2</sub>O, 1:1).

$^1\text{H}$  NMR (300 MHz, COSY,  $\text{CDCl}_3$ ):  $\delta$  1.18-1.29 (m, 1H,  $\text{CH}_{2a}$ (11)), 1.33-1.41 (m, 1H,  $\text{CH}_{2a}$ (10)), 1.42 (s, 3H, Me(4a)), 1.58-1.72 (m, 2H,  $\text{CH}_{2b}$ (10) and  $\text{CH}_{2b}$ (11)), 1.78-1.83 (m, 1H,  $\text{CH}_{2a}$ (9)), 1.90-2.02 (m, 1H,  $\text{CH}_{2b}$ (9)), 2.33-2.44 (m, 1H, CH(3)), 3.05 (d,  $J$  = 12.5 Hz, 1H, CH(4)), 4.52 (td,  $J$  = 7.2, 3.6 Hz, 1H, CH(2)), 6.83-6.89 (m, 3H,  $\text{CH}_{\text{Ar}}$ (5,6,8)), 7.20-7.25 (m, 1H,  $\text{CH}_{\text{Ar}}$ (7)), 7.36-7.46 (m, 5H, Ph).

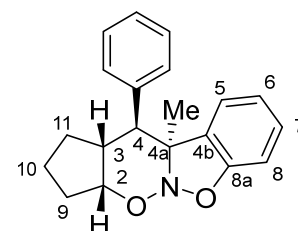

*trans*-**5ma**

Characteristic NOESY-interactions: Me(4a) / Ph; CH(4) / Me(4a); Ph / CH(3); CH(2) / CH(3).

$^{13}\text{C}$  NMR (75 MHz, DEPT, HSQC,  $\text{CDCl}_3$ ):  $\delta$  23.5 ( $\text{CH}_2$ (10)), 28.9 (Me(4a)), 31.8 ( $\text{CH}_2$ (11)), 33.2 ( $\text{CH}_2$ (9)), 39.4 (CH(3)), 47.5 (CH(4)), 73.2 (C(4a)), 75.1 (CH(2)), 106.3 ( $\text{CH}_{\text{Ar}}$ (8)), 120.8 ( $\text{CH}_{\text{Ar}}$ (6)), 124.6 ( $\text{CH}_{\text{Ar}}$ (5)), 127.6 ( $\text{CH}_{\text{Ph}}$ ), 128.1 ( $\text{CH}_{\text{Ph}}$ ), 128.3 ( $\text{C}_{\text{Ar}}$ (4b)), 128.9 ( $\text{CH}_{\text{Ar}}$ (7)), 130.8 ( $\text{CH}_{\text{Ph}}$ ), 137.2 ( $\text{C}_{\text{Ph}}$ ), 157.6 ( $\text{C}_{\text{Ar}}$ (8a)-O).

Minor isomer (3aR\*,10bR\*,11S\*,11aR\*)-**5ma** (*cis*-**5ma**):

R<sub>f</sub> = 0.60 (PE/EtOAc, 10:1, UV, anisaldehyde). mp = 122-125 °C (PE/Et<sub>2</sub>O, 1:1).

<sup>1</sup>H NMR (300 MHz, COSY, CDCl<sub>3</sub>): δ 1.04-1.15 (m, 1H, CH<sub>2a</sub>(11)), 1.34 (s, 3H, Me(4a)), 1.35-1.44 (m, 1H, CH<sub>2a</sub>(10)), 1.53-1.75 (m, 3H, CH<sub>2a</sub>(9), CH<sub>2b</sub>(10), and CH<sub>2b</sub>(11)), 1.97-2.10 (m, 1H CH<sub>2b</sub>(9)), 2.72 (app dtd, *J* = 12.6, 7.7, 4.9 Hz, 1H, CH(3)), 3.33 (d, *J* = 12.8 Hz, 1H, CH(4)), 4.77 (app q, *J* = 7.7 Hz, 1H, CH(2)), 6.94-7.04 (m, 3H, CH<sub>Ar</sub>(5,6,8)), 7.24 (app td, *J* = 7.6, 1.3 Hz, 1H, CH<sub>Ar</sub>(7)), 7.36-7.46 (m, 5H, Ph).

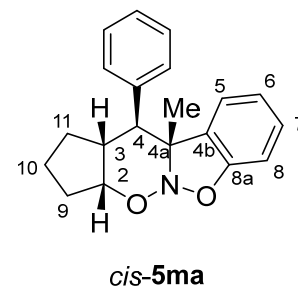

Characteristic NOESY-interactions: Me(4a) / Ph; Me(4a) / CH(3); Ph / CH(3); CH(2) / CH(3).

<sup>13</sup>C NMR (75 MHz, DEPT, HSQC, HMBC, CDCl<sub>3</sub>): δ 22.2 (Me(4a)), 22.9 (CH<sub>2</sub>(10)), 31.2 and 31.4 (CH<sub>2</sub>(9) and CH<sub>2</sub>(11)), 39.2 (CH(3)), 49.4 (CH(4)), 75.1 (C(4a)), 79.5 (CH(2)), 108.4 (CH<sub>Ar</sub>(8)), 122.6 and 123.5 (CH<sub>Ar</sub>(5) and CH<sub>Ar</sub>(6)), 127.5, 128.1, 128.3, and 128.6 (3×CH<sub>Ph</sub> and CH<sub>Ar</sub>(7)), 132.5 (C<sub>Ar</sub>(4b)), 138.0 (C<sub>Ph</sub>), 157.0 (C<sub>Ar</sub>(8a)-O).

HRMS (ESI): *m/z* calcd. for [C<sub>20</sub>H<sub>21</sub>NO<sub>2</sub>+H<sup>+</sup>]: 308.1645, found: 308.1636.

**5-Methoxy-4-(4-methoxyphenyl)-2,2,4a-trimethyl-2,3,4,4a-tetrahydrobenzo[4,5]isoxazolo[2,3-b][1,2]oxazine (*trans*-**5ab** and *cis*-**5ab**).** Nitroso acetal **5ab** was obtained from nitronate **1a** (150 mg, 0.60 mmol) and aryltriflate **9b** (198 mg, 0.60 mmol) according to GP-2. Column chromatography (eluent: PE/EtOAc, 40:1, then 20:1, then 15:1, then 10:1) afforded 76 mg (*trans*-**5ab**/*cis*-**5ab** = 14:1; <sup>1</sup>H NMR) of white solid and 110 mg (*trans*-**5ab**/*cis*-**5ab** = 1.2:1; <sup>1</sup>H NMR) of colorless oil of the target nitroso acetal. Total yield: 186 mg (87%, *trans*-**5ab**/*cis*-**5ab** = 2.5:1). Enriched major isomer was obtained by the recrystallization from PE/MTBE, 1:1.

Major isomer (4S\*,4aS\*)-**5ab** (*trans*-**5ab**):

R<sub>f</sub> = 0.74 (PE/EtOAc, 10:1, UV, anisaldehyde). mp = 139-143 °C (PE/MTBE, 1:1).

<sup>1</sup>H NMR (300 MHz, COSY, CDCl<sub>3</sub>): δ 1.39 (s, 3H, Me<sub>a</sub>(2)), 1.62 (s, 3H, Me<sub>b</sub>(2)), 1.70 (dd, *J* = 13.6, 2.5 Hz, 1H, CH<sub>2a</sub>(3)), 1.77 (s, 3H, Me(4a)), 2.33 (app t, *J* = 13.5 Hz, 1H, CH<sub>2b</sub>(3)), 2.96 (dd, *J* = 13.3, 2.5 Hz, 1H, CH(4)), 3.04 (s, 3H, OMe(5)), 3.81 (s, 3H, OMe), 6.13 (d, *J* = 8.3 Hz, 1H, CH<sub>Ar</sub>(6)), 6.39 (d, *J* = 7.9 Hz, 1H, CH<sub>Ar</sub>(8)), 6.77 (d, *J* = 8.7 Hz, 2H, CH<sub>Ar</sub>), 6.89 (d, *J* = 8.5 Hz, 2H, CH<sub>Ar</sub>), 7.11 (app t, *J* = 8.2 Hz, 1H, CH<sub>Ar</sub>(7)).

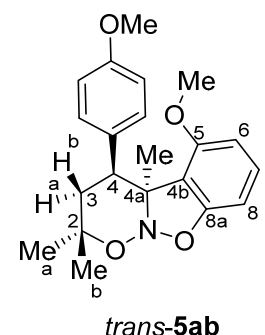

Characteristic NOESY-interactions: Me(4a) / CH<sub>Ar</sub>; CH(4) / Me(4a); CH<sub>2b</sub>(3) / CH<sub>Ar</sub>; CH<sub>2b</sub>(3) / Me<sub>b</sub>(2); CH(4) / Me<sub>a</sub>(2); OMe(5) / CH<sub>Ar</sub>(6).

<sup>13</sup>C NMR (75 MHz, DEPT, HSQC, HMBC, CDCl<sub>3</sub>): δ 24.8 (Me(4a)), 27.3 (Me<sub>a</sub>(2)), 31.7 (Me<sub>b</sub>(2)), 35.3 (CH<sub>2</sub>(3)), 43.4 (CH(4)), 54.5 (OMe(5)), 55.3 (OMe), 74.8 (C(4a)), 81.5 (C(2)), 100.3 (CH<sub>Ar</sub>(8)), 102.8 (CH<sub>Ar</sub>(6)), 112.9 (CH<sub>Ar</sub>), 113.7 (C<sub>Ar</sub>(4b)), 130.0 (CH<sub>Ar</sub>), 130.3 (CH<sub>Ar</sub>(7)), 133.2 (C<sub>Ar</sub>), 155.2 (C<sub>Ar</sub>(8a)-O), 157.0 (C<sub>Ar</sub>(5)-OMe), 158.4 (C<sub>Ar</sub>-OMe).

Minor isomer (4*S*\*,4*aR*\*)-**5ab** (*cis*-**5ab**):

R<sub>f</sub> = 0.64 (PE/EtOAc, 10:1, UV, anisaldehyde).

<sup>1</sup>H NMR (300 MHz, COSY, CDCl<sub>3</sub>): δ 1.28 (s, 3H, Me<sub>a</sub>(2)), 1.35 (s, 3H, Me(4a)), 1.55 (s, 3H, Me<sub>b</sub>(2)), 1.55-1.62 (m, 1H, CH<sub>2a</sub>(3)), 2.32 (app t, *J* = 13.6 Hz, 1H, CH<sub>2b</sub>(3)), 3.55 (dd, *J* = 13.9, 2.7 Hz, 1H, CH(4)), 3.59 (s, 3H, OMe(5)), 3.86 (s, 3H, OMe), 6.50 (d, *J* = 8.2 Hz, 1H, CH<sub>Ar</sub>(6)), 6.60 (d, *J* = 7.9 Hz, 1H, CH<sub>Ar</sub>(8)), 6.89 (d, *J* = 8.7 Hz, 2H, CH<sub>Ar</sub>), 7.19 (app t, *J* = 8.1 Hz, 1H, CH<sub>Ar</sub>(7)), 7.26 (d, *J* = 8.7 Hz, 2H, CH<sub>Ar</sub>).

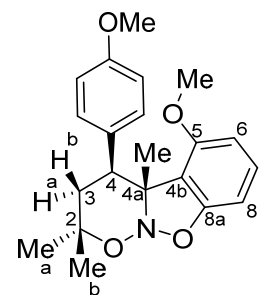

*cis*-**5ab**

Characteristic NOESY-interactions: Me(4a) / CH<sub>Ar</sub>; Me(4a) / CH<sub>2b</sub>(3); CH<sub>2b</sub>(3) / CH<sub>Ar</sub>; CH<sub>2b</sub>(3) / Me<sub>b</sub>(2); CH(4) / Me<sub>a</sub>(2); OMe(5) / CH<sub>Ar</sub>(6).

<sup>13</sup>C NMR (75 MHz, HSQC, HMBC, CDCl<sub>3</sub>): δ 18.7 (Me(4a)), 26.0 (Me<sub>a</sub>(2)), 27.4 (Me<sub>b</sub>(2)), 39.4 (CH<sub>2</sub>(3)), 42.3 (CH(4)), 54.2 (OMe(5)), 55.3 (OMe), 76.5 (C(2)), 77.7 (C(4a)), 101.9 (CH<sub>Ar</sub>(8)), 104.9 (CH<sub>Ar</sub>(6)), 112.6 (CH<sub>Ar</sub>), 119.6 (C<sub>Ar</sub>(4b)), 130.3 (overlapped, CH<sub>Ar</sub>(7)), 131.4 (CH<sub>Ar</sub>), 132.9 (C<sub>Ar</sub>), 156.0 (C(5)<sub>Ar</sub>-OMe), 158.4 and 158.6 (C<sub>Ar</sub>(8a)-O and C<sub>Ar</sub>-OMe).

HRMS (ESI): *m/z* calcd. for [C<sub>21</sub>H<sub>25</sub>NO<sub>4</sub>+H<sup>+</sup>]: 356.1856, found: 356.1857.

Anal. Calcd for C<sub>21</sub>H<sub>25</sub>NO<sub>4</sub>: C, 70.96; H, 7.09; N, 3.94. Found: C, 71.00; H, 7.28; N, 3.77.

Crystals of *cis*-**5ab** for X-ray diffraction analysis were obtained by crystallization from PE – ethyl acetate 5:1 mixture at ca. 0°C. The crystallographic information for compound *cis*-**5ab** was deposited in the Cambridge Crystallographic Data Centre (CCDC 2250122).

#### 4-(4-Methoxyphenyl)-2,2,4*a*-trimethyl-5-morpholino-2,3,4,4*a*-tetrahydrobenzo[4,5]isoxazolo[2,3-

**b][1,2]oxazine (*trans*-**5ac** and *cis*-**5ac**). Nitroso acetal **5ac** was obtained from nitronate **1a** (100 mg, 0.40 mmol) and morpholine-derived aryltriflate **9c** (154 mg, 0.40 mmol) according to GP-2. Column chromatography (eluent: PE/EtOAc, 15:1, then 10:1, then 7:1) afforded 76 mg (46%) of the target nitroso acetal (major isomer *trans*-**5ga**) as white solid and 89 mg (53%) of nitroso acetal (ratio *trans*-**5ac**/*cis*-**5ac** = 1.3:1) as colorless oil. Total: 165 mg (99%, *trans*-**5ac**/*cis*-**5ac** = 3.2:1). Enriched minor isomer was obtained by column chromatography of the second fraction (eluent: PE/EtOAc, 20:1).**

Major isomer (4*S*\*,4*aS*\*)-**5ac** (*trans*-**5ac**):

R<sub>f</sub> = 0.55 (PE/EtOAc, 3:1, UV, anisaldehyde). Mp = 159-161 °C (dec.) (PE/MTBE, 1:1).

<sup>1</sup>H NMR (300 MHz, COSY, CDCl<sub>3</sub>, 323K): δ 1.37 (br s, 3H, Me<sub>a</sub>(2)), 1.42 (s, 3H, Me<sub>b</sub>(2)), 1.71-1.83 (m, 3H, CH<sub>2ab</sub>-N and CH<sub>2a</sub>(3)), 1.86 (s, 3H, Me(4a)), 2.27 (app t, *J* = 12.1 Hz, 1H, CH<sub>2b</sub>(3)), 2.58-2.64 (m, 2H, CH<sub>2cd</sub>-N), 3.18 (app br d, *J* = 8.8 Hz, 1H, CH(4)), 3.37-3.52 (m, 4H, CH<sub>2</sub>-O), 3.79 (s, 3H, OMe), 6.63 (d, *J* = 8.1 Hz, 1H, CH<sub>Ar</sub>(6)), 6.65-6.71 (m, 3H, CH<sub>Ar</sub> and CH<sub>Ar</sub>(8)), 6.83 (br d, *J* = 8.1 Hz, 2H, CH<sub>Ar</sub>), 7.20 (app t, *J* = 8.0 Hz, 1H, CH<sub>Ar</sub>(7)).

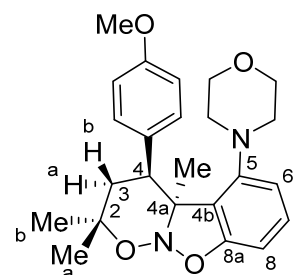

*trans*-**5ac**

Characteristic NOESY-interactions: CH(4) / Me(4a); CH<sub>2b</sub>(3) / CH<sub>Ar</sub>; CH<sub>2b</sub>(3) / Me<sub>a</sub>(2); CH(4) / Me<sub>b</sub>(2); CH<sub>2</sub>-N / CH<sub>Ar</sub>(6).

<sup>13</sup>C NMR (75 MHz, DEPT, HSQC, HMBC, CDCl<sub>3</sub>, 323K): δ 26.2 (Me(4a)), 27.3 (Me<sub>b</sub>(2)), 30.6 (br, Me<sub>a</sub>(2)), 37.3 (br, CH<sub>2</sub>(3)), 45.8 (br, CH(4)), 54.0 (CH<sub>2</sub>-N), 55.3 (OMe), 67.2 (CH<sub>2</sub>-O), 75.4 (br, C(4a)), 80.1 (br,

C(2)), 105.2 (CH<sub>Ar</sub>(8)), 113.1 (CH<sub>Ar</sub>), 115.8 (br, CH<sub>Ar</sub>(6)), 123.4 (C<sub>Ar</sub>(4b)), 130.1 (CH<sub>Ar</sub>(7)), 130.7 (CH<sub>Ar</sub>), 134.3 (br, C<sub>Ar</sub>), 151.7 (C<sub>Ar</sub>(5)-N), 156.3 (C<sub>Ar</sub>(8a)-O), 158.2 (C<sub>Ar</sub>-OMe).

HRMS (ESI): *m/z* calcd. for [C<sub>24</sub>H<sub>30</sub>N<sub>2</sub>O<sub>4</sub>+H<sup>+</sup>]: 411.2278, found: 411.2287.

Minor isomer (4*S*\*,4*aR*\*)-5ac (*cis*-5ac):

R<sub>f</sub> (minor) = 0.50 (PE/EtOAc, 3:1, UV, anisaldehyde). Mp (minor) = 137-139 °C (PE/MTBE, 1:1).

<sup>1</sup>H NMR (300 MHz, COSY, CDCl<sub>3</sub>): δ 1.44 (br s, 3H, Me<sub>a</sub>(2)), 1.61 (s, 3H, Me<sub>b</sub>(2)), 1.68 (dd, *J* = 13.7, 3.2 Hz, 1H, CH<sub>2a</sub>(3)), 1.81 (s, 3H, Me(4a)), 2.26-2.37 (m, 3H, CH<sub>2ab</sub>-N and CH<sub>2b</sub>(3)), 2.71-2.76 (m, 2H, CH<sub>2cd</sub>-N), 3.16-3.26 (m, 2H, CH<sub>2ab</sub>-O), 3.34-3.42 (m, 3H, CH<sub>2cd</sub>-O and CH(4)), 3.79 (s, 3H, OMe), 6.70 (d, *J* = 7.8 Hz, 1H) and 6.71 (d, *J* = 8.1 Hz, 1H) (CH<sub>Ar</sub>(6) and CH<sub>Ar</sub>(8)), 6.81 (d, *J* = 8.6 Hz, 1H, CH<sub>Ar</sub>), 6.95 (d, *J* = 8.6 Hz, 2H, CH<sub>Ar</sub>), 7.19 (app t, *J* = 8.0 Hz, 1H, CH<sub>Ar</sub>(7)).

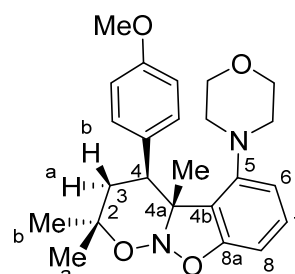

*cis*-5ac

Characteristic NOESY-interactions: Me(4a) / CH<sub>Ar</sub>; CH<sub>2</sub>-N / Me(4a); Me(4a) / [CH<sub>2</sub>O+CH(4)]; Me(4a) / [CH<sub>2</sub>-N+CH<sub>2b</sub>(3)].

<sup>13</sup>C NMR (75 MHz, DEPT, HSQC, HMBC, CDCl<sub>3</sub>): δ 16.4 (Me(4a)), 27.4 (Me<sub>b</sub>(2)), 30.3 (Me<sub>a</sub>(2)), 36.6 (CH<sub>2</sub>(3)), 40.2 (CH(4)), 54.3 (br, CH<sub>2</sub>-N), 55.3 (OMe), 66.8 (CH<sub>2</sub>-O), 71.7 (C(4a)), 79.8 (C(2)), 106.0 (CH<sub>Ar</sub>(8)), 113.5 (CH<sub>Ar</sub>), 115.0 (CH<sub>Ar</sub>(6)), 127.6 (C<sub>Ar</sub>(4b)), 129.5 (CH<sub>Ar</sub>(7)), 130.6 (CH<sub>Ar</sub>), 133.3 (C<sub>Ar</sub>), 151.0 (C<sub>Ar</sub>(5)-N), 155.2 (C<sub>Ar</sub>(8a)-O), 158.6 (C<sub>Ar</sub>-OMe).

HRMS (ESI): *m/z* calcd. for [C<sub>24</sub>H<sub>30</sub>N<sub>2</sub>O<sub>4</sub>+H<sup>+</sup>]: 411.2278, found: 411.2268.

**tert-Butyl (11*R*\*,11*aR*\*)-11-(4-methoxyphenyl)-9,9,11a-trimethyl-9,10,11,11a-tetrahydro-3H-[1,2]oxazino[2',3':2,3]isoxazolo[4,5-*e*]indole-3-carboxylate (*trans*-5ad).** Nitroso acetal **5ad** was obtained from nitronate **1a** (20 mg, 0.08 mmol) and indol-derived aryltriflate **9d** (35 mg, 0.08 mmol) according to GP-2. Column chromatography (eluent: PE/EtOAc, 20:1, then 15:1, then 10:1) afforded 21 mg (66%) of the target nitroso acetal as white solid. Single diastereomer (*trans*-5ad). R<sub>f</sub> = 0.78 (PE/EtOAc, 3:1, UV, anisaldehyde). mp = 106-108 °C (dec.) (hexane/MTBE, 1:1).

<sup>1</sup>H NMR (300 MHz, COSY, CDCl<sub>3</sub>): δ 1.41 (s, 3H, Me<sub>a</sub>(9)), 1.65 (s, 9H, Boc), 1.68 (s, 3H, Me<sub>b</sub>(9)), 1.79 (s, 3H, Me(11a)), 1.71-1.76 (m, overlapped, 1H, CH<sub>2a</sub>(10)), 2.33 (app t, *J* = 13.5 Hz, 1H, CH<sub>2b</sub>(10)), 3.06 (dd, *J* = 13.1, 1.4 Hz, 1H, CH(4)), 3.81 (s, 3H, OMe), 4.74 (d, *J* = 3.8 Hz, 1H, CH(1)), 6.67-6.79 (m, 3H, CH<sub>Ar</sub> and CH(5)), 6.82 (br m, 2H, CH<sub>Ar</sub>), 7.19 (d, *J* = 3.8 Hz, 1H, CH(2)), 8.00 (br d, *J* = 8.5 Hz, 1H, CH(4)).

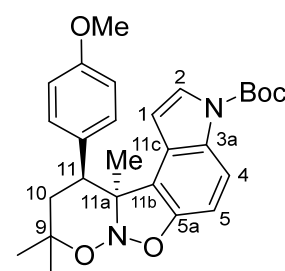

*trans*-5ad

Characteristic NOESY-interactions: Me(11a) / CH<sub>Ar</sub>; CH(11) / Me(11a); Me(11a) / CH(1); Boc / CH(2); Boc / CH(4).

<sup>13</sup>C NMR (75 MHz, DEPT, HSQC, HMBC, CDCl<sub>3</sub>): δ 26.1 (Me(11a)), 27.6 (Me(9)), 28.2 (Me<sub>Boc</sub>), 31.9 (Me(9)), 35.4 (CH<sub>2</sub>(10)), 42.6 (CH(11)), 55.5 (OMe), 75.0 (C(11a)), 81.8 (C(9)), 83.5 (C<sub>Boc</sub>), 104.3 (CH(1) and CH(5)), 113.7 (CH<sub>Ar</sub>), 115.6 (CH(4)), 117.2 (C(11b)), 126.5 (CH(2)), 128.2 (C(11c)), 130.5 (br, CH<sub>Ar</sub> and C(3a)), 131.8 (C<sub>Ar</sub>), 149.6 (C=O), 150.2 (C(5a)-O), 159.0 (C<sub>Ar</sub>-O).

HRMS (ESI): *m/z* calcd. for [C<sub>27</sub>H<sub>32</sub>N<sub>2</sub>O<sub>5</sub>+H<sup>+</sup>]: 465.2384, found: 465.2372.

**5-Methoxy-4-(4-methoxyphenyl)-2,2,4a-trimethyl-2,3,4,4a-tetrahydrobenzo[4,5]isoxazolo[2,3-b][1,2]oxazine (*trans*-5af and *cis*-5af).** Nitroso acetal **5af** was obtained from nitronate **1a** (62 mg, 0.25 mmol) and aryltriflate **9f** (83 mg, 0.25 mmol) according to GP-2. Column chromatography (eluent: PE/EtOAc, 20:1) afforded 47 mg (52 %) of the target nitroso acetal (*trans*-5af/*cis*-5af = 2.1:1;  $^1\text{H NMR}$ ) as colorless oil. Further elution (PE/EtOAc, 1:1; and then 1:4) afforded 23 mg (37%) of starting nitronate **1a**. Yield of **5af** based on reacted starting material – 83%. Enriched major isomer (*trans*-5af) was obtained from isomeric mixture by crystallization from PE/EtOAc, 10:1.

Major isomer ( $4S^*,4aS^*$ )-**5af** (*trans*-5af):

$R_f$  = 0.50 (PE/EtOAc, 10:1, UV, anisaldehyde). Mp = 126-128 °C (PE/EtOAc, 10:1).

$^1\text{H NMR}$  (300 MHz, COSY,  $\text{CDCl}_3$ ):  $\delta$  1.42 (s, 3H,  $\text{Me}_a(2)$ ), 1.57 (s, 3H,  $\text{Me}_b(2)$ ), 1.72-1.82 (m, 1H,  $\text{CH}_{2a}(3)$ ), 1.81 (s, 3H,  $\text{Me}(4a)$ ), 2.31 (app t,  $J = 13.2$  Hz, 1H,  $\text{CH}_{2b}(3)$ ), 3.03 (dd,  $J = 12.6, 2.6$  Hz, 1H, CH(4)), 3.81 (s, 3H, OMe), 6.63 (dd,  $J = 8.0, 0.7$  Hz, 1H,  $\text{CH}_{Ar}(6)$ ), 6.70 (dd,  $J = 8.0, 0.7$  Hz, 1H,  $\text{CH}_{Ar}(8)$ ), 6.75-6.87 (m, 4H,  $\text{CH}_{Ar}$ ), 7.10 (app t,  $J = 8.0$  Hz, 1H,  $\text{CH}_{Ar}(7)$ ).

Characteristic NOESY-interactions:  $\text{Me}(4a) / \text{CH}_{Ar}$ ; CH(4) /  $\text{Me}(4a)$ ;  $\text{CH}_{2b}(3) / \text{Me}_b(2)$ ; CH(4) /  $\text{Me}_a(2)$ .

$^{13}\text{C NMR}$  (75 MHz, DEPT, HSQC, HMBC,  $\text{CDCl}_3$ ):  $\delta$  24.6 ( $\text{Me}(4a)$ ), 27.3 ( $\text{Me}_a(2)$ ), 31.3 ( $\text{Me}_b(2)$ ), 35.9 ( $\text{CH}_2(3)$ ), 44.1 (CH(4)), 55.3 (OMe), 75.0 (C(4a)), 81.6 (C(2)), 106.1 ( $\text{CH}_{Ar}(8)$ ), 113.5 ( $\text{CH}_{Ar}$ ), 122.2 ( $\text{CH}_{Ar}(6)$ ), 124.5 ( $\text{C}_{Ar}(4b)$ ), 130.2 ( $\text{CH}_{Ar}(7)$ ), 130.4 (br,  $\text{CH}_{Ar}$ ), 131.5 ( $\text{C}_{Ar}$ ), 132.8 ( $\text{C}_{Ar}(5)$ ), 155.7 (C(8a) $_{Ar}$ -O), 159.0 ( $\text{C}_{Ar}$ -OMe).

Minor isomer ( $4S^*,4aR^*$ )-**5af** (*cis*-5af):

$^1\text{H NMR}$  (300 MHz, COSY,  $\text{CDCl}_3$ ):  $\delta$  1.49 (s, 3H,  $\text{Me}_a(2)$ ), 1.53 (s, 3H,  $\text{Me}_b(2)$ ), 1.62 (s, 3H,  $\text{Me}(4a)$ ), 1.68-1.73 (m, 1H,  $\text{CH}_{2a}(3)$ ), 2.33 (app t,  $J = 13.1$  Hz, 1H,  $\text{CH}_{2b}(3)$ ), 3.50 (dd,  $J = 13.6, 3.0$  Hz, 1H, CH(4)), 3.83 (s, 3H, OMe), 6.77-6.87 ( $\text{CH}_{Ar}(6)$ ,  $\text{CH}_{Ar}(8)$ , and  $\text{CH}_{Ar}$ ), 7.06 (d,  $J = 7.7$  Hz, 2H,  $\text{CH}_{Ar}$ ), 7.13 (app t,  $J = 8.0$  Hz, 1H,  $\text{CH}_{Ar}(7)$ ).

Characteristic NOESY-interactions:  $\text{Me}(4a) / \text{CH}_{Ar}$ ;  $\text{CH}_{2b}(3) / \text{CH}_{Ar}$ ;  $\text{CH}_{2b}(3) / \text{Me}_a(2)$ ; CH(4) /  $\text{Me}_b(2)$ .

$^{13}\text{C NMR}$  (75 MHz, HSQC, HMBC,  $\text{CDCl}_3$ , characteristic signals):  $\delta$  16.4 ( $\text{Me}(4a)$ ), 26.8 ( $\text{Me}_b(2)$ ), 29.3 ( $\text{Me}_a(2)$ ), 37.1 ( $\text{CH}_2(3)$ ), 40.3 (CH(4)), 55.3 (OMe), 73.9 (C(4a)), 79.2 (C(2)), 107.4 ( $\text{CH}_{Ar}(8)$ ), 113.6 ( $\text{CH}_{Ar}$ ), 122.8 ( $\text{CH}_{Ar}(6)$ ), 156.3 (C(8a) $_{Ar}$ -O), 158.8 ( $\text{C}_{Ar}$ -OMe).

HRMS (ESI):  $m/z$  calcd. for  $[\text{C}_{20}\text{H}_{22}\text{ClNO}_3+\text{H}^+]$ : 360.1361, found: 360.1355.

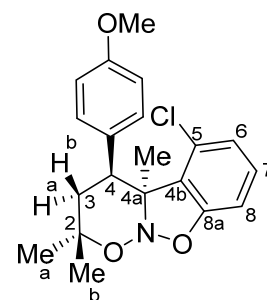

*trans*-5af

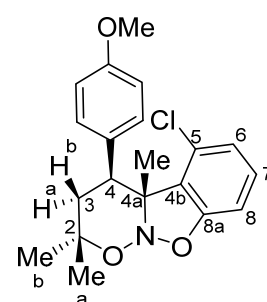

*cis*-5af



**5-Methoxy-4-(4-methoxyphenyl)-2,2,4a-trimethyl-2,3,4,4a-tetrahydrobenzo[4,5]isoxazolo[2,3-b][1,2]oxazine (*trans*-5ag and *cis*-5ag).** Nitroso acetal **5ag** was obtained from nitronate **1a** (14.7 mg, 0.059 mmol) and aryltriflate **1g** (21 mg, 0.059 mmol) according to GP-2. Column chromatography (eluent: PE, then PE/EtOAc, 10:1) afforded 9.5 mg (42 %) of *trans*-**5ag** and 4 mg (18%) of a mixture of *trans*-**5ag** and *cis*-**5ag** (d.r. 1 : 1). Further elution (PE/EtOAc, 1:1; and then 1:4) afforded 5.5 mg (37%) of starting nitronate **1a**. Overall yield of **5ag**: 60%, d.r. 5.8 : 1. Yield of **5ag** based on reacted starting material – 95%.

Major isomer (4*S*\*,4a*S*\*)-**5ag** (*trans*-**5ag**):

White solid.  $R_f$  = 0.36 (PE/EtOAc, 10:1, UV, anisaldehyde). mp = 160-162 °C.

$^1\text{H}$  NMR (300 MHz, COSY,  $\text{CDCl}_3$ ):  $\delta$  0.91 (s, 3H, Me<sub>a</sub>(2)), 1.50 (s, 3H, Me<sub>b</sub>(2)), 1.84 (dd, overlapped,  $J$  = 13.7, 4.2 Hz, 1H, CH<sub>2a</sub>(3)), 1.84 (s, 3H, Me(4a)), 2.22 (dd,  $J$  = 13.7, 4.7 Hz, 1H, CH<sub>2b</sub>(3)), 3.48 (s, 3H, CO<sub>2</sub>Me), 3.61 (app t,  $J$  = 4.3 Hz, 1H, CH(4)), 3.73 (s, 3H, OMe), 6.58 (br m, 2H, CH<sub>Ar</sub>), 6.86 (br m, 2H, CH<sub>Ar</sub>), 7.17 (dd,  $J$  = 7.2, 1.8 Hz, 1H, CH<sub>Ar</sub>(8)), 7.25-7.33 (m, 2H, CH<sub>Ar</sub>(6) and CH<sub>Ar</sub>(7)).

$^1\text{H}$  NMR (300 MHz, COSY, HSQC, HMBC, benzene-*d*<sub>6</sub>)  $\delta$  0.88 (s, 3H, Me<sub>a</sub>(2)), 1.49 (s, 3H, Me<sub>b</sub>(2)), 1.61 (dd,  $J$  = 13.8, 3.7 Hz, 1H, CH<sub>2a</sub>(3)), 1.93 (s, 3H, Me(4a)), 2.06 (dd,  $J$  = 13.8, 4.9 Hz, 1H, CH<sub>2b</sub>(3)), 3.16 (s, 3H, CO<sub>2</sub>Me), 3.19 (s, 3H, OMe), 3.63 (t,  $J$  = 4.2 Hz, 1H, CH(4)), 6.63 – 6.38 (br m, 2H, CH<sub>Ar</sub>), 6.85 – 6.79 (dd,  $J$  = 8.0, 7.5 Hz, 1H, CH<sub>Ar</sub>(7)), 6.89 (dd,  $J$  = 8.0, 1.2 Hz, 1H, CH<sub>Ar</sub>), 6.94 (d,  $J$  = 8.2 Hz, 2H, CH<sub>Ar</sub>(8)), 7.31 (dd,  $J$  = 7.5, 1.3 Hz, 1H, CH<sub>Ar</sub>(6)).

$^{13}\text{C}$  NMR (75 MHz, DEPT, HSQC, HMBC,  $\text{CDCl}_3$ ):  $\delta$  24.9 (Me(4a)), 28.0 (Me<sub>a</sub>(2) and Me<sub>b</sub>(2)), 38.3 (CH<sub>2</sub>(3)), 47.2 (CH(4)), 51.6 (CO<sub>2</sub>Me), 55.2 (OMe), 77.8 (C(2)), 78.5 (C(4a)), 112.3 (br, CH<sub>Ar</sub>), 112.5 (CH<sub>Ar</sub>(8)), 123.6 and 128.6 (CH<sub>Ar</sub>(6) and CH<sub>Ar</sub>(7)), 129.0 (C<sub>Ar</sub>(5)), 130.5 (br, C<sub>Ar</sub>(4b)), 132.0 (br, CH<sub>Ar</sub>), 133.6 (C<sub>Ar</sub>), 157.6 (C<sub>Ar</sub>-OMe), 158.3 (C(8a)<sub>Ar</sub>-O), 165.9 (CO<sub>2</sub>Me).

Characteristic NOESY-interactions (benzene-*d*<sub>6</sub>): Me<sub>a</sub>(2) / CH<sub>Ar</sub>; CH<sub>2a</sub>(3) / CH<sub>Ar</sub>; CH(4) / Me(4a); Me<sub>a</sub>(2) / CH<sub>2a</sub>(3); CH<sub>2b</sub>(3) / Me<sub>b</sub>(2).

Minor isomer (4*S*\*,4a*R*\*)-**5ag** (*cis*-**5ag**):

Characterized in a mixture with *trans*-**5ag**.

$^1\text{H}$  NMR (300 MHz,  $\text{CDCl}_3$ ):  $\delta$  1.36 (s, 3H, Me), 1.58 (s, 3H, Me), 1.55 (dd,  $J$  = 13.0, 2.9 Hz, 1H, CH<sub>2</sub>(3)), 1.78 (s, 3H, Me), 2.29 (dd,  $J$  = 13.0, 13.0 Hz, 1H, CH<sub>2</sub>(3)), 3.25 (s, 3H, OMe), 3.34 (dd,  $J$  = 13.0, 2.9 Hz, 1H, CH(4)), 3.83 (s, 3H, OMe), 6.87 (d,  $J$  = 8.8 Hz, 2H, CH<sub>Ar</sub>), 7.05 (d,  $J$  = 8.6 Hz, 2H, CH<sub>Ar</sub>), 7.10 (dd,  $J$  = 7.4, 1.6 Hz, 1H, CH<sub>Ar</sub>), 7.37 – 7.24 (m, 2H, CH<sub>Ar</sub>).

HRMS (ESI):  $m/z$  calcd. for [C<sub>22</sub>H<sub>25</sub>NO<sub>5</sub>+H<sup>+</sup>]: 384.1805, found: 384.1813.

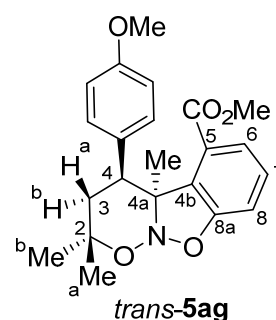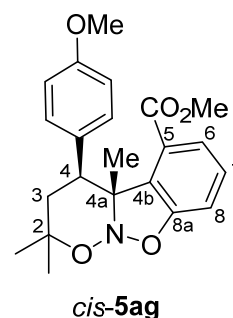

**Diethyl (3*S*\*,3a*R*\*)-3-(4-methoxyphenyl)-3a-methyl-3,3a-dihydro-2H-benzo[d]isoxazolo[2,3-b]isoxazole-2,2-dicarboxylate (*cis*-6aa).** Nitroso acetal **6aa** was obtained from nitronate **2a** (100 mg, 0.28 mmol) and aryltriflate **9a** (69  $\mu\text{L}$ , 85 mg, 0.28 mmol) according to GP-2. Column chromatography (eluent: PE/EtOAc, 20:1) afforded 85 mg (70%) of the target nitroso acetal **6aa** as white solid. Single diastereomer (*cis*-**6aa**).  $R_f$  = 0.35 (PE/EtOAc, 3:1, UV, anisaldehyde). mp = 108-109 °C (PE/MTBE, 1:1).

$^1\text{H}$  NMR (300 MHz,  $\text{CDCl}_3$ ):  $\delta$  0.85 (t,  $J = 7.1$  Hz, 3H,  $\text{CH}_2\text{CH}_3$ ), 1.04 (t,  $J = 7.1$  Hz, 3H,  $\text{CH}_2\text{CH}_3$ ), 1.25 (s, 3H, Me(3a)), 3.64-3.90 (m, 4H,  $2\times\text{CH}_2\text{CH}_3$ ), 3.83 (s, overlapped, 3H, OMe), 4.86 (s, 1H, CH(3)), 6.89-6.94 (m, 3H,  $\text{CH}_{\text{Ar}}$  and  $\text{CH}_{\text{Ar}}(7)$ ), 7.08 (app t,  $J = 7.4$  Hz, 1H,  $\text{CH}_{\text{Ar}}(5)$ ), 7.26-7.31 ( $\text{CH}_{\text{Ar}}(4)$  and  $\text{CH}_{\text{Ar}}(6)$ ), 7.40 (d,  $J = 8.7$  Hz, 2H,  $\text{CH}_{\text{Ar}}$ ).

Characteristic NOESY-interactions: Me(3a) /  $\text{CH}_{\text{Ar}}$ ; Me(3a) / CH(3); Me(3a) /  $\text{CH}_{\text{Ar}}(4)$ ; CH(3) / [ $\text{CH}_{\text{Ar}}(4)$  and  $\text{CH}_{\text{Ar}}(6)$ ].

$^{13}\text{C}$  NMR (75 MHz, DEPT,  $\text{CDCl}_3$ ):  $\delta$  13.5 ( $\text{CH}_2\text{CH}_3$ ), 13.7 ( $\text{CH}_2\text{CH}_3$ ), 22.1 (Me(3a)), 55.3 (OMe), 62.0 (CH(3)), 62.2 ( $\text{OCH}_2\text{CH}_3$ ), 62.6 ( $\text{OCH}_2\text{CH}_3$ ), 83.8 (C(3a)), 93.3 (C(2)), 108.6 ( $\text{CH}_{\text{Ar}}(7)$ ), 113.8 ( $\text{CH}_{\text{Ar}}$ ), 122.9 and 123.4 ( $\text{CH}_{\text{Ar}}(4)$  and  $\text{CH}_{\text{Ar}}(5)$ ), 126.5 (C(3b)), 129.75 ( $\text{C}_{\text{Ar}}$ ), 129.78 ( $\text{CH}_{\text{Ar}}(6)$ ), 131.2 ( $\text{CH}_{\text{Ar}}$ ), 156.3 (C(7a)-O), 159.5 ( $\text{C}_{\text{Ar}}\text{-OMe}$ ), 164.6 (C=O), 167.0 (C=O).

HRMS (ESI):  $m/z$  calcd. for  $[\text{C}_{23}\text{H}_{25}\text{NO}_7+\text{H}^+]$ : 428.1704, found: 428.1697.

Anal. Calcd for  $\text{C}_{23}\text{H}_{25}\text{NO}_7$ : C, 64.63; H, 5.90; N, 3.28. Found: C, 64.50; H, 5.98; N, 3.27.

Crystals for X-ray diffraction analysis were obtained by crystallization from hexane – methyl *tert*-butyl ether 1:1 mixture at ca.  $0^\circ\text{C}$ . The crystallographic information for compound **6aa** was deposited in the Cambridge Crystallographic Data Centre (CCDC 2237936).

**Diethyl (3*S*\*,3*aR*\*)-3-(2-fluorophenyl)-3*a*-methyl-3,3*a*-dihydro-2*H*-benzo[*d*]isoxazolo[2,3-*b*]isoxazole-2,2-dicarboxylate (*cis*-6ba).** Nitroso acetal **6ba** was obtained from nitronate **2b** (100 mg, 0.29 mmol) and aryltriflate **9a** (72  $\mu\text{L}$ , 88 mg, 0.29 mmol) according to GP-2. Column chromatography (eluent: PE/EtOAc, 10:1, then 8:1, then 6:1) afforded 93 mg (76%) of the target nitroso acetal as pale yellow solid. Single diastereomer (*cis*-**6ba**).  $R_f = 0.45$  (PE/EtOAc, 3:1, UV, anisaldehyde). mp =  $105\text{-}107^\circ\text{C}$  (PE/MTBE, 1:1).

$^1\text{H}$  NMR (300 MHz, COSY,  $\text{CDCl}_3$ ):  $\delta$  0.81 (t,  $J = 7.1$  Hz, 3H,  $\text{CH}_2\text{CH}_3$ ), 1.04 (t,  $J = 7.1$  Hz, 3H,  $\text{CH}_2\text{CH}_3$ ), 1.25 (s, 3H, Me(3a)), 3.65-3.91 (m, 4H,  $2\times\text{CH}_2\text{CH}_3$ ), 5.47 (s, 1H, CH(3)), 6.92 (d,  $J = 8.0$  Hz, 1H,  $\text{CH}_{\text{Ar}}(7)$ ), 7.07-7.21 (m, 3H,  $\text{CH}_{\text{Ar}}(5)$ ,  $\text{CH}_{\text{O-F}}$ ,  $\text{CH}_{\text{p-F}}$ ), 7.26-7.36 (m,  $\text{CH}_{\text{Ar}}(4)$ ,  $\text{CH}_{\text{Ar}}(6)$ , and  $\text{CH}_{\text{m-F}}$ ), 7.60 (app td,  $J = 7.7, 1.6$  Hz, 1H,  $\text{CH}_{\text{m-F}}$ ).

Characteristic NOESY-interactions: Me(3a) /  $\text{CH}_{\text{m-F}}$ ; Me(3a) – CH(3); Me(3a) / [ $\text{CH}_{\text{Ar}}(4)$  +  $\text{CH}_{\text{Ar}}(6)$  +  $\text{CH}_{\text{m-F}}$ ]; CH(3) / [ $\text{CH}_{\text{Ar}}(4)$  +  $\text{CH}_{\text{Ar}}(6)$  +  $\text{CH}_{\text{m-F}}$ ].

$^{13}\text{C}$  NMR (75 MHz, DEPT, HSQC, HMBC,  $\text{CDCl}_3$ ):  $\delta$  13.3 ( $\text{CH}_2\text{CH}_3$ ), 13.7 ( $\text{CH}_2\text{CH}_3$ ), 21.9 (Me(3a)), 53.0 (d,  $^3J_{\text{CF}} = 5.7$  Hz, CH(3)), 62.3 ( $\text{OCH}_2\text{CH}_3$ ), 62.8 ( $\text{OCH}_2\text{CH}_3$ ), 83.6 (C(3a)), 93.0 (C(2)), 108.5 ( $\text{CH}_{\text{Ar}}(7)$ ), 115.4 (d,  $^2J_{\text{CF}} = 22.9$  Hz,  $\text{CH}_{\text{O-F}}$ ), 122.1 (d,  $^2J_{\text{CF}} = 13.1$  Hz,  $\text{C}_{\text{O-F}}$ ), 123.0 ( $\text{CH}_{\text{Ar}}(5)$ ), 123.5 ( $\text{CH}_{\text{Ar}}(4)$ ), 124.4 (d,  $^4J_{\text{CF}} = 3.8$  Hz,  $\text{CH}_{\text{p-F}}$ ), 129.2 (C(3b)), 130.0 ( $\text{CH}_{\text{Ar}}(6)$ ), 130.1 (d,  $^3J_{\text{CF}} = 8.5$  Hz,  $\text{CH}_{\text{m-F}}$ ), 130.6 (d,  $^3J_{\text{CF}} = 2.2$  Hz,  $\text{CH}_{\text{m-F}}$ ), 156.4 (C(7a)-O), 161.0 (d,  $^1J_{\text{CF}} = 247.3$  Hz, C-F), 164.3 (C=O), 166.5 (C=O).

$^{19}\text{F}$  NMR (282 MHz,  $\text{CDCl}_3$ ):  $\delta$  -117.7-118.0 (m).

HRMS (ESI):  $m/z$  calcd. for  $[\text{C}_{22}\text{H}_{22}\text{FNO}_6+\text{H}^+]$ : 416.1504, found: 416.1506.

Anal. Calcd for  $\text{C}_{22}\text{H}_{22}\text{FNO}_6$ : C, 63.61; H, 5.34; N, 3.37. Found: C, 63.53; H, 5.43; N, 3.46.

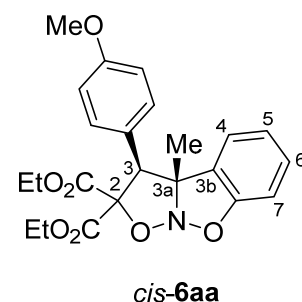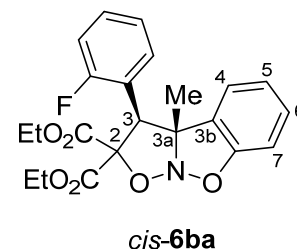

**Diethyl (3*S*\*,3*aS*\*)-3-(4-methoxyphenyl)-3*a*-phenyl-3,3*a*-dihydro-2*H*-benzo[*d*]isoxazolo[2,3-*b*]isoxazole-2,2-dicarboxylate (*cis*-**6ca**).** Nitroso acetal **6ca** was obtained from nitronate **2c** (100 mg, 0.24 mmol) and aryltriflate **9a** (59  $\mu$ L, 72 mg, 0.24 mmol) according to GP-2. Column chromatography (eluent: PE/EtOAc, 10:1, then 7:1, then 5:1) afforded 105 mg (89%) of the target nitroso acetal **6ca** as white solid and 6 mg (6%) of starting nitronate. Single diastereomer (*cis*-**6ca**).  $R_f$  = 0.26 (PE/EtOAc, 3:1, UV, anisaldehyde). mp = 142-144  $^{\circ}$ C (MeOH/CH<sub>2</sub>Cl<sub>2</sub>, 1:1).

<sup>1</sup>H NMR (300 MHz, COSY, CDCl<sub>3</sub>):  $\delta$  0.86 (t,  $J$  = 7.1 Hz, 3H, CH<sub>2</sub>CH<sub>3</sub>), 1.06 (t,  $J$  = 7.1 Hz, 3H, CH<sub>2</sub>CH<sub>3</sub>), 3.67 (s, 3H, OMe), 3.67-3.79 (m, 4H, 2 $\times$ CH<sub>2</sub>CH<sub>3</sub>), 5.44 (s, 1H, CH(3)), 6.64 (d,  $J$  = 8.8 Hz, 2H, CH<sub>Ar</sub>), 6.93 (d,  $J$  = 8.0 Hz, 1H, CH<sub>Ar</sub>(7)), 6.98-7.07 (m, 2H, CH<sub>Ar</sub>(5) and CH<sub>Ph</sub>), 7.09 (app t,  $J$  = 7.4 Hz, 2H, CH<sub>Ph</sub>), 7.21-7.27 (m, 3H, CH<sub>Ar</sub>(6) and CH<sub>Ar</sub>), 7.36 (app d,  $J$  = 7.3 Hz, 2H, CH<sub>Ph</sub>), 7.50 (d,  $J$  = 7.3 Hz, 1H, CH<sub>Ar</sub>(4)).

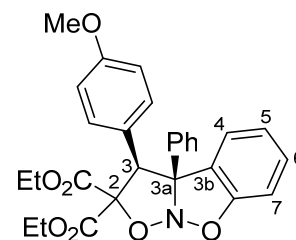

*cis*-**6ca**

Characteristic NOESY-interactions: Ph(3*a*) / CH(3); CH<sub>Ar</sub>(4) / CH(3).

<sup>13</sup>C NMR (75 MHz, DEPT, HSQC, HMBC, CDCl<sub>3</sub>):  $\delta$  13.5 (CH<sub>2</sub>CH<sub>3</sub>), 13.7 (CH<sub>2</sub>CH<sub>3</sub>), 55.0 (OMe), 62.3 (OCH<sub>2</sub>CH<sub>3</sub>), 62.6 (CH(3) and OCH<sub>2</sub>CH<sub>3</sub>), 88.5 (C(3*a*)), 93.6 (C(2)), 109.0 (CH<sub>Ar</sub>(7)), 113.2 (CH<sub>Ar</sub>), 123.1 (CH<sub>Ar</sub>(5)), 124.4 (CH<sub>Ar</sub>(4)), 125.8 (CH<sub>Ph</sub>), 126.0 (C<sub>Ar</sub>), 127.1 (CH<sub>Ph</sub>), 128.3 (CH<sub>Ph</sub>), 128.8 (C(3*b*)), 130.0 (CH<sub>Ar</sub>(6)), 131.8 (CH<sub>Ar</sub>), 138.2 (C<sub>Ph</sub>), 156.1 (C(7*a*)-O), 158.9 (C<sub>Ar</sub>-OMe), 164.6 (C=O), 167.1 (C=O).

HRMS (ESI):  $m/z$  calcd. for [C<sub>28</sub>H<sub>27</sub>NO<sub>7</sub>+H<sup>+</sup>]: 490.1860, found: 490.1856.

Crystals for X-ray diffraction analysis were obtained by crystallization from hexane – methyl *tert*-butyl ether 1:1 mixture at ca. 0 $^{\circ}$ C. The crystallographic information for compound **6ca** was deposited in the Cambridge Crystallographic Data Centre (CCDC 2237937).

**Diethyl (3*R*\*,3*aS*\*)-3*a*-chloro-3-(4-methoxyphenyl)-3,3*a*-dihydro-2*H*-benzo[*d*]isoxazolo[2,3-*b*]isoxazole-2,2-dicarboxylate (*cis*-**6da**).** Nitroso acetal **6da** was obtained from nitronate **2d** (100 mg, 0.27 mmol) and aryltriflate **9a** (65  $\mu$ L, 80 mg, 0.27 mmol) according to GP-2. Column chromatography (eluent: PE/EtOAc, 8:1, then 7:1, then 5:1) afforded 72 mg (60%) of the target nitroso acetal **6da** as yellowish oil. Single diastereomer (*cis*-**6da**).  $R_f$  = 0.29 (PE/EtOAc, 3:1, UV, anisaldehyde). mp = 127-129  $^{\circ}$ C (PE/MTBE, 1:1).

<sup>1</sup>H NMR (300 MHz, CDCl<sub>3</sub>):  $\delta$  0.87 (t,  $J$  = 7.1 Hz, 3H, CH<sub>2</sub>CH<sub>3</sub>), 1.06 (t,  $J$  = 7.1 Hz, 3H, CH<sub>2</sub>CH<sub>3</sub>), 3.72-3.89 (m, 4H, 2 $\times$ CH<sub>2</sub>CH<sub>3</sub>), 3.84 (s, overlapped, 3H, OMe), 5.16 (s, 1H, CH(3)), 6.91-6.97 (m, 3H, CH<sub>Ar</sub> and CH<sub>Ar</sub>(7)), 7.17 (app t,  $J$  = 7.4 Hz, 1H, CH<sub>Ar</sub>(5)), 7.36-7.49 (m, 4H, CH<sub>Ar</sub>(4), CH<sub>Ar</sub>(6) and CH<sub>Ar</sub>).

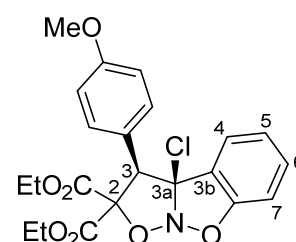

*cis*-**6da**

<sup>13</sup>C NMR (75 MHz, DEPT, CDCl<sub>3</sub>):  $\delta$  13.4 (CH<sub>2</sub>CH<sub>3</sub>), 13.7 (CH<sub>2</sub>CH<sub>3</sub>), 55.3 (OMe), 62.6 (OCH<sub>2</sub>CH<sub>3</sub>), 62.96 (CH(3)), 63.02 (OCH<sub>2</sub>CH<sub>3</sub>), 93.7 (C(2)), 101.1 (C(3*a*)-Cl), 108.9 (CH<sub>Ar</sub>(7)), 113.6 (CH<sub>Ar</sub>), 123.8 and 124.4 (CH<sub>Ar</sub>(4) and CH<sub>Ar</sub>(5)), 125.7 and 126.0 (C(3*b*) and C<sub>Ar</sub>), 131.7 (CH<sub>Ar</sub>), 131.9 (CH<sub>Ar</sub>(6)), 157.1 (C(7*a*)-O), 159.9 (C<sub>Ar</sub>-OMe), 163.5 (C=O), 166.2 (C=O).

HRMS (ESI):  $m/z$  calcd. for [C<sub>22</sub>H<sub>22</sub>ClNO<sub>7</sub>+NH<sub>4</sub><sup>+</sup>]: 465.1423, found: 465.1408.

Anal. Calcd for C<sub>22</sub>H<sub>22</sub>ClNO<sub>7</sub>: C, 59.00; H, 4.95; N, 3.13. Found: C, 58.84; H, 4.91; N, 3.15.

Crystals for X-ray diffraction analysis were obtained by crystallization from hexane – methyl *tert*-butyl ether 1:1 mixture at ca. 0°C. The crystallographic information for compound **6da** was deposited in the Cambridge Crystallographic Data Centre (CCDC 2237938).

**Diethyl (4aR\*,12bS\*)-2,3,4,4a-tetrahydrobenzo[c]benzo[4,5]isoxazolo[2,3-b]isoxazole-5,5(1H)-dicarboxylate (6ea)**. Nitroso acetal **6ea** was obtained from nitronate **2e** (156 mg, 0.55 mmol) and aryltriflate **9a** (133  $\mu$ L, 163 mg, 0.55 mmol) according to GP-2. Column chromatography (eluent: PE/EtOAc, 15:1, then 10:1, then 7:1) afforded 134 mg (68%) of target nitroso acetal as pale yellow solid. Single diastereomer.  $R_f$  = 0.50 (PE/EtOAc, 3:1, UV, anisaldehyde). mp = 120-123 °C (PE/MTBE, 1:1).

$^1\text{H}$  NMR (300 MHz, COSY,  $\text{CDCl}_3$ ):  $\delta$  0.96 (t,  $J$  = 7.1 Hz, 3H,  $\text{CH}_2\text{CH}_3$ ), 1.27 (t,  $J$  = 7.1 Hz, 3H,  $\text{CH}_2\text{CH}_3$ ), 1.35-1.48 (m, 1H,  $\text{CH}_{2a}$ ), 1.51-1.62 (m, 1H,  $\text{CH}_{2b}$ ), 1.64-1.75 (m, 3H,  $\text{CH}_{2cde}$ ), 1.85-2.01 (m, 3H,  $\text{CH}_{2fgh}$ ), 3.54 (dq,  $J$  = 10.7, 7.2 Hz, 1H,  $\text{CH}_{2a}\text{CH}_3$ ), 3.63 (dq,  $J$  = 10.7, 7.2 Hz, 1H,  $\text{CH}_{2b}\text{CH}_3$ ), 3.76 (dd,  $J$  = 12.3, 5.8 Hz, 1H, CH(3)), 4.14-4.42 (m, 2H,  $\text{CH}_{2cd}\text{CH}_3$ ), 6.91 (app d,  $J$  = 8.0 Hz, 1H,  $\text{CH}_{Ar}(7)$ ), 7.02 (app td,  $J$  = 7.5, 0.8 Hz, 1H,  $\text{CH}_{Ar}(5)$ ), 7.16 (app d,  $J$  = 7.5, 0.8 Hz, 1H,  $\text{CH}_{Ar}(4)$ ), 7.24 (app td,  $J$  = 7.7, 1.3 Hz, 1H,  $\text{CH}_{Ar}(6)$ ).

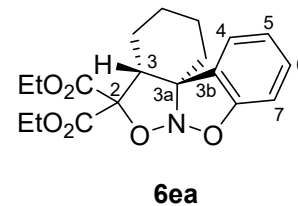

Characteristic NOESY-interactions: CH(3) /  $\text{CH}_{Ar}(4)$ .

$^{13}\text{C}$  NMR (75 MHz, DEPT, HSQC, HMBC,  $\text{CDCl}_3$ ):  $\delta$  13.7 ( $\text{CH}_2\text{CH}_3$ ), 14.1 ( $\text{CH}_2\text{CH}_3$ ), 21.8 ( $\text{CH}_2$ ), 23.5 ( $\text{CH}_2$ ), 24.7 ( $\text{CH}_2$ ), 33.0 ( $\text{CH}_2$ ), 49.8 (CH(3)), 62.2 ( $\text{OCH}_2\text{CH}_3$ ), 62.5 ( $\text{OCH}_2\text{CH}_3$ ), 81.3 (C(3a)), 92.0 (C(2)), 109.0 ( $\text{CH}_{Ar}(7)$ ), 122.7 ( $\text{CH}_{Ar}(5)$ ), 124.0 ( $\text{CH}_{Ar}(4)$ ), 129.0 (C(3b)), 129.8 ( $\text{CH}_{Ar}(6)$ ), 157.1 ( $\text{C}_{Ar}(7a)\text{-O}$ ), 165.6 (C=O), 167.2 (C=O).

HRMS (ESI):  $m/z$  calcd. for  $[\text{C}_{19}\text{H}_{23}\text{NO}_6+\text{H}^+]$ : 362.1598, found: 362.1606.

**(3S\*,3aS\*)-3-(4-Methoxyphenyl)-3a-methyl-3,3a-dihydro-2H-benzo[d]isoxazolo[2,3-b]isoxazole (*trans*-6fa)**. Nitroso acetal **6fa** was obtained from nitronate **2f** (100 mg, 0.48 mmol) and aryltriflate **9a** (117  $\mu$ L, 144 mg, 0.48 mmol) according to GP-2. Column chromatography (eluent: PE, then PE/EtOAc, 20:1) afforded 77 mg (57%) of the target nitroso acetal **6fa** as pale yellow oil. Single diastereomer (*trans*-**6fa**).  $R_f$  = 0.50 (PE/EtOAc, 3:1, UV, anisaldehyde).

$^1\text{H}$  NMR (300 MHz, COSY,  $\text{CDCl}_3$ ):  $\delta$  1.76 (s, 3H, Me(3a)), 3.71 (dd,  $J$  = 12.1, 7.0 Hz, 1H, CH(3)), 3.81 (s, 3H, OMe), 4.33 (dd,  $J$  = 12.1, 8.8 Hz, 1H,  $\text{CH}_{2a}(2)\text{-O}$ ), 4.47 (dd,  $J$  = 8.8, 7.0 Hz, 1H,  $\text{CH}_{2b}(2)\text{-O}$ ), 5.96 (dd,  $J$  = 7.6, 0.8 Hz, 1H,  $\text{CH}_{Ar}(4)$ ), 6.62 (app td,  $J$  = 7.5, 0.8 Hz, 1H,  $\text{CH}_{Ar}(5)$ ), 6.77-6.80 (m, 5H,  $\text{CH}_{Ar}$  and  $\text{CH}_{Ar}(7)$ ), 7.15 (ddd,  $J$  = 8.2, 7.4, 1.3 Hz, 1H,  $\text{CH}_{Ar}(6)$ ).

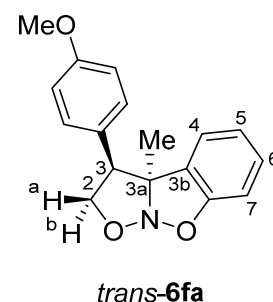

Characteristic NOESY-interactions: Me(3a) /  $\text{CH}_{Ar}$ ; Me(3a) / CH(3);  $\text{CH}_{2a}(2)$  /  $\text{CH}_{Ar}$ .

$^{13}\text{C}$  NMR (75 MHz, DEPT, HSQC, HMBC,  $\text{CDCl}_3$ ):  $\delta$  25.4 (Me(3a)), 55.3 (OMe), 58.1 (CH(3)), 73.6 ( $\text{CH}_2(2)\text{-O}$ ), 83.3 (C(3a)), 106.3 ( $\text{CH}_{Ar}(7)$ ), 113.6 ( $\text{CH}_{Ar}$ ), 120.5 ( $\text{CH}_{Ar}(5)$ ), 124.7 ( $\text{CH}_{Ar}(4)$ ), 125.1 ( $\text{C}_{Ar}$ ), 126.1 (C(3b)), 129.0 ( $\text{CH}_{Ar}(6)$ ), 129.8 ( $\text{CH}_{Ar}$ ), 156.6 (C(7a)-O), 159.2 ( $\text{C}_{Ar}\text{-OMe}$ ).

HRMS (ESI):  $m/z$  calcd. for  $[\text{C}_{17}\text{H}_{17}\text{NO}_3+\text{H}^+]$ : 284.1281, found: 284.1275.

**Ethyl (2S\*,3S\*,3aS\*)-3-(4-methoxyphenyl)-3a-methyl-3,3a-dihydro-2H-benzo[d]isoxazolo[2,3-b]isoxazole-2-carboxylate (*trans*-6ga)**. Nitroso acetal **6ga** was obtained from nitronate **1g** (100 mg, 0.36 mmol) and aryltriflate **9a** (87  $\mu$ L, 107 mg, 0.36 mmol) according to GP-2. Column chromatography

(eluent: PE/EtOAc, 15:1, then 10:1, then 8:1) afforded 42 mg (33%) of the target nitroso acetal as yellow oil. Single diastereomer (*trans*-**6ga**).  $R_f = 0.46$  (PE/EtOAc, 3:1, UV, anisaldehyde).

$^1\text{H}$  NMR (300 MHz,  $\text{CDCl}_3$ ):  $\delta$  1.15 (t,  $J = 7.1$  Hz, 3H,  $\text{CH}_2\text{CH}_3$ ), 1.77 (s, 3H, Me(3a)), 3.80 (s, 3H, OMe), 3.88 (d,  $J = 11.4$  Hz, 1H, CH(3)), 4.14 (q,  $J = 7.1$  Hz, 2H,  $\text{OCH}_2\text{CH}_3$ ), 4.98 (d,  $J = 11.4$  Hz, 1H, CH(2)), 5.97 (d,  $J = 8.2$  Hz, 1H,  $\text{CH}_{\text{Ar}}$ (4)), 6.65 (app t,  $J = 7.5$  Hz, 1H,  $\text{CH}_{\text{Ar}}$ (5)), 6.76-6.85 (m, 5H,  $\text{CH}_{\text{Ar}}$ (7) and  $\text{CH}_{\text{Ar}}$ (6)), 7.17 (app td,  $J = 7.8, 1.2$  Hz, 1H,  $\text{CH}_{\text{Ar}}$ (6)).

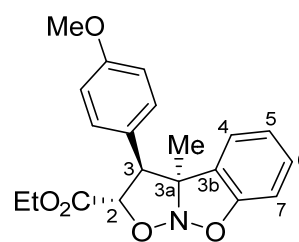

*trans*-**6ga**

$^{13}\text{C}$  NMR (75 MHz, DEPT,  $\text{CDCl}_3$ ):  $\delta$  14.0 ( $\text{CH}_2\text{CH}_3$ ), 25.0 (Me(3a)), 55.2 (OMe), 61.6 (CH(3)), 61.8 ( $\text{OCH}_2\text{CH}_3$ ), 82.3 (CH(2)), 84.2 (C(3a)), 106.8 ( $\text{CH}_{\text{Ar}}$ (7)), 113.7 ( $\text{CH}_{\text{Ar}}$ ), 121.0 ( $\text{CH}_{\text{Ar}}$ (5)), 123.8 ( $\text{C}_{\text{Ar}}$ ), 124.7 ( $\text{CH}_{\text{Ar}}$ (4)), 125.7 (C(3b)), 129.4 ( $\text{CH}_{\text{Ar}}$ (6)), 130.1 ( $\text{CH}_{\text{Ar}}$ ), 156.3 (C(7a)-O), 159.4 ( $\text{C}_{\text{Ar}}$ -OMe), 167.7 (C=O).

HRMS (ESI):  $m/z$  calcd. for  $[\text{C}_{20}\text{H}_{21}\text{NO}_5+\text{Na}^+]$ : 378.1312, found: 378.1308.

**(2*R*\*,3*R*\*,3*aR*\*)-3,3a-Dimethyl-2-phenyl-3,3a-dihydro-2H-benzo[d]isoxazolo[2,3-b]isoxazole (*trans*-**6ha**)**. Nitroso acetal **6ha** was obtained from nitronate **2h** (64 mg, 0.33 mmol) and aryltriflate **9a** (100 mg, 0.33 mmol) according to GP-2. Column chromatography (eluent: PE/EtOAc, 20:1, then 15:1) afforded 56 mg (62%) of the nitroso acetal **6ha** as yellow oil. Single diastereomer (*trans*-**6ha**).  $R_f = 0.68$  (PE/EtOAc, 3:1, UV, anisaldehyde).

$^1\text{H}$  NMR (300 MHz, COSY,  $\text{CDCl}_3$ ):  $\delta$  0.94 (d,  $J = 6.9$  Hz, 3H, Me(3)), 1.78 (s, 3H, Me(3a)), 2.48 (dq,  $J = 10.9, 6.9$  Hz, 1H, CH(3)), 4.76 (d,  $J = 10.9$  Hz, 1H, CH(2)), 6.86 (d,  $J = 8.1$  Hz, 1H,  $\text{CH}_{\text{Ar}}$ (7)), 6.99 (td,  $J = 7.5, 0.9$  Hz, 1H,  $\text{CH}_{\text{Ar}}$ (5)), 7.13 (d,  $J = 7.5, 0.9$  Hz, 1H,  $\text{CH}_{\text{Ar}}$ (4)), 7.27 (app td,  $J = 7.7, 1.3$  Hz, 1H,  $\text{CH}_{\text{Ar}}$ (6)), 7.35-7.39 (m, 5H, Ph).

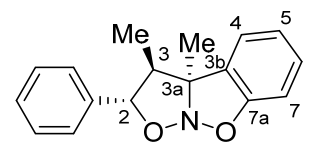

*trans*-**6ha**

Characteristic NOESY-interactions: Me(3a) / CH(3); Me(3) / CH(2); Me(3) /  $\text{CH}_{\text{Ar}}$ (4); CH(3) / Ph; Me(3) / Ph.

$^{13}\text{C}$  NMR (75 MHz, DEPT, HSQC, HMBC,  $\text{CDCl}_3$ ):  $\delta$  10.7 (Me(3)), 25.4 (Me(3a)), 54.7 (CH(3)), 83.7 (C(3a)), 89.5 (CH(2)), 107.1 ( $\text{CH}_{\text{Ar}}$ (7)), 121.0 ( $\text{CH}_{\text{Ar}}$ (5)), 124.0 ( $\text{CH}_{\text{Ar}}$ (4)), 126.5 (C(3b)), 127.1 ( $\text{CH}_{\text{Ph}}$ ), 128.7 ( $\text{CH}_{\text{Ph}}$ ), 128.9 ( $\text{CH}_{\text{Ph}}$ ), 129.2 ( $\text{CH}_{\text{Ar}}$ (6)), 135.6 ( $\text{C}_{\text{Ph}}$ ), 157.1 (C(7a)-O).

HRMS (ESI):  $m/z$  calcd. for  $[\text{C}_{17}\text{H}_{17}\text{NO}_2+\text{H}^+]$ : 268.1332, found: 268.1327.

**(2*S*\*,3*S*\*,3*aS*\*)-3-(4-Methoxyphenyl)-3a-methyl-2-phenyl-3,3a-dihydro-2H-benzo[d]isoxazolo[2,3-b]isoxazole (*trans*-**6ia**)**. Nitroso acetal **6ia** was obtained from nitronate **2i** (87 mg, 0.31 mmol) and aryltriflate **9a** (75  $\mu\text{L}$ , 92 mg, 0.31 mmol) according to GP-2. Column chromatography (eluent: PE/EtOAc, 10:1, then 8:1) afforded 66 mg (60%) of the target nitroso acetal **6ia** as pale yellow solid. Single diastereomer (*trans*-**6ia**).  $R_f = 0.52$  (PE/EtOAc, 3:1, UV, anisaldehyde). mp = 143-145  $^\circ\text{C}$  (hexane/MTBE, 1:1).

$^1\text{H}$  NMR (300 MHz, COSY,  $\text{CDCl}_3$ ):  $\delta$  1.85 (s, 3H, Me(3a)), 3.68 (d,  $J$  = 11.4 Hz, 1H, CH(3)), 3.78 (s, 3H, OMe), 5.57 (d,  $J$  = 11.4 Hz, 1H, CH(2)–O), 6.00 (d,  $J$  = 7.3 Hz, 1H,  $\text{CH}_{\text{Ar}}$ (4)), 6.67 (t,  $J$  = 7.5 Hz, 1H,  $\text{CH}_{\text{Ar}}$ (5)), 6.75 (d,  $J$  = 8.9 Hz, 2H,  $\text{CH}_{\text{Ar}}$ ), 6.81 (d,  $J$  = 8.9 Hz, 2H,  $\text{CH}_{\text{Ar}}$ ), 6.85 (app t,  $J$  = 8.1 Hz, 1H,  $\text{CH}_{\text{Ar}}$ (7)), 7.20 (app t,  $J$  = 7.7 Hz, 1H,  $\text{CH}_{\text{Ar}}$ (6)), 7.28–7.37 (m, 5H, Ph).

Characteristic NOESY-interactions: Me(3a) /  $\text{CH}_{\text{Ar}}$ ; Me(3a) / CH(3); CH(3) / Ph; CH(2) /  $\text{CH}_{\text{Ar}}$ ;  $\text{CH}_{\text{Ar}}$ (4) /  $\text{CH}_{\text{Ar}}$ .

$^{13}\text{C}$  NMR (75 MHz, DEPT, HSQC, HMBC,  $\text{CDCl}_3$ ):  $\delta$  25.9 (Me(3a)), 55.2 (OMe), 65.6 (CH(3)), 84.6 (C(3a)), 86.5 (CH(2)–O), 106.5 ( $\text{CH}_{\text{Ar}}$ (7)), 113.7 ( $\text{CH}_{\text{Ar}}$ ), 120.6 ( $\text{CH}_{\text{Ar}}$ (5)), 124.8 ( $\text{CH}_{\text{Ar}}$ (4)), 124.9 ( $\text{C}_{\text{Ar}}$ ), 126.5 (C(3b)), 127.0 ( $\text{CH}_{\text{Ph}}$ ), 128.5 ( $\text{CH}_{\text{Ph}}$ ), 128.7 ( $\text{CH}_{\text{Ph}}$ ), 129.2 ( $\text{CH}_{\text{Ar}}$ (6)), 130.2 ( $\text{CH}_{\text{Ar}}$ ), 135.2 ( $\text{C}_{\text{Ph}}$ ), 156.5 (C(7a)–O), 159.2 ( $\text{C}_{\text{Ar}}$ –OMe).

HRMS (ESI):  $m/z$  calcd. for  $[\text{C}_{23}\text{H}_{21}\text{NO}_3+\text{H}^+]$ : 360.1594, found: 360.1604.

Anal. Calcd for  $\text{C}_{23}\text{H}_{21}\text{NO}_3$ : C, 76.62; H, 5.59; N, 3.90. Found: C, 76.61; H, 5.83; N, 3.97.

Crystals for X-ray diffraction analysis were obtained by crystallization from PE – ethyl acetate 5:1 mixture at ca.  $0^\circ\text{C}$ . The crystallographic information for compound *trans*-**6ia** was deposited in the Cambridge Crystallographic Data Centre (CCDC 2250118).

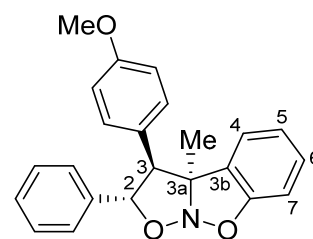

*trans*-**6ia**

**Diethyl (3*S*\*,3*aR*\*)-4-methoxy-3-(4-methoxyphenyl)-3*a*-methyl-3,3*a*-dihydro-2*H*-benzo[*d*]isoxazolo[2,3-*b*]isoxazole-2,2-dicarboxylate (*cis*-**6ab**).** Nitroso acetal **6ab** was obtained from nitronate **2a** (100 mg, 0.28 mmol) and methoxy-substituted aryltriflate **9b** (93 mg, 0.28 mmol) according to GP-2. Column chromatography (eluent: PE/EtOAc, 10:1, then 5:1, then 3:1) afforded 106 mg (81%) of the target nitroso acetal **6ab** as white solid. Single diastereomer (*cis*-**6ab**).  $R_f$  = 0.35 (PE/EtOAc, 3:1, UV, anisaldehyde). mp = 101–102 $^\circ\text{C}$  (hexane/MTBE, 1:1).

$^1\text{H}$  NMR (300 MHz,  $\text{CDCl}_3$ ):  $\delta$  0.82 (t,  $J$  = 7.1 Hz, 3H,  $\text{CH}_2\text{CH}_3$ ), 1.04 (t,  $J$  = 7.1 Hz, 3H,  $\text{CH}_2\text{CH}_3$ ), 1.25 (s, 3H, Me(3a)), 3.56–3.90 (m, 4H,  $2\times\text{CH}_2\text{CH}_3$ ), 3.81 (s, overlapped, 3H, OMe), 3.98 (m, 3H,  $\text{C}_{\text{Ar}}$ (4)–OMe), 5.21 (s, 1H, CH(3)), 6.52–6.56 (m, 2H,  $\text{CH}_{\text{Ar}}$ (5) and  $\text{CH}_{\text{Ar}}$ (7)), 6.88 (d,  $J$  = 8.7 Hz, 2H,  $\text{CH}_{\text{Ar}}$ ), 7.22 (t,  $J$  = 8.1 Hz, 1H,  $\text{CH}_{\text{Ar}}$ (6)), 7.39 (d,  $J$  = 8.7 Hz, 2H,  $\text{CH}_{\text{Ar}}$ ).

Characteristic NOESY-interactions: Me(3a) /  $\text{CH}_{\text{Ar}}$ .

$^{13}\text{C}$  NMR (75 MHz, DEPT, HSQC, HMBC,  $\text{CDCl}_3$ ):  $\delta$  13.5 ( $\text{CH}_2\text{CH}_3$ ), 13.7 ( $\text{CH}_2\text{CH}_3$ ), 19.7 (Me(3a)), 55.3 (OMe), 55.9 (OMe(4)), 59.7 (CH(3)), 62.1 ( $\text{OCH}_2\text{CH}_3$ ), 62.5 ( $\text{OCH}_2\text{CH}_3$ ), 83.7 (C(3a)), 93.4 (C(2)), 101.5 and 105.0 ( $\text{CH}_{\text{Ar}}$ (5) and  $\text{CH}_{\text{Ar}}$ (7)), 113.7 ( $\text{CH}_{\text{Ar}}$ ), 116.1 ( $\text{C}_{\text{Ar}}$ (3b)), 126.9 ( $\text{C}_{\text{Ar}}$ ), 131.3 and 131.4 ( $\text{CH}_{\text{Ar}}$ (6) and  $\text{CH}_{\text{Ar}}$ ), 155.9 ( $\text{C}_{\text{Ar}}$ (4)–OMe), 157.7 ( $\text{C}_{\text{Ar}}$ (7a)–O), 159.3 ( $\text{C}_{\text{Ar}}$ –OMe), 164.8 (C=O), 167.1 (C=O).

HRMS (ESI):  $m/z$  calcd. for  $[\text{C}_{24}\text{H}_{27}\text{NO}_8+\text{H}^+]$ : 458.1809, found: 458.1802.

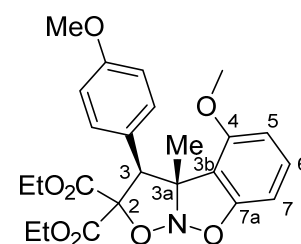

*cis*-**6ab**

## Hydrogenation of nitroso acetals **5** and **6**

### General procedure for the preparation of synthesis of aminoalcohols **7** and **8** (GP-3):

A suspension of Raney nickel (ca. 25–80 mg) in water was placed in a glass vial and washed with MeOH (3 × 2 mL). Then MeOH (0.5–1.0 mL) was added and the resulting suspension was transferred into another vial containing the solution of the corresponding nitroso acetal **5** or **6** (0.06–0.23 mmol) and Boc<sub>2</sub>O (1.5 equiv) in MeOH (the resulting concentration of nitroso acetal was ca. 0.013–0.13 M, see Supporting information). The vial was equipped with a magnetic stir bar and placed in a steel autoclave that was then flushed and filled with hydrogen to a pressure of 30 atm. The hydrogenation was conducted at the indicated temperature for 2–6 h with intense stirring. Then, the autoclave was cooled to rt and slowly depressurized. The reaction mixture was filtered through Celite and then evaporated. The residue was subjected to column chromatography on silica gel to give the target protected aminoalcohols **7** or **8**.

**tert-Butyl ((2S\*,3S\*)-5-hydroxy-2-(2-hydroxyphenyl)-3-(4-methoxyphenyl)-5-methylhexan-2-yl)carbamate (7aa).** Aminoalcohol **7aa** was obtained from nitroso acetal **5aa** (50 mg, 0.15 mmol) according to GP-3. Hydrogenation was performed over Raney nickel (~50 mg) in MeOH (1.5 mL) at 50 °C for 2 h. Column chromatography (eluent: PE/EtOAc, 3:1, then 2:1) afforded 55 mg (83%) of the target protected aminoalcohol **7aa** as white solid. *R*<sub>f</sub> = 0.18 (PE/EtOAc, 2:1, UV, anisaldehyde).

<sup>1</sup>H NMR (300 MHz, CDCl<sub>3</sub>): δ 0.78 (s, 3H, Me), 0.79 (s, 3H, Me), 1.05–1.44 (br, 1H, CH–OH), 1.18 (s, 9H, *t*-Bu), 1.59 (app d, *J* = 13.9 Hz, 1H, CH<sub>2a</sub>), 1.68 (s, 3H, N–C–Me), 1.98 (dd, *J* = 13.9, 9.8 Hz, 1H, CH<sub>2b</sub>), 3.42 (app d, *J* = 9.6 Hz, 1H, CH–Ar), 3.85 (s, 3H, OMe), 4.68 (br s, 1H, NH), 6.87–6.92 (m, 2H, CH<sub>Ar</sub>), 6.97 (d, *J* = 8.6 Hz, 2H, CH<sub>Ar</sub>), 7.16–7.21 (m, 2H, CH<sub>Ar</sub>), 7.32 (d, *J* = 8.6 Hz, 2H, CH<sub>Ar</sub>), 7.97 (br s, 1H, C<sub>Ar</sub>–OH).

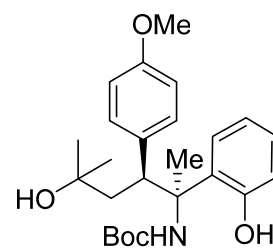

**7aa**

<sup>13</sup>C NMR (75 MHz, DEPT, CDCl<sub>3</sub>): δ 19.5 (N–C–Me), 27.8 (Me<sub>Boc</sub>), 29.0 (Me), 29.2 (Me), 43.8 (CH<sub>2</sub>), 47.0 (CH–Ar), 55.3 (OMe), 61.4 (C–N), 71.0 (Me<sub>2</sub>C–O), 80.8 (C<sub>Boc</sub>), 114.6 (CH<sub>Ar</sub>), 117.3 (CH<sub>Ar</sub>), 119.8 (CH<sub>Ar</sub>), 128.2 (CH<sub>Ar</sub>), 128.5 (CH<sub>Ar</sub>), 129.2 (C<sub>Ar</sub>), 131.4 (br, CH<sub>Ar</sub>), 131.7 (C<sub>Ar</sub>), 154.6 and 155.2 (C=O and C<sub>Ar</sub>–O), 159.2 (C<sub>Ar</sub>–O).

HRMS (ESI): *m/z* calcd. for [C<sub>25</sub>H<sub>35</sub>NO<sub>5</sub>+H<sup>+</sup>]: 430.2588, found: 430.2579.

**tert-Butyl ((2S\*,3R\*)-5-hydroxy-2-(2-hydroxyphenyl)-3,5-dimethylhexan-2-yl)carbamate (7da).** Aminoalcohol **7da** was obtained from nitroso acetal **5da** (30 mg, 0.13 mmol) according to GP-3. Hydrogenation was performed over Raney nickel (~30 mg) in MeOH (1.0 mL) at r.t. for 2 h. Column chromatography (eluent: PE/EtOAc, 3:1, then 2:1, then 1:1) afforded 38 mg (88%) of the target protected amino alcohol **7da** as white foam. *R*<sub>f</sub> = 0.28 (PE/ EtOAc, 2:1, UV, anisaldehyde).

<sup>1</sup>H NMR (300 MHz, COSY, CDCl<sub>3</sub>): δ 0.95 (s, 3H, O–C–Me), 1.02 (s, 3H, O–C–Me), 1.17 (d, overlapped, *J* = 6.7 Hz, 3H, CH–Me), 1.13–1.20 (m, 1H, CH<sub>2a</sub>), 1.29 (s, 9H, *t*-Bu), 1.43 (app d, *J* = 13.9 Hz, 1H, CH<sub>2b</sub>), 1.67 (s, 3H, N–C–Me), 2.51 (app quint, *J* = 6.8 Hz, 1H, CH–Me), 5.46 (br s, 1H, NH), 6.78 (d, *J* = 8.0 Hz, 1H, CH<sub>Ar</sub>), 6.83 (app t, *J* = 7.6 Hz, 1H, CH<sub>Ar</sub>), 7.09 (app td, *J* = 7.7, 1.4 Hz, 1H, CH<sub>Ar</sub>), 7.17 (dd, *J* = 7.8, 1.3 Hz, 1H, CH<sub>Ar</sub>), 8.05 (br s, 1H, C<sub>Ar</sub>–OH). CH–OH cannot unambiguously assigned due to broadening.

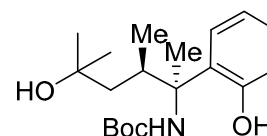

**7da**

$^{13}\text{C}$  NMR (75 MHz, DEPT, HSQC, HMBC,  $\text{CDCl}_3$ ):  $\delta$  17.7 ( $\text{CH}-\underline{\text{Me}}$ ), 19.6 ( $\text{N}-\text{C}-\underline{\text{Me}}$ ), 28.1 ( $\text{Me}_{\text{Boc}}$ ), 29.3 ( $\text{O}-\text{C}-\underline{\text{Me}}$ ), 29.5 ( $\text{O}-\text{C}-\underline{\text{Me}}$ ), 35.3 ( $\underline{\text{C}}\text{H}-\text{Me}$ ), 45.6 ( $\text{CH}_2$ ), 61.8 ( $\text{C}-\text{N}$ ), 71.3 ( $\text{Me}_2\underline{\text{C}}-\text{O}$ ), 80.1 ( $\text{C}_{\text{Boc}}$ ), 117.1 ( $\text{CH}_{\text{Ar}}$ ), 119.3 ( $\text{CH}_{\text{Ar}}$ ), 128.1 ( $\text{CH}_{\text{Ar}}$ ), 128.6 ( $\text{CH}_{\text{Ar}}$ ), 129.8 ( $\text{C}_{\text{Ar}}$ ), 154.6 ( $\text{C}_{\text{Ar}}-\text{O}$ ), 156.3 ( $\text{C}=\text{O}$ ).

HRMS (ESI):  $m/z$  calcd. for  $[\text{C}_{19}\text{H}_{31}\text{NO}_4+\text{H}^+]$ : 338.2326, found: 338.2321.

**tert-Butyl (2*S*\*,3*S*\*,5*R*\*)-5-hydroxy-2-(2-hydroxyphenyl)-3-(4-methoxyphenyl)-5-phenylpentan-2-ylcarbamate (7ja).** Aminoalcohol **7ja** was obtained from nitroso acetal **5ja** (25.0 mg, 0.067 mmol) according to GP-3. Hydrogenation was performed over Raney nickel (~25 mg) in MeOH (5 mL) at 50 °C for 2 h. Column chromatography (eluent: PE/EtOAc, 1:1, then 1:2, then EtOAc) afforded 18.5 mg (58%) of target protected aminoalcohol **7ja** as colorless oil.  $R_f$  = 0.58 (PE/EtOAc, 1:1, UV, anisaldehyde).

$^1\text{H}$  NMR (300 MHz, COSY,  $\text{CDCl}_3$ ):  $\delta$  1.23 (s, 9H, *t*-Bu), 1.70 (s, 3H, Me), 1.72-1.84 (m, 1H,  $\text{CH}_{2a}$ ), 1.95-2.07 (m, 1H,  $\text{CH}_{2b}$ ), 3.75 (dd,  $J$  = 11.7, 2.1 Hz, 1H,  $\underline{\text{C}}\text{H}-\text{Ar}$ ), 3.87 (s, 3H, OMe), 4.09-4.17 (m, 1H,  $\underline{\text{C}}\text{H}-\text{OH}$ ), 4.74 (br s, 1H, NH), 6.84-6.93 (m, 2H,  $\text{CH}_{\text{Ar}}$ ), 6.98 (d,  $J$  = 8.6 Hz, 2H,  $\text{CH}_{\text{Ar}}$ ), 7.03-7.08 (m, 2H,  $\text{CH}_{\text{Ar}}$ ), 7.11 (app d,  $J$  = 7.7 Hz, 1H,  $\text{CH}_{\text{Ar}}$ ), 7.17-7.27 (m, 6H,  $\text{CH}_{\text{Ar}}$ ), 7.93 (br s, 1H,  $\text{C}_{\text{Ar}}-\text{OH}$ ).  $\text{CH}-\text{OH}$  cannot unambiguously assigned due to broadening.

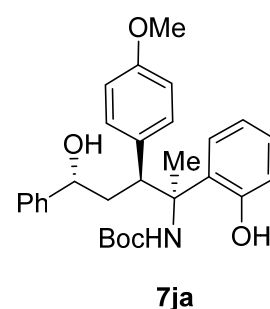

$^{13}\text{C}$  NMR (75 MHz, DEPT, HSQC, HMBC,  $\text{CDCl}_3$ ):  $\delta$  20.3 ( $\text{N}-\text{C}-\text{Me}$ ), 27.9 ( $\text{Me}_{\text{Boc}}$ ), 40.1 ( $\text{CH}_2$ ), 48.4 ( $\underline{\text{C}}\text{H}-\text{Ar}$ ), 55.3 (OMe), 61.2 ( $\text{C}-\text{N}$ ), 71.7 ( $\text{CH}-\text{O}$ ), 80.8 ( $\text{C}_{\text{Boc}}$ ), 114.5 ( $\text{CH}_{\text{Ar}}$ ), 117.5 ( $\text{CH}_{\text{Ar}}$ ), 119.8 ( $\text{CH}_{\text{Ar}}$ ), 125.4 ( $\text{CH}_{\text{Ar}}$ ), 127.3 ( $\text{CH}_{\text{Ar}}$ ), 128.1 ( $\text{CH}_{\text{Ar}}$ ), 128.4 ( $\text{CH}_{\text{Ar}}$ ), 128.6 ( $\text{CH}_{\text{Ar}}$ ), 129.0 ( $\text{N}-\text{C}-\underline{\text{C}}_{\text{Ar}}$ ), 130.1 ( $\text{CH}-\underline{\text{C}}_{\text{Ar}}$ ), 131.5 (br,  $\text{CH}_{\text{Ar}}$ ), 144.9 ( $\text{C}_{\text{Ar}}$ ), 154.6 ( $\underline{\text{C}}_{\text{Ar}}-\text{OH}$ ), 155.3 ( $\text{C}=\text{O}$ ), 159.2 ( $\underline{\text{C}}_{\text{Ar}}-\text{OMe}$ ).

HRMS (ESI):  $m/z$  calcd. for  $[\text{C}_{29}\text{H}_{35}\text{NO}_5+\text{Na}^+]$ : 500.2407, found: 500.2406.

**tert-Butyl ((1*S*\*,2*S*\*)-1-((1*R*\*,2*R*\*)-2-hydroxycyclohexyl)-2-(2-hydroxyphenyl)-1-(4-methoxyphenyl)propan-2-yl)carbamate (7la).** Aminoalcohol **7la** was obtained from nitroso acetal **5la** (42 mg, 0.12 mmol) according to GP-3. Hydrogenation was performed over Raney nickel (~40 mg) in MeOH (1.5 mL) at 50 °C for 2 h. Column chromatography (eluent: PE, then PE/EtOAc, 10:1, then 5:1, then 3:1) afforded 33 mg (60%) of target protected aminoalcohol **7la** as colorless oil.  $R_f$  = 0.29 (PE/EtOAc, 3:1, UV, anisaldehyde). mp = 127-128 °C (dec.) (PE/MeCN/ $\text{CHCl}_3$ , 1:1:0.1).

$^1\text{H}$  NMR (300 MHz, COSY,  $\text{CDCl}_3$ ):  $\delta$  0.59 (d,  $J$  = 4.5 Hz, 1H,  $\text{CHOH}$ ), 1.05-1.44 (m, 6H,  $\text{CH}_2$ ), 1.18 (s, overlapped, 9H, *t*-Bu), 1.51-1.64 (m, 2H,  $\text{CH}_2$ ), 1.77-1.86 (m, 1H, CH), 1.93 (s, 3H, Me), 3.60-3.62 (m, 2H,  $\underline{\text{C}}\text{H}\text{OH}$  and  $\underline{\text{C}}\text{H}-\text{Ar}$ ), 3.85 (s, 3H, OMe), 4.64 (br s, 1H, NH), 6.89-6.96 (m, 4H,  $\text{CH}_{\text{Ar}}$ ), 7.22 (app t,  $J$  = 7.6 Hz, 1H,  $\text{CH}_{\text{Ar}}$ ), 7.30 (d,  $J$  = 8.0 Hz, 2H,  $\text{CH}_{\text{Ar}}$ ), 7.36 (app d,  $J$  = 7.8 Hz, 1H,  $\text{CH}_{\text{Ar}}$ ), 7.87 (br s, 1H,  $\text{C}_{\text{Ar}}-\text{OH}$ ).

$^{13}\text{C}$  NMR (75 MHz, DEPT, HSQC,  $\text{CDCl}_3$ ):  $\delta$  19.6 ( $\text{CH}_2$ ), 20.1 ( $\text{N}-\text{C}-\text{Me}$ ), 26.4 ( $\text{CH}_2$ ), 26.6 ( $\text{CH}_2$ ), 28.0 ( $\text{Me}_{\text{Boc}}$ ), 33.5 ( $\underline{\text{C}}\text{H}_2-\text{CHOH}$ ), 43.3 (CH), 53.6 ( $\underline{\text{C}}\text{H}-\text{Ar}$ ), 55.4 (OMe), 60.9 ( $\text{C}-\text{N}$ ), 69.0 ( $\text{CH}-\text{O}$ ), 80.6 ( $\text{C}_{\text{Boc}}$ ), 114.5 (br,  $\text{CH}_{\text{Ar}}$ ), 117.5 ( $\text{CH}_{\text{Ar}}$ ), 120.1 ( $\text{CH}_{\text{Ar}}$ ), 128.2 ( $\text{CH}_{\text{Ar}}$ ), 128.9 ( $\text{CH}_{\text{Ar}}$ ), 130.7 ( $\text{C}_{\text{Ar}}$ ), 131.2 ( $\text{C}_{\text{Ar}}$ ), 132.2 (br,  $\text{CH}_{\text{Ar}}$ ), 154.9 and 155.1 ( $\text{C}=\text{O}$  and  $\text{C}_{\text{Ar}}-\text{O}$ ), 159.1 ( $\text{C}_{\text{Ar}}-\text{O}$ ). Note: signal at 132.2 (br,  $\text{CH}_{\text{Ar}}$ ) was better observed at 323K.

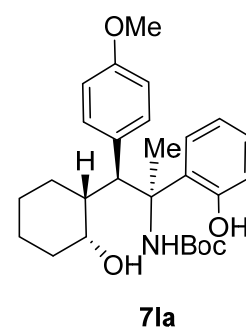

HRMS (ESI):  $m/z$  calcd. for  $[\text{C}_{27}\text{H}_{37}\text{NO}_5+\text{Na}^+]$ : 478.2564, found: 478.2558.

**tert-Butyl ((2*S*\*,3*S*\*)-4-hydroxy-2-(2-hydroxyphenyl)-3-(4-methoxyphenyl)butan-2-yl)carbamate (8fa).** Aminoalcohol **8fa** was obtained from nitroso acetal **6fa** (30 mg, 0.11 mmol) according to GP-3.



Hydrogenation was performed over Raney nickel (~30 mg) in MeOH (1.2 mL) at r.t. for 2 h. Column chromatography (eluent: PE/EtOAc, 2:1, then 1:1, then EtOAc) afforded 24 mg (59%) of the target protected amino alcohol **8fa** as colorless oil.  $R_f = 0.64$  (PE/EtOAc, 1:1, UV, anisaldehyde).

$^1\text{H}$  NMR (300 MHz, COSY,  $\text{CDCl}_3$ ):  $\delta$  1.24 (s, 9H, *t*-Bu), 1.71 (s, 3H, N-C-Me), 2.09 (br s, 1H, OH), 3.50 (app t,  $J = 6.9$  Hz, 1H, CH-Ar), 3/76-3.89 (m, overlapped, 2H, CH<sub>2</sub>OH), 3.83 (s, 3H, OMe), 5.42 (br s, 1H, NH), 6.80-6.92 (m, 4H, CH<sub>Ar</sub>), 6.98 (d,  $J = 6.8$  Hz, 1H, CH<sub>Ar</sub>), 7.07 (d,  $J = 8.6$  Hz, 2H, CH<sub>Ar</sub>), 7.19 (app t,  $J = 7.6$  Hz, 1H, CH<sub>Ar</sub>), 8.19 (br s, 1H, C<sub>Ar</sub>-OH).

$^{13}\text{C}$  NMR (75 MHz, DEPT, HSQC,  $\text{CDCl}_3$ ):  $\delta$  22.9 (N-C-Me), 28.0 (Me<sub>Boc</sub>), 54.8 (CH-Ar), 55.3 (OMe), 60.6 (C-N), 63.5 (CH<sub>2</sub>-O), 80.7 (C<sub>Boc</sub>), 114.2 (CH<sub>Ar</sub>), 117.3 (CH<sub>Ar</sub>), 119.7 (CH<sub>Ar</sub>), 128.1 (C<sub>Ar</sub>), 128.3 (CH<sub>Ar</sub>), 128.7 (CH<sub>Ar</sub>), 129.0 (C<sub>Ar</sub>), 131.2 (CH<sub>Ar</sub>), 155.0 (C<sub>Ar</sub>-OH), 155.5 (C=O), 159.2 (C<sub>Ar</sub>-OMe).

HRMS (ESI):  $m/z$  calcd. for  $[\text{C}_{22}\text{H}_{29}\text{NO}_5 + \text{H}^+]$ : 388.2118, found: 388.2122.

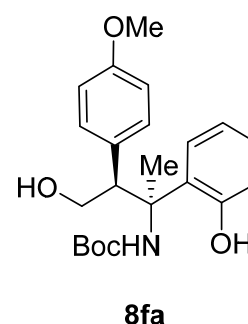

**(2S\*,3S\*,4S\*)-Ethyl 4-(tert-butoxycarbonylamino)-2-hydroxy-4-(2-hydroxyphenyl)-3-(4-methoxyphenyl)pentanoate (8ga).** Aminoalcohol **8ga** was obtained from nitroso acetal **6ga** (80 mg, 0.23 mmol) according to GP-3. Hydrogenation was performed over Raney nickel (~80 mg) in MeOH (2.5 mL) at 50 °C for 2 h. Column chromatography (eluent: PE, then PE/EtOAc, 10:1) afforded 59 mg (57%) of the target protected aminoalcohol **8ga** as white foam.  $R_f = 0.80$  (PE/EtOAc, 1:1, UV, anisaldehyde).

$^1\text{H}$  NMR (300 MHz, COSY,  $\text{CDCl}_3$ ):  $\delta$  1.01 (t,  $J = 7.1$  Hz, 3H, CH<sub>2</sub>CH<sub>3</sub>), 1.26 (s, 9H, *t*-Bu), 1.77 (s, 3H, Me), 3.68 (br d,  $J = 6.6$  Hz, 1H, CH-Ar), 3.79 (s, 3H, OMe), 3.79-3.95 (m, 2H, CH<sub>2</sub>CH<sub>3</sub>), 4.11 (br s, 1H, CH-OH), 4.59 (br s, 1H, CH-OH), 6.21 (br s, 1H, NH), 6.75 (d,  $J = 8.7$  Hz, 2H, CH<sub>Ar</sub>), 6.79-6.93 (m, 3H, CH<sub>ArOH</sub>), 6.94 (d,  $J = 8.6$  Hz, 2H, CH<sub>Ar</sub>), 7.18 (app t,  $J = 7.0$  Hz, 1H, CH<sub>ArOH</sub>), 8.20 (br s, 1H, C<sub>Ar</sub>-OH).

$^{13}\text{C}$  NMR (75 MHz, DEPT, HSQC,  $\text{CDCl}_3$ ):  $\delta$  13.7 (CH<sub>2</sub>CH<sub>3</sub>), 25.9 (N-C-Me), 28.0 (Me<sub>Boc</sub>), 55.2 (OMe), 55.9 (CH-Ar), 61.5 (CH<sub>2</sub>CH<sub>3</sub>), 61.8 (C-N), 74.6 (CH-O), 80.6 (C<sub>Boc</sub>), 113.3 (CH<sub>Ar</sub>), 117.0 (CH<sub>ArOH</sub>), 119.5 (CH<sub>ArOH</sub>), 126.9 (C<sub>Ar</sub>), 128.9 (CH<sub>ArOH</sub>), 129.1 (C<sub>Ar</sub>), 129.2 (CH<sub>ArOH</sub>), 131.8 (CH<sub>Ar</sub>), 155.6 (C<sub>Ar</sub>-OH), 155.9 (N-C=O), 159.1 (C<sub>Ar</sub>-OMe), 172.8 (O-C=O).

HRMS (ESI):  $m/z$  calcd. for  $[\text{C}_{25}\text{H}_{33}\text{NO}_7 + \text{Na}^+]$ : 482.2149, found: 482.2140.

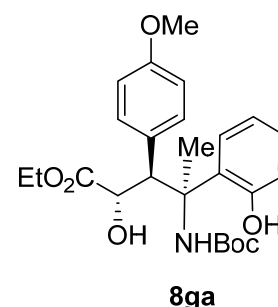

**tert-Butyl ((2S\*,3S\*)-5-hydroxy-2-(2-hydroxy-6-methoxyphenyl)-3-(4-methoxyphenyl)-5-methylhexan-2-yl)carbamate (7ab).**

1) *Synthesis from nitroso acetal 5ab*: Aminoalcohol **7ab** was obtained from nitroso acetal **5ab** (32 mg, 0.09 mmol) according to GP-3 with the following change: 3 equiv. of Boc<sub>2</sub>O were used. Hydrogenation was performed over Raney nickel (~30 mg) in MeOH (1.1 mL) at 50 °C for 6 h. Column chromatography (eluent: PE/EtOAc, 3:1, then 2:1, then 1:1) afforded 30 mg (72%) of the target protected aminoalcohol as colorless oil.

2) *Synthesis from tetrahydrooxazine 12ab*: A suspension of Raney nickel (~30 mg) in water was placed in a glass vial and washed with MeOH (3 × 2 mL). Then MeOH (0.6 mL) was added and resulting suspension was transferred into another vial containing the solution of tetrahydrooxazine **12ab** (32 mg, 0.09 mmol)

and Boc<sub>2</sub>O (29 mg, 0.13 mmol, 1.5 equiv) in MeOH (0.5 mL). The vial was equipped with magnetic stir bar and placed in a steel autoclave that was then flushed and filled with hydrogen to a pressure of 30 bar. The hydrogenation was conducted at 50 °C for 2 h with intensive stirring. Then, the autoclave was cooled to rt, slowly depressurised, and the reaction mixture was filtered through Celite, and then evaporated. The residue was subjected to column chromatography on silica gel (eluent: PE/EtOAc, 5:1, then 2:1, then 1:1, then EtOAc) to give 8 mg (25% recovery of starting tetrahydrooxazine **12ab**) and 17 mg (42%) of the target protected aminoalcohol as colorless oil.

R<sub>f</sub> = 0.70 (PE/EtOAc, 1:1, anisaldehyde).

<sup>1</sup>H NMR (300 MHz, COSY, CDCl<sub>3</sub>): δ 0.79 (s, 3H, Me), 0.81 (s, 3H, Me), 1.23 (s, 9H, *t*-Bu), 1.62 (br s, 1H, OH), 1.76 (app d, *J* = 13.6 Hz, 1H, CH<sub>2a</sub>), 1.83 (s, 3H, N–C–Me), 2.11 (dd, *J* = 14.2, 9.7 Hz, 1H, CH<sub>2b</sub>), 3.41 (app d, *J* = 9.3 Hz, 1H, CH–Ar), 3.82 (s, 3H, OMe), 3.85 (s, 3H, OMe), 4.43 (br s, 1H, NH), 6.50 (dd, *J* = 8.3, 1.0 Hz, 1H, CH<sub>ArOH</sub>), 6.56 (dd, *J* = 8.1, 1.1 Hz, 1H, CH<sub>ArOH</sub>), 6.96 (d, *J* = 8.5 Hz, 2H, CH<sub>Ar</sub>), 7.11 (t, *J* = 8.2 Hz, 1H, CH<sub>ArOH</sub>), 7.32 (d, *J* = 8.5 Hz, 2H, CH<sub>Ar</sub>), 8.78 (br s, 1H, C<sub>Ar</sub>–OH).

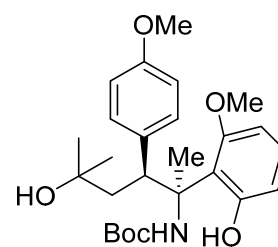

**7ab**

<sup>13</sup>C NMR (75 MHz, HSQC, HMBC, CDCl<sub>3</sub>): δ 23.2 (N–C–Me), 27.8 (Me<sub>Boc</sub>), 29.0 (Me), 29.2 (Me), 44.2 (CH<sub>2</sub>), 48.4 (CH–Ar), 55.3 (OMe), 55.9 (OMe), 63.1 (C–N), 71.2 (Me<sub>2</sub>C–O), 80.9 (C<sub>Boc</sub>), 104.4 (CH<sub>ArOH</sub>), 111.2 (CH<sub>ArOH</sub>), 114.5 (CH<sub>Ar</sub>), 117.9 (C<sub>ArOH</sub>), 128.2 (CH<sub>ArOH</sub>), 131.5 (CH<sub>Ar</sub>), 131.6 (C<sub>Ar</sub>), 155.3 (C=O), 156.4 (C<sub>Ar</sub>–OH), 159.06 and 159.10 (2×C<sub>Ar</sub>–OMe).

HRMS (ESI): *m/z* calcd. for [C<sub>26</sub>H<sub>37</sub>NO<sub>6</sub>+Na<sup>+</sup>]: 482.2513, found: 482.2520.

**3-Methoxy-2-((3S\*,4S\*)-4-(4-methoxyphenyl)-3,6,6-trimethyl-1,2-oxazinan-3-yl)phenol (12ab)**. Nitroso acetal **5ab** (50 mg, 0.14 mmol) was subjected to hydrogenation (30 atm H<sub>2</sub>) over Raney nickel (~50 mg) in MeOH (1.5 mL) at r.t. for 2 h as described in GP-3. Column chromatography (eluent: PE, then PE/EtOAc, 5:1, then 2:1, then 1:1, then 1:2, then EtOAc) gave two fractions: 32 mg (64%) of target tetrahydrooxazine **12ab** as white solid and 9 mg (14%) of aminoalcohol **7ab** as colorless oil, which solidified upon standing. R<sub>f</sub> = 0.88 (PE/EtOAc, 3:1, UV, anisaldehyde). mp = 118–121 °C.

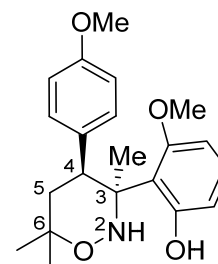

**12ab**

<sup>1</sup>H NMR (300 MHz, COSY, CDCl<sub>3</sub>): δ 1.28 (s, 3H, Me<sub>a</sub>(6)), 1.45 (s, 3H, Me<sub>b</sub>(6)), 1.47–1.58 (m, 1H, CH<sub>2a</sub>(5)), 1.98 (s, 3H, Me(3)), 2.49 (app t, *J* = 13.4 Hz, 1H, CH<sub>2b</sub>(5)), 3.00 (s, 3H, OMe), 3.18 (br d, *J* = 12.8 Hz, 1H, CH(4)), 3.73 (s, 3H, OMe), 5.02 (br s, 1H, NH), 5.90 (d, *J* = 8.2 Hz, 1H, CH<sub>ArOH</sub>), 6.46 (dd, *J* = 8.1, 1.1 Hz, 1H, CH<sub>ArOH</sub>), 6.61 (d, *J* = 8.5 Hz, 2H, CH<sub>Ar</sub>), 6.84 (d, *J* = 8.5 Hz, 2H, CH<sub>Ar</sub>), 6.98 (app t, *J* = 8.2 Hz, 1H, CH<sub>ArOH</sub>(7)), 13.62 (br s, 1H, OH).

<sup>13</sup>C NMR (75 MHz, DEPT, HSQC, HMBC, CDCl<sub>3</sub>): δ 25.6 (Me<sub>a</sub>(6)), 26.9 (Me<sub>b</sub>(6)), 28.0 (Me(3)), 39.1 (CH<sub>2</sub>(5)), 48.7 (br, CH(4)), 54.4 (OMe), 55.3 (OMe), 68.9 (br, C(3)), 78.5 (C(6)), 101.9 (CH<sub>ArOH</sub>), 110.5 (CH<sub>ArOH</sub>), 112.4 (CH<sub>Ar</sub>), 112.6 (C<sub>ArOH</sub>), 129.0 (CH<sub>ArOH</sub>), 129.9 (CH<sub>Ar</sub>), 133.6 (C<sub>Ar</sub>), 157.9 (C<sub>Ar</sub>–OMe), 159.3 (C<sub>ArOH</sub>–O), 159.4 (C<sub>ArOH</sub>–O).

HRMS (ESI): *m/z* calcd. for [C<sub>21</sub>H<sub>27</sub>NO<sub>4</sub>+H<sup>+</sup>]: 358.2013, found: 358.2007.

## Acid-mediated transformations of nitroso acetals **5** and **6**

**Diethyl 2-hydroxy-2-((4-methoxyphenyl)(2,2,2-trifluoroacetoxy)methyl)malonate (13).** To a solution of nitrosoacetal **6aa** (40 mg, 0.094 mmol) in dichloromethane (0.75 mL) was added trifluoroacetic acid (7  $\mu$ L, 11 mg, 0.094 mmol, 1 equiv.) and the reaction mixture was stirred overnight. Then, NaHCO<sub>3</sub> (~10 mg) was added, the reaction mixture was stirred for 1 min, diluted with EtOAc, filtered through a cotton wool and concentrated under reduced pressure to give 38 mg (99%) of target ester as pale yellow oil.

<sup>1</sup>H NMR (300 MHz, CDCl<sub>3</sub>):  $\delta$  1.25 (t,  $J$  = 7.1 Hz, 3H, CH<sub>2</sub>CH<sub>3</sub>), 1.33 (t,  $J$  = 7.1 Hz, 3H, CH<sub>2</sub>CH<sub>3</sub>), 3.81 (s, 3H, OMe), 4.08 (br s, 1H, OH), 4.21 (q,  $J$  = 7.1 Hz, 2H, CH<sub>2</sub>CH<sub>3</sub>), 4.29-4.40 (m, 2H, CH<sub>2</sub>CH<sub>3</sub>), 6.65 (s, 1H, CH-O), 6.88 (d,  $J$  = 8.8 Hz, 2H, CH<sub>Ar</sub>), 7.47 (d,  $J$  = 8.8 Hz, 2H, CH<sub>Ar</sub>).

<sup>13</sup>C NMR (75 MHz, DEPT, HSQC, HMBC, CDCl<sub>3</sub>):  $\delta$  13.87 (CH<sub>2</sub>CH<sub>3</sub>), 13.90 (CH<sub>2</sub>CH<sub>3</sub>), 55.2 (OMe), 63.4 (OCH<sub>2</sub>CH<sub>3</sub>), 63.6 (OCH<sub>2</sub>CH<sub>3</sub>), 78.9 (CH-O), 80.8 (C-OH), 113.8 (CH<sub>Ar</sub>), 114.4 (d,  $J$  = 285.8 Hz, CF<sub>3</sub>), 124.1 (C<sub>Ar</sub>), 130.3 (CH<sub>Ar</sub>), 156.0 (q,  $J$  = 43.1 Hz, C(O)CF<sub>3</sub>), 160.6 (C<sub>Ar</sub>-OMe), 166.9 (C=O), 167.7 (C=O).

<sup>19</sup>F NMR (282 MHz, CDCl<sub>3</sub>):  $\delta$  -75.1.

HRMS (ESI):  $m/z$  calcd. for [C<sub>17</sub>H<sub>19</sub>F<sub>3</sub>O<sub>8</sub>+NH<sub>4</sub><sup>+</sup>]: 426.1370, found: 426.1371.

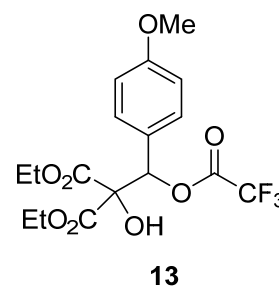

**Diethyl 2-hydroxy-2-(methoxy(4-methoxyphenyl)methyl)malonate (14).** To a solution of nitrosoacetal **6aa** (50 mg, 0.12 mmol, 1 equiv.) in MeOH (0.94 mL) was added trifluoroacetic acid (9  $\mu$ L, 13 mg, 0.12 mmol, 1 equiv.) and the reaction mixture was stirred overnight. Then, NaHCO<sub>3</sub> (~10 mg) was added, the reaction mixture was stirred for 1 min, diluted with EtOAc, filtered through a cotton wool and concentrated under reduced pressure. The residue was subjected to column chromatography on silica gel (eluent: PE/EtOAc, 4:1, then 2:1) to give 38 mg (99%) of target ether as pale yellow oil. R<sub>f</sub> = 0.31 (PE/EtOAc, 3:1, UV, anisaldehyde).

<sup>1</sup>H NMR (300 MHz, CDCl<sub>3</sub>):  $\delta$  1.21 (t,  $J$  = 7.1 Hz, 3H, CH<sub>2</sub>CH<sub>3</sub>), 1.36 (t,  $J$  = 7.1 Hz, 3H, CH<sub>2</sub>CH<sub>3</sub>), 3.23 (s, 3H, CH-OMe), 3.80 (s, 3H, C<sub>Ar</sub>-OMe), 3.83 (s, 1H, OH), 4.14 (q,  $J$  = 7.1 Hz, 2H, CH<sub>2</sub>CH<sub>3</sub>), 4.33 (dq,  $J$  = 10.8, 7.1 Hz, 1H, CH<sub>2a</sub>CH<sub>3</sub>), 4.42 (dq,  $J$  = 10.8, 7.1 Hz, 1H, CH<sub>2b</sub>CH<sub>3</sub>), 5.02 (s, 1H, CH-O), 6.87 (d,  $J$  = 8.7 Hz, 2H, CH<sub>Ar</sub>), 7.40 (d,  $J$  = 8.7 Hz, 2H, CH<sub>Ar</sub>).

<sup>13</sup>C NMR (75 MHz, DEPT, HSQC, HMBC, CDCl<sub>3</sub>):  $\delta$  13.9 (CH<sub>2</sub>CH<sub>3</sub>), 14.1 (CH<sub>2</sub>CH<sub>3</sub>), 55.2 (C<sub>Ar</sub>-OMe), 57.1 (CH-OMe), 62.5 (OCH<sub>2</sub>CH<sub>3</sub>), 62.9 (OCH<sub>2</sub>CH<sub>3</sub>), 82.4 (C-OH), 83.6 (CH-O), 113.4 (CH<sub>Ar</sub>), 126.7 (C<sub>Ar</sub>), 130.3 (CH<sub>Ar</sub>), 159.8 (C<sub>Ar</sub>-OMe), 167.7 (C=O), 169.1 (C=O).

HRMS (ESI):  $m/z$  calcd. for [C<sub>16</sub>H<sub>22</sub>O<sub>7</sub>+NH<sub>4</sub><sup>+</sup>]: 344.1704, found: 344.1712.

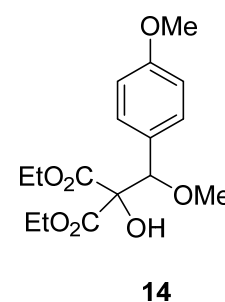

**3-Methylbenzo[d]isoxazole (15a).** To a solution of nitrosoacetal **6aa** (50 mg, 0.117 mmol) in CDCl<sub>3</sub> (1 mL) was added trifluoroacetic acid (9  $\mu$ L, 13.3 mg, 0.117 mmol, 1 equiv.) and the reaction mixture was stirred overnight. Then, trichloroethylene (10.5  $\mu$ L, 15.4 mg, 0.117 mmol, 1 equiv.) was added and the reaction mixture was analyzed by NMR, which showed the presence of trifluoroacetate **13** (ca. 80%) and volatile 3-methylbenzo[d]isoxazole **15a** (ca. 70%). <sup>1</sup>H and <sup>13</sup>C NMR signals of **15a** are in agreement with

literature data.<sup>20</sup> Also, the presence of 3-methylbenzo[d]isoxazole **15a** was confirmed by GC-MS analysis of the reaction mixture.

#### 4-Methoxy-4-(4-methoxyphenyl)-2-methylbutan-2-ol (**16**).

**Synthesis of 16 from 5aa:** To a solution of nitrosoacetal **5aa** (50 mg, 0.15 mmol, 1 equiv.) in MeOH (1.23 mL) was added trifluoroacetic acid (12  $\mu$ L, 18 mg, 0.15 mmol, 1 equiv.) and the reaction mixture was stirred overnight at rt. Then, NaHCO<sub>3</sub> (~10 mg) was added, the reaction mixture was stirred for 1 min, diluted with EtOAc, filtered through a cotton wool and concentrated under reduced pressure. The residue was subjected to column chromatography on silica gel (eluent: PE/EtOAc, 7:1, then 4:1) to give 34 mg (99%) of target ether **16** as pale yellow oil.  $R_f$  = 0.88 (PE/EtOAc, 3:1, UV, anisaldehyde).  $R_f$  = 0.33 (PE/EtOAc, 3:1, UV, anisaldehyde).

<sup>1</sup>H NMR (300 MHz, CDCl<sub>3</sub>):  $\delta$  1.22 (s, 3H, Me), 1.37 (s, 3H, Me), 1.62 (dd,  $J$  = 14.9, 2.7 Hz, 1H, CH<sub>2a</sub>), 2.05 (dd,  $J$  = 14.9, 11.3 Hz, 1H, CH<sub>2b</sub>), 3.20 (s, 3H, CH-OMe), 3.82 (s, 3H, C<sub>Ar</sub>-OMe), 4.13 (br s, 1H, OH), 4.47 (dd,  $J$  = 11.3, 2.7 Hz, 1H, CH-OMe), 6.91 (d,  $J$  = 8.6 Hz, 2H, CH<sub>Ar</sub>), 7.24 (d,  $J$  = 8.7 Hz, 2H, CH<sub>Ar</sub>).

<sup>13</sup>C NMR (75 MHz, DEPT, HSQC, HMBC, CDCl<sub>3</sub>):  $\delta$  28.1 (Me), 30.9 (Me), 50.3 (CH<sub>2</sub>), 55.3 (C<sub>Ar</sub>-OMe), 56.0 (CH-OMe), 70.3 (C-OH), 81.9 (CH-O), 113.9 (CH<sub>Ar</sub>), 127.7 (CH<sub>Ar</sub>), 133.6 (C<sub>Ar</sub>), 159.3 (C<sub>Ar</sub>-OMe).

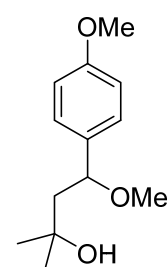

**16**

HRMS (ESI):  $m/z$  calcd. for [C<sub>13</sub>H<sub>20</sub>O<sub>3</sub>+Na<sup>+</sup>]: 247.1305, found: 247.1310.

**Synthesis of 16 from 5af:** To a solution of nitrosoacetal **5af** (20 mg, 0.056 mmol, 1 equiv.) in MeOH (0.44 mL) was added trifluoroacetic acid (4.5  $\mu$ L, 6.3 mg, 0.056 mmol, 1 equiv.) and the reaction mixture was stirred overnight at rt. Then, NaHCO<sub>3</sub> (~2 mg) was added, the reaction mixture was stirred for 1 min, diluted with EtOAc, filtered through a cotton wool and concentrated under reduced pressure. The residue was subjected to column chromatography on silica gel (eluent: PE/EtOAc, 30:1, then 5:1, then 2:1) to give 10 mg (80%) of target ether **16**. The second product, 4-chloro-3-methylbenzo[d]isoxazole **15f** (CAS RN 1784549-24-1) was detected by <sup>1</sup>H NMR and HRMS, however, its isolation was problematic due to its volatile character ( $R_f$  = 0.86 (PE/EtOAc, 10:1, UV). <sup>1</sup>H NMR (300 MHz, CDCl<sub>3</sub>)  $\delta$  7.47 – 7.32 (m, 2H, 2 CH<sub>Ar</sub>), 7.27 – 7.11 (m, 1H, CH<sub>Ar</sub>), 2.69 (s, 3H, CH<sub>3</sub>). HRMS (ESI):  $m/z$  calcd. for [C<sub>8</sub>H<sub>6</sub>ClNO+H<sup>+</sup>]: 168.0211 and 170.0181, found 168.0215 and 170.0187.).

**Synthesis of 16 from 5ag:** To a solution of nitrosoacetal **5ag** (8 mg, 0.021 mmol, 1 equiv.) in MeOH (0.84 mL) and CH<sub>2</sub>Cl<sub>2</sub> (60  $\mu$ L) was added trifluoroacetic acid (8  $\mu$ L, 12 mg, 0.105 mmol, 5 equiv.) and the reaction mixture was stirred for 7 h at rt. Then, additional portion of trifluoroacetic acid (8  $\mu$ L, 12 mg, 0.105 mmol, 5 equiv.) was added and the reaction mixture was stirred overnight. Then, NaHCO<sub>3</sub> (~10 mg) was added, the reaction mixture was stirred for 1 min, diluted with CH<sub>2</sub>Cl<sub>2</sub>, filtered through a cotton wool and concentrated under reduced pressure. The residue was subjected to column chromatography on silica gel (eluent: PE/EtOAc, 10:1, then 4:1) to give 2.5 mg (63%) of benzisoxazole **15g** and 3.2 mg (68%) of ether **16**.

**Methyl 3-methylbenzo[d]isoxazole-4-carboxylate (**15g**).** White solid. mp = 64–66 °C.  $R_f$  = 0.25 (PE/EtOAc, 10:1, UV).

<sup>1</sup>H NMR (300 MHz, CDCl<sub>3</sub>):  $\delta$  2.78 (s, 3H, Me(3)), 4.01 (s, 3H, CO<sub>2</sub>Me), 7.60 (dd,  $J$  = 8.4, 7.4 Hz, 1H, CH<sub>Ar</sub>(6)), 7.78 (dd,  $J$  = 8.4, 0.8 Hz, 1H, CH<sub>Ar</sub>(7)), 7.96 (dd,  $J$  = 7.4, 0.8 Hz, 1H, CH<sub>Ar</sub>(5)).

$^{13}\text{C}$  NMR (75 MHz, HMBC,  $\text{CDCl}_3$ ):  $\delta$  13.8 (Me(3)), 52.3 ( $\text{CO}_2\text{Me}$ ), 114.4 ( $\text{CH}_{\text{Ar}}(7)$ ), 120.1 ( $\text{C}_{\text{Ar}}(3\text{a})$ ), 126.0 ( $\text{C}_{\text{Ar}}(4)$ ), 126.3 ( $\text{CH}_{\text{Ar}}(5)$ ), 129.1 ( $\text{CH}_{\text{Ar}}(6)$ ), 155.3 ( $\text{C}(3)=\text{N}$ ), 164.0 ( $\text{C}(7\text{a})_{\text{Ar}}-\text{O}$ ), 165.8 ( $\text{CO}_2\text{Me}$ ).

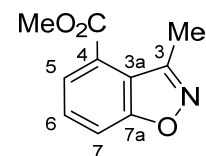

**15g**

HRMS (ESI):  $m/z$  calcd. for  $[\text{C}_{10}\text{H}_9\text{NO}_3+\text{H}^+]$ : 192.0655, found 192.0650.

**Diethyl 2-((11S\*,11aR\*)-7,8,9,10,11,11a-hexahydrobenzo[4,5]isoxazolo[2,3-a]azepin-11-yl)-2-hydroxymalonate (17).** To the stirring solution of nitroso acetal **6ea** (30 mg, 0.083 mmol) in  $\text{CHCl}_3$  (0.66 mL) was added  $\text{CF}_3\text{COOH}$  (13  $\mu\text{L}$ , 19 mg, 0.166 mmol, 2 equiv.) at r.t. The reaction mixture was maintained overnight. Then,  $\text{NaBH}_3\text{CN}$  (16 mg, 0.25 mmol, 3 equiv.) was added. After stirring for 15 min, second portion of  $\text{NaBH}_3\text{CN}$  (16 mg, 0.25 mmol, 3 equiv.) and MeOH (0.30 mL) was consecutively added. The reaction mixture was maintained overnight and transferred into EtOAc (20 mL) /  $\text{NaHCO}_3$  (20 mL, sat. aq. soln). Water layer was extracted with EtOAc (3 $\times$ 20 mL). Combined organic layer was washed with brine (20 mL), dried ( $\text{Na}_2\text{SO}_4$ ), and evaporated. The residue was subjected to column chromatography on silica gel to give 25 mg (83%) of target azepine as colorless oil that solidifies upon storage in a fridge.  $R_f$  = 0.32 (PE/EtOAc, 3:1, UV, ninhydrin).

$^1\text{H}$  NMR (300 MHz, COSY,  $\text{CDCl}_3$ , 323 K):  $\delta$  1.07 (t,  $J$  = 7.0 Hz, 3H,  $\text{CH}_2\text{CH}_3$ ), 1.29 (t,  $J$  = 7.0 Hz, 3H,  $\text{CH}_2\text{CH}_3$ ), 1.49-2.00 (br m, 5H,  $\text{CHCH}_2\text{aCH}_2\text{CH}_2$ ), 2.13-2.30 (br m, 1H,  $\text{CHCH}_2\text{b}$ ), 2.96 (app t,  $J$  = 9.6 Hz, 1H,  $\text{CH}_{2\text{a}}(7)-\text{N}$ ), 3.37-3.53 (br m, 2H,  $\text{CH}(11)\text{CH}-\text{N}$  and  $\text{CH}_{2\text{a}}\text{CH}_3$ ), 3.59-3.70 (br m, 1H,  $\text{CH}_{2\text{b}}\text{CH}_3$ ), 3.73-3.79 (m, 1H,  $\text{CH}_{2\text{b}}(7)-\text{N}$ ), 4.18-4.36 (m, 2H,  $\text{CH}_{2\text{cd}}\text{CH}_3$ ), 4.93 (app s, 1H,  $\text{CH}(11\text{a})-\text{N}$ ), 6.18 (br s, 1H, OH), 6.68 (d,  $J$  = 8.1 Hz, 1H,  $\text{CH}_{\text{Ar}}(4)$ ), 6.86 (app t,  $J$  = 7.4, 1H,  $\text{CH}_{\text{Ar}}(2)$ ), 7.11-7.16 (m, 2H,  $\text{CH}_{\text{Ar}}(1)$  and  $\text{CH}_{\text{Ar}}(3)$ ).

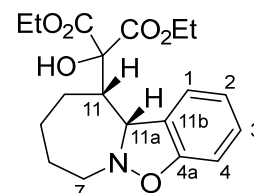

Characteristic NOESY-interactions:  $\text{CH}(11)\text{CH}-\text{N}$  /  $\text{CH}_{\text{Ar}}(1)$ ;  $\text{CH}(11)\text{CH}-\text{N}$  /  $\text{CH}(11\text{a})-\text{N}$ ;  $\text{CH}(11\text{a})-\text{N}$  /  $\text{CH}_{\text{Ar}}(1)$ ;  $\text{CH}(11\text{a})-\text{N}$  /  $\text{CH}_{2\text{a}}(7)-\text{N}$ .

$^{13}\text{C}$  NMR (75 MHz, DEPT, HSQC, HMBC,  $\text{CDCl}_3$ , 323 K):  $\delta$  13.5 ( $\text{CH}_2\text{CH}_3$ ), 13.9 ( $\text{CH}_2\text{CH}_3$ ), 24.9 (br,  $\text{CH}_2$ ), 25.6 (br,  $\text{CH}_2$ ), 28.3 (br,  $\text{CH}_2$ ), 39.2 (br,  $\text{CH}(11)\text{CH}-\text{N}$ ), 59.0 (br,  $\text{CH}_2(7)-\text{N}$ ), 61.7 (br,  $\text{OCH}_2\text{CH}_3$ ), 62.0 ( $\text{OCH}_2\text{CH}_3$ ), 72.1 (br,  $\text{CH}(11\text{a})-\text{N}$ ), 83.4 ( $\text{C}-\text{OH}$ ), 106.6 ( $\text{CH}_{\text{Ar}}(4)$ ), 120.3 ( $\text{CH}_{\text{Ar}}(2)$ ), 124.7 (br,  $\text{CH}_{\text{Ar}}(1)$  and  $\text{C}_{\text{Ar}}(11\text{b})$ ), 128.9 ( $\text{CH}_{\text{Ar}}(3)$ ), 156.5 (br,  $\text{C}_{\text{Ar}}(4\text{a})-\text{O}$ ), 169.0 ( $\text{C}=\text{O}$ ), 170.0 ( $\text{C}=\text{O}$ ).

HRMS (ESI):  $m/z$  calcd. for  $[\text{C}_{19}\text{H}_{25}\text{NO}_6+\text{H}^+]$ : 364.1755, found: 364.1769.

Crystals for X-ray diffraction analysis were obtained by crystallization from PE – ethyl acetate 5:1 mixture at ca.  $0^\circ\text{C}$ . The crystallographic information for compound **17** was deposited in the Cambridge Crystallographic Data Centre (CCDC 2250121).

## Elucidation of structure and relative stereochemistry of products 5 and 6

The relative configuration of cycloadducts **5** and **6** was elucidated on the basis of 2D NOESY spectra and X-ray diffraction analysis for products *trans*-**5ba**, *trans*-**5da**, *cis*-**6aa**, *cis*-**6ca**, *cis*-**6da**, *cis*-**6ia**, and for the minor isomer *cis*-**5ab** (see X-ray crystallography section). In the crystal structure of 6,5-bicyclic products *trans*-**5ba** and *trans*-**5da**, the 1,2-oxazine ring adopts a boat-like conformation (closer to a twist-boat one in **5da**) with the aryl group at C(4) and the methyl at C(4a) occupying pseudo-equatorial positions (*trans*-arrangement of substituents at C(4) and C(4a)). According to DFT calculations of possible conformations of *trans*-**5ba**, the conformer observed in the crystal structure is the most stable. The structure with a chair-like conformation of the 1,2-oxazine ring is less stable by ca. 2 kcal/mol. Calculations of hypothetical *cis*-**5ba** show the twist boat conformation of the 1,2-oxazine ring to be the most stable, yet it is separated from the chair conformation by less than 1 kcal/mol (see DFT calculations section).

The X-ray structures are consistent with the characteristic correlations observed in the  $^1\text{H}$ - $^1\text{H}$  NOESY spectra of *trans*-**5ba** and *trans*-**5da** and the major isomers of the majority of other 5,6-annulated products **5** (Figure S5). Here, the bridgehead substituent R showed a cross-peak to both H(4) and the substituent at the C(4) (shown in orange color) that is indicative of a (pseudo)equatorial position of R. Also, small cross-peaks between the C(4) substituent (usually, an aryl group) and the aromatic H(5) atom were observed supporting their relative *cis*-disposition. As for 4,4a-*cis*-isomers (*cis*-**5**), the bridgehead substituent R showed a cross-peak with the substituent at C(4), while the cross-peak with the H(4) hydrogen was negligible. Importantly, the substituent R showed a cross-peak with one of the H(3) hydrogens suggesting their pseudo-axial positions.

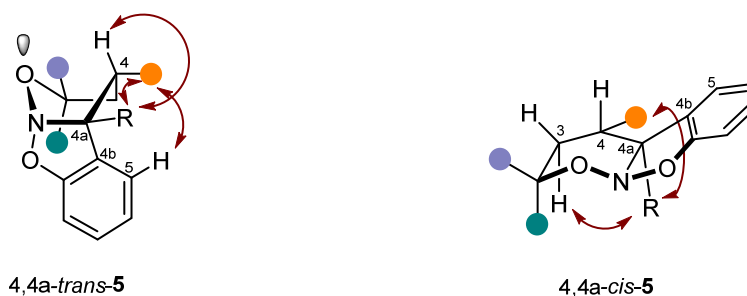

**Figure S5.** Characteristic 2D NOESY correlations in *trans*-**5** and *cis*-**5**

While  $^1\text{H}$ - $^1\text{H}$  coupling constants and  $^1\text{H}$ - $^1\text{H}$  NOESY spectra allowed us to establish the relative stereochemistry of carbon centers, we cannot be sure in the relative configuration of nitrogen due to

the absence of any characteristic interactions. However, DFT calculations (performed for *trans-5ba* and *cis-5ba*) predict that invertomers having *trans*-arrangement of the nitrogen lone electron pair and substituent R are less stable by ca. 6–12 kcal/mol (compared to the most stable conformations of *trans-5ba* and *cis-5ba*, see DFT calculations section). This arrangement is also confirmed by X-ray data in the crystal state. No isomerization attributed to the nitrogen inversion was observed upon moderate heating.

In the  $^1\text{H}$  NMR spectra of 4-aryl-substituted 6,5-bicyclic adducts **5**, the chemical shift of the aromatic H(5) hydrogen (in the former aryne moiety) is indicative of the relative C(4)/C(4a) configuration (Figure S6). In the 4,4a-*trans*-isomers (*trans-5*), a strong upfield shift to 5.9–6.8 ppm due to the anisotropic effect of the aryl group at C(4) is observed. In 4,4a-*cis*-isomers (*cis-5*) as well as in products lacking the aryl-group at C(4) (e.g. **5da** and **5ga**), the H(5) hydrogen resonates at 7.2–7.4 ppm and is often overlapped with other aromatic protons. The same trend occurs in 5,5-annulated nitroso acetals 3,3a-*trans*-**6** bearing an aryl group at the C(3) carbon.

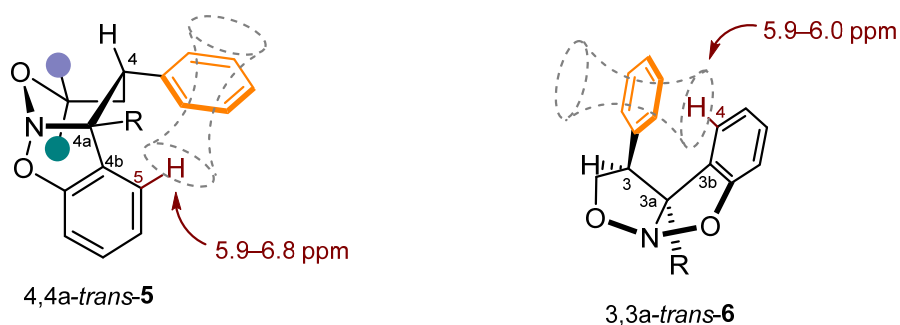

**Figure S6.** Anisotropic effect of the aryl group in *trans-5* and *trans-6*

## X-ray crystallography

X-ray diffraction data for *trans-5ba* were collected at 120 K with a Bruker APEXII DUO CCD diffractometer, and those for others (*trans-5da*, *cis-6aa*, *cis-6ca*, *cis-6da*, *trans-6ia*, *cis-5ab*, and **17**), at 100 K with a Bruker Quest D8 CMOS diffractometer, using graphite monochromated Mo-K $\alpha$  radiation ( $\lambda$  = 0.71073 Å,  $\omega$ -scans). Structures were solved using Intrinsic Phasing with the ShelXT<sup>21</sup> structure solution program in Olex2<sup>22</sup> and then refined with the XL<sup>23</sup> refinement package using Least-Squares minimization against  $F^2$  in the anisotropic approximation for non-hydrogen atoms. Positions of other hydrogen atoms were calculated, and they were refined in the isotropic approximation within the riding model.

General view of compounds *trans-5ba*, *trans-5da*, *cis-6aa*, *cis-6ca* and *cis-6da* is shown in Fig. S7. General view of compounds *trans-6ia*, *cis-5ab*, and **17** is shown in Fig. S8.

Crystal data and structure refinement parameters are given in Tables S1 and S2.

Supplementary crystallographic data is available from the CCDC with the following deposit numbers:

|              |                  |
|--------------|------------------|
| CCDC 2237935 | <i>trans-5ba</i> |
| CCDC 2237936 | <i>cis-6aa</i>   |
| CCDC 2237937 | <i>cis-6ca</i>   |
| CCDC 2237938 | <i>cis-6da</i>   |
| CCDC 2240874 | <i>trans-5da</i> |
| CCDC 2250118 | <i>trans-6ia</i> |
| CCDC 2250122 | <i>cis-5ab</i>   |
| CCDC 2250121 | <b>17</b>        |



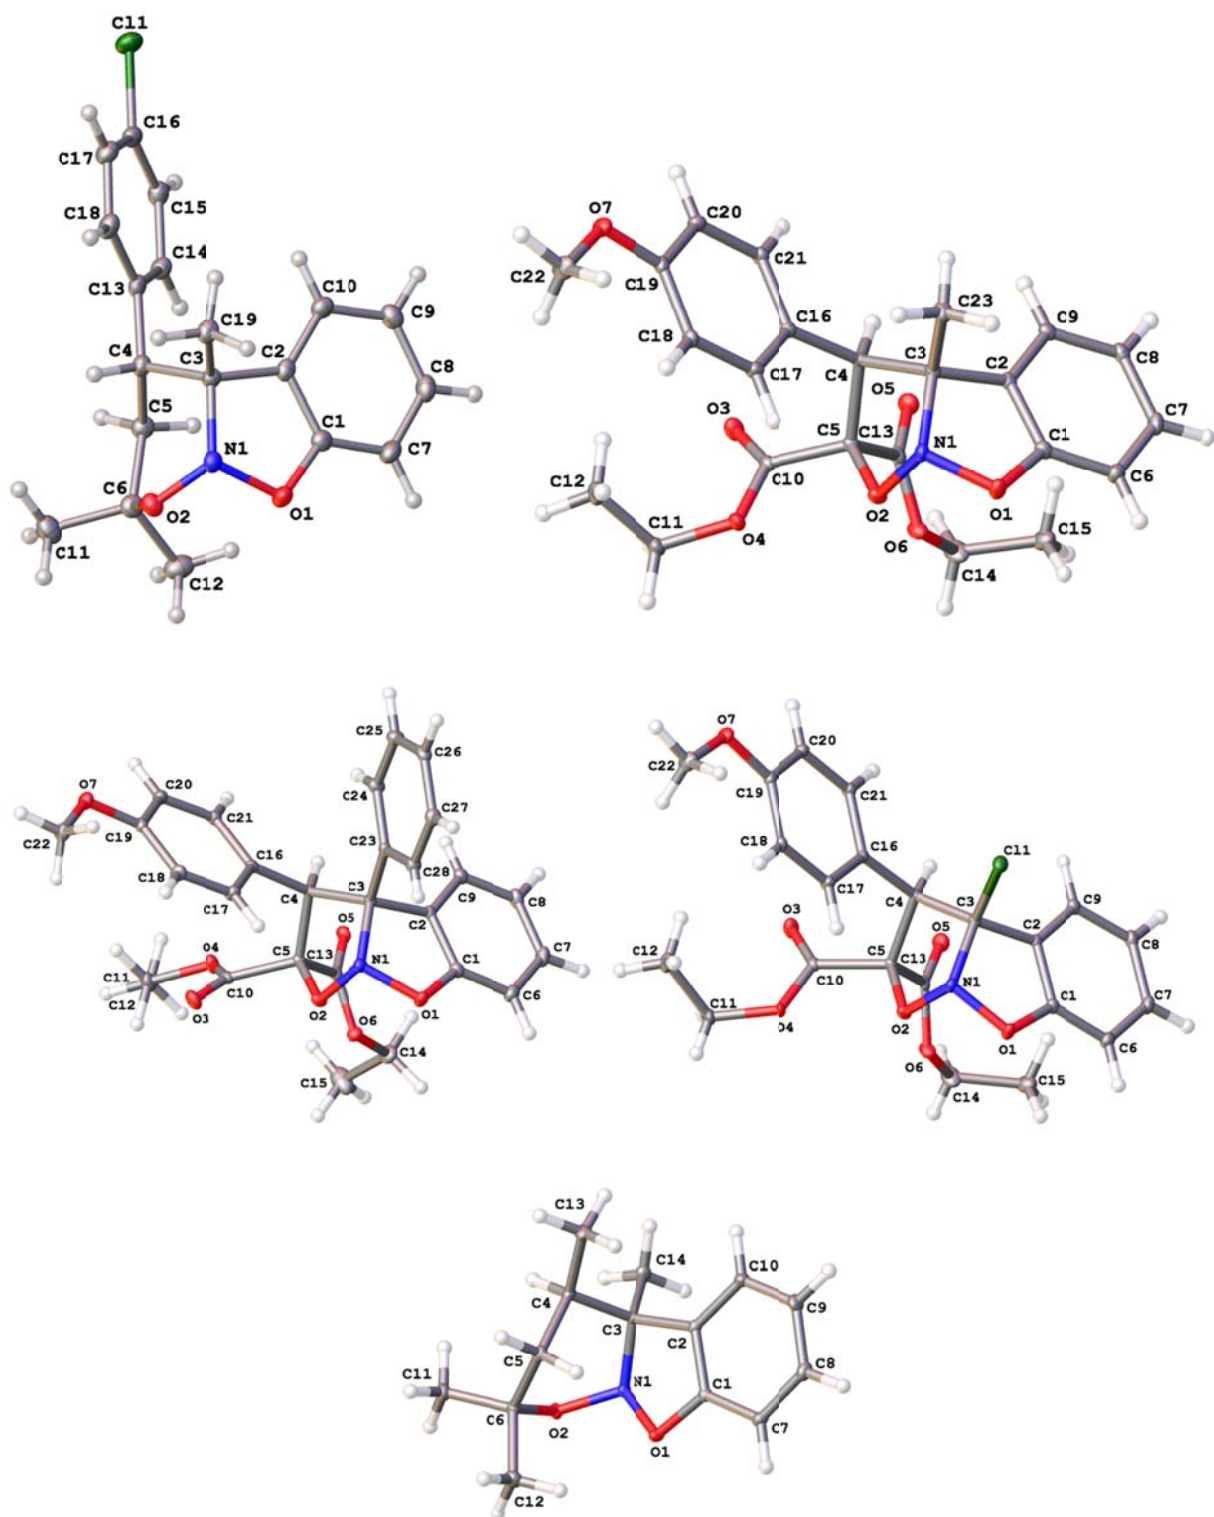

**Fig. S7.** General view of *trans*-5ba (top left), *cis*-6aa (top right), *cis*-6ca (middle left) and *cis*-6da (middle right) and *trans*-5da (bottom) in representation of atoms *via* thermal ellipsoids at 30% probability level.

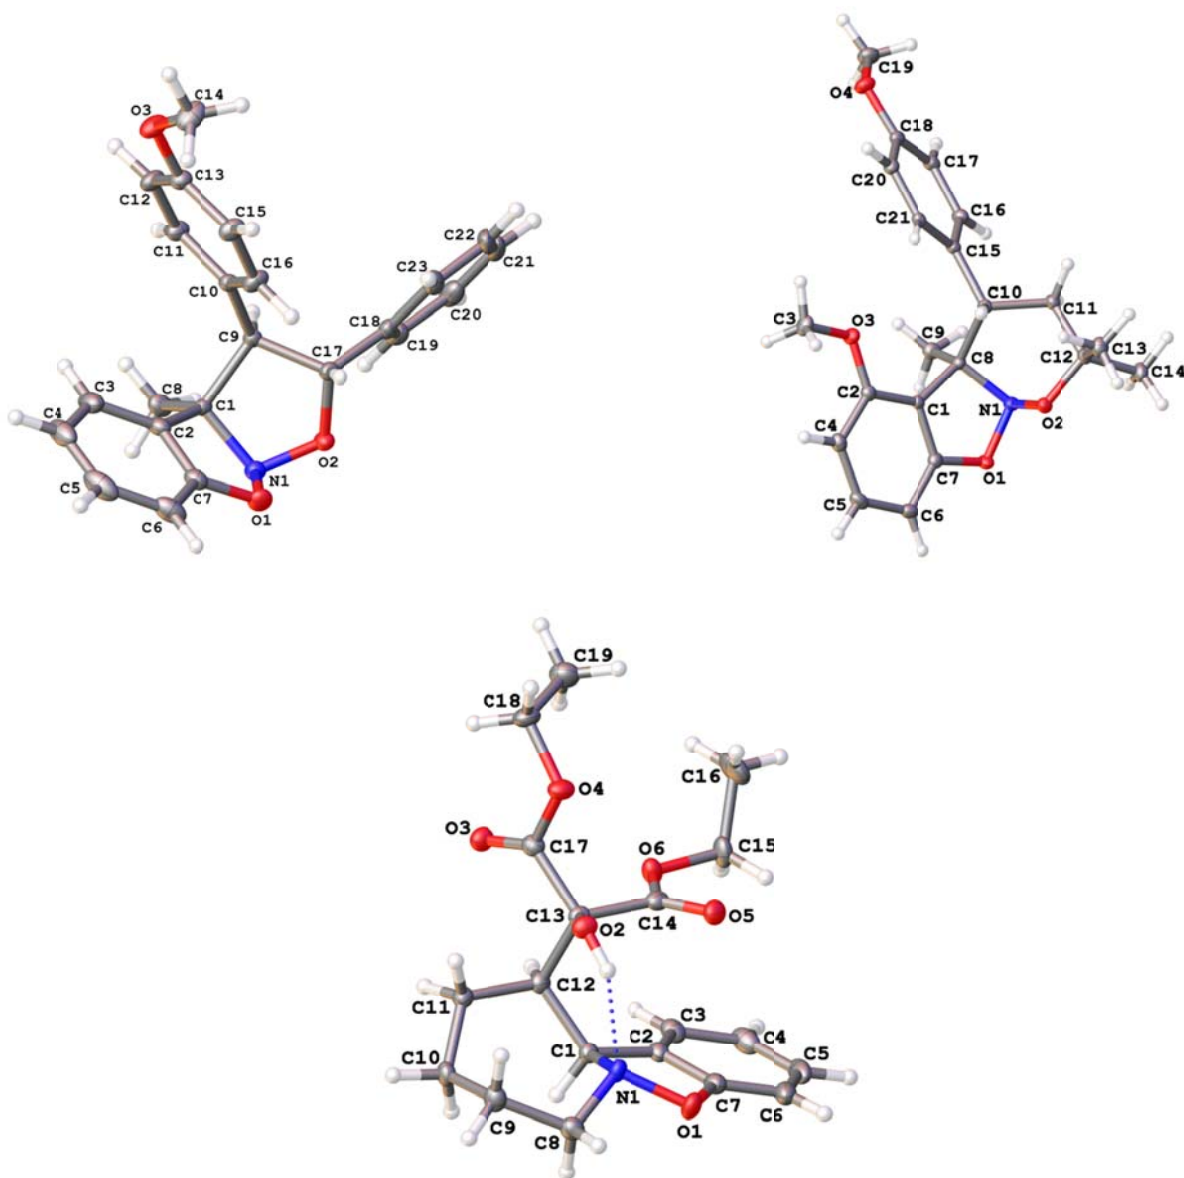

**Fig. S8.** General view of *trans-6ia* (top left), *cis-5ab* (top right) and **17** (bottom) in representation of atoms *via* thermal ellipsoids at 50% probability level.

**Table S1.** Crystal data and structure refinement parameters for *trans*-5ba, *trans*-5da, *cis*-6aa, *cis*-6ca and *cis*-6da.

|                                                           | <i>trans</i> -5ba                                 | <i>cis</i> -6aa                                 | <i>cis</i> -6ca                                 | <i>cis</i> -6da                                   | <i>trans</i> -5da                               |
|-----------------------------------------------------------|---------------------------------------------------|-------------------------------------------------|-------------------------------------------------|---------------------------------------------------|-------------------------------------------------|
| Empirical formula                                         | C <sub>19</sub> H <sub>20</sub> ClNO <sub>2</sub> | C <sub>23</sub> H <sub>25</sub> NO <sub>7</sub> | C <sub>28</sub> H <sub>27</sub> NO <sub>7</sub> | C <sub>22</sub> H <sub>22</sub> ClNO <sub>7</sub> | C <sub>14</sub> H <sub>19</sub> NO <sub>2</sub> |
| Formula weight                                            | 329.81                                            | 427.44                                          | 489.50                                          | 447.85                                            | 233.30                                          |
| T, K                                                      | 120                                               | 100                                             | 100                                             | 100                                               | 100                                             |
| Crystal system                                            | Monoclinic                                        | Triclinic                                       | Monoclinic                                      | Triclinic                                         | Monoclinic                                      |
| Space group                                               | P2 <sub>1</sub> /c                                | P-1                                             | C2/c                                            | P-1                                               | P2 <sub>1</sub> /n                              |
| Z                                                         | 4                                                 | 2                                               | 8                                               | 2                                                 | 4                                               |
| a, Å                                                      | 9.4108(6)                                         | 8.2690(2)                                       | 18.0942(6)                                      | 8.2903(2)                                         | 8.3557(2)                                       |
| b, Å                                                      | 7.4249(5)                                         | 11.3776(3)                                      | 12.8516(4)                                      | 11.3338(3)                                        | 12.0543(3)                                      |
| c, Å                                                      | 23.5740(16)                                       | 12.6210(3)                                      | 20.5407(7)                                      | 12.6044(3)                                        | 12.7272(3)                                      |
| α, °                                                      | 90                                                | 65.3470(10)                                     | 90                                              | 65.4040(10)                                       | 90                                              |
| β, °                                                      | 98.9610(10)                                       | 81.305(2)                                       | 93.074(2)                                       | 81.0380(10)                                       | 98.3530(10)                                     |
| γ, °                                                      | 90                                                | 82.114(2)                                       | 90                                              | 82.3700(10)                                       | 90                                              |
| V, Å <sup>3</sup>                                         | 1627.11(19)                                       | 1063.13(5)                                      | 4769.6(3)                                       | 1060.66(5)                                        | 1268.31(5)                                      |
| D <sub>calc</sub> (g cm <sup>-3</sup> )                   | 1.346                                             | 1.335                                           | 1.363                                           | 1.402                                             | 1.222                                           |
| Linear absorption, μ (cm <sup>-1</sup> )                  | 2.44                                              | 0.99                                            | 0.98                                            | 2.25                                              | 0.91                                            |
| F(000)                                                    | 696                                               | 452                                             | 2064                                            | 468                                               | 504                                             |
| 2θ <sub>max</sub> , °                                     | 54                                                | 54                                              | 58                                              | 58                                                | 54                                              |
| Reflections measured                                      | 16452                                             | 10765                                           | 31219                                           | 13623                                             | 14324                                           |
| Independent reflections                                   | 3551                                              | 4440                                            | 6335                                            | 5625                                              | 2769                                            |
| Observed reflections [ <i>I</i> > 2σ( <i>I</i> )]         | 3111                                              | 3809                                            | 4584                                            | 4899                                              | 2324                                            |
| Parameters                                                | 211                                               | 284                                             | 339                                             | 283                                               | 158                                             |
| R1                                                        | 0.0333                                            | 0.0384                                          | 0.0491                                          | 0.0346                                            | 0.0401                                          |
| wR2                                                       | 0.0802                                            | 0.0981                                          | 0.1239                                          | 0.0878                                            | 0.0978                                          |
| GOF                                                       | 1.058                                             | 1.094                                           | 1.027                                           | 1.031                                             | 1.045                                           |
| Δρ <sub>max</sub> /Δρ <sub>min</sub> (e Å <sup>-3</sup> ) | 0.308/-0.224                                      | 0.403/-0.229                                    | 0.445/-0.273                                    | 0.462/-0.322                                      | 0.331/-0.225                                    |

**Table S2.** Crystal data and structure refinement parameters for *trans-6ia*, *cis-5ab* and **17**.

|                                                           | <i>trans-6ia</i>                                | <i>cis-5ab</i>                                  | <b>17</b>                                       |
|-----------------------------------------------------------|-------------------------------------------------|-------------------------------------------------|-------------------------------------------------|
| Empirical formula                                         | C <sub>23</sub> H <sub>21</sub> NO <sub>3</sub> | C <sub>21</sub> H <sub>25</sub> NO <sub>4</sub> | C <sub>19</sub> H <sub>25</sub> NO <sub>6</sub> |
| Formula weight                                            | 359.41                                          | 355.42                                          | 363.40                                          |
| T, K                                                      | 100                                             | 100                                             | 100                                             |
| Crystal system                                            | Monoclinic                                      | Monoclinic                                      | Monoclinic                                      |
| Space group                                               | P2 <sub>1</sub> /c                              | C2/c                                            | P2 <sub>1</sub> /c                              |
| Z                                                         | 4                                               | 8                                               | 4                                               |
| a, Å                                                      | 9.3222(2)                                       | 16.0364(3)                                      | 7.6481(4)                                       |
| b, Å                                                      | 9.7350(2)                                       | 7.7955(2)                                       | 14.5397(9)                                      |
| c, Å                                                      | 20.5787(4)                                      | 29.9446(5)                                      | 16.0367(8)                                      |
| α, °                                                      | 90                                              | 90                                              | 90                                              |
| β, °                                                      | 100.0680(10)                                    | 104.0650(10)                                    | 97.315(2)                                       |
| γ, °                                                      | 90                                              | 90                                              | 90                                              |
| V, Å <sup>3</sup>                                         | 1838.79(7)                                      | 3631.20(13)                                     | 1768.78(17)                                     |
| D <sub>calc</sub> (g cm <sup>-3</sup> )                   | 1.298                                           | 1.300                                           | 1.365                                           |
| Linear absorption, μ (cm <sup>-1</sup> )                  | 0.86                                            | 0.9                                             | 1.01                                            |
| F(000)                                                    | 760                                             | 1520                                            | 776                                             |
| 2θ <sub>max</sub> , °                                     | 58                                              | 58                                              | 58                                              |
| Reflections measured                                      | 23650                                           | 17677                                           | 11391                                           |
| Independent reflections                                   | 4893                                            | 4806                                            | 4500                                            |
| Observed reflections [ <i>I</i> > 2σ( <i>I</i> )]         | 4459                                            | 4044                                            | 3145                                            |
| Parameters                                                | 246                                             | 240                                             | 237                                             |
| R1                                                        | 0.0403                                          | 0.0408                                          | 0.0511                                          |
| wR2                                                       | 0.1066                                          | 0.1050                                          | 0.1129                                          |
| GOF                                                       | 1.046                                           | 1.019                                           | 1.033                                           |
| Δρ <sub>max</sub> /Δρ <sub>min</sub> (e Å <sup>-3</sup> ) | 0.348/-0.222                                    | 0.386/-0.221                                    | 0.338/-0.239                                    |

## DFT calculations

DFT calculations were performed with the Gaussian 16 Rev C.01.<sup>24</sup> M11 DFT functional with Def2TZVP basis set was used for geometry optimization and calculations of thermodynamics. Calculations were performed in acetonitrile (SMD model), the approach of Martin and co-workers was followed.<sup>25</sup> Cartesian coordinates are given in angstroms; absolute energies for all substances are given in hartrees. Analysis of vibrational frequencies was performed for all optimized structures. All compounds were characterized by only real vibrational frequencies. Wavefunction stability, using stable keyword, was also checked for each molecule.

For calculations of optimized geometries, frequencies and thermodynamics following keywords were used:

```
# opt freq scrf=(smd,solvent=acetonitrile) nosymm def2tzvp m11 pressure=469 scf=xqc  
temperature=298.15 test
```

**Table S3.** Relative thermodynamic stability of conformations **1-A** and **1-B** in nitronates **1a** and **1g**

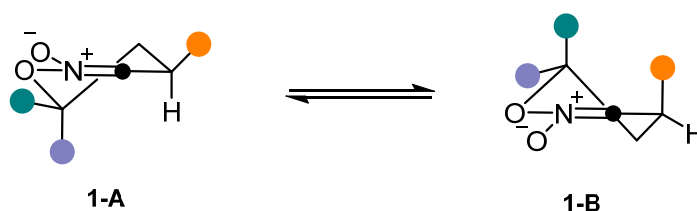

| Nitronate | Conformation | $\Delta E_0$ Kcal/mol | $\Delta G^\circ_{298,15K}$ Kcal/mol |
|-----------|--------------|-----------------------|-------------------------------------|
| <b>1a</b> | <b>1a-A</b>  | 0                     | 0                                   |
| <b>1a</b> | <b>1a-B</b>  | +1.43                 | +2.73                               |
| <b>1g</b> | <b>1g-A</b>  | +0.65                 | +0.80                               |
| <b>1g</b> | <b>1g-B</b>  | 0                     | 0                                   |

**Table S4.** Relative thermodynamic stability of conformations in nitroso acetal *trans*-5ba

| Conformation        | Structure                                                                           | $\Delta E_0$ Kcal/mol | $\Delta G^\circ_{298,15K}$ Kcal/mol |
|---------------------|-------------------------------------------------------------------------------------|-----------------------|-------------------------------------|
| <i>trans</i> -5ba-A | 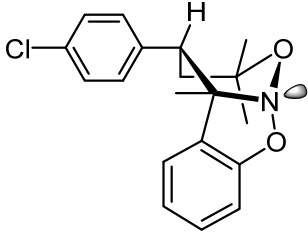   | 0                     | 0                                   |
| <i>trans</i> -5ba-B |    | +3.07                 | +3.33                               |
| <i>trans</i> -5ba-C |   | +1.73                 | +2.07                               |
| <i>trans</i> -5ba-D |  | +9.75                 | +9.87                               |
| <i>trans</i> -5ba-E |  | +12.73                | +12.66                              |

**Table S5.** Relative thermodynamic stability of conformations in nitroso acetal *cis-5ba*

| Conformation     | Structure                                                                           | $\Delta E_0$ Kcal/mol | $\Delta G^\circ_{298,15K}$ Kcal/mol |
|------------------|-------------------------------------------------------------------------------------|-----------------------|-------------------------------------|
| <i>cis-5ba-A</i> | 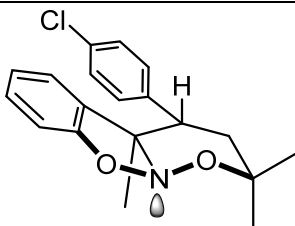   | 0                     | 0                                   |
| <i>cis-5ba-B</i> |    | +3.82                 | +3.23                               |
| <i>cis-5ba-C</i> |   | +1.33                 | +0.71                               |
| <i>cis-5ba-D</i> |  | +6.75                 | +6.28                               |
| <i>cis-5ba-E</i> |  | +7.14                 | +6.68                               |

1a (conformation 1a-A)

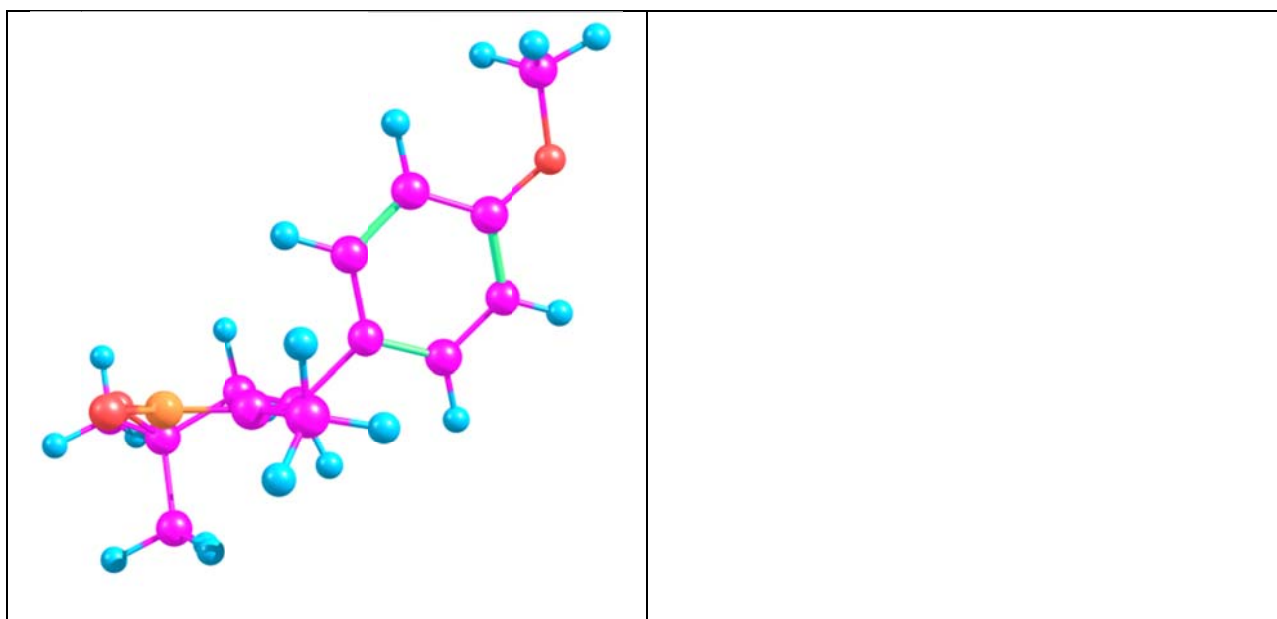

Charge 0; multiplicity 1

|   |             |             |             |
|---|-------------|-------------|-------------|
| H | -8.99215900 | 3.59955400  | 1.83941100  |
| H | -8.22873500 | 2.10827000  | 2.43206400  |
| C | -8.28190800 | 2.31961200  | 0.25745100  |
| C | -8.11247800 | 0.85639800  | -0.11546200 |
| O | -6.95619300 | 2.92573100  | 0.18974400  |
| N | -5.97633000 | 2.31085500  | 0.96588000  |
| C | -6.05102500 | 1.06546700  | 1.29720500  |
| C | -7.17946600 | 0.16195200  | 0.87426600  |
| C | -6.63827700 | -1.14118700 | 0.31305100  |
| C | -4.94867800 | 0.55288300  | 2.16083000  |
| C | -7.10553400 | -2.36967100 | 0.77189400  |
| C | -6.63124800 | -3.55540300 | 0.24141300  |
| C | -5.66715800 | -3.53404700 | -0.76495200 |
| C | -5.18578000 | -2.31381900 | -1.23274100 |
| C | -5.67838000 | -1.13419100 | -0.68910400 |
| O | -5.25060800 | -4.73783000 | -1.22951800 |
| C | -4.26231000 | -4.75195700 | -2.25247400 |
| C | -8.86579400 | 2.52933300  | 1.64800100  |
| H | -7.68334500 | 0.81136600  | -1.12361800 |
| H | -7.73903900 | -0.08245300 | 1.78812800  |
| H | -5.19561000 | -0.44682800 | 2.52634300  |
| H | -4.00741600 | 0.50320600  | 1.59913000  |
| H | -4.78615500 | 1.23009000  | 3.00592100  |
| H | -7.85396100 | -2.39679400 | 1.56239200  |
| H | -6.99423500 | -4.51598900 | 0.59812700  |
| H | -4.43246100 | -2.27140200 | -2.01267800 |
| H | -5.29725000 | -0.18133300 | -1.05767900 |
| H | -4.07042900 | -5.80233500 | -2.48001500 |
| H | -4.62402700 | -4.24203300 | -3.15427300 |
| H | -3.33517300 | -4.27660400 | -1.90806200 |
| O | -5.04806800 | 3.09963300  | 1.26887200  |



|   |              |            |             |
|---|--------------|------------|-------------|
| H | -9.84620600  | 2.04465600 | 1.70534600  |
| C | -9.07744400  | 3.07233500 | -0.79209600 |
| H | -10.10345500 | 2.69104900 | -0.80810000 |
| H | -9.10375800  | 4.14093800 | -0.55595800 |
| H | -8.63257300  | 2.93374200 | -1.78254900 |
| H | -9.08463300  | 0.35412900 | -0.13507900 |

|                                                   |                              |
|---------------------------------------------------|------------------------------|
| DFT M11/Def2TZVP, solvent acetonitrile, SMD model |                              |
| Total electronic energy=                          | -825.152297 $E_0$            |
| Sum of electronic and zero-point Energies=        | -824.841752 $E_0 + E_{ZPE}$  |
| Sum of electronic and thermal Energies=           | -824.824302 $E_0 + E_{tot}$  |
| Sum of electronic and thermal Enthalpies=         | -824.823358 $E_0 + H_{corr}$ |
| Sum of electronic and thermal Free Energies=      | -824.881205 $E_0 + G_{corr}$ |
| Zero-point correction ( <i>unscaled</i> ) =       | 0.310546                     |
| Number of imaginary vibrational frequencies = 0   |                              |

**1a (conformation 1a-B)**

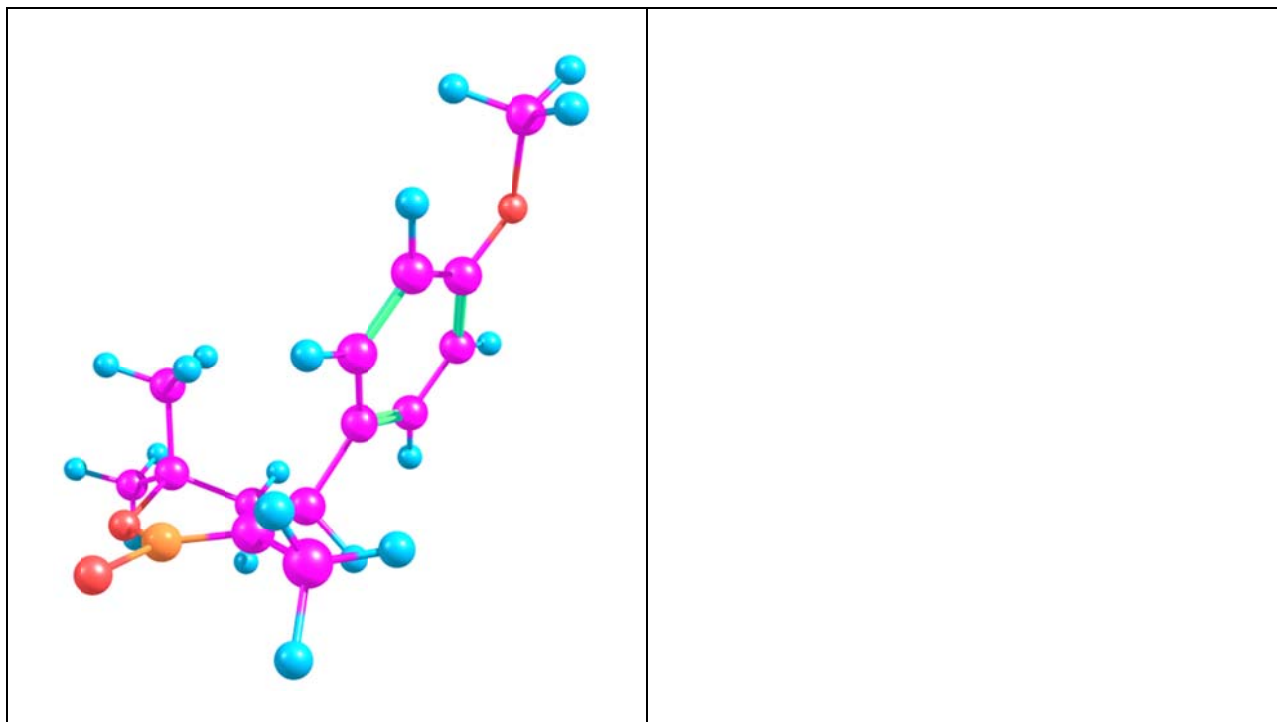

Charge 0; multiplicity 1

|   |             |             |             |
|---|-------------|-------------|-------------|
| C | -9.27137200 | 2.45758900  | -1.26908500 |
| C | -8.05063800 | 1.74249600  | -0.71935900 |
| C | -8.45014000 | 0.69490500  | 0.30885900  |
| O | -7.32453600 | 2.78816500  | -0.00888400 |
| N | -6.25268000 | 2.36407600  | 0.77190000  |
| C | -6.17197100 | 1.16338400  | 1.24184000  |
| C | -7.22343700 | 0.11466500  | 1.01810100  |
| C | -6.67348300 | -1.14679400 | 0.35459700  |
| C | -4.99247900 | 0.89066300  | 2.11460400  |
| O | -5.43179200 | 3.28879400  | 0.98428700  |
| C | -7.48169200 | -2.28619200 | 0.33894300  |
| C | -7.05464100 | -3.46378600 | -0.23798100 |
| C | -5.78752900 | -3.53665700 | -0.81977300 |
| C | -4.96592800 | -2.41678400 | -0.81099000 |
| C | -5.41809300 | -1.23744600 | -0.22355200 |
| O | -5.43994900 | -4.72869000 | -1.36399000 |
| C | -4.15431700 | -4.83649800 | -1.96255200 |
| H | -9.86877700 | 1.74917800  | -1.85230200 |
| H | -8.96711100 | 3.28039600  | -1.92380800 |
| H | -9.02499100 | -0.09887100 | -0.17732500 |
| H | -7.53926400 | -0.19464100 | 2.02415000  |
| H | -5.01407100 | 1.55329200  | 2.98825200  |
| H | -5.00617500 | -0.14998900 | 2.44639800  |
| H | -4.05671000 | 1.09271500  | 1.58141400  |
| H | -8.47077300 | -2.24410800 | 0.79387500  |
| H | -7.68723000 | -4.34789500 | -0.24672100 |
| H | -3.97624800 | -2.44495700 | -1.25513400 |

|   |             |             |             |
|---|-------------|-------------|-------------|
| H | -4.75761600 | -0.37221100 | -0.23406300 |
| H | -4.07268200 | -5.85974900 | -2.33433400 |
| H | -4.05158300 | -4.13372600 | -2.79889700 |
| H | -3.36246700 | -4.65015900 | -1.22617800 |
| H | -9.10075300 | 1.18284100  | 1.04280200  |
| H | -9.88603500 | 2.85354100  | -0.45466000 |
| C | -7.17440100 | 1.21134600  | -1.84628900 |
| H | -6.18216000 | 0.92658800  | -1.48798600 |
| H | -7.64182300 | 0.33015500  | -2.29893700 |
| H | -7.05672200 | 1.98248100  | -2.61432700 |

|                                                   |                              |
|---------------------------------------------------|------------------------------|
| DFT M11/Def2TZVP, solvent acetonitrile, SMD model |                              |
| Total electronic energy=                          | -825.150020 $E_0$            |
| Sum of electronic and zero-point Energies=        | -824.838781 $E_0 + E_{ZPE}$  |
| Sum of electronic and thermal Energies=           | -824.821707 $E_0 + E_{tot}$  |
| Sum of electronic and thermal Enthalpies=         | -824.820763 $E_0 + H_{corr}$ |
| Sum of electronic and thermal Free Energies=      | -824.876853 $E_0 + G_{corr}$ |
| Zero-point correction ( <i>unscaled</i> ) =       | 0.311239                     |
| Number of imaginary vibrational frequencies = 0   |                              |

### 1g (conformation 1g-A)

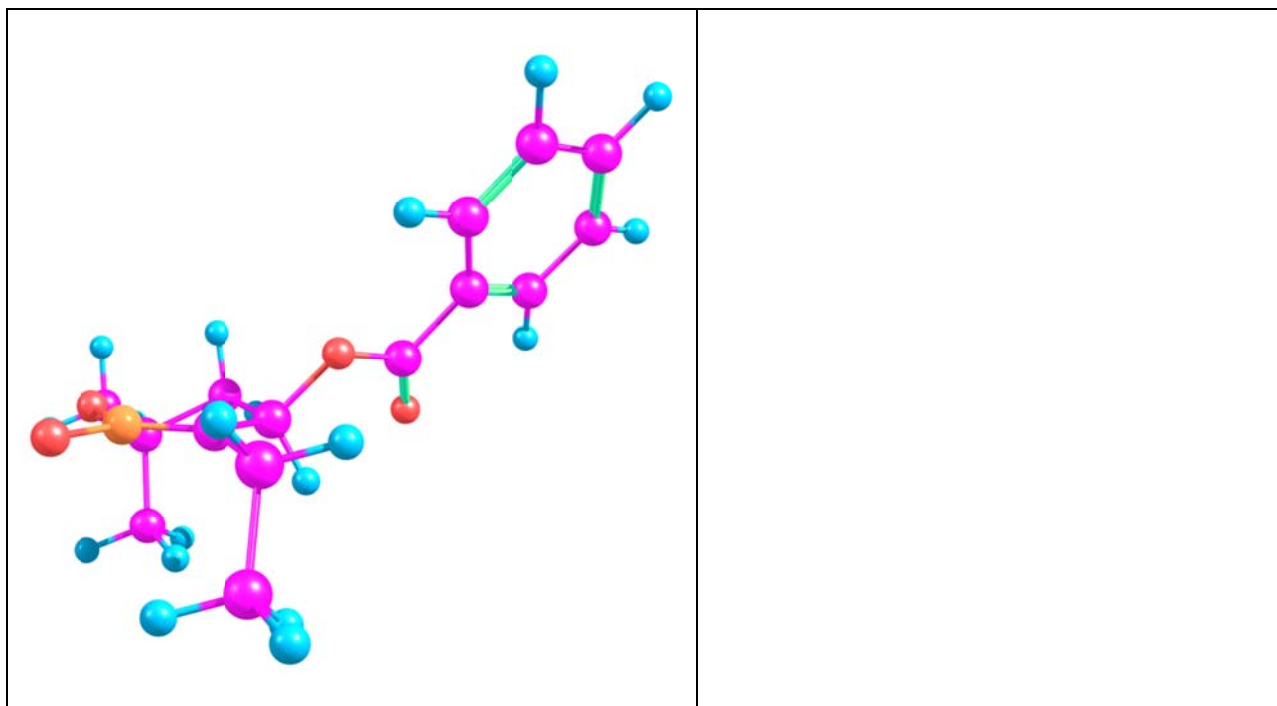

Charge 0; multiplicity 1

|   |              |             |             |
|---|--------------|-------------|-------------|
| H | -8.69816900  | 3.74317800  | 1.85813800  |
| H | -7.82819000  | 2.32656900  | 2.48986000  |
| C | -8.46189700  | 2.17631600  | 0.39841900  |
| C | -8.37900400  | 0.66482800  | 0.26585400  |
| O | -7.21192200  | 2.71344400  | -0.13644000 |
| N | -6.05758100  | 2.25507400  | 0.49218100  |
| C | -6.00218800  | 1.07585200  | 1.01646800  |
| C | -7.18464800  | 0.15540300  | 1.04999400  |
| C | -8.64465300  | 2.65038800  | 1.83462600  |
| H | -8.24460400  | 0.41509300  | -0.79269000 |
| H | -7.44867600  | -0.01166000 | 2.10282600  |
| O | -5.13558000  | 3.09533500  | 0.47065500  |
| H | -9.58106800  | 2.24402800  | 2.23039000  |
| C | -9.52576000  | 2.75486200  | -0.51345000 |
| H | -10.50837400 | 2.39686000  | -0.19051100 |
| H | -9.51517400  | 3.84810800  | -0.46204700 |
| H | -9.35613000  | 2.44051100  | -1.54791800 |
| H | -9.29824100  | 0.19598000  | 0.62566500  |
| C | -4.75736800  | 0.71330500  | 1.76113600  |
| C | -4.74100100  | 1.39890100  | 3.13263700  |
| H | -3.88489400  | 1.01797300  | 1.17557800  |
| H | -4.73044100  | -0.37382400 | 1.87691500  |
| H | -3.82932900  | 1.14209500  | 3.68060300  |
| H | -4.77915500  | 2.48662800  | 3.01392600  |
| H | -5.60156100  | 1.08196100  | 3.73261800  |
| O | -6.72548000  | -1.10756200 | 0.51614600  |
| C | -7.43016000  | -2.19362900 | 0.85646900  |

|   |             |             |             |
|---|-------------|-------------|-------------|
| O | -8.39871100 | -2.14856300 | 1.57465500  |
| C | -6.88808000 | -3.44582400 | 0.25740600  |
| C | -7.54964400 | -4.63770500 | 0.53142200  |
| C | -5.75682700 | -3.43886700 | -0.55168800 |
| C | -7.07969200 | -5.82522500 | -0.00409300 |
| H | -8.43188800 | -4.61961400 | 1.16591500  |
| C | -5.28944500 | -4.62962600 | -1.08528400 |
| H | -5.24588400 | -2.50384900 | -0.76155900 |
| C | -5.94972300 | -5.82043500 | -0.81235200 |
| H | -7.59517100 | -6.75830700 | 0.20831000  |
| H | -4.40556700 | -4.62875500 | -1.71790000 |
| H | -5.58059400 | -6.75281400 | -1.23298200 |

|                                                   |             |                  |
|---------------------------------------------------|-------------|------------------|
| DFT M11/Def2TZVP, solvent acetonitrile, SMD model |             |                  |
| Total electronic energy=                          | -938.516370 | $E_0$            |
| Sum of electronic and zero-point Energies=        | -938.194702 | $E_0 + E_{ZPE}$  |
| Sum of electronic and thermal Energies=           | -938.175728 | $E_0 + E_{tot}$  |
| Sum of electronic and thermal Enthalpies=         | -938.174784 | $E_0 + H_{corr}$ |
| Sum of electronic and thermal Free Energies=      | -938.237178 | $E_0 + G_{corr}$ |
| Zero-point correction ( <i>unscaled</i> ) =       | 0.321668    |                  |
| Number of imaginary vibrational frequencies =     | 0           |                  |

**1g (conformation 1g-B)**

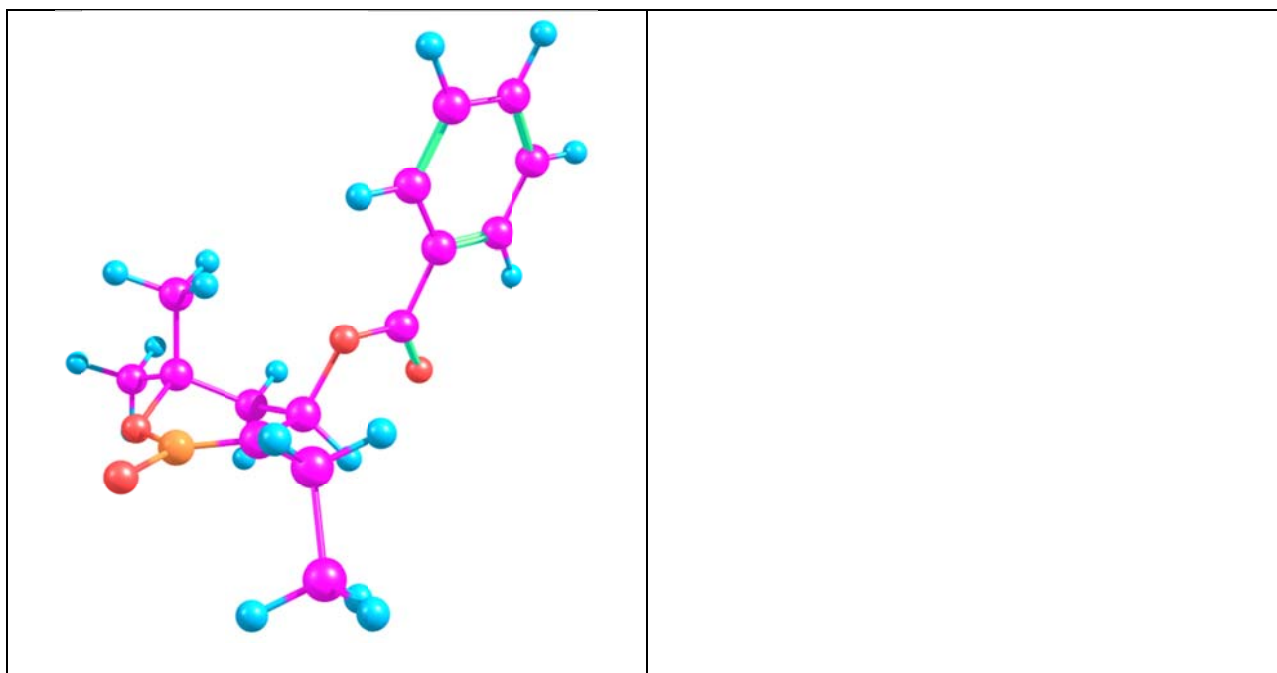

Charge 0; multiplicity 1

|   |             |             |             |
|---|-------------|-------------|-------------|
| C | -8.80264400 | 2.40722000  | -1.53289800 |
| C | -7.75475100 | 1.63844200  | -0.75076400 |
| C | -8.39683900 | 0.76186100  | 0.31387900  |
| O | -7.01270500 | 2.68017100  | -0.04532700 |
| N | -6.07212800 | 2.23509300  | 0.87617500  |
| C | -6.17642000 | 1.08360400  | 1.45508700  |
| C | -7.33993200 | 0.17205100  | 1.22392400  |
| O | -5.17453000 | 3.07709500  | 1.07852000  |
| H | -9.40950400 | 1.70030000  | -2.10772500 |
| H | -8.32245100 | 3.10316900  | -2.22777800 |
| H | -8.98258000 | -0.03772700 | -0.14870700 |
| H | -7.76844800 | -0.09270500 | 2.19681500  |
| H | -9.07505900 | 1.37974900  | 0.91235500  |
| H | -9.45582200 | 2.96594100  | -0.85549900 |
| C | -6.80956500 | 0.89287800  | -1.68487100 |
| H | -5.94748200 | 0.47566900  | -1.15688200 |
| H | -7.34670600 | 0.06676400  | -2.16281000 |
| H | -6.45101600 | 1.57614700  | -2.46102900 |
| C | -5.12515300 | 0.71350300  | 2.45146600  |
| C | -5.36167000 | 1.41017900  | 3.79587100  |
| H | -4.14470100 | 0.99278800  | 2.05272700  |
| H | -5.14726100 | -0.37359500 | 2.57756100  |
| H | -4.58018500 | 1.13604100  | 4.51112700  |
| H | -5.34889400 | 2.49709300  | 3.66823900  |
| H | -6.32947900 | 1.11902700  | 4.21838500  |
| O | -6.78325000 | -1.04308300 | 0.65605100  |
| C | -7.49970700 | -2.16224200 | 0.81125700  |

|   |             |             |             |
|---|-------------|-------------|-------------|
| O | -8.54118600 | -2.19834700 | 1.42021700  |
| C | -6.87279200 | -3.34312800 | 0.15248000  |
| C | -7.48871500 | -4.57979600 | 0.30865100  |
| C | -5.71166200 | -3.22528100 | -0.60413000 |
| C | -6.94069200 | -5.70249400 | -0.28888300 |
| H | -8.39661900 | -4.64719500 | 0.90233100  |
| C | -5.16799400 | -4.35100100 | -1.20289600 |
| H | -5.23828200 | -2.25480200 | -0.72352700 |
| C | -5.78053200 | -5.58724800 | -1.04450300 |
| H | -7.41873100 | -6.67094800 | -0.16639000 |
| H | -4.26137300 | -4.26389400 | -1.79604900 |
| H | -5.35029100 | -6.46853800 | -1.51437600 |

|                                                   |             |                  |
|---------------------------------------------------|-------------|------------------|
| DFT M11/Def2TZVP, solvent acetonitrile, SMD model |             |                  |
| Total electronic energy=                          | -938.517407 | $E_0$            |
| Sum of electronic and zero-point Energies=        | -938.195781 | $E_0 + E_{ZPE}$  |
| Sum of electronic and thermal Energies=           | -938.176841 | $E_0 + E_{tot}$  |
| Sum of electronic and thermal Enthalpies=         | -938.175897 | $E_0 + H_{corr}$ |
| Sum of electronic and thermal Free Energies=      | -938.238453 | $E_0 + G_{corr}$ |
| Zero-point correction ( <i>unscaled</i> ) =       | 0.321627    |                  |
| Number of imaginary vibrational frequencies =     | 0           |                  |

*trans*-5ba-A

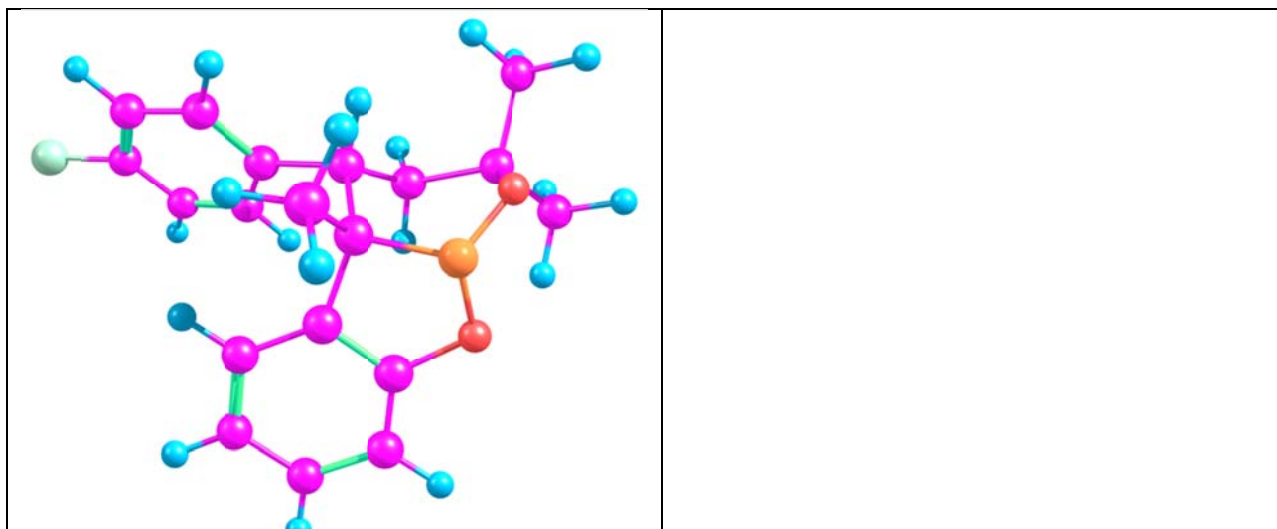

Charge 0; multiplicity 1

|   |             |             |             |
|---|-------------|-------------|-------------|
| O | 2.93581700  | -0.94189500 | 0.00986600  |
| O | 3.03713400  | 1.25312800  | 0.62758900  |
| C | 1.04010900  | -0.00880200 | 1.14308400  |
| N | 2.55069600  | 0.04687900  | 1.02918300  |
| C | 0.68794000  | 0.13004100  | 2.61564800  |
| H | 1.20103100  | -0.63898500 | 3.20009300  |
| H | 0.98301100  | 1.11920500  | 2.98367400  |
| H | -0.39206800 | 0.01164600  | 2.75311400  |
| C | 0.39708500  | 1.12090700  | 0.28939300  |
| H | 0.50500400  | 2.03937900  | 0.87873100  |
| C | 2.59640800  | 1.79671900  | -0.67199100 |
| C | 1.20173200  | 1.26796300  | -0.99837600 |
| H | 1.27466900  | 0.30350400  | -1.51555400 |
| H | 0.71191100  | 1.96895600  | -1.68292900 |
| C | -1.08135100 | 0.89719500  | 0.07151400  |
| C | -1.99898000 | 1.36283900  | 1.00957300  |
| C | -1.56169700 | 0.21430800  | -1.04281700 |
| C | -3.35935000 | 1.14198800  | 0.85858100  |
| H | -1.64238900 | 1.91576400  | 1.87688500  |
| C | -2.91869500 | -0.01340200 | -1.21383500 |
| H | -0.87027900 | -0.16018000 | -1.79418200 |
| C | -3.80275000 | 0.44961100  | -0.25488600 |
| H | -4.06875300 | 1.50941100  | 1.59486500  |
| H | -3.28635900 | -0.54855000 | -2.08498200 |
| C | 3.61637800  | 1.43219600  | -1.74111400 |
| H | 4.61046100  | 1.78766000  | -1.44882800 |
| H | 3.65410800  | 0.35309600  | -1.90247400 |
| H | 3.33806400  | 1.92167300  | -2.68166100 |
| C | 2.59415200  | 3.30212800  | -0.44837400 |
| H | 1.84077200  | 3.59813800  | 0.28830600  |



|    |             |             |             |
|----|-------------|-------------|-------------|
| H  | 3.57746600  | 3.62527900  | -0.09071000 |
| H  | 2.38299700  | 3.81183500  | -1.39393500 |
| Cl | -5.51200500 | 0.16350700  | -0.45856000 |
| C  | 1.91178200  | -1.82839800 | -0.05696700 |
| C  | 0.77725300  | -1.38520900 | 0.59811100  |
| C  | 1.96938300  | -3.05274200 | -0.69698700 |
| C  | -0.34713600 | -2.18501400 | 0.65497600  |
| C  | 0.82642600  | -3.84450400 | -0.64777300 |
| H  | 2.87174700  | -3.37889000 | -1.20587700 |
| C  | -0.31710300 | -3.42671200 | 0.02515500  |
| H  | -1.23865700 | -1.84619500 | 1.18073100  |
| H  | 0.83586600  | -4.81543200 | -1.13732900 |
| H  | -1.19003400 | -4.07276300 | 0.05992200  |

|                                                   |                               |
|---------------------------------------------------|-------------------------------|
| DFT M11/Def2TZVP, solvent acetonitrile, SMD model |                               |
| Total electronic energy=                          | -1401.229769 $E_0$            |
| Sum of electronic and zero-point Energies=        | -1400.879028 $E_0 + E_{ZPE}$  |
| Sum of electronic and thermal Energies=           | -1400.859471 $E_0 + E_{tot}$  |
| Sum of electronic and thermal Enthalpies=         | -1400.858526 $E_0 + H_{corr}$ |
| Sum of electronic and thermal Free Energies=      | -1400.920543 $E_0 + G_{corr}$ |
| Zero-point correction ( <i>unscaled</i> ) =       | 0.350741                      |
| Number of imaginary vibrational frequencies =     | 0                             |

*trans*-5ba-B

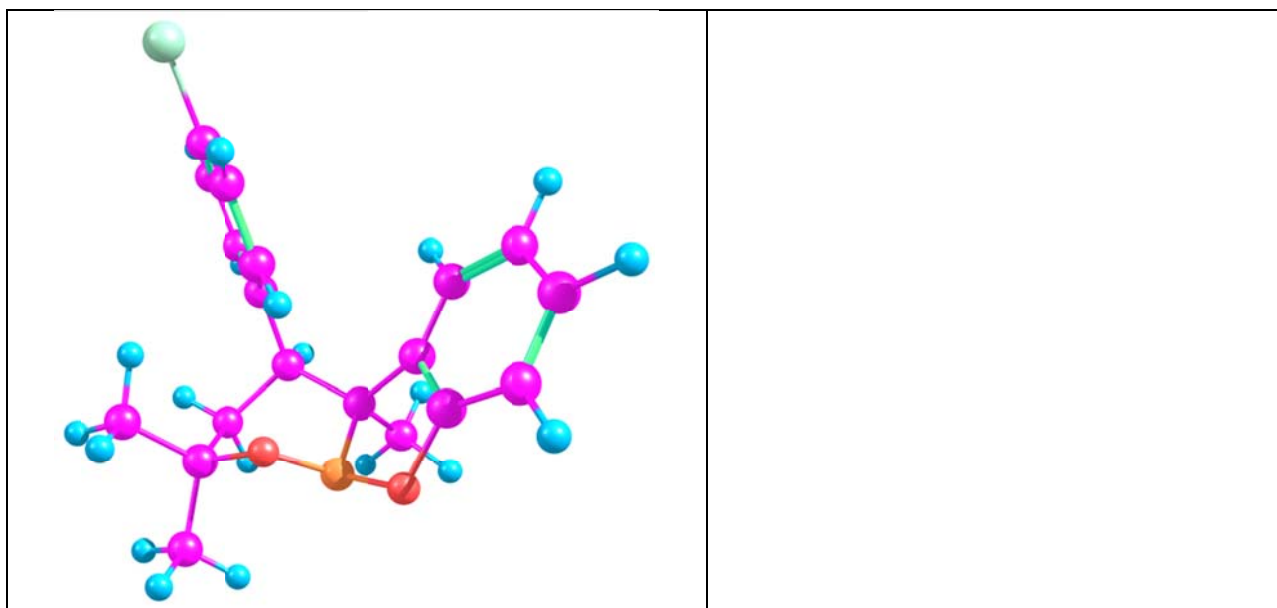

Charge 0; multiplicity 1

|   |             |             |             |
|---|-------------|-------------|-------------|
| O | -2.89637000 | 0.89934200  | -0.80633200 |
| O | -1.69862700 | -0.96034300 | -1.03341200 |
| C | -1.58582400 | 0.22963100  | 1.00299400  |
| N | -2.49865400 | -0.25109900 | -0.09731000 |
| C | -2.47276700 | 0.44922700  | 2.22937300  |
| H | -2.85725700 | -0.50959000 | 2.59393500  |
| H | -1.88768600 | 0.92609300  | 3.02211900  |
| H | -3.31812300 | 1.09817100  | 1.97658000  |
| C | -0.52765300 | -0.86546900 | 1.30022200  |
| H | -0.41051600 | -0.86649200 | 2.38888600  |
| C | -1.55775500 | -2.31986600 | -0.54603200 |
| C | -1.13570300 | -2.23700200 | 0.93569800  |
| H | -0.42114000 | -3.03353000 | 1.16854800  |
| H | -2.01764900 | -2.38931300 | 1.56943800  |
| C | 0.87714800  | -0.67378200 | 0.74754400  |
| C | 1.93673700  | -1.07520700 | 1.55850500  |
| C | 1.17875500  | -0.15770100 | -0.51147500 |
| C | 3.25582200  | -0.97427100 | 1.14197600  |
| H | 1.72688600  | -1.47751400 | 2.54835500  |
| C | 2.49086100  | -0.04220500 | -0.94420600 |
| H | 0.37854400  | 0.14565400  | -1.17861000 |
| C | 3.51747800  | -0.45274000 | -0.11129300 |
| H | 4.06977800  | -1.29165500 | 1.78778900  |
| H | 2.71390700  | 0.36218600  | -1.92773100 |
| C | -0.49252000 | -2.95253800 | -1.42749500 |
| H | -0.77634900 | -2.85804400 | -2.48140600 |
| H | 0.48593400  | -2.49041400 | -1.27860600 |
| H | -0.41550100 | -4.01720300 | -1.18337200 |
| C | -2.87771000 | -3.06309400 | -0.70472700 |

|    |             |             |             |
|----|-------------|-------------|-------------|
| H  | -3.67672100 | -2.55247300 | -0.15938800 |
| H  | -3.14910800 | -3.13071300 | -1.76389700 |
| H  | -2.77549400 | -4.07790800 | -0.30437200 |
| Cl | 5.17002400  | -0.30773600 | -0.65374500 |
| C  | -1.95610900 | 1.88086900  | -0.58466400 |
| C  | -1.12201500 | 1.55884000  | 0.46544700  |
| C  | -1.87088800 | 3.06721900  | -1.28143100 |
| C  | -0.14805700 | 2.44966900  | 0.86794200  |
| C  | -0.87863500 | 3.95664700  | -0.87629900 |
| H  | -2.54383200 | 3.29163800  | -2.10391100 |
| C  | -0.02806600 | 3.65701400  | 0.18250300  |
| H  | 0.51478700  | 2.21155300  | 1.69754400  |
| H  | -0.76986000 | 4.90249800  | -1.40129800 |
| H  | 0.73615000  | 4.37096800  | 0.47763600  |

|                                                   |                               |
|---------------------------------------------------|-------------------------------|
| DFT M11/Def2TZVP, solvent acetonitrile, SMD model |                               |
| Total electronic energy=                          | -1401.224873 $E_0$            |
| Sum of electronic and zero-point Energies=        | -1400.873827 $E_0 + E_{ZPE}$  |
| Sum of electronic and thermal Energies=           | -1400.854406 $E_0 + E_{tot}$  |
| Sum of electronic and thermal Enthalpies=         | -1400.853462 $E_0 + H_{corr}$ |
| Sum of electronic and thermal Free Energies=      | -1400.915230 $E_0 + G_{corr}$ |
| Zero-point correction ( <i>unscaled</i> ) =       | 0.351046                      |
| Number of imaginary vibrational frequencies =     | 0                             |

*trans*-5ba-C

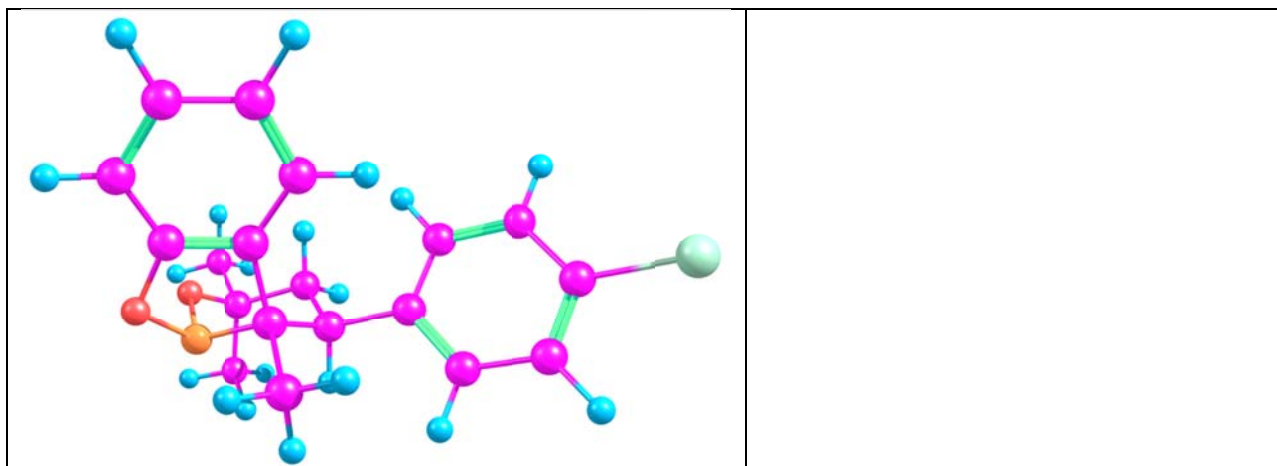

Charge 0; multiplicity 1

|    |             |             |             |
|----|-------------|-------------|-------------|
| O  | 3.13885500  | -0.68195700 | 1.14293300  |
| O  | 2.84250200  | 0.96289500  | -0.25371600 |
| C  | 0.96421500  | 0.02317300  | 0.91932900  |
| N  | 2.38882800  | 0.50854300  | 1.02369900  |
| C  | 0.53758700  | -0.31217900 | 2.35189800  |
| H  | 0.47288400  | 0.60156600  | 2.95235600  |
| H  | -0.43811200 | -0.80553100 | 2.34078700  |
| H  | 1.25990300  | -0.99218900 | 2.81310100  |
| C  | 0.09109600  | 1.15697600  | 0.33481000  |
| H  | 0.10649800  | 1.93882600  | 1.10409500  |
| C  | 2.15037500  | 2.14515800  | -0.70490900 |
| C  | 0.70018200  | 1.73285400  | -0.93776300 |
| H  | 0.70187300  | 0.98024300  | -1.73591300 |
| H  | 0.10990500  | 2.59136500  | -1.27802700 |
| C  | -1.36701500 | 0.76113900  | 0.17316100  |
| C  | -2.23693800 | 0.88177300  | 1.25559300  |
| C  | -1.88668500 | 0.31982800  | -1.04028900 |
| C  | -3.57739900 | 0.54847000  | 1.14812600  |
| H  | -1.85896600 | 1.25478600  | 2.20546400  |
| C  | -3.22612900 | -0.01849200 | -1.16896300 |
| H  | -1.24491000 | 0.22817200  | -1.91247400 |
| C  | -4.05660300 | 0.09572300  | -0.06904600 |
| H  | -4.24565700 | 0.64740800  | 1.99894300  |
| H  | -3.62059200 | -0.36425800 | -2.12028500 |
| C  | 2.82667500  | 2.49174900  | -2.02074500 |
| H  | 3.88038100  | 2.73804700  | -1.85379600 |
| H  | 2.76299800  | 1.64772800  | -2.71535600 |
| H  | 2.32993300  | 3.35742100  | -2.47117500 |
| C  | 2.31466400  | 3.28706800  | 0.29253200  |
| H  | 1.89443000  | 3.05250500  | 1.27377400  |
| H  | 3.37963400  | 3.50855800  | 0.42007200  |
| H  | 1.81646500  | 4.18212400  | -0.09518900 |
| Cl | -5.74314900 | -0.32335500 | -0.22209500 |

|   |             |             |             |
|---|-------------|-------------|-------------|
| C | 2.48018600  | -1.63868400 | 0.39631400  |
| C | 1.16335600  | -1.27484100 | 0.15892700  |
| C | 3.03133600  | -2.82655800 | -0.02136700 |
| C | 0.33746600  | -2.14731200 | -0.52001800 |
| C | 2.19277500  | -3.68899700 | -0.72750300 |
| H | 4.06797900  | -3.07410300 | 0.18816800  |
| C | 0.86912700  | -3.35651600 | -0.97507200 |
| H | -0.70998100 | -1.91768700 | -0.68888700 |
| H | 2.58695700  | -4.63655500 | -1.08639200 |
| H | 0.23318800  | -4.04805300 | -1.52137100 |

|                                                   |                               |
|---------------------------------------------------|-------------------------------|
| DFT M11/Def2TZVP, solvent acetonitrile, SMD model |                               |
| Total electronic energy=                          | -1401.227013 $E_0$            |
| Sum of electronic and zero-point Energies=        | -1400.875862 $E_0 + E_{ZPE}$  |
| Sum of electronic and thermal Energies=           | -1400.856366 $E_0 + E_{tot}$  |
| Sum of electronic and thermal Enthalpies=         | -1400.855422 $E_0 + H_{corr}$ |
| Sum of electronic and thermal Free Energies=      | -1400.917250 $E_0 + G_{corr}$ |
| Zero-point correction ( <i>unscaled</i> ) =       | 0.351151                      |
| Number of imaginary vibrational frequencies =     | 0                             |

*trans*-5ba-D

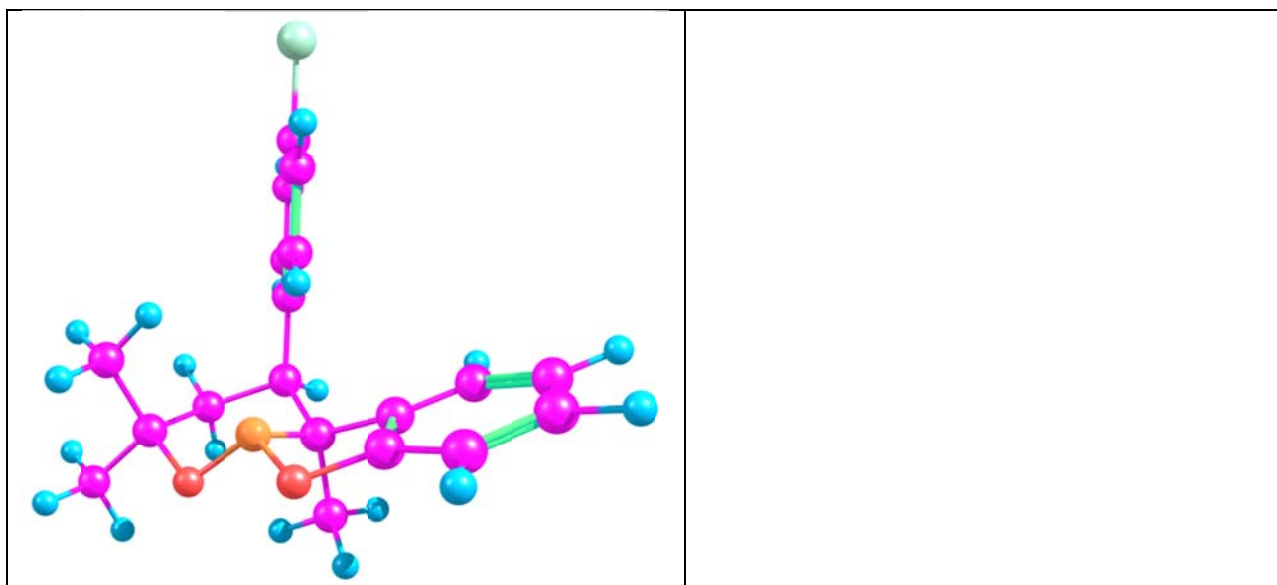

Charge 0; multiplicity 1

|   |             |             |             |
|---|-------------|-------------|-------------|
| O | -2.56808000 | 0.71925000  | -1.21017700 |
| O | -2.48335700 | -1.48317700 | -0.64534800 |
| C | -1.46893800 | 0.11307900  | 0.74291100  |
| N | -1.73250400 | -0.31528300 | -0.65606100 |
| C | -2.70105300 | -0.01487500 | 1.65140000  |
| H | -3.55753200 | 0.49348900  | 1.19693800  |
| H | -2.97432400 | -1.05549000 | 1.83560400  |
| H | -2.47552400 | 0.46986000  | 2.60676200  |
| C | -0.34106600 | -0.81039700 | 1.21584000  |
| H | -0.26482300 | -0.69287200 | 2.30307100  |
| C | -1.53531100 | -2.56198700 | -0.36220600 |
| C | -0.81401600 | -2.27630000 | 0.97532600  |
| H | 0.04839400  | -2.94798700 | 1.04488200  |
| H | -1.49384600 | -2.55083900 | 1.78760300  |
| C | 1.05330600  | -0.54533800 | 0.66899700  |
| C | 2.12366300  | -1.04678100 | 1.41042400  |
| C | 1.33997300  | 0.14310900  | -0.50642200 |
| C | 3.43642300  | -0.87549100 | 1.00519100  |
| H | 1.92135100  | -1.58503200 | 2.33547200  |
| C | 2.65025900  | 0.32901100  | -0.92759900 |
| H | 0.53706800  | 0.53500700  | -1.12213000 |
| C | 3.68497700  | -0.18267900 | -0.16738500 |
| H | 4.25823100  | -1.27039400 | 1.59595400  |
| H | 2.86185600  | 0.86841600  | -1.84678300 |
| C | -0.57127200 | -2.72333800 | -1.53122200 |
| H | -1.13752900 | -2.87165300 | -2.45719700 |
| H | 0.07847600  | -1.85408800 | -1.64890800 |
| H | 0.05416800  | -3.60617800 | -1.36010900 |
| C | -2.41328800 | -3.79258600 | -0.22189000 |
| H | -3.16588900 | -3.63662200 | 0.55833300  |

|    |             |             |             |
|----|-------------|-------------|-------------|
| H  | -2.91815800 | -4.00931700 | -1.16927900 |
| H  | -1.79584900 | -4.65435800 | 0.05190800  |
| Cl | 5.33288800  | 0.04938600  | -0.69320800 |
| C  | -2.01363400 | 1.85528500  | -0.67295700 |
| C  | -1.26129300 | 1.58129800  | 0.46469300  |
| C  | -2.16709100 | 3.12868600  | -1.17438400 |
| C  | -0.63048400 | 2.60219200  | 1.13949600  |
| C  | -1.52244600 | 4.15575300  | -0.48541800 |
| H  | -2.75665400 | 3.31881600  | -2.06668200 |
| C  | -0.76057200 | 3.90200700  | 0.64789700  |
| H  | -0.04379900 | 2.39901700  | 2.03332900  |
| H  | -1.61441500 | 5.17509600  | -0.85236300 |
| H  | -0.26301600 | 4.72325400  | 1.15668600  |

|                                                   |                               |
|---------------------------------------------------|-------------------------------|
| DFT M11/Def2TZVP, solvent acetonitrile, SMD model |                               |
| Total electronic energy=                          | -1401.214236 $E_0$            |
| Sum of electronic and zero-point Energies=        | -1400.863358 $E_0 + E_{ZPE}$  |
| Sum of electronic and thermal Energies=           | -1400.843787 $E_0 + E_{tot}$  |
| Sum of electronic and thermal Enthalpies=         | -1400.842842 $E_0 + H_{corr}$ |
| Sum of electronic and thermal Free Energies=      | -1400.904812 $E_0 + G_{corr}$ |
| Zero-point correction ( <i>unscaled</i> ) =       | 0.350878                      |
| Number of imaginary vibrational frequencies =     | 0                             |

*trans*-5ba-E

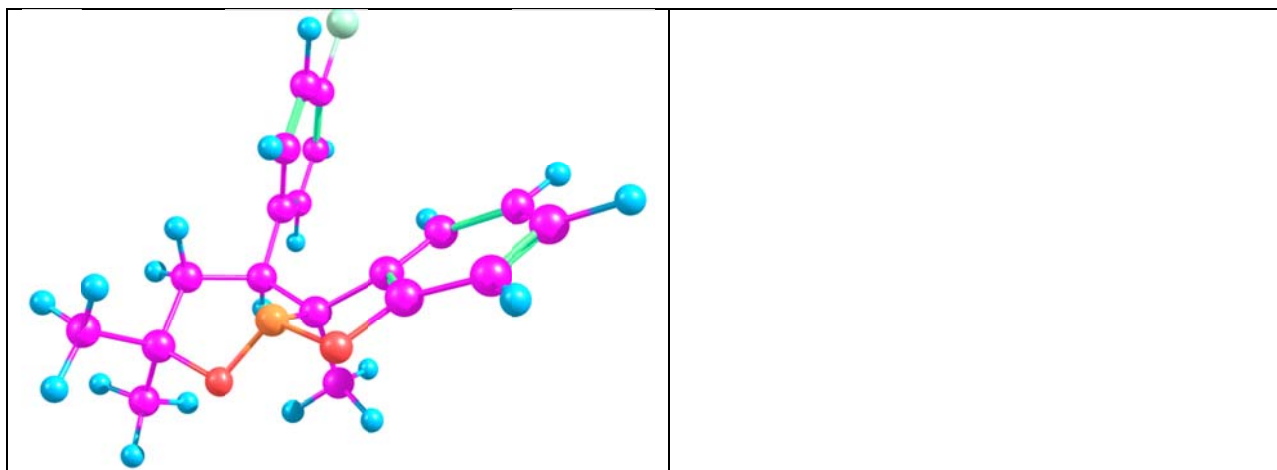

Charge 0; multiplicity 1

|    |             |             |             |
|----|-------------|-------------|-------------|
| O  | -2.57007700 | 1.61816000  | -0.61957400 |
| O  | -3.20850200 | -0.52579300 | -0.18018000 |
| C  | -1.20506100 | 0.27373800  | 0.68899300  |
| N  | -2.10968500 | 0.26399800  | -0.49301300 |
| C  | -1.95634400 | 0.46379900  | 2.01331100  |
| H  | -2.59741100 | 1.35055500  | 1.97531500  |
| H  | -2.56793400 | -0.40863000 | 2.25228900  |
| H  | -1.21287800 | 0.60200900  | 2.80582200  |
| C  | -0.51573600 | -1.12289100 | 0.65710300  |
| H  | -0.63200000 | -1.55067000 | 1.65775700  |
| C  | -2.78573100 | -1.92029000 | -0.39627200 |
| C  | -1.24537800 | -2.03391200 | -0.36147100 |
| H  | -0.86476100 | -1.81288500 | -1.36255200 |
| H  | -0.99541100 | -3.07821200 | -0.14391800 |
| C  | 0.96467400  | -1.06538900 | 0.35562300  |
| C  | 1.89729500  | -1.44325000 | 1.31337900  |
| C  | 1.42272800  | -0.59993000 | -0.87562900 |
| C  | 3.26047500  | -1.35948800 | 1.06126300  |
| H  | 1.55556300  | -1.80681000 | 2.28054600  |
| C  | 2.77720700  | -0.50733000 | -1.14578600 |
| H  | 0.70729500  | -0.28458700 | -1.63391800 |
| C  | 3.68294800  | -0.88947300 | -0.16807100 |
| H  | 3.98501700  | -1.65638700 | 1.81431400  |
| H  | 3.13068200  | -0.13844800 | -2.10459100 |
| C  | -3.30173400 | -2.35005900 | -1.75979300 |
| H  | -2.96195300 | -3.36635000 | -1.98891000 |
| H  | -4.39668900 | -2.33200500 | -1.77612200 |
| H  | -2.92027700 | -1.67103300 | -2.53049700 |
| C  | -3.43607900 | -2.71419800 | 0.72408300  |
| H  | -4.50446700 | -2.48048100 | 0.78138100  |
| H  | -3.32430900 | -3.78486900 | 0.52333100  |
| H  | -2.97068200 | -2.49128400 | 1.68976900  |
| Cl | 5.39263000  | -0.77524500 | -0.49917300 |



|   |             |            |             |
|---|-------------|------------|-------------|
| C | -1.43008100 | 2.33039200 | -0.33843900 |
| C | -0.50346000 | 1.57587900 | 0.37589400  |
| C | -1.21205000 | 3.64258300 | -0.69665200 |
| C | 0.68906900  | 2.14922300 | 0.76573100  |
| C | 0.00015200  | 4.20654000 | -0.30453200 |
| H | -1.95216000 | 4.20473200 | -1.25880300 |
| C | 0.93972200  | 3.47457300 | 0.41084000  |
| H | 1.42063200  | 1.58008800 | 1.33591600  |
| H | 0.21316300  | 5.23899700 | -0.57054600 |
| H | 1.87869200  | 3.93998300 | 0.69838600  |

|                                                   |              |                  |
|---------------------------------------------------|--------------|------------------|
| DFT M11/Def2TZVP, solvent acetonitrile, SMD model |              |                  |
| Total electronic energy=                          | -1401.209477 | $E_0$            |
| Sum of electronic and zero-point Energies=        | -1400.858557 | $E_0 + E_{ZPE}$  |
| Sum of electronic and thermal Energies=           | -1400.839018 | $E_0 + E_{tot}$  |
| Sum of electronic and thermal Enthalpies=         | -1400.838074 | $E_0 + H_{corr}$ |
| Sum of electronic and thermal Free Energies=      | -1400.900375 | $E_0 + G_{corr}$ |
| Zero-point correction ( <i>unscaled</i> ) =       | 0.350920     |                  |
| Number of imaginary vibrational frequencies =     | 0            |                  |

*cis-5ba-A*

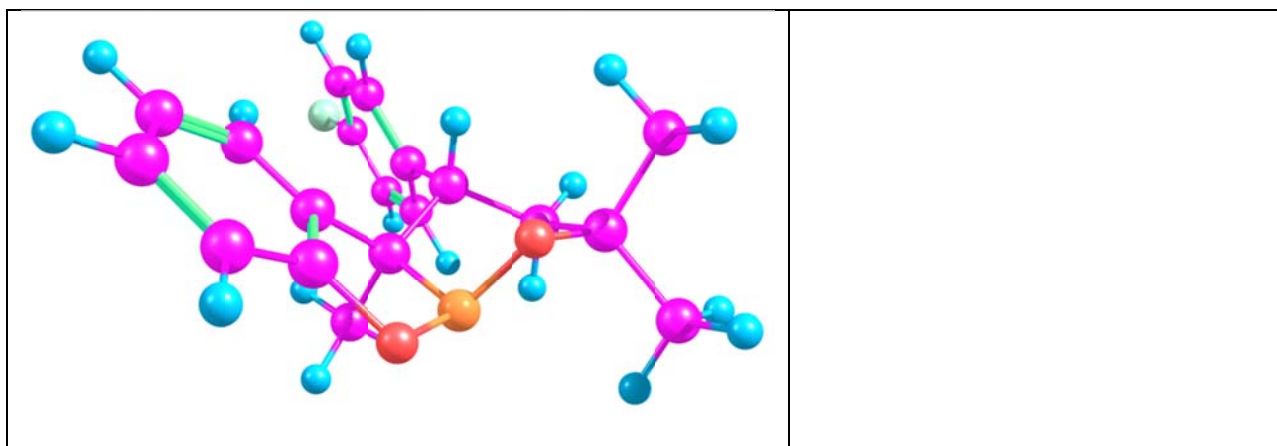

Charge 0; multiplicity 1

|    |             |             |             |
|----|-------------|-------------|-------------|
| O  | 3.21860100  | -0.38725800 | -1.01224800 |
| O  | 2.58690000  | 1.19921400  | 0.40211500  |
| C  | 0.93288400  | -0.09385500 | -0.67774500 |
| N  | 2.25234300  | 0.62435200  | -0.85320300 |
| C  | 0.35235700  | -0.25812600 | -2.07864000 |
| H  | 1.09737600  | -0.72955700 | -2.72869700 |
| H  | -0.53593800 | -0.89584700 | -2.04870900 |
| H  | 0.08396600  | 0.71542600  | -2.50220900 |
| C  | 0.06557700  | 0.76785500  | 0.28160300  |
| H  | 0.36076800  | 0.49831900  | 1.30135300  |
| C  | 1.88744500  | 2.46650000  | 0.51313400  |
| C  | 0.43486700  | 2.23795400  | 0.05293600  |
| H  | 0.33510000  | 2.48602500  | -1.01102700 |
| H  | -0.23814400 | 2.89525700  | 0.61329500  |
| C  | -1.41932600 | 0.49842600  | 0.16358900  |
| C  | -2.04544400 | -0.34353800 | 1.07772300  |
| C  | -2.19883100 | 1.09866800  | -0.82348800 |
| C  | -3.40553500 | -0.60669000 | 1.00446800  |
| H  | -1.45872800 | -0.79762800 | 1.87398200  |
| C  | -3.55895000 | 0.84893000  | -0.91333100 |
| H  | -1.74337600 | 1.77951100  | -1.53863900 |
| C  | -4.14658600 | -0.00823700 | 0.00194700  |
| H  | -3.88510800 | -1.26473900 | 1.72368000  |
| H  | -4.15988000 | 1.32036200  | -1.68604300 |
| C  | 2.58846100  | 3.51937000  | -0.32987600 |
| H  | 3.60467400  | 3.69102100  | 0.04089400  |
| H  | 2.63624400  | 3.19847200  | -1.37527700 |
| H  | 2.03262300  | 4.46239300  | -0.28002000 |
| C  | 1.95576000  | 2.80066700  | 1.99330200  |
| H  | 1.40695200  | 2.06052900  | 2.58572300  |
| H  | 2.99842200  | 2.81711200  | 2.32769700  |
| H  | 1.51619100  | 3.78809100  | 2.16686500  |
| Cl | -5.85857900 | -0.32749200 | -0.10375200 |
| C  | 2.74281500  | -1.52024600 | -0.38872300 |

|   |             |             |             |
|---|-------------|-------------|-------------|
| C | 1.38789800  | -1.42706500 | -0.13470400 |
| C | 3.49482600  | -2.63523300 | -0.09366100 |
| C | 0.72647600  | -2.49321100 | 0.43955500  |
| C | 2.82066000  | -3.70257200 | 0.49683000  |
| H | 4.55844900  | -2.67540400 | -0.31006500 |
| C | 1.45878700  | -3.63624500 | 0.76188700  |
| H | -0.34369700 | -2.45279000 | 0.62541500  |
| H | 3.37522200  | -4.60192900 | 0.75325800  |
| H | 0.95748100  | -4.48501100 | 1.21928700  |

|                                                   |              |                  |
|---------------------------------------------------|--------------|------------------|
| DFT M11/Def2TZVP, solvent acetonitrile, SMD model |              |                  |
| Total electronic energy=                          | -1401.229975 | $E_0$            |
| Sum of electronic and zero-point Energies=        | -1400.878451 | $E_0 + E_{ZPE}$  |
| Sum of electronic and thermal Energies=           | -1400.859134 | $E_0 + E_{tot}$  |
| Sum of electronic and thermal Enthalpies=         | -1400.858190 | $E_0 + H_{corr}$ |
| Sum of electronic and thermal Free Energies=      | -1400.919460 | $E_0 + G_{corr}$ |
| Zero-point correction ( <i>unscaled</i> ) =       | 0.351525     |                  |
| Number of imaginary vibrational frequencies = 0   |              |                  |

*cis-5ba-B*

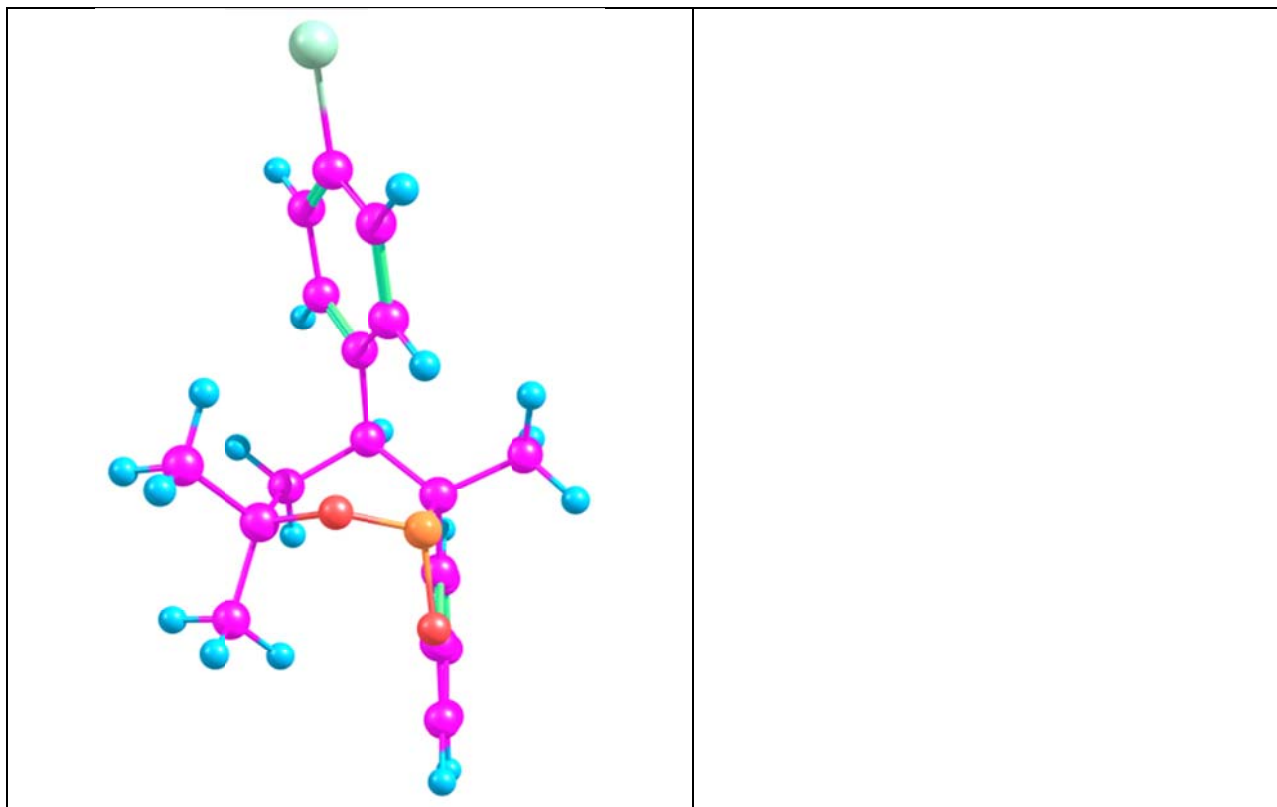

Charge 0; multiplicity 1

|   |             |             |             |
|---|-------------|-------------|-------------|
| O | 2.46450100  | 0.73227000  | -1.58036600 |
| O | 0.46645600  | 1.56635200  | -0.84647600 |
| C | 0.95746100  | -0.78983000 | -0.53845900 |
| N | 1.04968100  | 0.45193600  | -1.39900800 |
| C | 0.56994500  | -1.96822000 | -1.42983900 |
| H | 0.58469200  | -2.88519300 | -0.82953200 |
| H | -0.42421700 | -1.84570700 | -1.86393600 |
| H | 1.29817200  | -2.07327200 | -2.24072600 |
| C | 0.00615700  | -0.56560300 | 0.64470200  |
| H | 0.12825900  | -1.45159400 | 1.28030900  |
| C | 0.63761300  | 1.90157700  | 0.57205000  |
| C | 0.50549300  | 0.64329500  | 1.44908800  |
| H | -0.18353400 | 0.84720500  | 2.27492500  |
| H | 1.47615900  | 0.39267600  | 1.88827500  |
| C | -1.47880600 | -0.46398700 | 0.33083900  |
| C | -2.36458800 | -0.74840400 | 1.36893800  |
| C | -2.00856100 | -0.06532600 | -0.89279600 |
| C | -3.73576700 | -0.63976700 | 1.20597600  |
| H | -1.96895100 | -1.06159000 | 2.33415400  |
| C | -3.37983900 | 0.04329300  | -1.07803400 |
| H | -1.35235700 | 0.17806100  | -1.72303500 |
| C | -4.22923200 | -0.24323500 | -0.02489600 |
| H | -4.41393400 | -0.86399600 | 2.02452000  |
| H | -3.78367000 | 0.35341100  | -2.03783000 |
| C | -0.52411700 | 2.85840700  | 0.80797700  |

|    |             |             |             |
|----|-------------|-------------|-------------|
| H  | -0.46093200 | 3.70781600  | 0.11936300  |
| H  | -1.47985700 | 2.34524200  | 0.65610600  |
| H  | -0.48356400 | 3.23356000  | 1.83561100  |
| C  | 1.96039400  | 2.62288700  | 0.79742400  |
| H  | 2.81882000  | 1.95591600  | 0.68581300  |
| H  | 2.05852000  | 3.45853200  | 0.09630800  |
| H  | 1.97447300  | 3.02036100  | 1.81887300  |
| Cl | -5.95409600 | -0.10729600 | -0.25263900 |
| C  | 3.17699200  | -0.07196500 | -0.74391300 |
| C  | 2.38104000  | -0.97306500 | -0.07031500 |
| C  | 4.54768300  | -0.01714200 | -0.57383000 |
| C  | 2.94039000  | -1.86653200 | 0.82029700  |
| C  | 5.10654800  | -0.92135900 | 0.32425700  |
| H  | 5.15426800  | 0.70243800  | -1.11622200 |
| C  | 4.31885000  | -1.83528400 | 1.01695900  |
| H  | 2.31553200  | -2.58104000 | 1.35387400  |
| H  | 6.18159400  | -0.90825100 | 0.48668100  |
| H  | 4.78238900  | -2.53001400 | 1.71203200  |

|                                                   |                               |
|---------------------------------------------------|-------------------------------|
| DFT M11/Def2TZVP, solvent acetonitrile, SMD model |                               |
| Total electronic energy=                          | -1401.223887 $E_0$            |
| Sum of electronic and zero-point Energies=        | -1400.873075 $E_0 + E_{ZPE}$  |
| Sum of electronic and thermal Energies=           | -1400.853623 $E_0 + E_{tot}$  |
| Sum of electronic and thermal Enthalpies=         | -1400.852679 $E_0 + H_{corr}$ |
| Sum of electronic and thermal Free Energies=      | -1400.914306 $E_0 + G_{corr}$ |
| Zero-point correction ( <i>unscaled</i> ) =       | 0.350812                      |
| Number of imaginary vibrational frequencies =     | 0                             |

*cis-5ba-C*

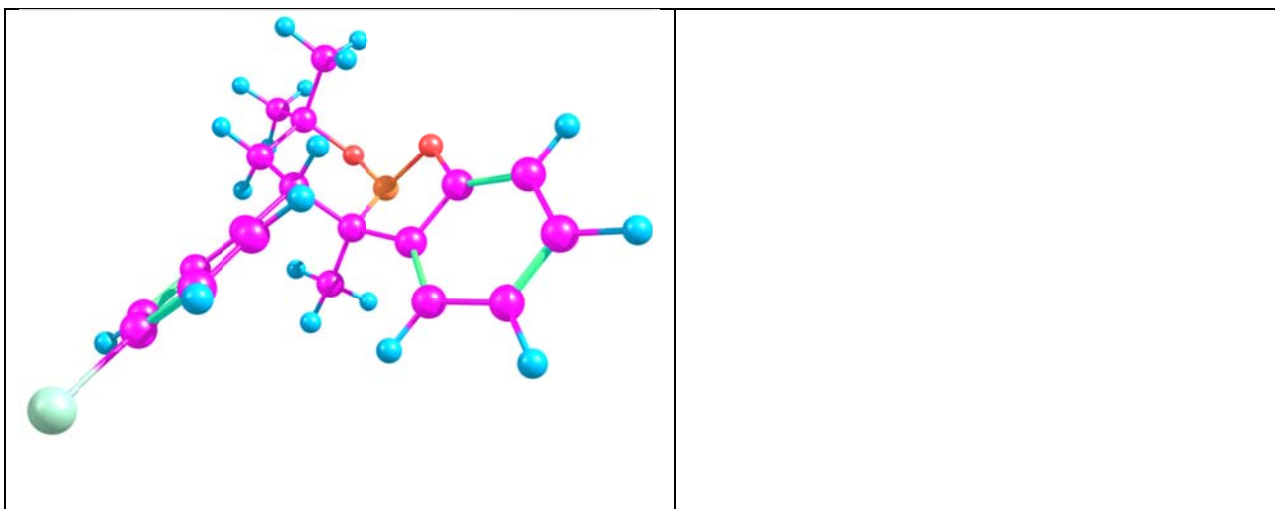

Charge 0; multiplicity 1

|   |             |             |             |
|---|-------------|-------------|-------------|
| O | 2.93506000  | 0.83123500  | -0.26319800 |
| O | 3.01249200  | -1.29065100 | 0.63716800  |
| C | 1.02252200  | 0.08322600  | 0.87970500  |
| N | 2.51636500  | -0.05046700 | 0.85591800  |
| C | 0.53499100  | -0.30528400 | 2.26320500  |
| H | 1.12162800  | 0.22439900  | 3.01912700  |
| H | -0.51670100 | -0.02758300 | 2.38008700  |
| H | 0.63130400  | -1.38278700 | 2.43271500  |
| C | 0.37784500  | -0.72415200 | -0.28361900 |
| H | 0.70076300  | -0.23356700 | -1.20913900 |
| C | 2.44274500  | -2.14641900 | -0.41475500 |
| C | 0.92530400  | -2.14792100 | -0.28084000 |
| H | 0.65835500  | -2.66883000 | 0.64568300  |
| H | 0.49739700  | -2.71435900 | -1.11608100 |
| C | -1.13167000 | -0.64582000 | -0.25527500 |
| C | -1.78381900 | 0.31903700  | -1.01879100 |
| C | -1.90209000 | -1.50850900 | 0.52116100  |
| C | -3.16569100 | 0.43300800  | -1.01028100 |
| H | -1.19648300 | 0.99454000  | -1.63851400 |
| C | -3.28489200 | -1.41069700 | 0.54231700  |
| H | -1.42266100 | -2.27268800 | 1.12854600  |
| C | -3.90097900 | -0.43697400 | -0.22503100 |
| H | -3.66663900 | 1.18665500  | -1.61134900 |
| H | -3.88034500 | -2.08680500 | 1.14952600  |
| C | 3.01521100  | -3.51278900 | -0.07648600 |
| H | 4.10758500  | -3.49782800 | -0.15311900 |
| H | 2.73232900  | -3.80362200 | 0.94024100  |
| H | 2.62464300  | -4.25584600 | -0.77937300 |
| C | 2.92695300  | -1.70848300 | -1.79272000 |
| H | 2.48032400  | -0.77023800 | -2.12574700 |
| H | 4.01500300  | -1.58696300 | -1.77706600 |

|    |             |             |             |
|----|-------------|-------------|-------------|
| H  | 2.67564500  | -2.49270900 | -2.51564300 |
| C  | 2.08033600  | 1.88365700  | -0.15428700 |
| C  | 2.28096200  | 3.14266100  | -0.68207200 |
| C  | 0.94056100  | 1.55407500  | 0.56750700  |
| C  | 1.28142600  | 4.08757700  | -0.45521700 |
| H  | 3.18000700  | 3.38345900  | -1.24212500 |
| C  | -0.03695700 | 2.49660500  | 0.79805300  |
| C  | 0.14304700  | 3.77951700  | 0.27944500  |
| H  | 1.40547400  | 5.09149500  | -0.85431400 |
| H  | -0.93034200 | 2.24139900  | 1.36533800  |
| H  | -0.61178700 | 4.54243600  | 0.44962600  |
| Cl | -5.64110800 | -0.30937100 | -0.20758200 |

|                                                   |              |                  |
|---------------------------------------------------|--------------|------------------|
| DFT M11/Def2TZVP, solvent acetonitrile, SMD model |              |                  |
| Total electronic energy=                          | -1401.227854 | $E_0$            |
| Sum of electronic and zero-point Energies=        | -1400.876989 | $E_0 + E_{ZPE}$  |
| Sum of electronic and thermal Energies=           | -1400.857426 | $E_0 + E_{tot}$  |
| Sum of electronic and thermal Enthalpies=         | -1400.856482 | $E_0 + H_{corr}$ |
| Sum of electronic and thermal Free Energies=      | -1400.918335 | $E_0 + G_{corr}$ |
| Zero-point correction ( <i>unscaled</i> ) =       | 0.350865     |                  |
| Number of imaginary vibrational frequencies =     | 0            |                  |

*cis-5ba-D*

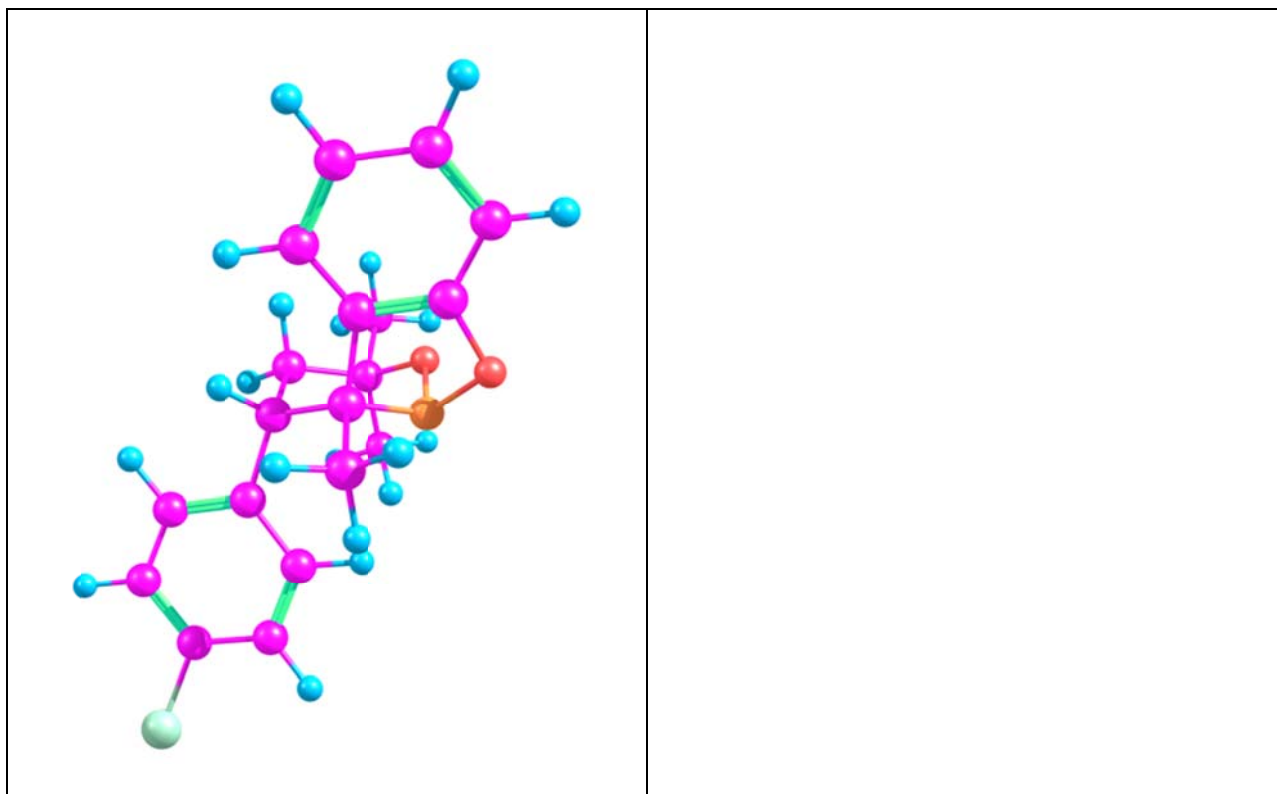

Charge 0; multiplicity 1

|   |             |             |             |
|---|-------------|-------------|-------------|
| O | 2.45641700  | 0.08855900  | -1.87321600 |
| O | 1.64189700  | 1.64173900  | -0.58291000 |
| C | 0.96856500  | -0.63849600 | -0.29867600 |
| N | 1.21947700  | 0.46356900  | -1.28884400 |
| C | 0.53786700  | -1.89310900 | -1.07147700 |
| H | 1.35790300  | -2.25413000 | -1.69815700 |
| H | 0.29020900  | -2.67454900 | -0.34470300 |
| H | -0.32976300 | -1.71919500 | -1.70728800 |
| C | -0.03103000 | -0.22923300 | 0.79028800  |
| H | 0.12861000  | -0.96437100 | 1.58933700  |
| C | 0.65869100  | 2.19792300  | 0.31480000  |
| C | 0.34418100  | 1.14086900  | 1.37380400  |
| H | -0.45282300 | 1.50032800  | 2.03330900  |
| H | 1.24920500  | 1.01467700  | 1.98043200  |
| C | -1.51317700 | -0.32738700 | 0.45114000  |
| C | -2.38636000 | -0.56330700 | 1.51243800  |
| C | -2.06072800 | -0.16519900 | -0.81750100 |
| C | -3.75701300 | -0.63616200 | 1.32730200  |
| H | -1.98036900 | -0.69552200 | 2.51430800  |
| C | -3.43052500 | -0.23805500 | -1.02666900 |
| H | -1.41837200 | 0.02827700  | -1.67185300 |
| C | -4.26532600 | -0.47318300 | 0.05033900  |
| H | -4.42310400 | -0.82316900 | 2.16486200  |
| H | -3.84355200 | -0.11095600 | -2.02344100 |
| C | -0.54410800 | 2.71842900  | -0.46747200 |



|    |             |             |             |
|----|-------------|-------------|-------------|
| H  | -0.25793600 | 3.62620700  | -1.00952200 |
| H  | -0.90228400 | 1.99275400  | -1.19627200 |
| H  | -1.36451800 | 2.96352800  | 0.21601100  |
| C  | 1.38742700  | 3.36360700  | 0.96887600  |
| H  | 2.27596600  | 3.01118200  | 1.50243300  |
| H  | 1.68957300  | 4.09340500  | 0.21092800  |
| H  | 0.71738200  | 3.85588000  | 1.68210700  |
| Cl | -5.98853100 | -0.57021600 | -0.20511500 |
| C  | 3.20219000  | -0.48494200 | -0.85770000 |
| C  | 2.38520800  | -0.89085800 | 0.18337600  |
| C  | 4.56368600  | -0.66517200 | -0.85970400 |
| C  | 2.92794600  | -1.49309300 | 1.29372100  |
| C  | 5.11095200  | -1.27721800 | 0.27121300  |
| H  | 5.18126200  | -0.33971000 | -1.69190000 |
| C  | 4.31356800  | -1.67784000 | 1.33338700  |
| H  | 2.29715400  | -1.82161300 | 2.11786700  |
| H  | 6.18594500  | -1.43289400 | 0.31867800  |
| H  | 4.76987400  | -2.14346700 | 2.20288300  |

|                                                   |              |                  |
|---------------------------------------------------|--------------|------------------|
| DFT M11/Def2TZVP, solvent acetonitrile, SMD model |              |                  |
| Total electronic energy=                          | -1401.219223 | $E_0$            |
| Sum of electronic and zero-point Energies=        | -1400.868005 | $E_0 + E_{ZPE}$  |
| Sum of electronic and thermal Energies=           | -1400.848491 | $E_0 + E_{tot}$  |
| Sum of electronic and thermal Enthalpies=         | -1400.847547 | $E_0 + H_{corr}$ |
| Sum of electronic and thermal Free Energies=      | -1400.909448 | $E_0 + G_{corr}$ |
| Zero-point correction ( <i>unscaled</i> ) =       | 0.351218     |                  |
| Number of imaginary vibrational frequencies =     | 0            |                  |

*cis-5ba-E*

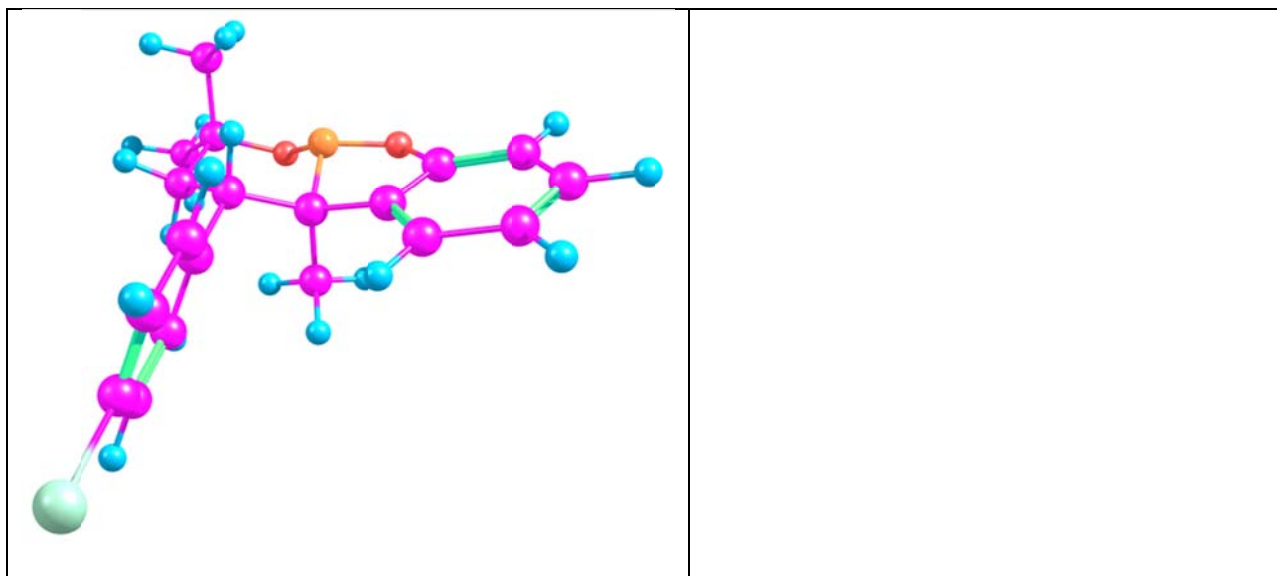

Charge 0; multiplicity 1

|   |             |             |             |
|---|-------------|-------------|-------------|
| O | 3.25912800  | 0.79630100  | 0.34238500  |
| O | 2.81871100  | -1.43439200 | 0.46872500  |
| C | 1.04227000  | 0.09701300  | 0.34340500  |
| N | 2.40651100  | -0.25634700 | -0.13936700 |
| C | 0.87684300  | -0.07928800 | 1.85615500  |
| H | 1.70201900  | 0.42103700  | 2.37390300  |
| H | -0.05965400 | 0.39242300  | 2.16899900  |
| H | 0.86813900  | -1.12928400 | 2.15669700  |
| C | 0.16680400  | -0.84242400 | -0.50711500 |
| H | 0.40343900  | -0.60934100 | -1.55134100 |
| C | 2.14334300  | -2.51232400 | -0.25790000 |
| C | 0.61526300  | -2.29015300 | -0.20836700 |
| H | 0.25466200  | -2.59362900 | 0.77962600  |
| H | 0.15346000  | -2.96513800 | -0.93777500 |
| C | -1.31990400 | -0.63010600 | -0.32105200 |
| C | -2.03981100 | 0.04528400  | -1.30346600 |
| C | -2.00292000 | -1.07926000 | 0.80726100  |
| C | -3.40029300 | 0.27741900  | -1.17235000 |
| H | -1.52307600 | 0.39995100  | -2.19362000 |
| C | -3.36335900 | -0.85615900 | 0.95692400  |
| H | -1.47417000 | -1.61345300 | 1.59272400  |
| C | -4.04716000 | -0.17828000 | -0.03735000 |
| H | -3.95260100 | 0.80416800  | -1.94549200 |
| H | -3.88927500 | -1.20896000 | 1.83963000  |
| C | 2.52041800  | -3.76468200 | 0.51097900  |
| H | 3.60074800  | -3.93551000 | 0.45524500  |
| H | 2.22642500  | -3.66815400 | 1.56158300  |
| H | 2.00548500  | -4.62897100 | 0.07921200  |
| C | 2.65999600  | -2.57651700 | -1.69026600 |
| H | 2.32160400  | -1.72458100 | -2.28532800 |
| H | 3.75510400  | -2.59532600 | -1.68892300 |

|    |             |             |             |
|----|-------------|-------------|-------------|
| H  | 2.29602700  | -3.49663100 | -2.15963800 |
| C  | 2.47250200  | 1.90404300  | 0.14733700  |
| C  | 2.93546800  | 3.19839600  | 0.06862100  |
| C  | 1.12189100  | 1.57649600  | 0.04985400  |
| C  | 1.97981500  | 4.19638100  | -0.11690000 |
| H  | 3.99487600  | 3.42550000  | 0.14512700  |
| C  | 0.18537700  | 2.57400100  | -0.11975100 |
| C  | 0.62816500  | 3.89416500  | -0.21546500 |
| H  | 2.30509900  | 5.23135900  | -0.18896100 |
| H  | -0.87562600 | 2.34110500  | -0.16923800 |
| H  | -0.09291400 | 4.69391000  | -0.36173100 |
| Cl | -5.75999800 | 0.10194200  | 0.14145700  |

|                                                   |              |                  |
|---------------------------------------------------|--------------|------------------|
| DFT M11/Def2TZVP, solvent acetonitrile, SMD model |              |                  |
| Total electronic energy=                          | -1401.218603 | $E_0$            |
| Sum of electronic and zero-point Energies=        | -1400.867477 | $E_0 + E_{ZPE}$  |
| Sum of electronic and thermal Energies=           | -1400.847957 | $E_0 + E_{tot}$  |
| Sum of electronic and thermal Enthalpies=         | -1400.847013 | $E_0 + H_{corr}$ |
| Sum of electronic and thermal Free Energies=      | -1400.908807 | $E_0 + G_{corr}$ |
| Zero-point correction ( <i>unscaled</i> ) =       | 0.351127     |                  |
| Number of imaginary vibrational frequencies =     | 0            |                  |

## References

1. R. S. Malykhin, I. S. Golovanov, Y. V. Nelyubina, S. L. Ioffe and A. Y. Sukhorukov, Construction of Saturated Oxazolo[3,2-b][1,2]oxazines via Tandem [3+2]-Cycloaddition/[1,3]-Rearrangement of Cyclic Nitronates and Ketenes, *J. Org. Chem.*, 2021, **86**, 16337-16348.
2. R. S. Malykhin, Y. D. Boyko, Y. V. Nelyubina, S. L. Ioffe and A. Y. Sukhorukov, Interrupted Nef Reaction of Cyclic Nitronates: Diastereoselective Access to Densely Substituted  $\alpha$ -Chloronitroso Compounds, *J. Org. Chem.*, 2022, **87**, 16617-16631.
3. A. A. Tabolin, A. V. Lesiv, Y. A. Khomutova, Y. V. Nelyubina and S. L. Ioffe, Rearrangement of 3-alkylidene-2-siloxy-tetrahydro-1,2-oxazines (ASENA). A new approach toward the synthesis of 3- $\alpha$ -hydroxyalkyl-5,6-dihydro-4H-1,2-oxazines, *Tetrahedron*, 2009, **65**, 4578-4592.
4. A. Y. Sukhorukov, M. S. Klenov, P. E. Ivashkin, A. V. Lesiv, Y. A. Khomutova and S. L. Ioffe, A Convenient Procedure for the Synthesis of 3-Substituted 5,6-Dihydro-4H-1,2-oxazines from Nitroethane, *Synthesis*, 2007, **2007**, 97-107.
5. P. Y. Ushakov, S. L. Ioffe and A. Y. Sukhorukov, Regio- and diastereoselective access to densely functionalized ketones via the Boekelheide rearrangement of isoxazoline N-oxides, *Org. Biomol. Chem.*, 2022, **20**, 5624-5637.
6. A. A. Tabolin, Y. A. Khomutova, Y. V. Nelyubina, S. L. Ioffe and V. A. Tartakovskiy, New Rearrangement of Conjugated Cyclic Ene Nitroso O-Trimethylsilyl Acetals: Convenient Synthesis of Dihydro-2H-pyran-3-one and Dihydrofuran-3-one Oximes, *Synthesis*, 2011, **2011**, 2415-2422.
7. L. Celano, C. Carabio, R. Frache, N. Cataldo, H. Cerecetto, M. González and L. Thomson, Arylnitroalkenes as scavengers of macrophage-generated oxidants, *Eur. J. Med. Chem.*, 2014, **74**, 31-40.
8. P. Y. Ushakov, A. Y. Sukhorukov, S. L. Ioffe and A. A. Tabolin, Sequential Formal [4+1]-Cycloaddition, C-H Functionalization and Suzuki-Miyaura Cross-Coupling for the Synthesis of Trisubstituted Isoxazolines, *Eur. J. Org. Chem.*, 2021, **2021**, 2680-2693.
9. E. A. Khotyantseva, A. A. Tabolin, R. A. Novikov, Y. V. Nelyubina and S. L. Ioffe, Synthesis of unsaturated silyl nitronates via the silylation of conjugated nitroalkenes, *Tetrahedron Lett.*, 2018, **59**, 3128-3131.
10. S. E. Winterton, E. Capota, X. Wang, H. Chen, P. L. Mallipeddi, N. S. Williams, B. A. Posner, D. Nijhawan and J. M. Ready, Discovery of Cytochrome P450 4F11 Activated Inhibitors of Stearoyl Coenzyme A Desaturase, *J. Med. Chem.*, 2018, **61**, 5199-5221.
11. M. Weßling and H. J. Schäfer, Cathodic hydrodimerization of nitroolefins, *Beilstein J. Org. Chem.*, 2015, **11**, 1163-1174.
12. D. N. Robertson, Phenylnitromethane. I. An Improved Synthesis of  $\alpha$ -Nitrostilbenes, *J. Org. Chem.*, 1960, **25**, 47-49.
13. a) A. A. Fadeeva, S. L. Ioffe and A. A. Tabolin, Chlorination of Conjugated Nitroalkenes with PhICl<sub>2</sub> and SO<sub>2</sub>Cl<sub>2</sub> for the Synthesis of  $\alpha$ -Chloronitroalkenes, *Synthesis*, 2020, **52**, 2679-2688; b) S. Yoshida, K. Shimomori, T. Nonaka and T. Hosoya, Facile synthesis of diverse multisubstituted ortho-silylaryl triflates via C-H borylation, *Chem. Lett.*, 2015, **44**, 1324-1326.
14. A. S. Shved, A. A. Tabolin, Y. A. Khomutova and S. L. Ioffe, Reactions of silyl nitronates with dimethylformamide dimethyl acetal as a new general procedure for the synthesis of 2-nitroenamines, *Tetrahedron Lett.*, 2014, **55**, 6220-6223.
15. M. S. Klenov, A. V. Lesiv, Y. A. Khomutova, I. D. Nesterov and S. L. Ioffe, A Convenient Procedure for the Synthesis of Substituted 3- $\alpha$ -Haloalkyl-5,6-dihydro-4H-1,2-oxazines, *Synthesis*, 2004, **2004**, 1159-1170.
16. a) A. A. Tishkov, A. V. Lesiv, Y. A. Khomutova, Y. A. Strelenko, I. D. Nesterov, M. Y. Antipin, S. L. Ioffe and S. E. Denmark, 2-Silyloxy-1,2-oxazines, a New Type of Acetals of Conjugated Nitroso Alkenes, *J. Org. Chem.*, 2003, **68**, 9477-9480; b) S. E. Denmark, B. S. Kesler and Y. C. Moon, Inter- and intramolecular [4 + 2] cycloadditions of nitroalkenes with olefins. 2-Nitrostyrenes, *J. Org. Chem.*, 1992, **57**, 4912-4924.

17. T. Taniguchi, T. Fujii and H. Ishibashi, Iron-Mediated Radical Halo-Nitration of Alkenes, *J. Org. Chem.*, 2010, **75**, 8126-8132.
18. M. Clagett, A. Gooch, P. Graham, N. Holy, B. Mains and J. Strunk, Organocopper intermediates. Synthesis of 2-isoxazoline N-oxides and cyclopropanes, *J. Org. Chem.*, 1976, **41**, 4033-4035.
19. P. A. Zhmurov, Y. A. Khoroshutina, R. A. Novikov, I. S. Golovanov, A. Y. Sukhorukov and S. L. Ioffe, Divergent Reactivity of In Situ Generated Metal Azides: Reaction with N,N-Bis(oxy)enamines as a Case Study, *Chem. Eur. J.*, 2017, **23**, 4570-4578.
20. W. Xu, J. Zhao, X. Li and Y. Liu, Selective [5 + 1] and [5 + 2] Cycloaddition of Ynamides or Propargyl Esters with Benzo[d]isoxazoles via Gold Catalysis, *J. Org. Chem.*, 2018, **83**, 15470-15485.
21. G. Sheldrick, Crystal structure refinement with SHELXL, *Acta Crystallographica Section C*, 2015, **71**, 3-8.
22. O. V. Dolomanov, L. J. Bourhis, R. J. Gildea, J. A. Howard and H. Puschmann, OLEX2: a complete structure solution, refinement and analysis program, *J. Appl. Crystallogr.*, 2009, **42**, 339-341.
23. G. M. Sheldrick, A short history of SHELX, *Acta Crystallogr. Sect. A: Found. Crystallogr.*, 2008, **64**, 112-122.
24. M. J. Frisch, G. W. Trucks, H. B. Schlegel, G. E. Scuseria, M. A. Robb, J. R. Cheeseman, G. Scalmani, V. Barone, G. A. Petersson, H. Nakatsuji, X. Li, M. Caricato, A. V. Marenich, J. Bloino, B. G. Janesko, R. Gomperts, B. Mennucci, H. P. Hratchian, J. V. Ortiz, A. F. Izmaylov, J. L. Sonnenberg, D. Williams-Young, F. Ding, F. Lipparini, F. Egidi, J. Goings, B. Peng, A. Petrone, T. Henderson, D. Ranasinghe, V. G. Zakrzewski, J. Gao, N. Rega, G. Zheng, W. Liang, M. Hada, M. Ehara, K. Toyota, R. Fukuda, J. Hasegawa, M. Ishida, T. Nakajima, Y. Honda, O. Kitao, H. Nakai, T. Vreven, K. Throssell, J. A. Montgomery, Jr.; , J. E. Peralta, F. Ogliaro, M. J. Bearpark, J. J. Heyd, E. N. Brothers, K. N. Kudin, V. N. Staroverov, T. A. Keith, R. Kobayashi, J. Normand, K. Raghavachari, A. P. Rendell, J. C. Burant, S. S. Iyengar, J. Tomasi, M. Cossi, J. M. Millam, M. Klene, C. Adamo, R. Cammi, J. W. Ochterski, R. L. Martin, K. Morokuma, O. Farkas, J. B. Foresman and D. J. Fox, *Gaussian, Inc. Wallingford, CT*, 2016.
25. R. L. Martin, P. J. Hay and L. R. Pratt, Hydrolysis of Ferric Ion in Water and Conformational Equilibrium, *J. Phys. Chem. A*, 1998, **102**, 3565-3573.

# Copies of NMR spectra

*N,N*-Dimethyl-2-nitrobut-1-en-1-amine

$^1\text{H}$  NMR (300 MHz,  $\text{CDCl}_3$ )

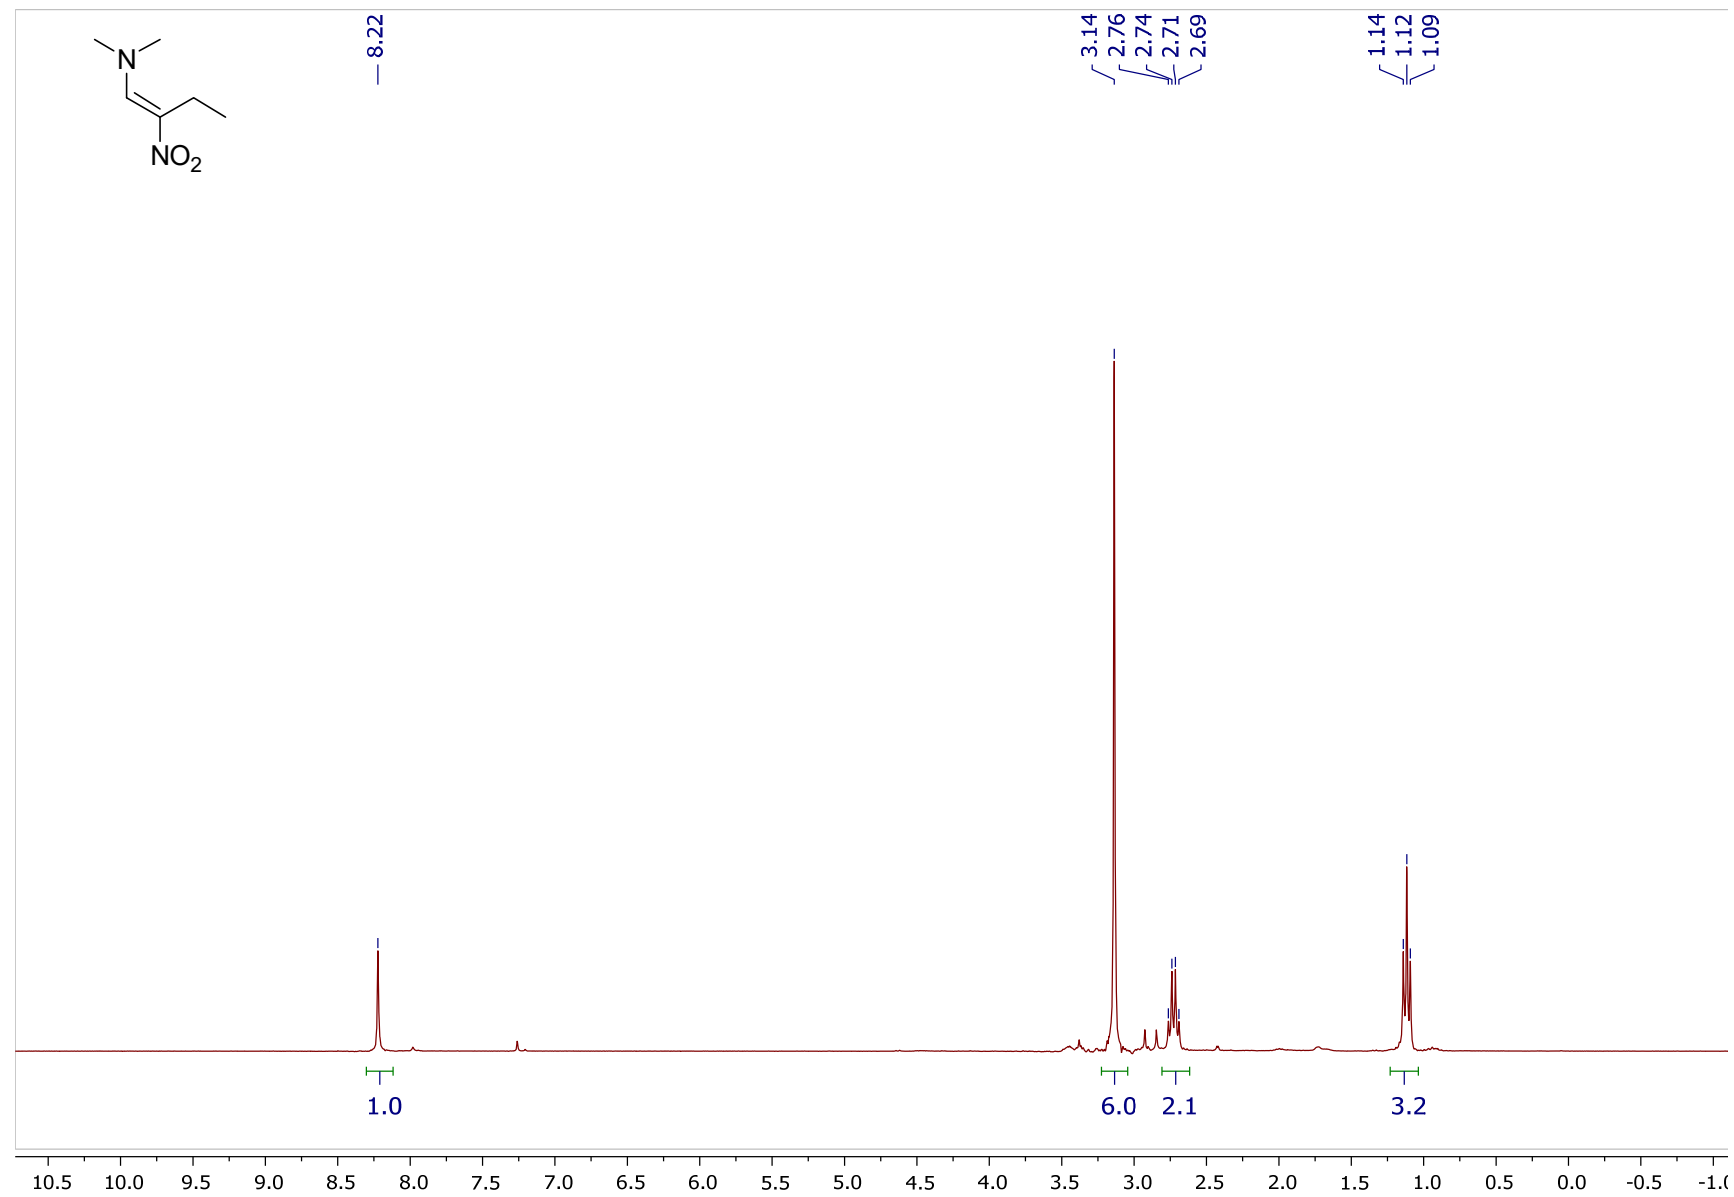

**(E)-2-Nitrobut-1-en-1-yl benzoate 3g**

$^1\text{H}$  NMR (300 MHz,  $\text{CDCl}_3$ )

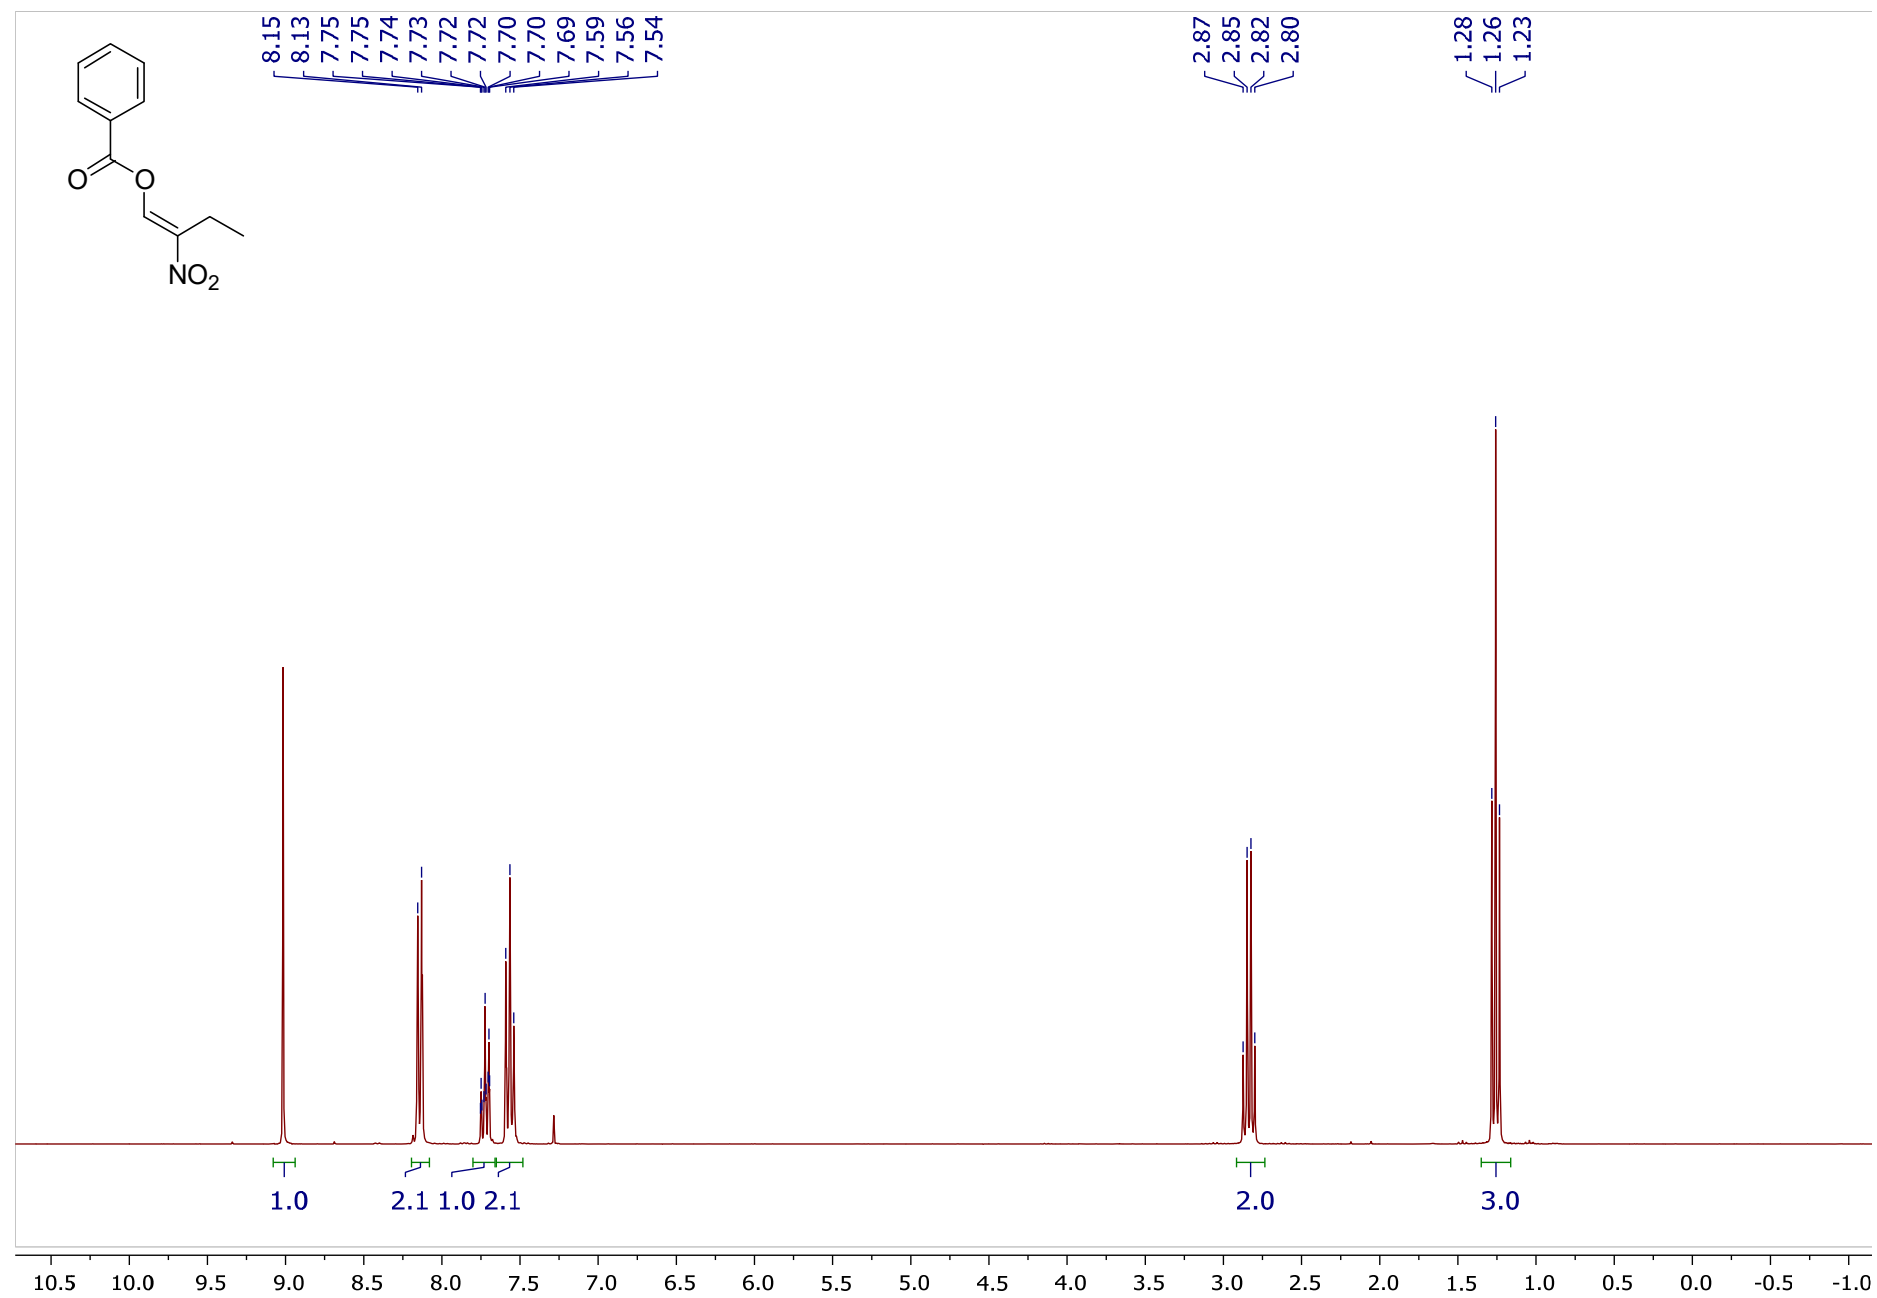

$^{13}\text{C}$  NMR (75 MHz,  $\text{CDCl}_3$ )

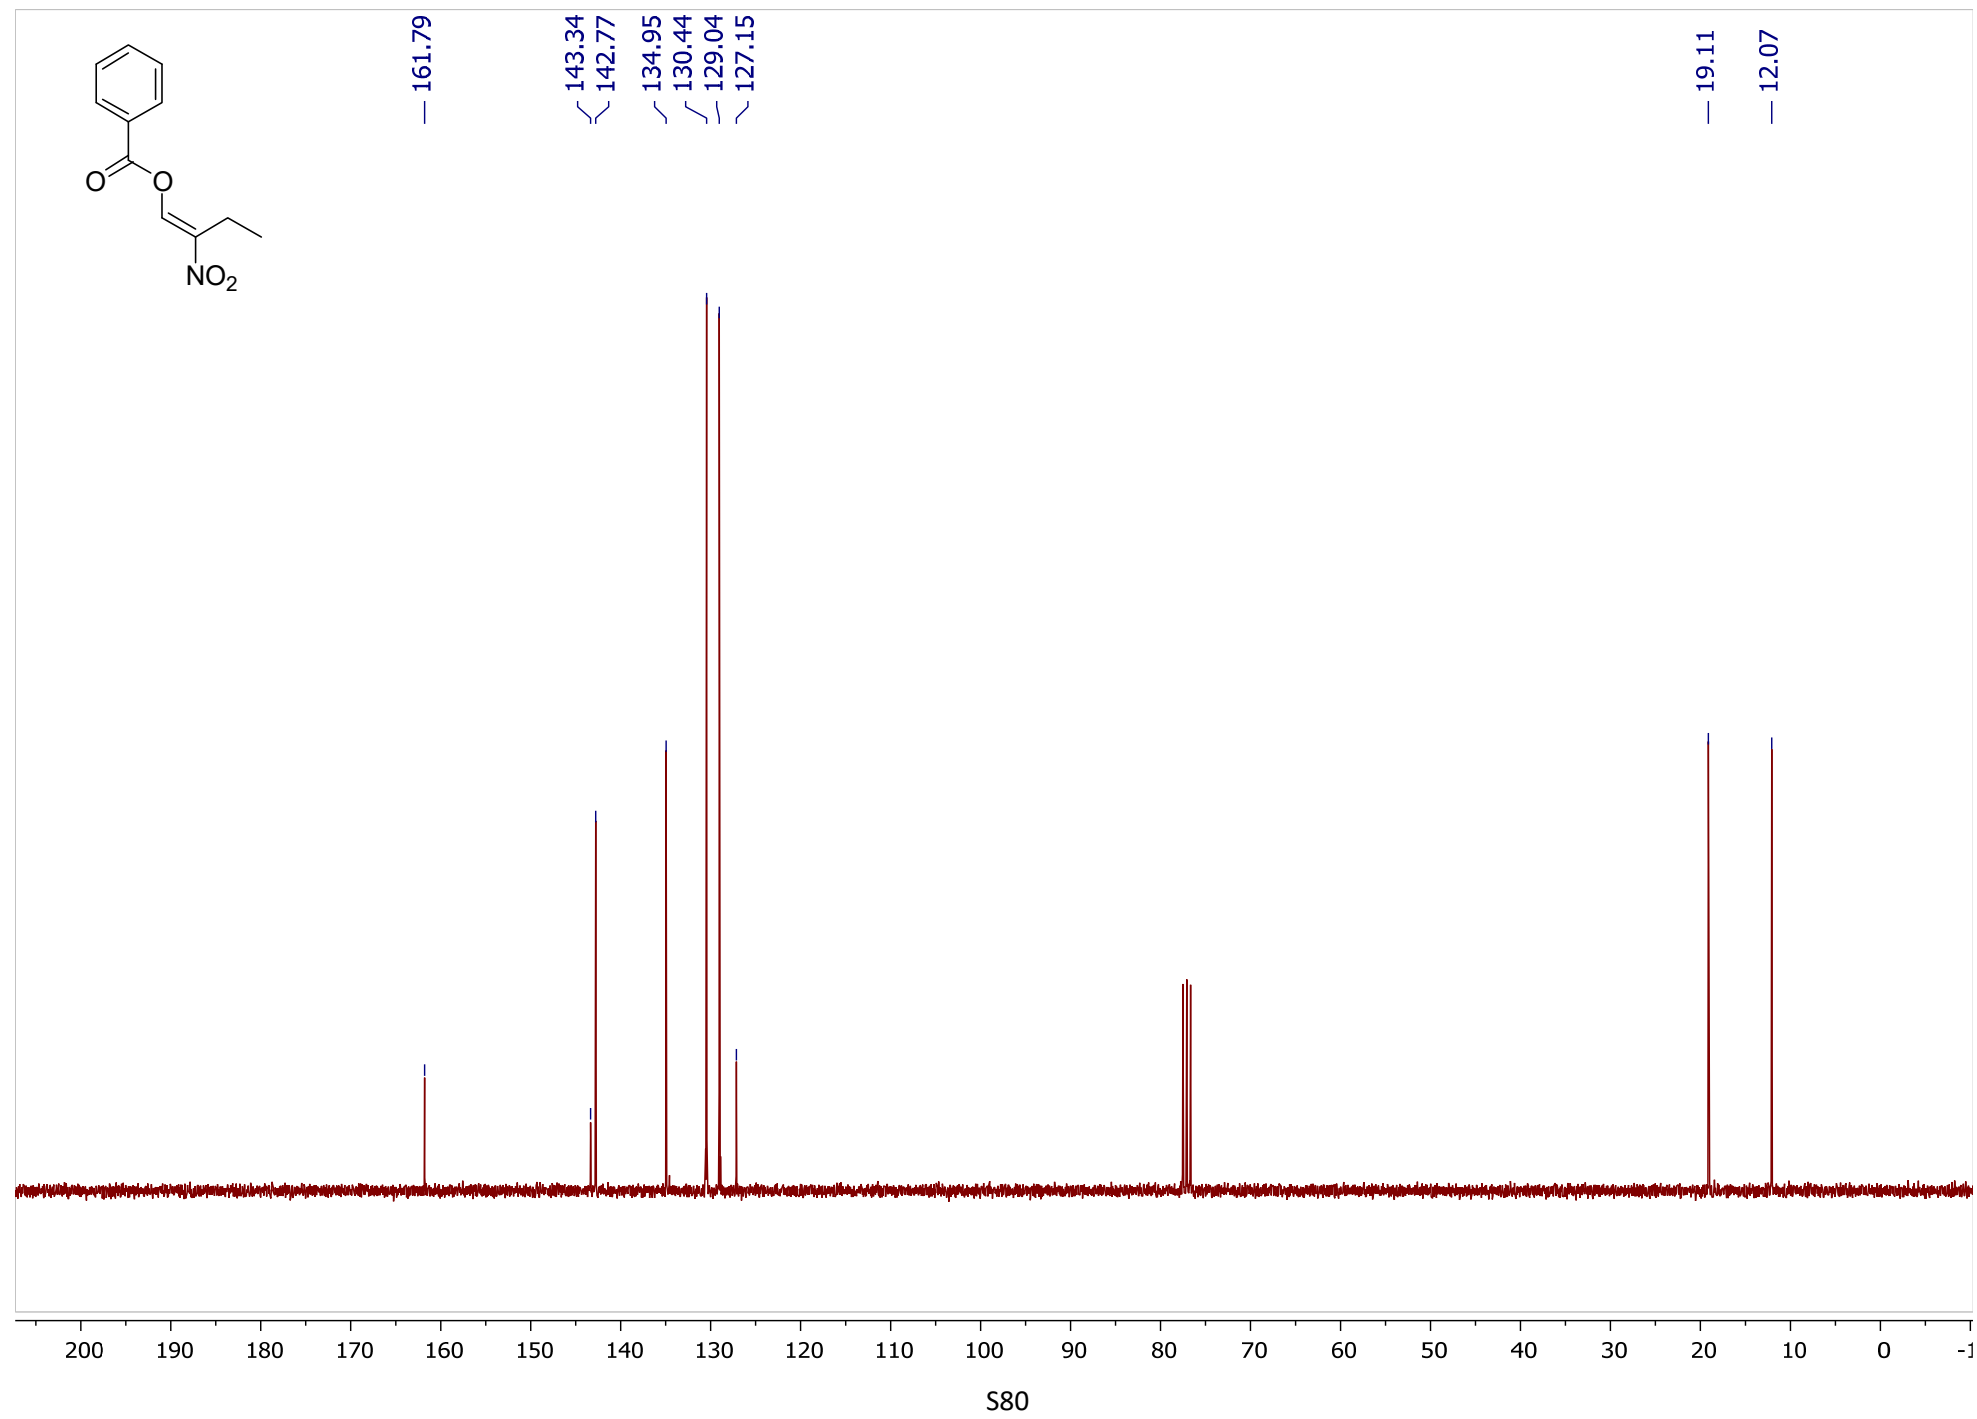



$^{13}\text{C}$  DEPT 135 (75 MHz,  $\text{CDCl}_3$ )

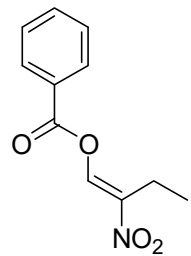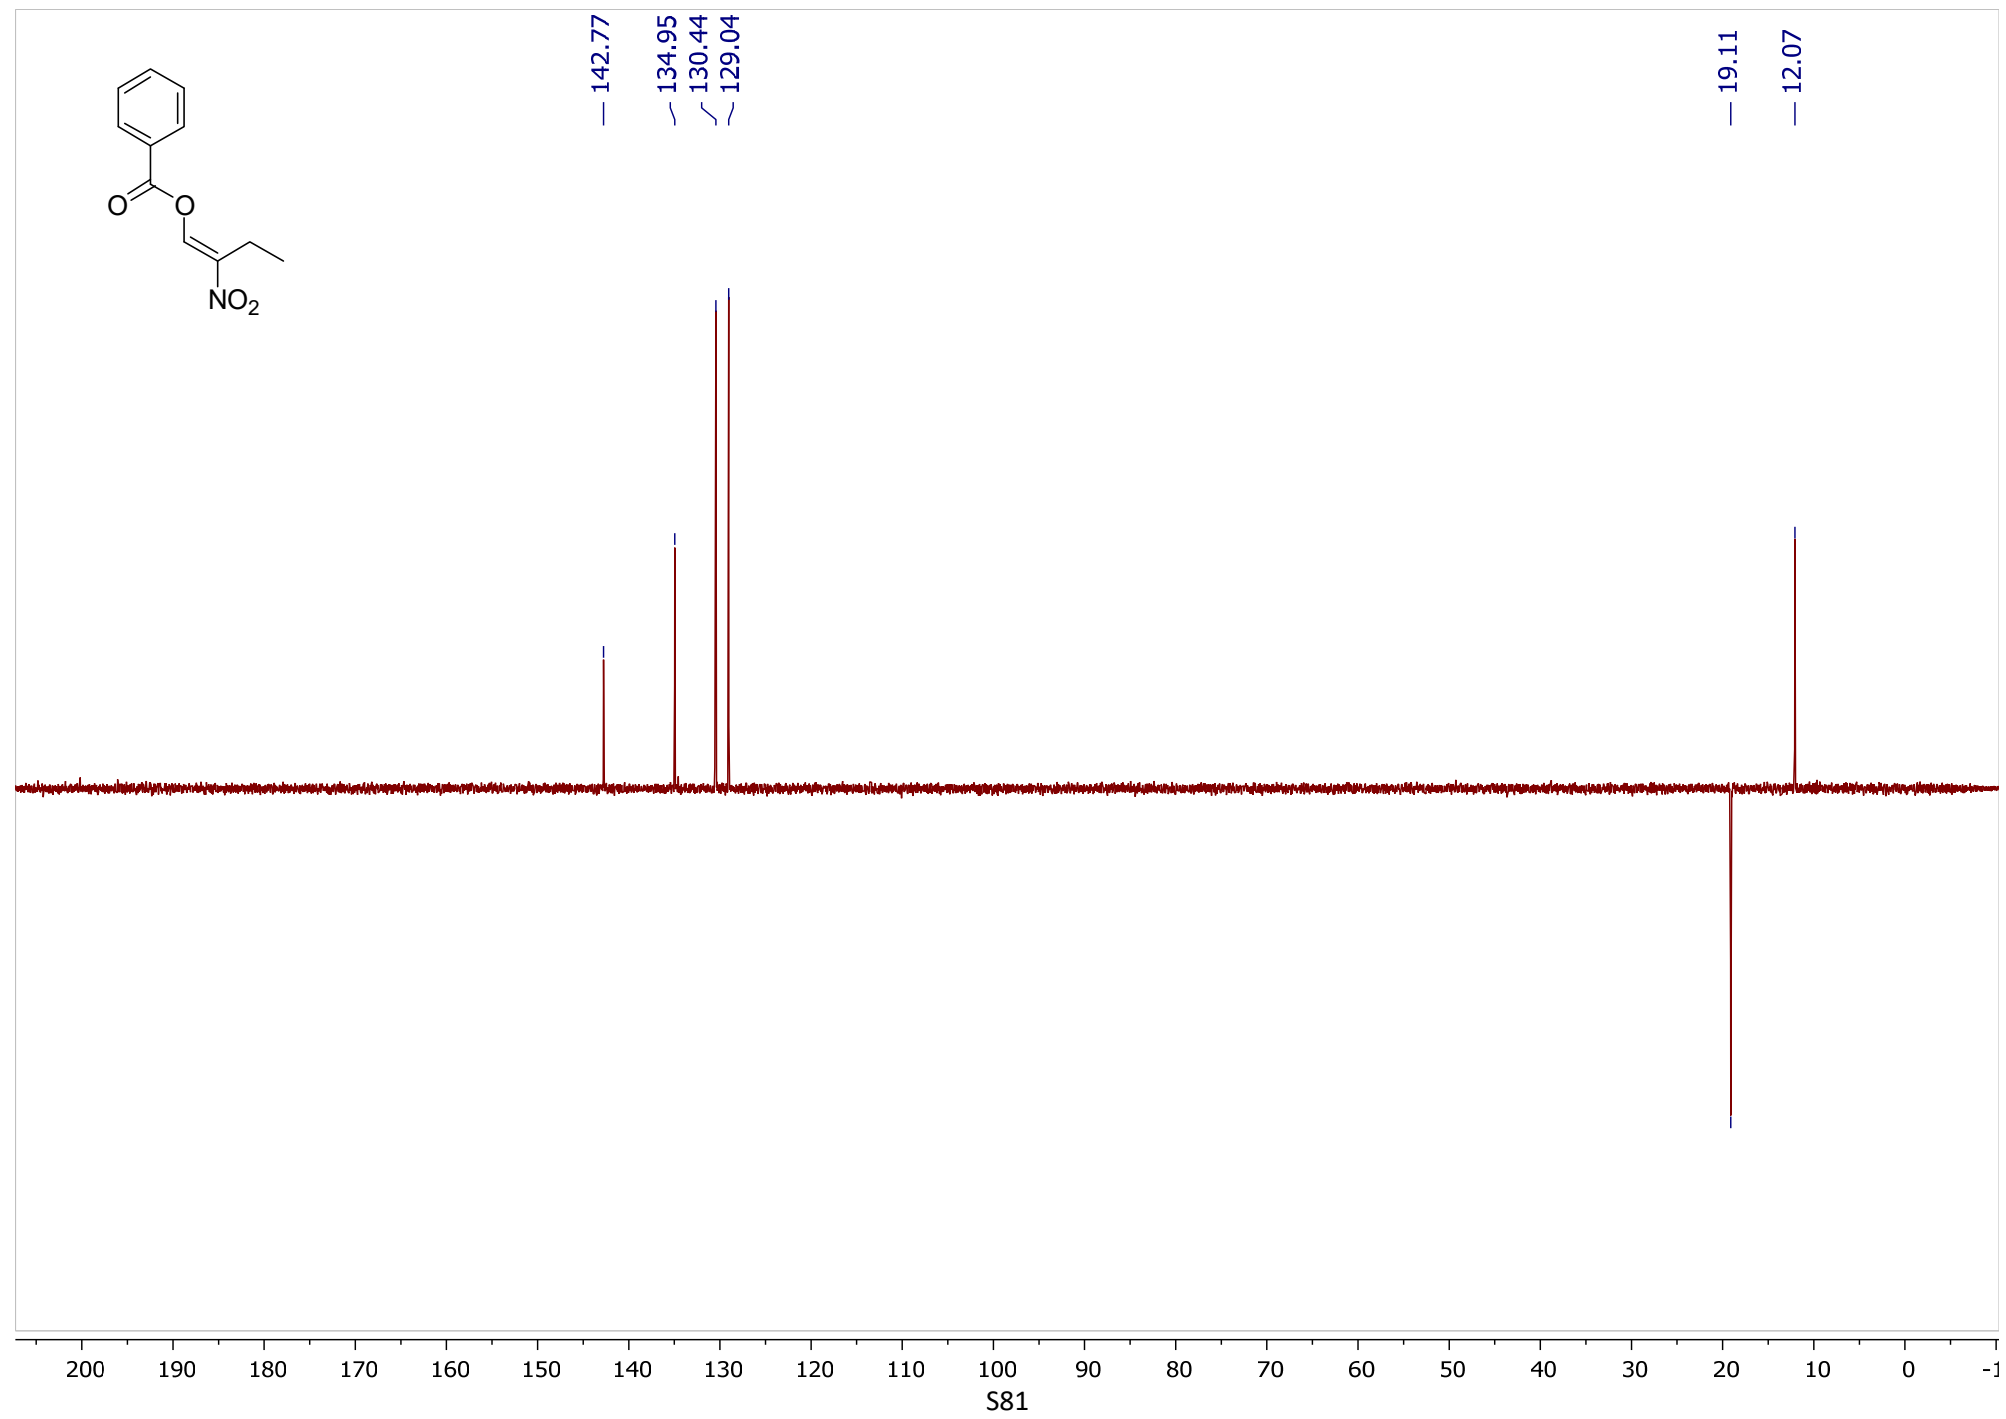

4-(2-Bromophenyl)-3,6,6-trimethyl-5,6-dihydro-4H-1,2-oxazine 2-oxide 1c

$^1\text{H}$  NMR (300 MHz,  $\text{CDCl}_3$ )

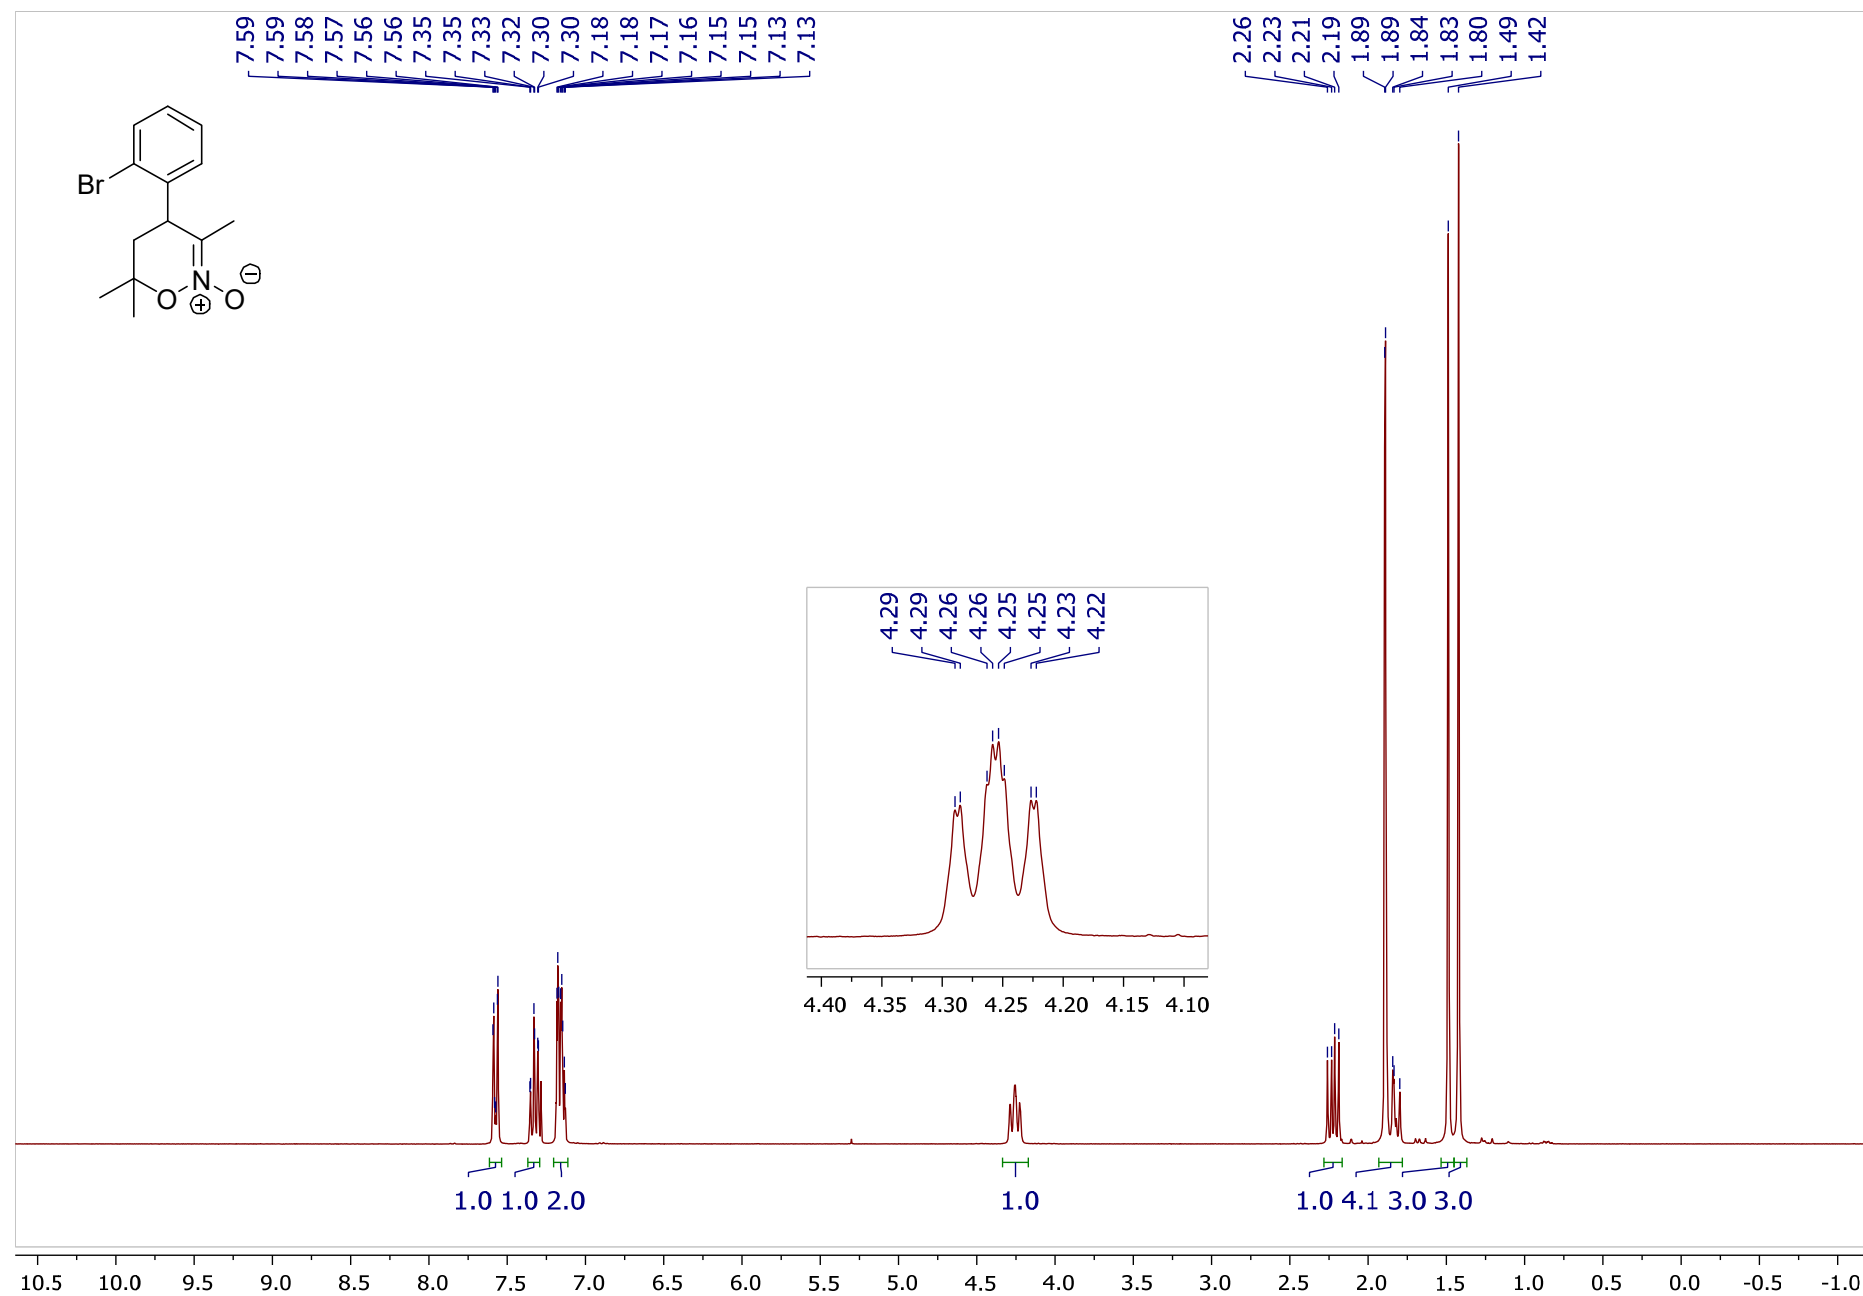

$^{13}\text{C}$  NMR (75 MHz,  $\text{CDCl}_3$ )

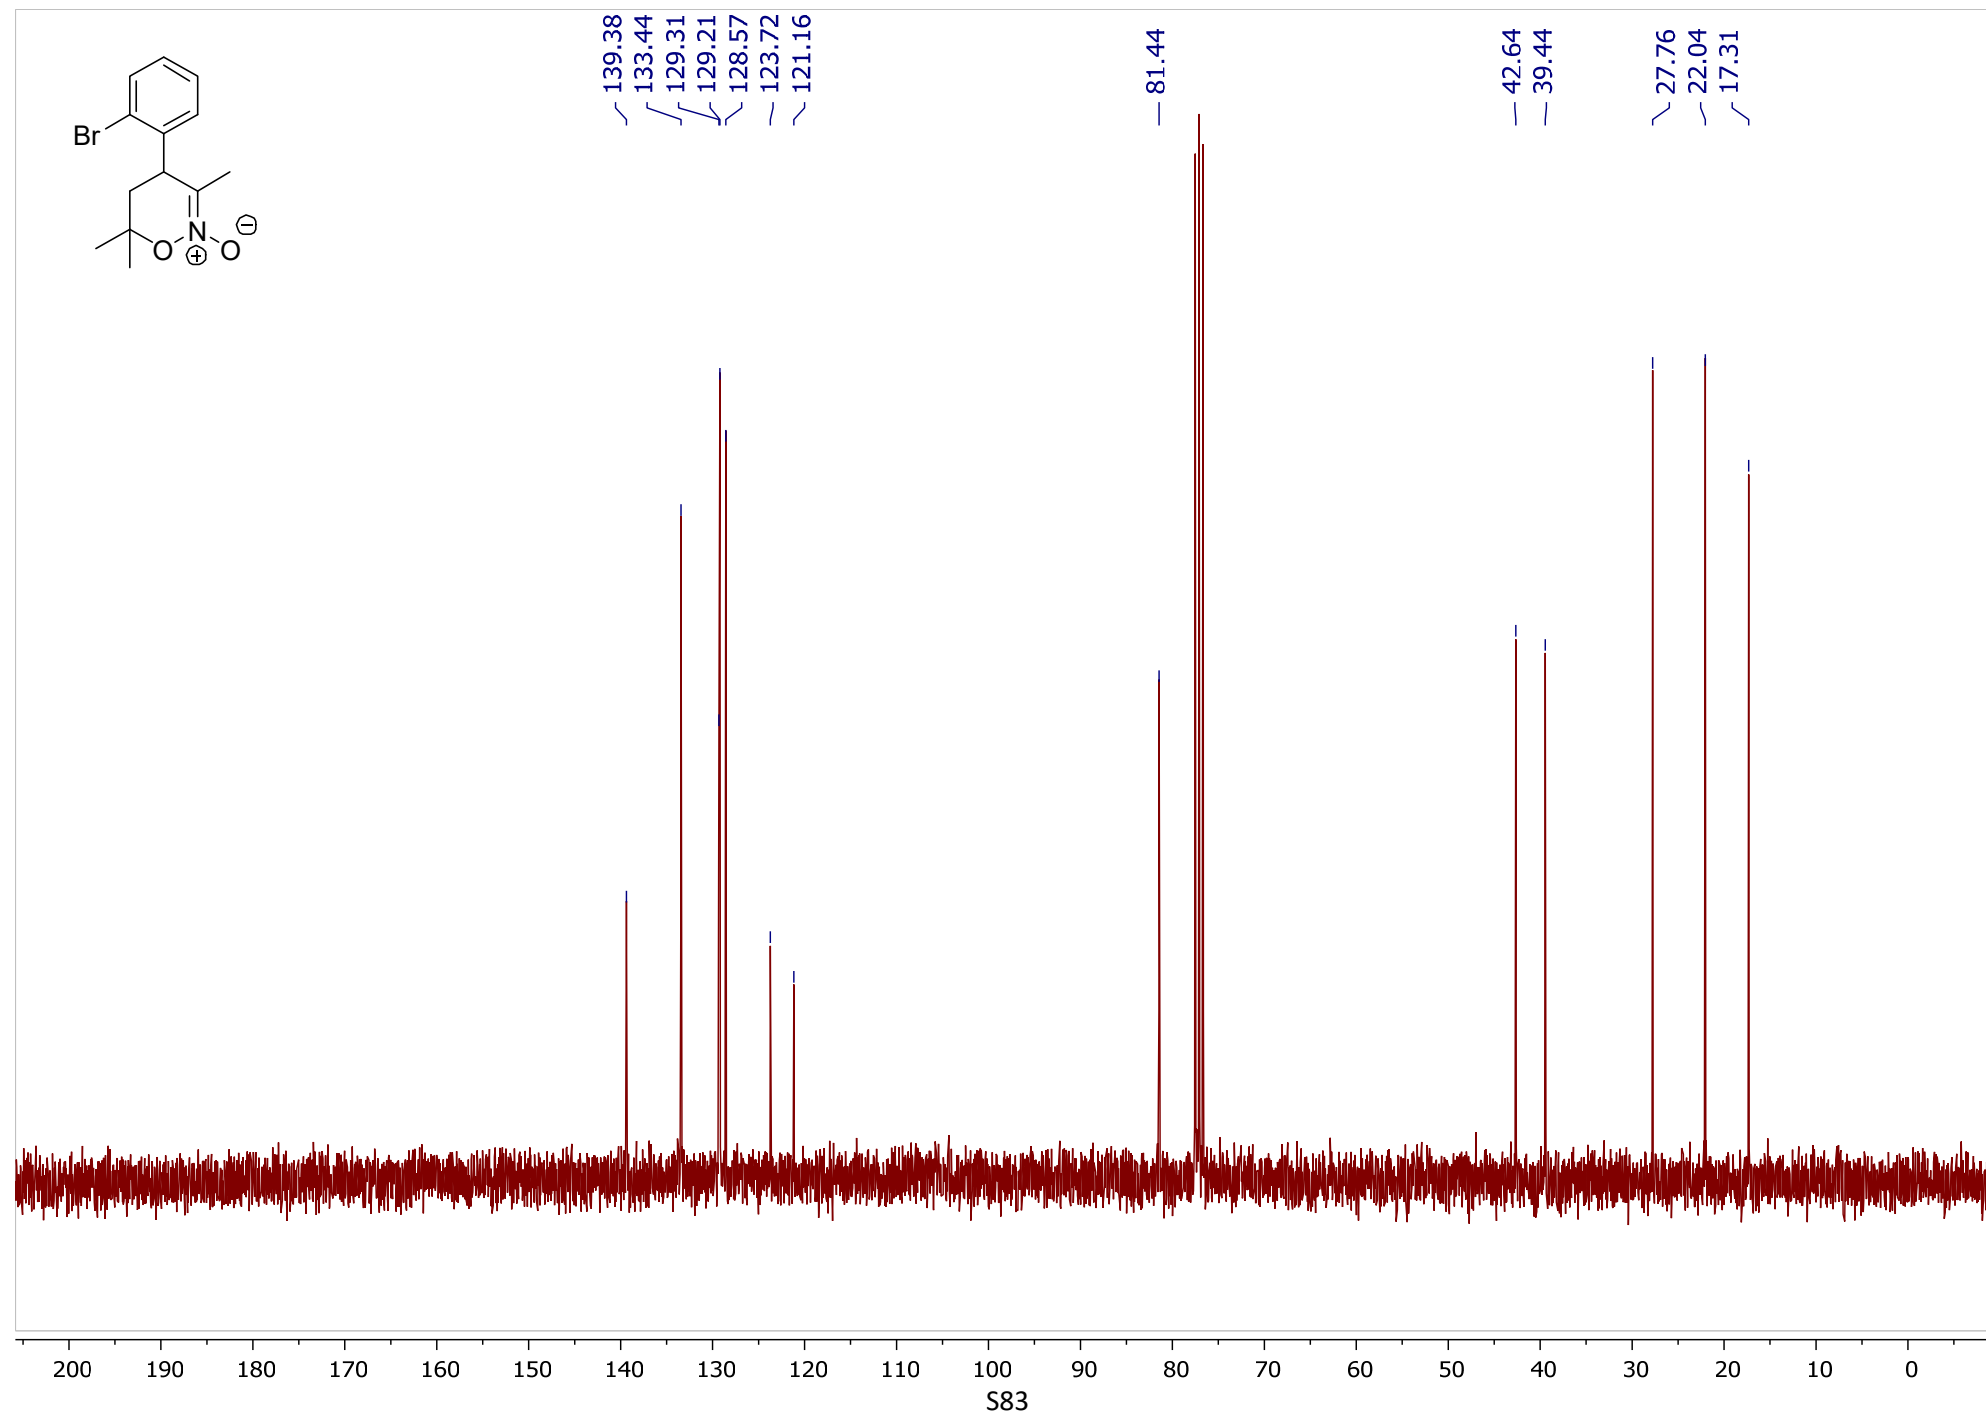

$^{13}\text{C}$  DEPT 135 (75 MHz,  $\text{CDCl}_3$ )

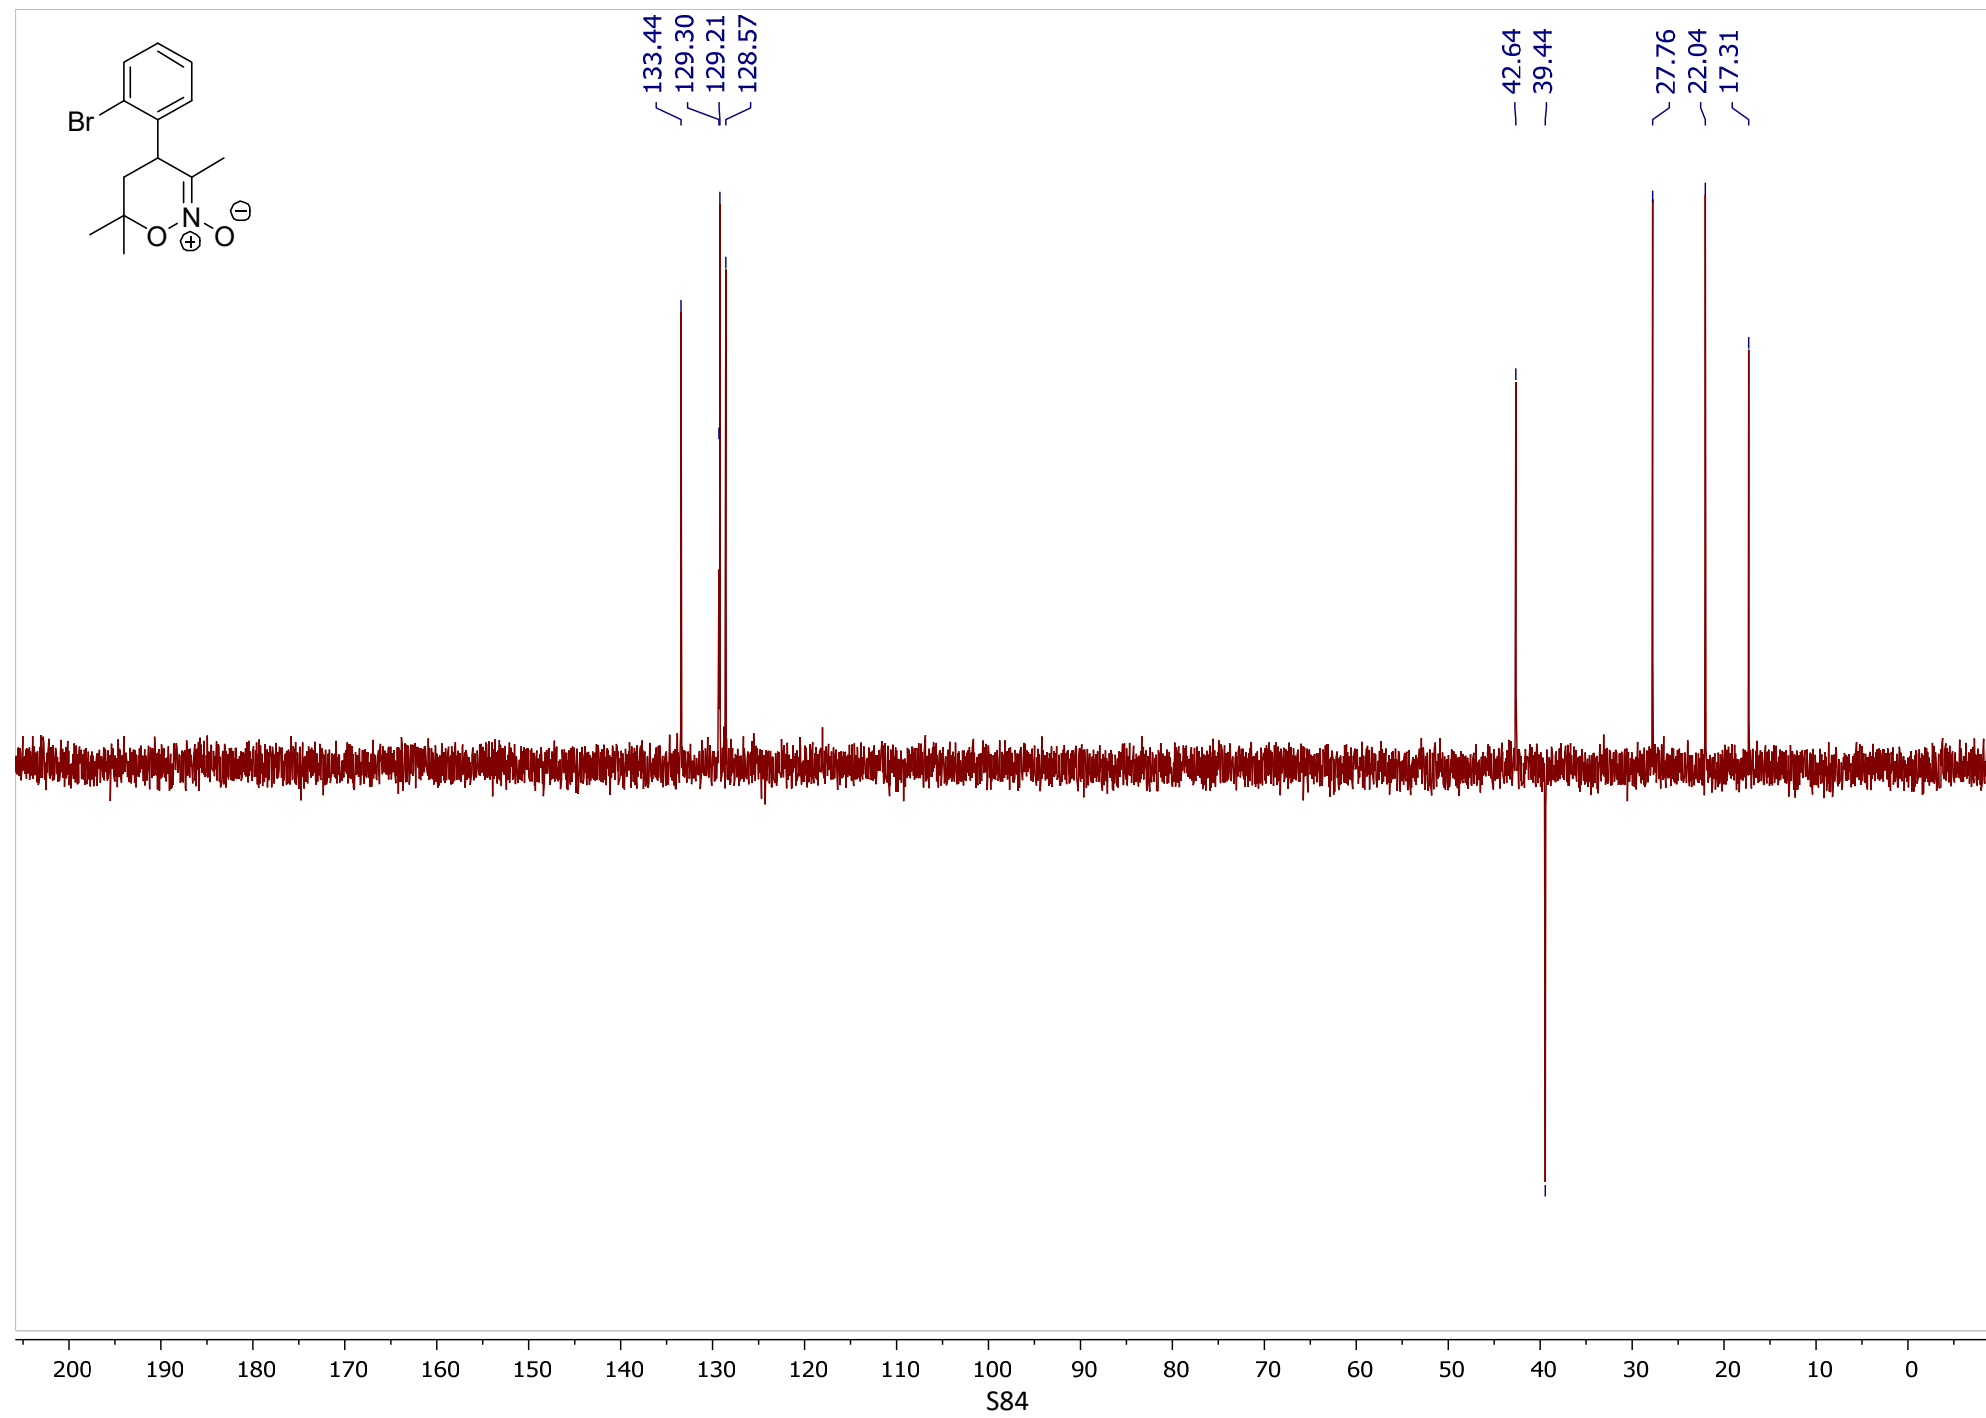

**3,4,6,6-Tetramethyl-5,6-dihydro-4H-1,2-oxazine 2-oxide 1d**

$^1\text{H}$  NMR (300 MHz,  $\text{CDCl}_3$ )

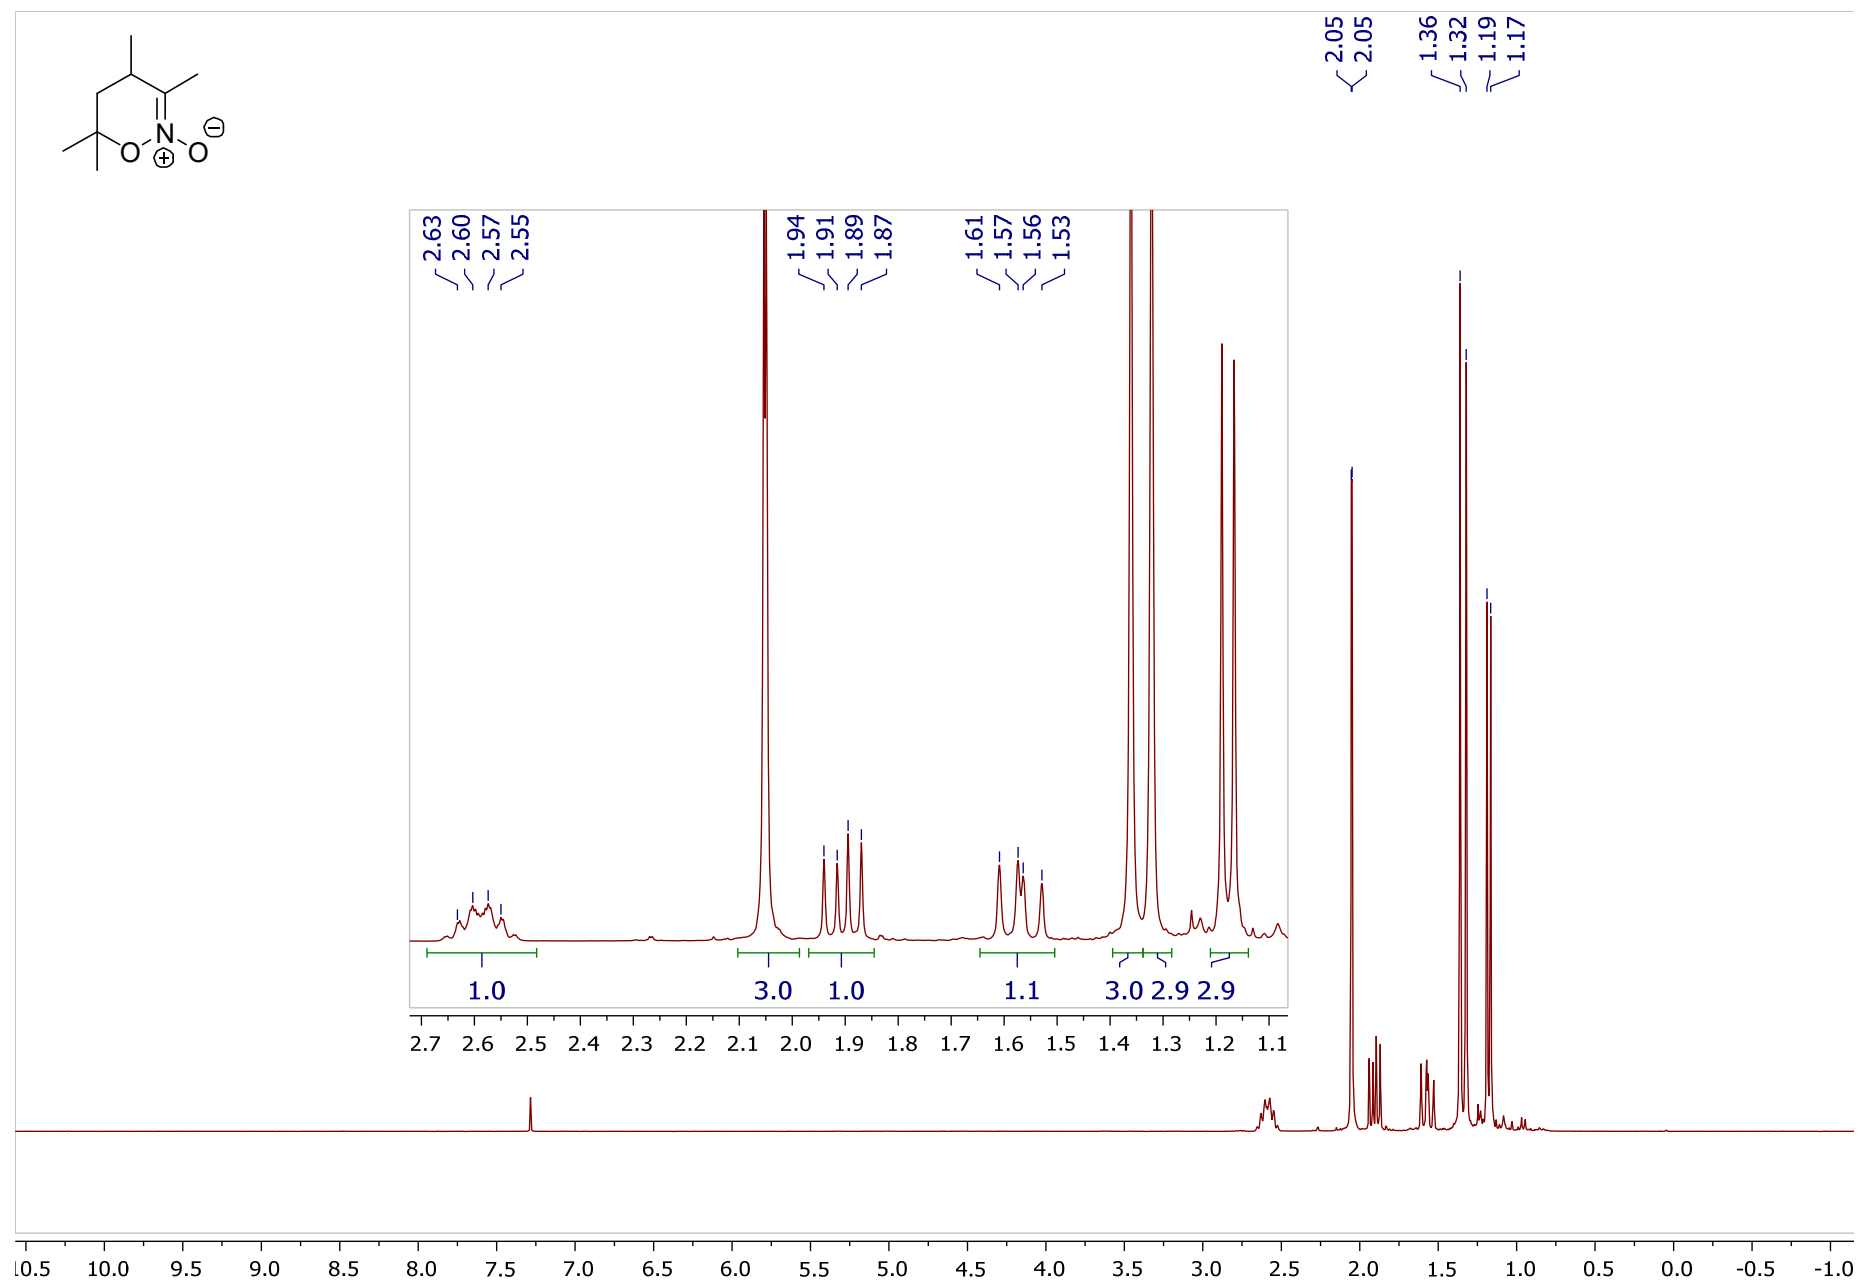

$^{13}\text{C}$  NMR (75 MHz,  $\text{CDCl}_3$ )

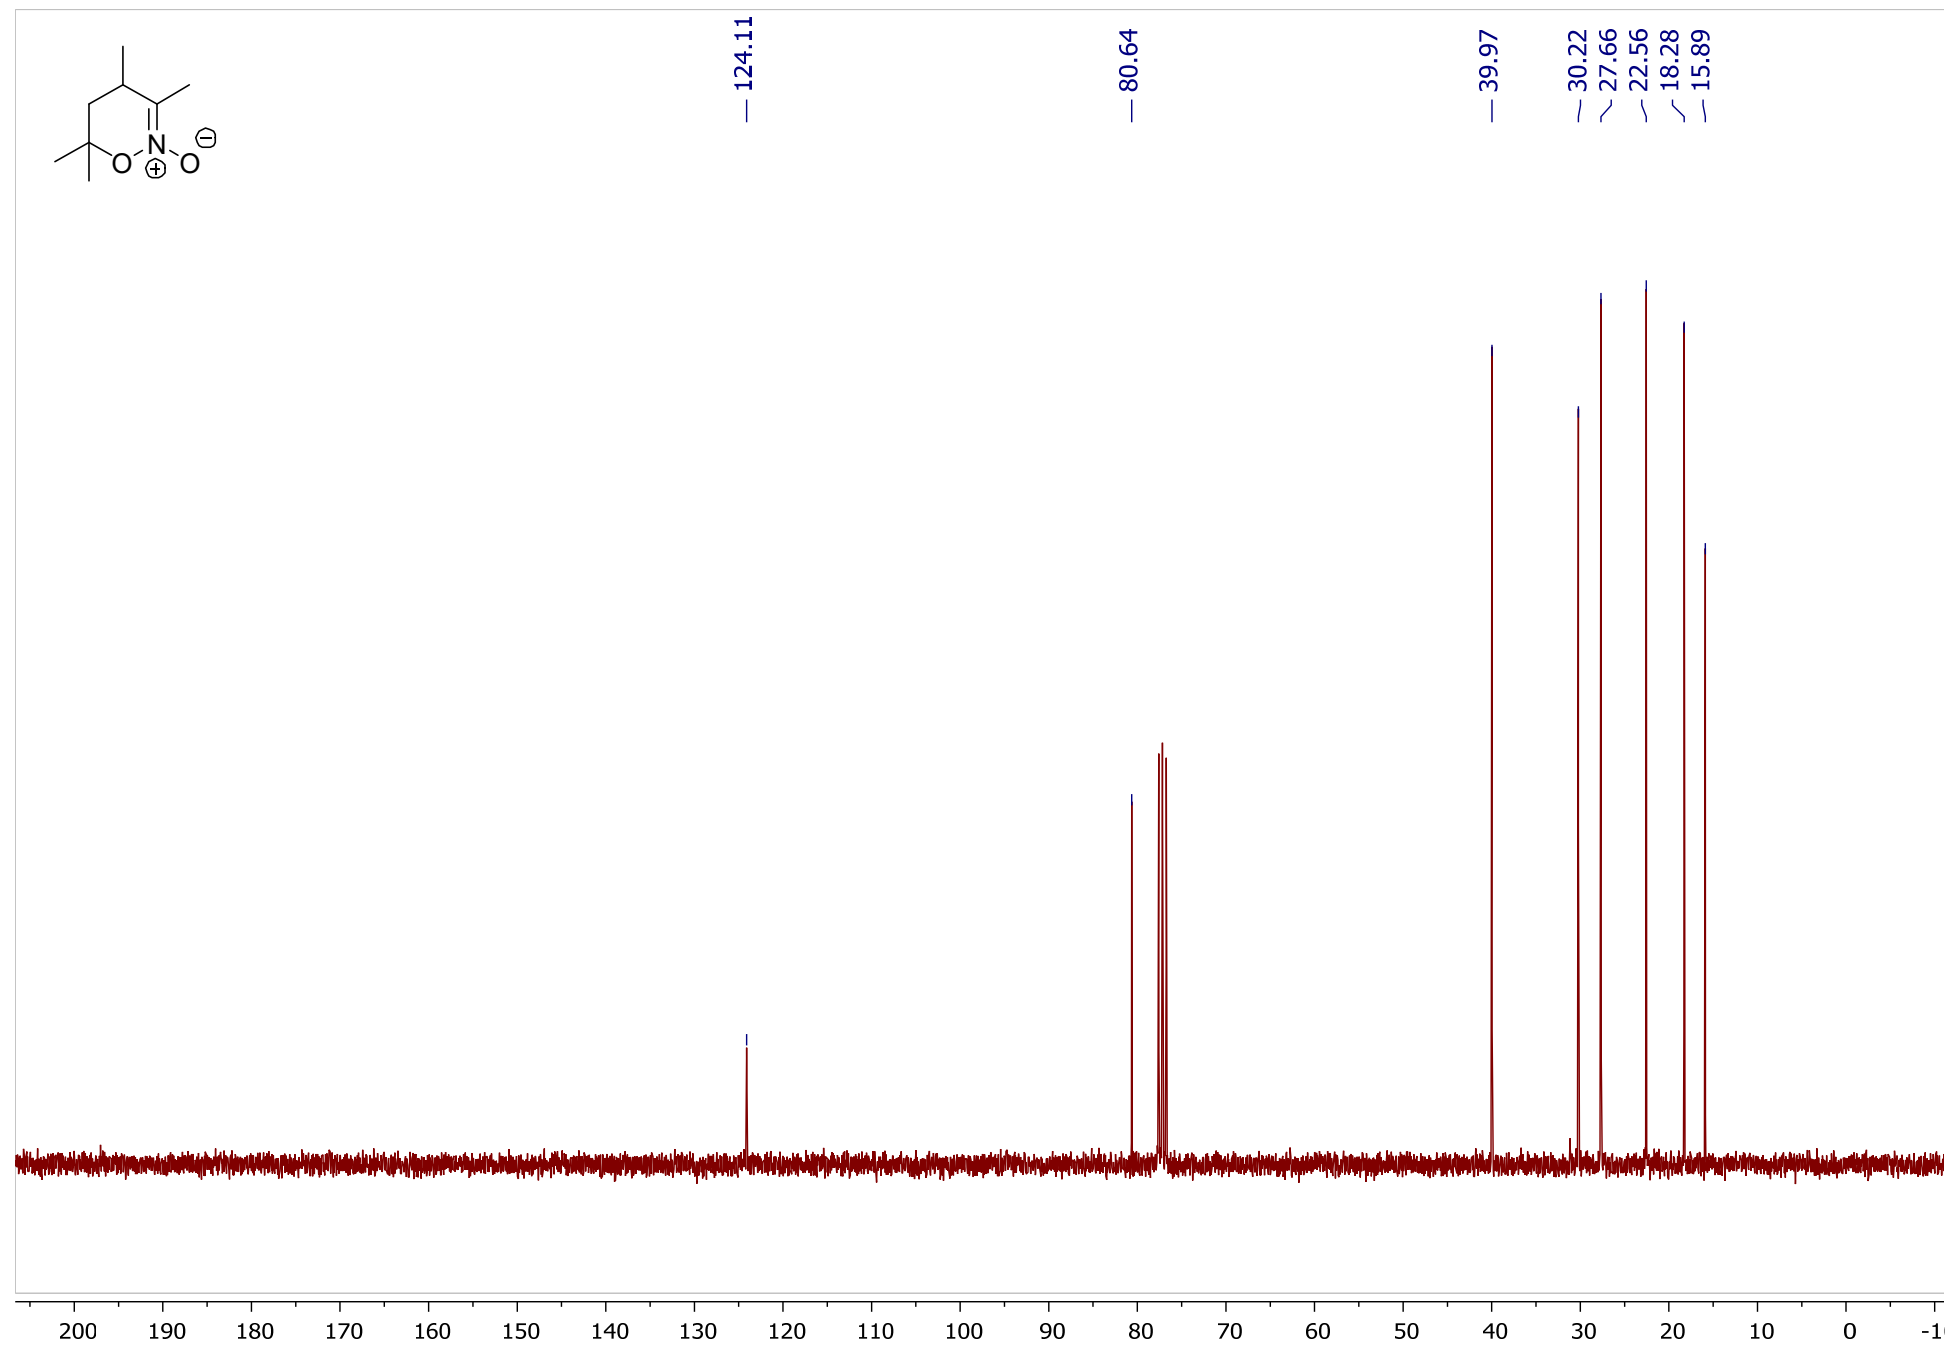

$^{13}\text{C}$  DEPT 135 (75 MHz,  $\text{CDCl}_3$ )

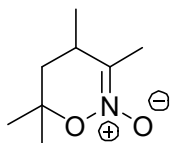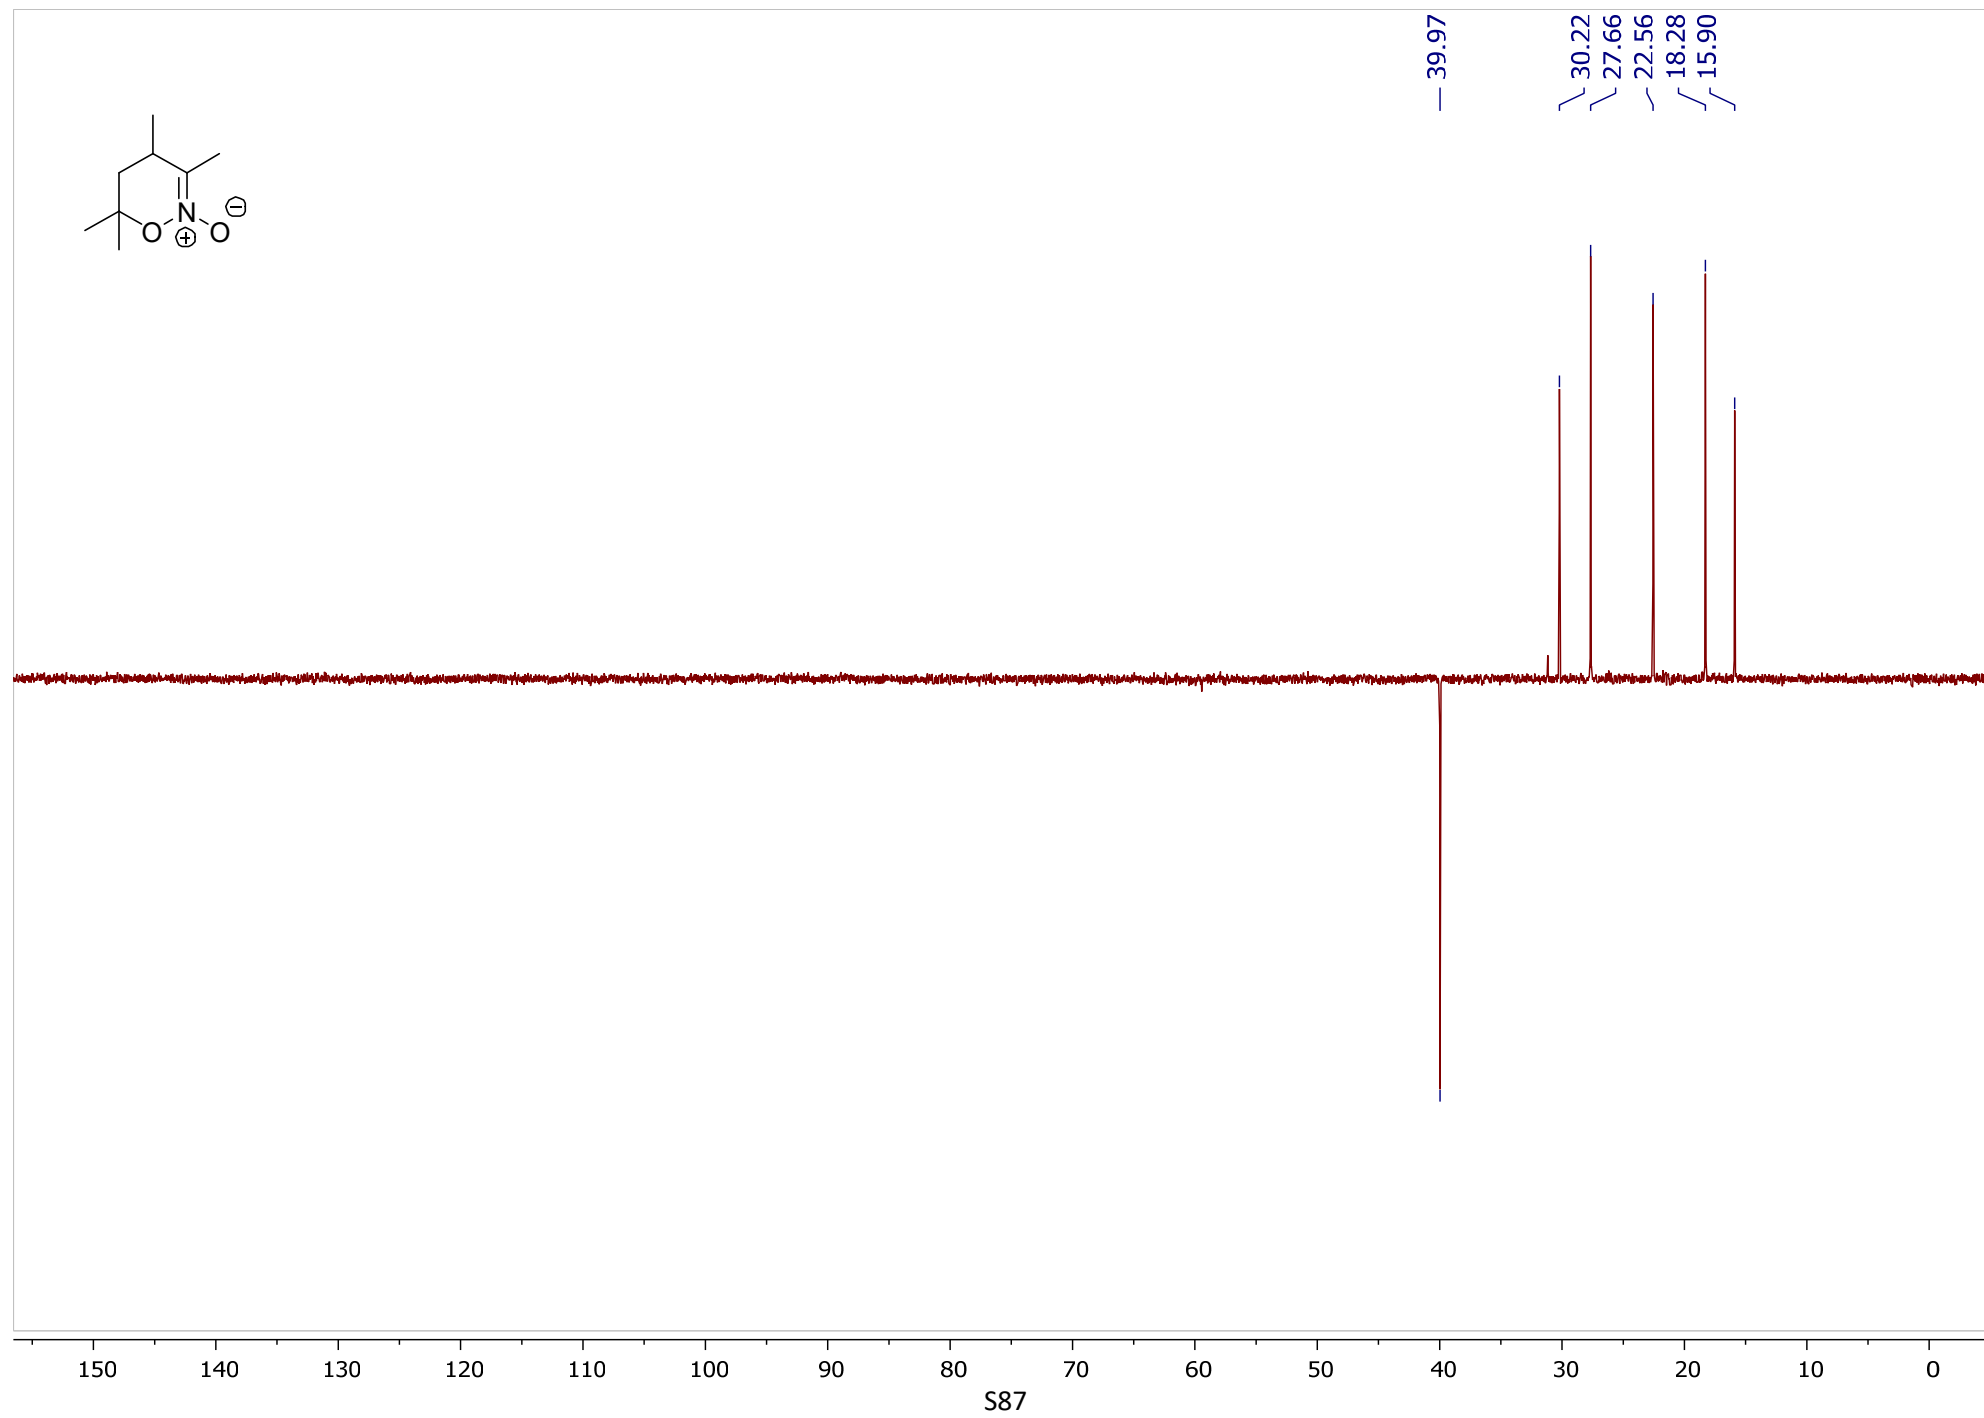

4-(Benzoyloxy)-3-ethyl-6,6-dimethyl-5,6-dihydro-4H-1,2-oxazine 2-oxide 1g

$^1\text{H}$  NMR (300 MHz,  $\text{CDCl}_3$ )

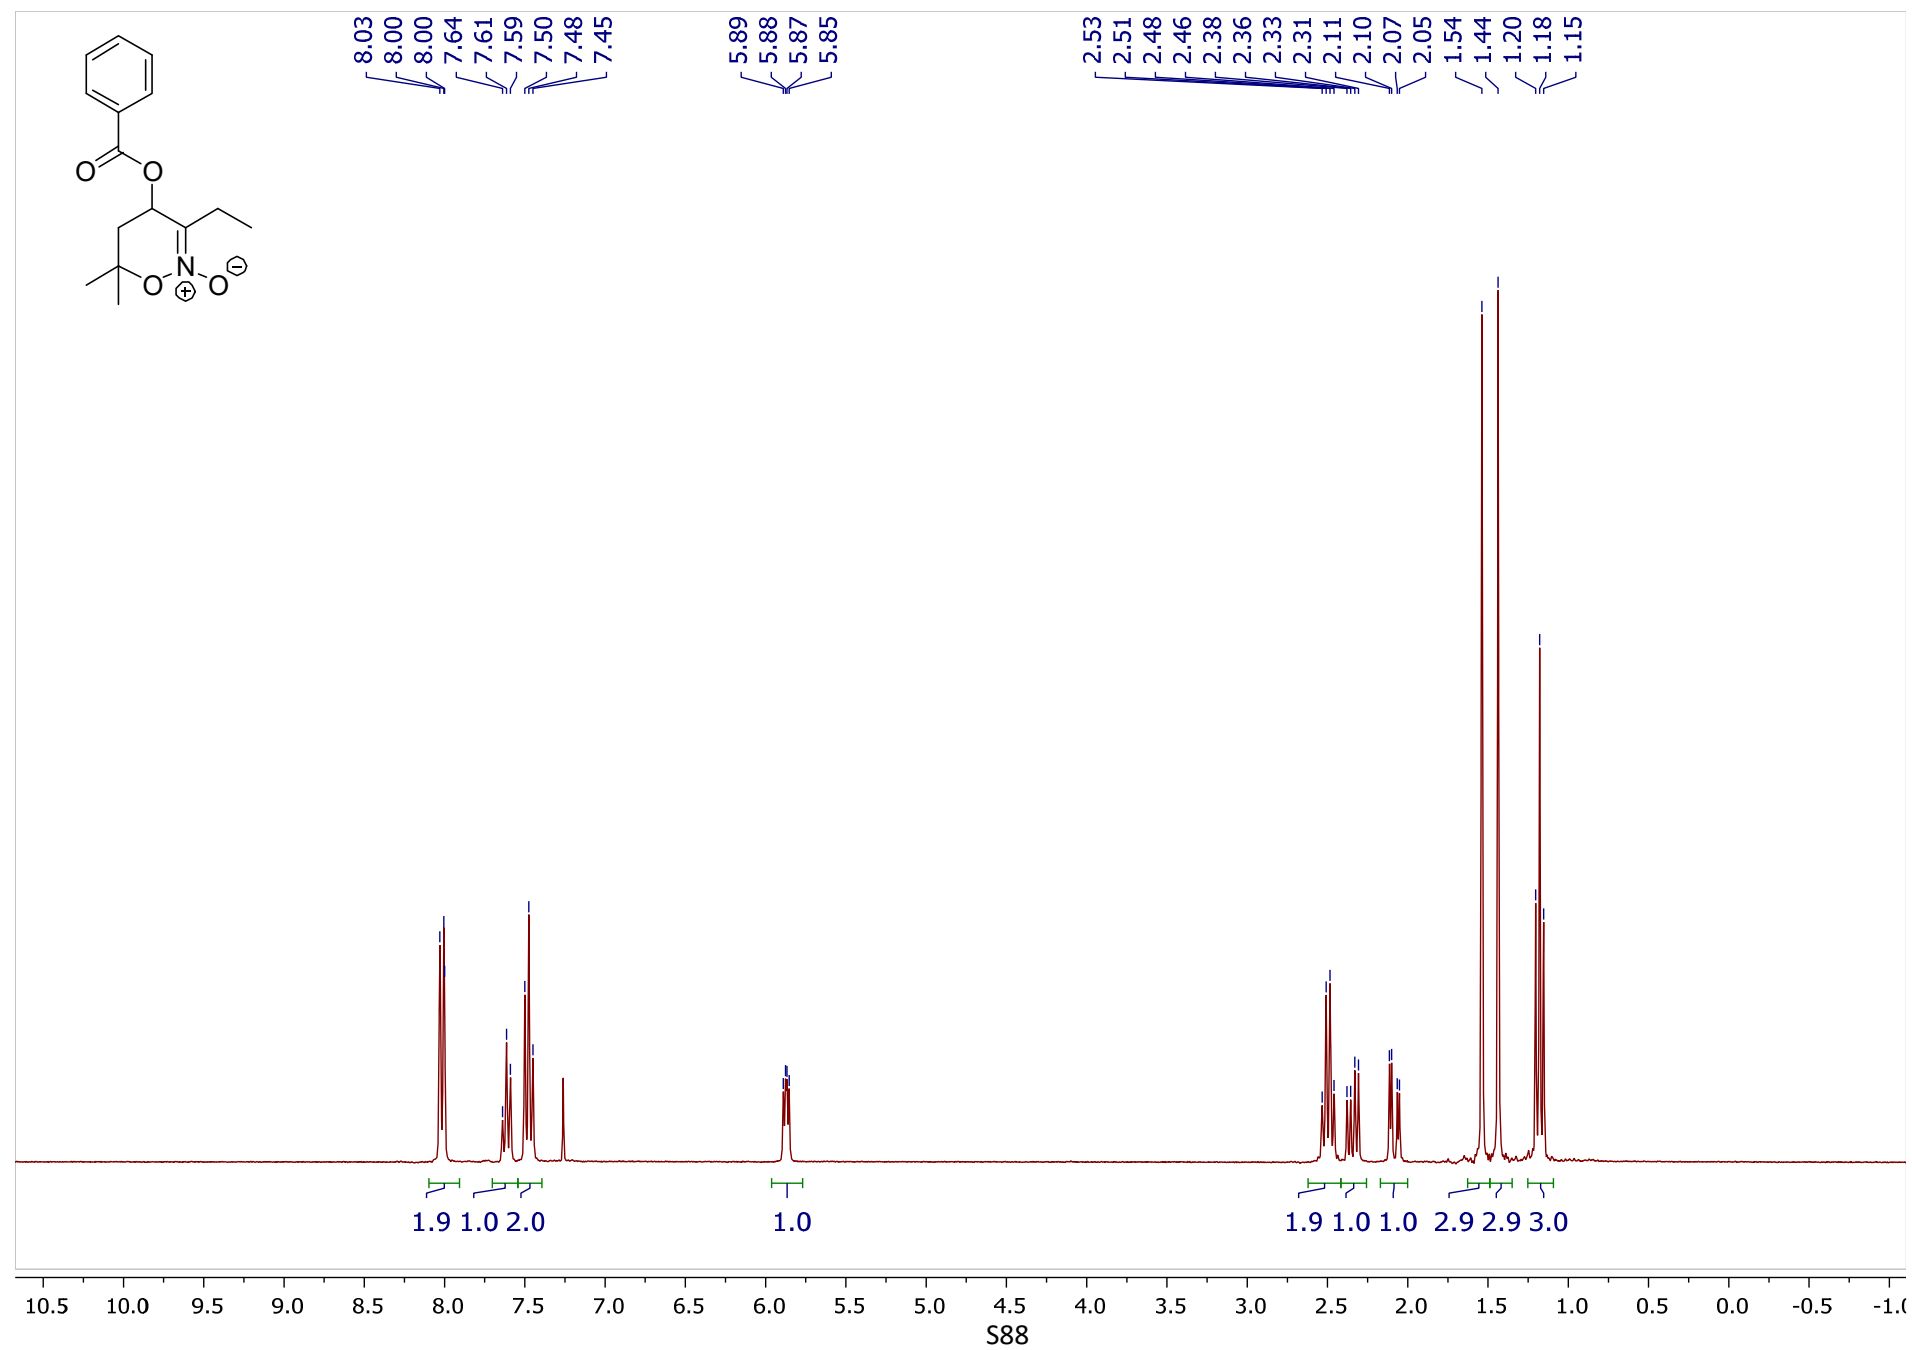



$^{13}\text{C}$  NMR (75 MHz,  $\text{CDCl}_3$ )

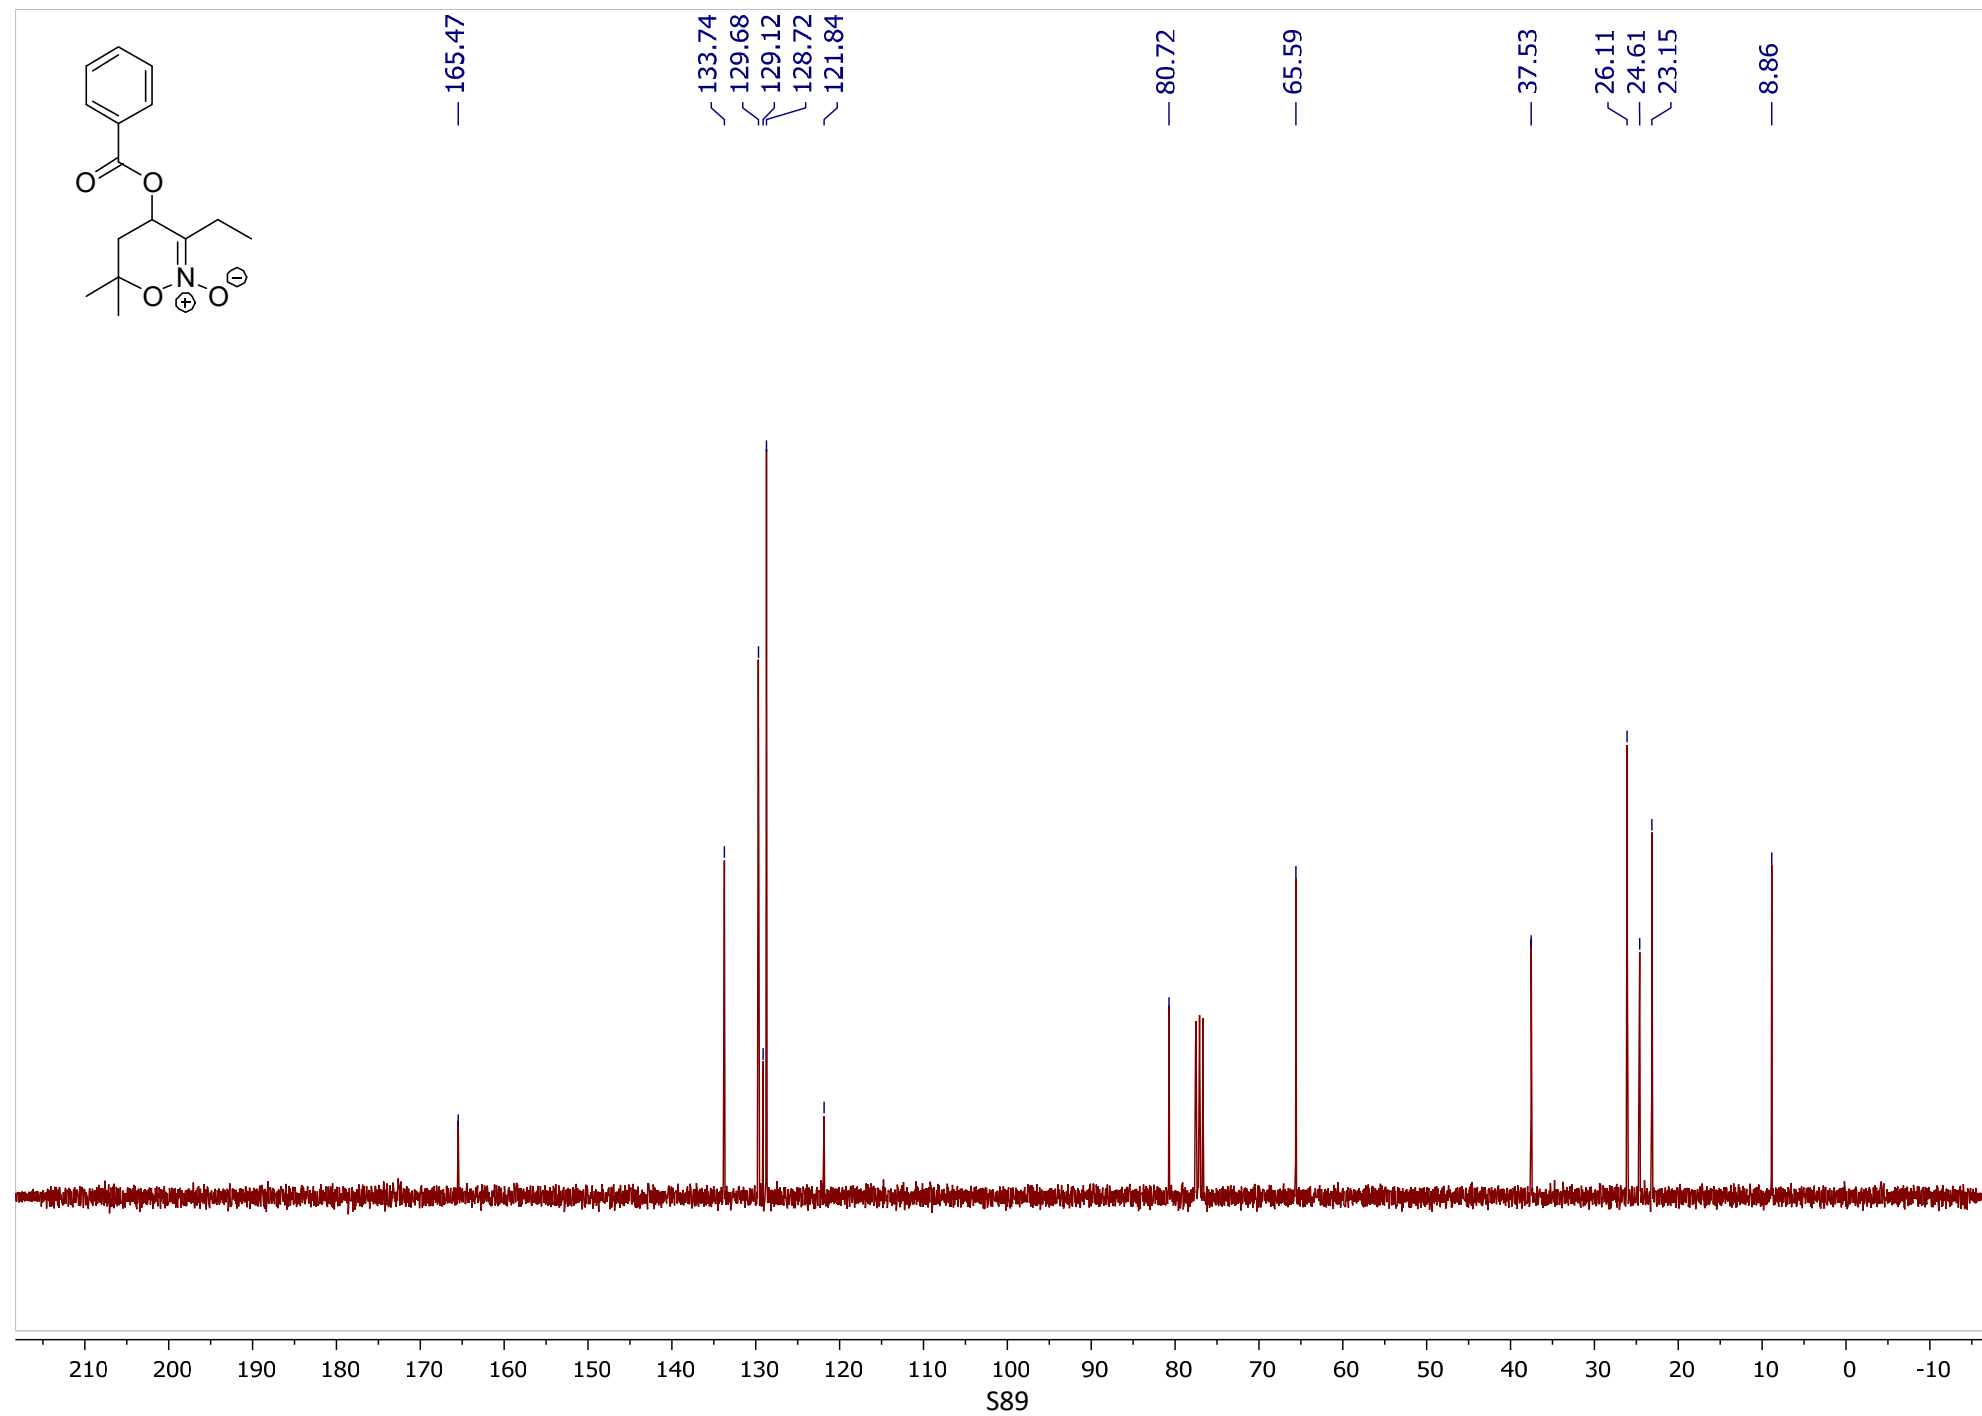

$^{13}\text{C}$  DEPT 135 (75 MHz,  $\text{CDCl}_3$ )

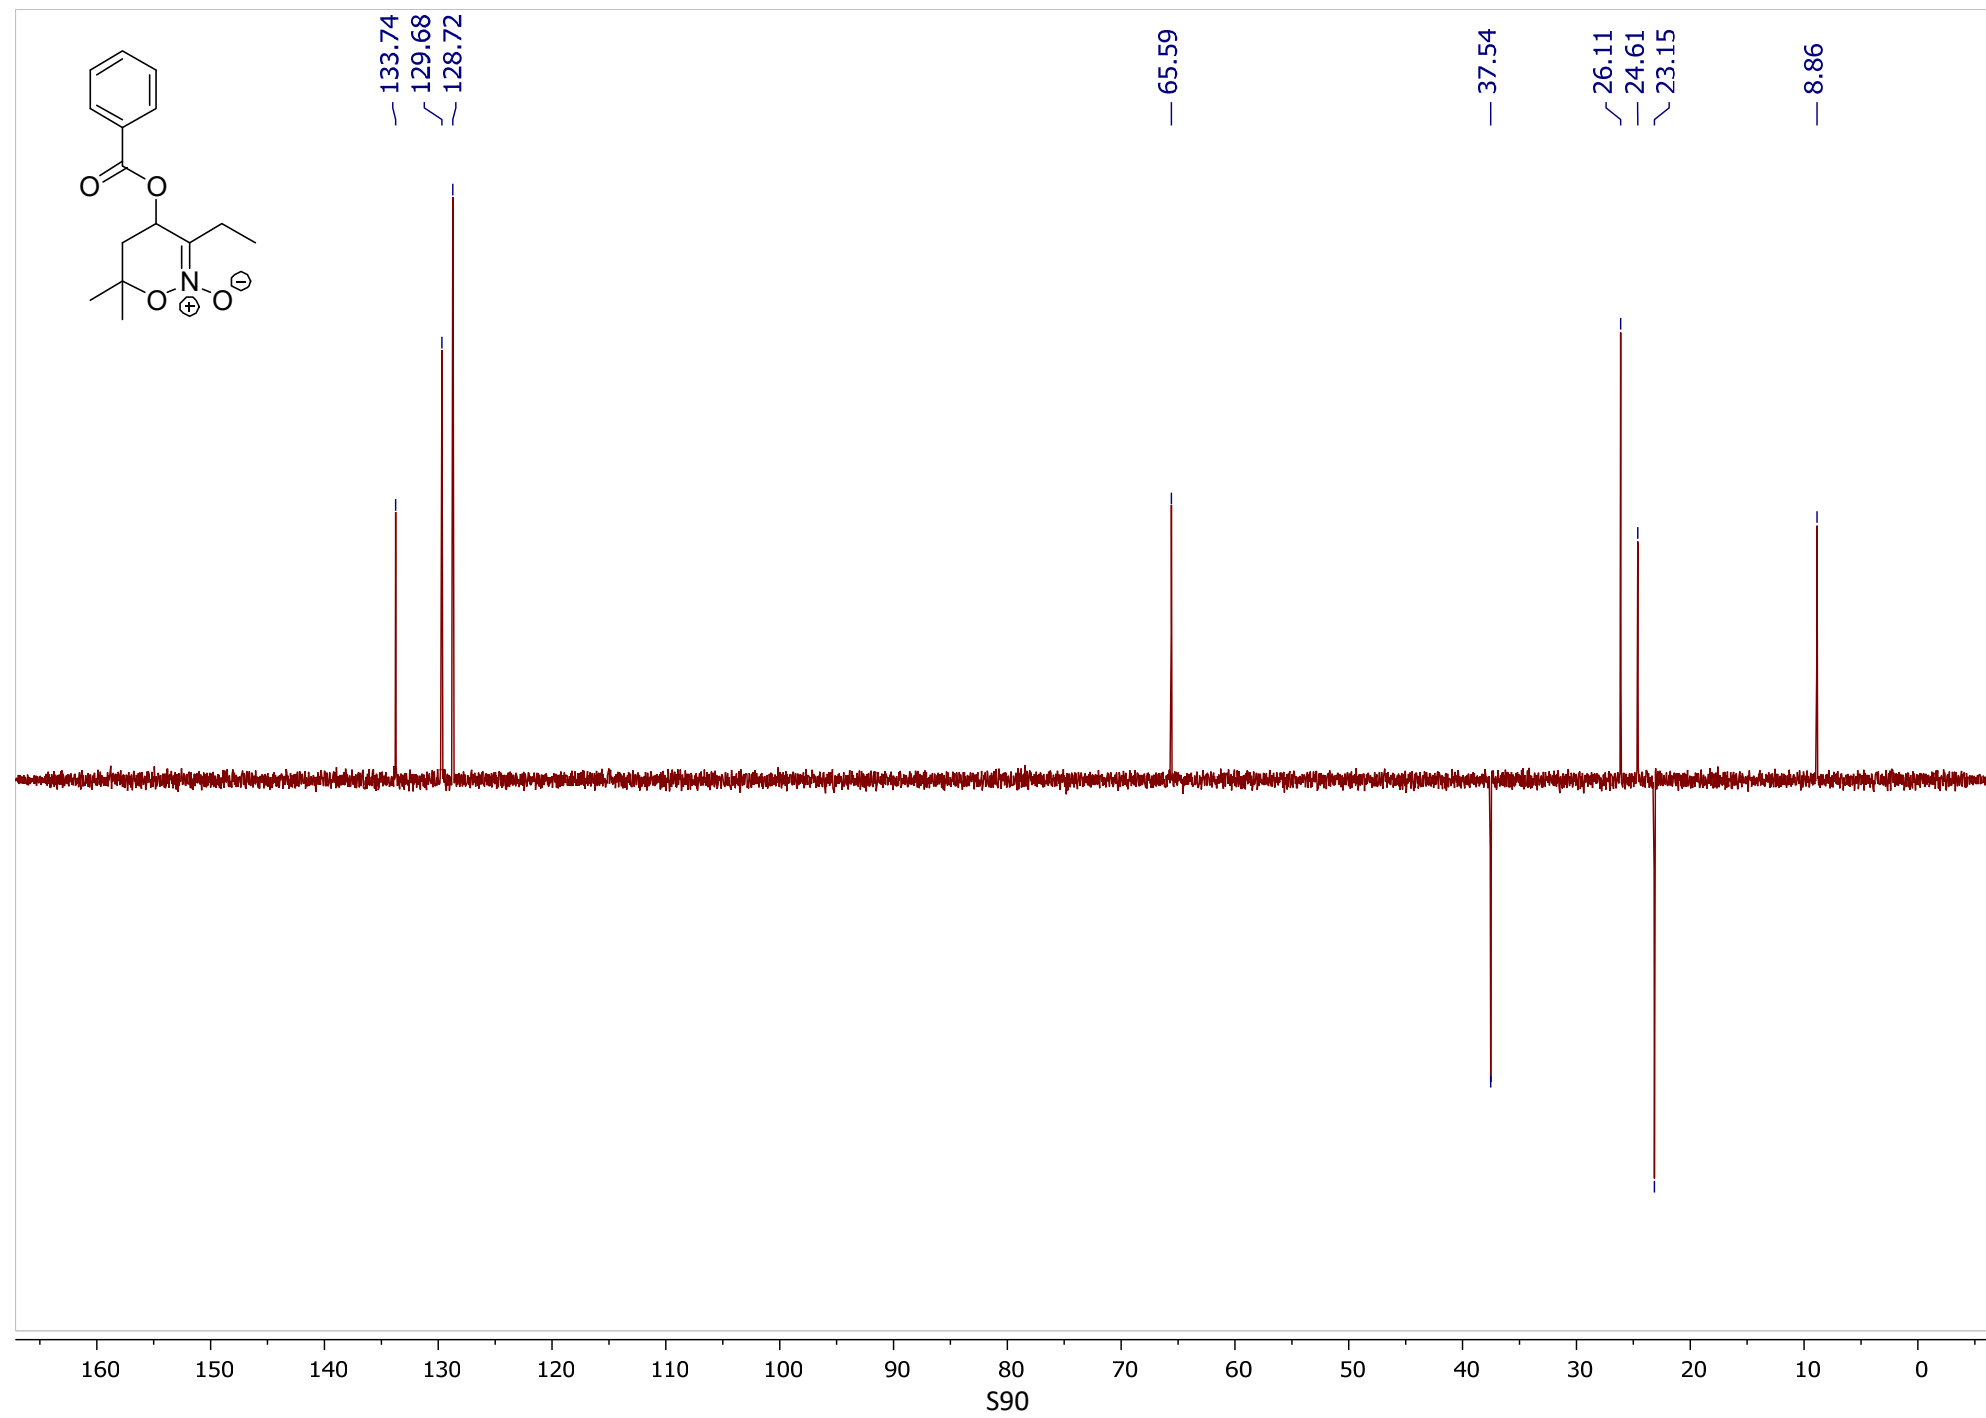

**3-(3-Methoxy-3-oxopropyl)-4-(4-methoxyphenyl)-6,6-dimethyl-5,6-dihydro-4H-1,2-oxazine 2-oxide 1h**

$^1\text{H}$  NMR (300 MHz,  $\text{CDCl}_3$ )

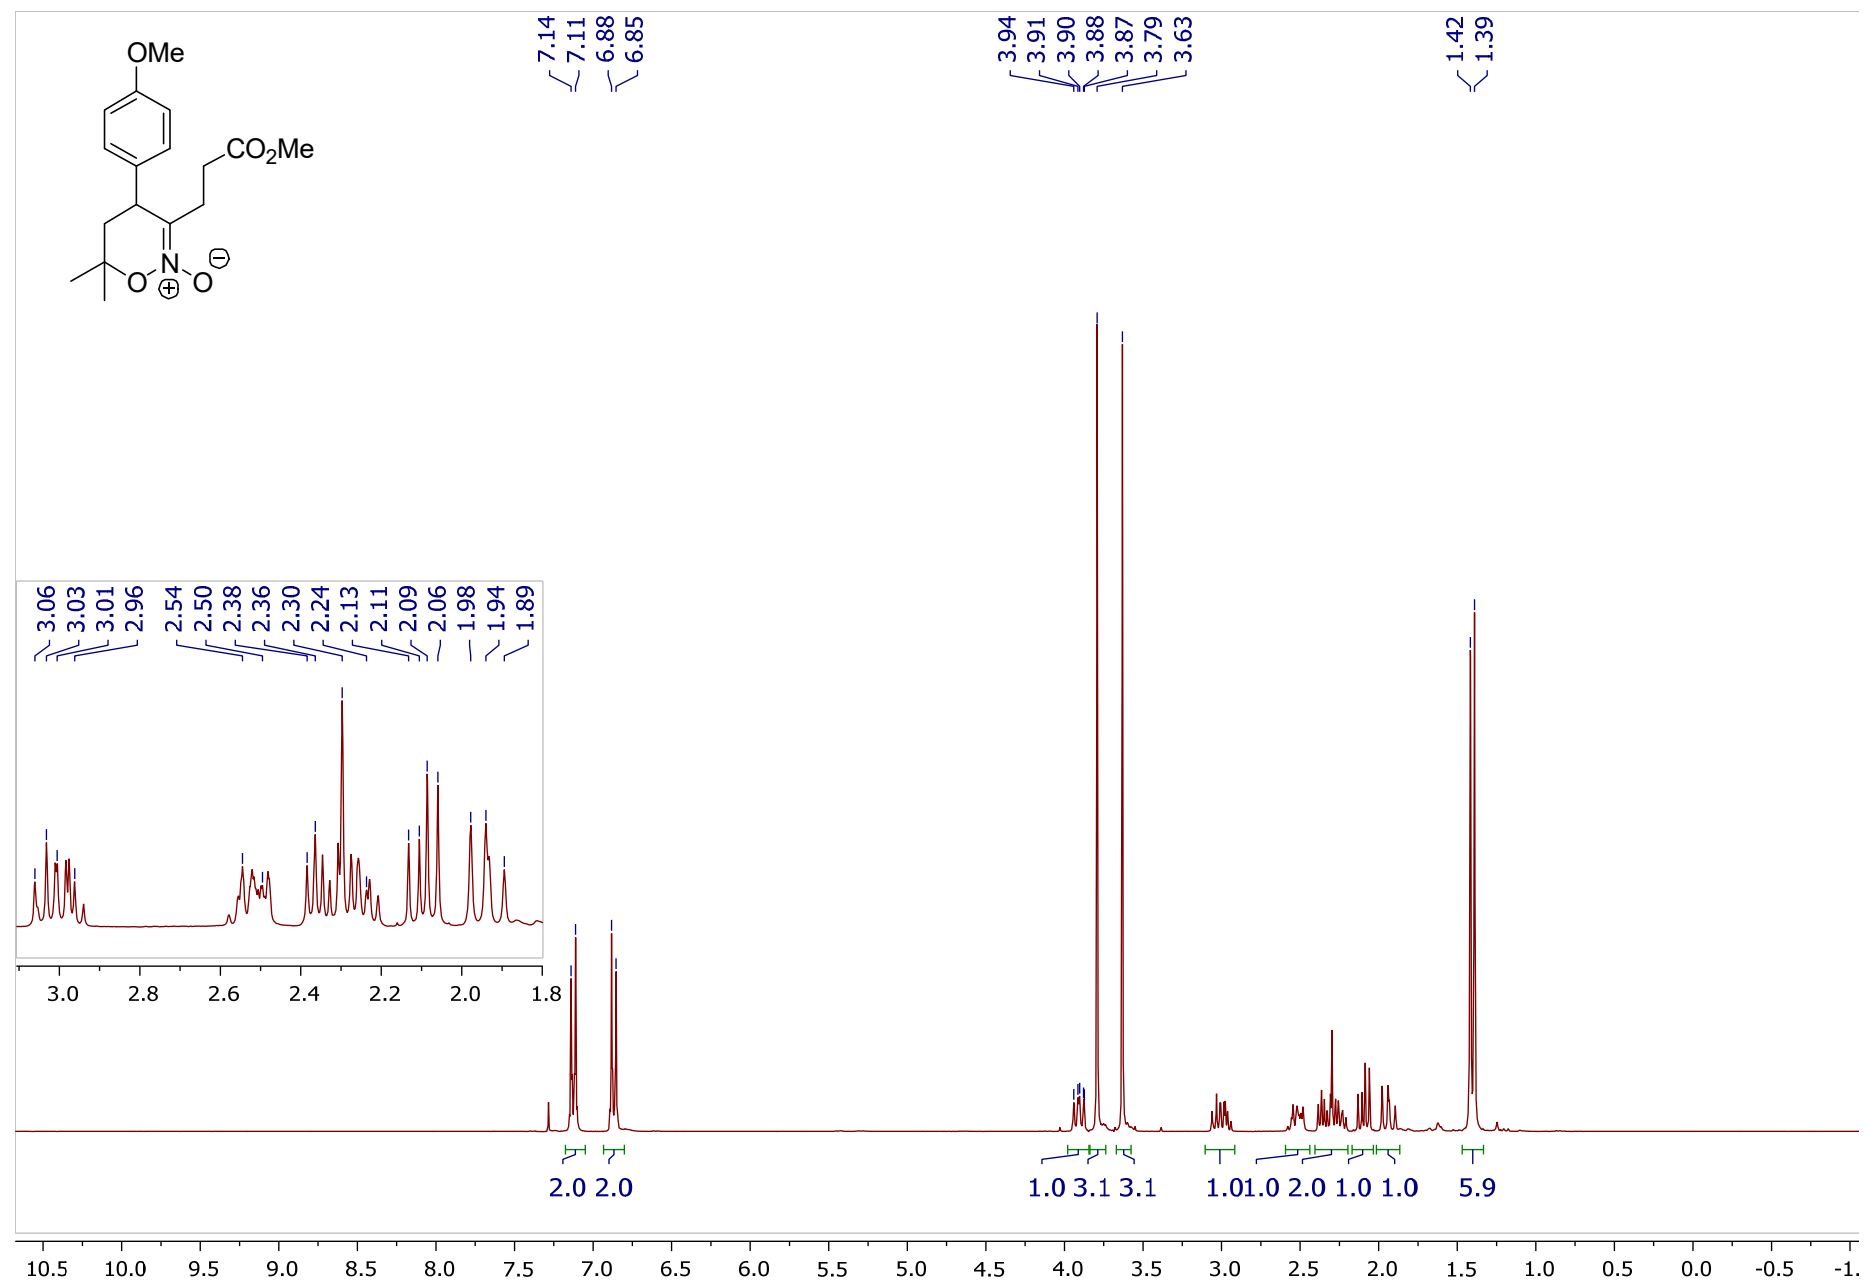



<sup>13</sup>C DEPT 135 (75 MHz, CDCl<sub>3</sub>)

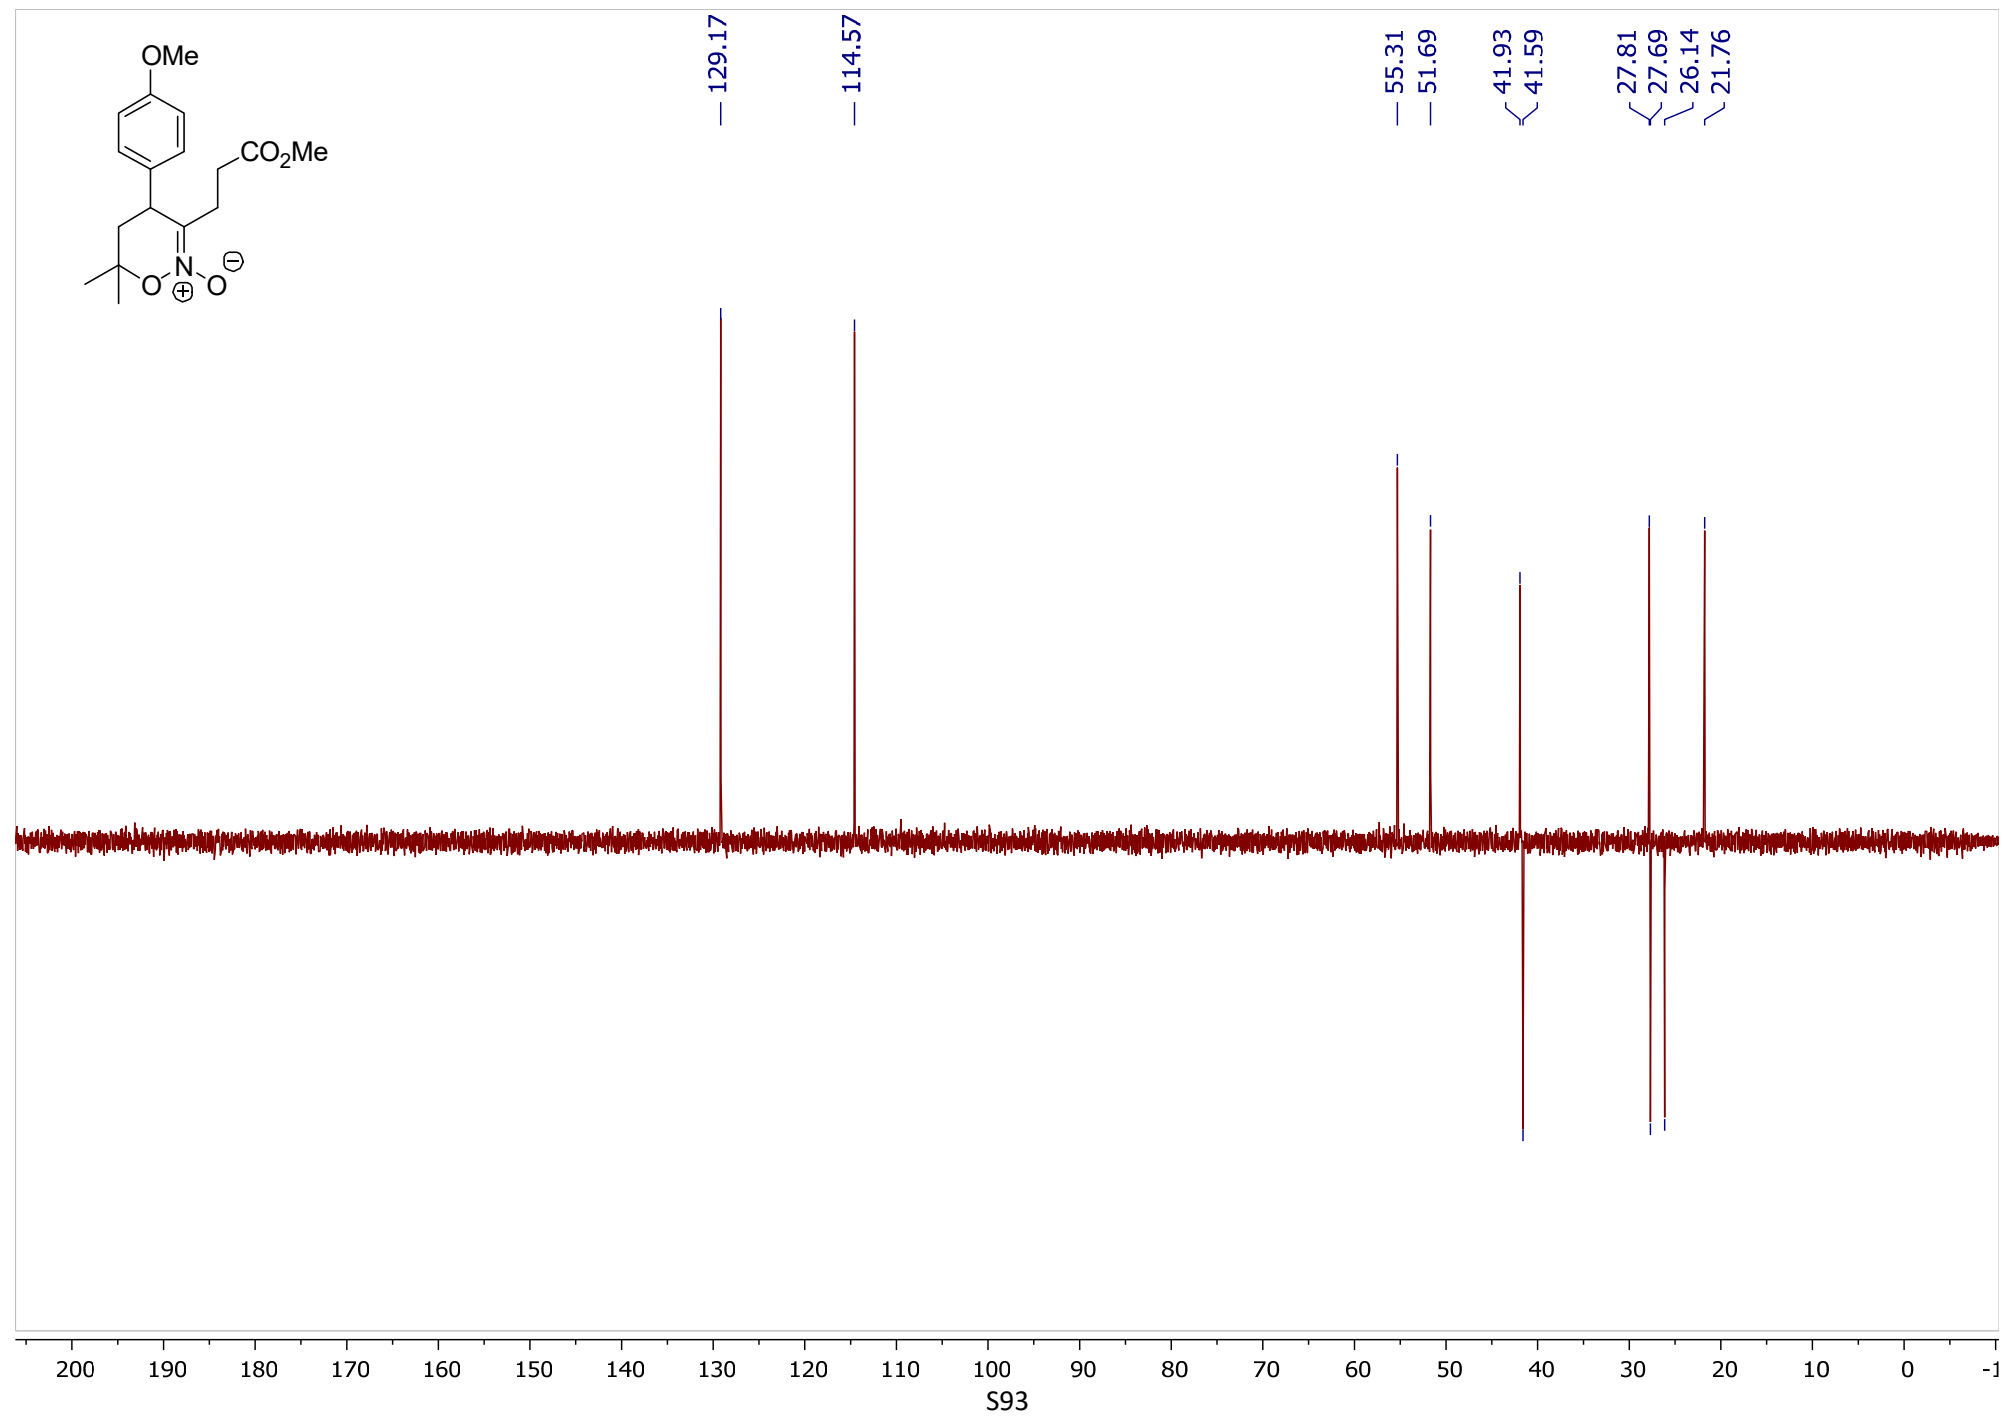

**(4*S*\*,6*R*\*)-4-(4-Methoxyphenyl)-3-methyl-6-propyl-5,6-dihydro-4H-1,2-oxazine 2-oxide 1i**

<sup>1</sup>H NMR (300 MHz, CDCl<sub>3</sub>)

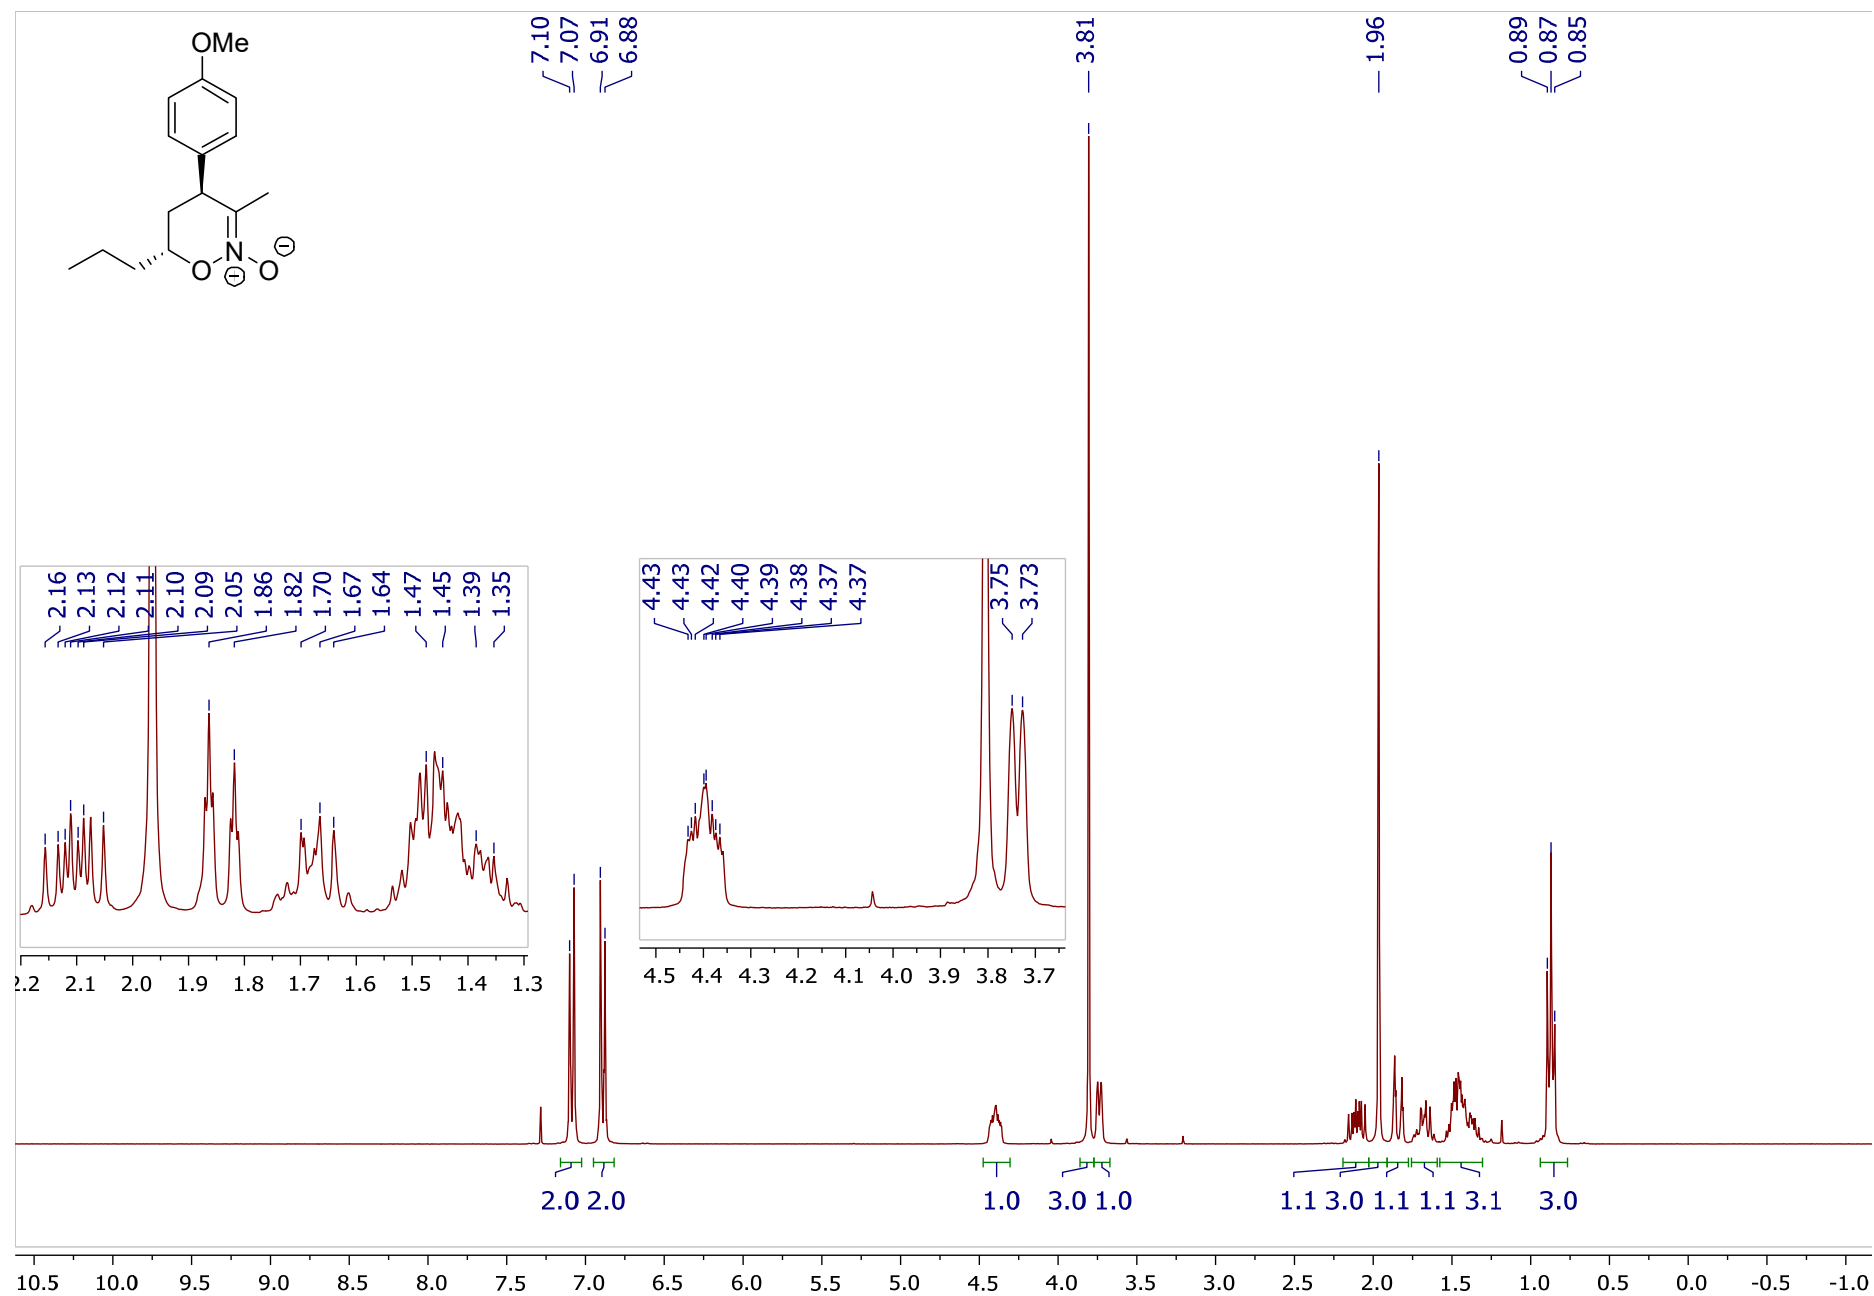

$^{13}\text{C}$  NMR (75 MHz,  $\text{CDCl}_3$ )

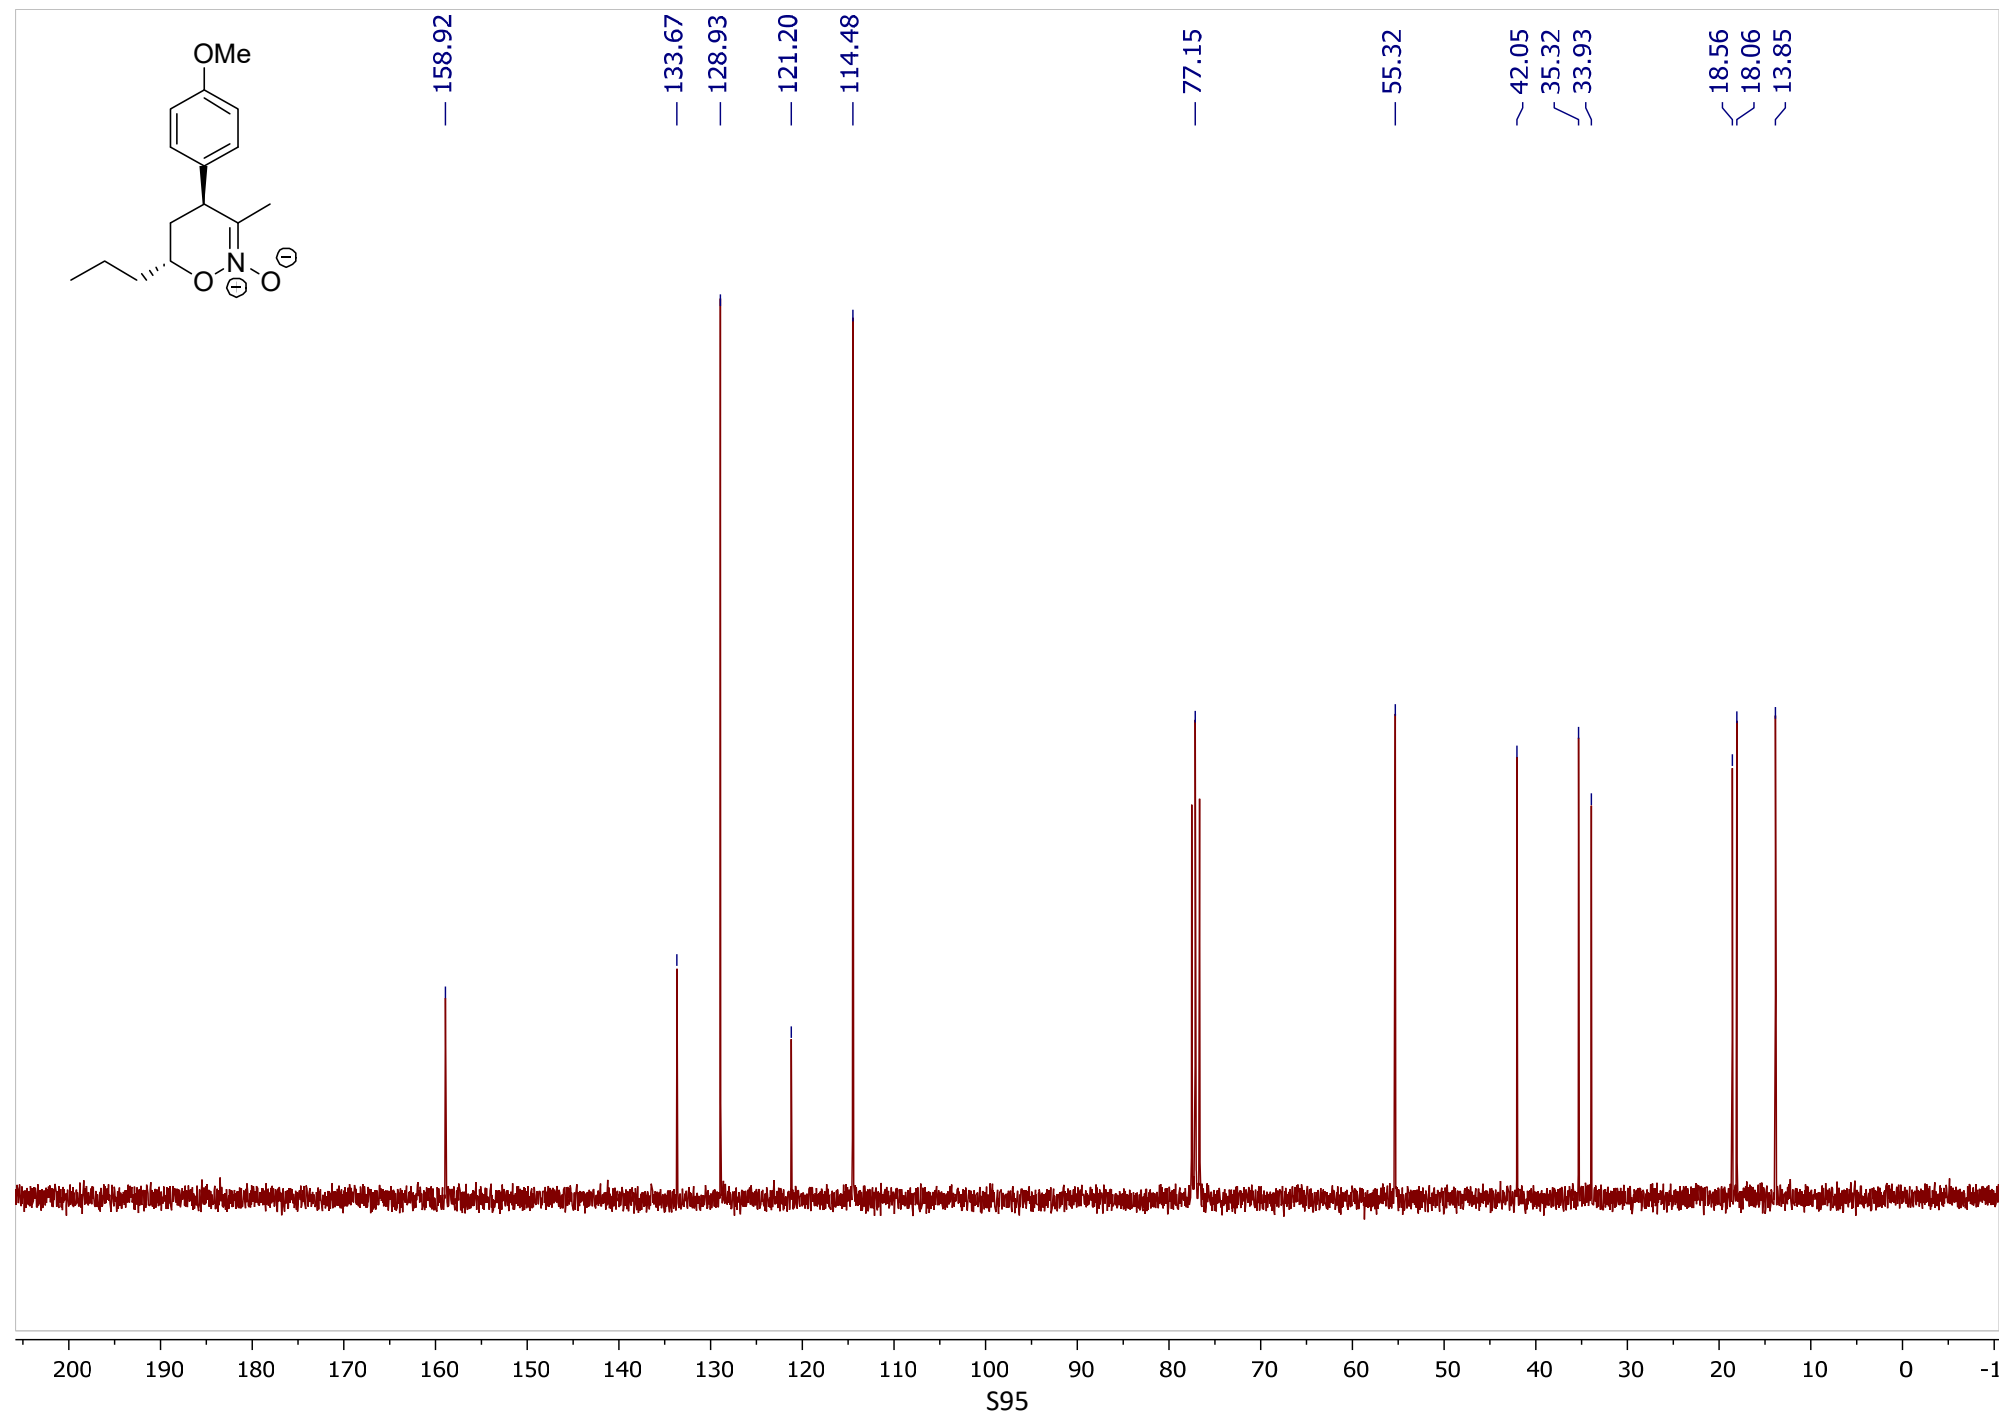

$^{13}\text{C}$  DEPT 135 (75 MHz,  $\text{CDCl}_3$ )

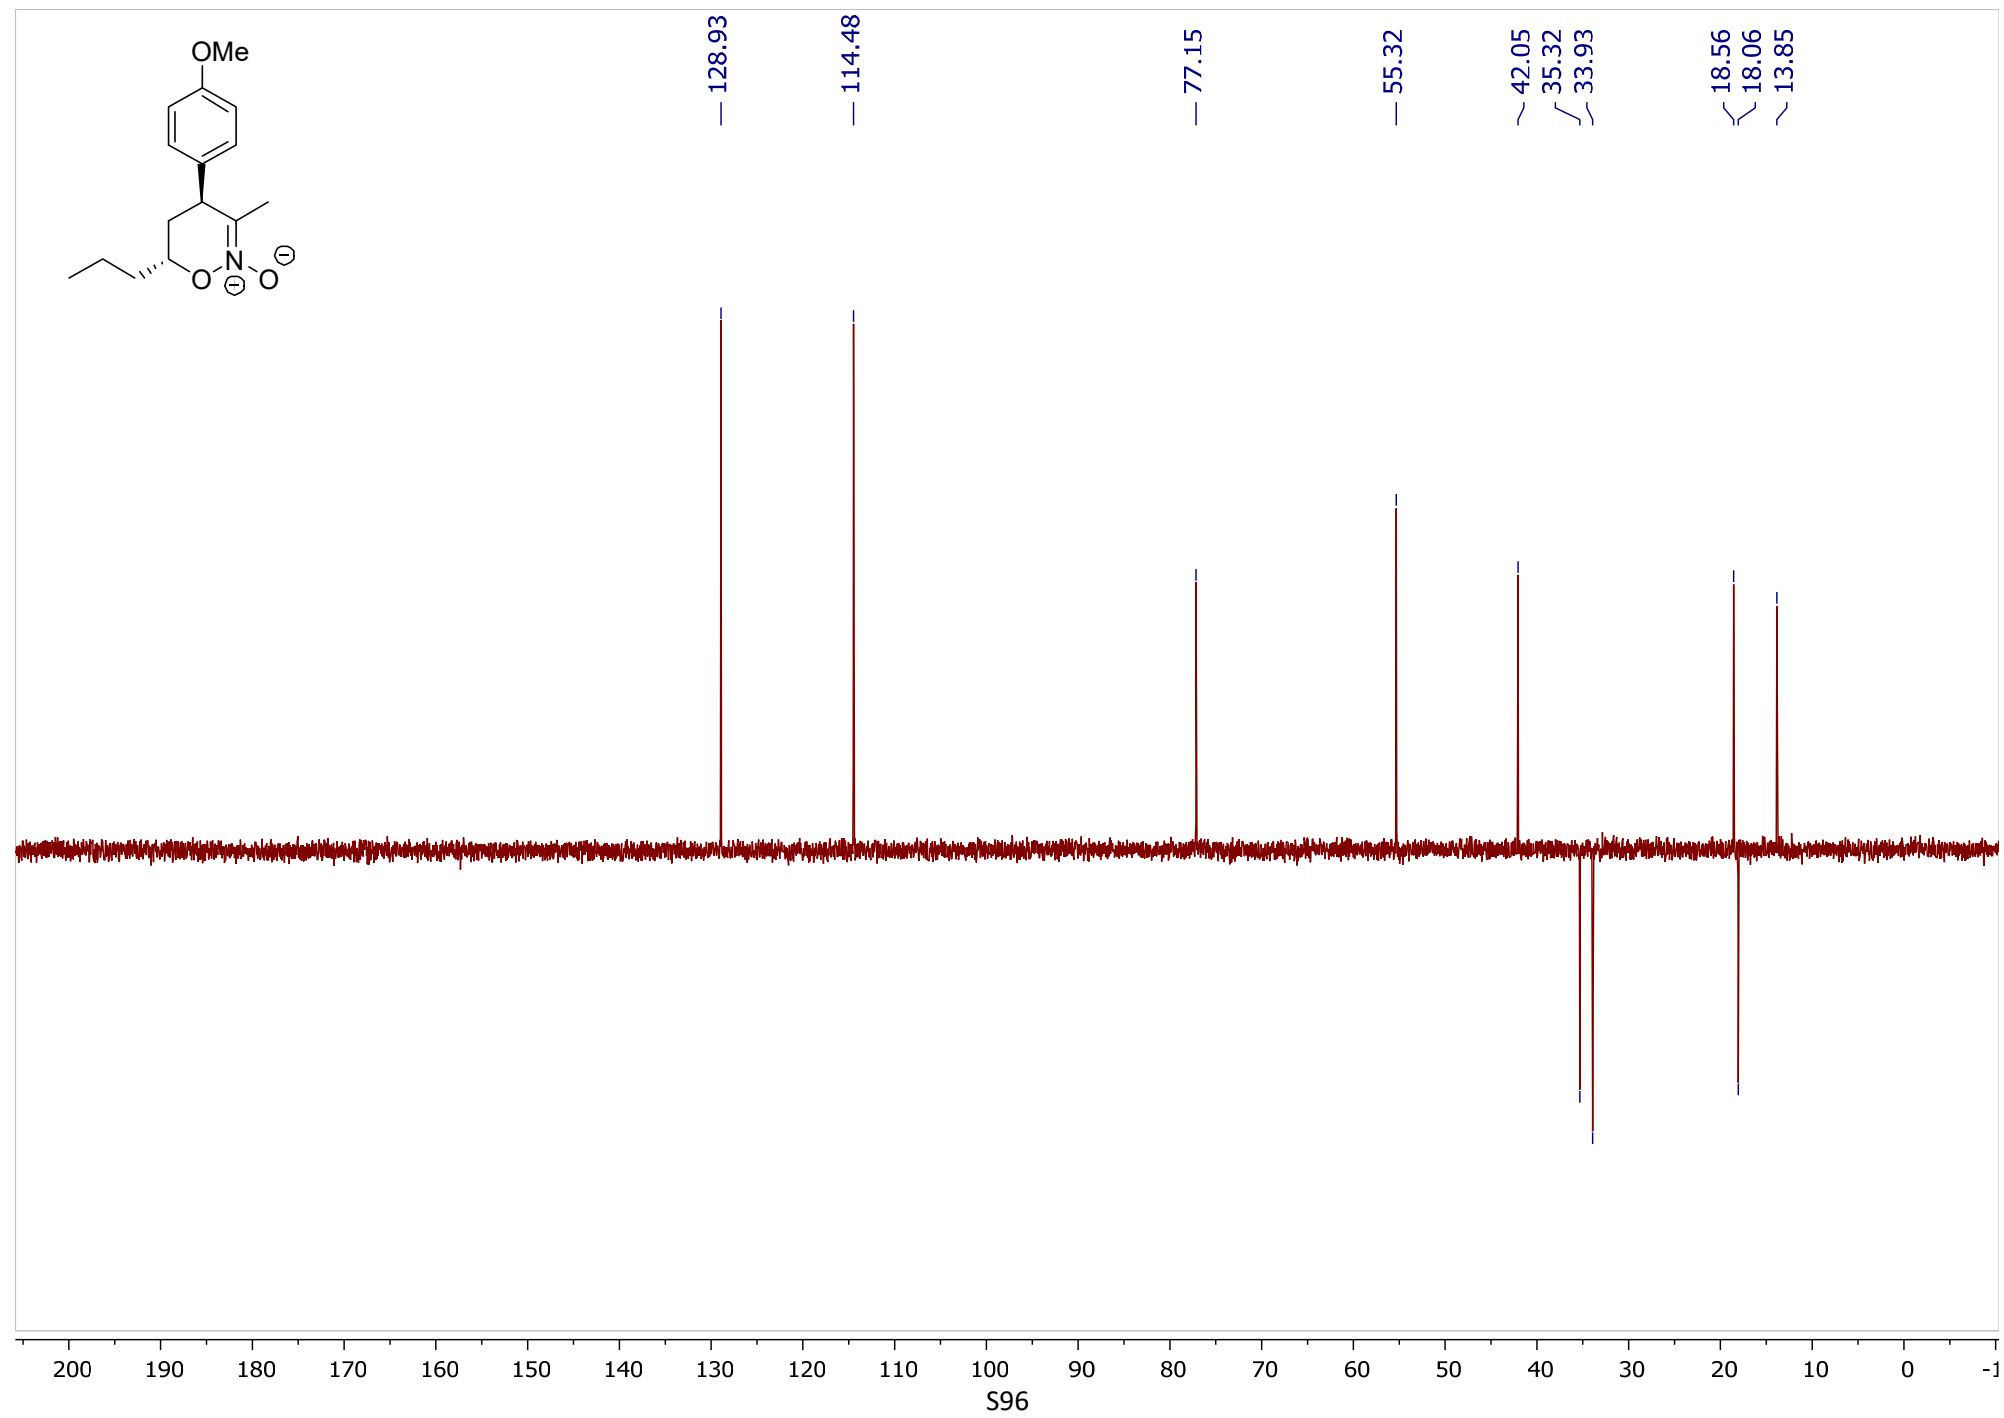



**(4*S*\*,6*R*\*)-4-(4-Methoxyphenyl)-3-methyl-6-phenyl-5,6-dihydro-4H-1,2-oxazine 2-oxide 1j**

<sup>1</sup>H NMR (300 MHz, CDCl<sub>3</sub>)

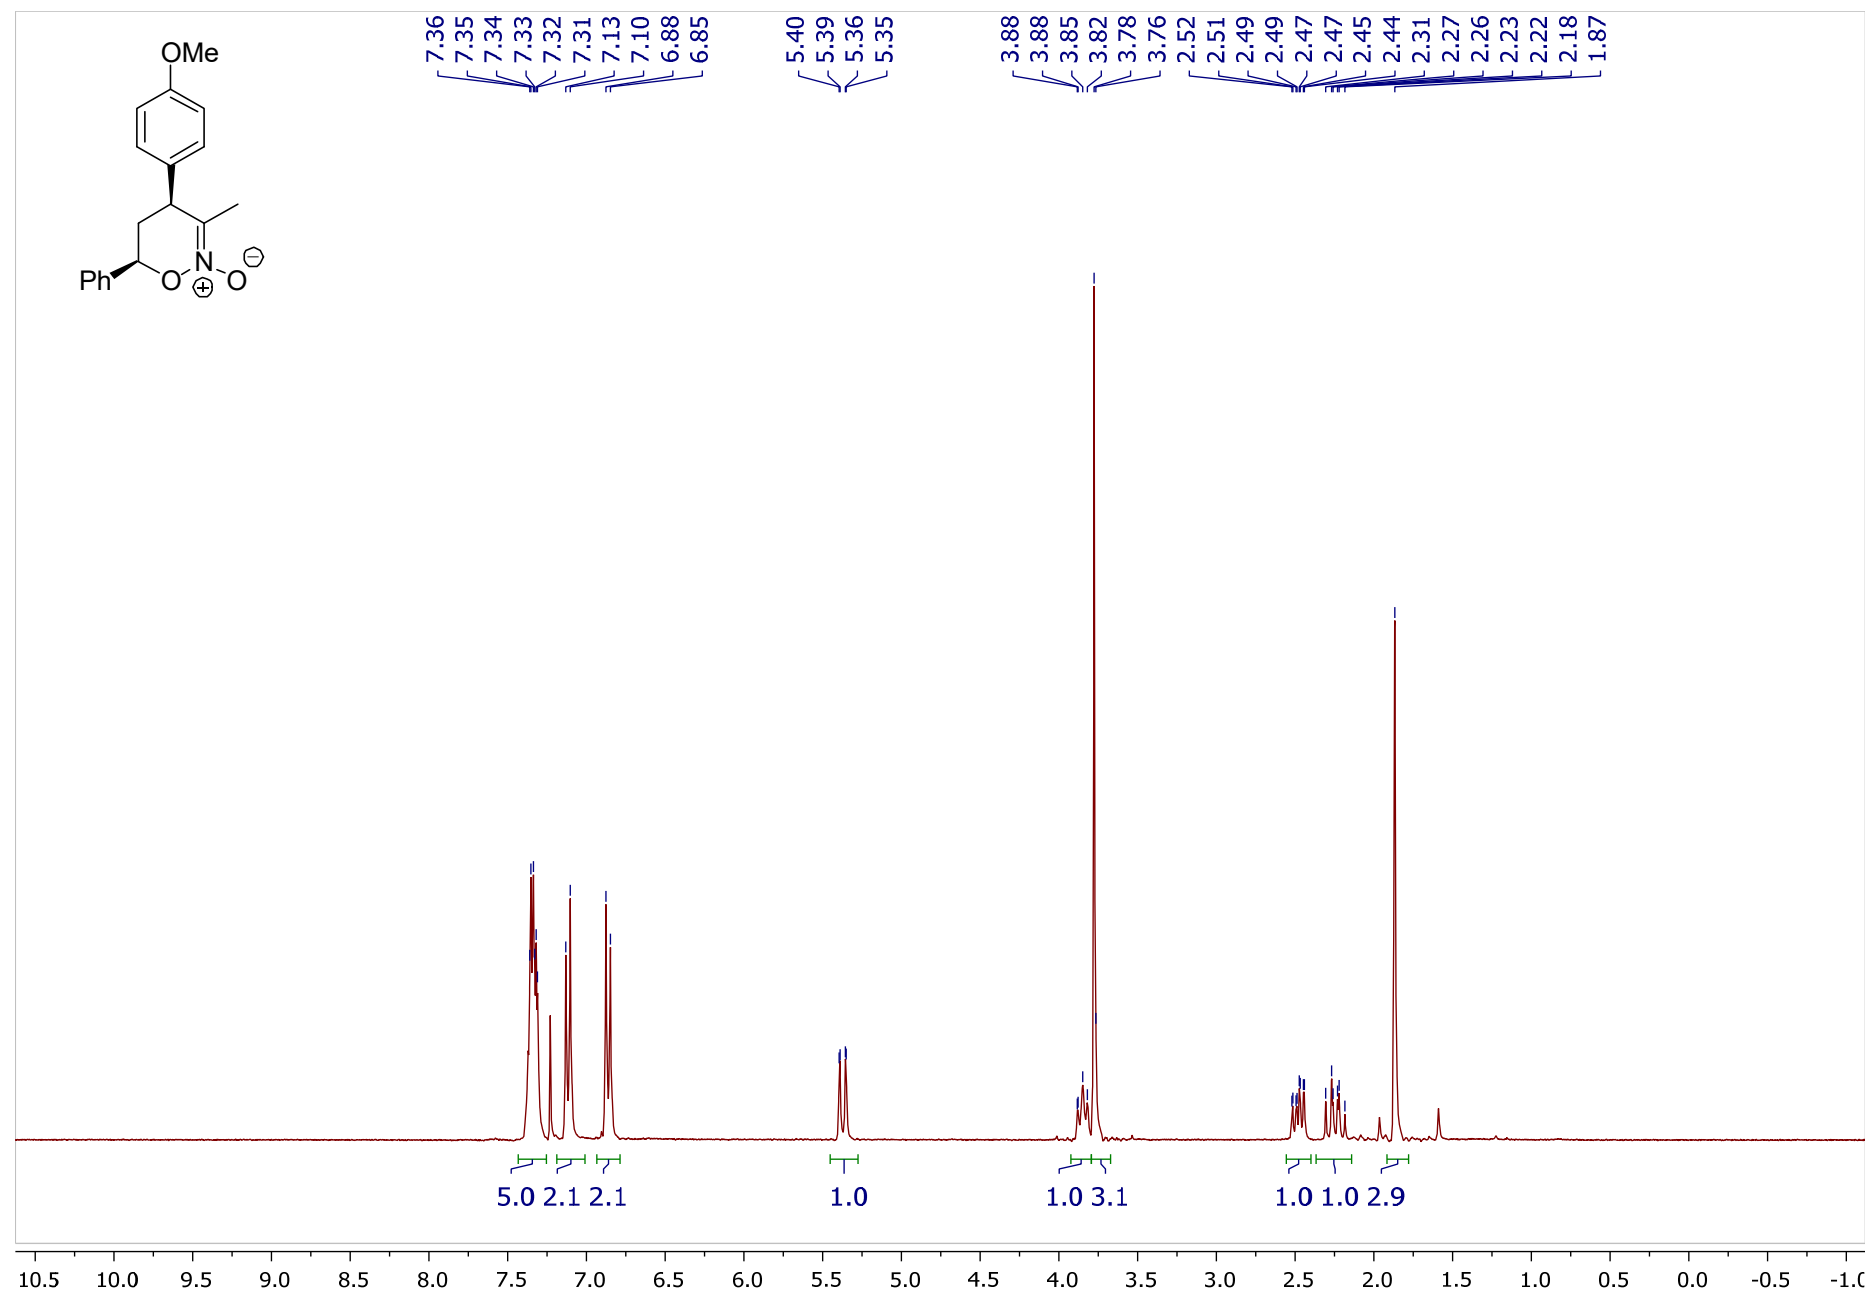

$^{13}\text{C}$  NMR (75 MHz,  $\text{CDCl}_3$ )

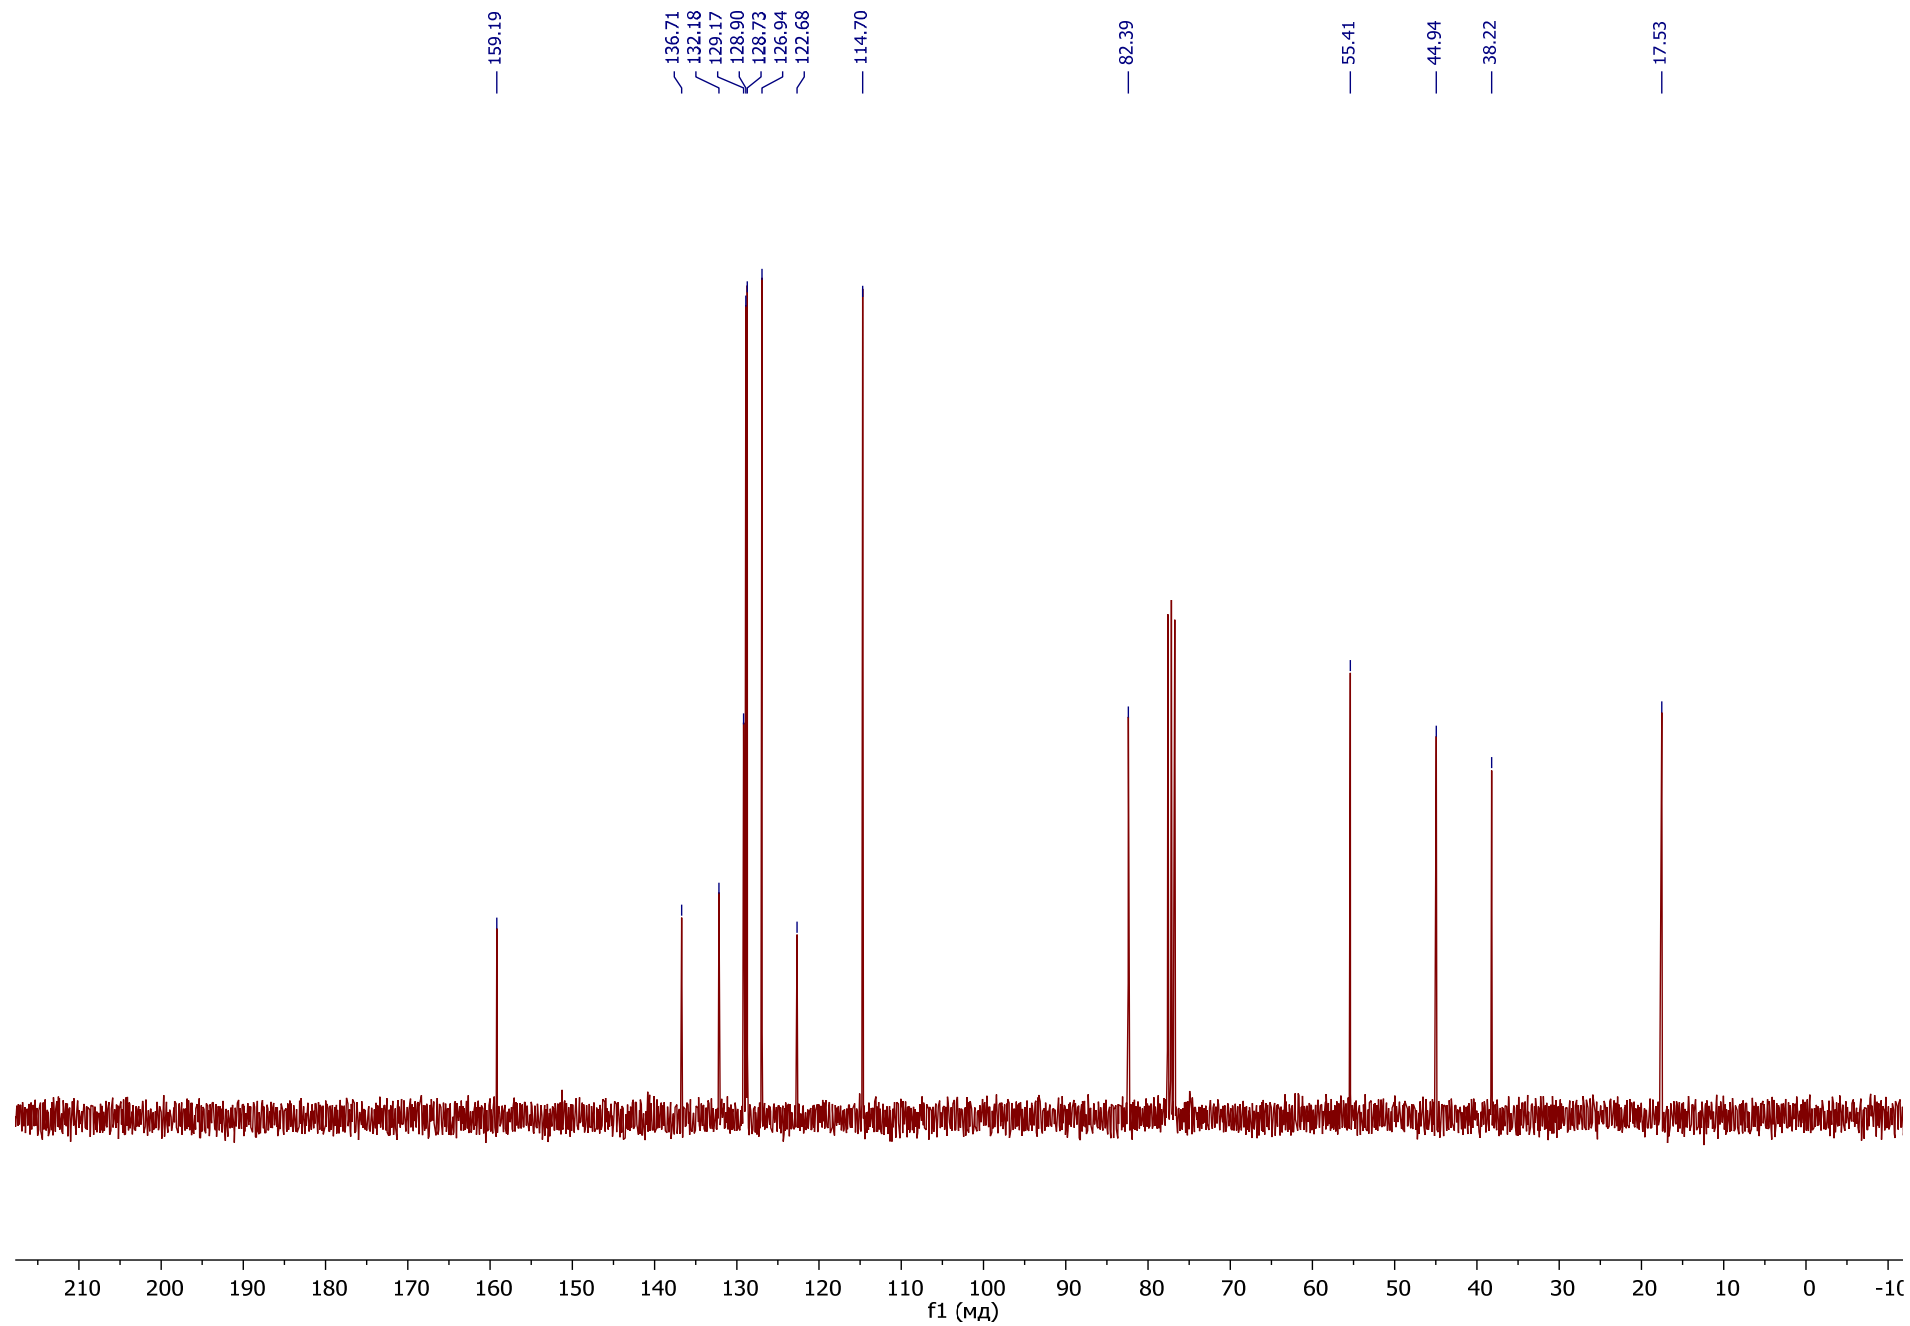

$^{13}\text{C}$  DEPT 135 (75 MHz,  $\text{CDCl}_3$ )

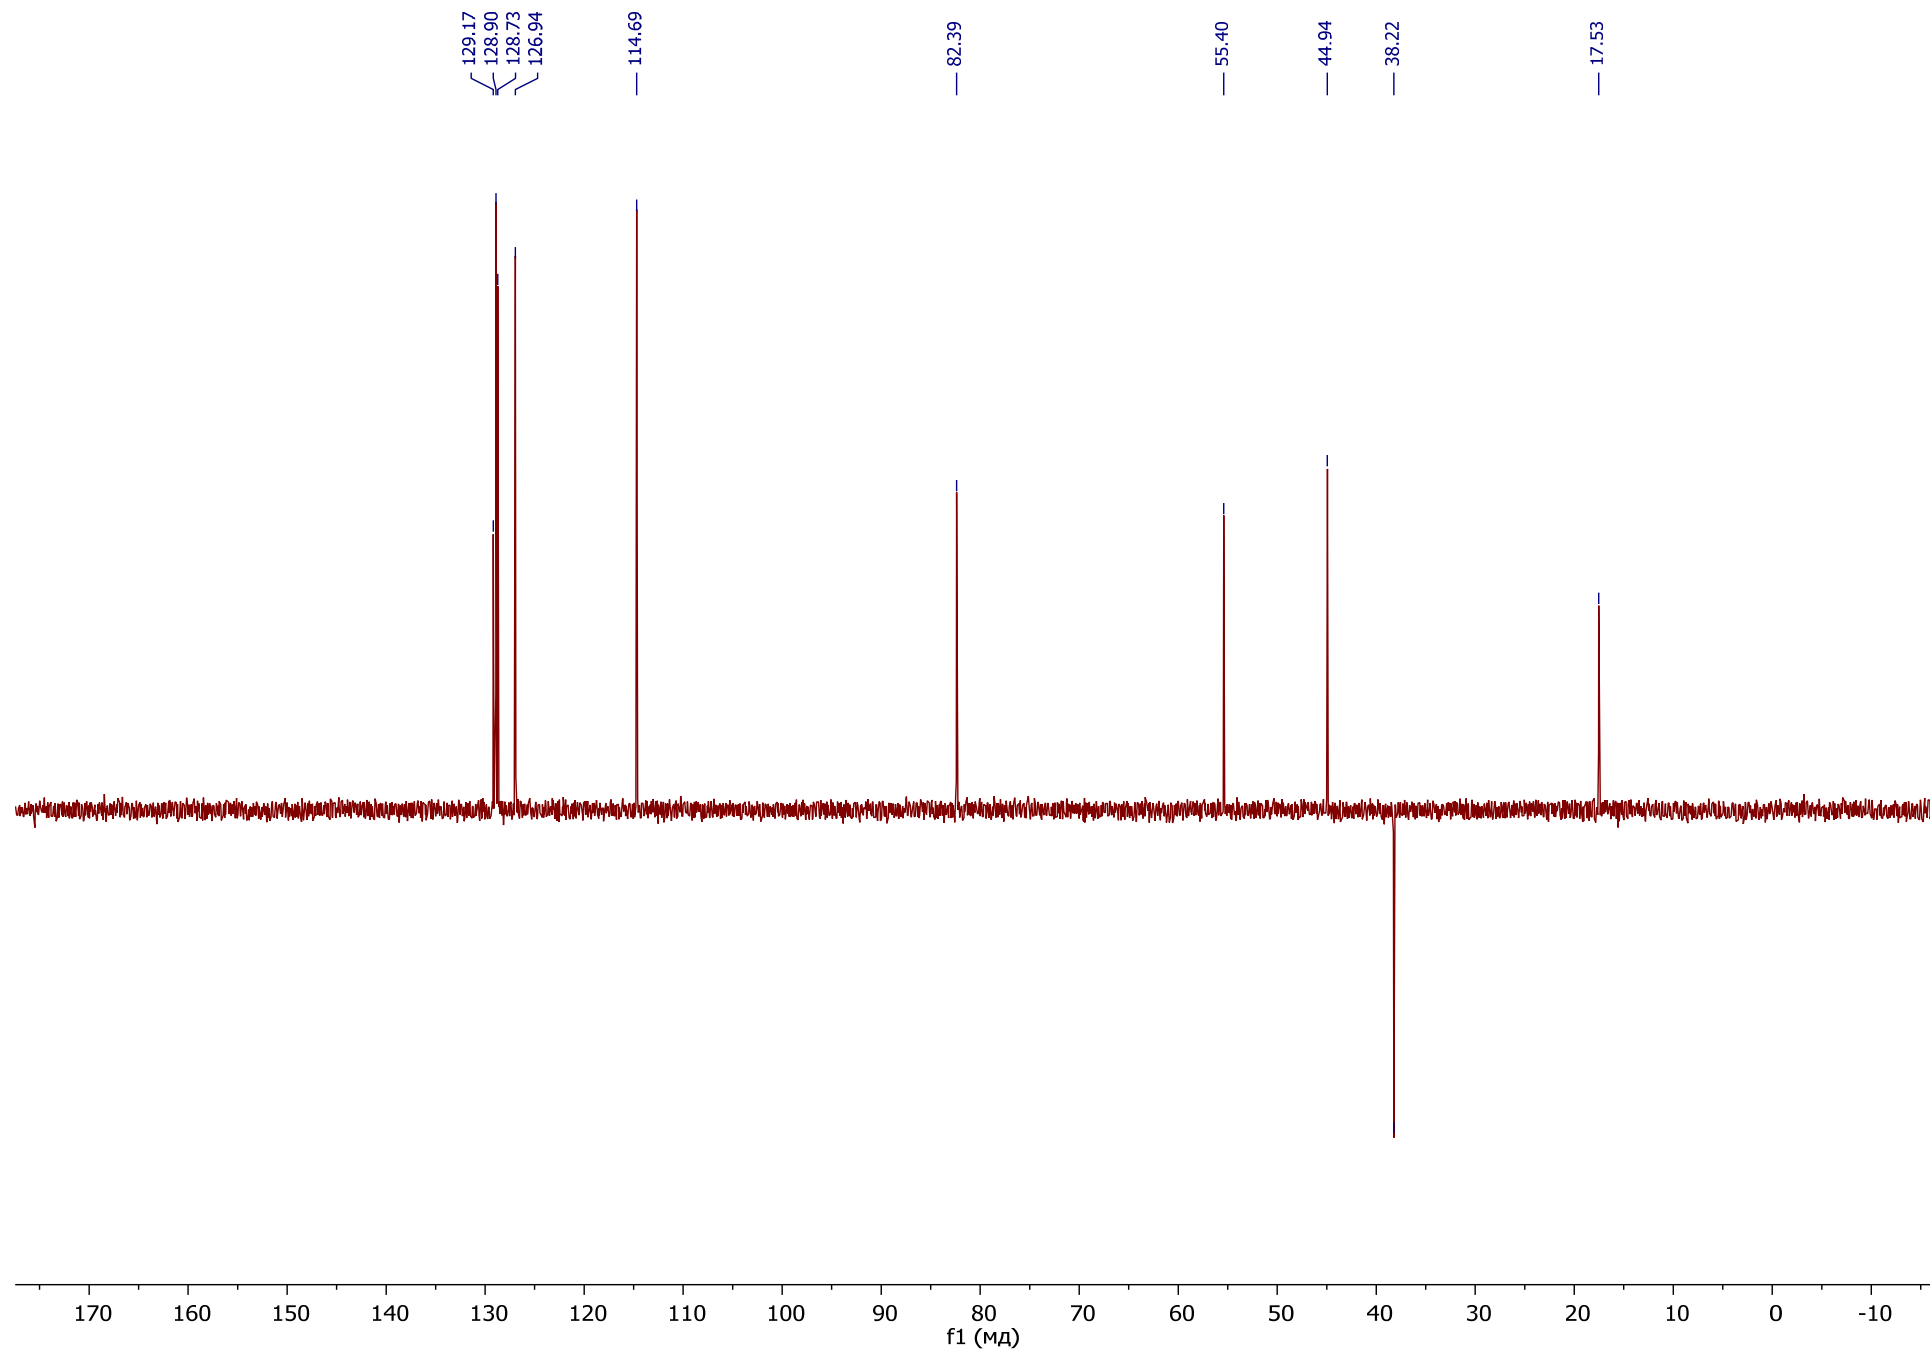

**(4*S*\*,6*S*\*)-4-(4-Methoxyphenyl)-3-methyl-6-phenyl-5,6-dihydro-4H-1,2-oxazine 2-oxide 1k**

<sup>1</sup>H NMR (300 MHz, CDCl<sub>3</sub>)

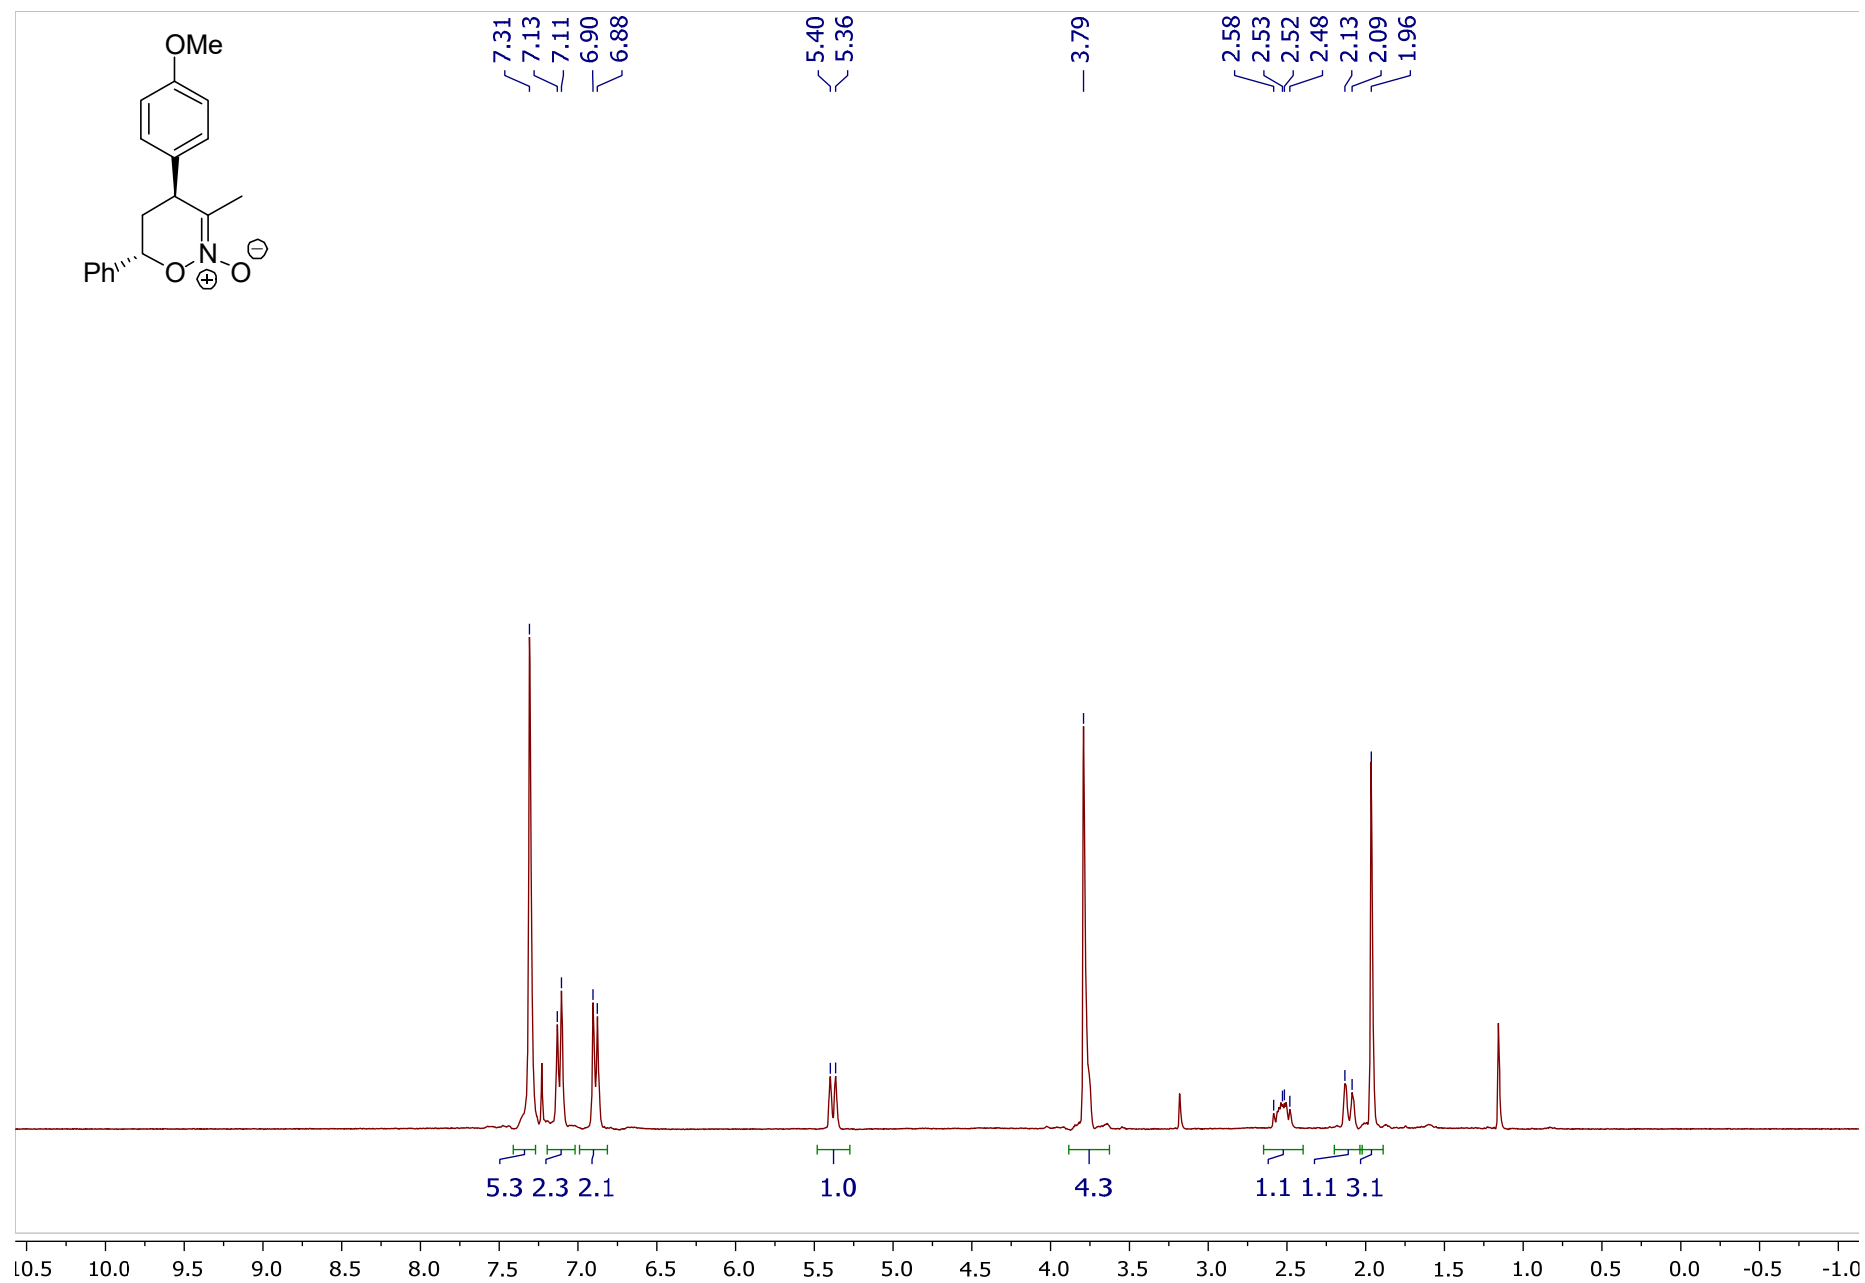

$^{13}\text{C}$  NMR (75 MHz,  $\text{CDCl}_3$ )

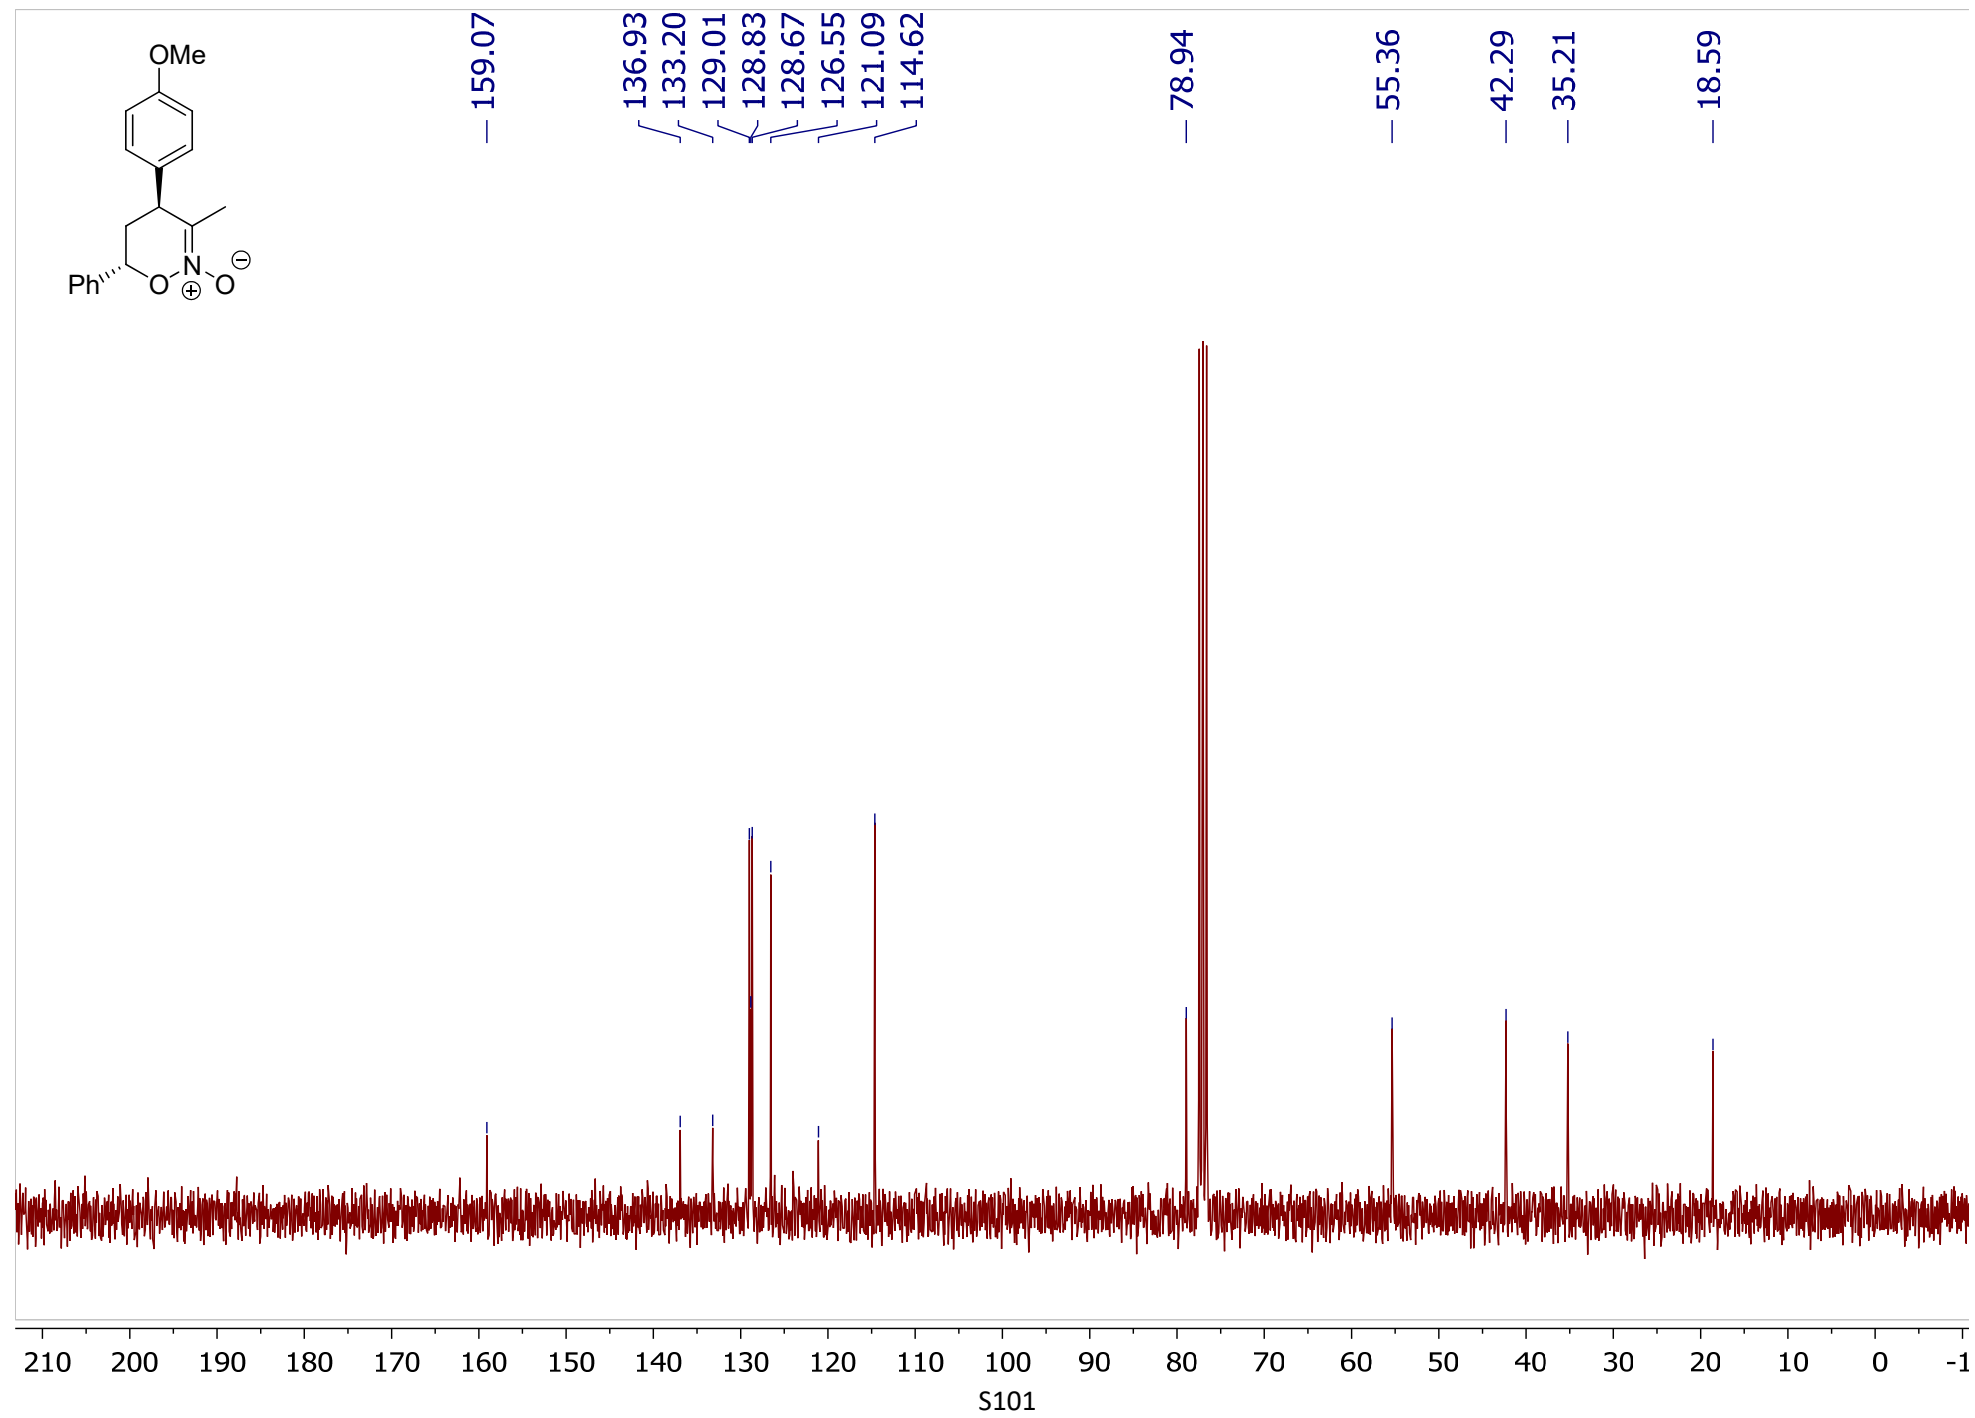

$^{13}\text{C}$  DEPT 135 (75 MHz,  $\text{CDCl}_3$ )

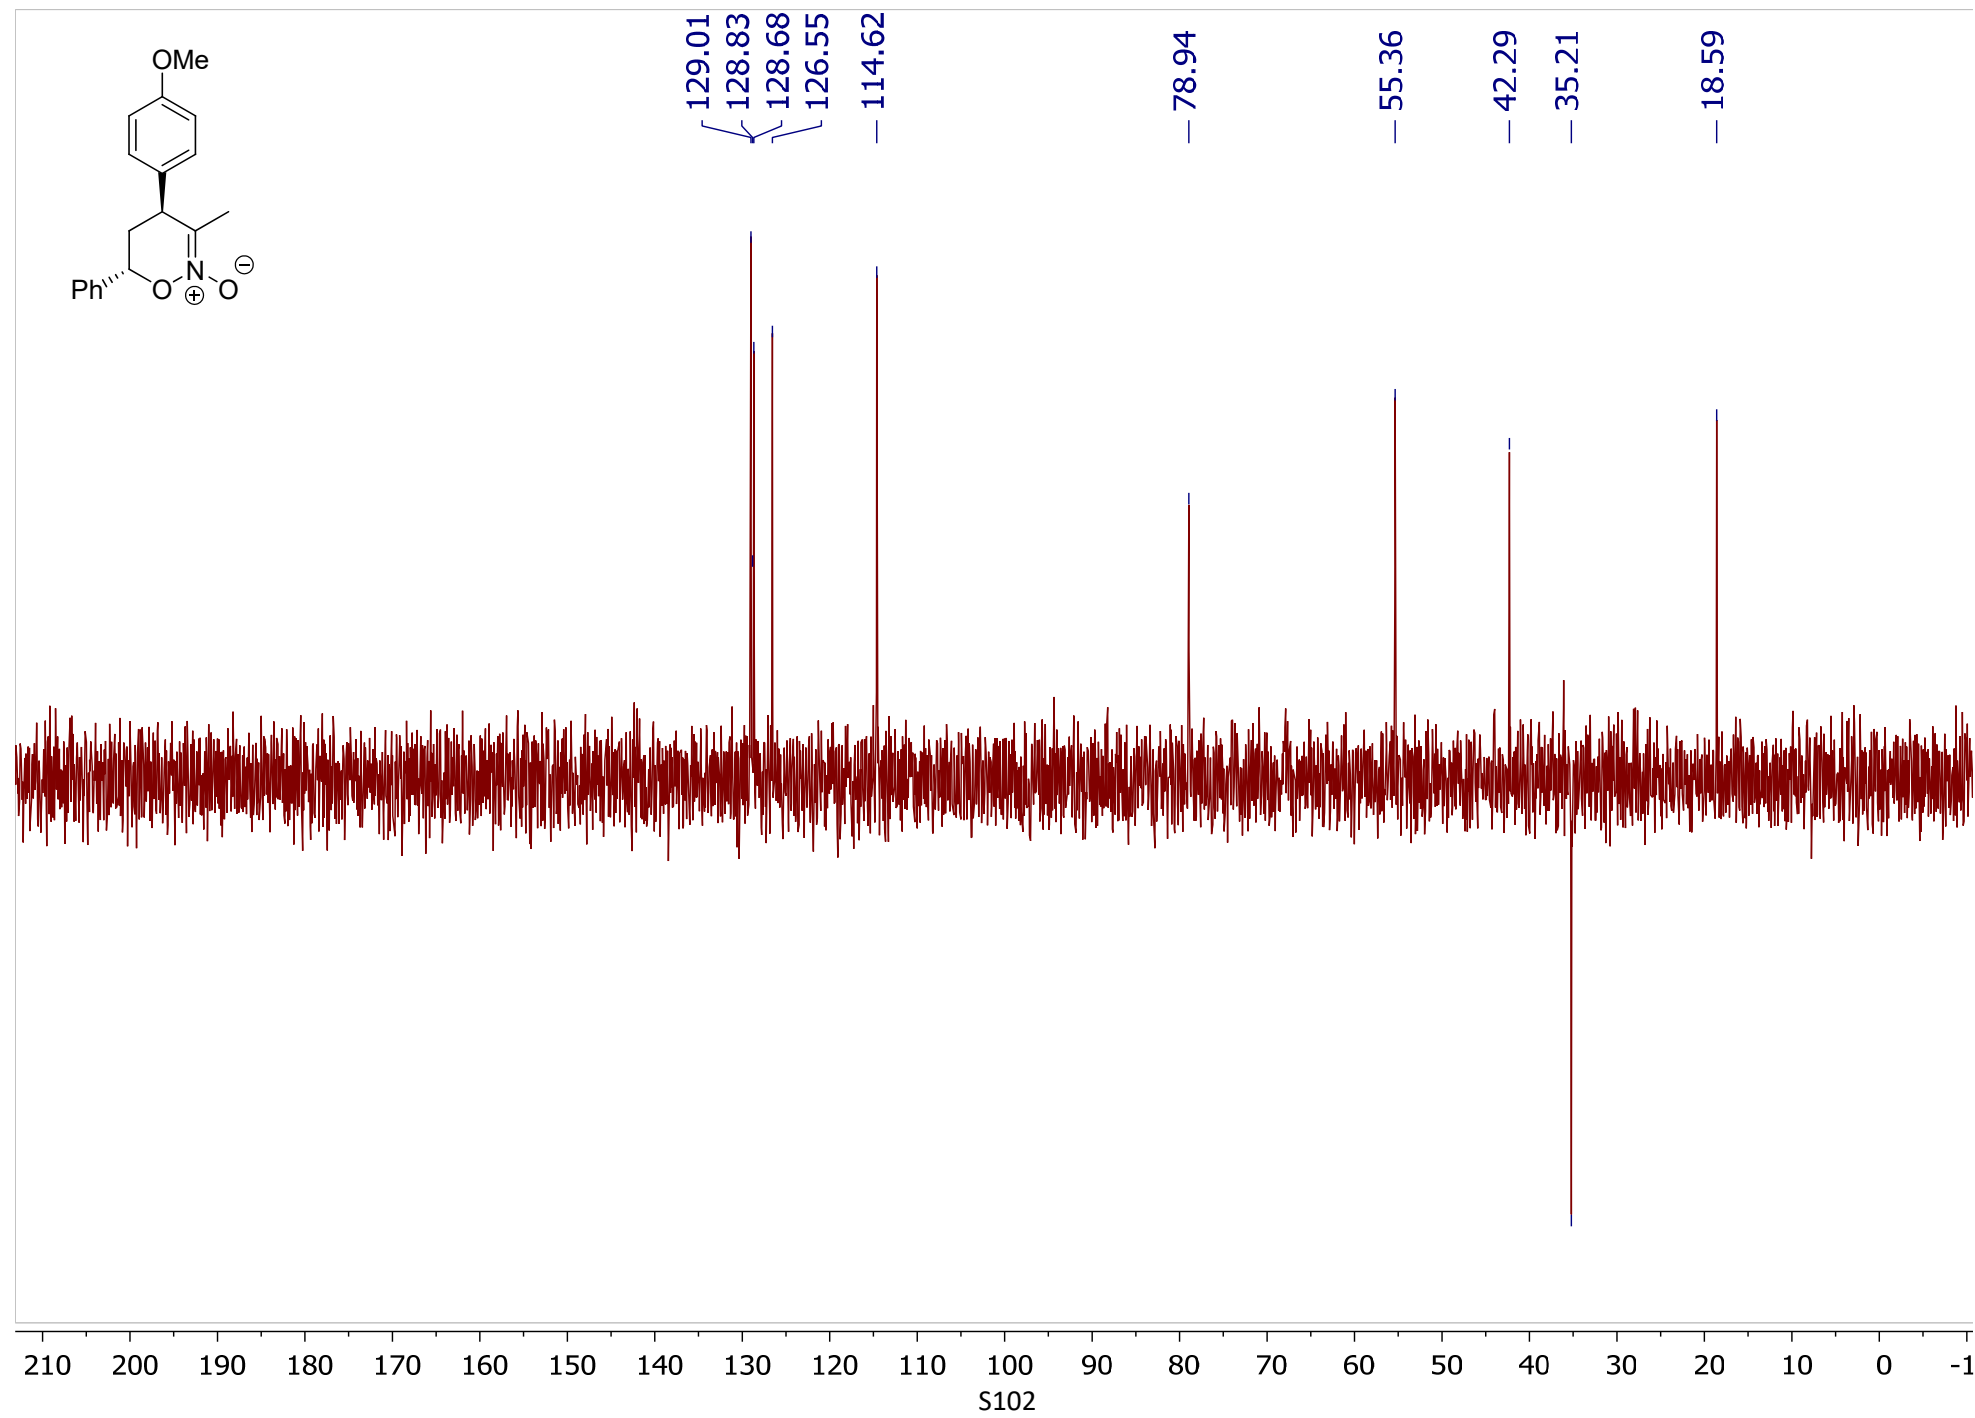

**(4*S*\*,4*aR*\*,8*aR*\*)-4-(4-Methoxyphenyl)-3-methyl-4*a*,5,6,7,8,8*a*-hexahydro-4*H*-benzo[*e*][1,2]oxazine 2-oxide 1l**

<sup>1</sup>H NMR (300 MHz, CDCl<sub>3</sub>)

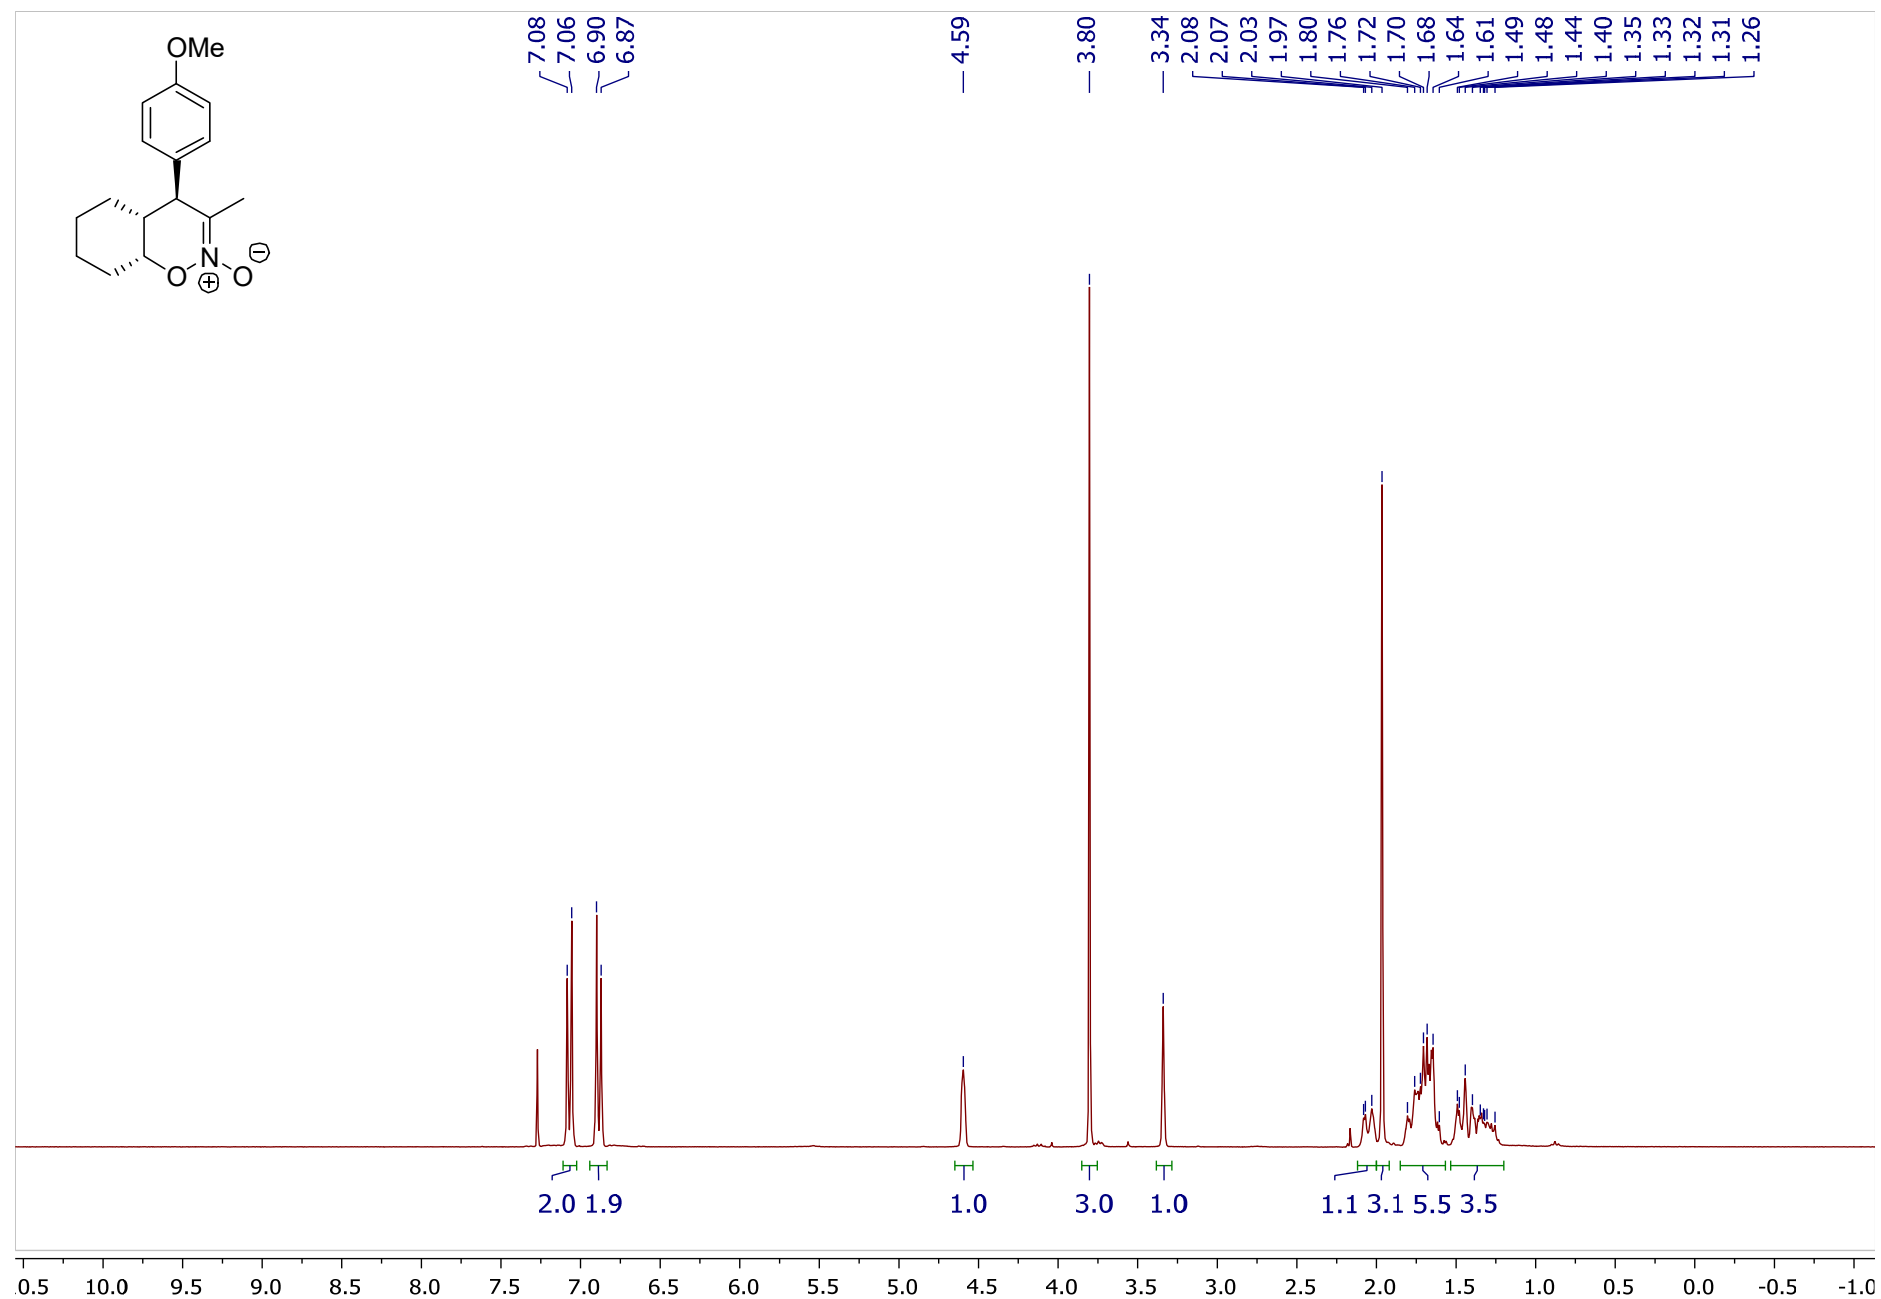

$^{13}\text{C}$  NMR (75 MHz,  $\text{CDCl}_3$ )

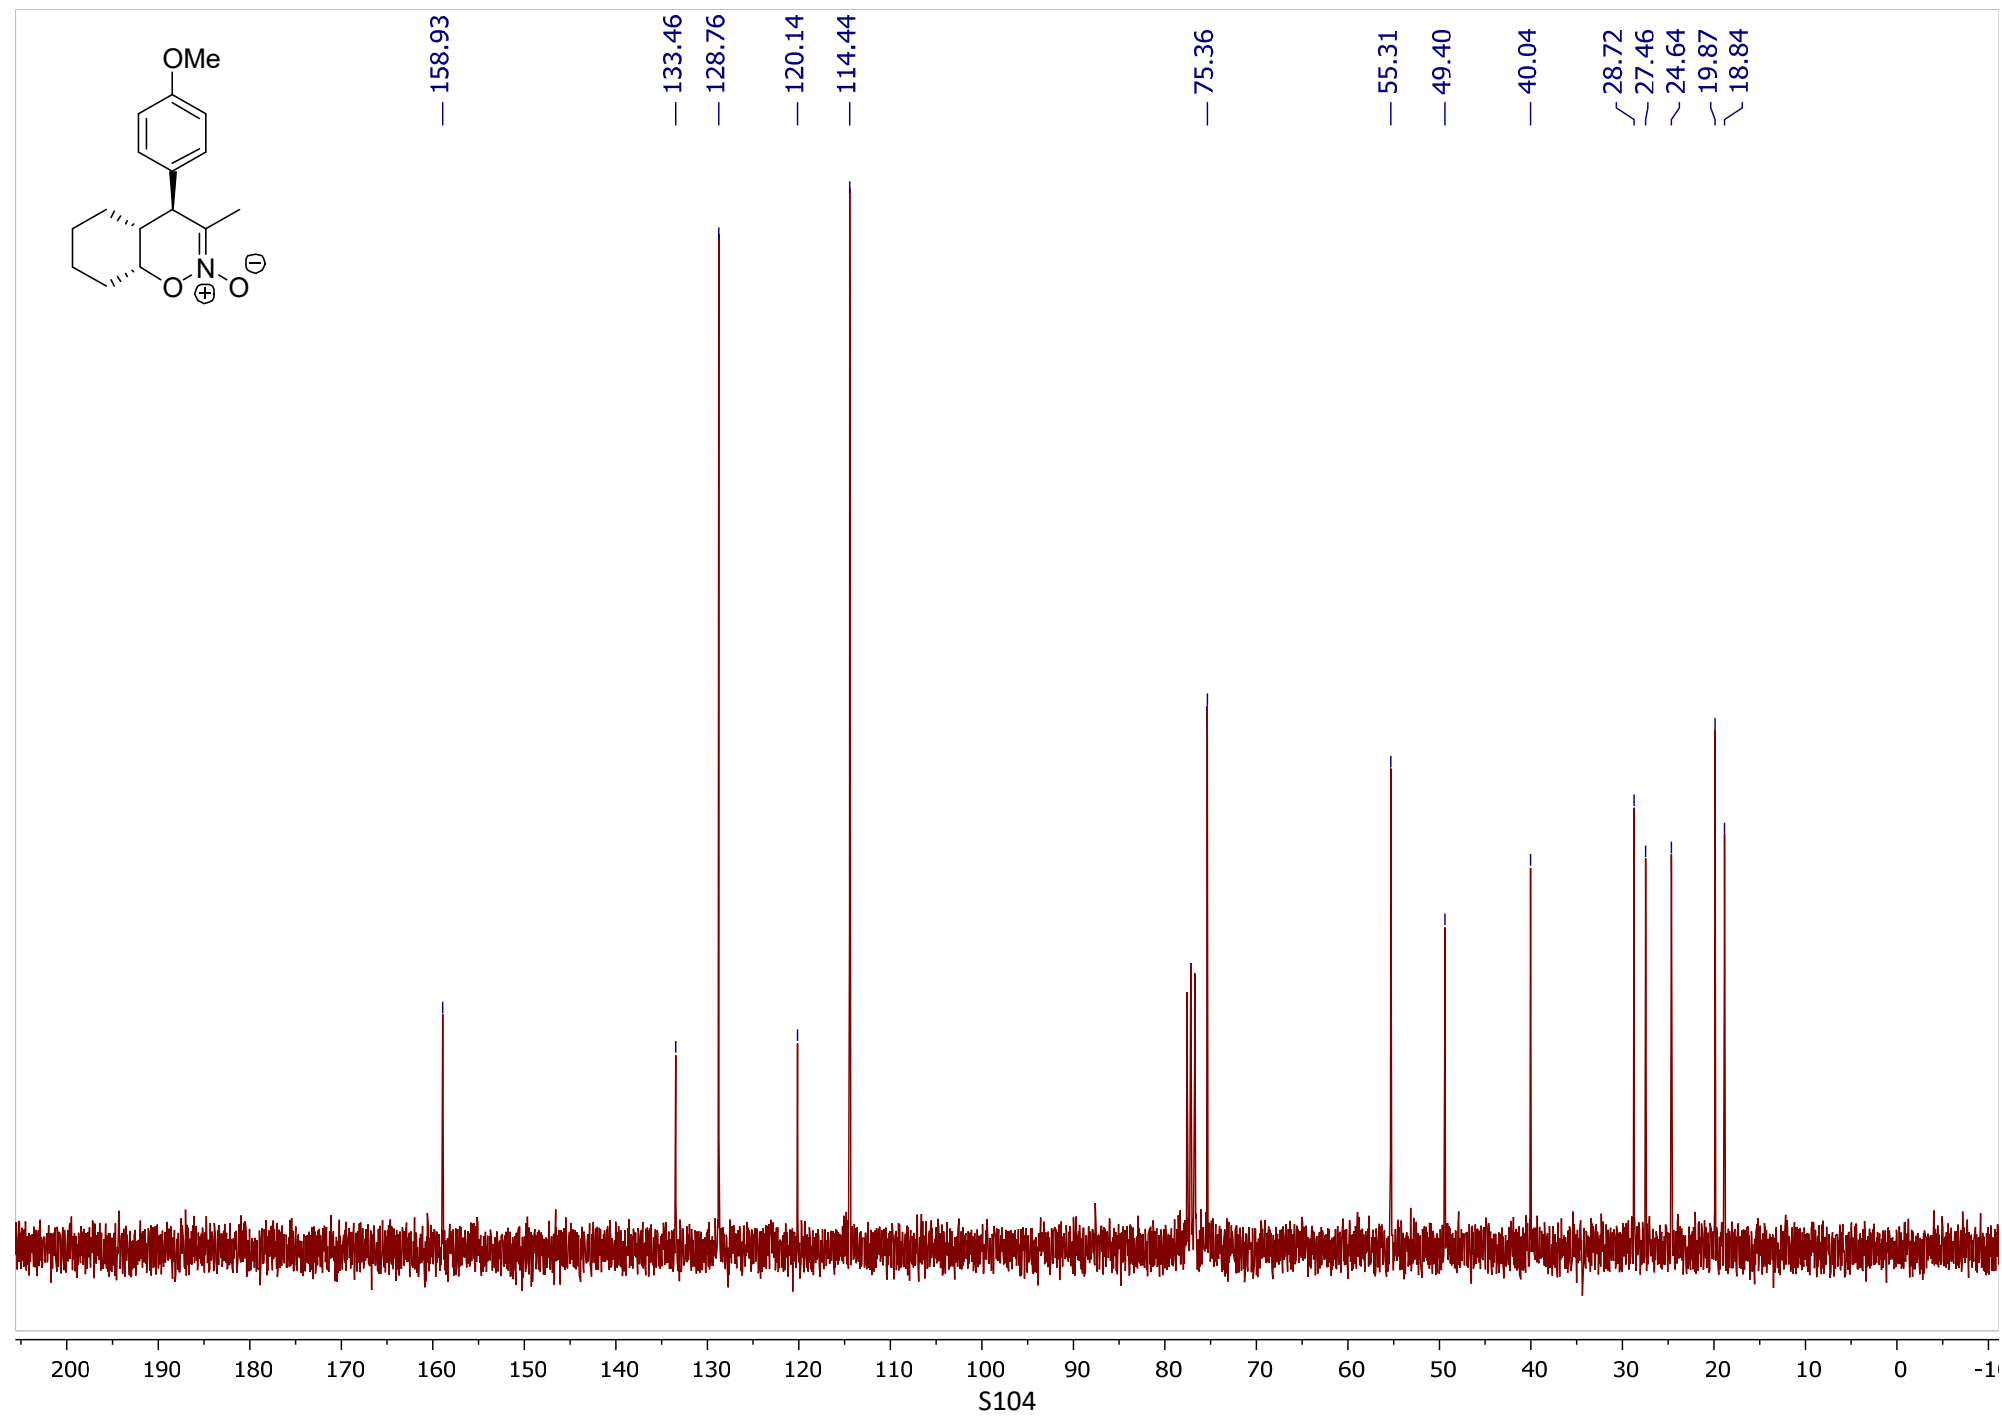



$^{13}\text{C}$  DEPT 135 (75 MHz,  $\text{CDCl}_3$ )

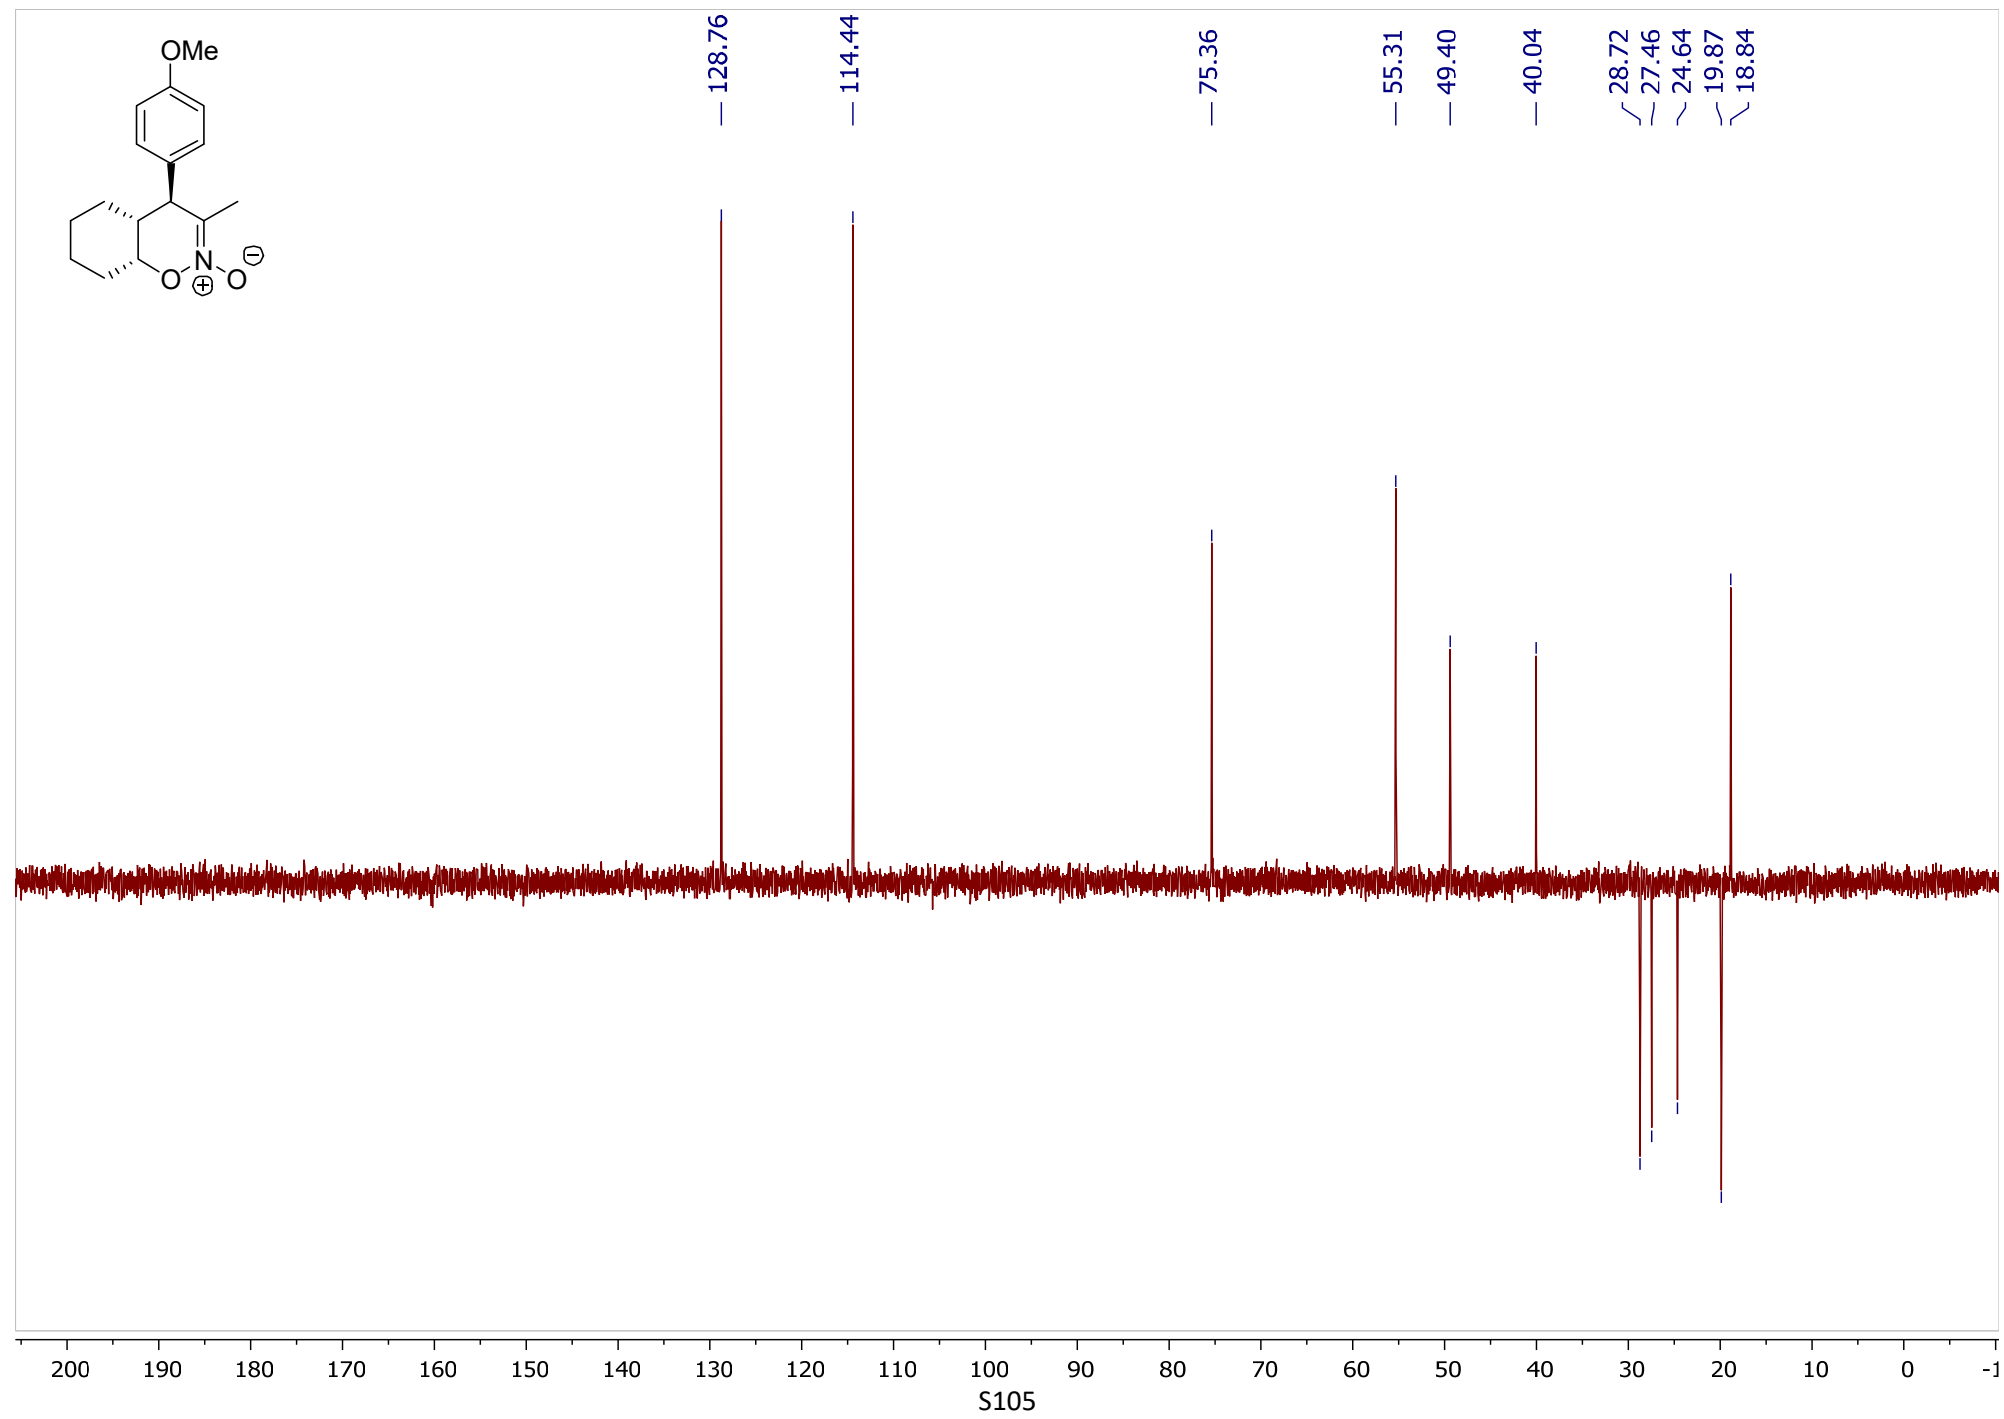

5,5-Bis(ethoxycarbonyl)-4-(4-methoxyphenyl)-3-methyl-4,5-dihydroisoxazole 2-oxide 2a

$^1\text{H}$  NMR (300 MHz,  $\text{CDCl}_3$ )

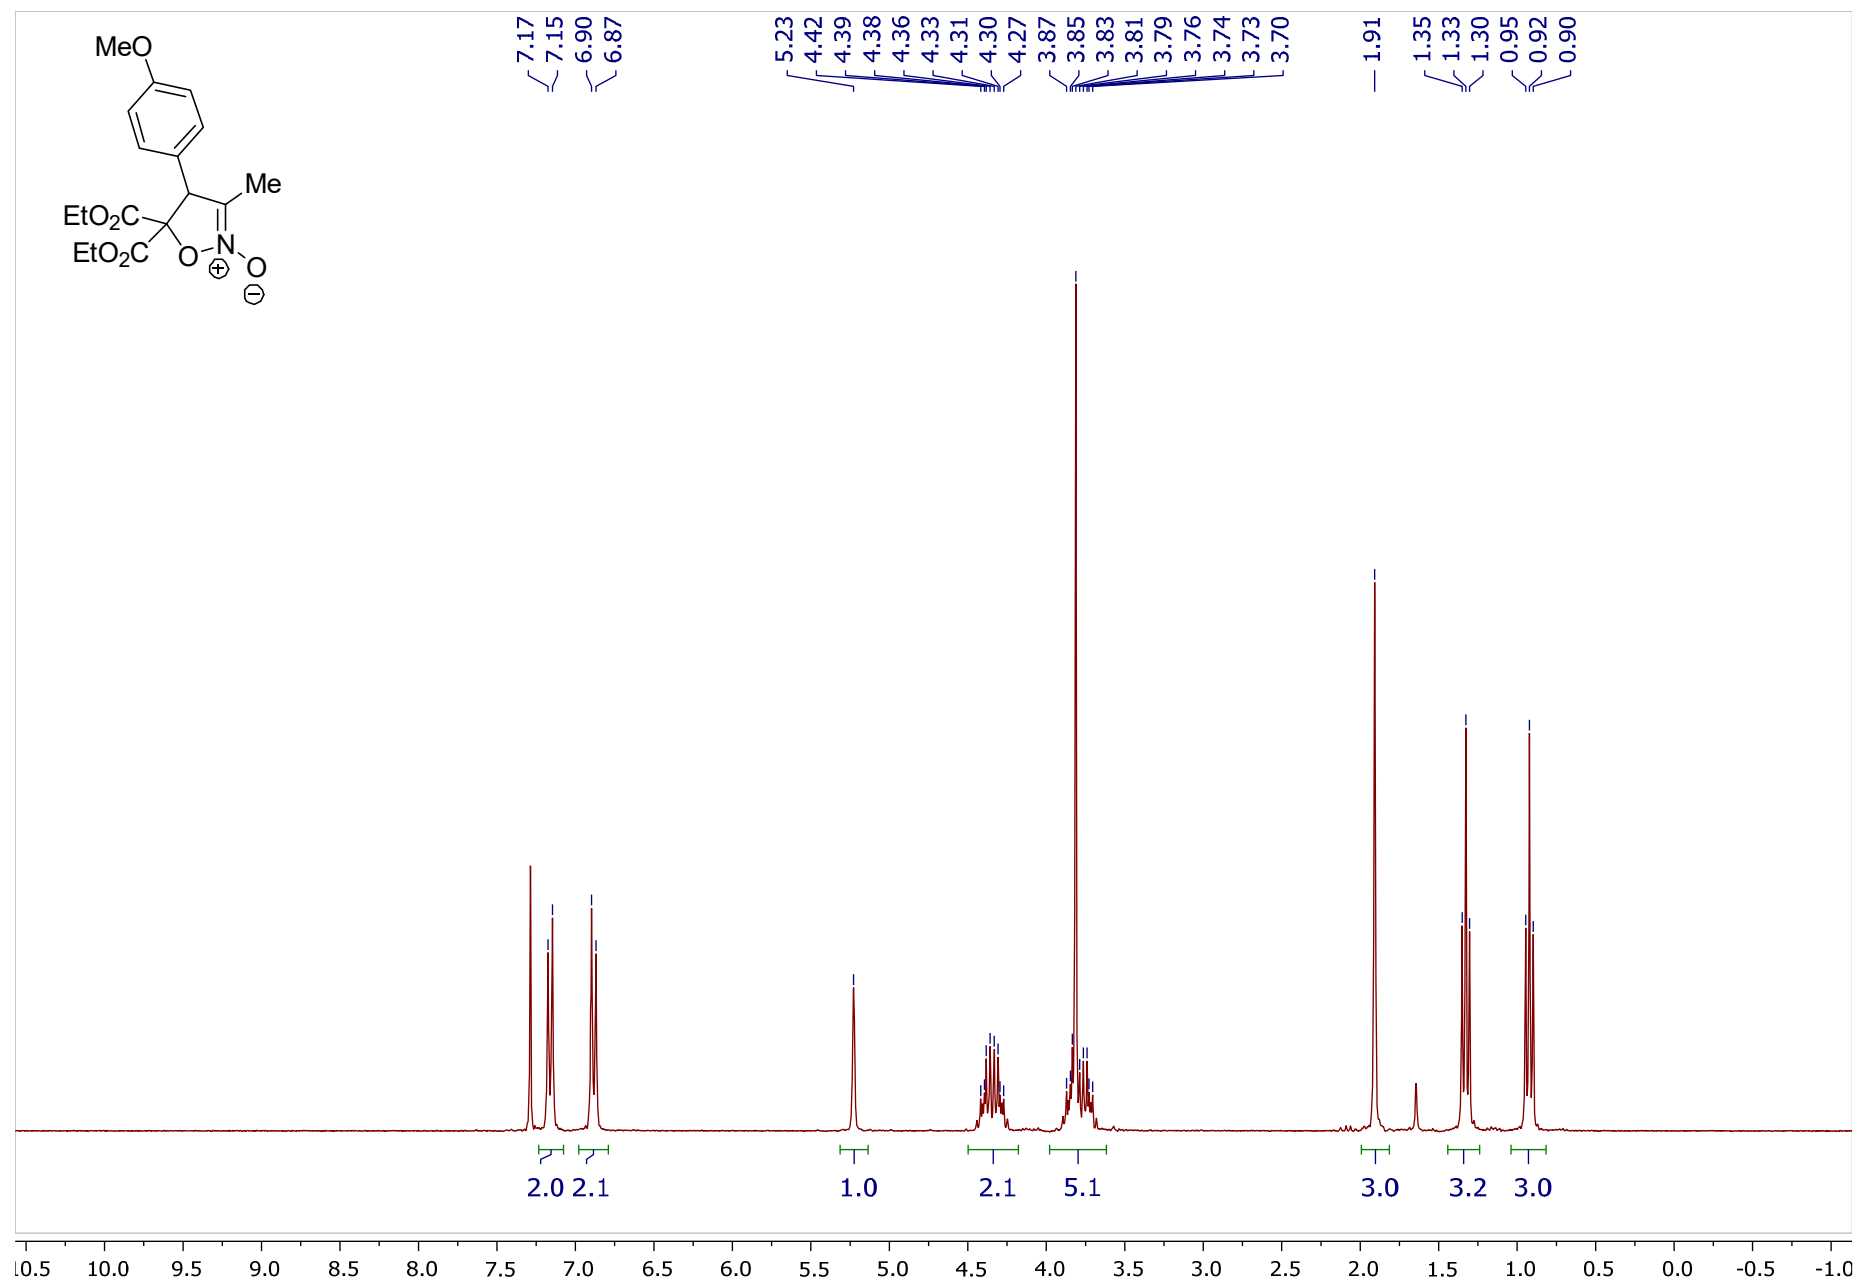

$^{13}\text{C}$  NMR (75 MHz,  $\text{CDCl}_3$ )

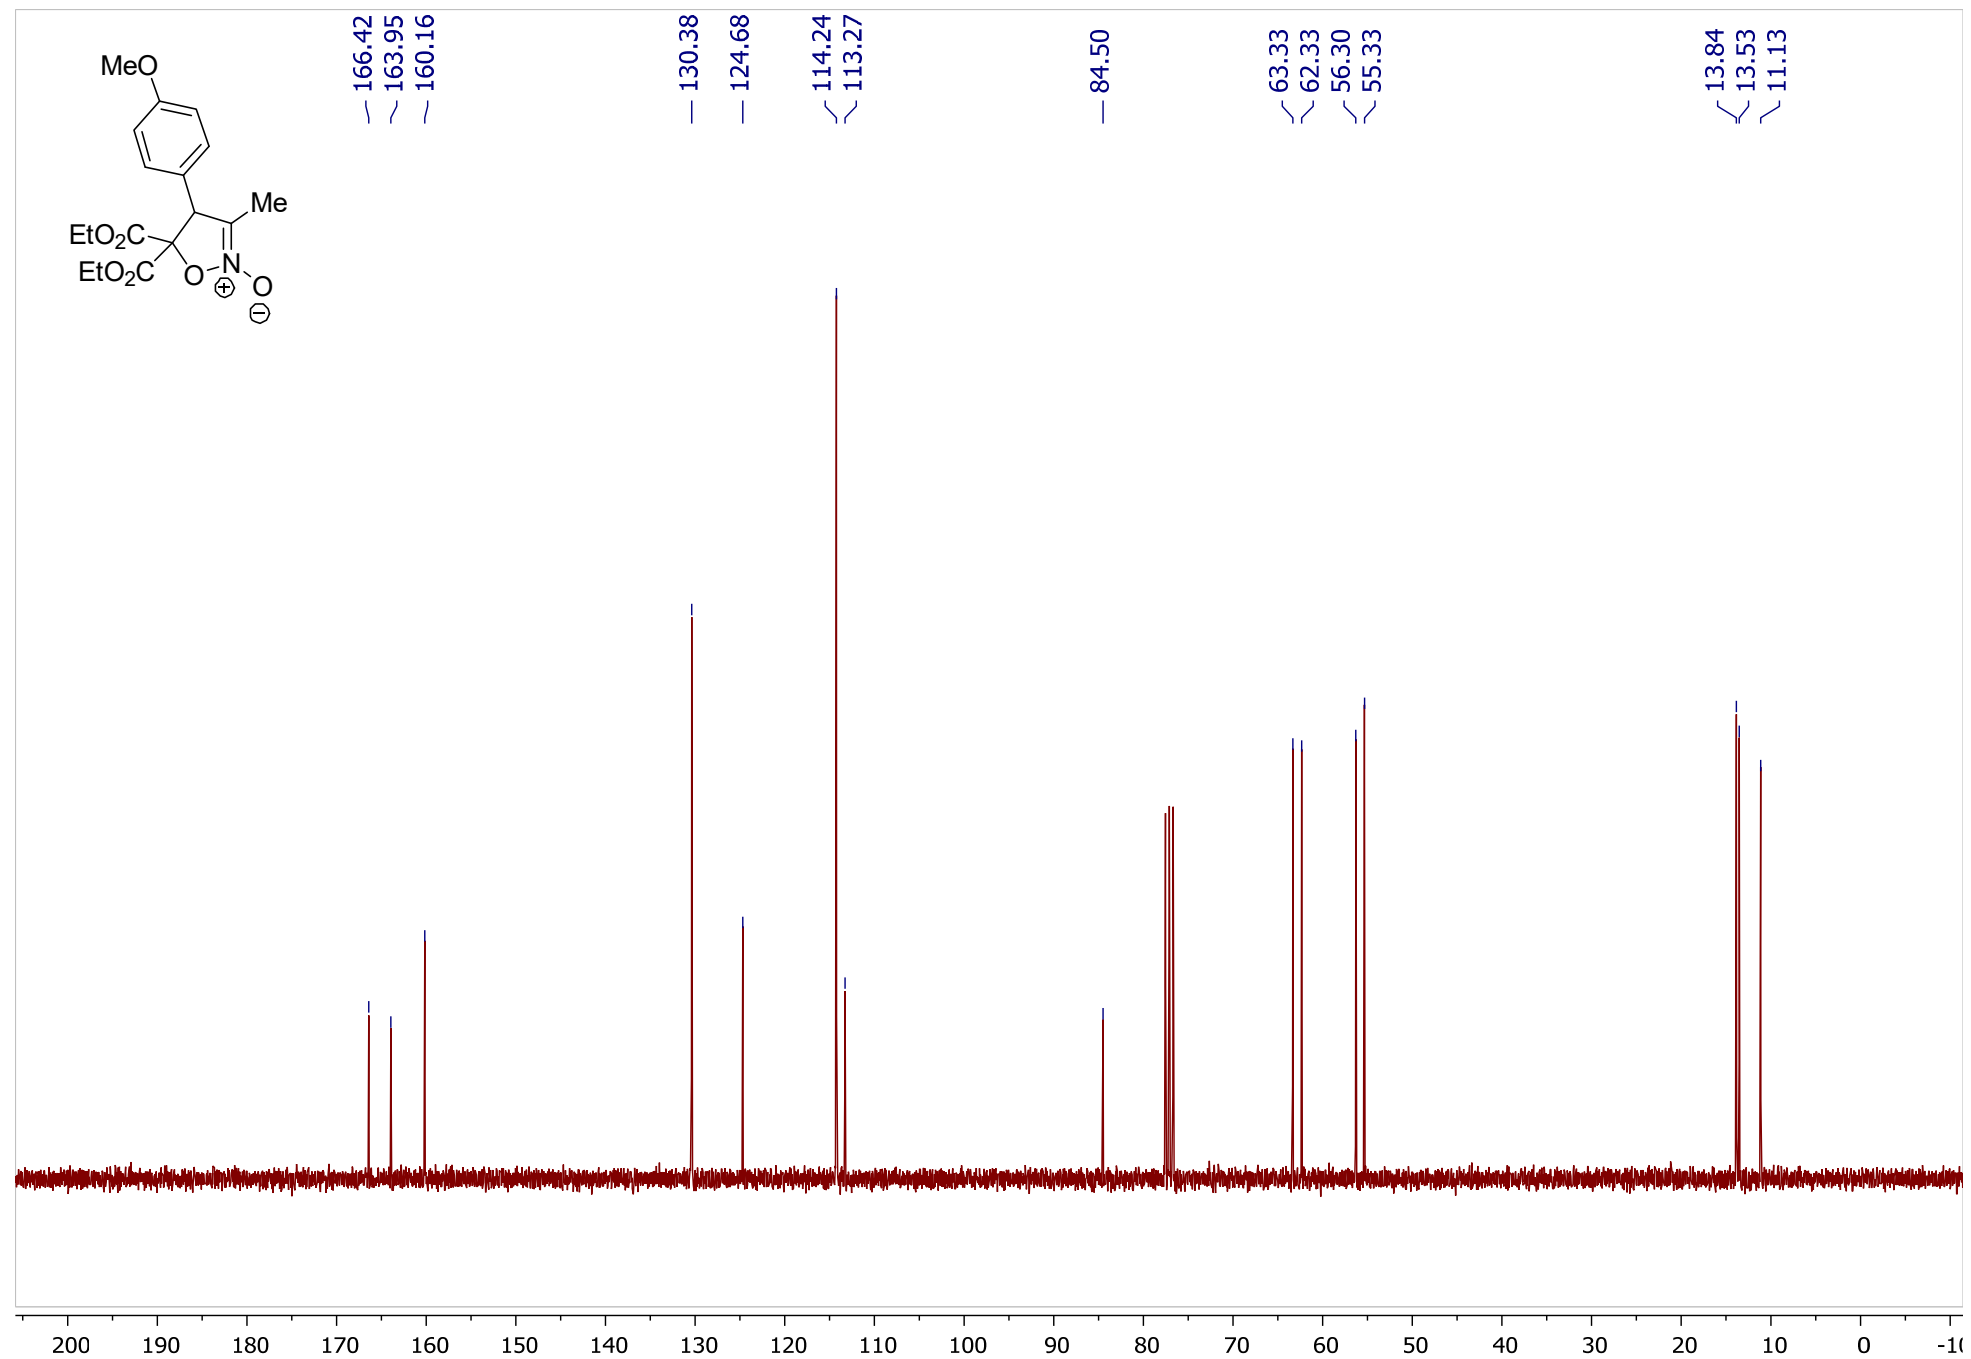

$^{13}\text{C}$  DEPT 135 (75 MHz,  $\text{CDCl}_3$ )

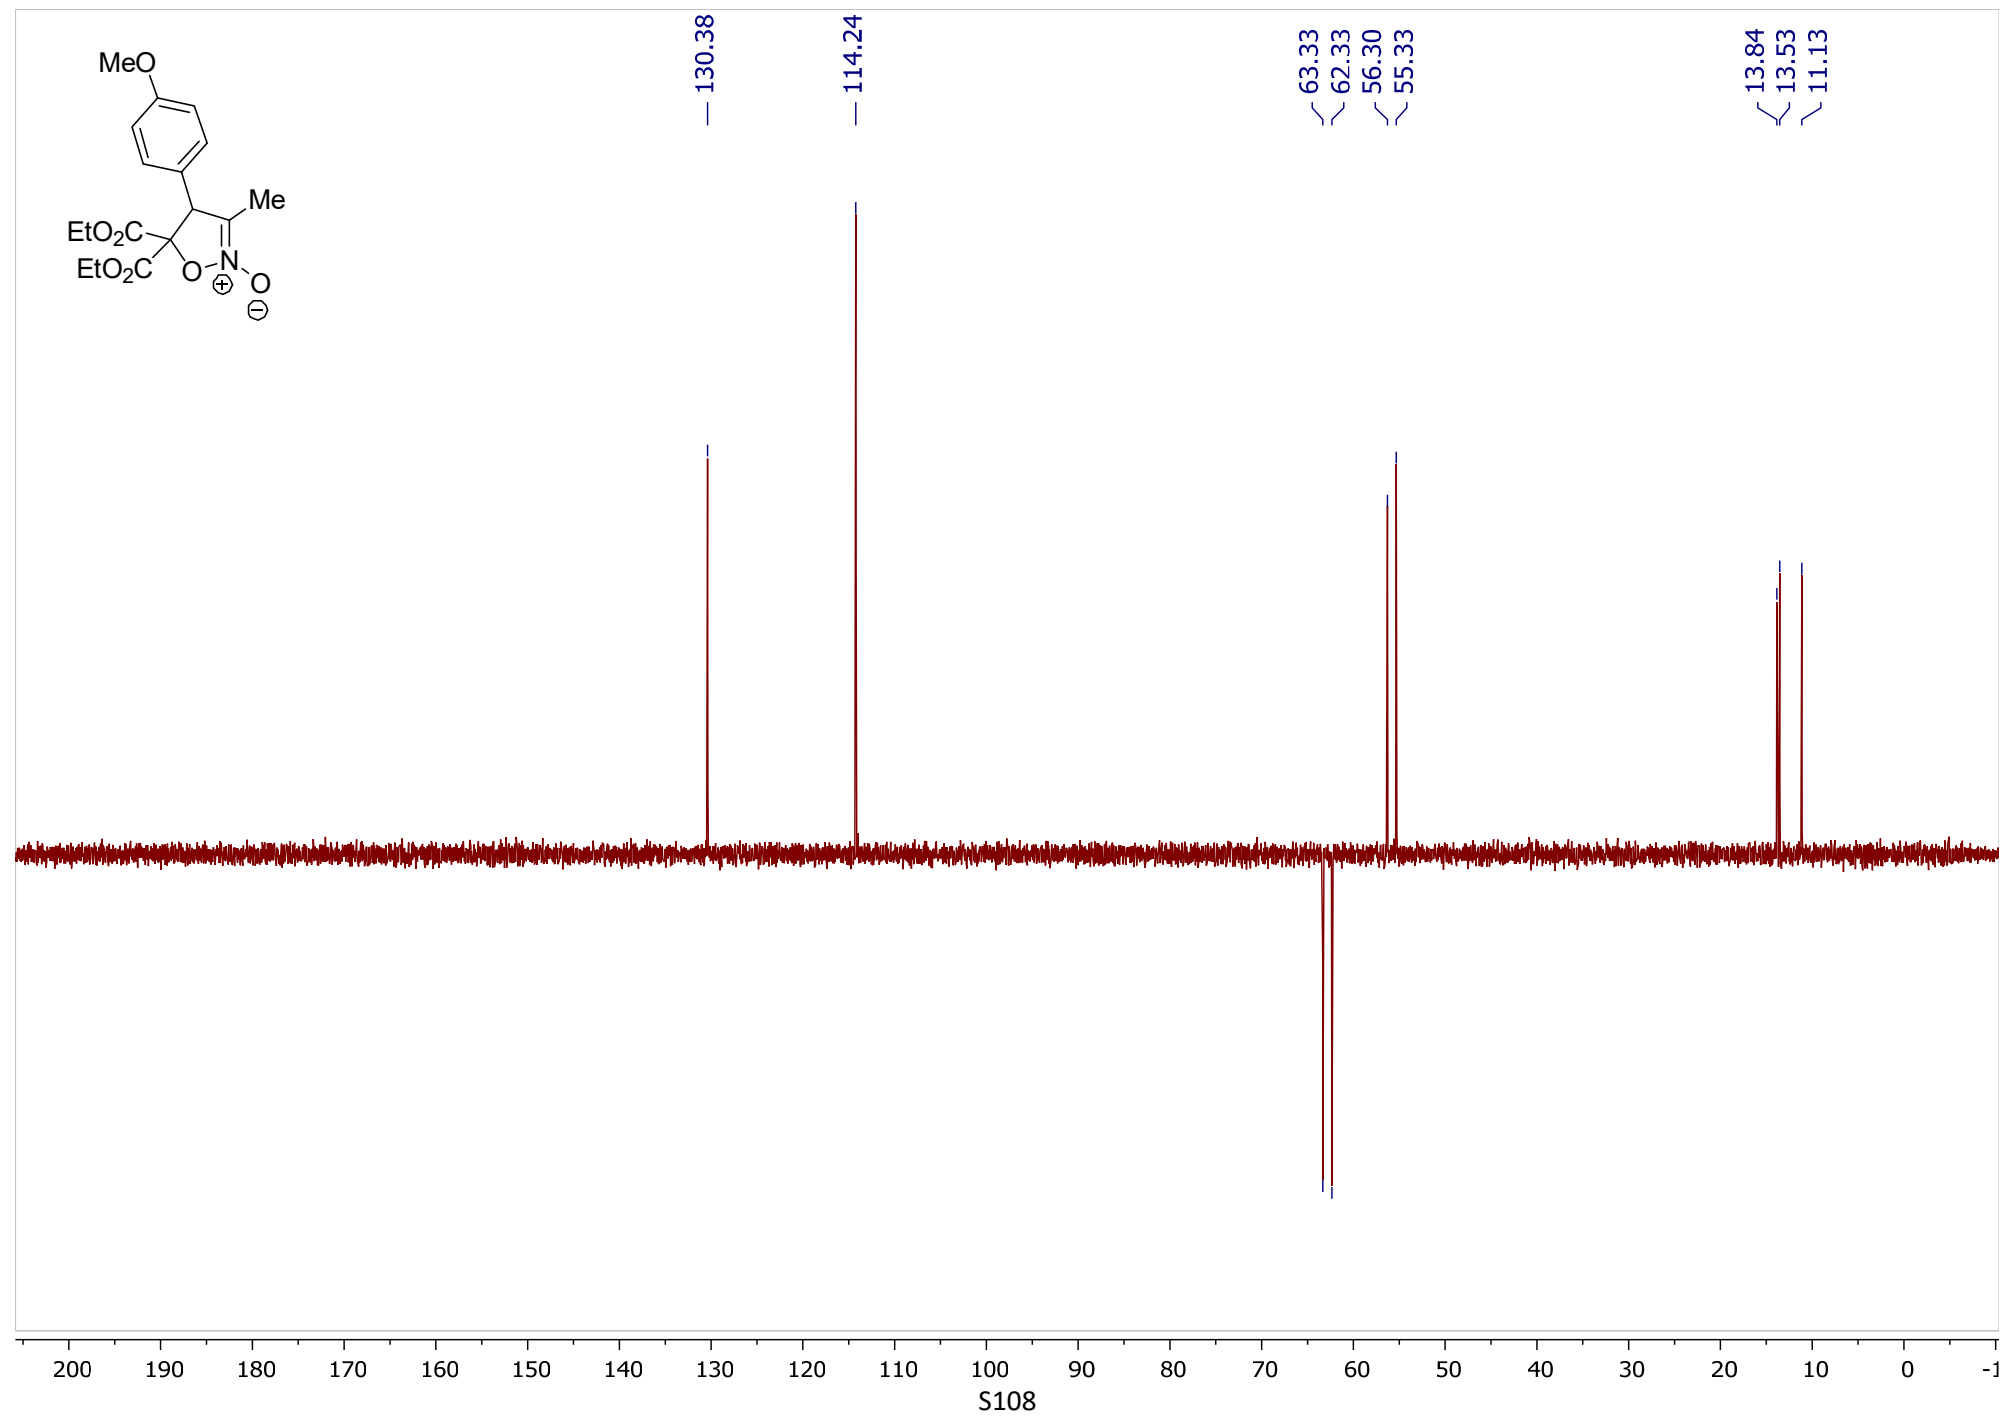

5,5-Bis(ethoxycarbonyl)-4-(4-methoxyphenyl)-3-phenyl-4,5-dihydroisoxazole 2-oxide 2c

$^1\text{H}$  NMR (300 MHz,  $\text{CDCl}_3$ )

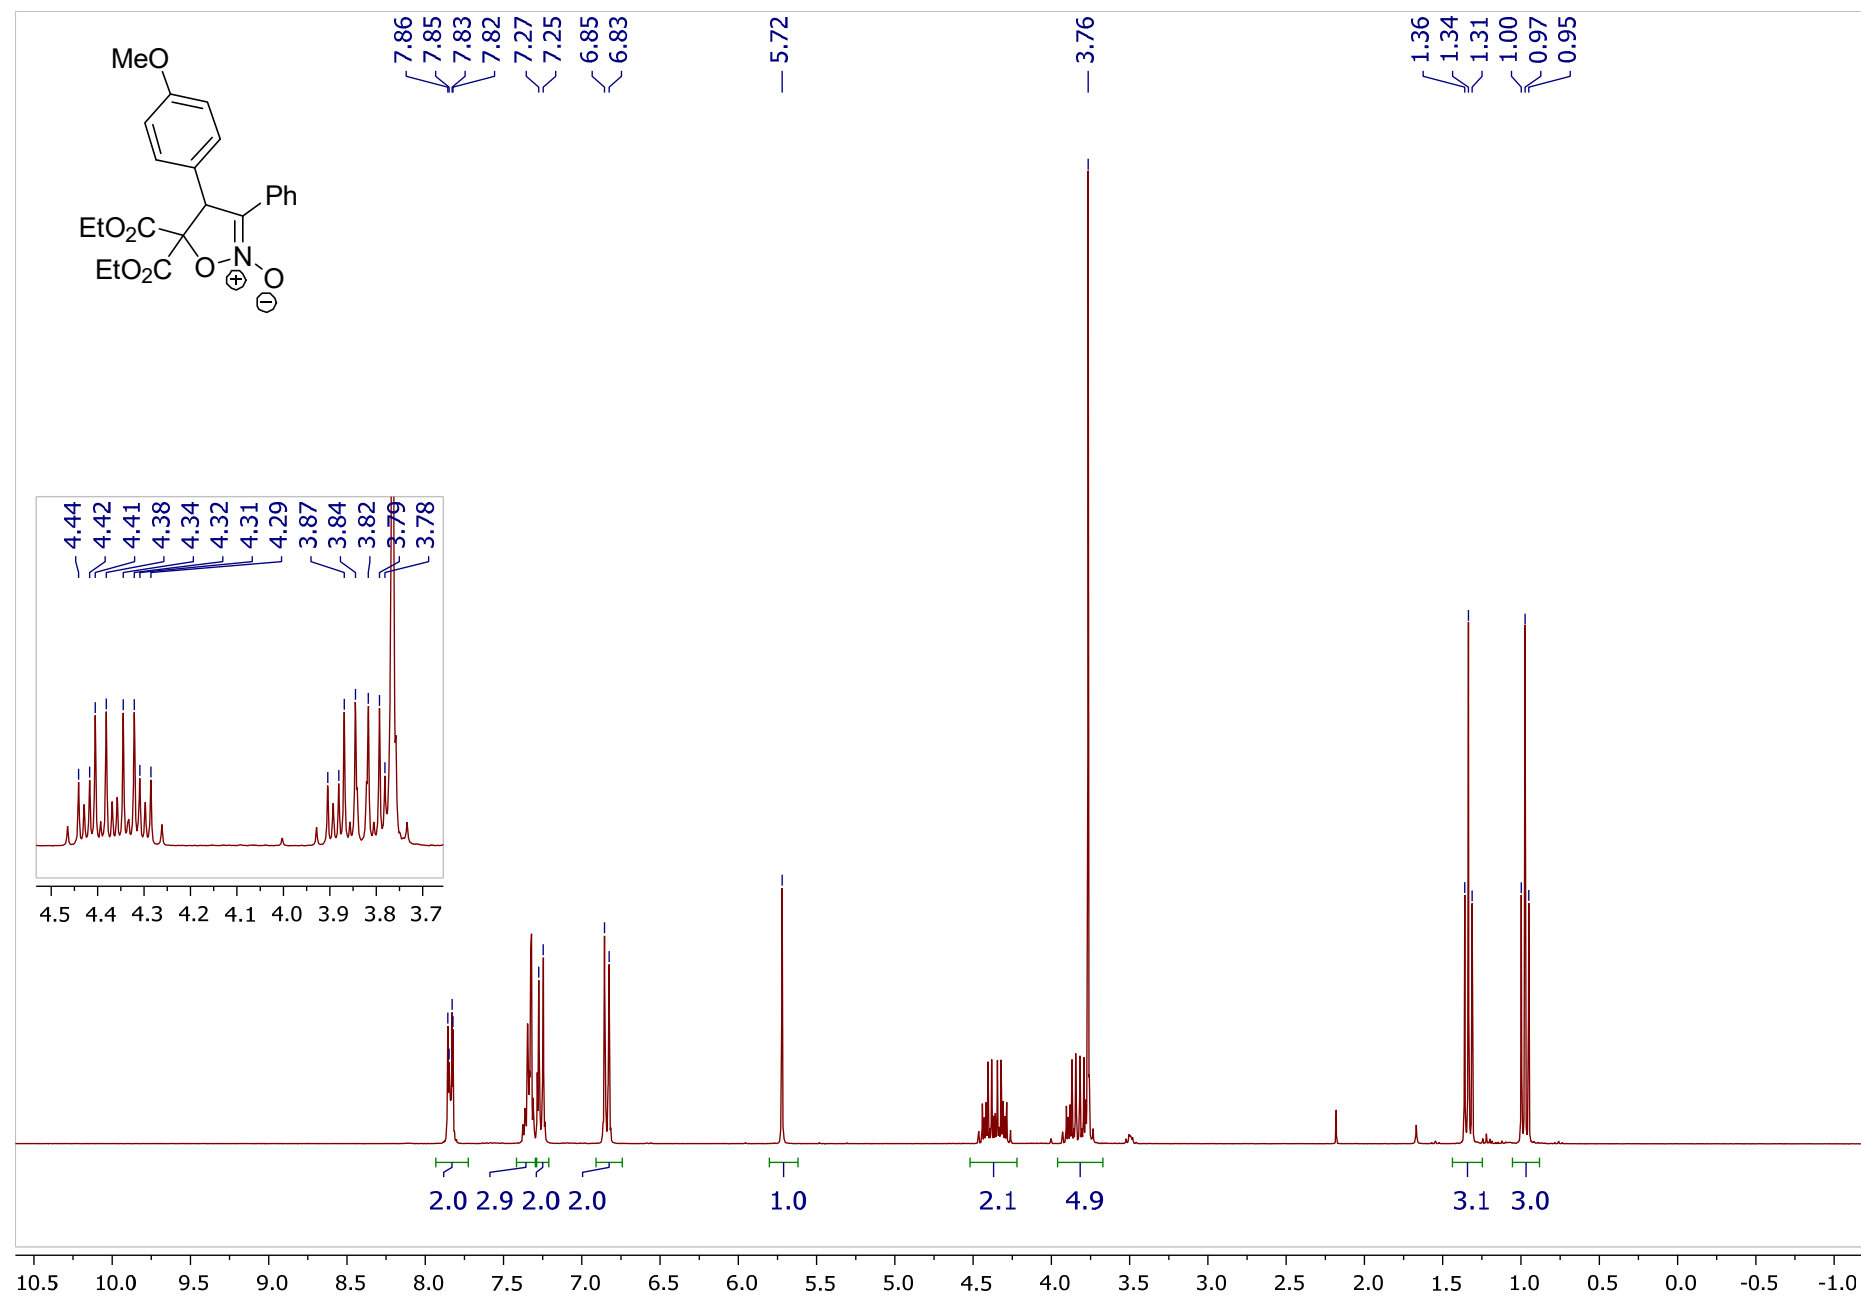

$^{13}\text{C}$  NMR (75 MHz,  $\text{CDCl}_3$ )

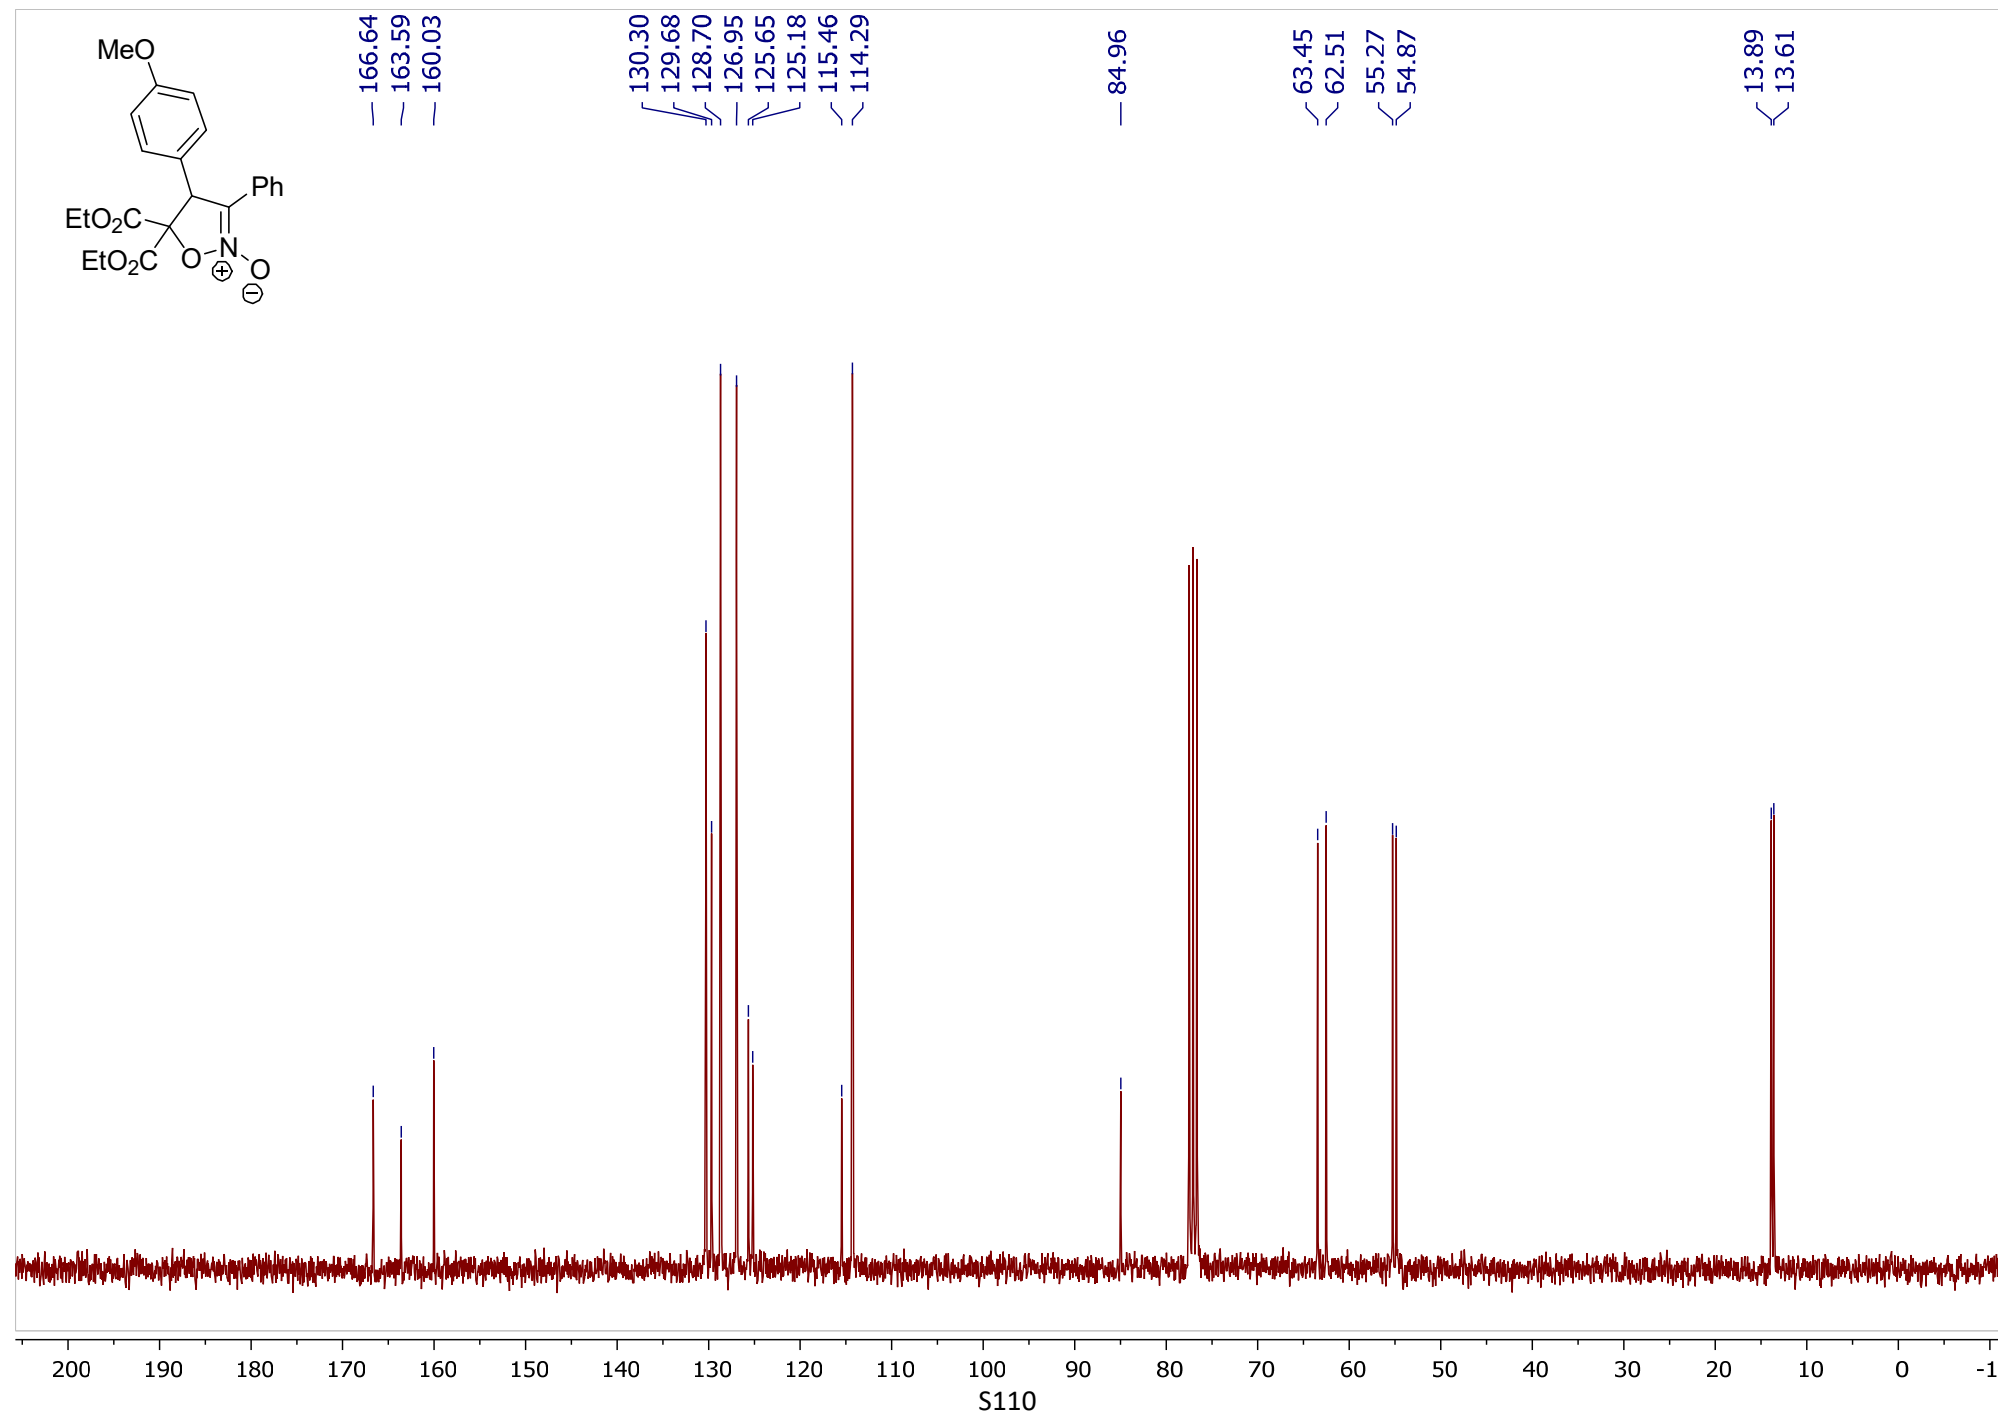

# 3-Chloro-5,5-bis(ethoxycarbonyl)-4-(4-methoxyphenyl)-4,5-dihydroisoxazole 2-oxide 2d

$^1\text{H}$  NMR (300 MHz,  $\text{CDCl}_3$ )

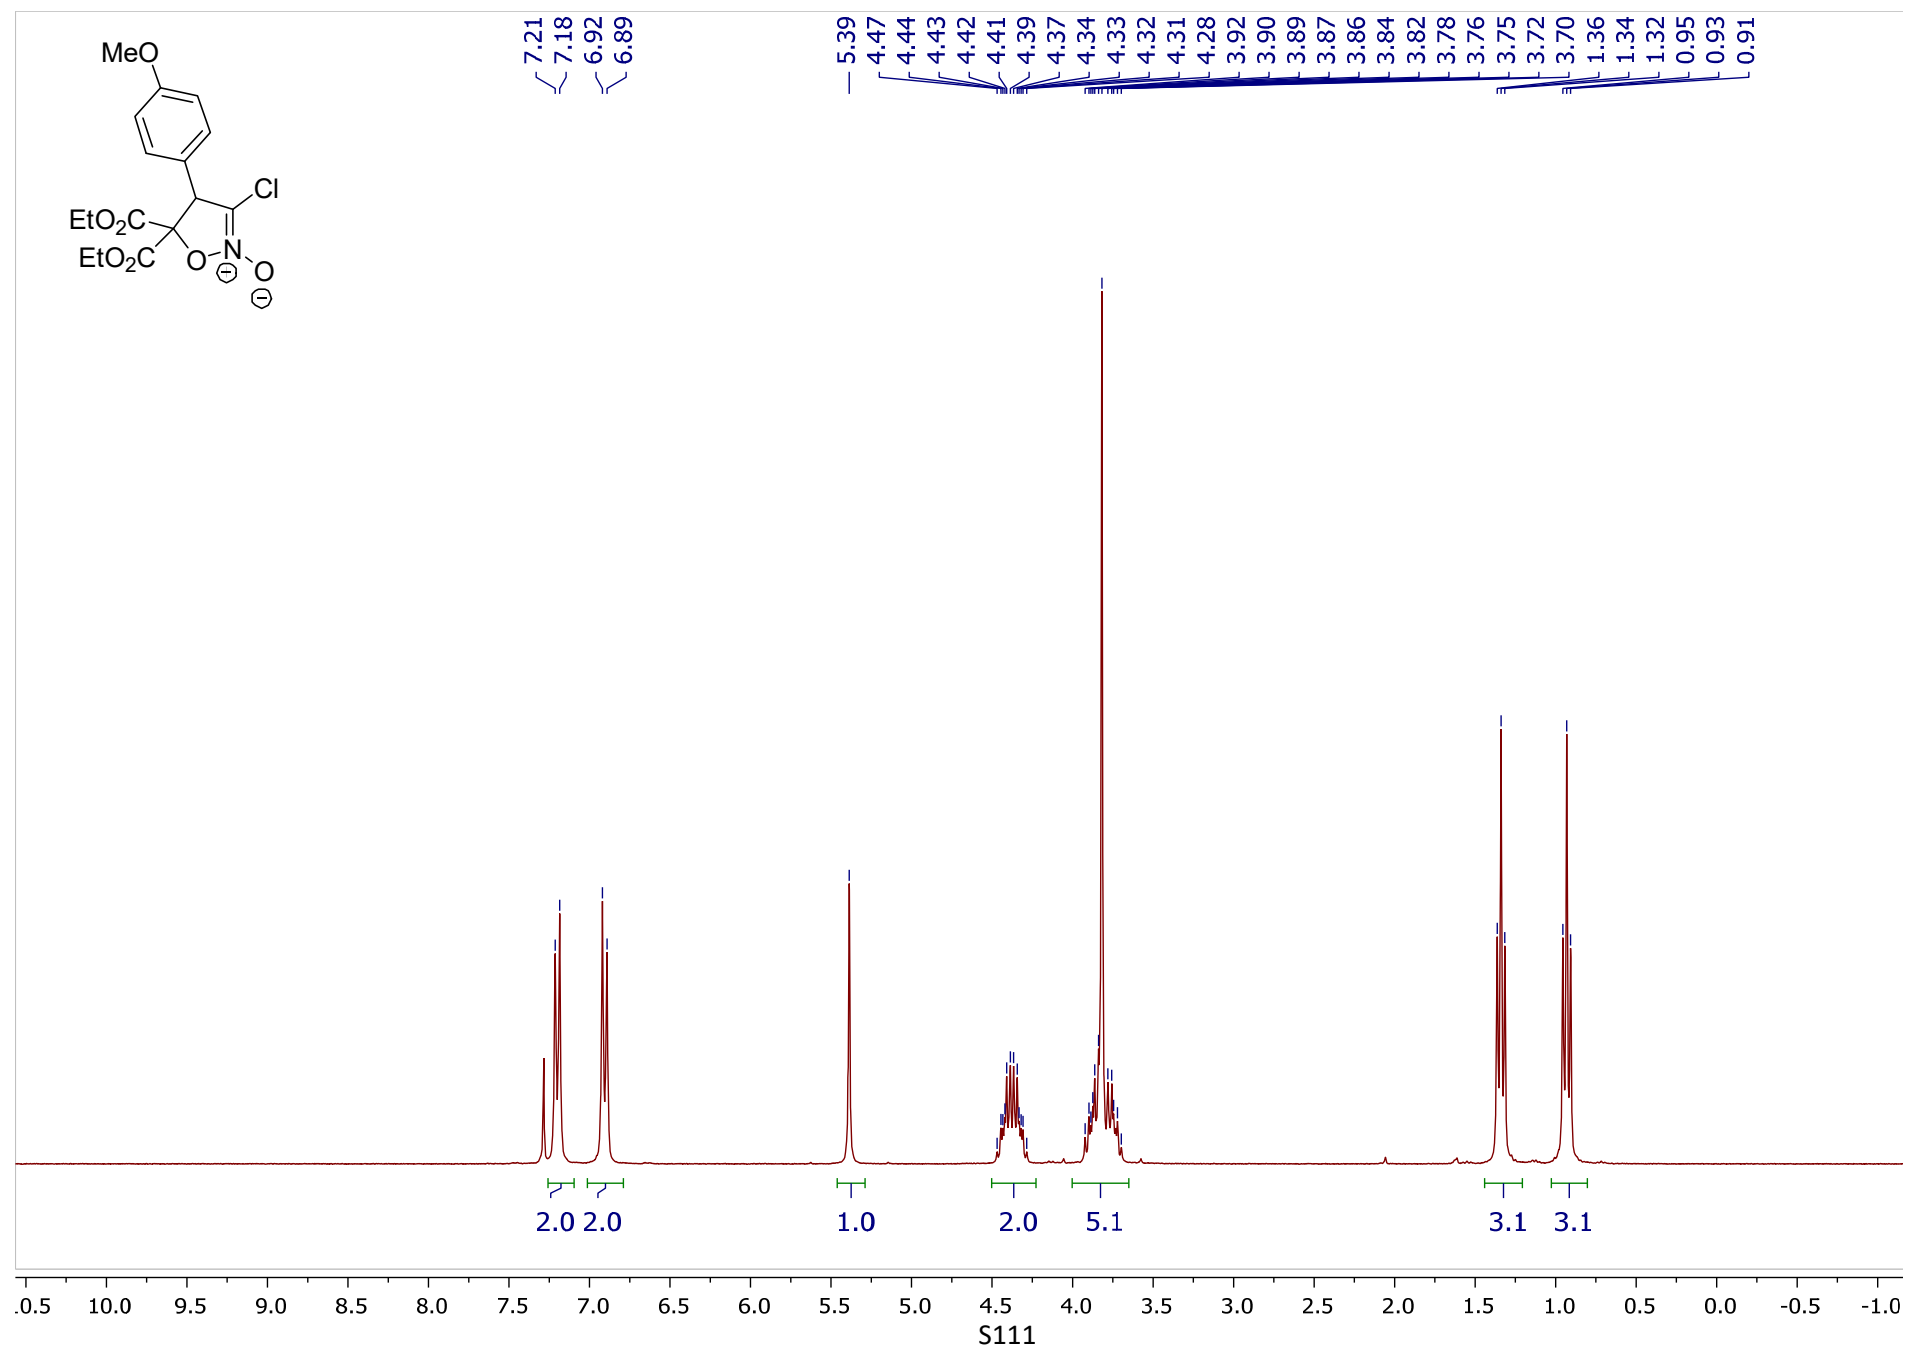

<sup>13</sup>C NMR (75 MHz, CDCl<sub>3</sub>)

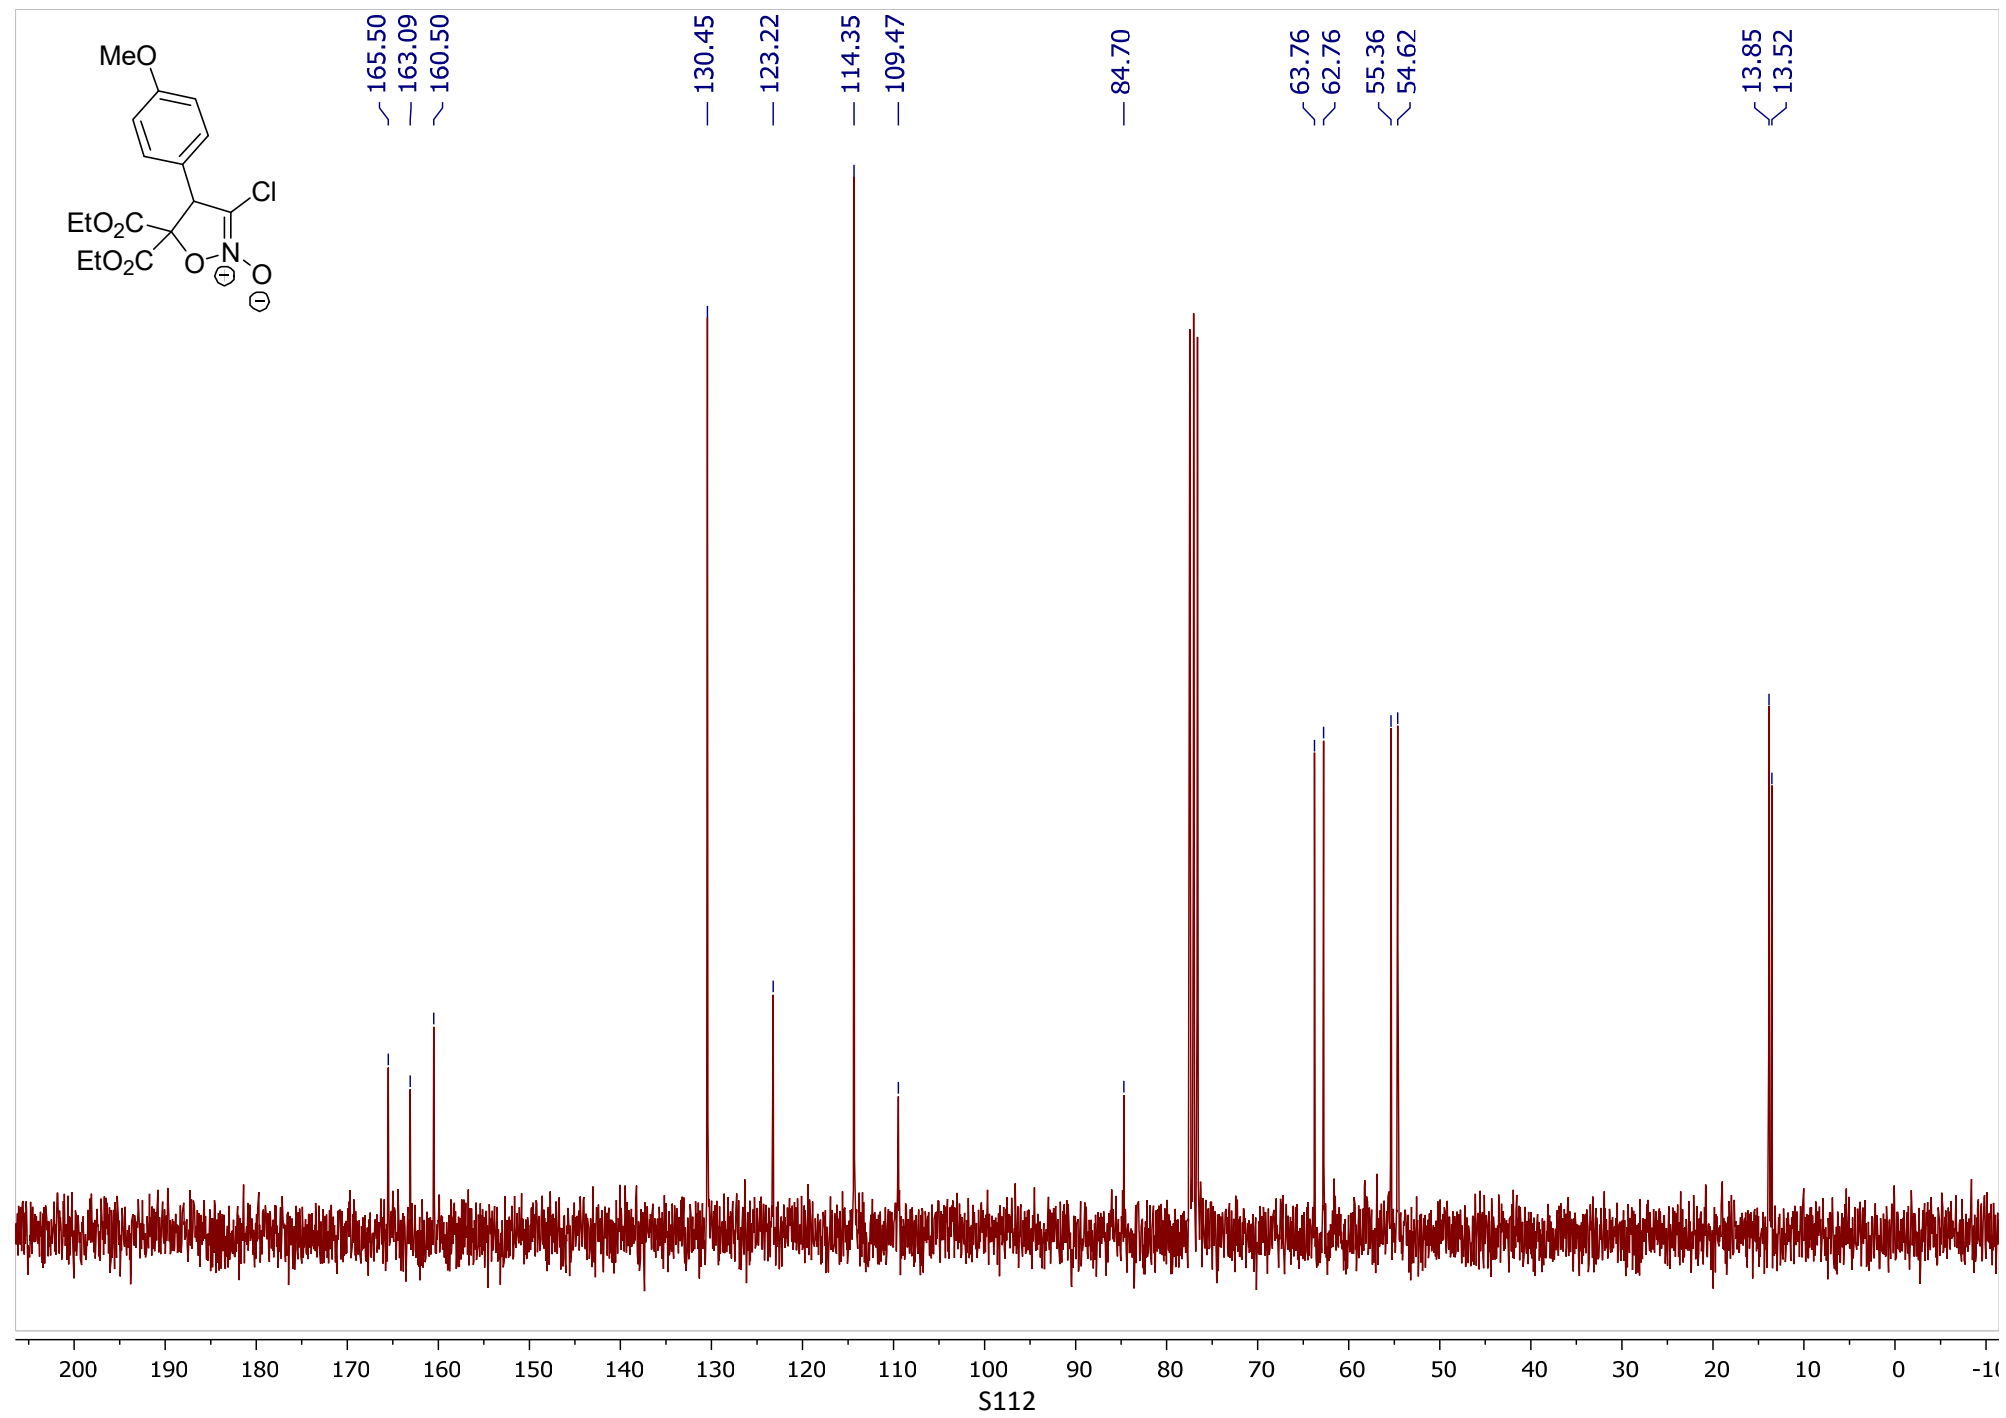



$^{13}\text{C}$  DEPT 135 (75 MHz,  $\text{CDCl}_3$ )

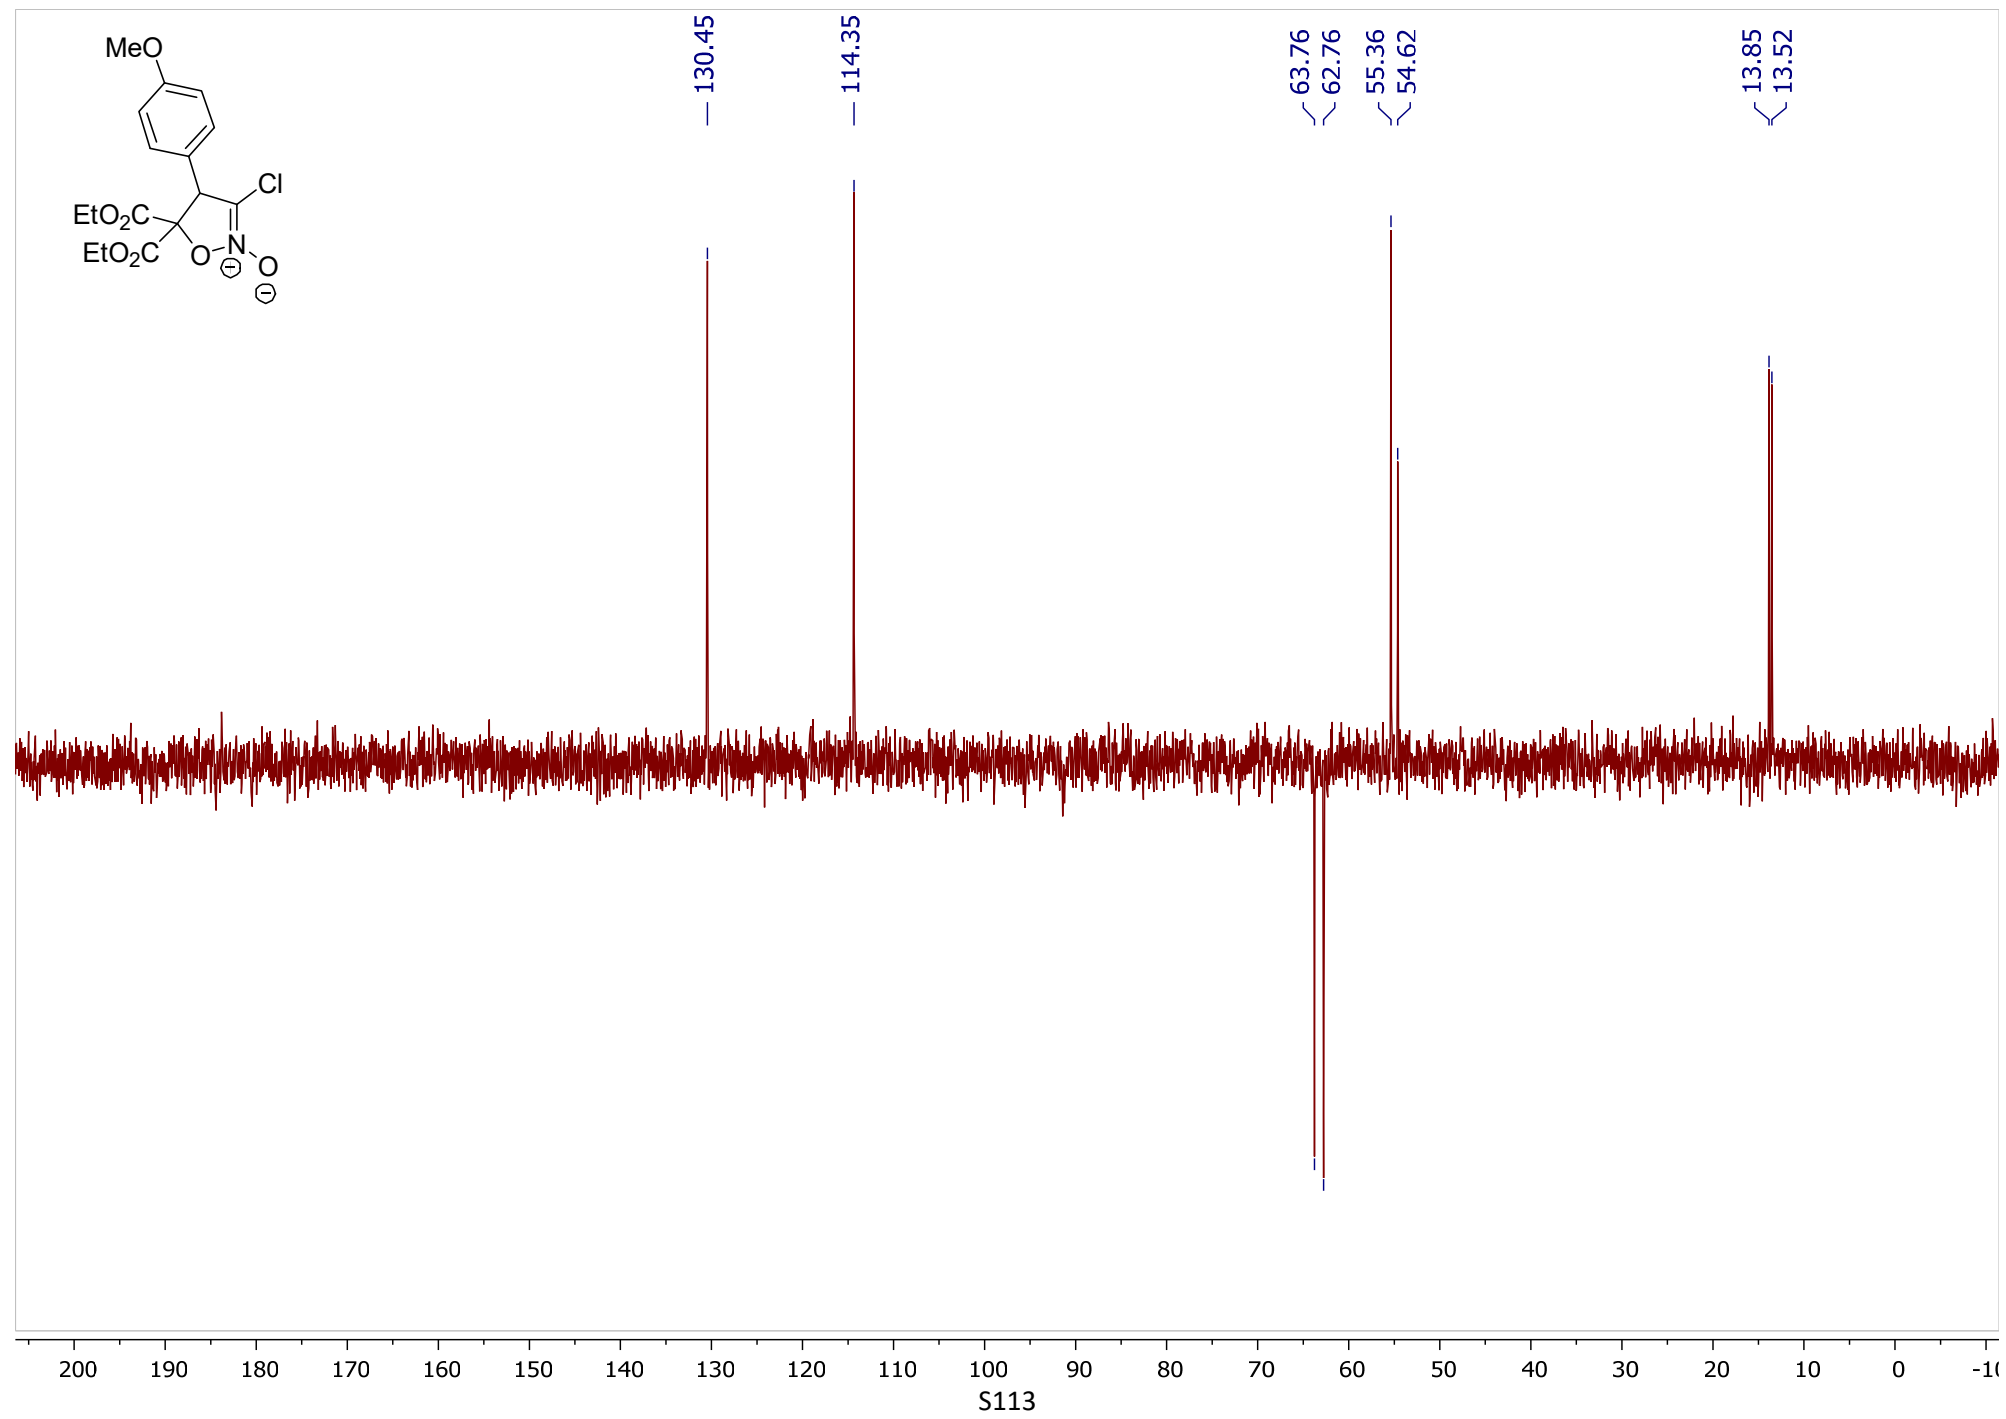

$^1\text{H}$ - $^{13}\text{C}$  HMBC

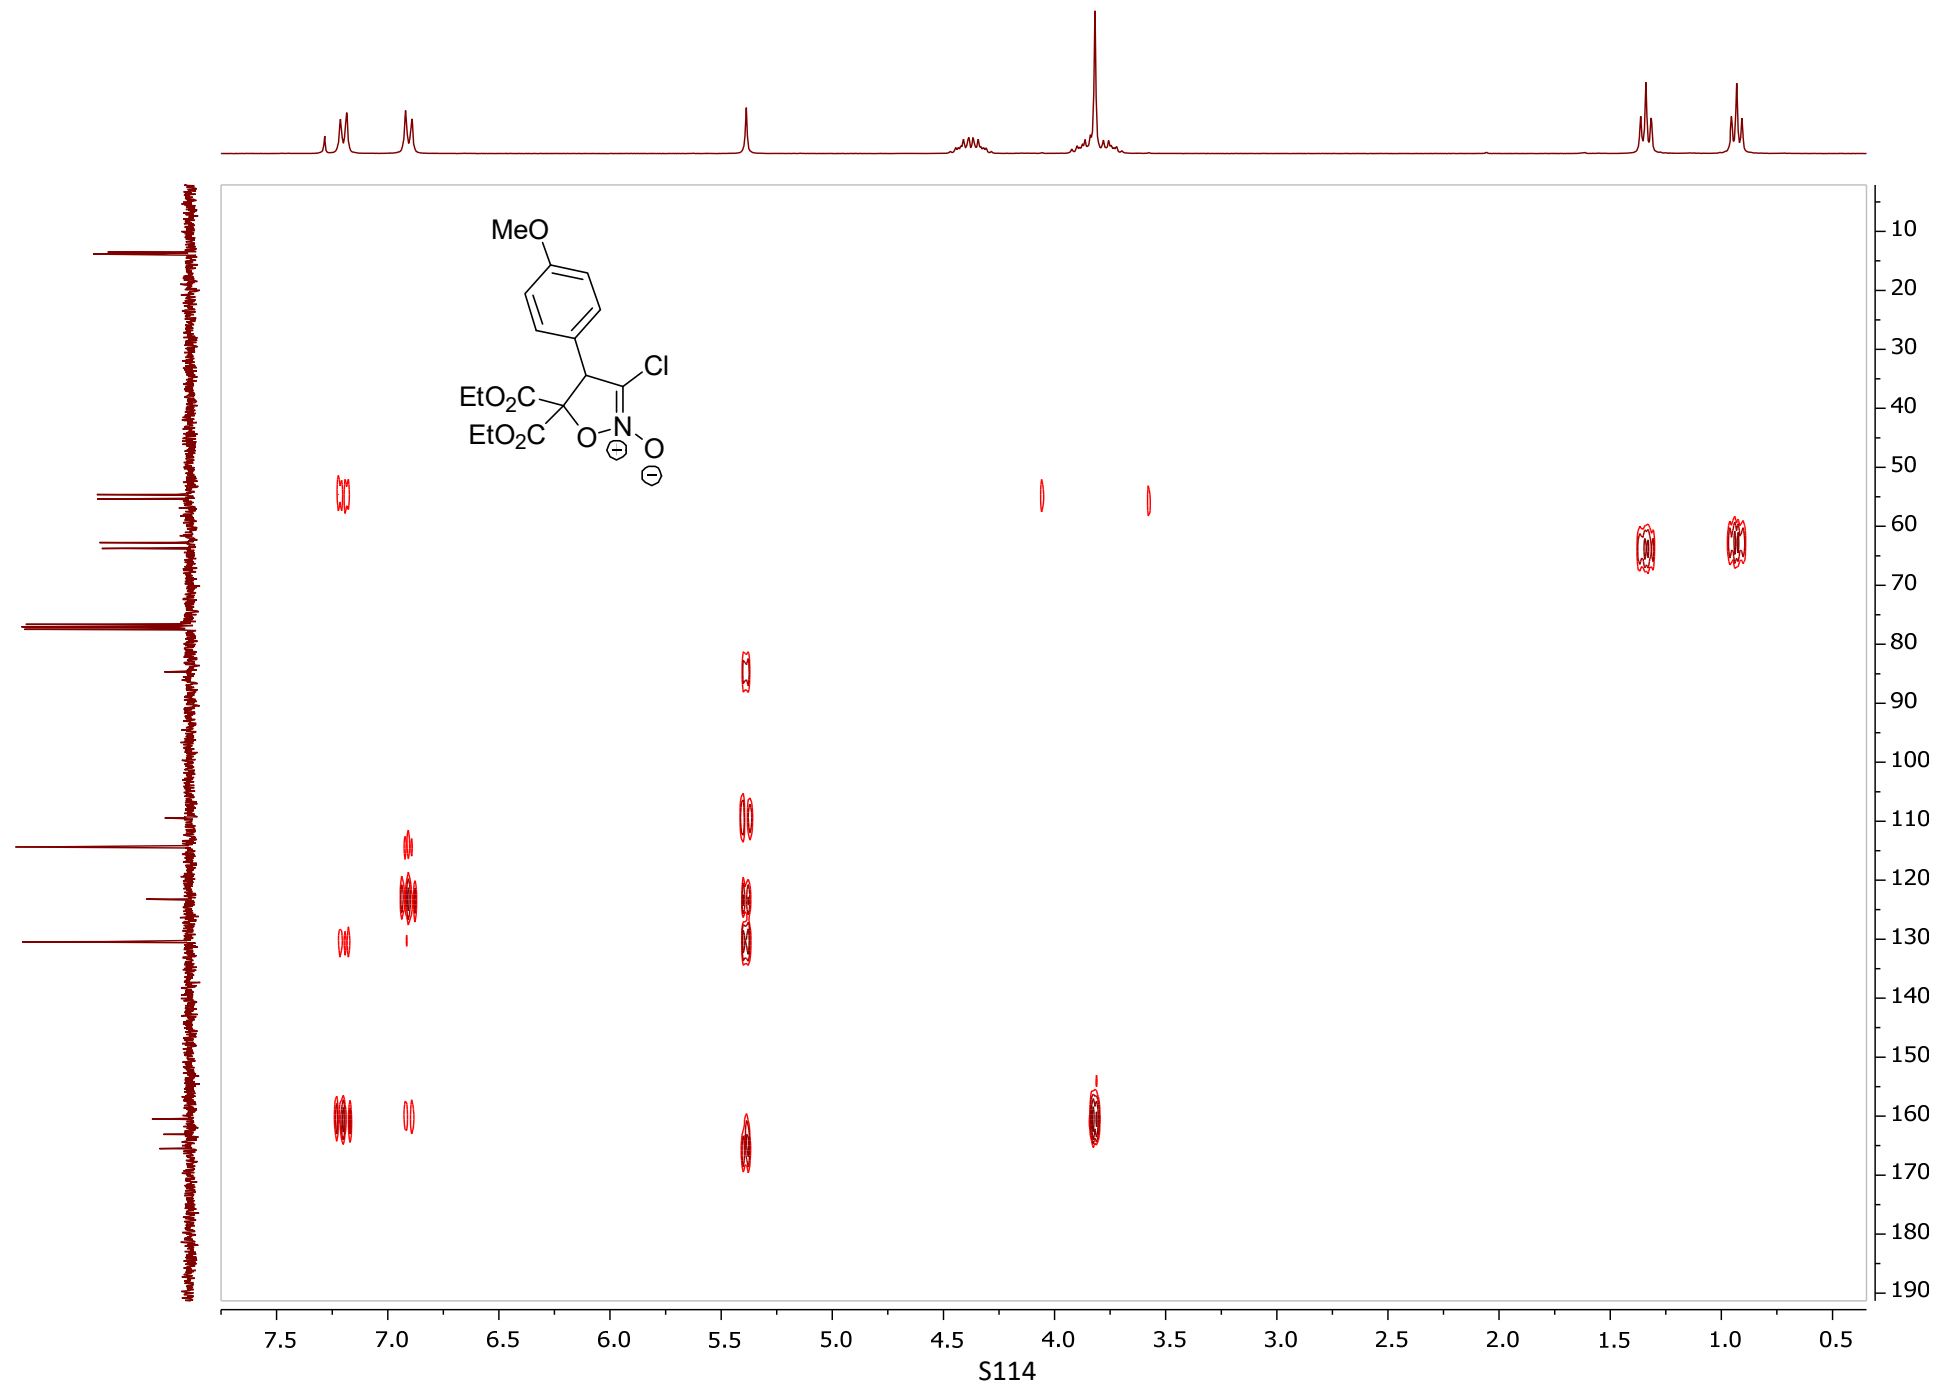

**3,3-Bis(ethoxycarbonyl)-3,3a,4,5,6,7-hexahydrobenzo[c]isoxazole 1-oxide 2e**

$^1\text{H}$  NMR (300 MHz,  $\text{CDCl}_3$ )

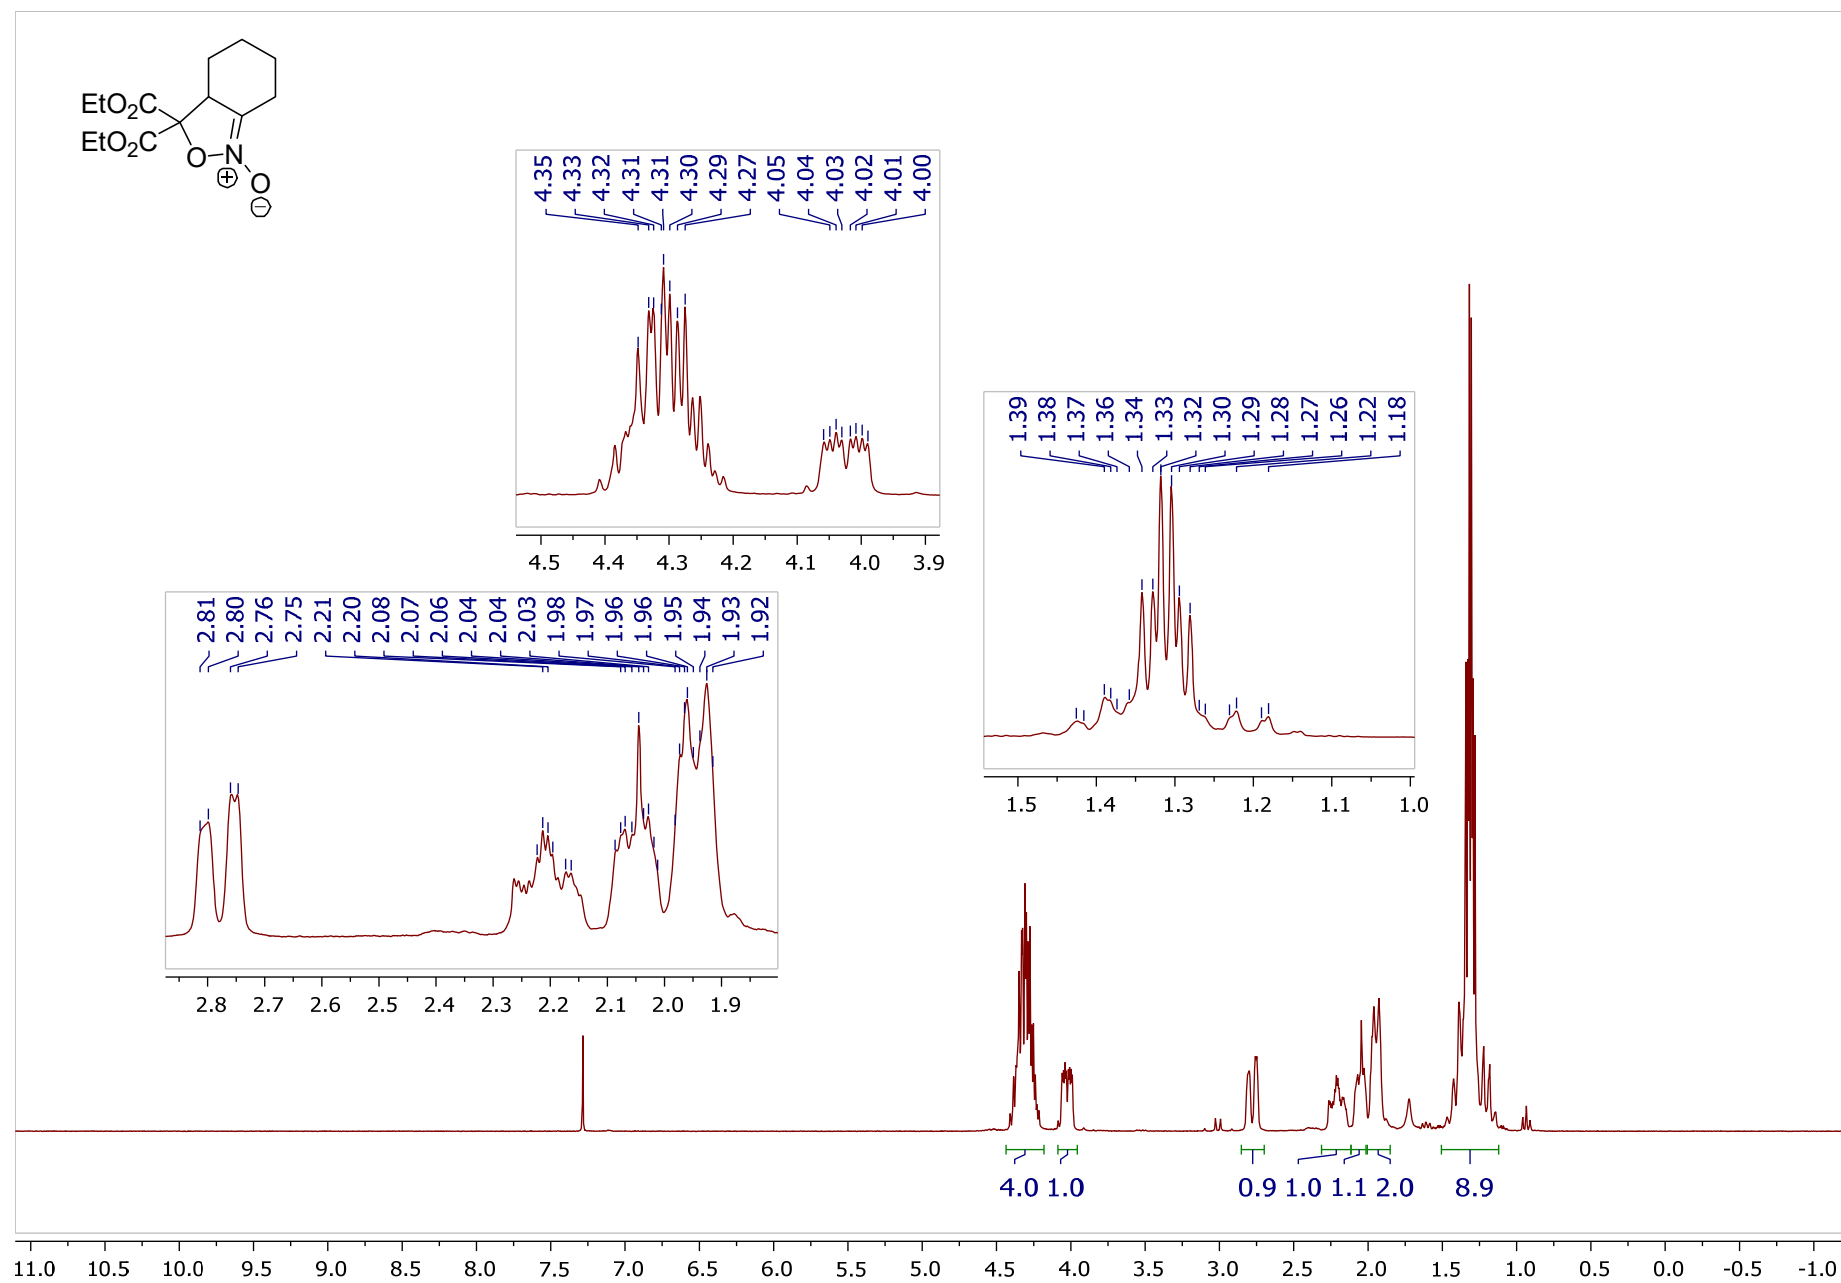

$^{13}\text{C}$  NMR (75 MHz,  $\text{CDCl}_3$ )

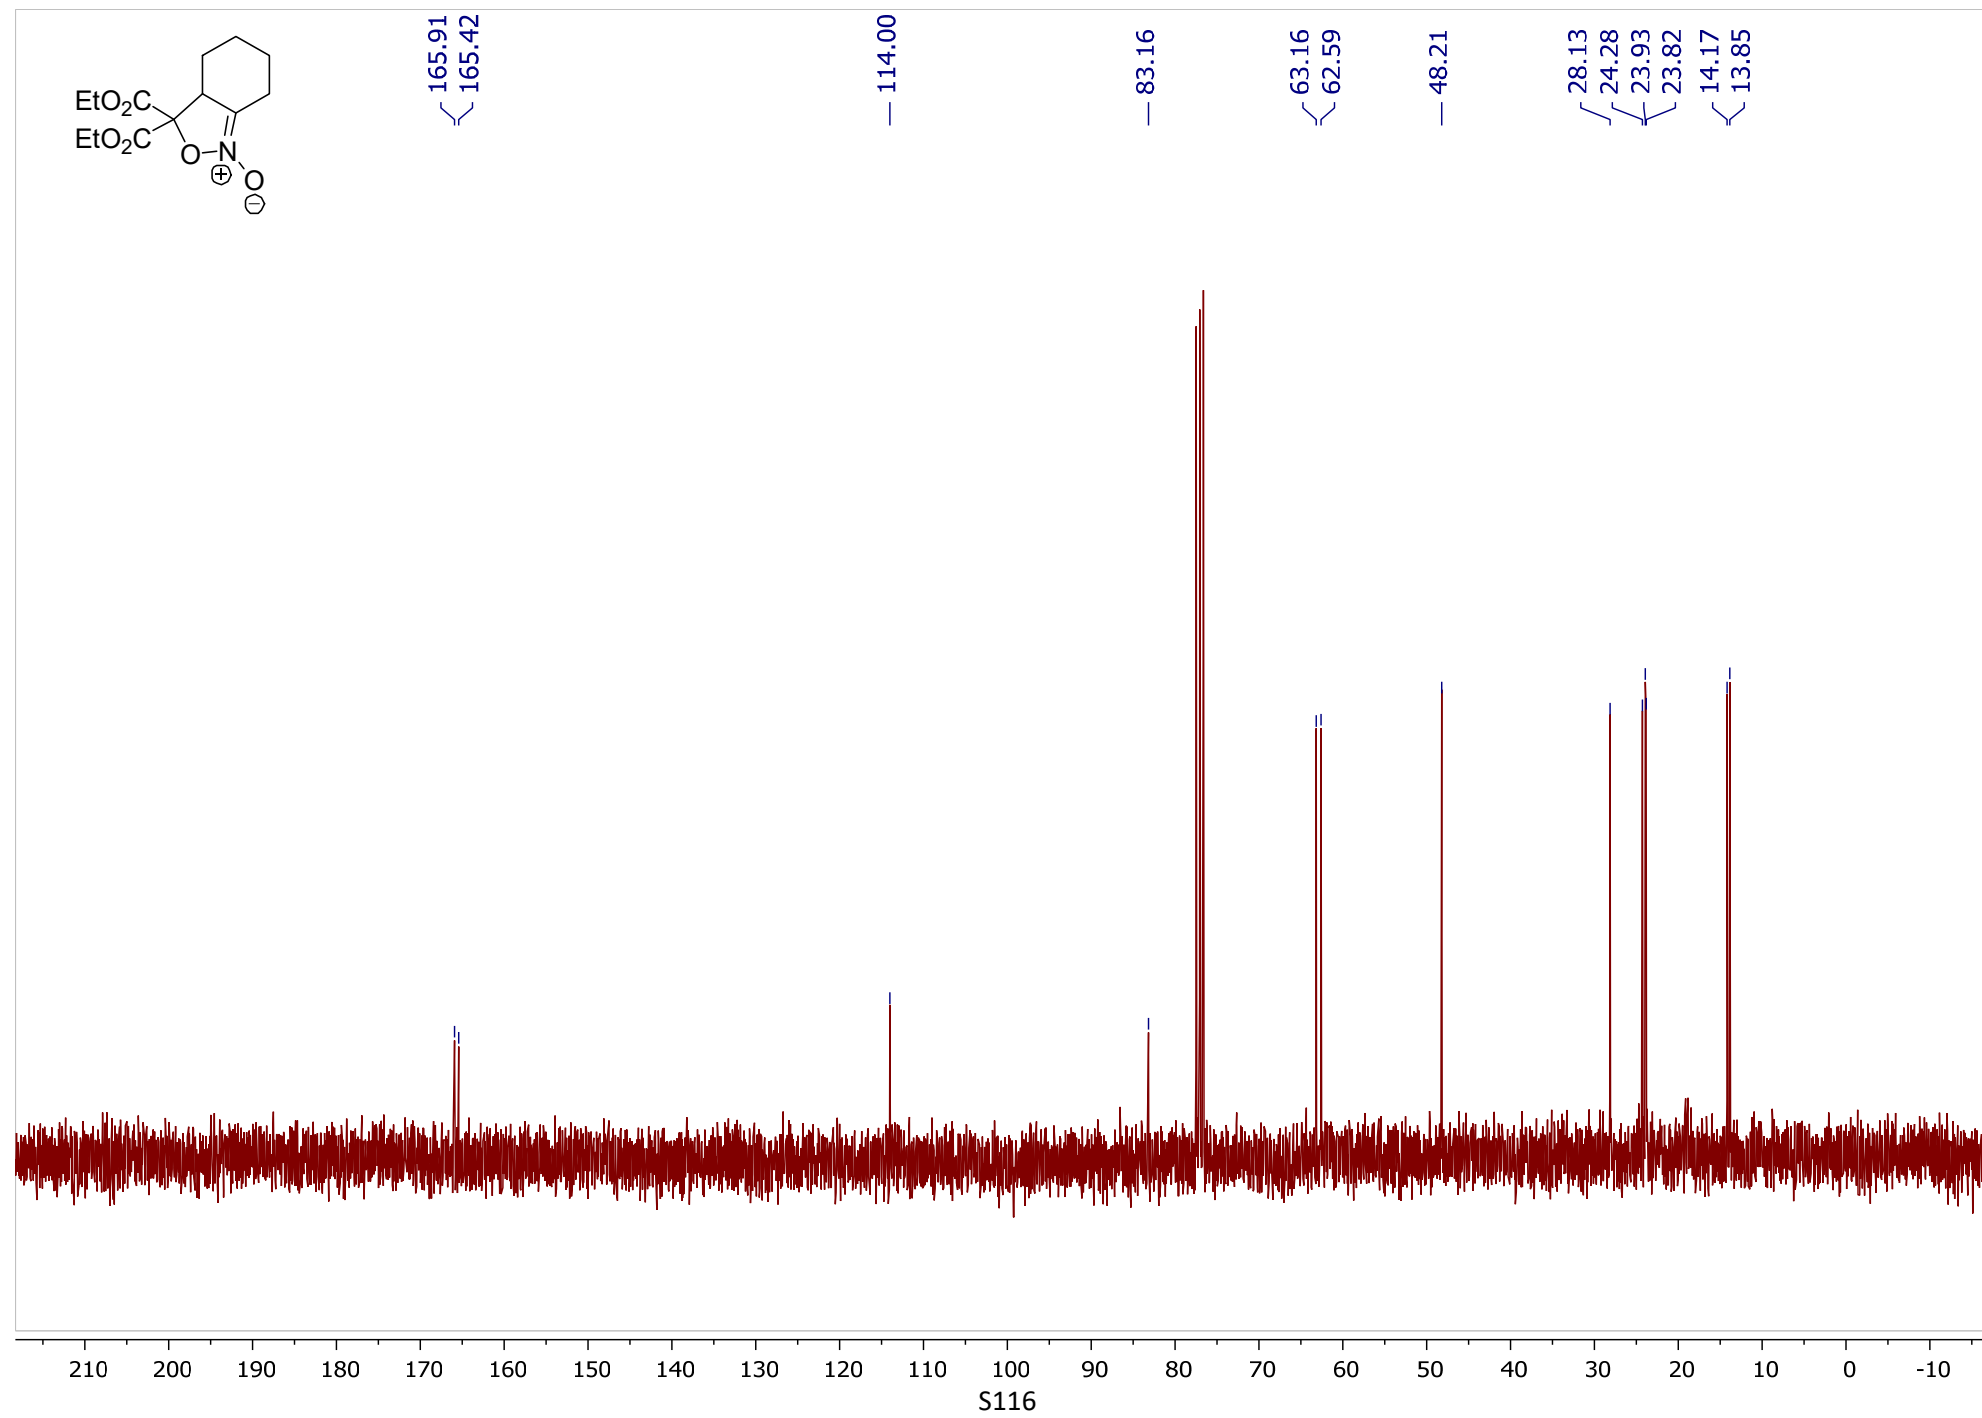

$^{13}\text{C}$  DEPT 135 (75 MHz,  $\text{CDCl}_3$ )

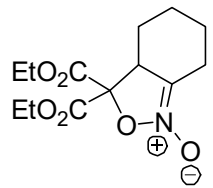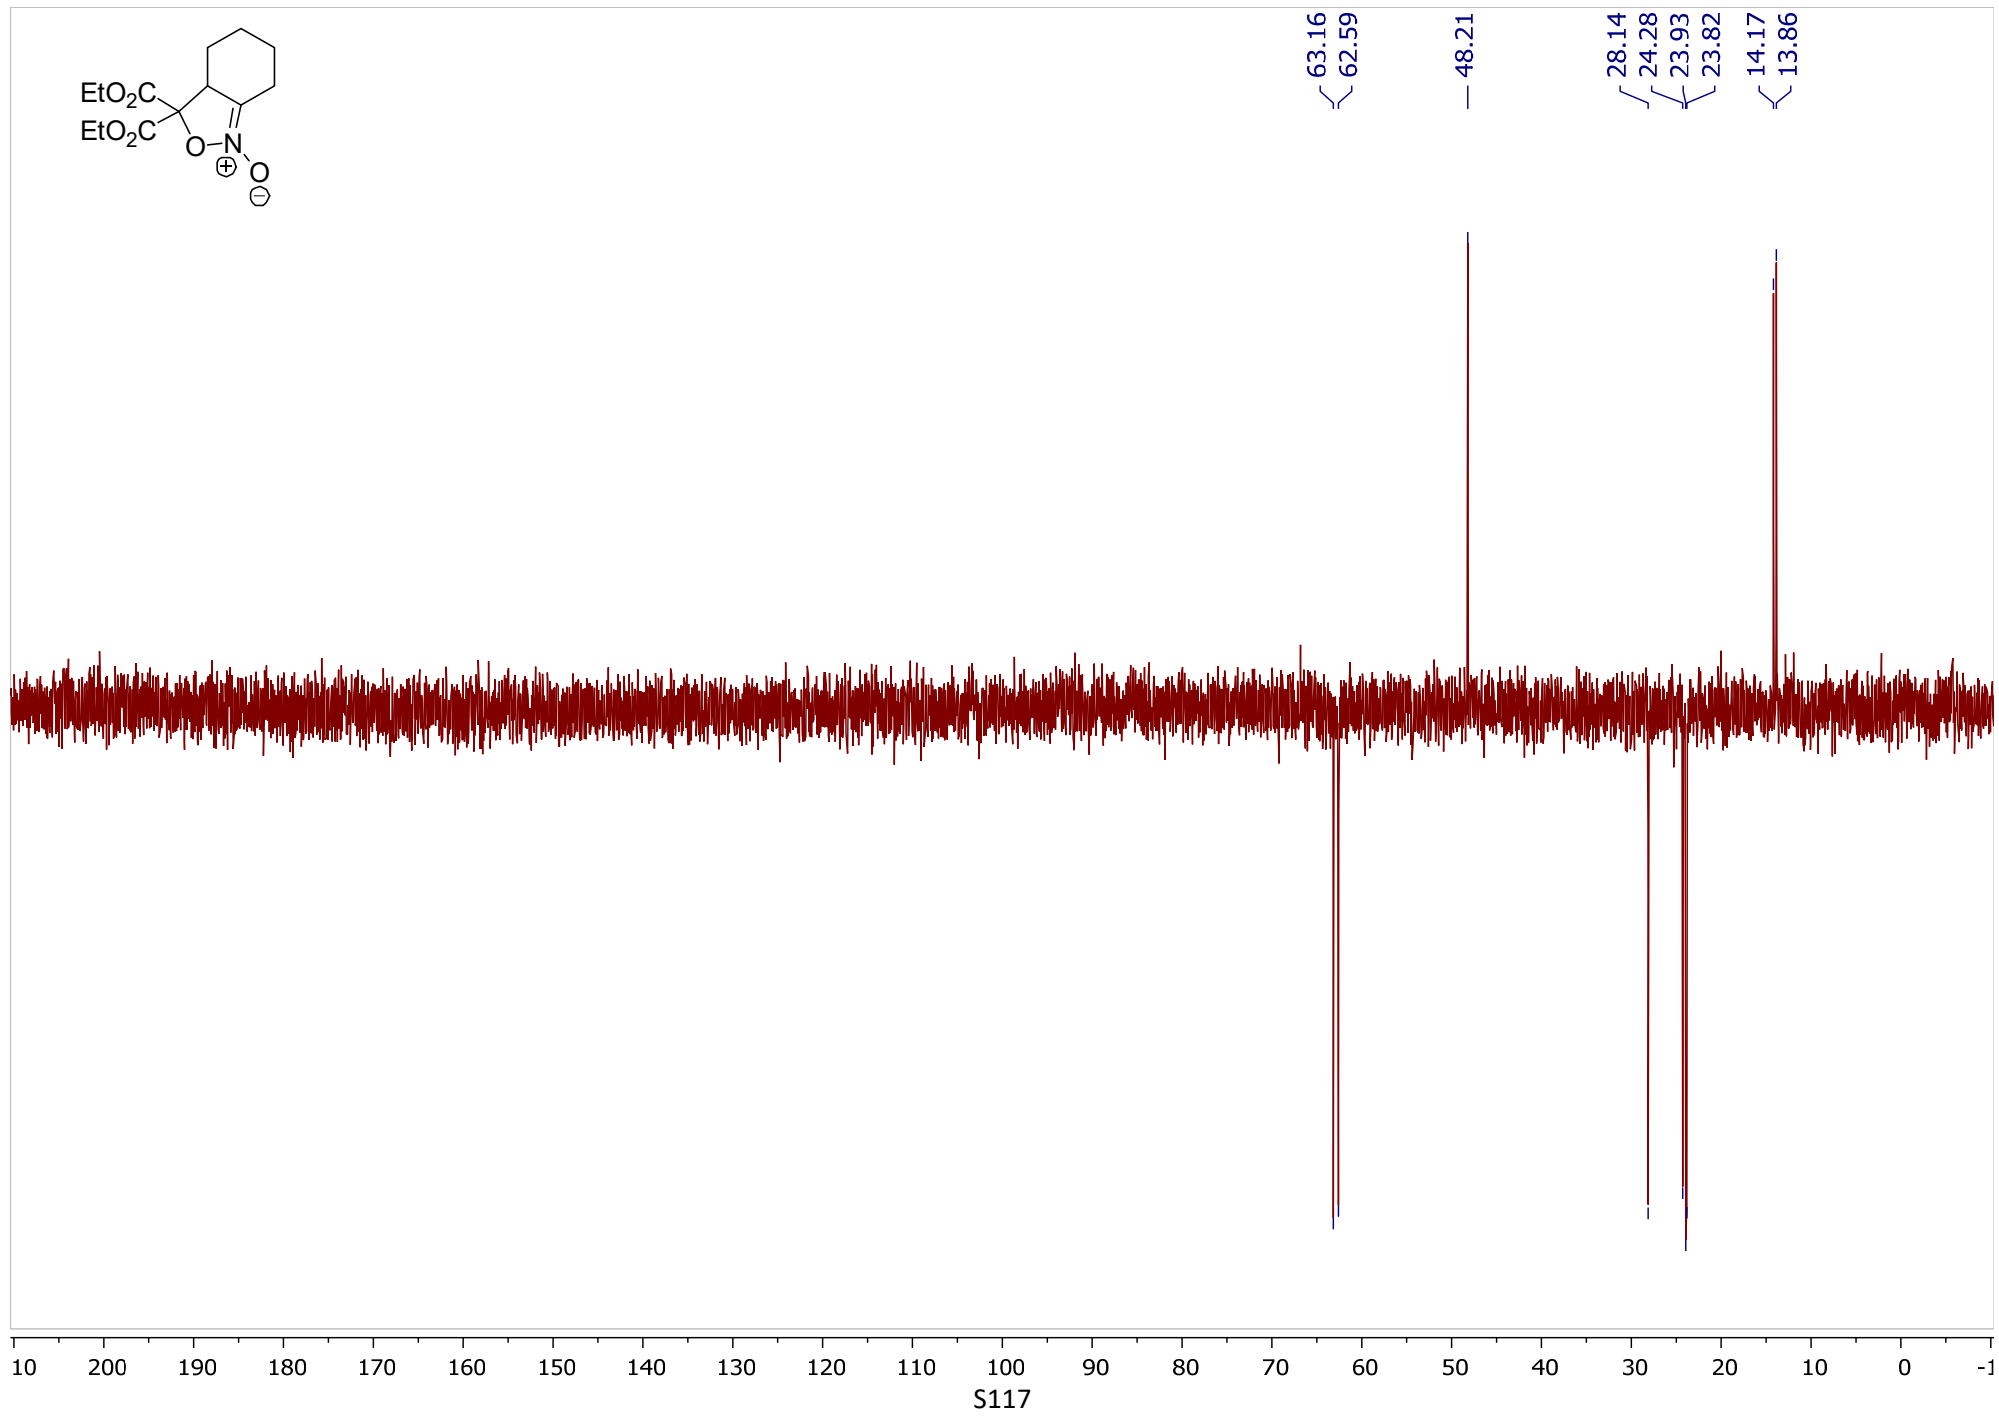

$^1\text{H}$ - $^1\text{H}$  COSY

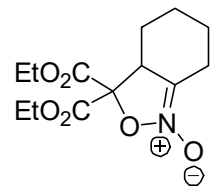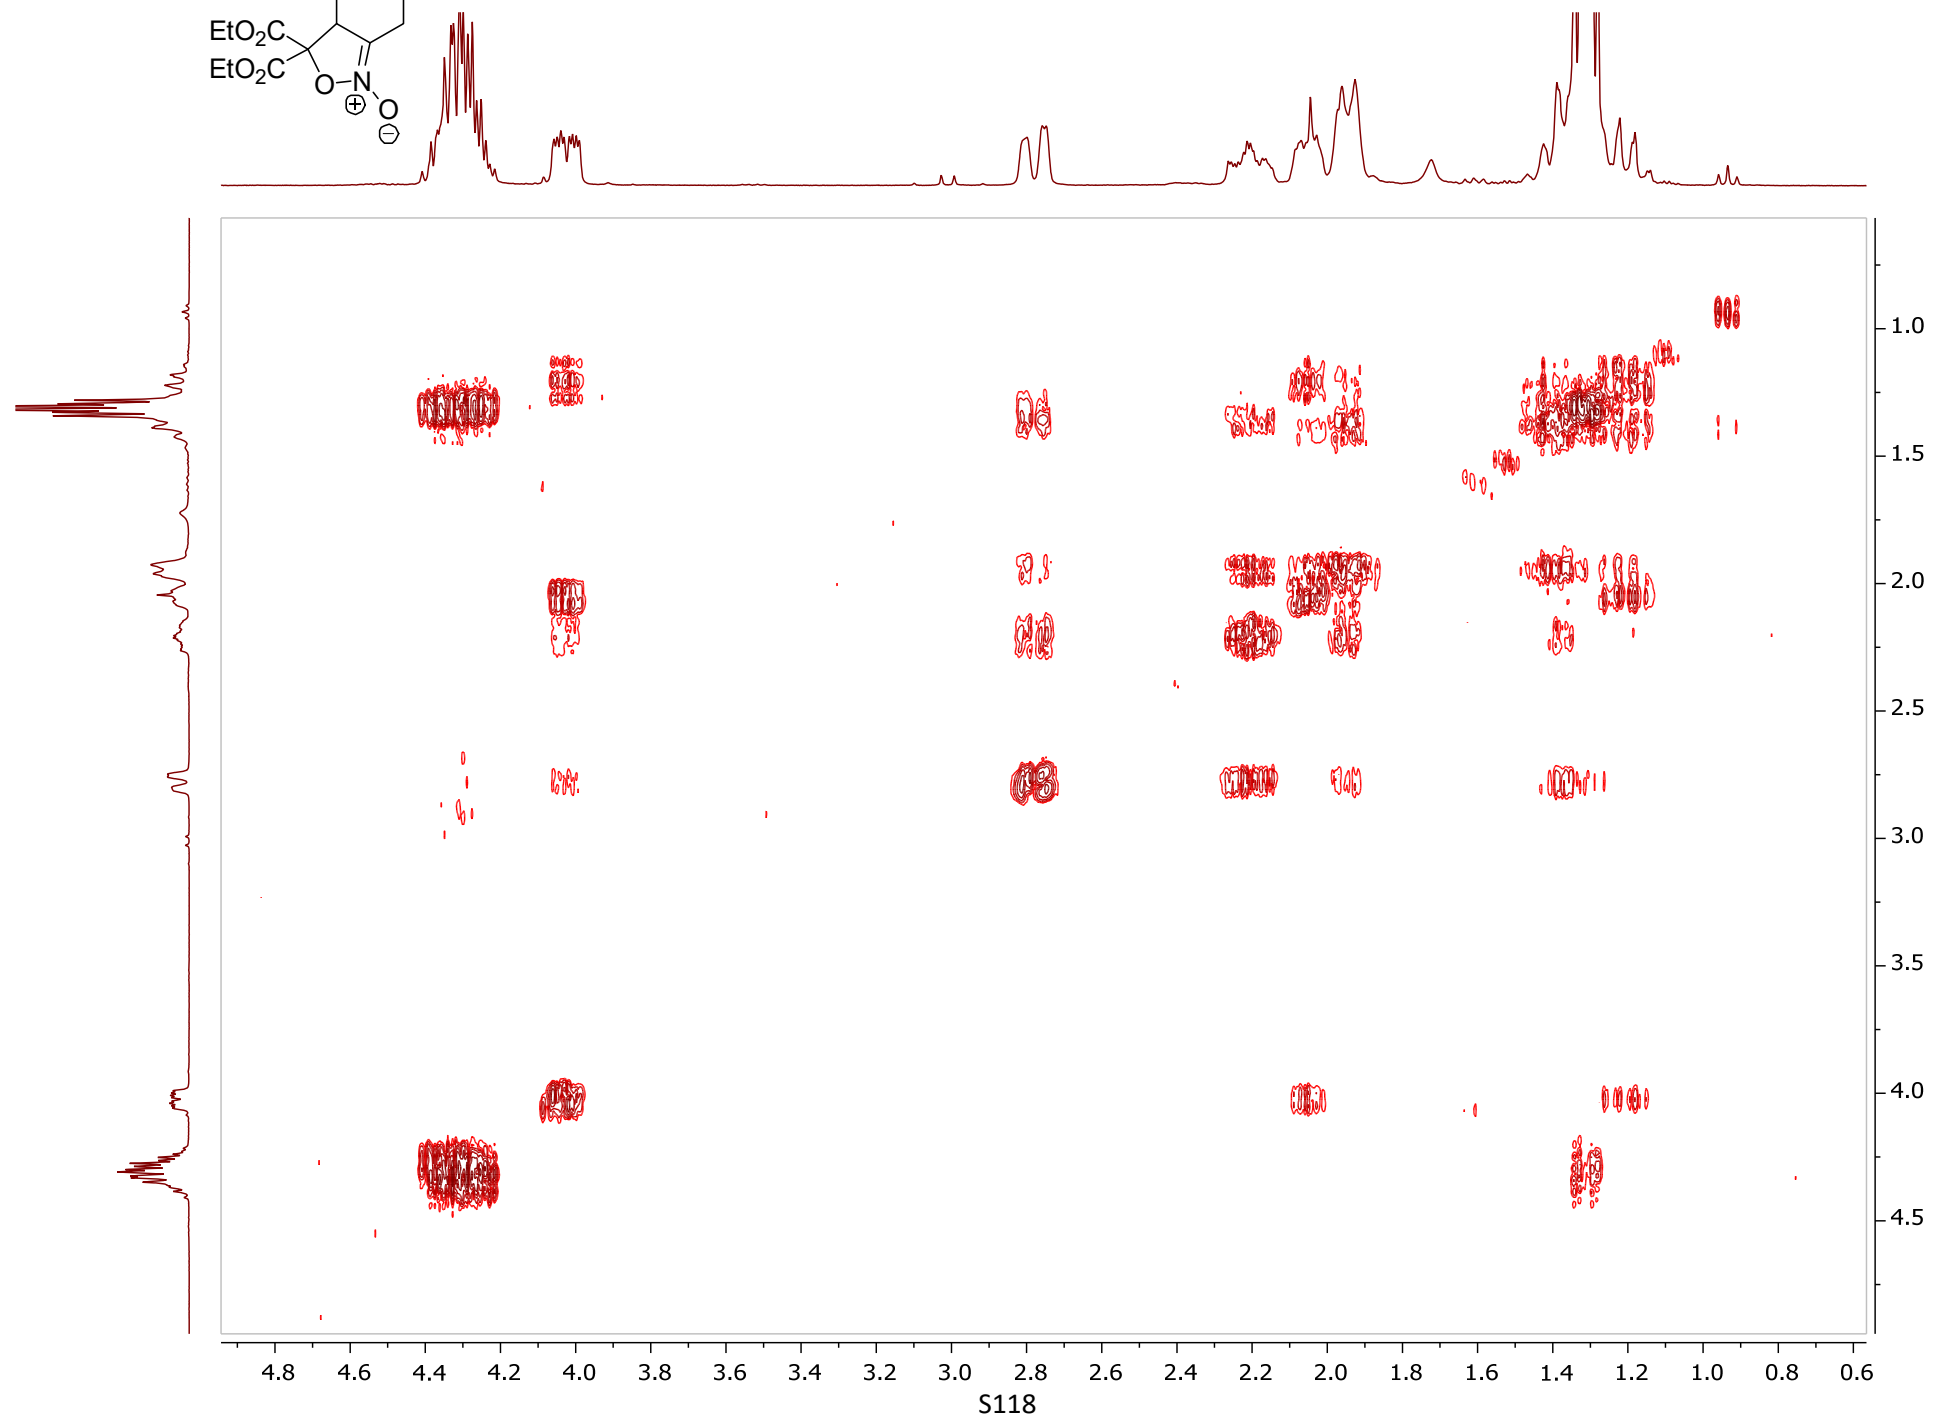

$^1\text{H}$ - $^{13}\text{C}$  HSQC

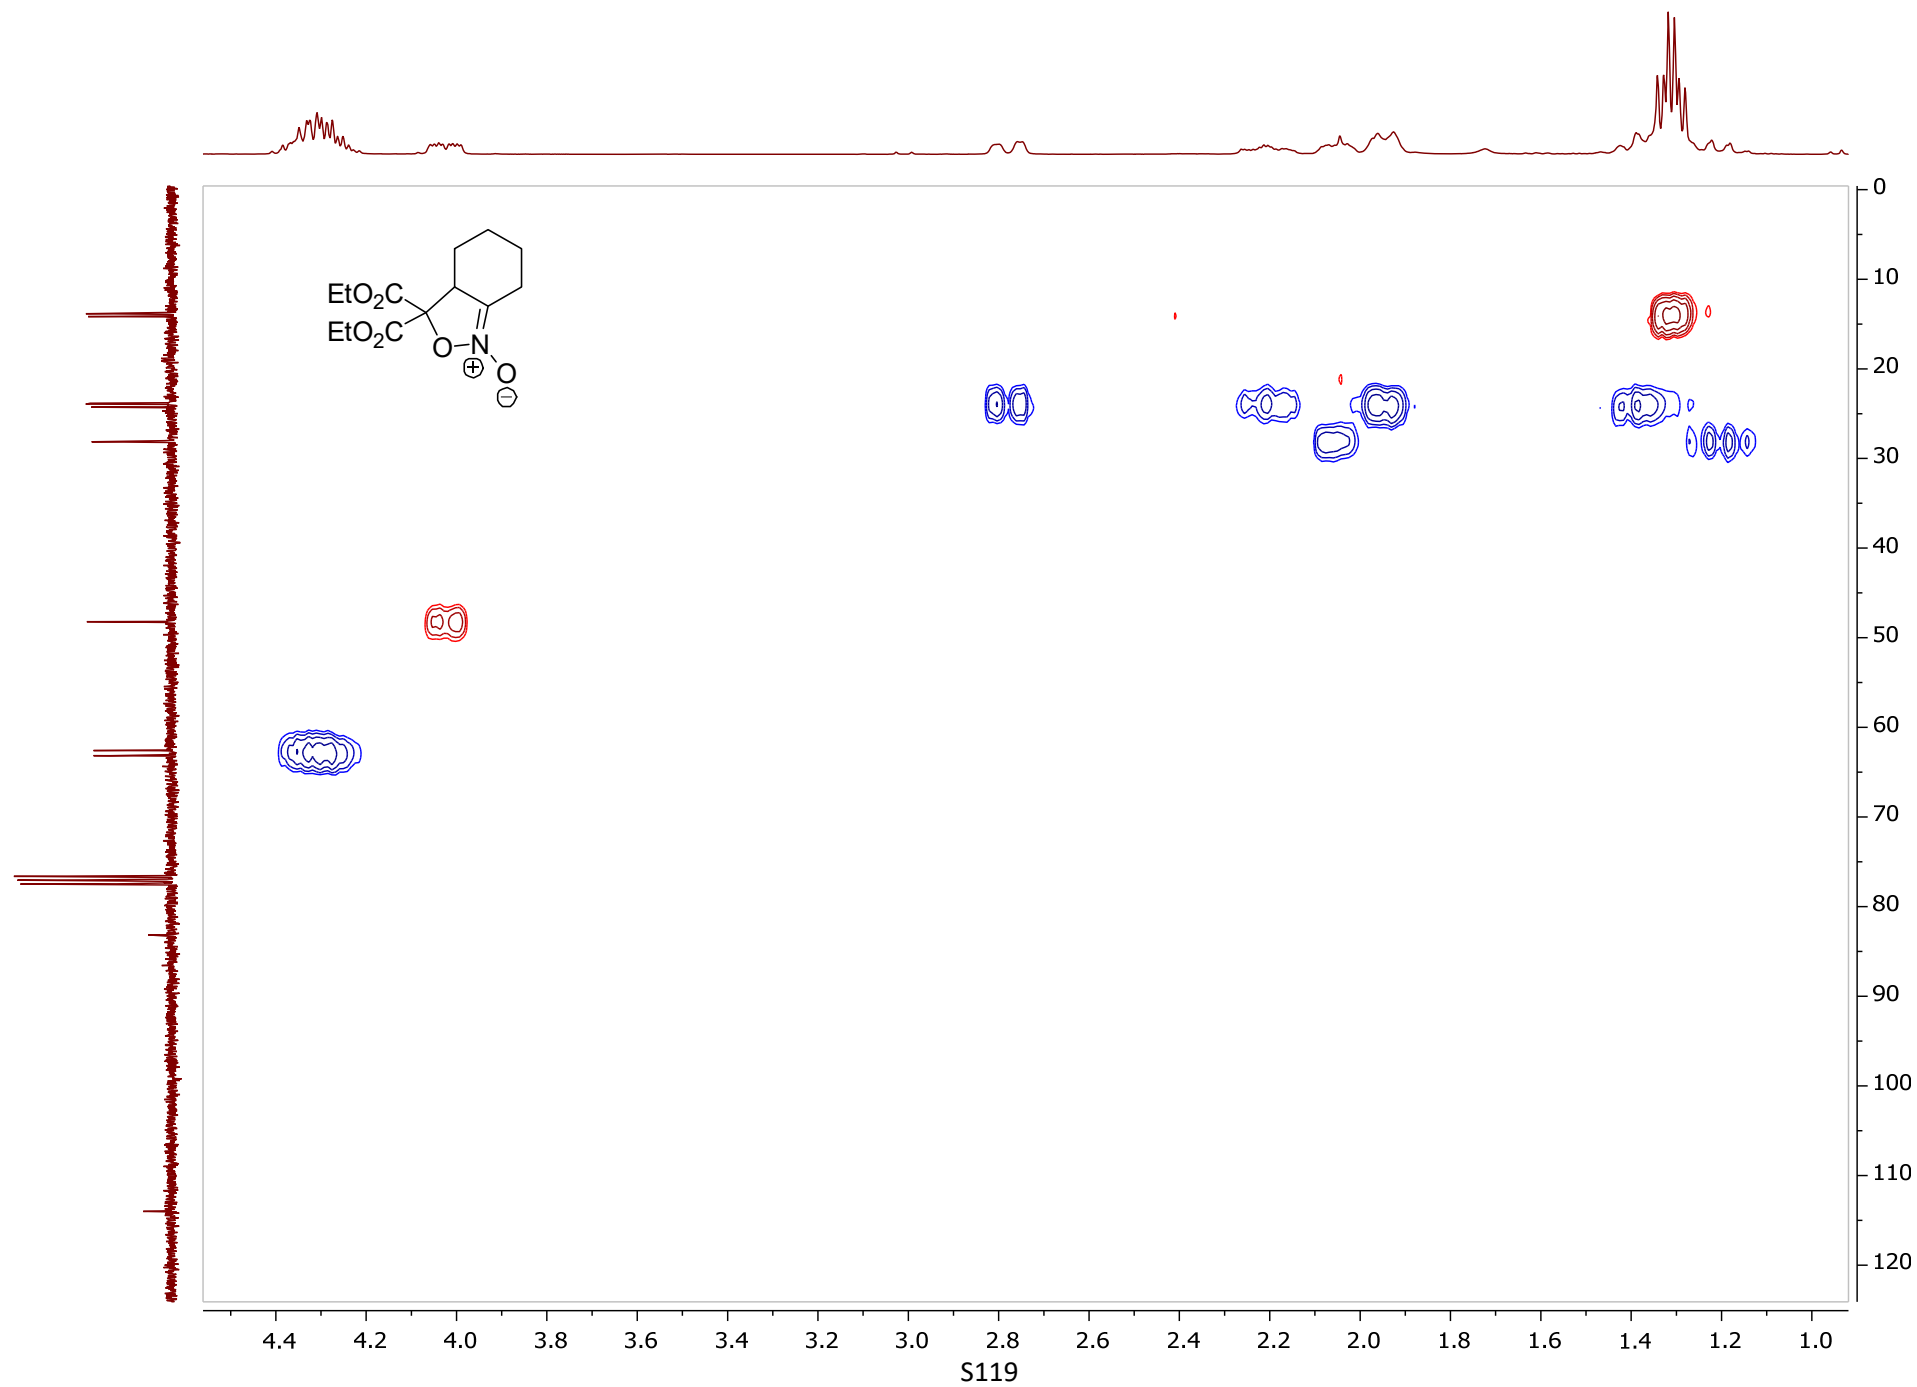

4-(4-Methoxyphenyl)-3-methyl-4,5-dihydroisoxazole 2-oxide 2f

$^1\text{H}$  NMR (300 MHz,  $\text{CDCl}_3$ )

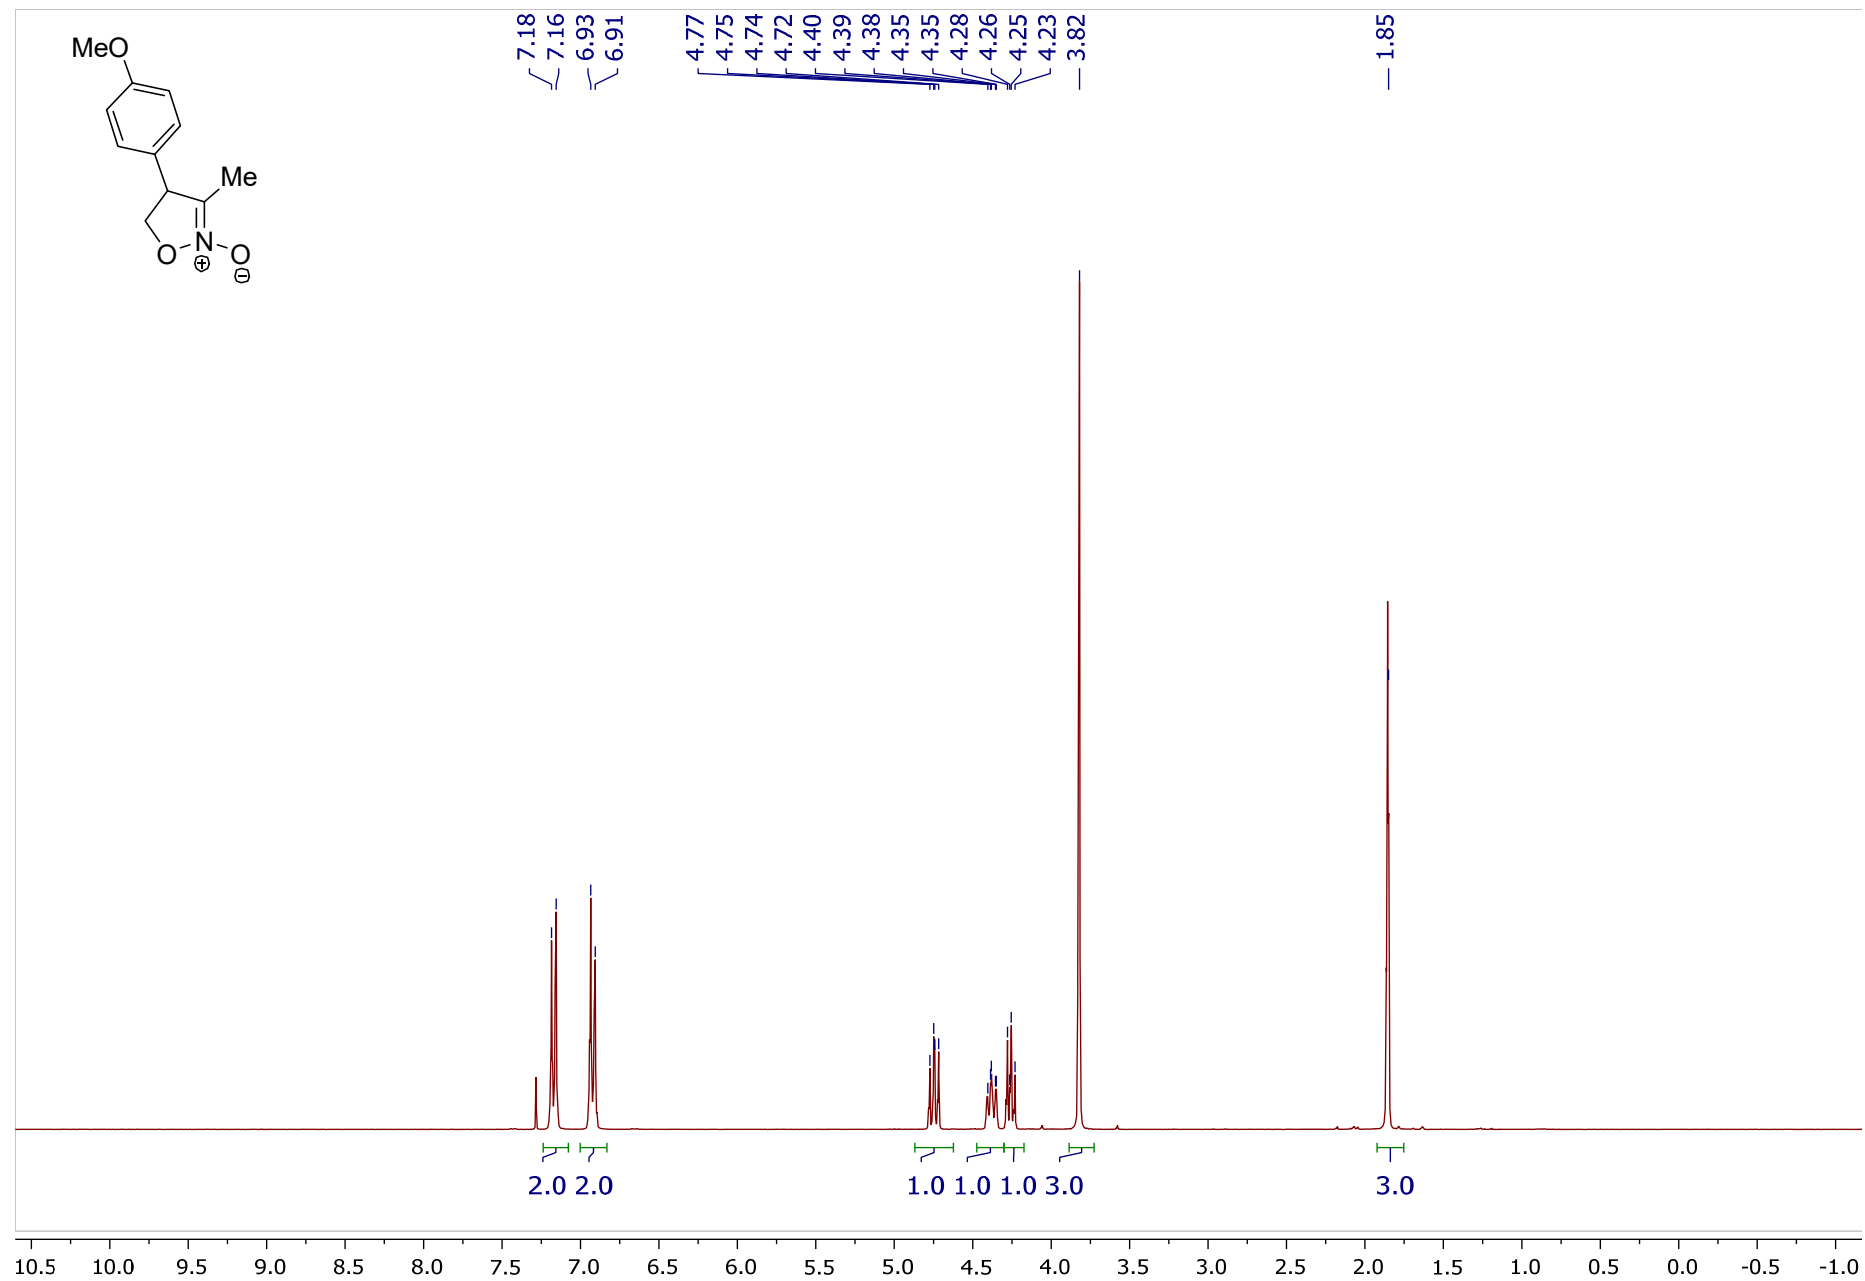



**(4*S*\*,4*aS*\*)-4-(4-Methoxyphenyl)-2,2,4*a*-trimethyl-2,3,4,4*a*-tetrahydrobenzo[4,5]isoxazolo[2,3-*b*][1,2]oxazine 5aa**

<sup>1</sup>H NMR (300 MHz, CDCl<sub>3</sub>)

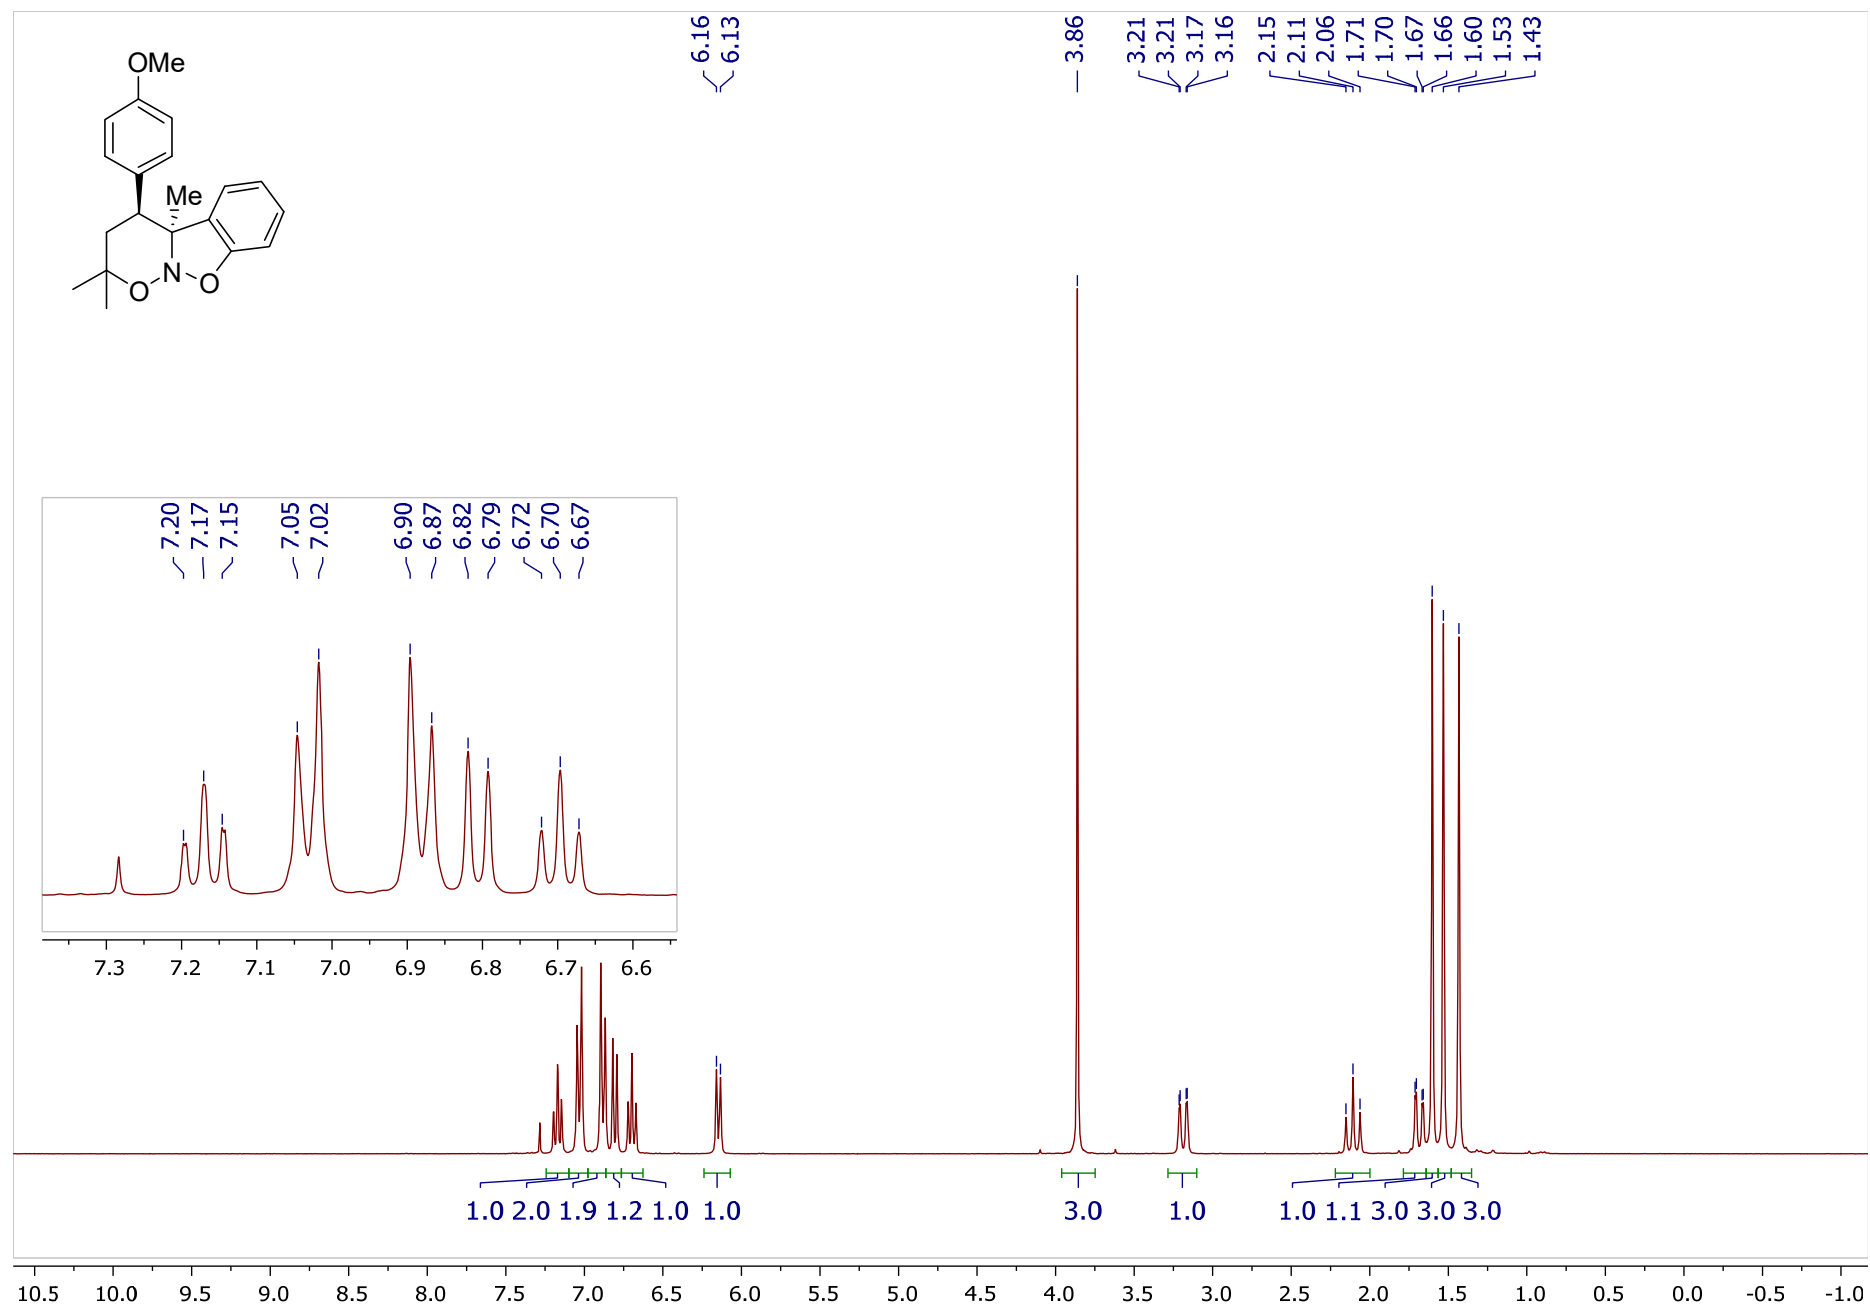

<sup>13</sup>C NMR (75 MHz, CDCl<sub>3</sub>)

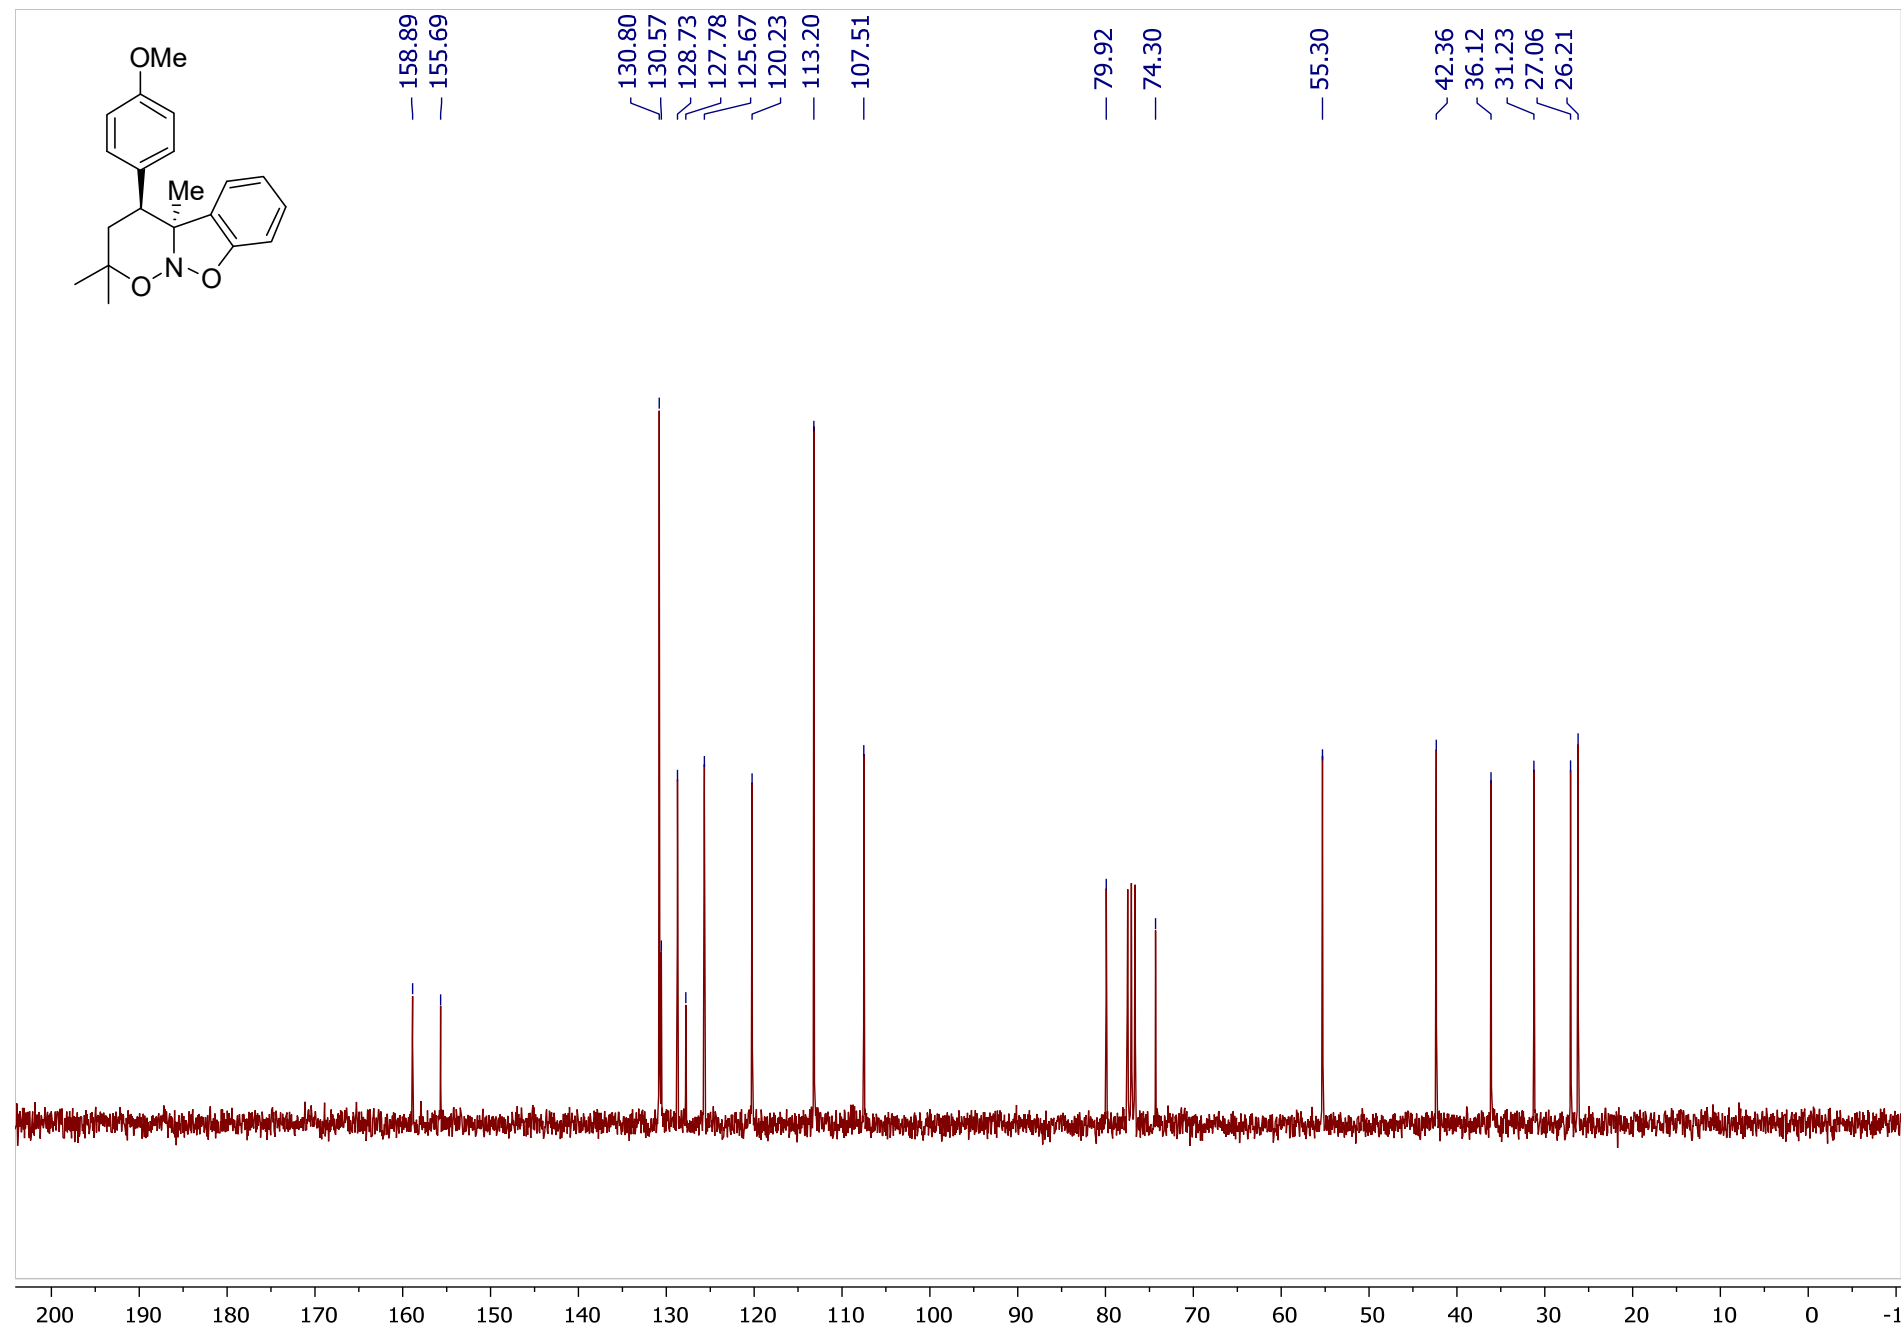

$^{13}\text{C}$  DEPT 135 (75 MHz,  $\text{CDCl}_3$ )

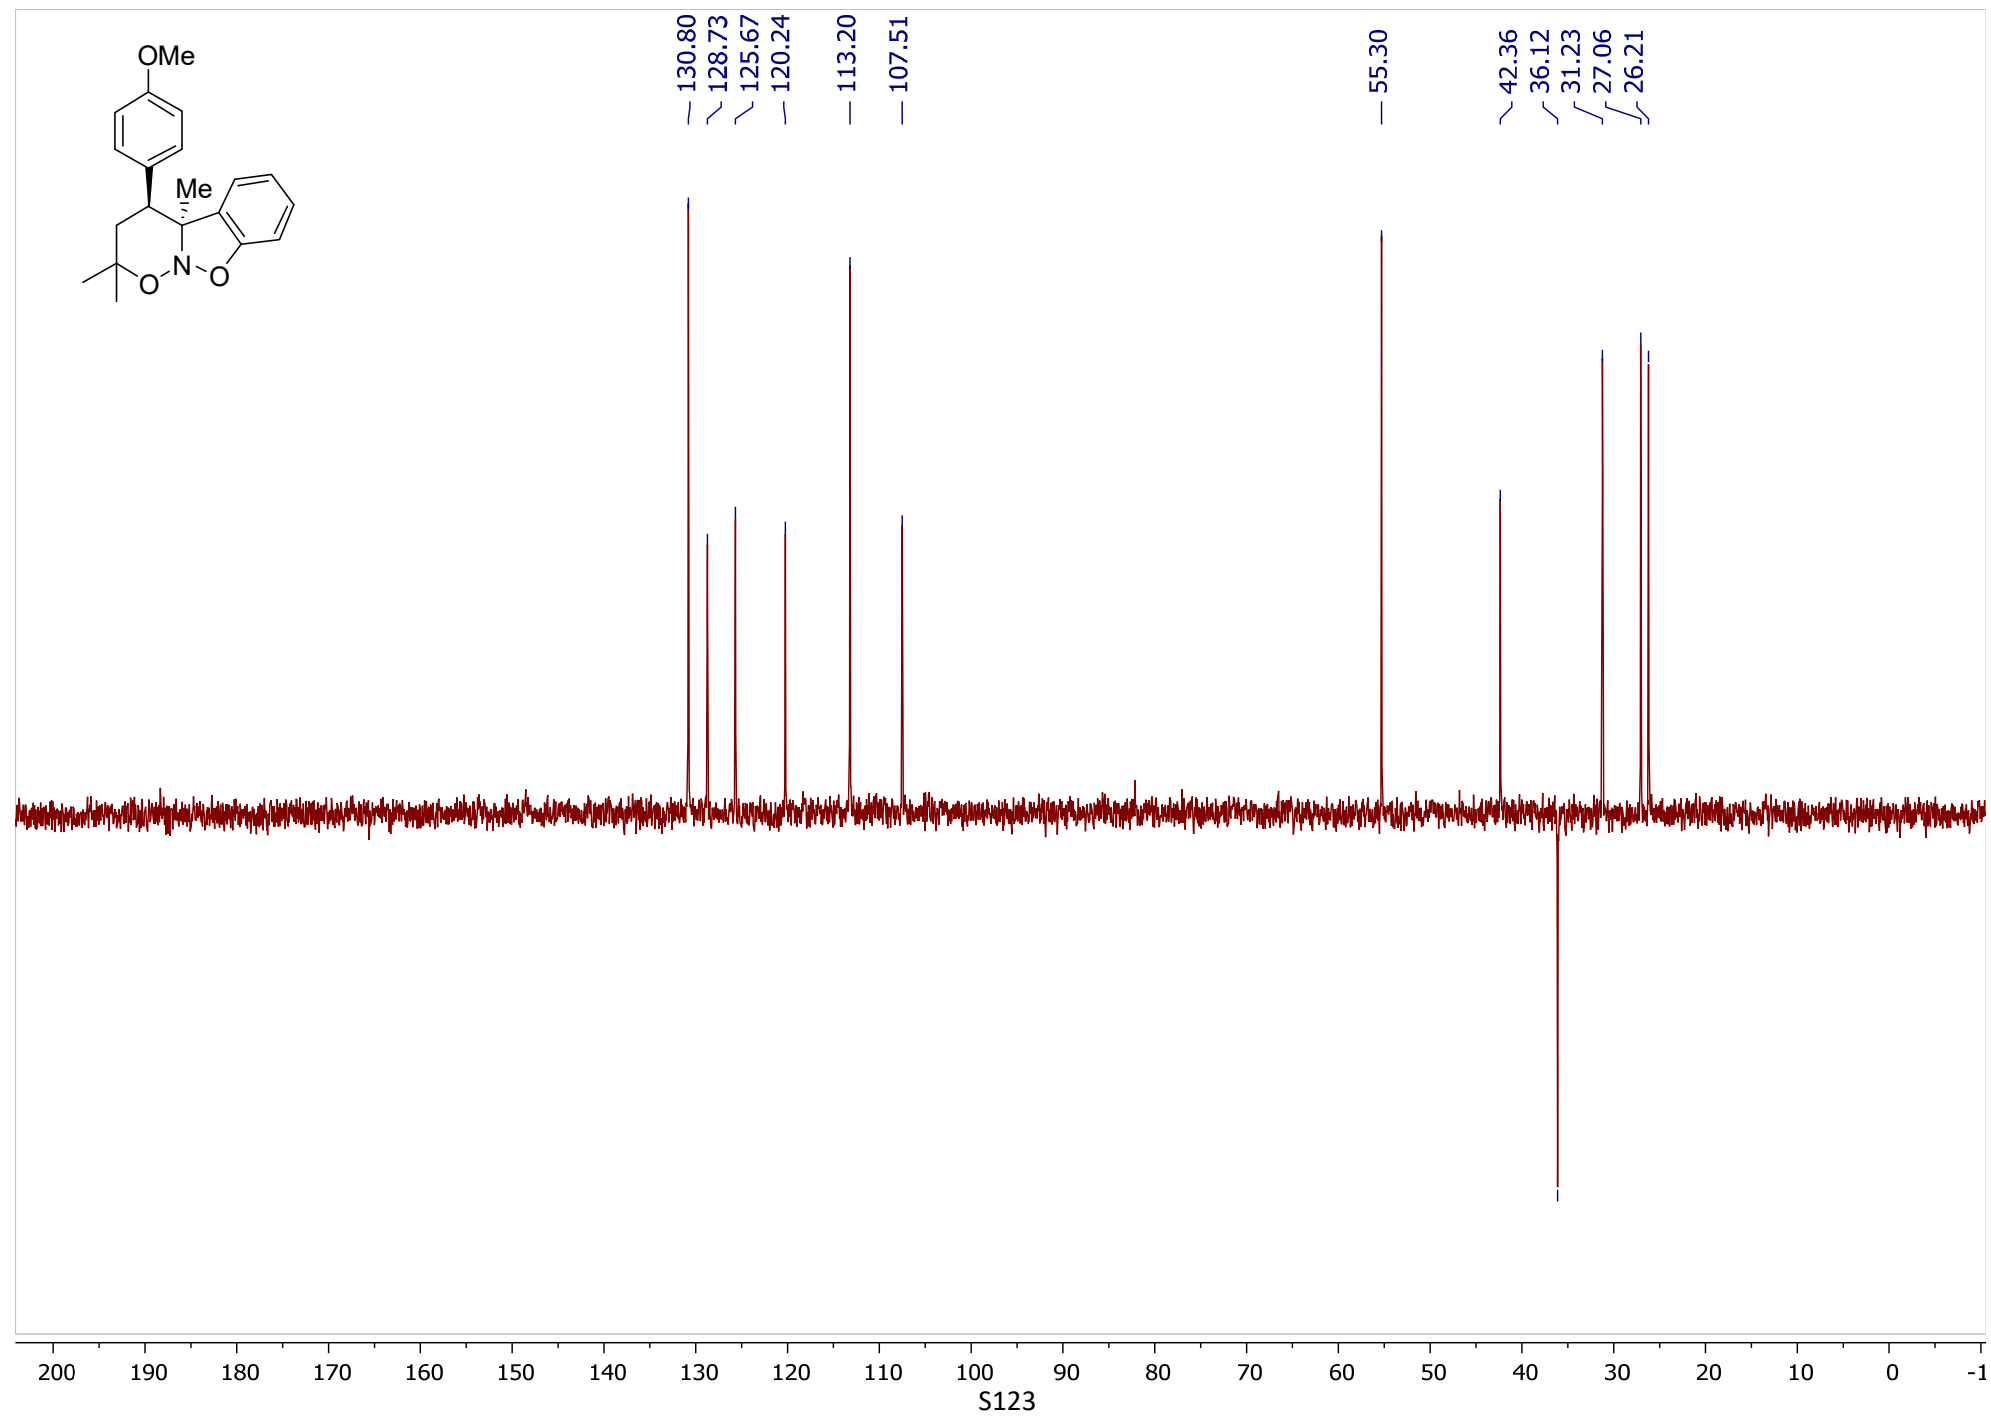

$^1\text{H}$ - $^{13}\text{C}$  HMBC

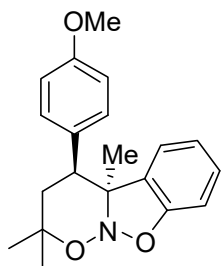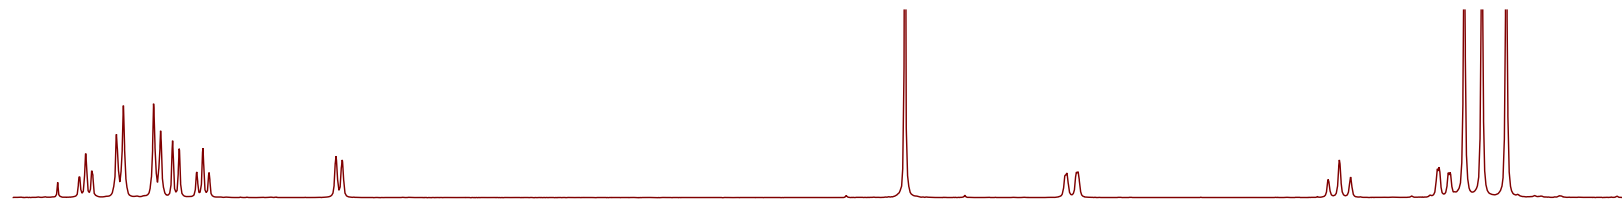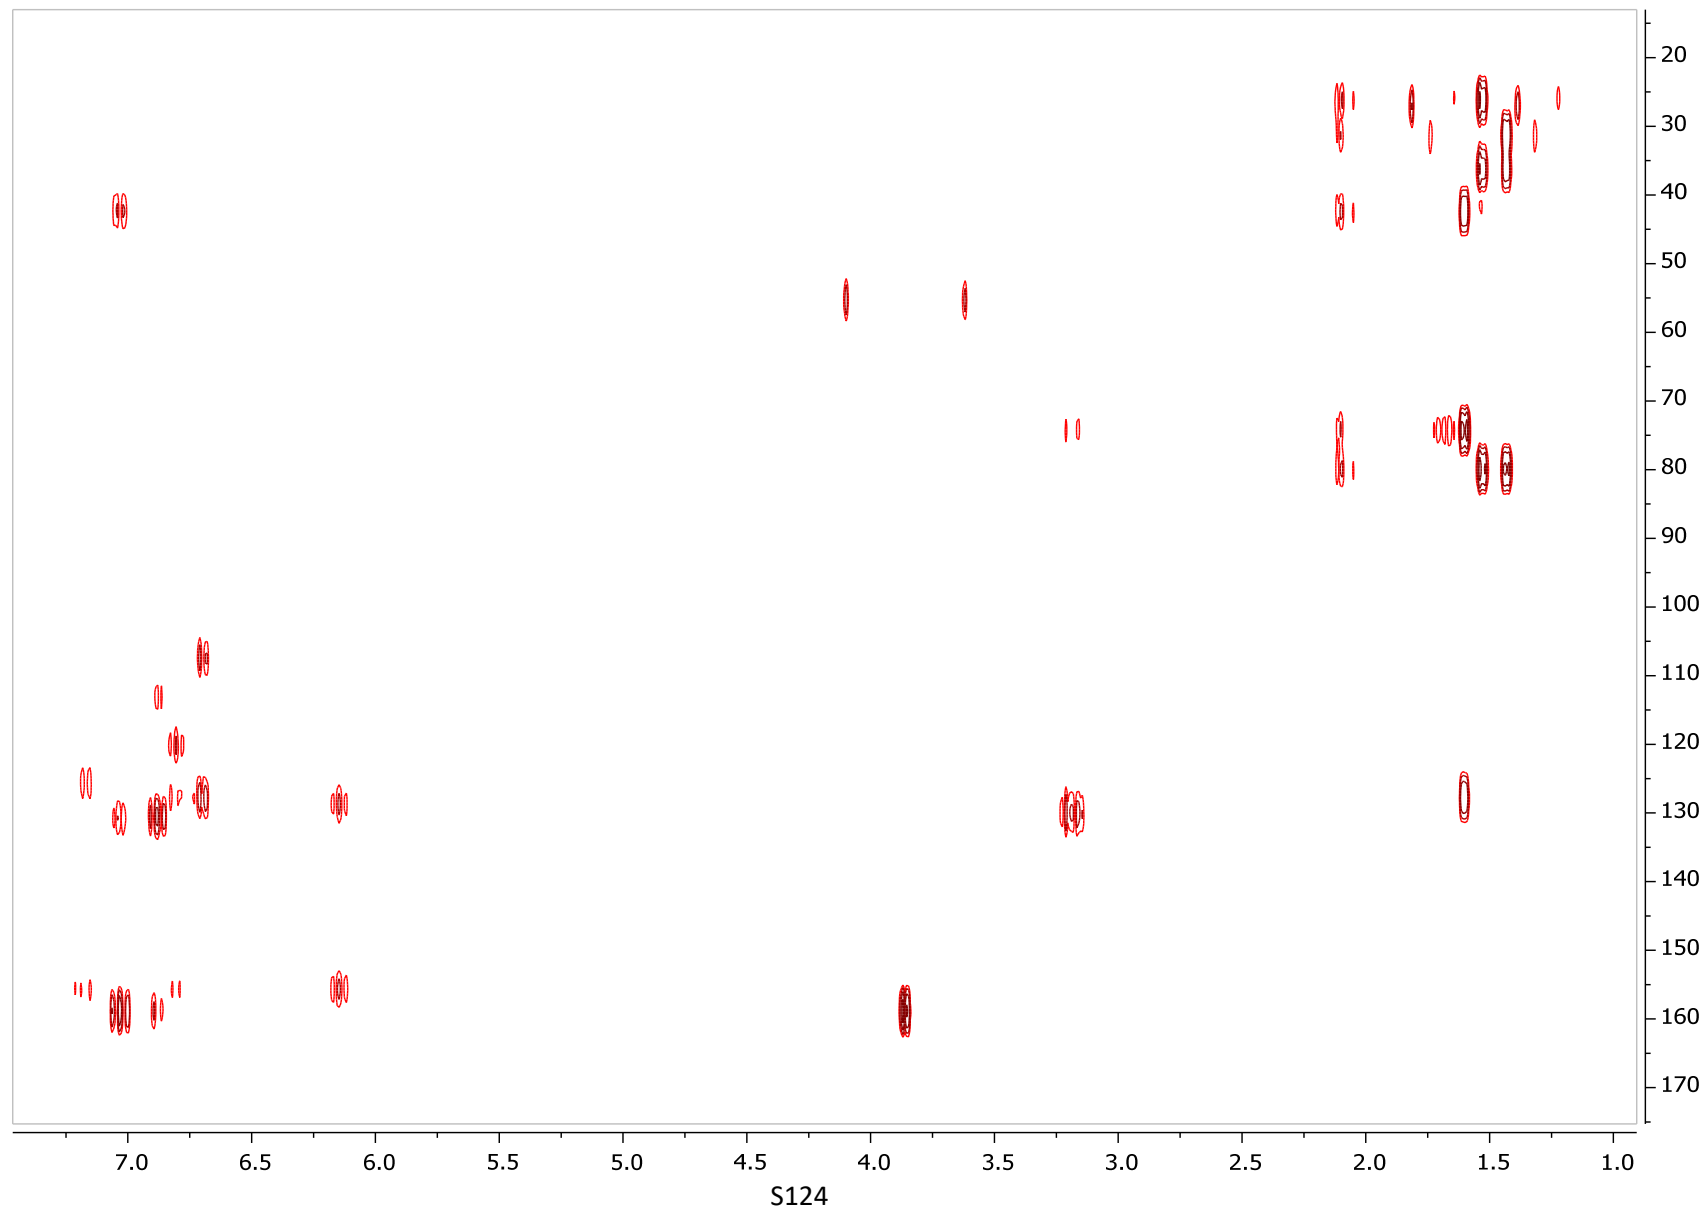

$^1\text{H}$ - $^1\text{H}$  NOESY

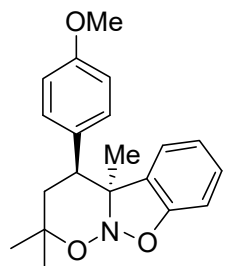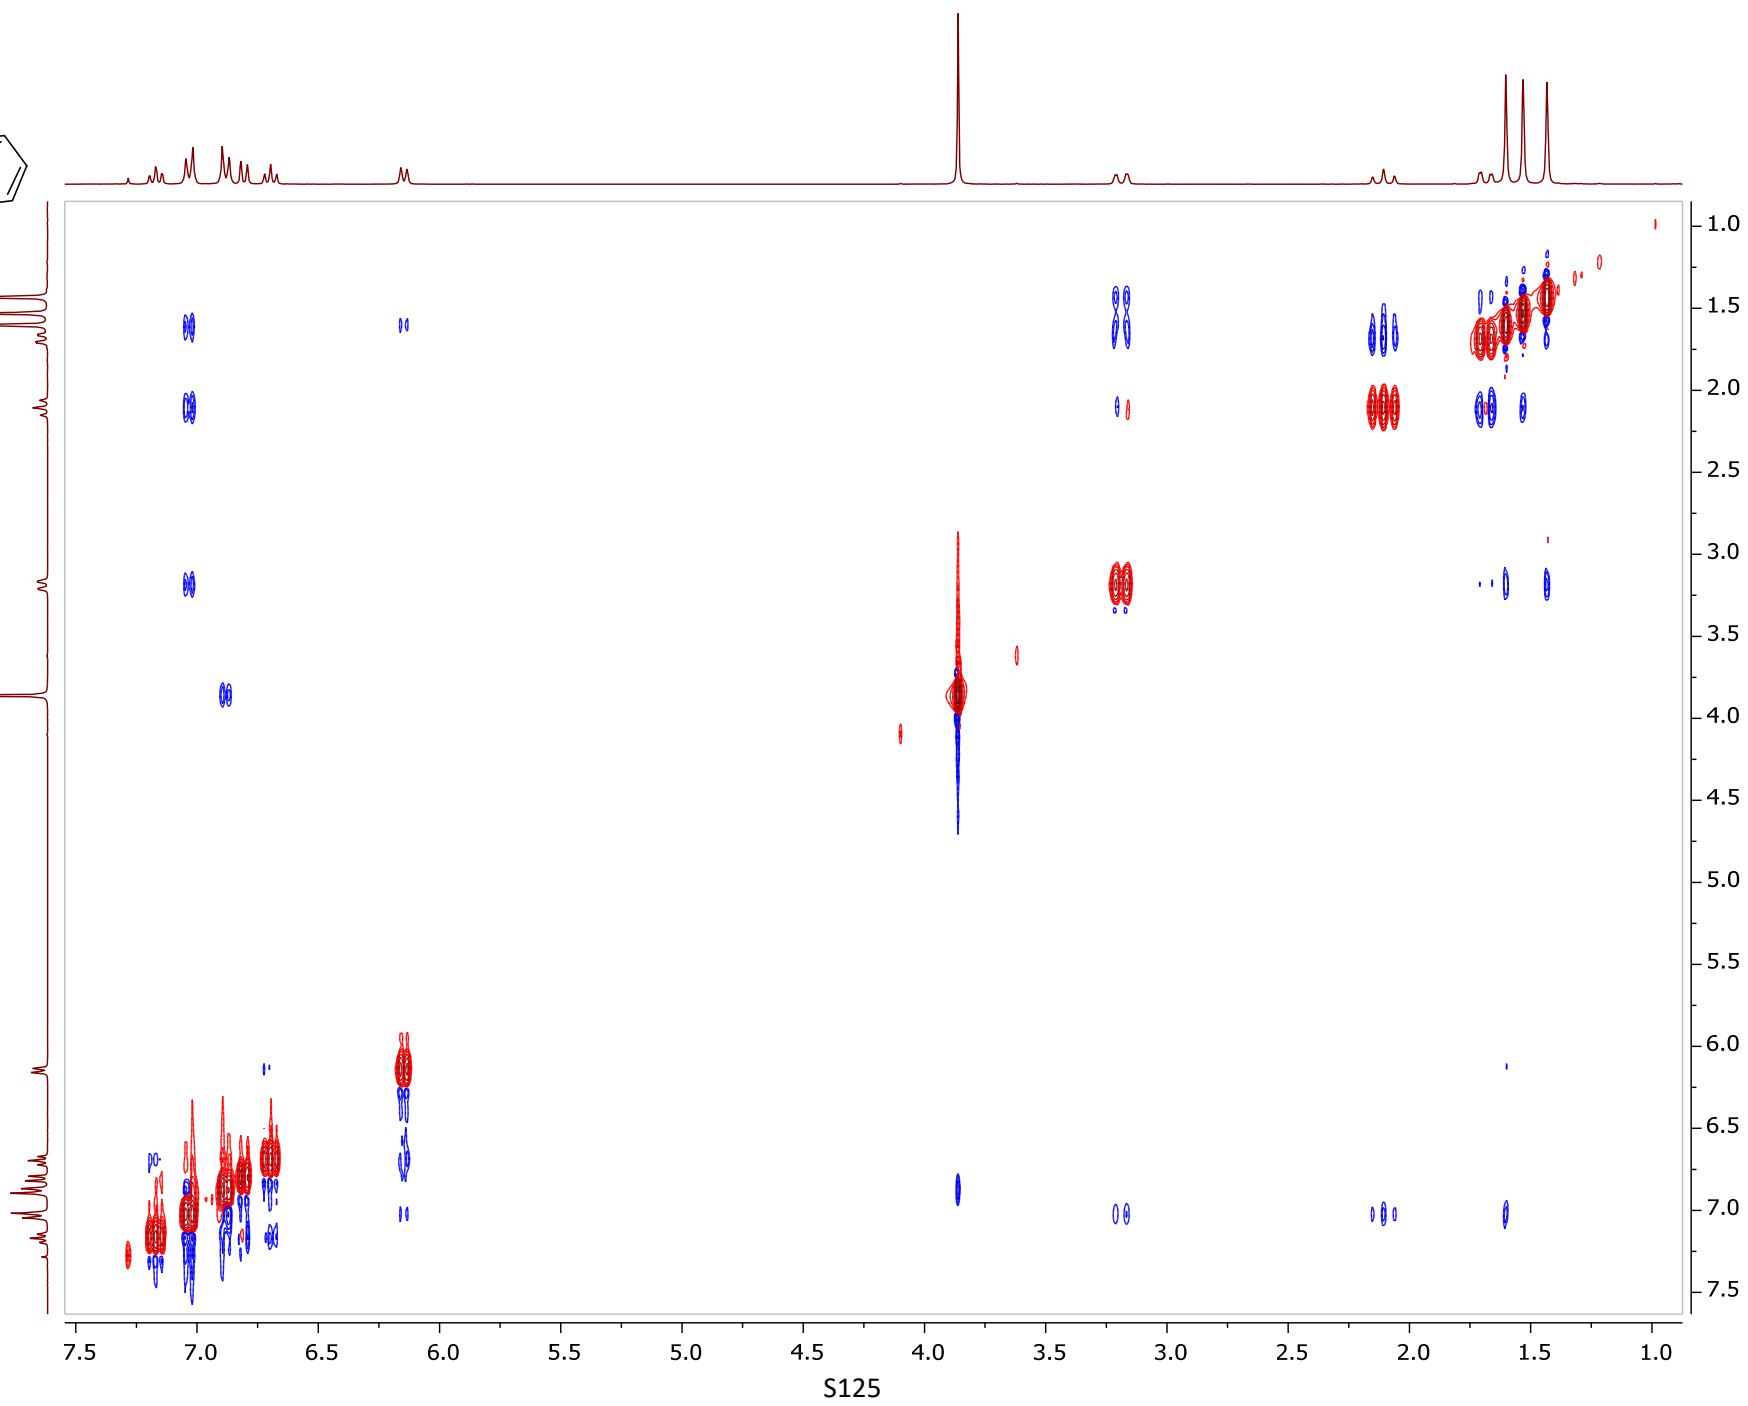

**(4*S*\*,4*aS*\*)-4-(4-Chlorophenyl)-2,2,4*a*-trimethyl-2,3,4,4*a*-tetrahydrobenzo[4,5]isoxazolo[2,3-*b*][1,2]oxazine 5*ba***

<sup>1</sup>H NMR (300 MHz, CDCl<sub>3</sub>)

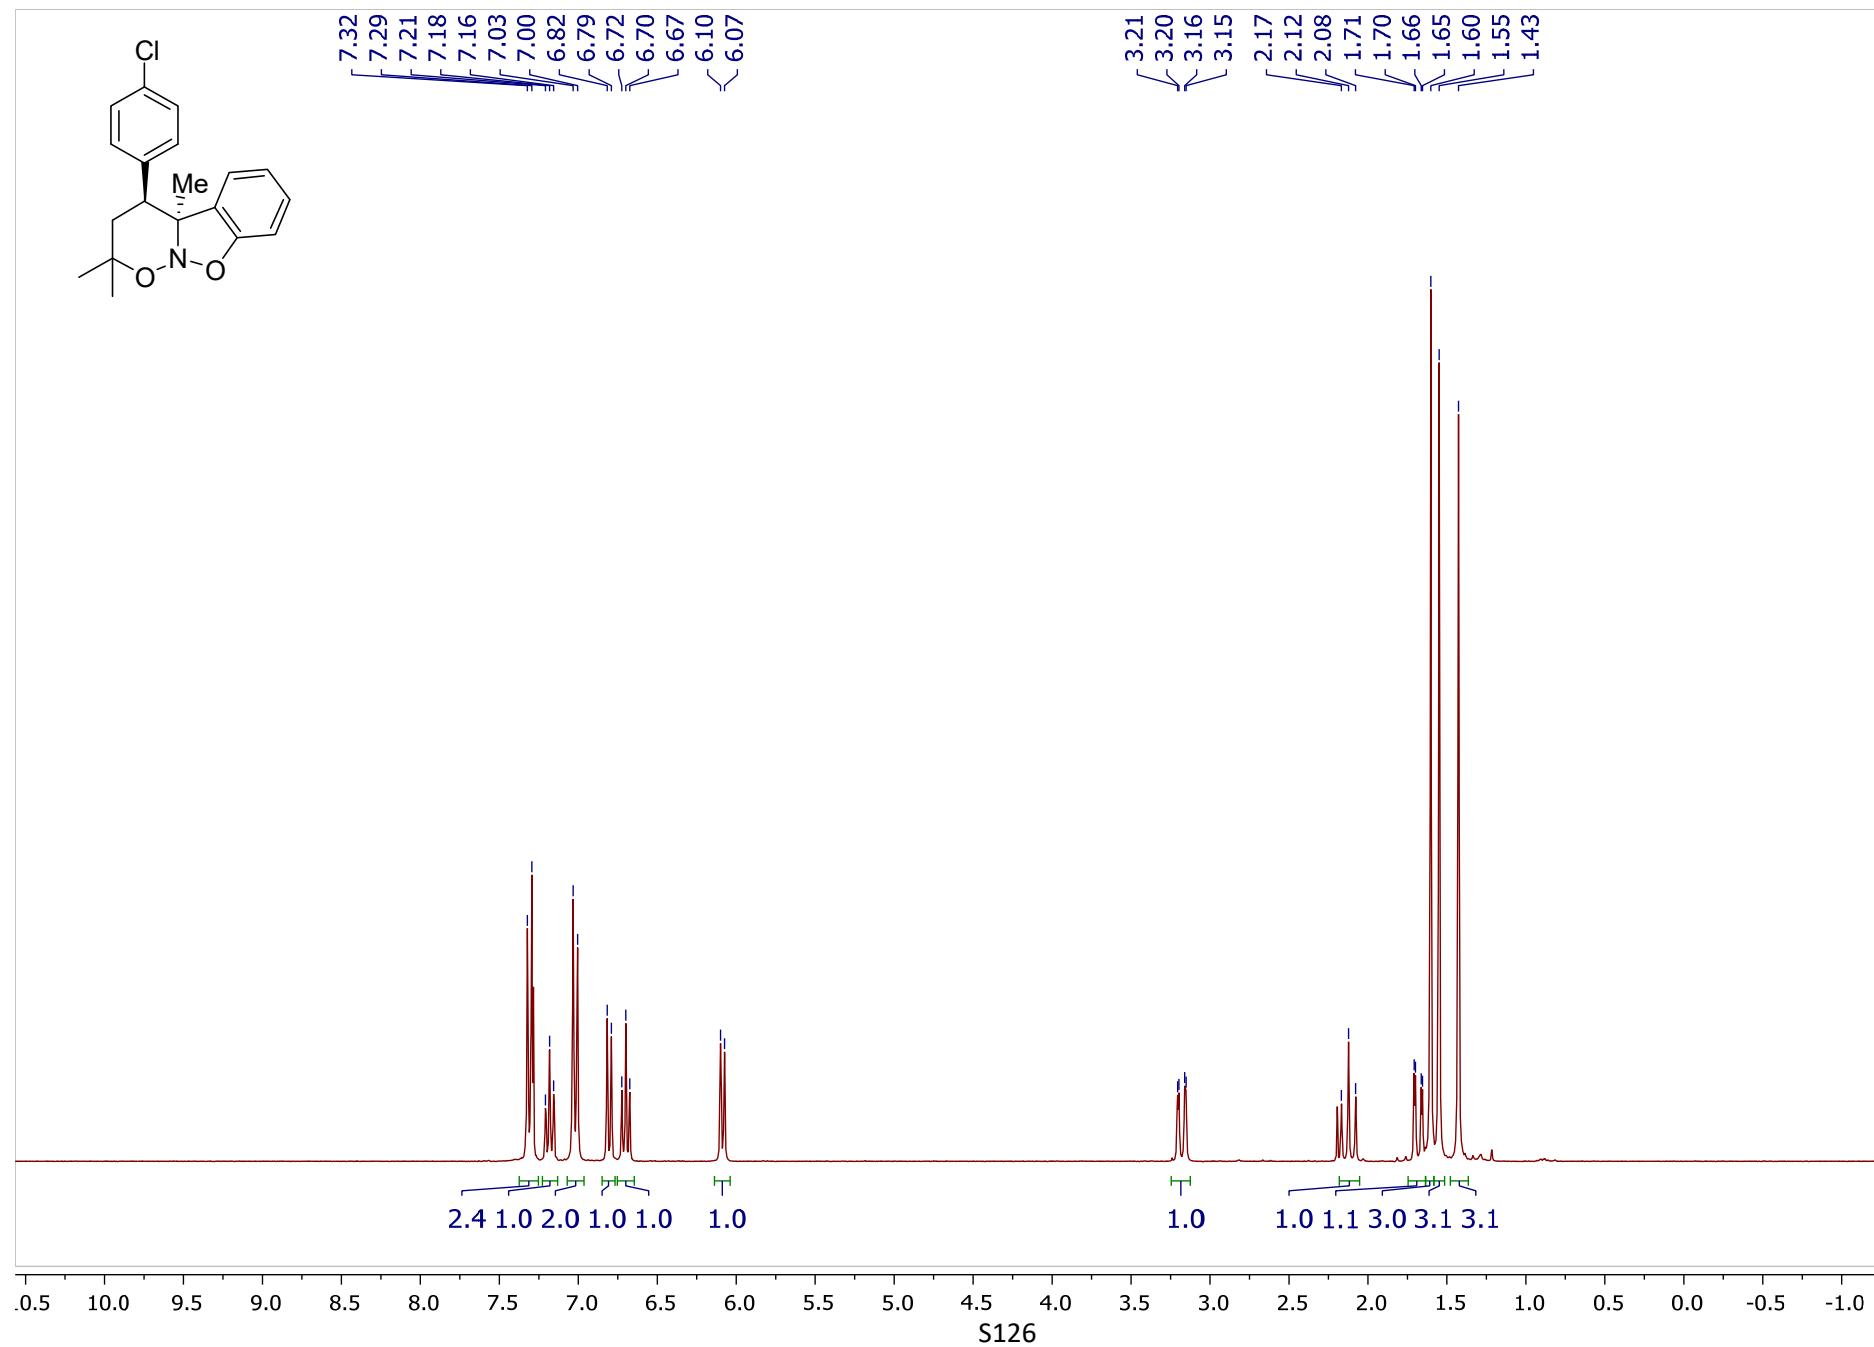

$^{13}\text{C}$  NMR (75 MHz,  $\text{CDCl}_3$ )

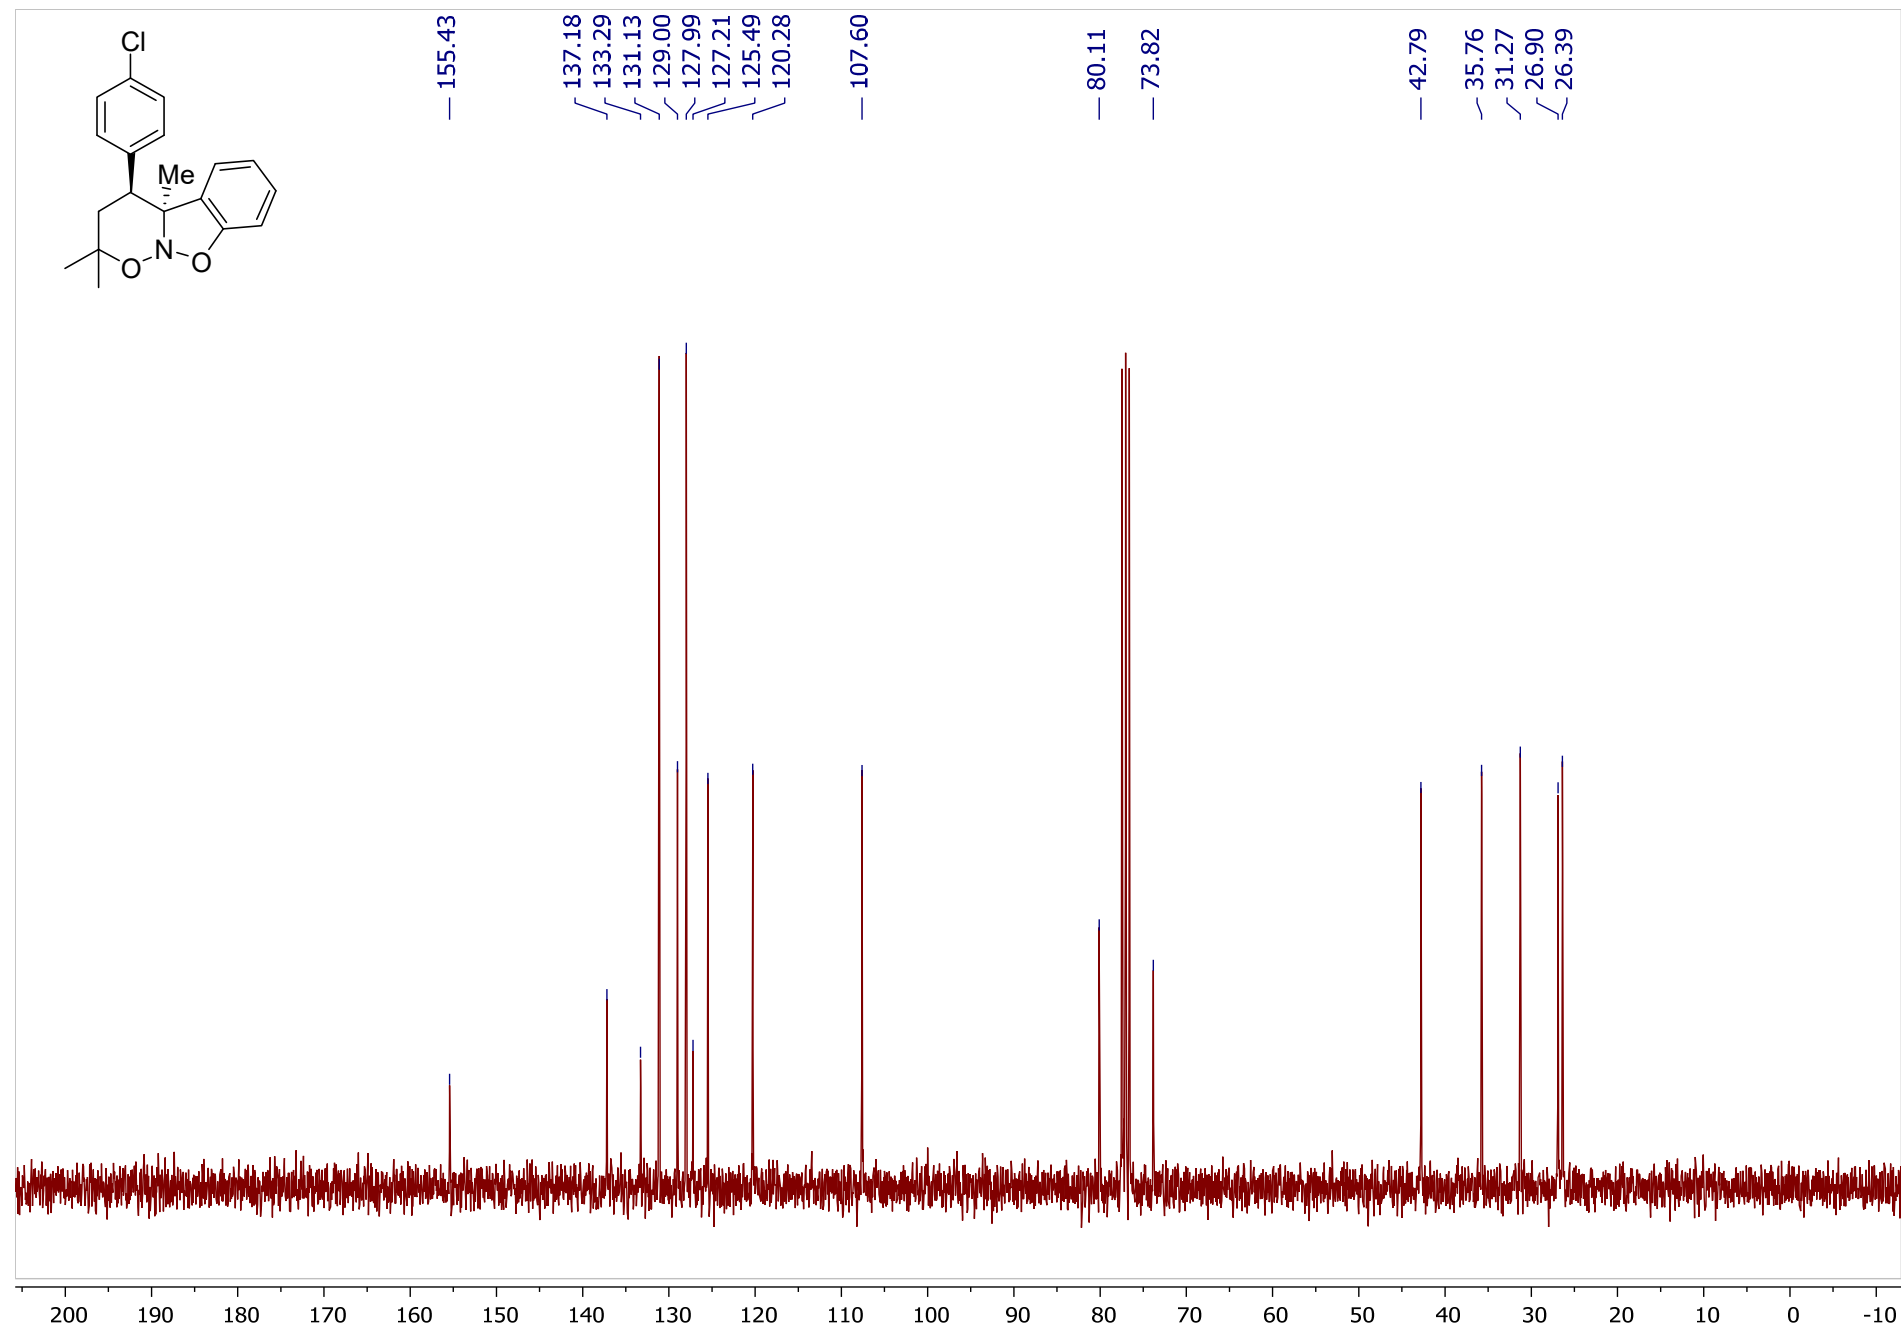

$^{13}\text{C}$  DEPT 135 (75 MHz,  $\text{CDCl}_3$ )

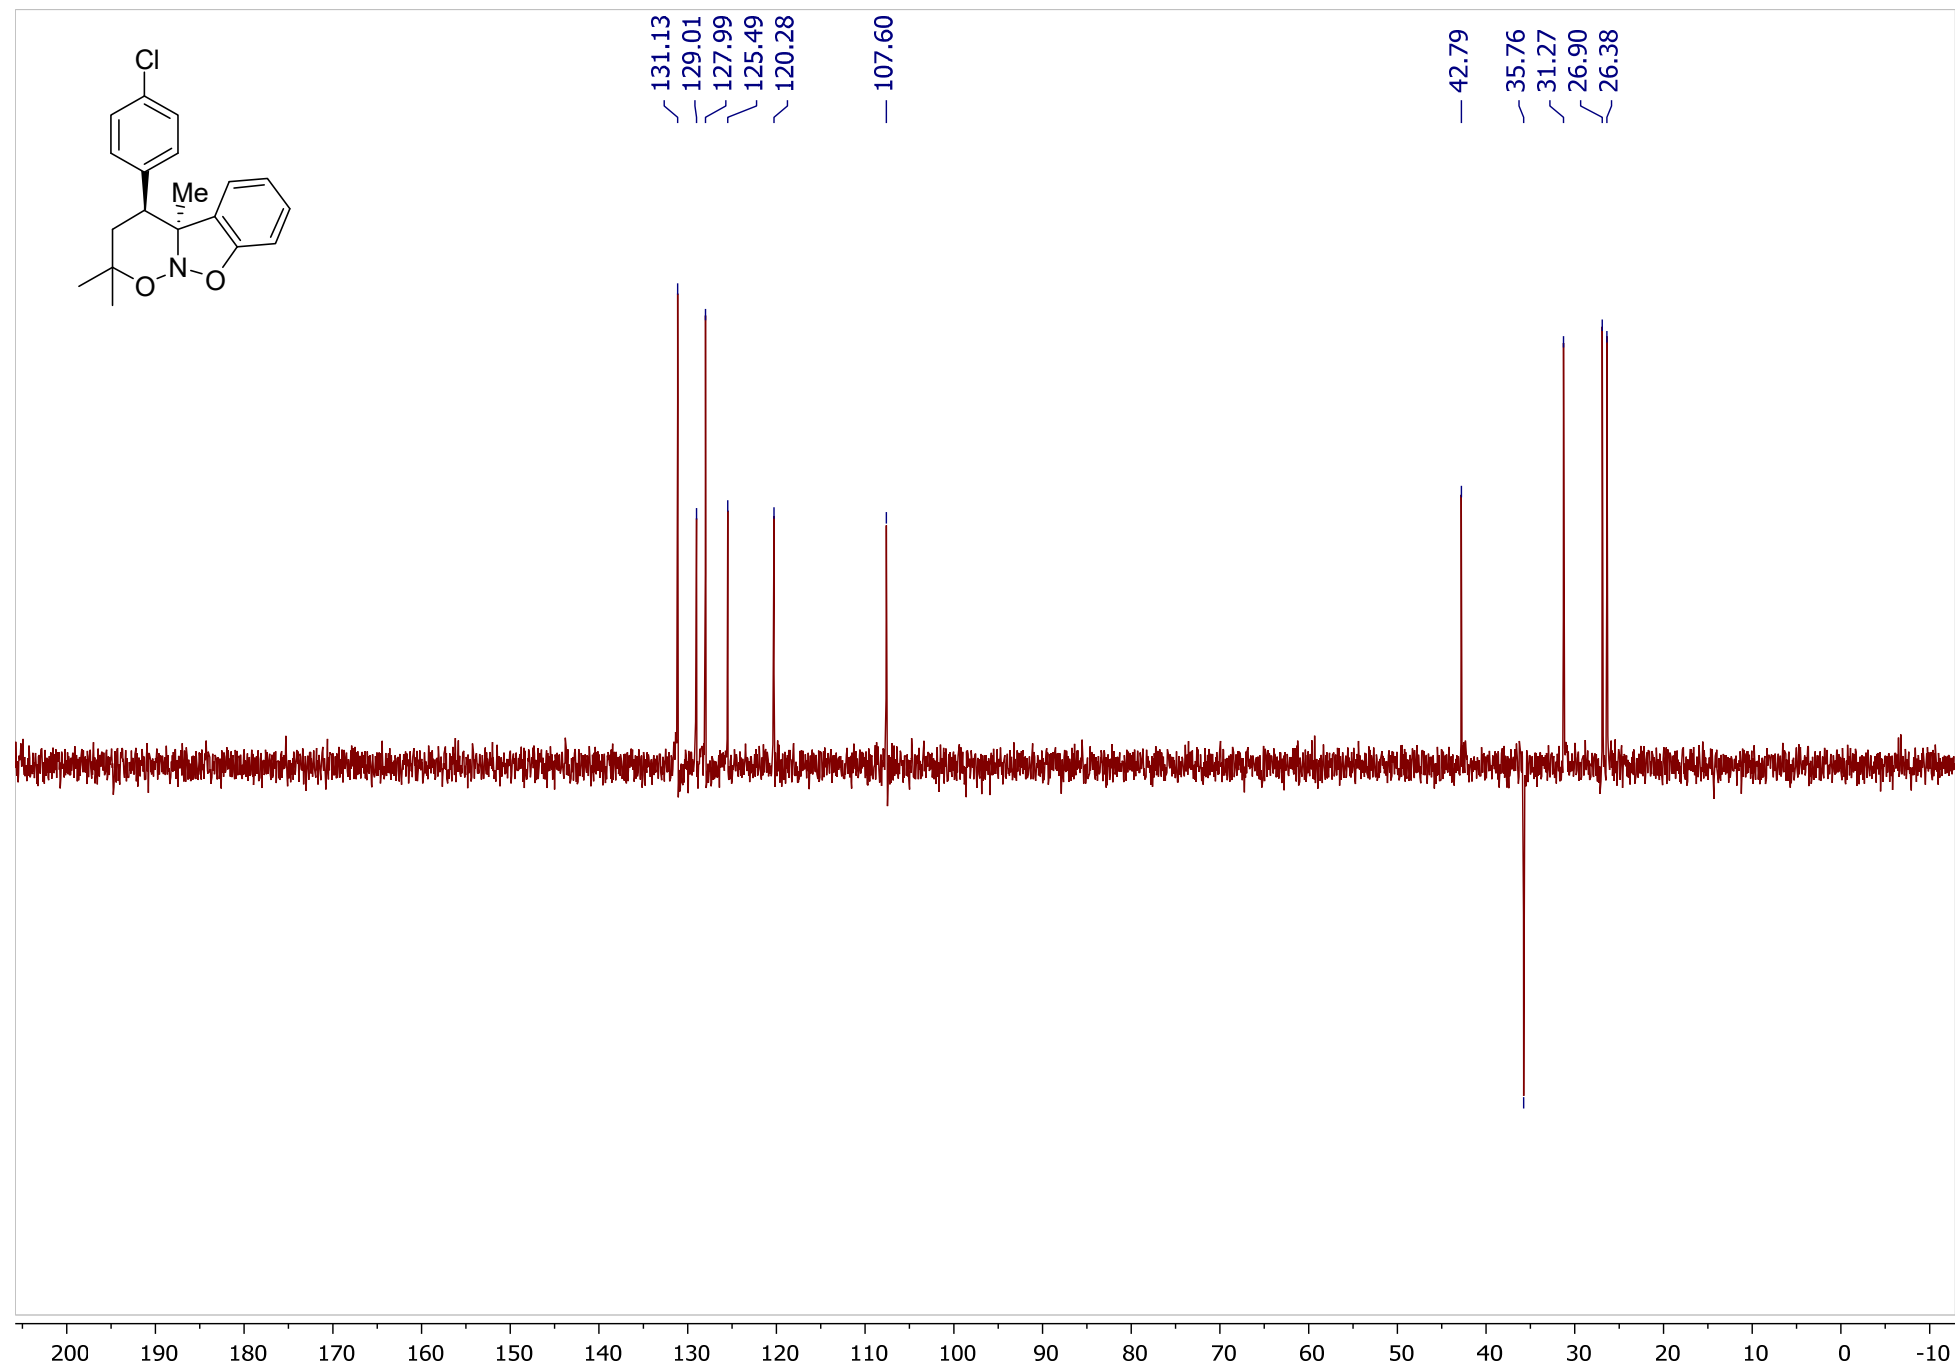



$^1\text{H}$ - $^{13}\text{C}$  HSQC

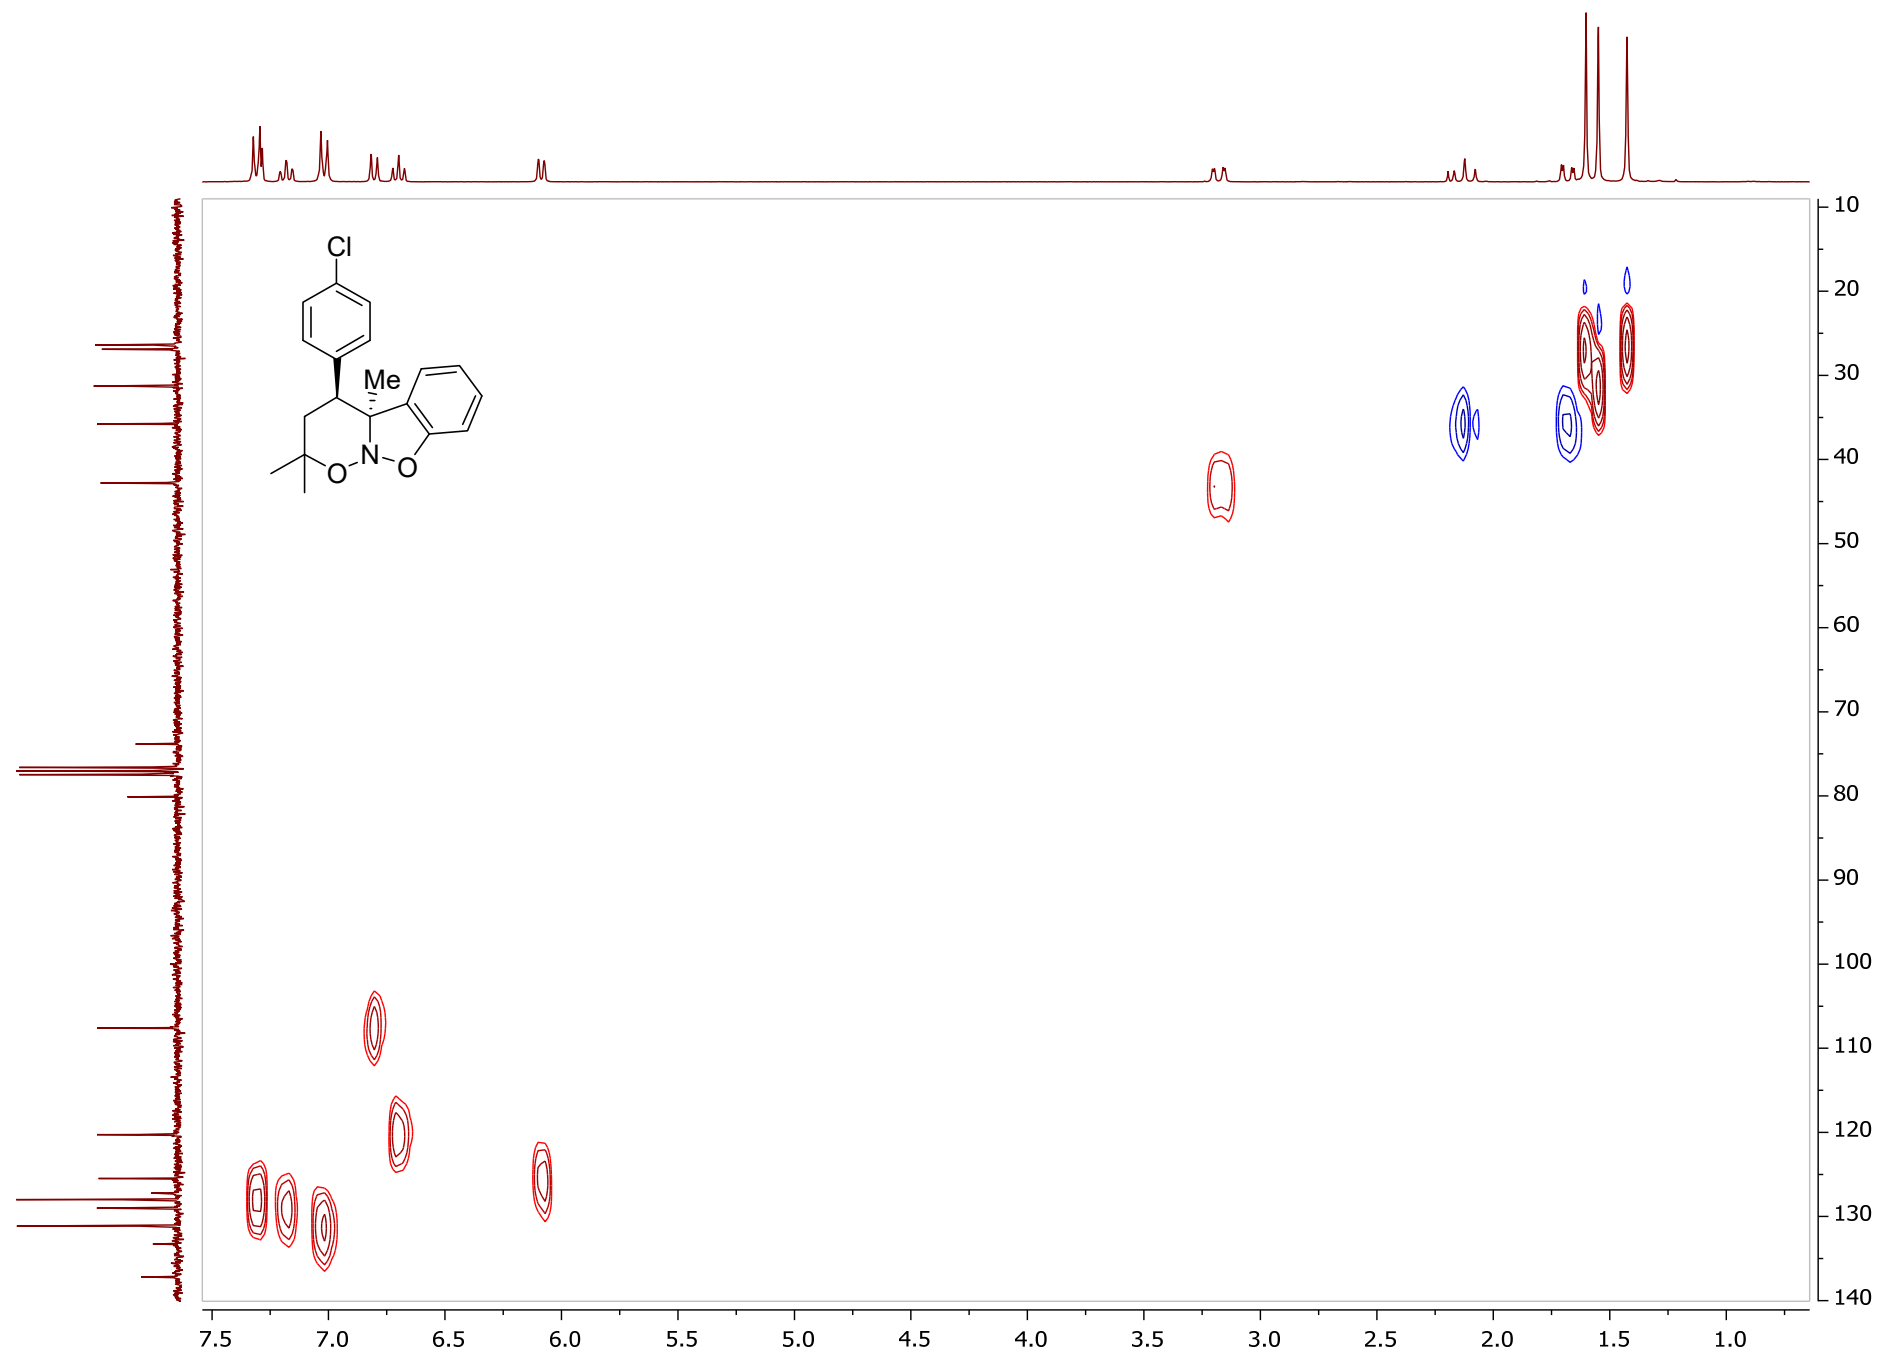

$^1\text{H}$ - $^{13}\text{C}$  HMBC

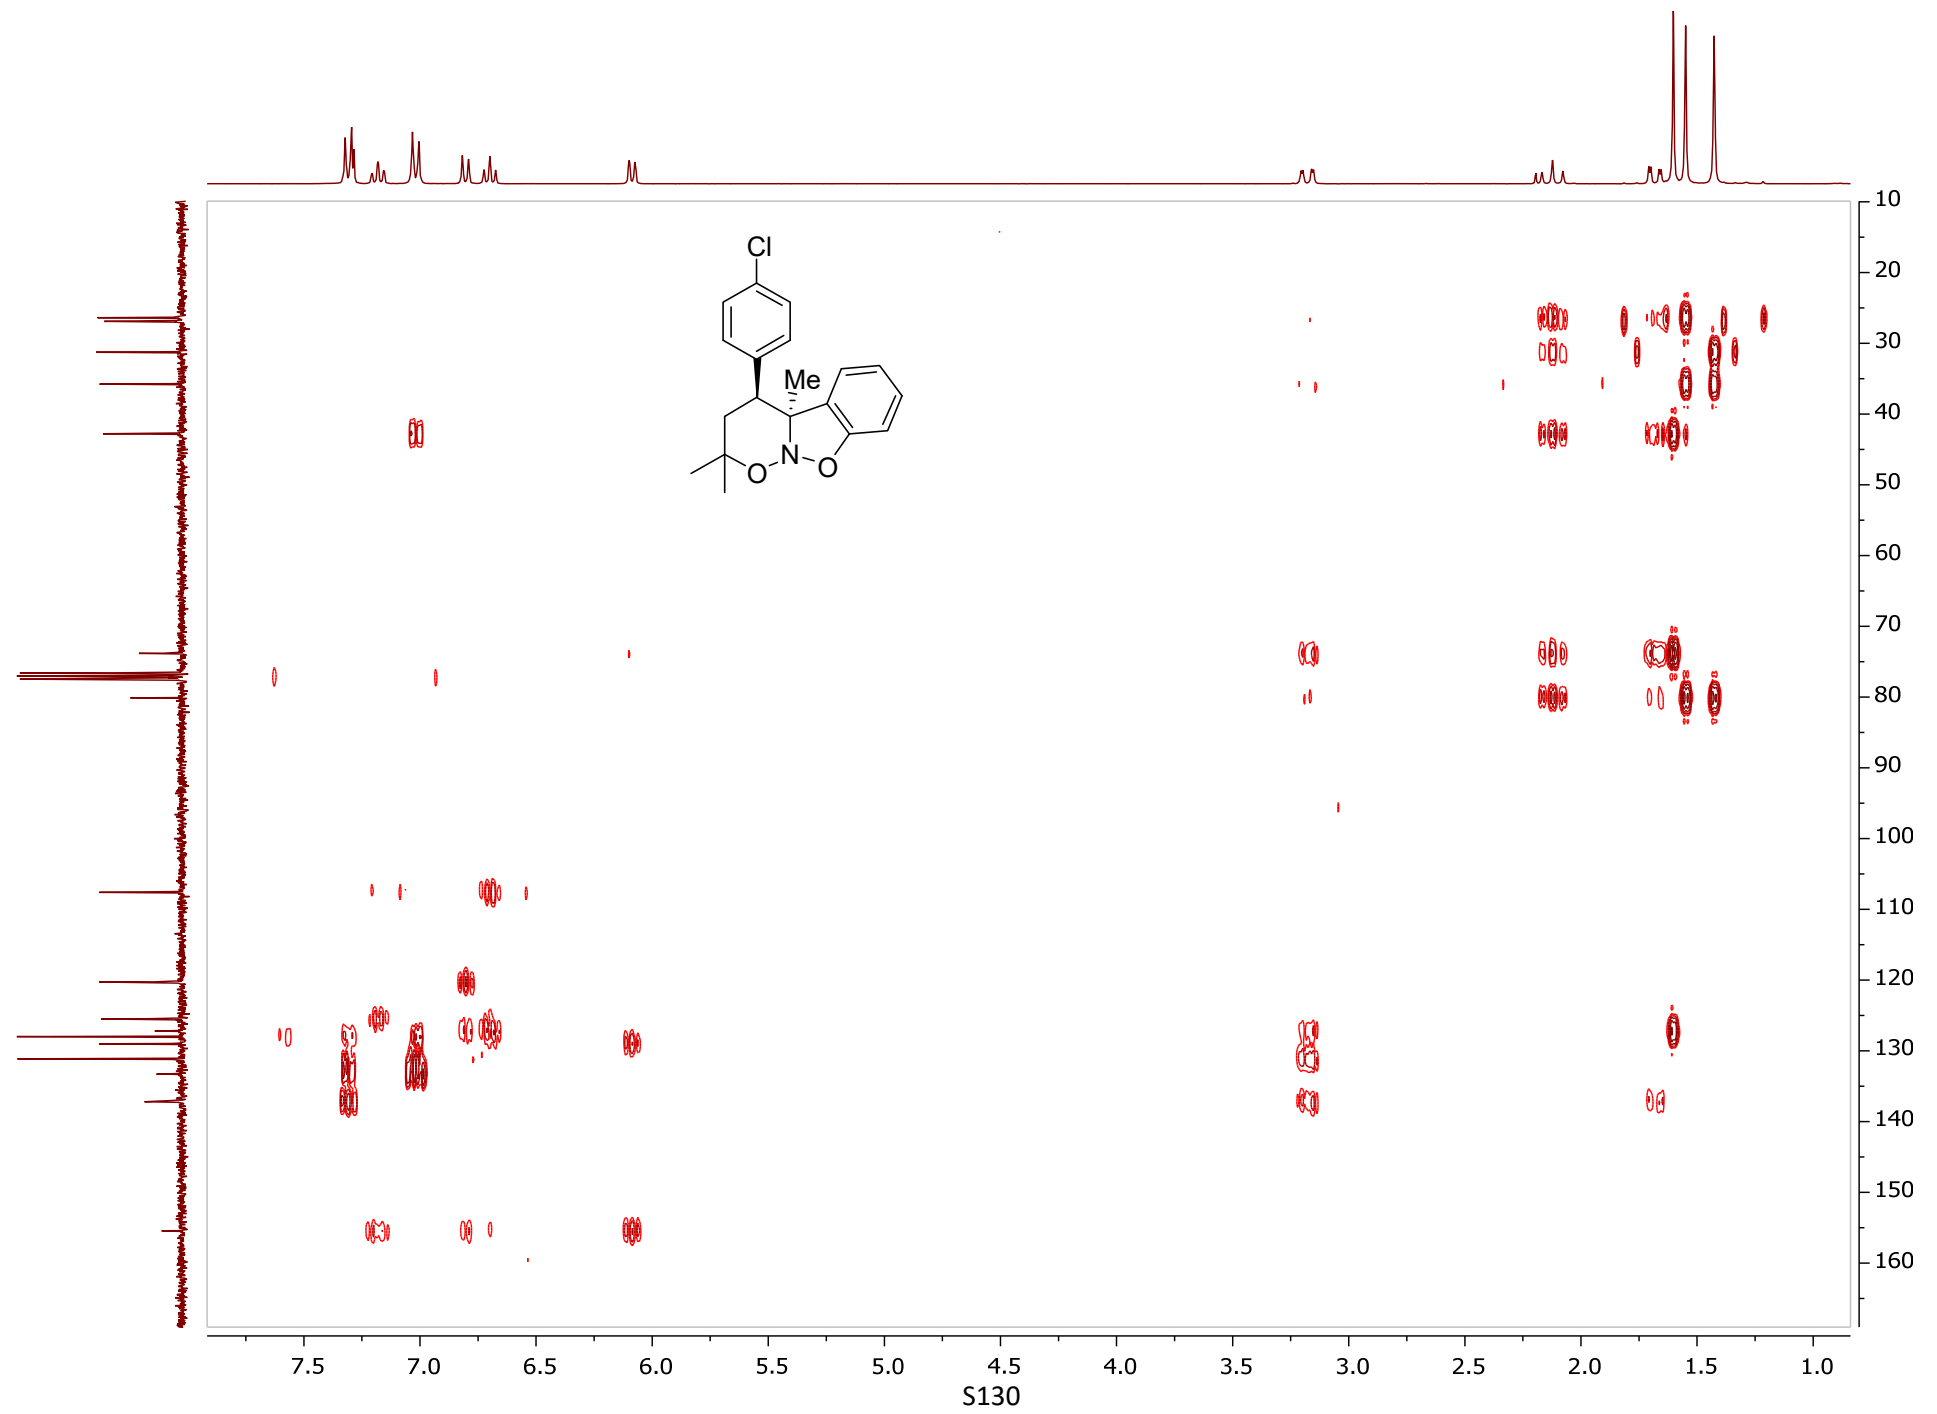

$^1\text{H}$ - $^1\text{H}$  NOESY

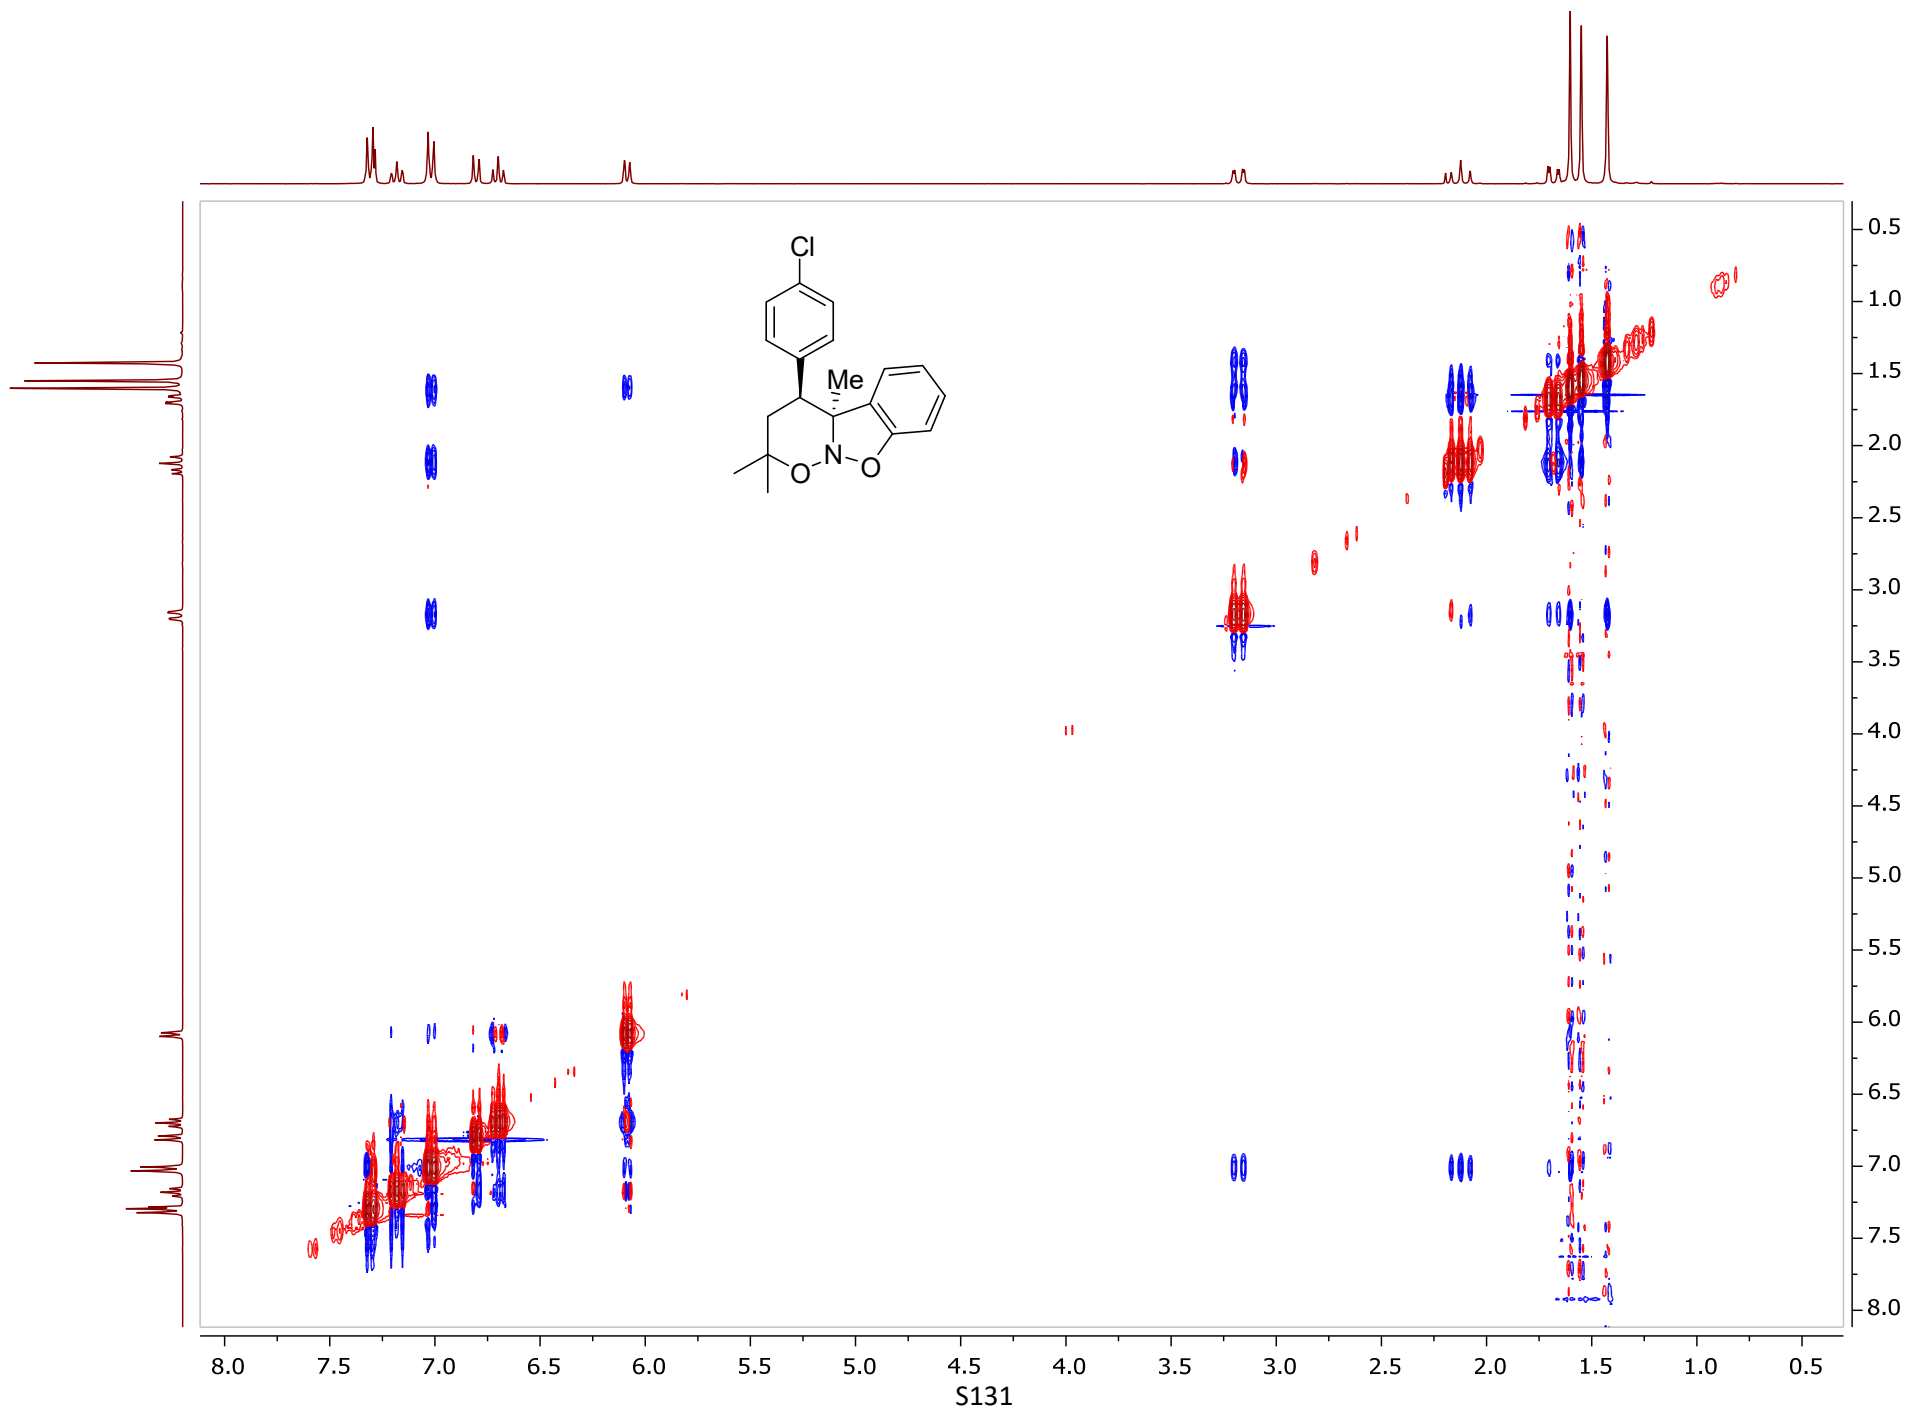

**(4*S*\*,4*aS*\*)-4-(2-Bromophenyl)-2,2,4*a*-trimethyl-2,3,4,4*a*-tetrahydrobenzo[4,5]isoxazolo[2,3-*b*][1,2]oxazine 5*c*<sub>a</sub>**

<sup>1</sup>H NMR (300 MHz, CDCl<sub>3</sub>)

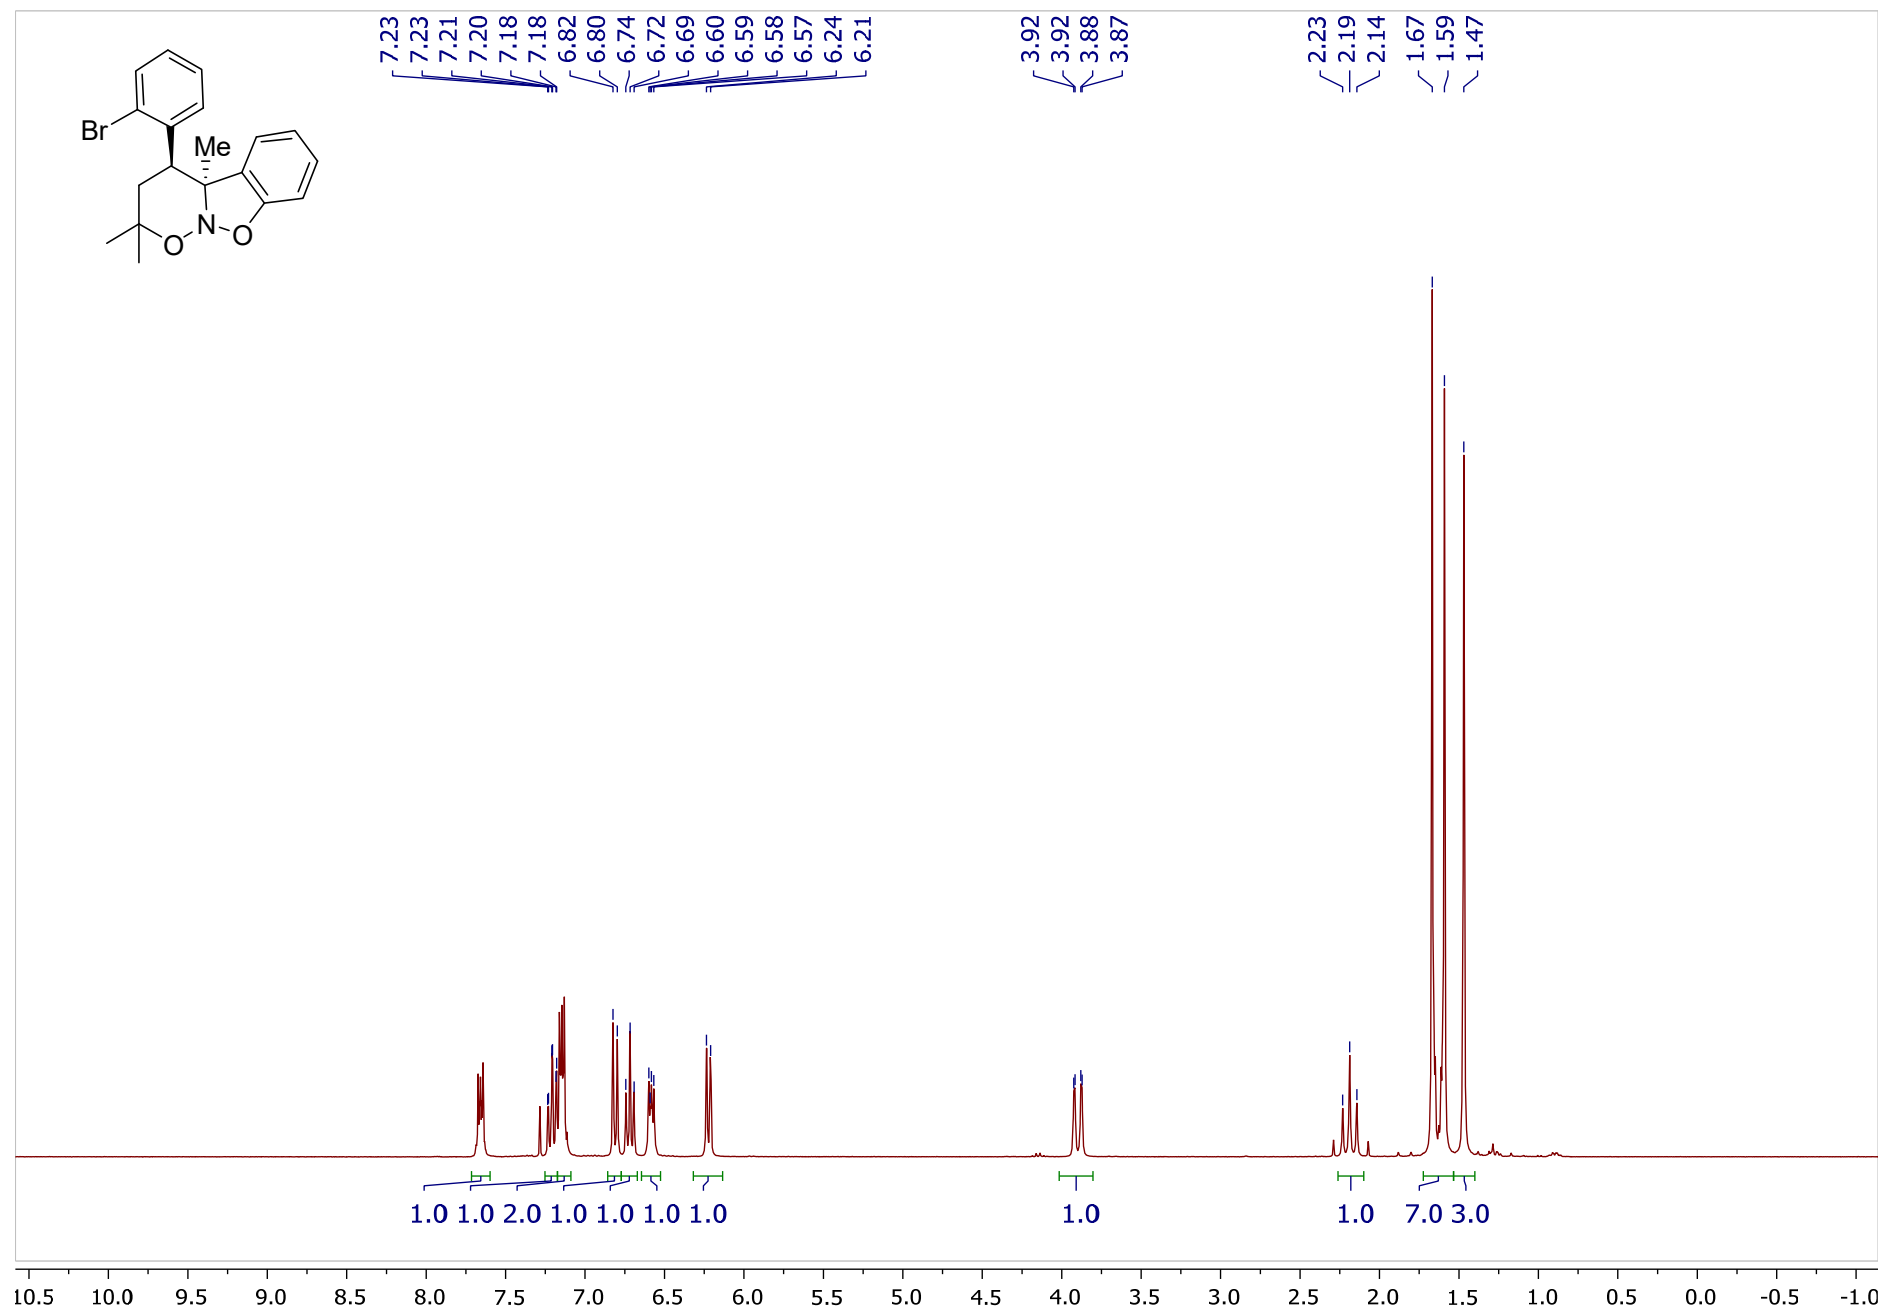

<sup>13</sup>C NMR (75 MHz, CDCl<sub>3</sub>)

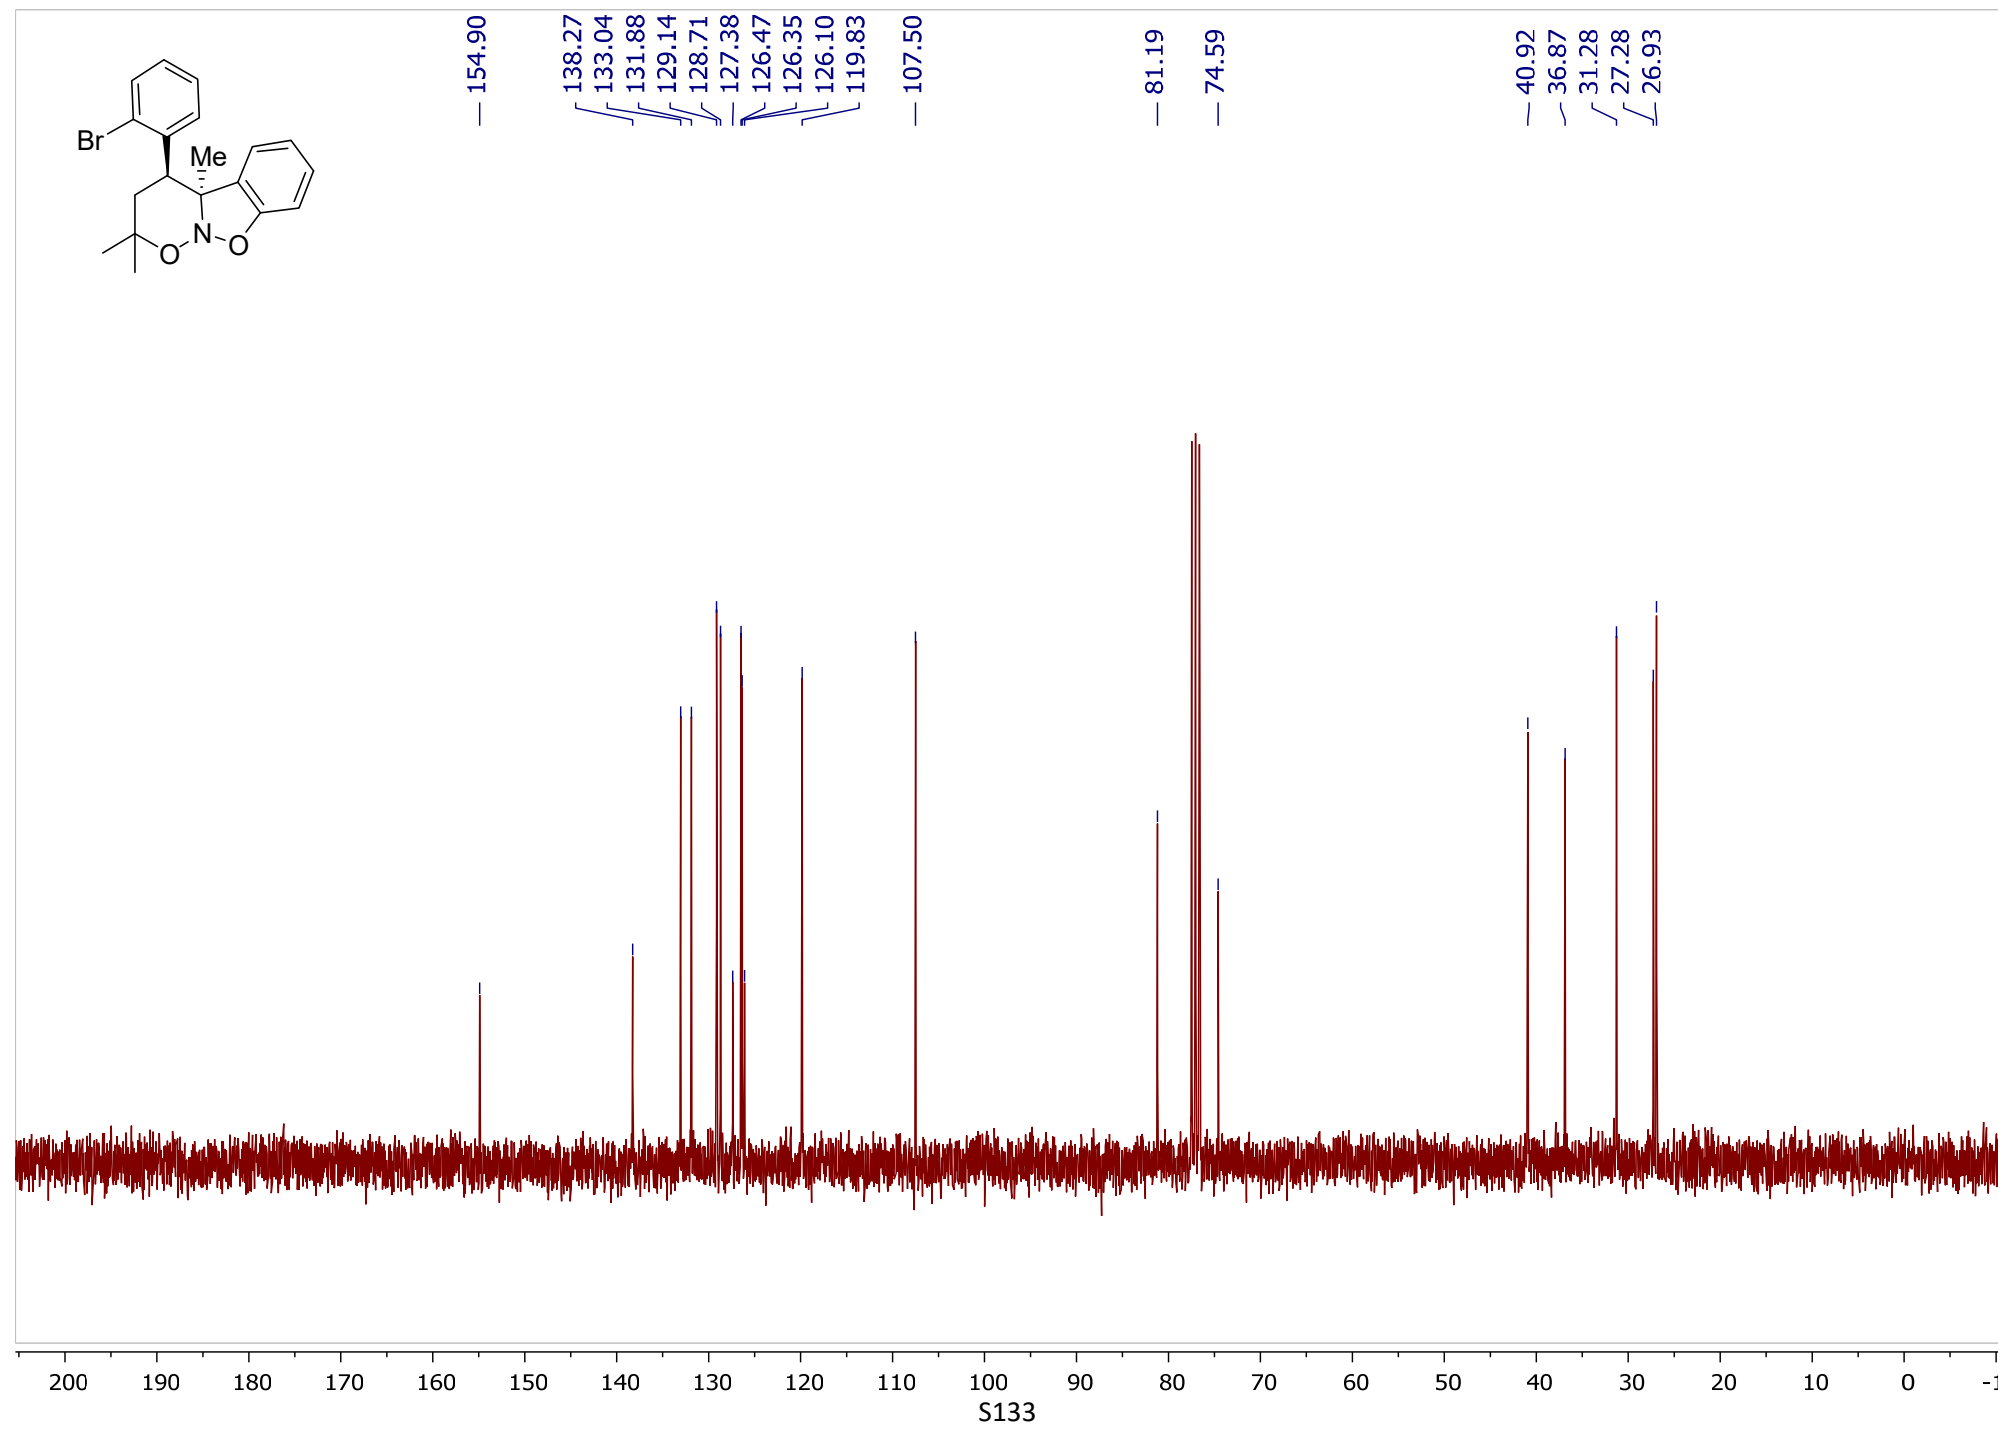

$^{13}\text{C}$  DEPT 135 (75 MHz,  $\text{CDCl}_3$ )

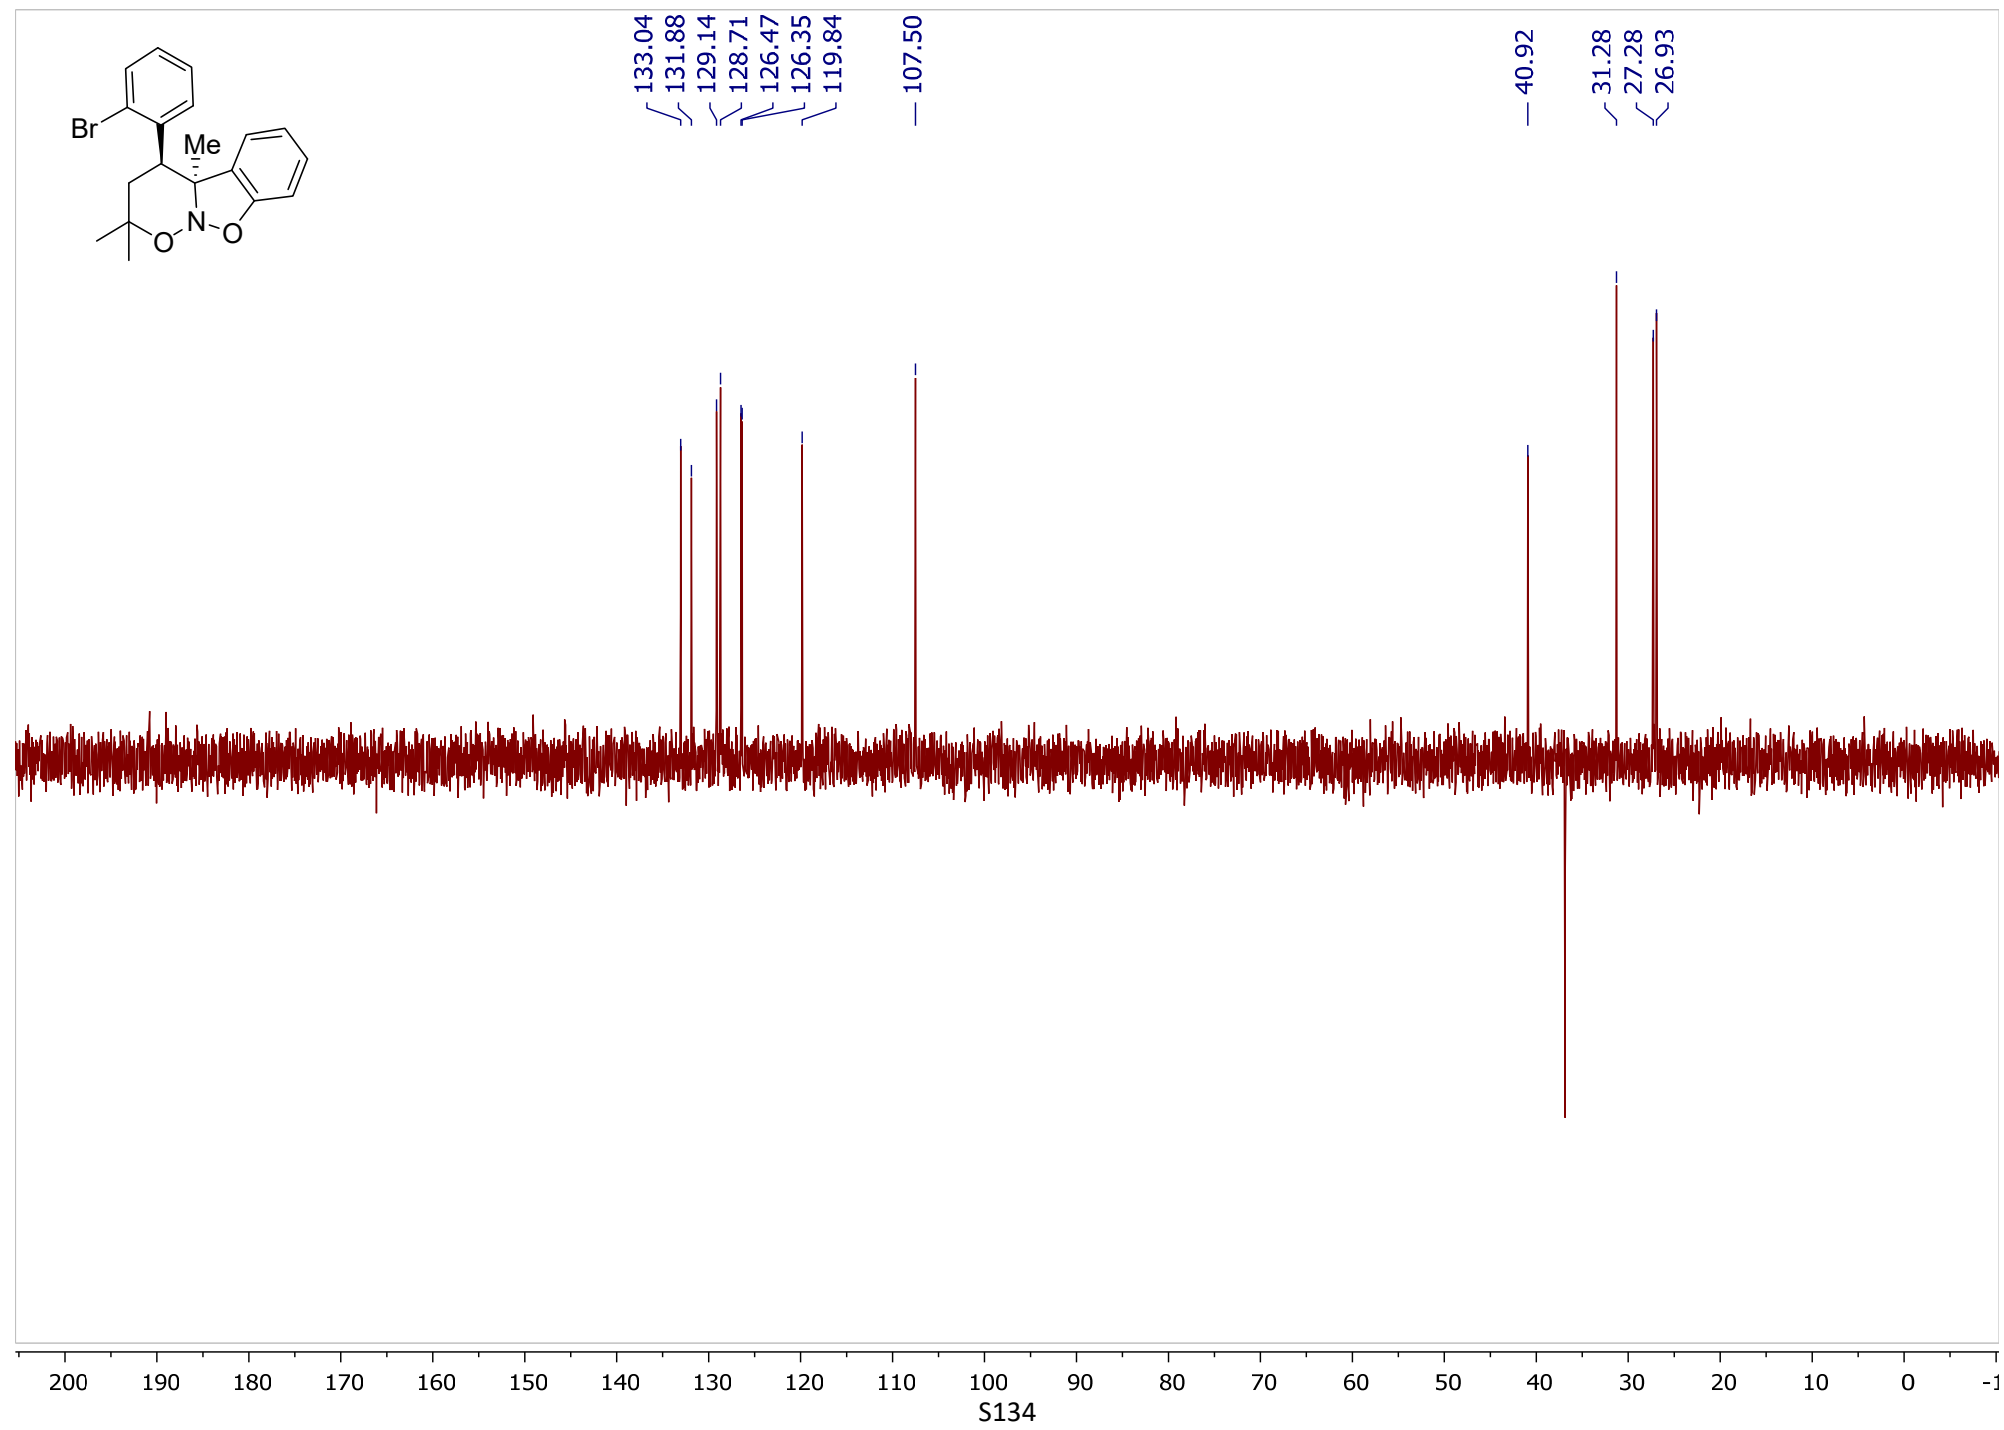

$^1\text{H}$ - $^1\text{H}$  COSY

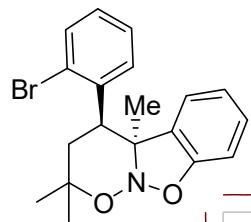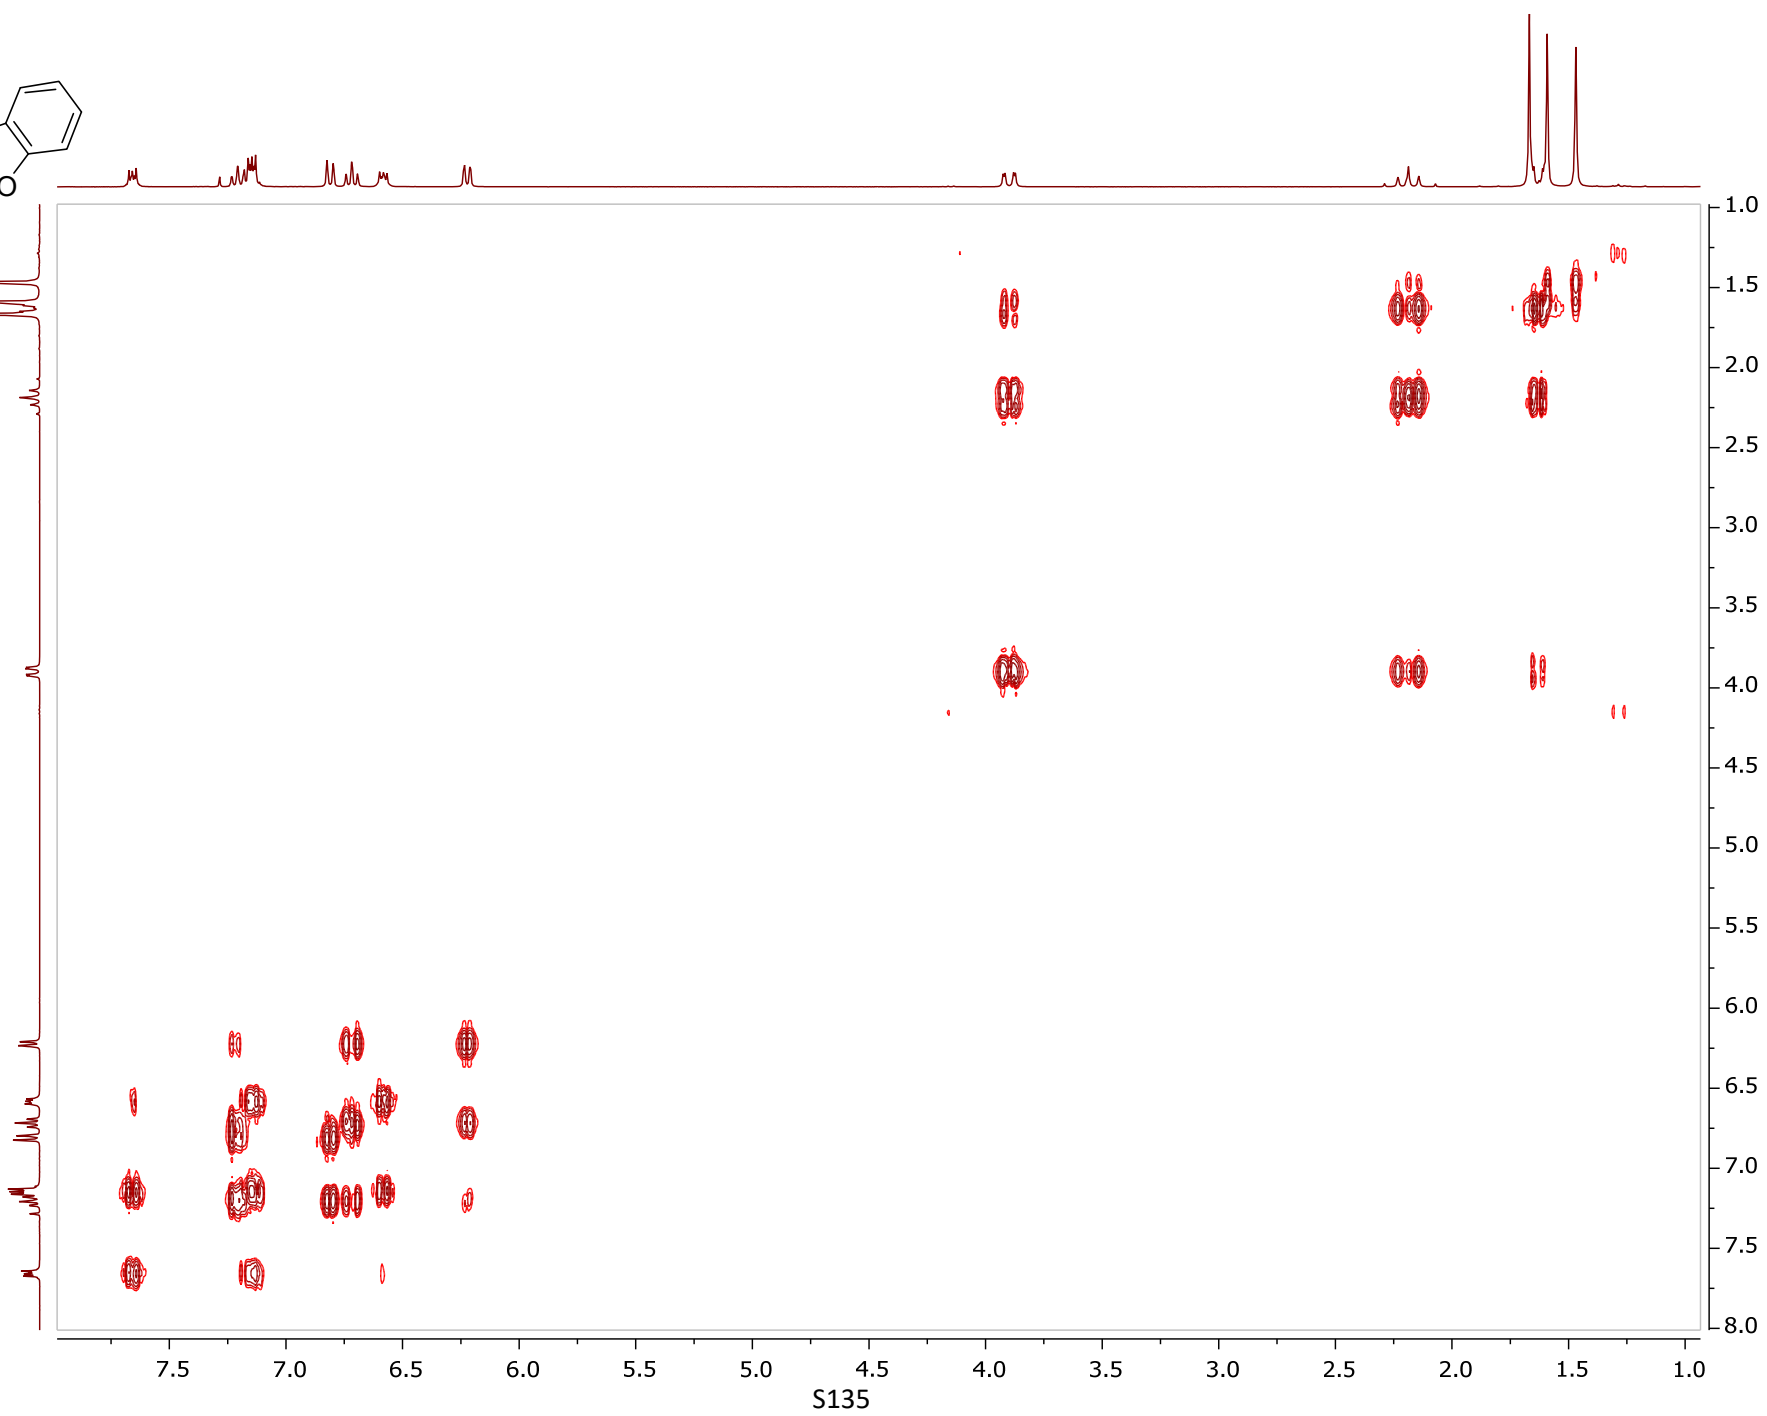

$^1\text{H}$ - $^{13}\text{C}$  HSQC

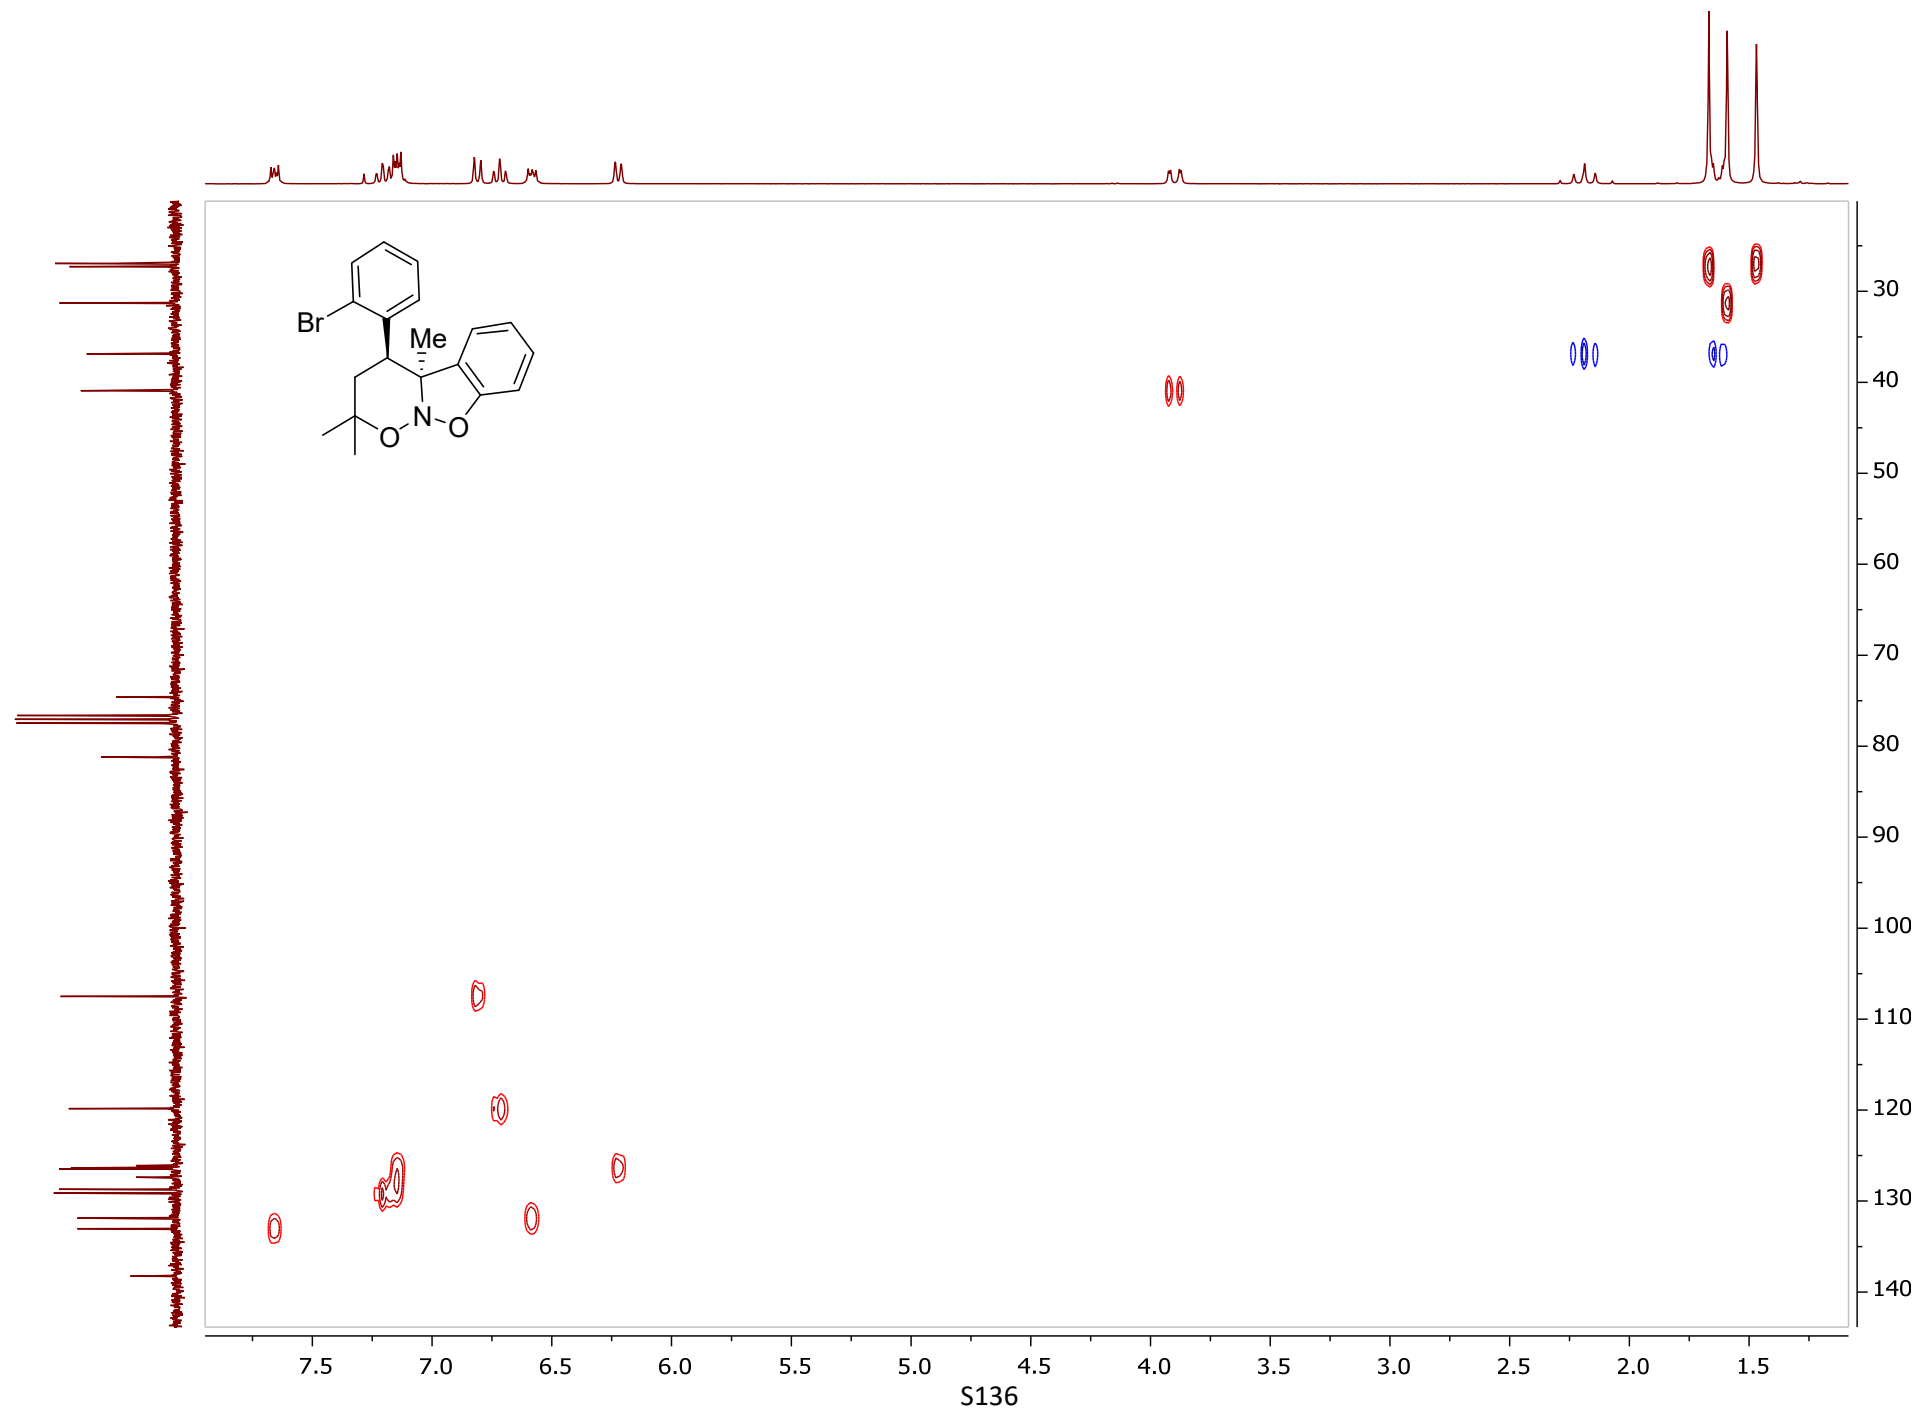



$^1\text{H}$ - $^{13}\text{C}$  HMBC

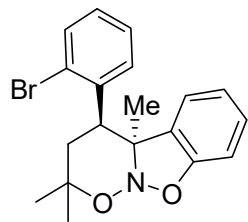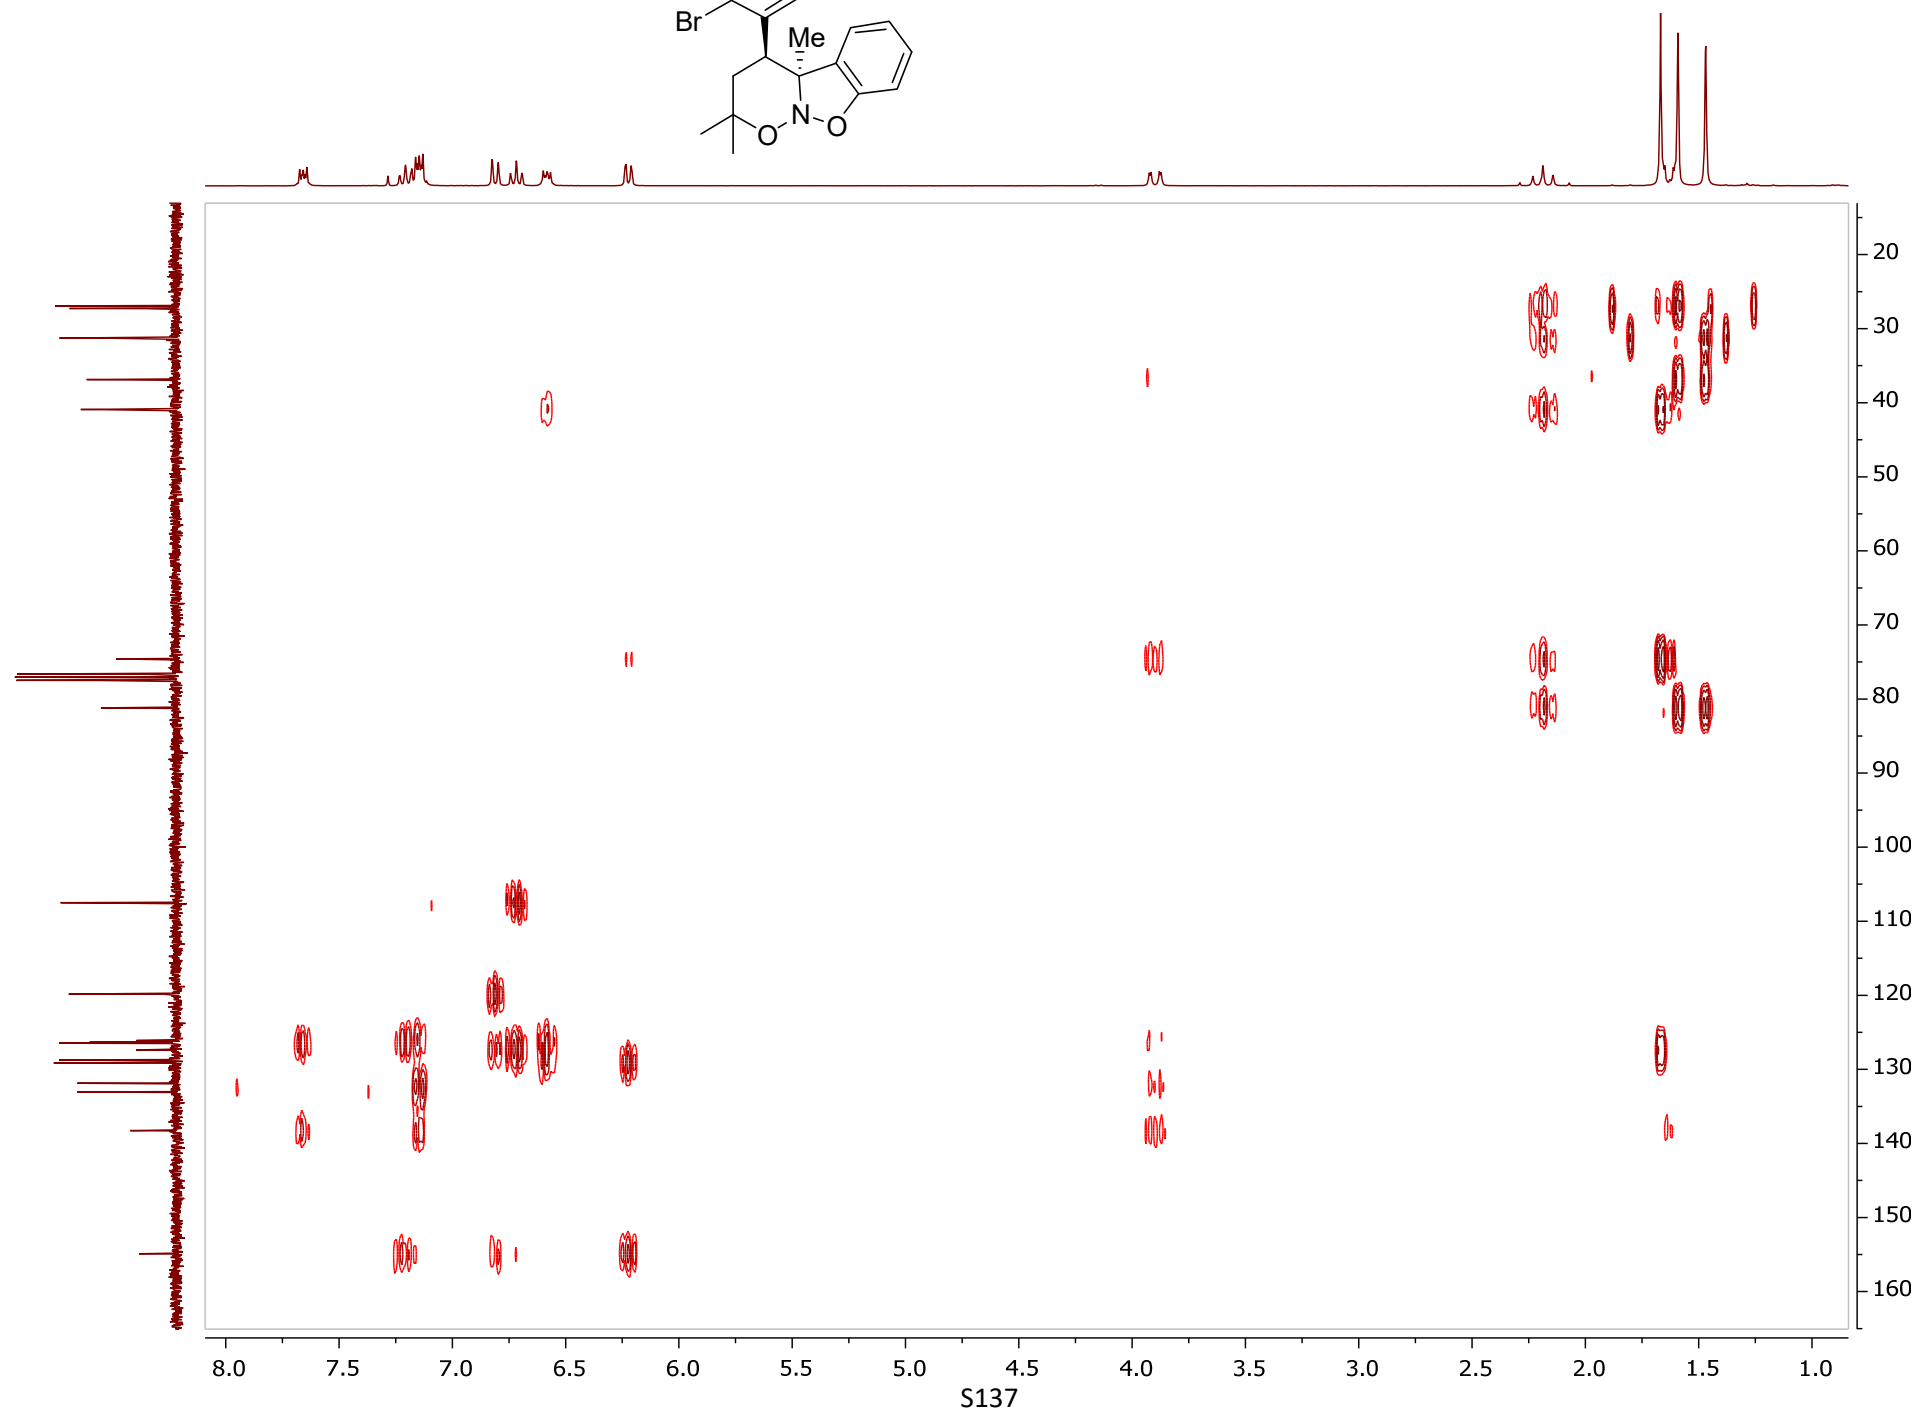

**(4*R*\*,4*aS*\*)-2,2,4,4a-Tetramethyl-2,3,4,4a-tetrahydrobenzo[4,5]isoxazolo[2,3-b][1,2]oxazine 5da**

<sup>1</sup>H NMR (300 MHz, CDCl<sub>3</sub>)

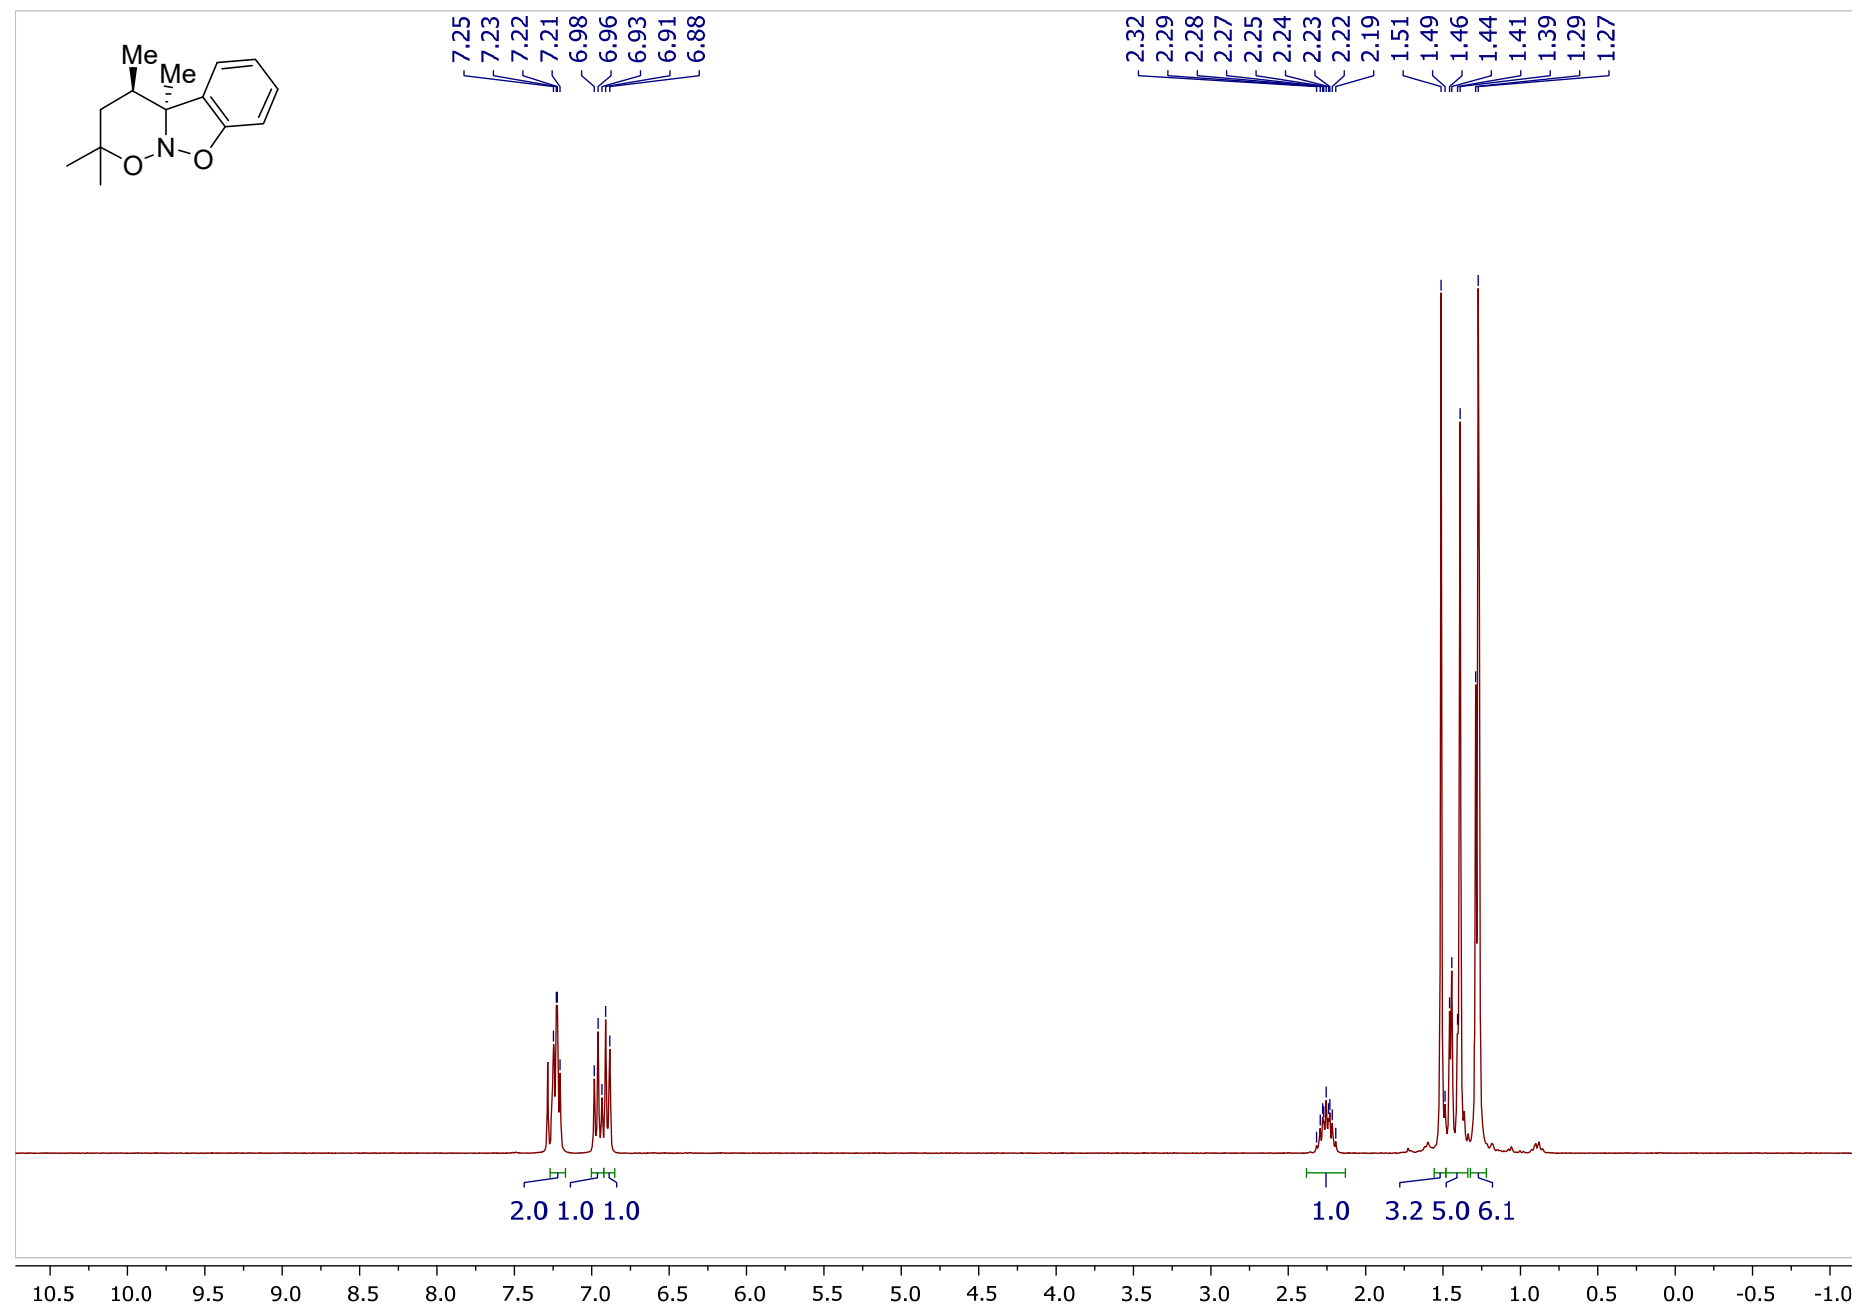

<sup>13</sup>C NMR (75 MHz, CDCl<sub>3</sub>)

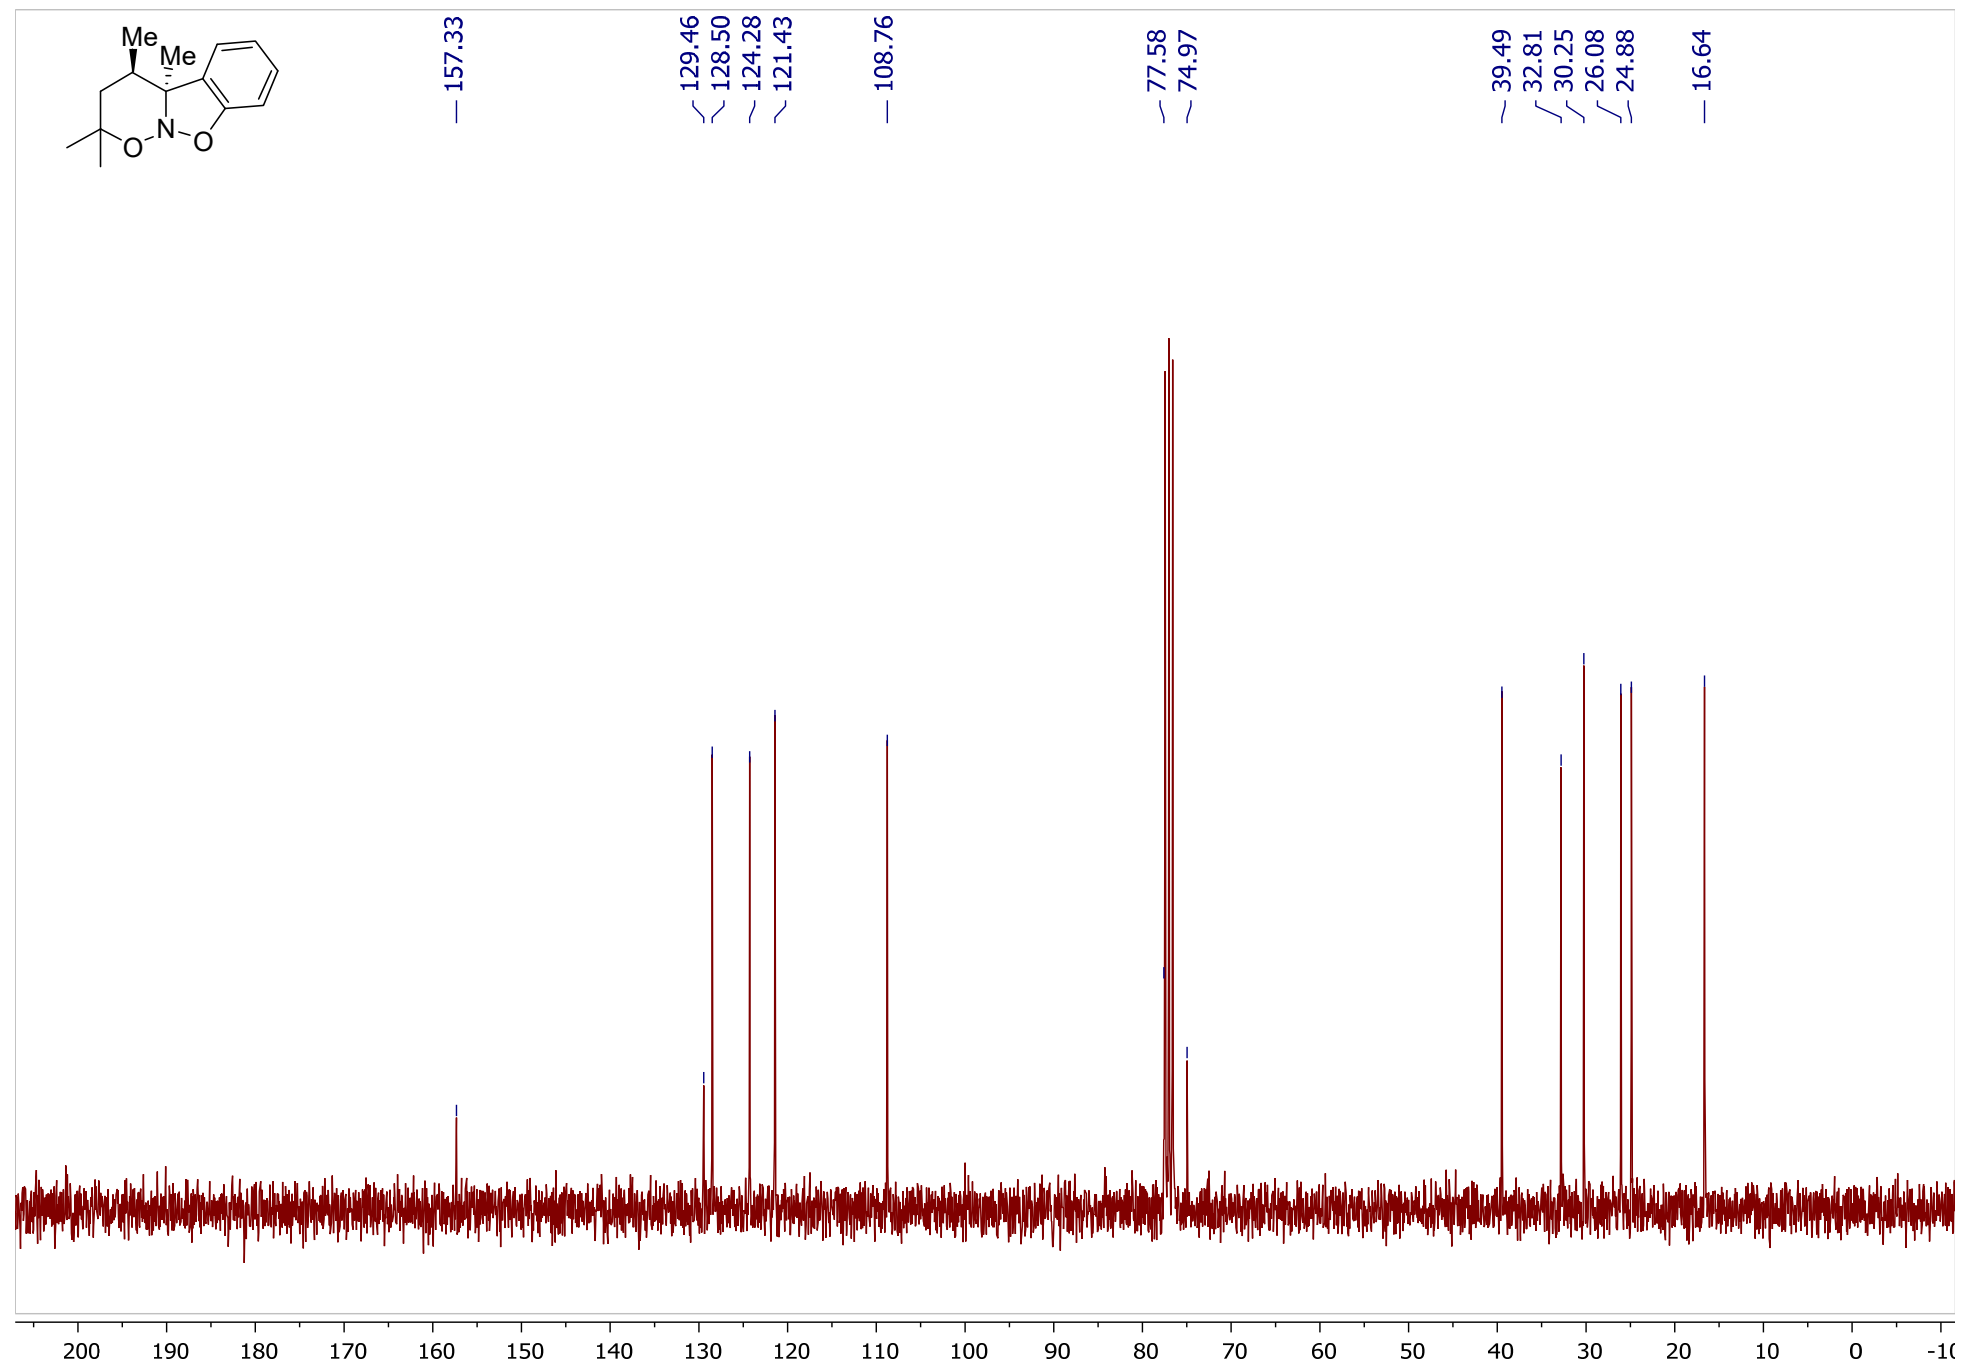

$^{13}\text{C}$  DEPT 135 (75 MHz,  $\text{CDCl}_3$ )

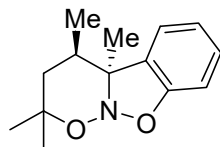

— 128.50  
— 124.28

— 39.49  
— 32.82  
— 30.25  
— 26.08  
— 24.88  
— 16.64

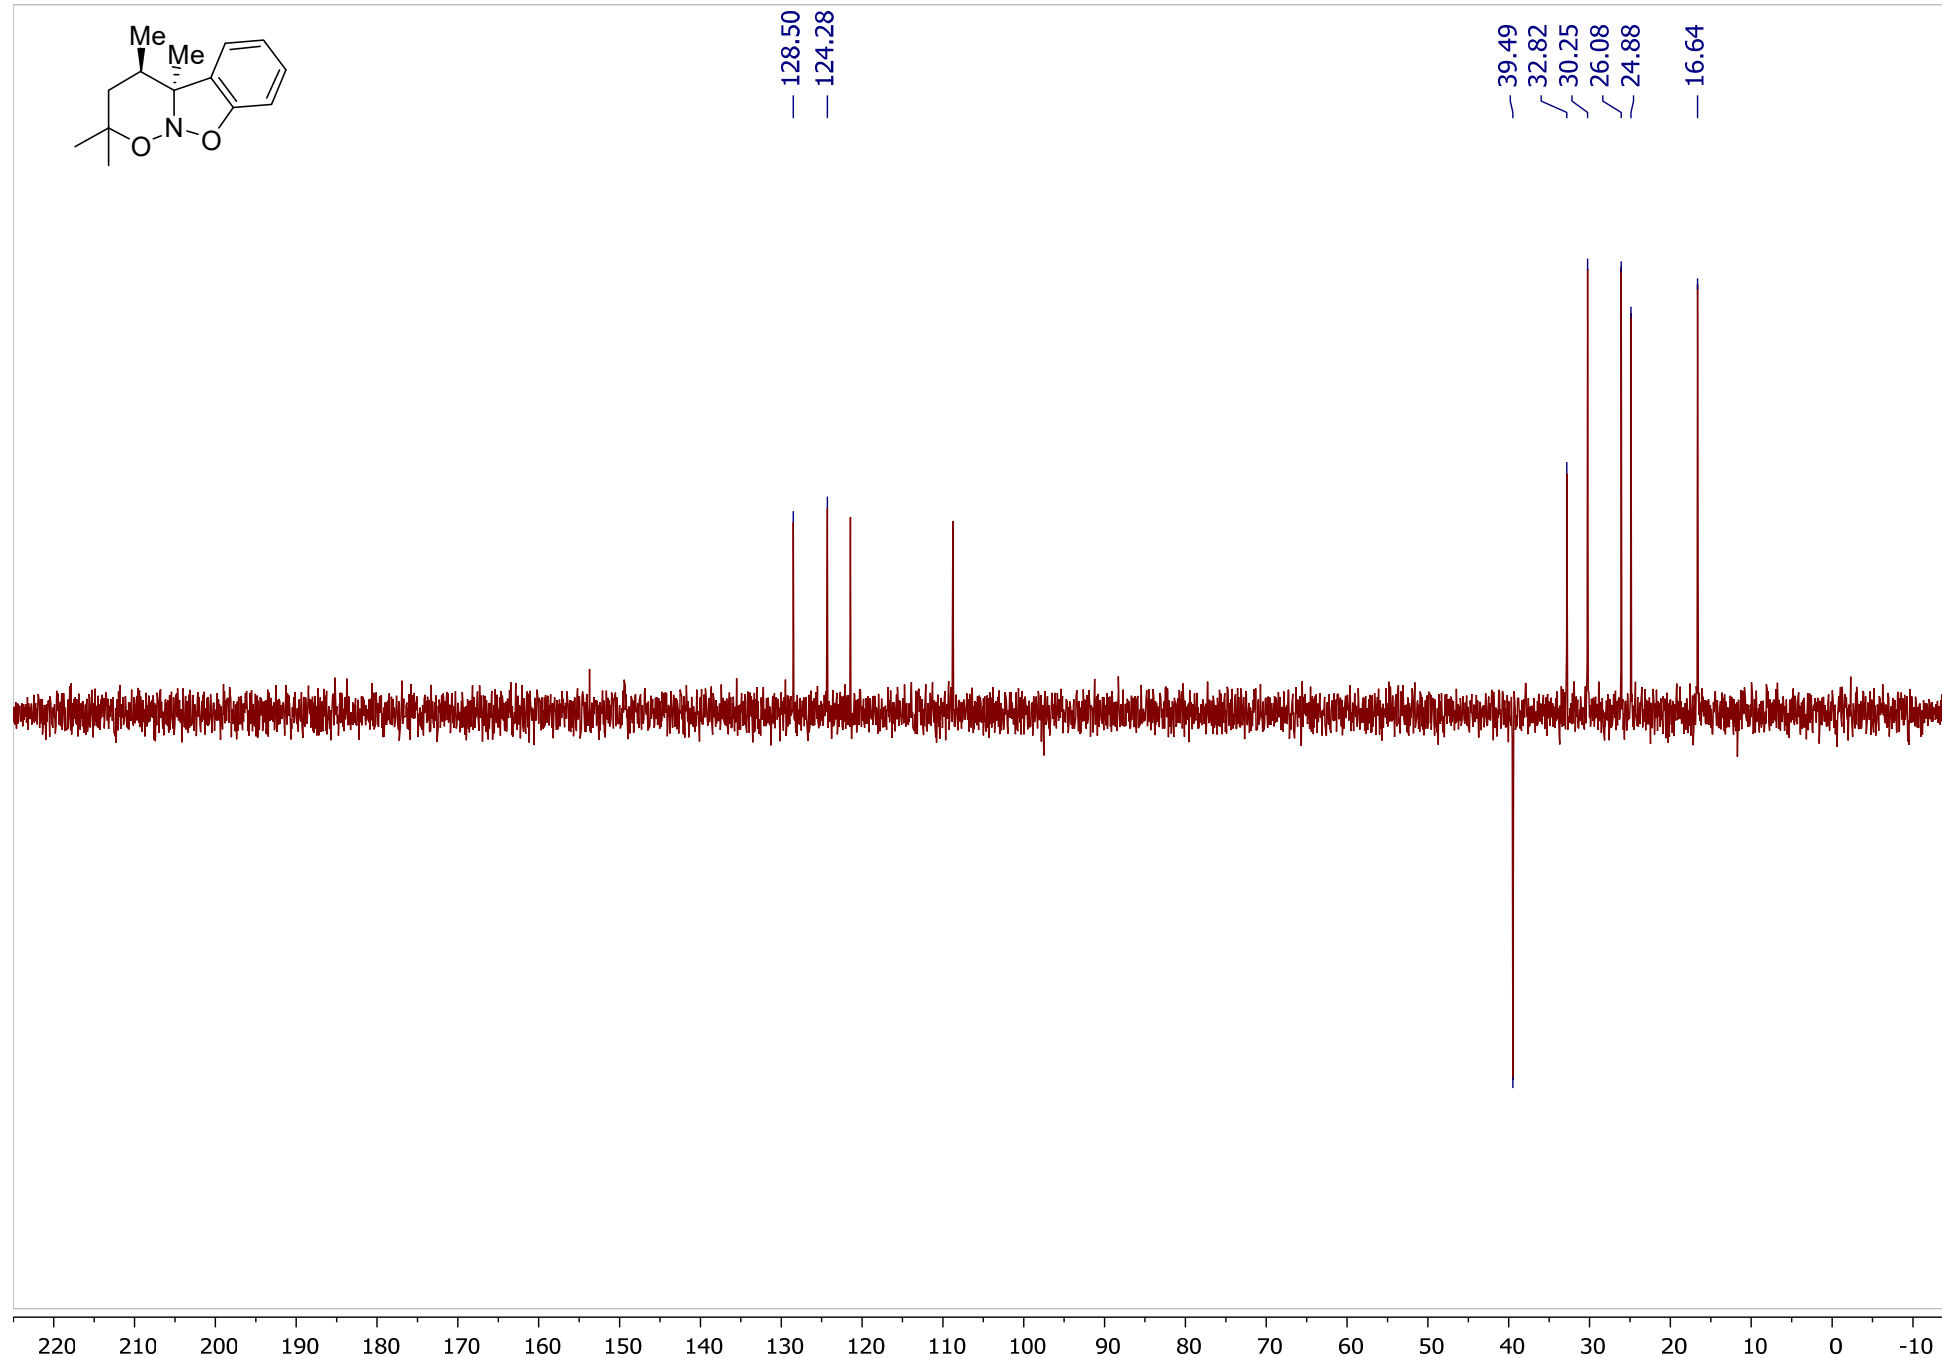

S140

$^1\text{H}$ - $^1\text{H}$  COSY

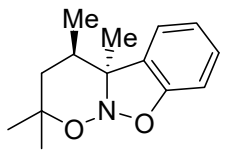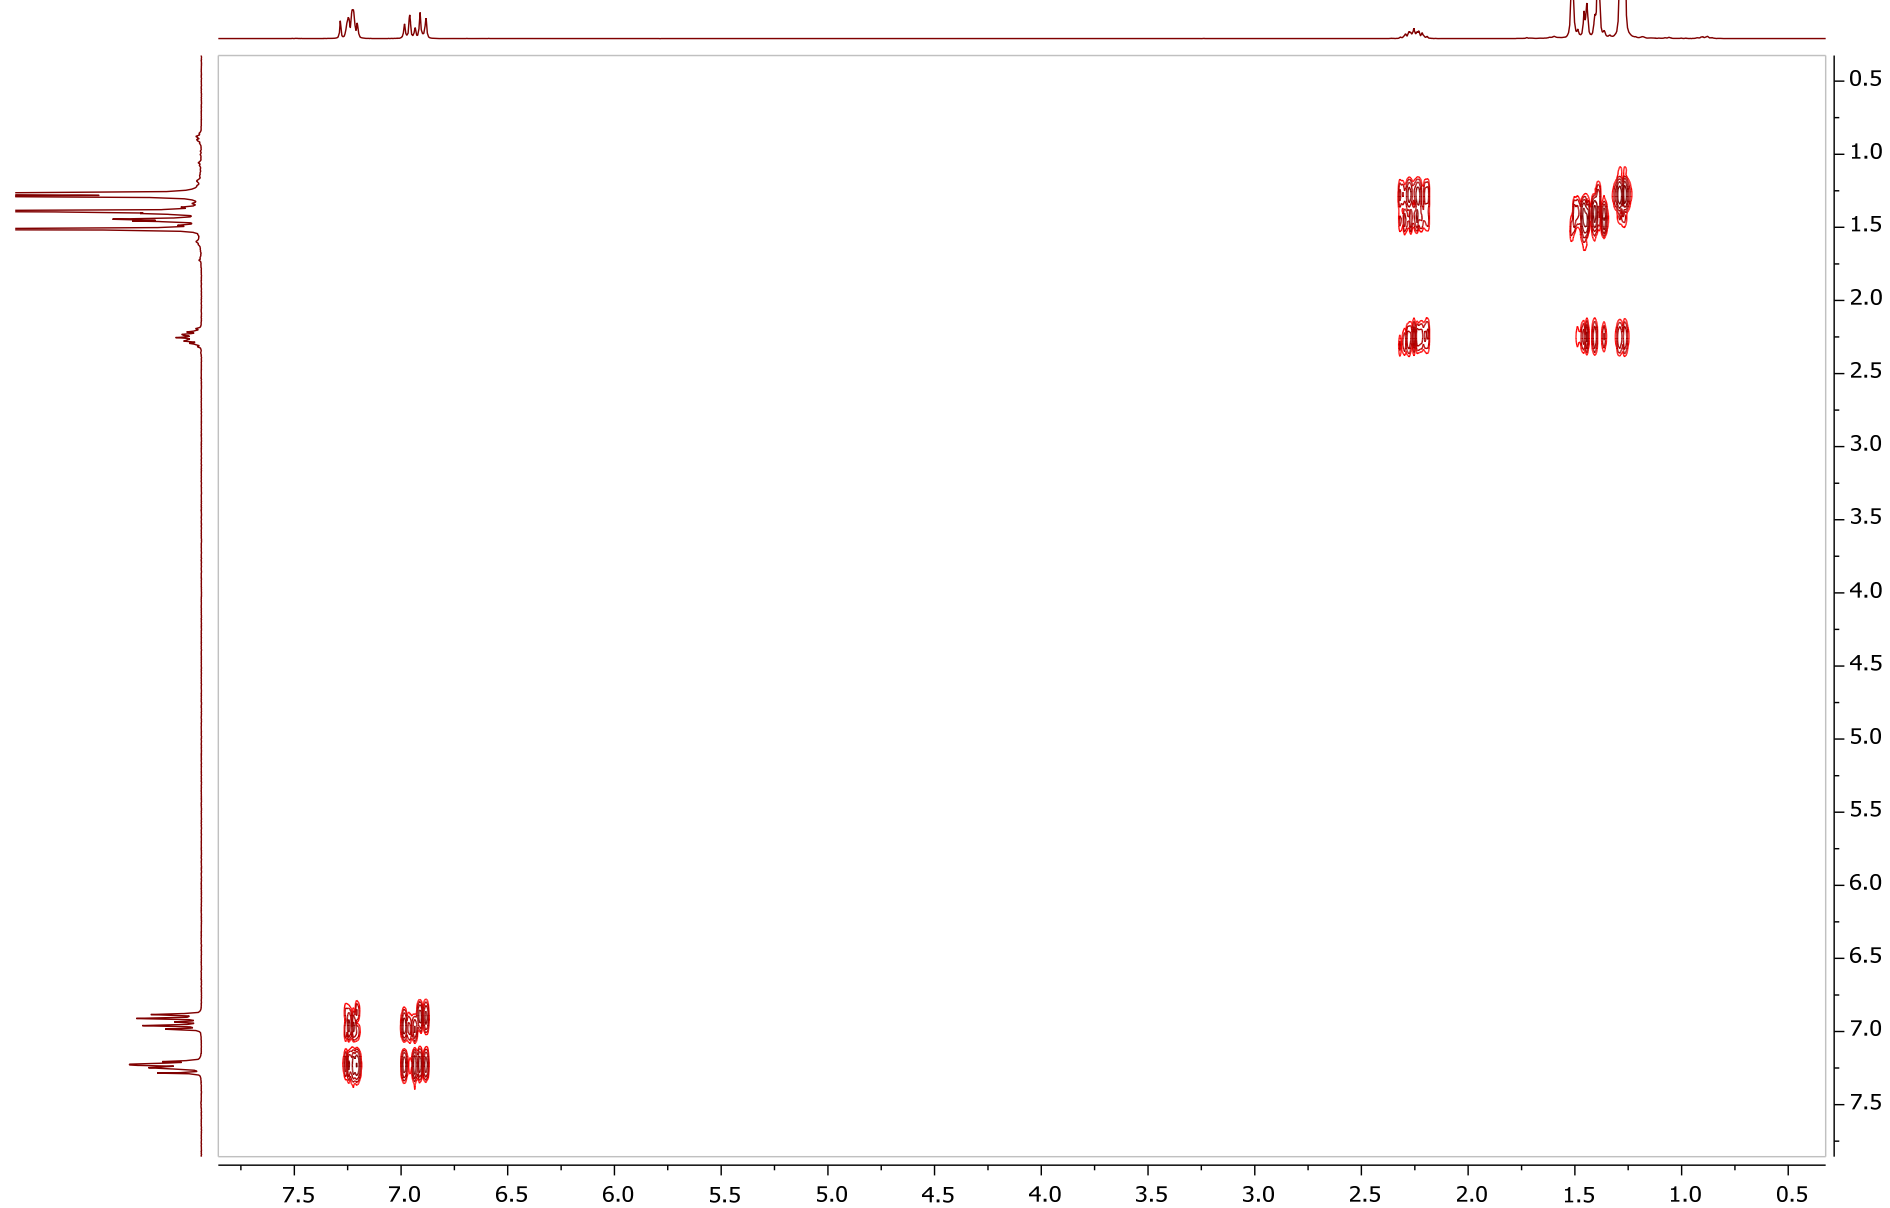

S141

$^1\text{H}$ - $^{13}\text{C}$  HSQC

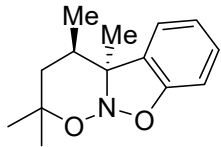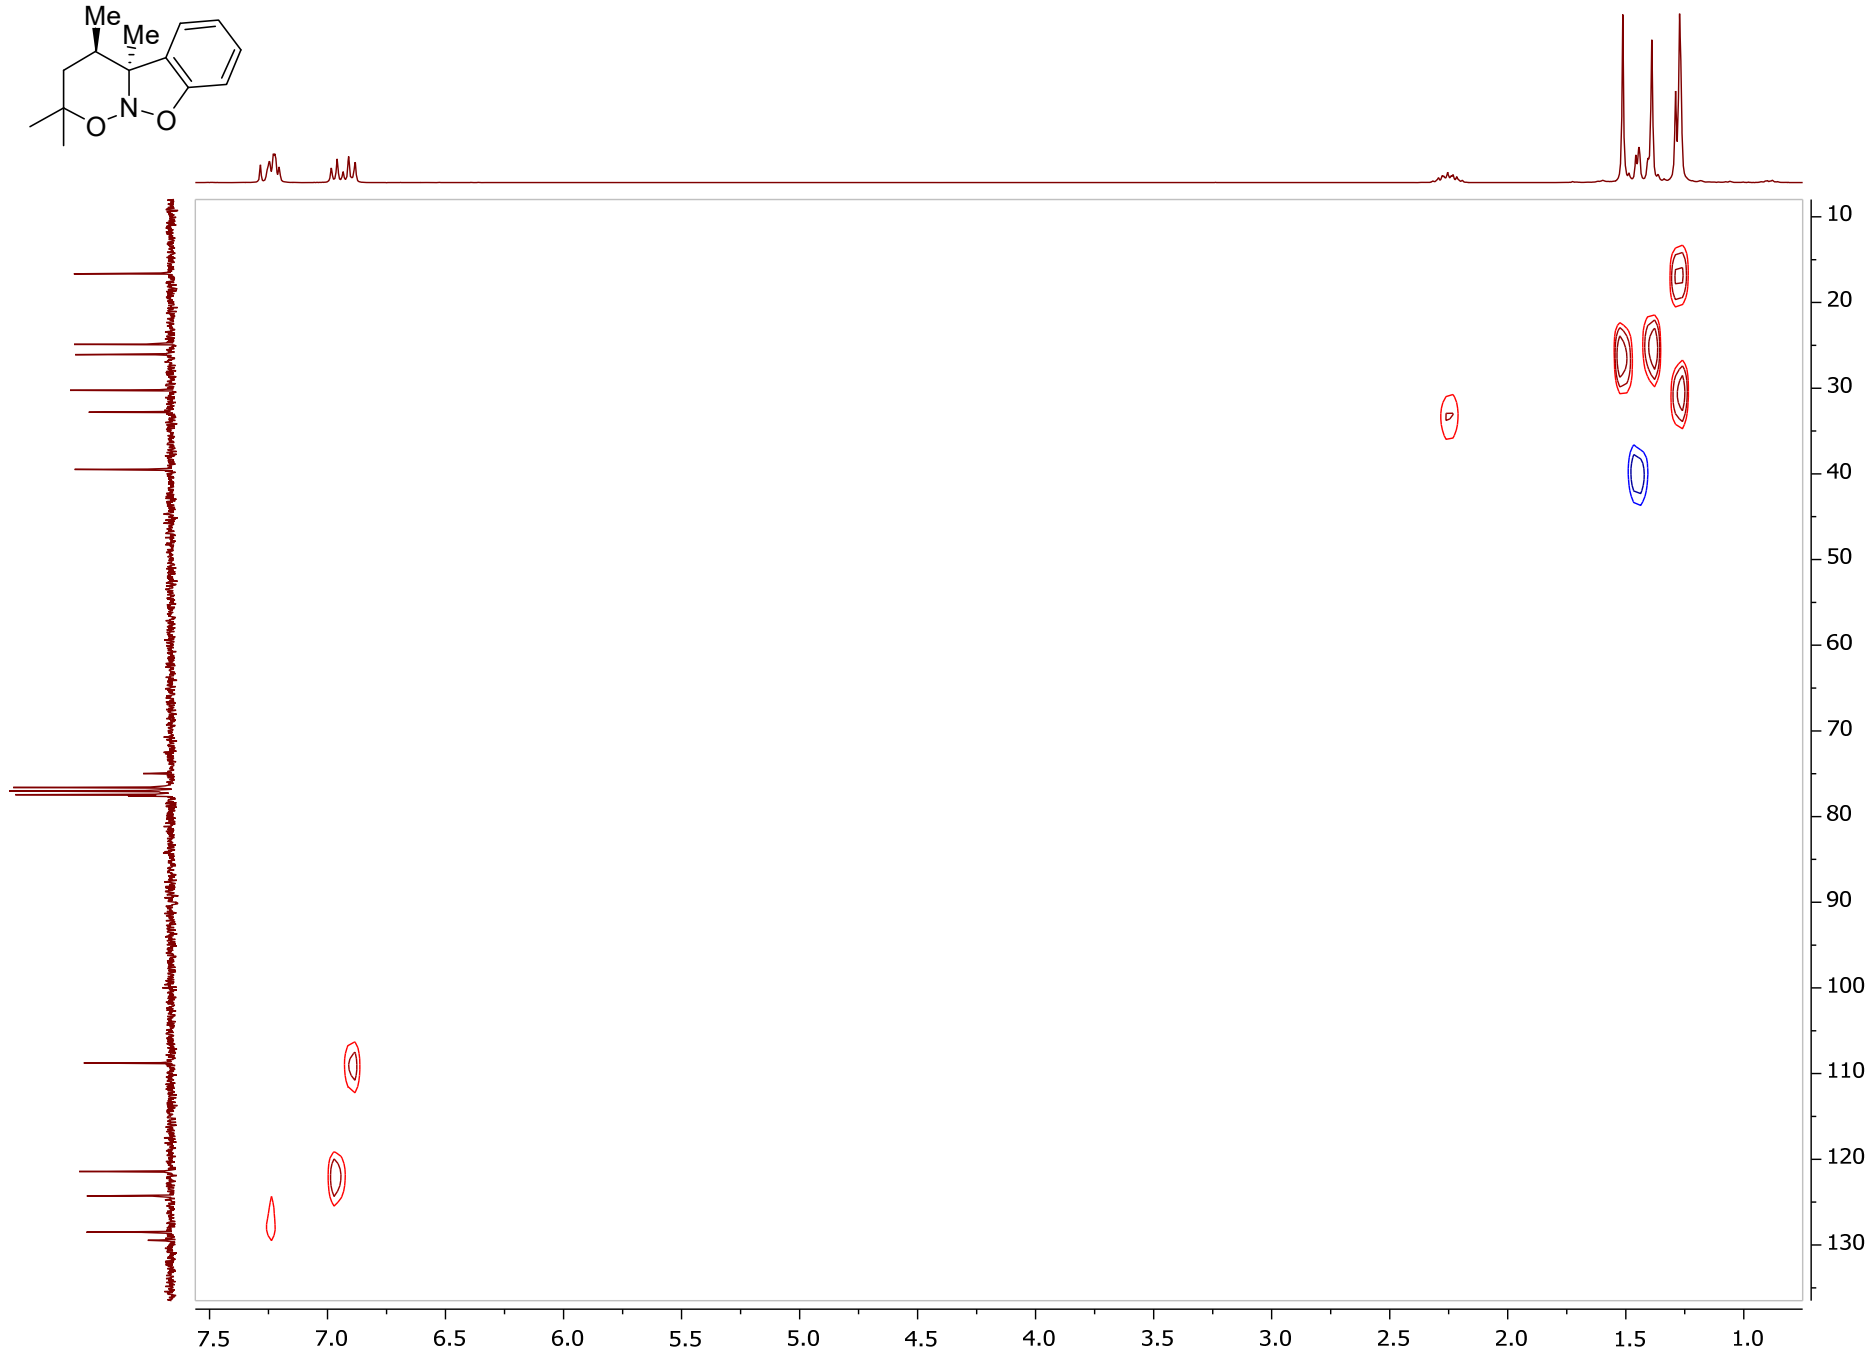

S142

$^1\text{H}$ - $^{13}\text{C}$  HMBC

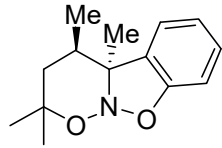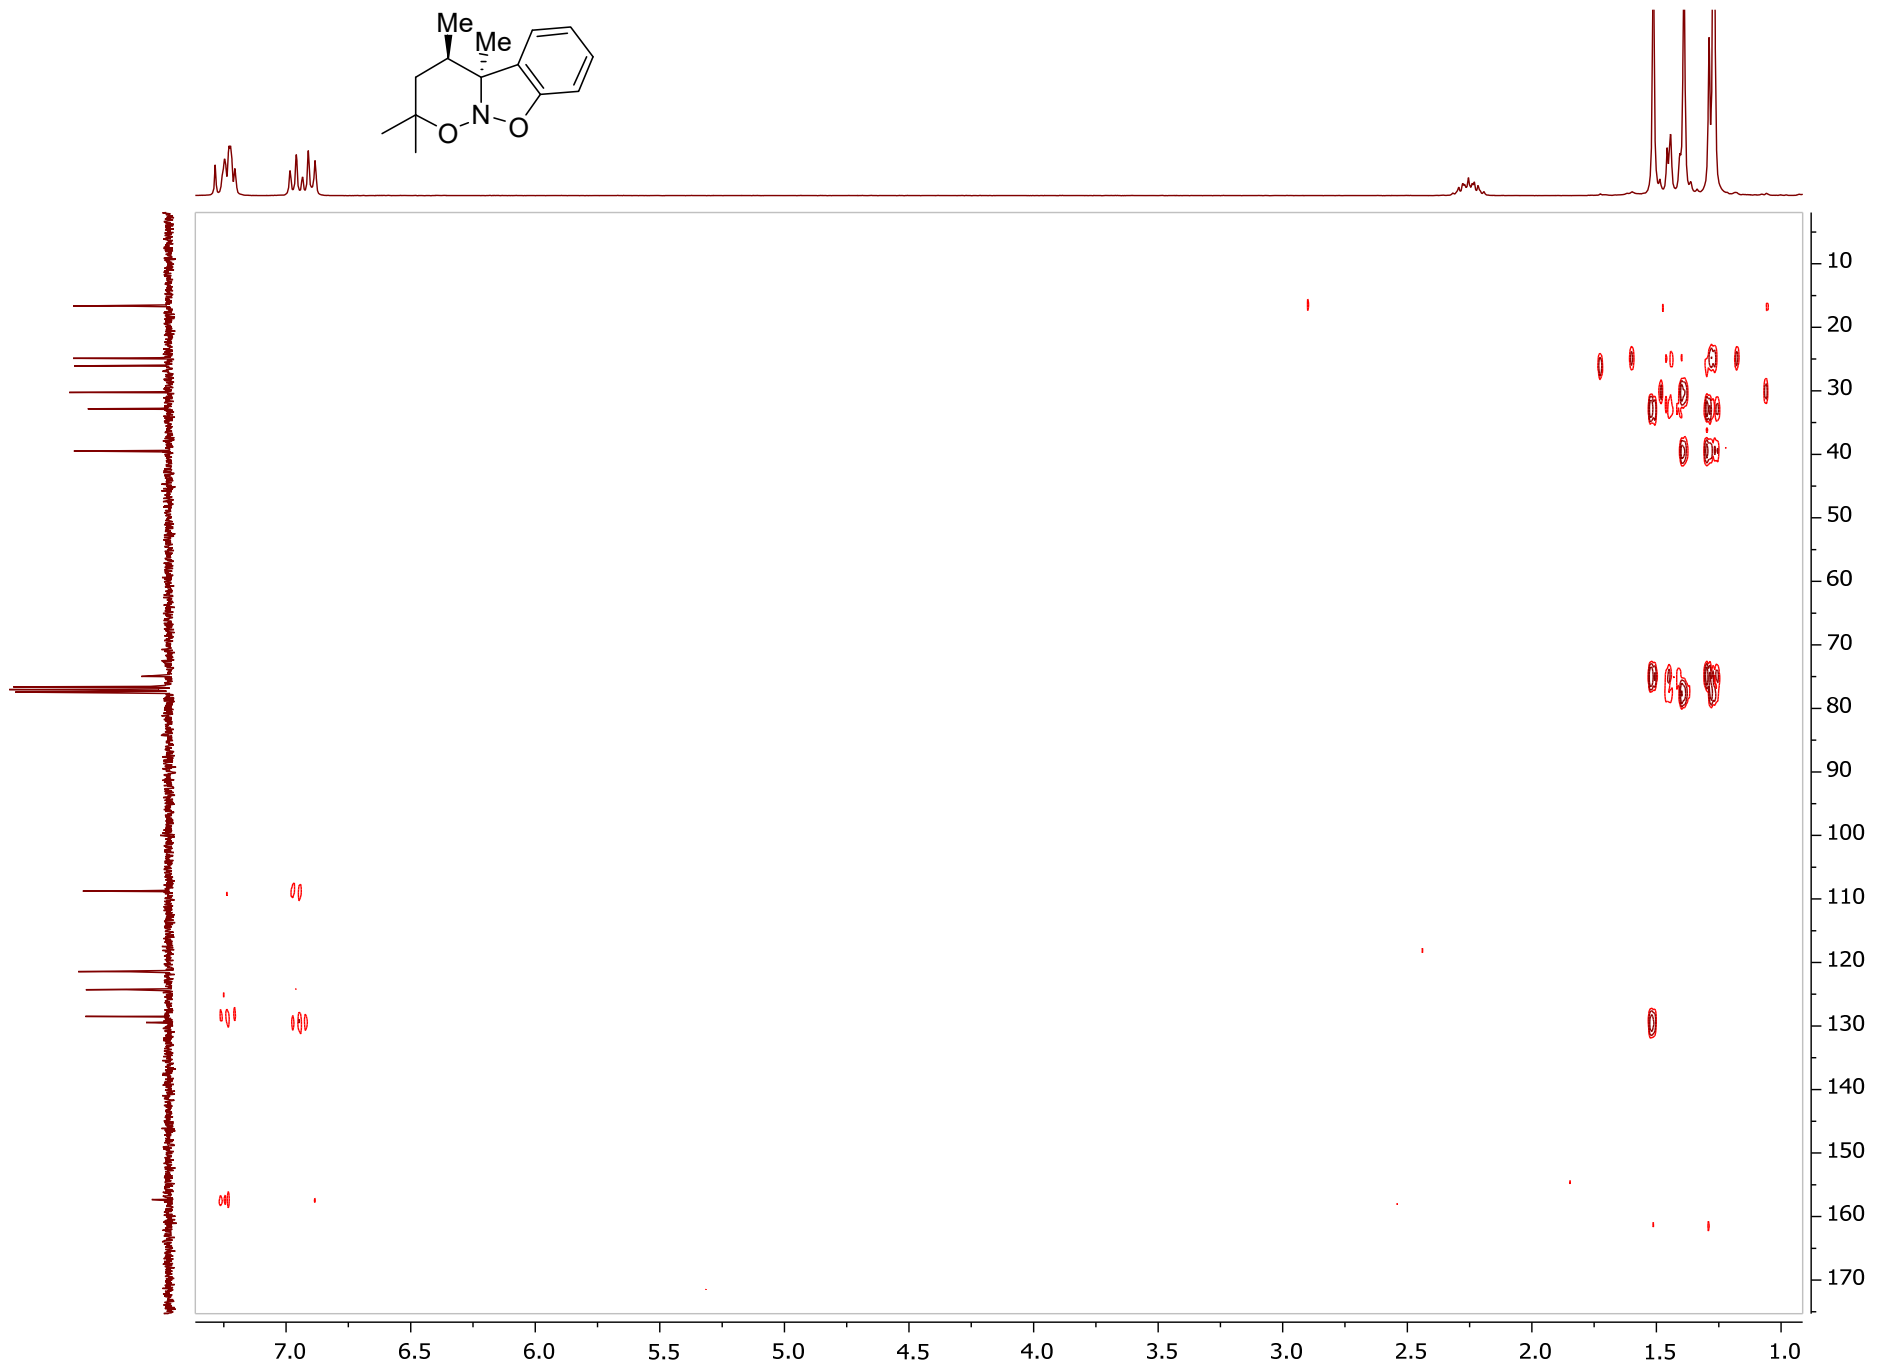

S143

$^1\text{H}$ - $^1\text{H}$  NOESY

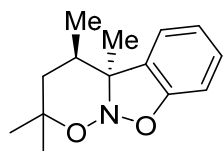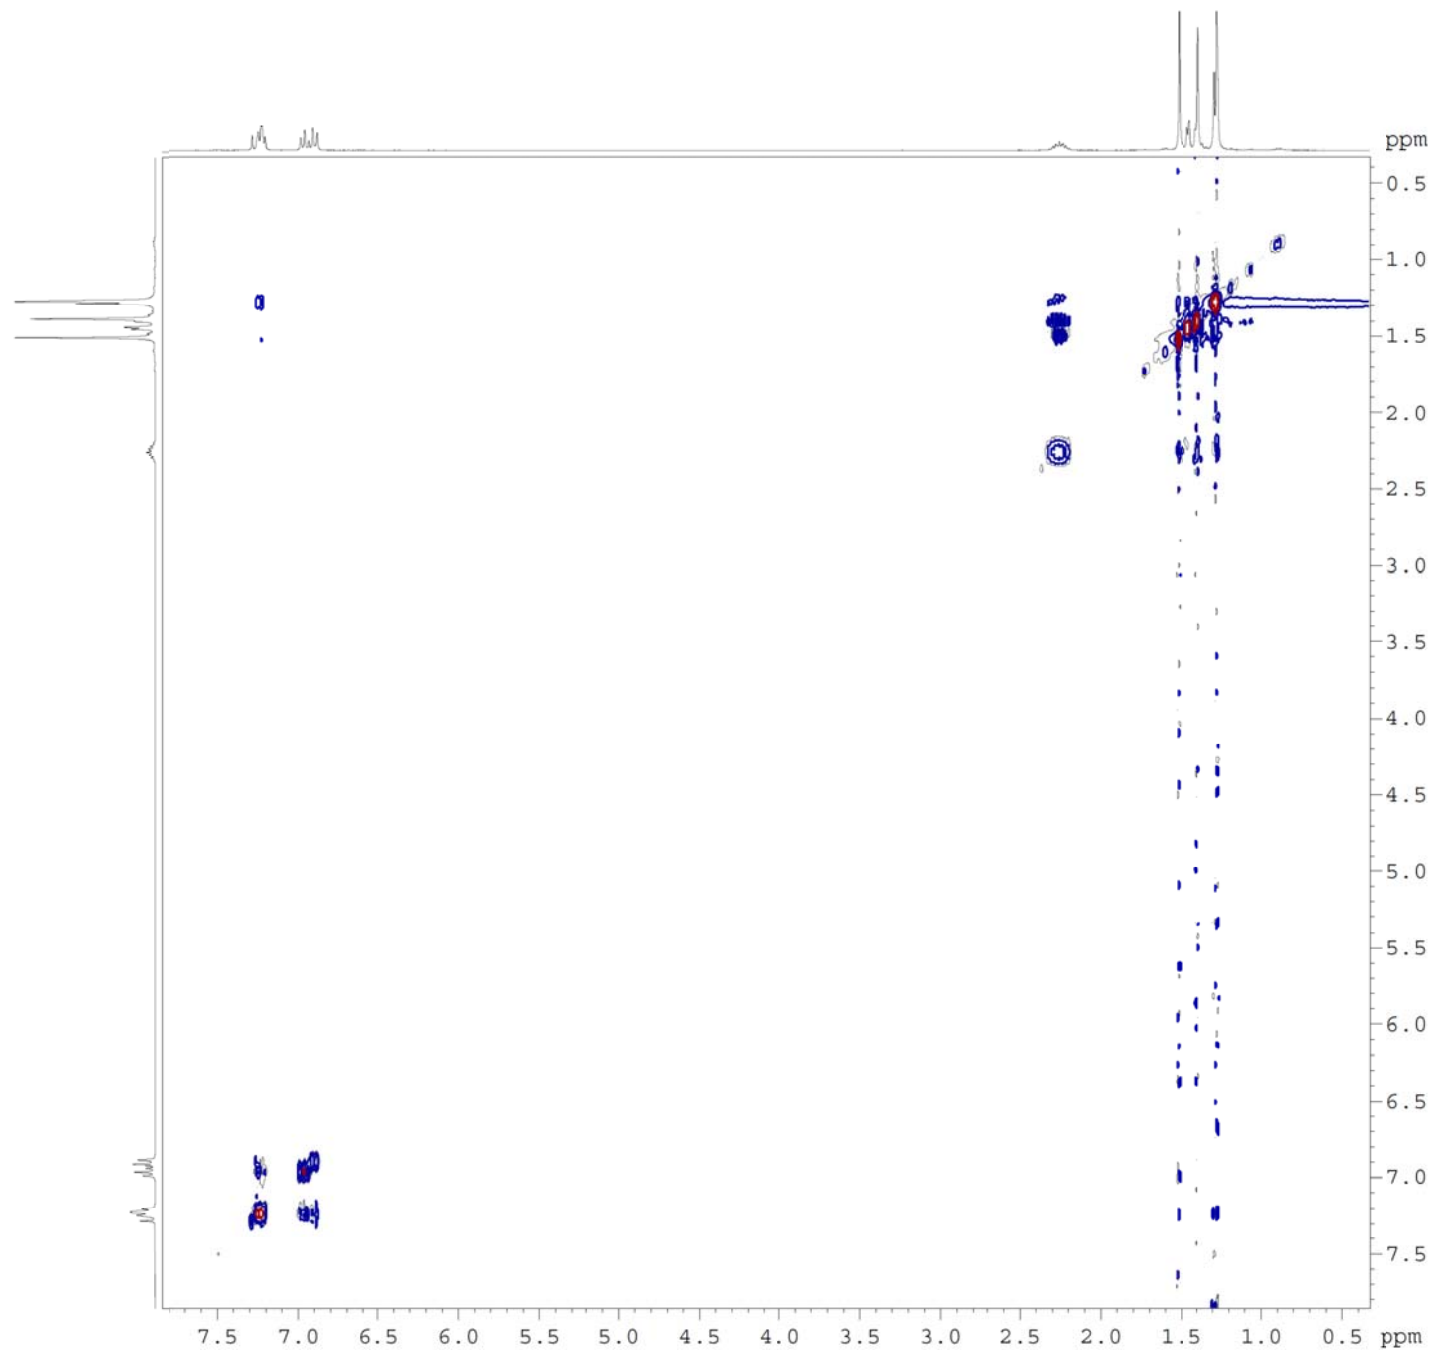



(4S\*,4aS\*)-4a-Ethyl-4-(4-methoxyphenyl)-2,2-dimethyl-2,3,4,4a-tetrahydrobenzo[4,5]isoxazolo[2,3-b][1,2]oxazine 5ea

<sup>1</sup>H NMR (300 MHz, CDCl<sub>3</sub>)

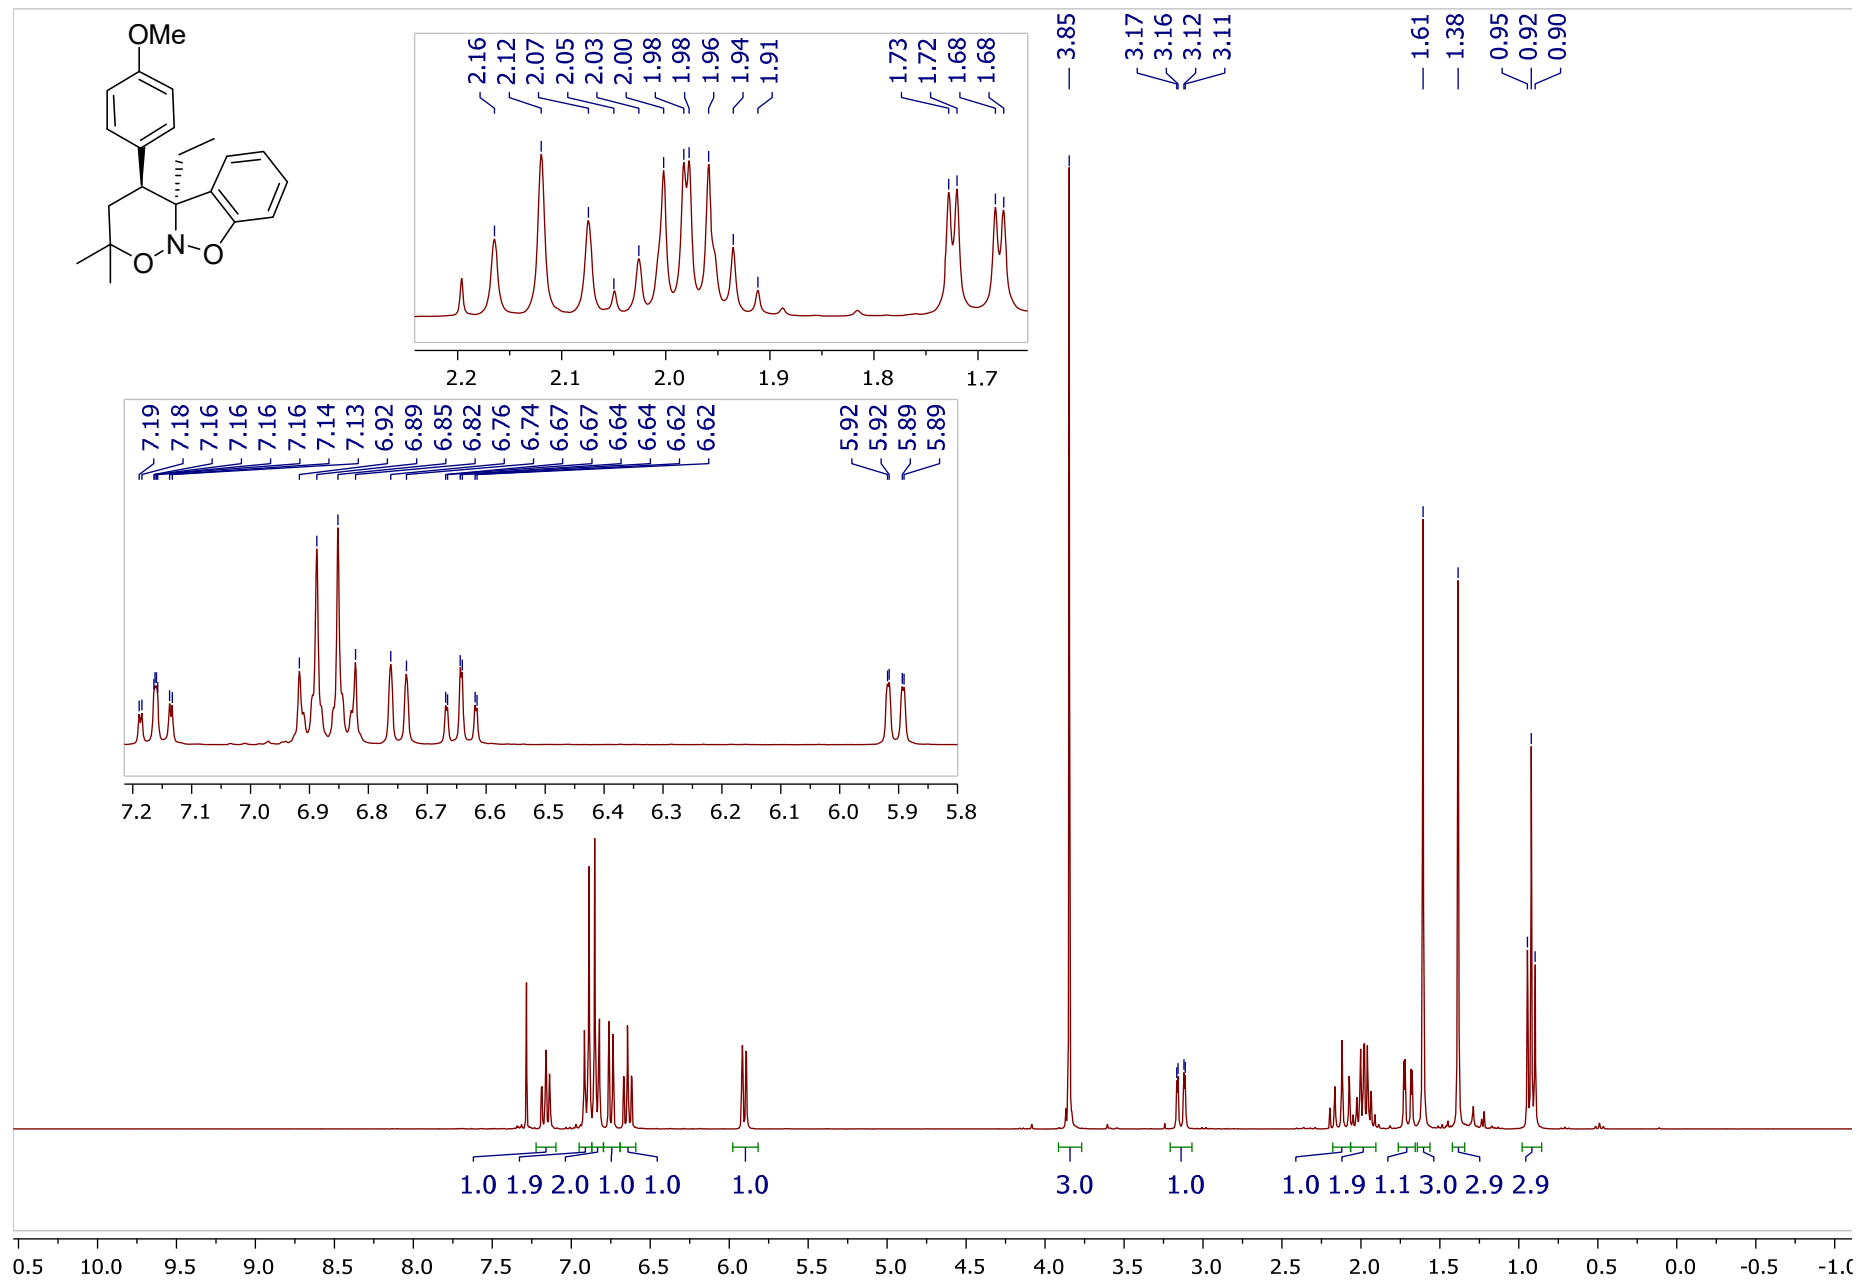

<sup>13</sup>C NMR (75 MHz, CDCl<sub>3</sub>)

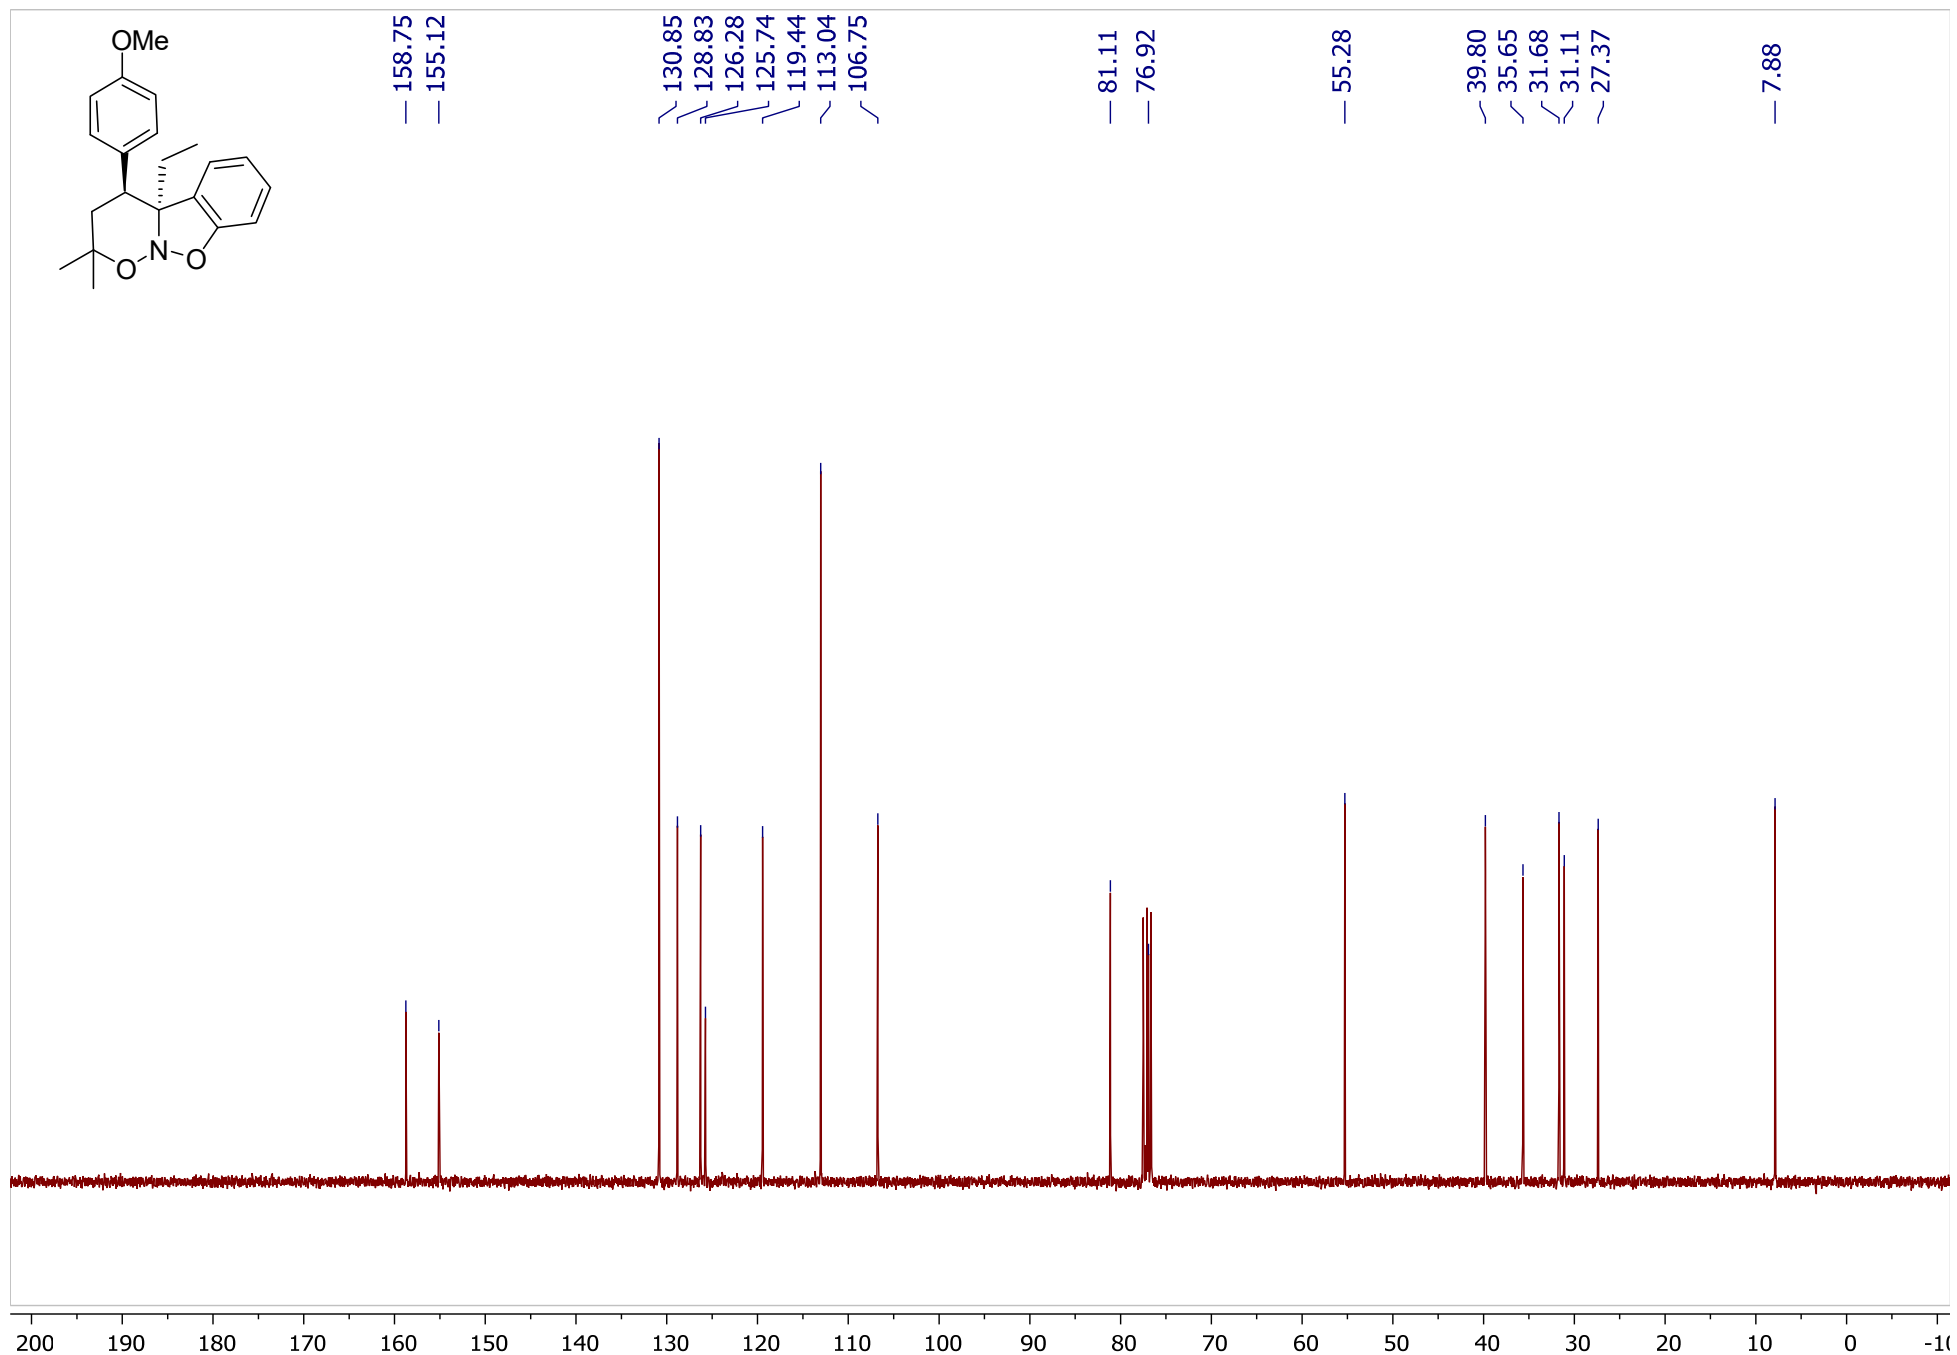

$^{13}\text{C}$  DEPT 135 (75 MHz,  $\text{CDCl}_3$ )

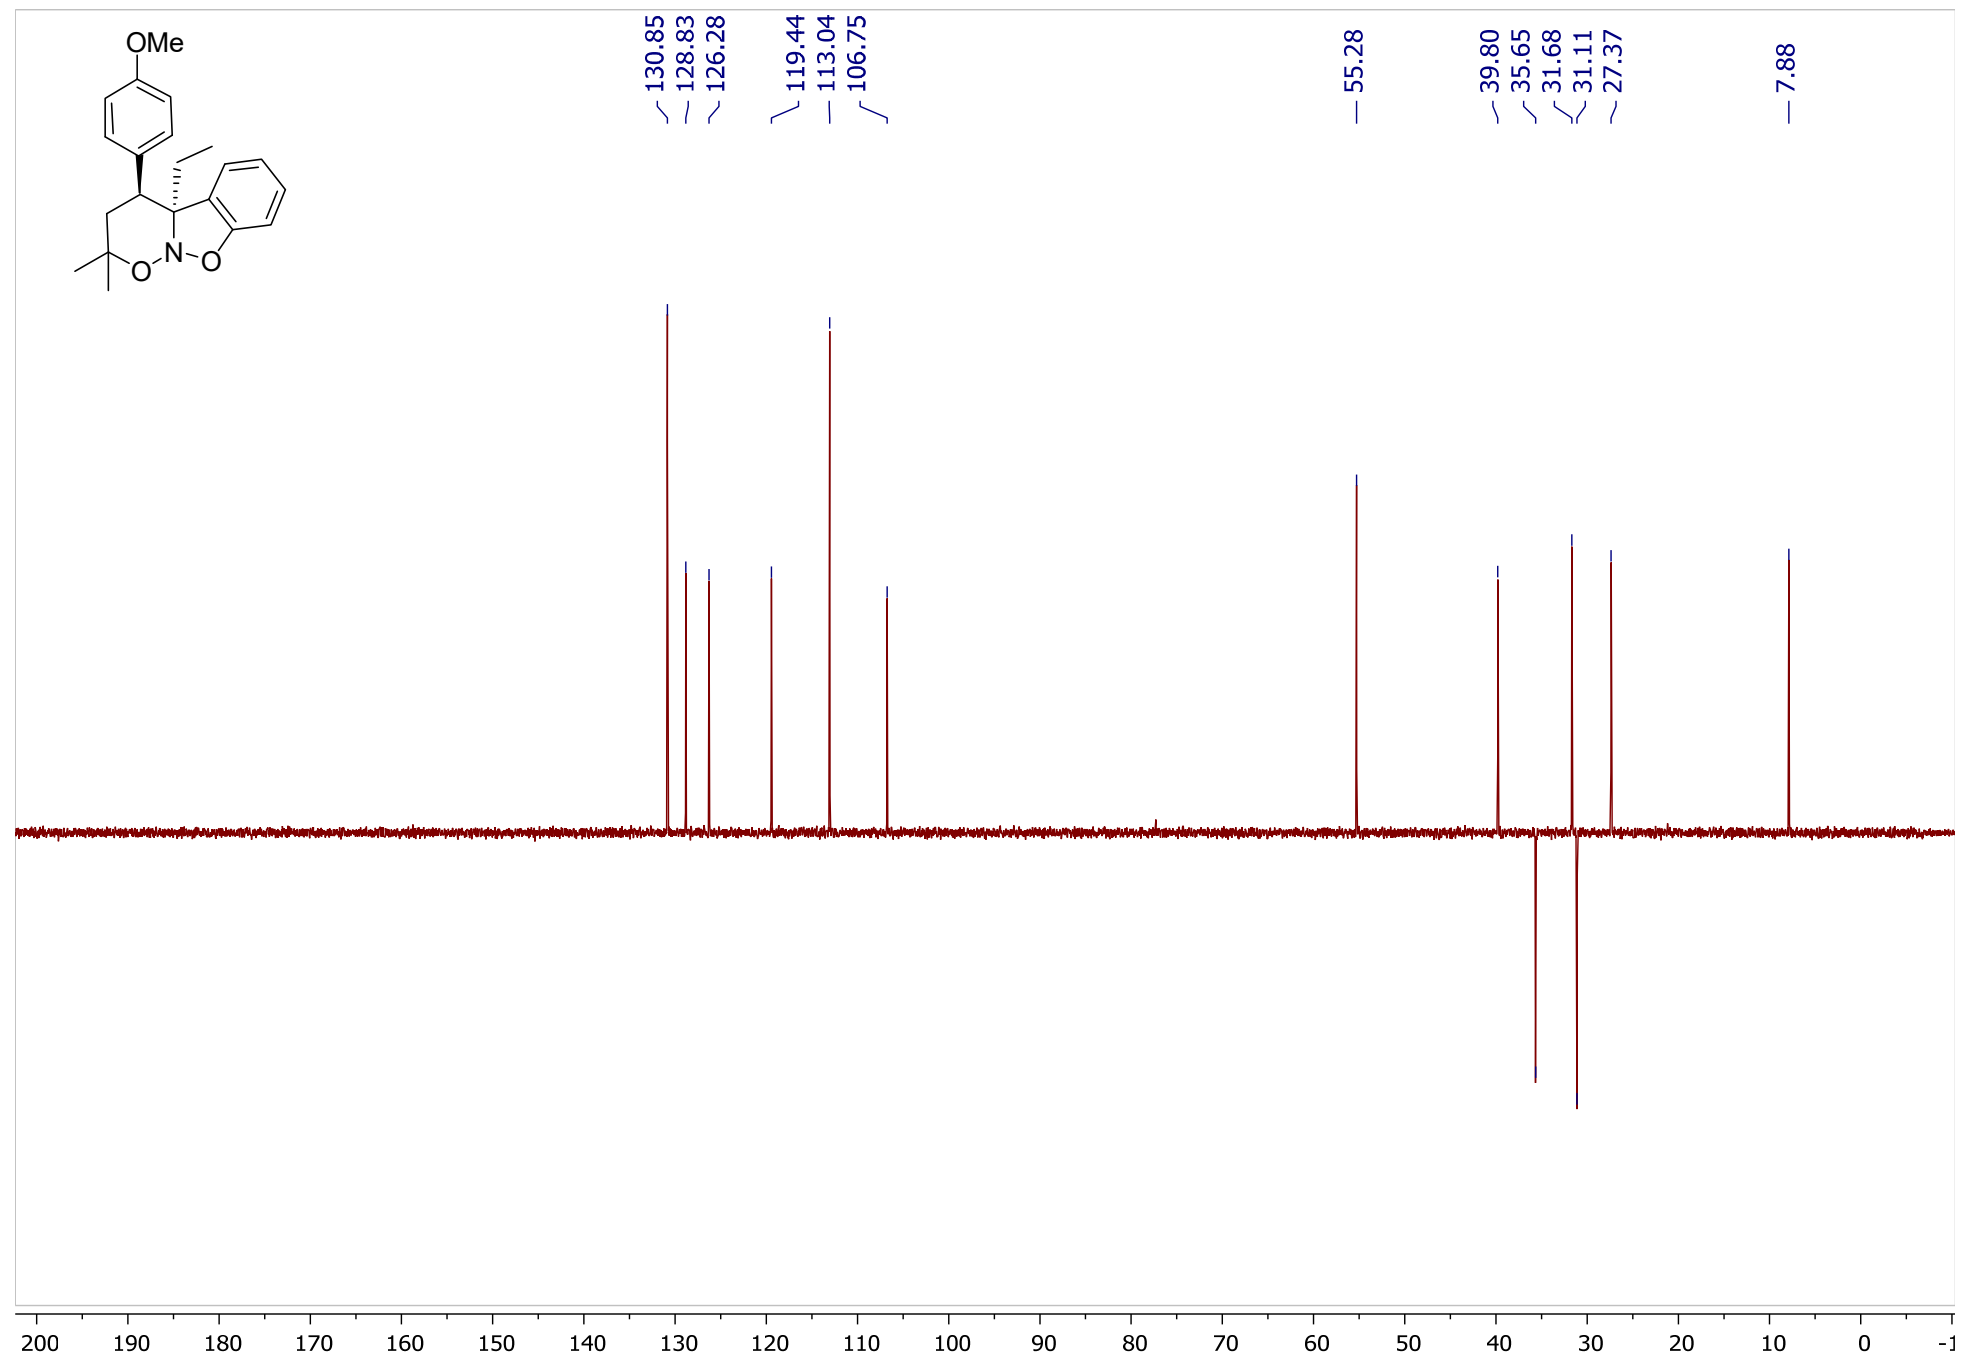

$^1\text{H}$ - $^1\text{H}$  COSY

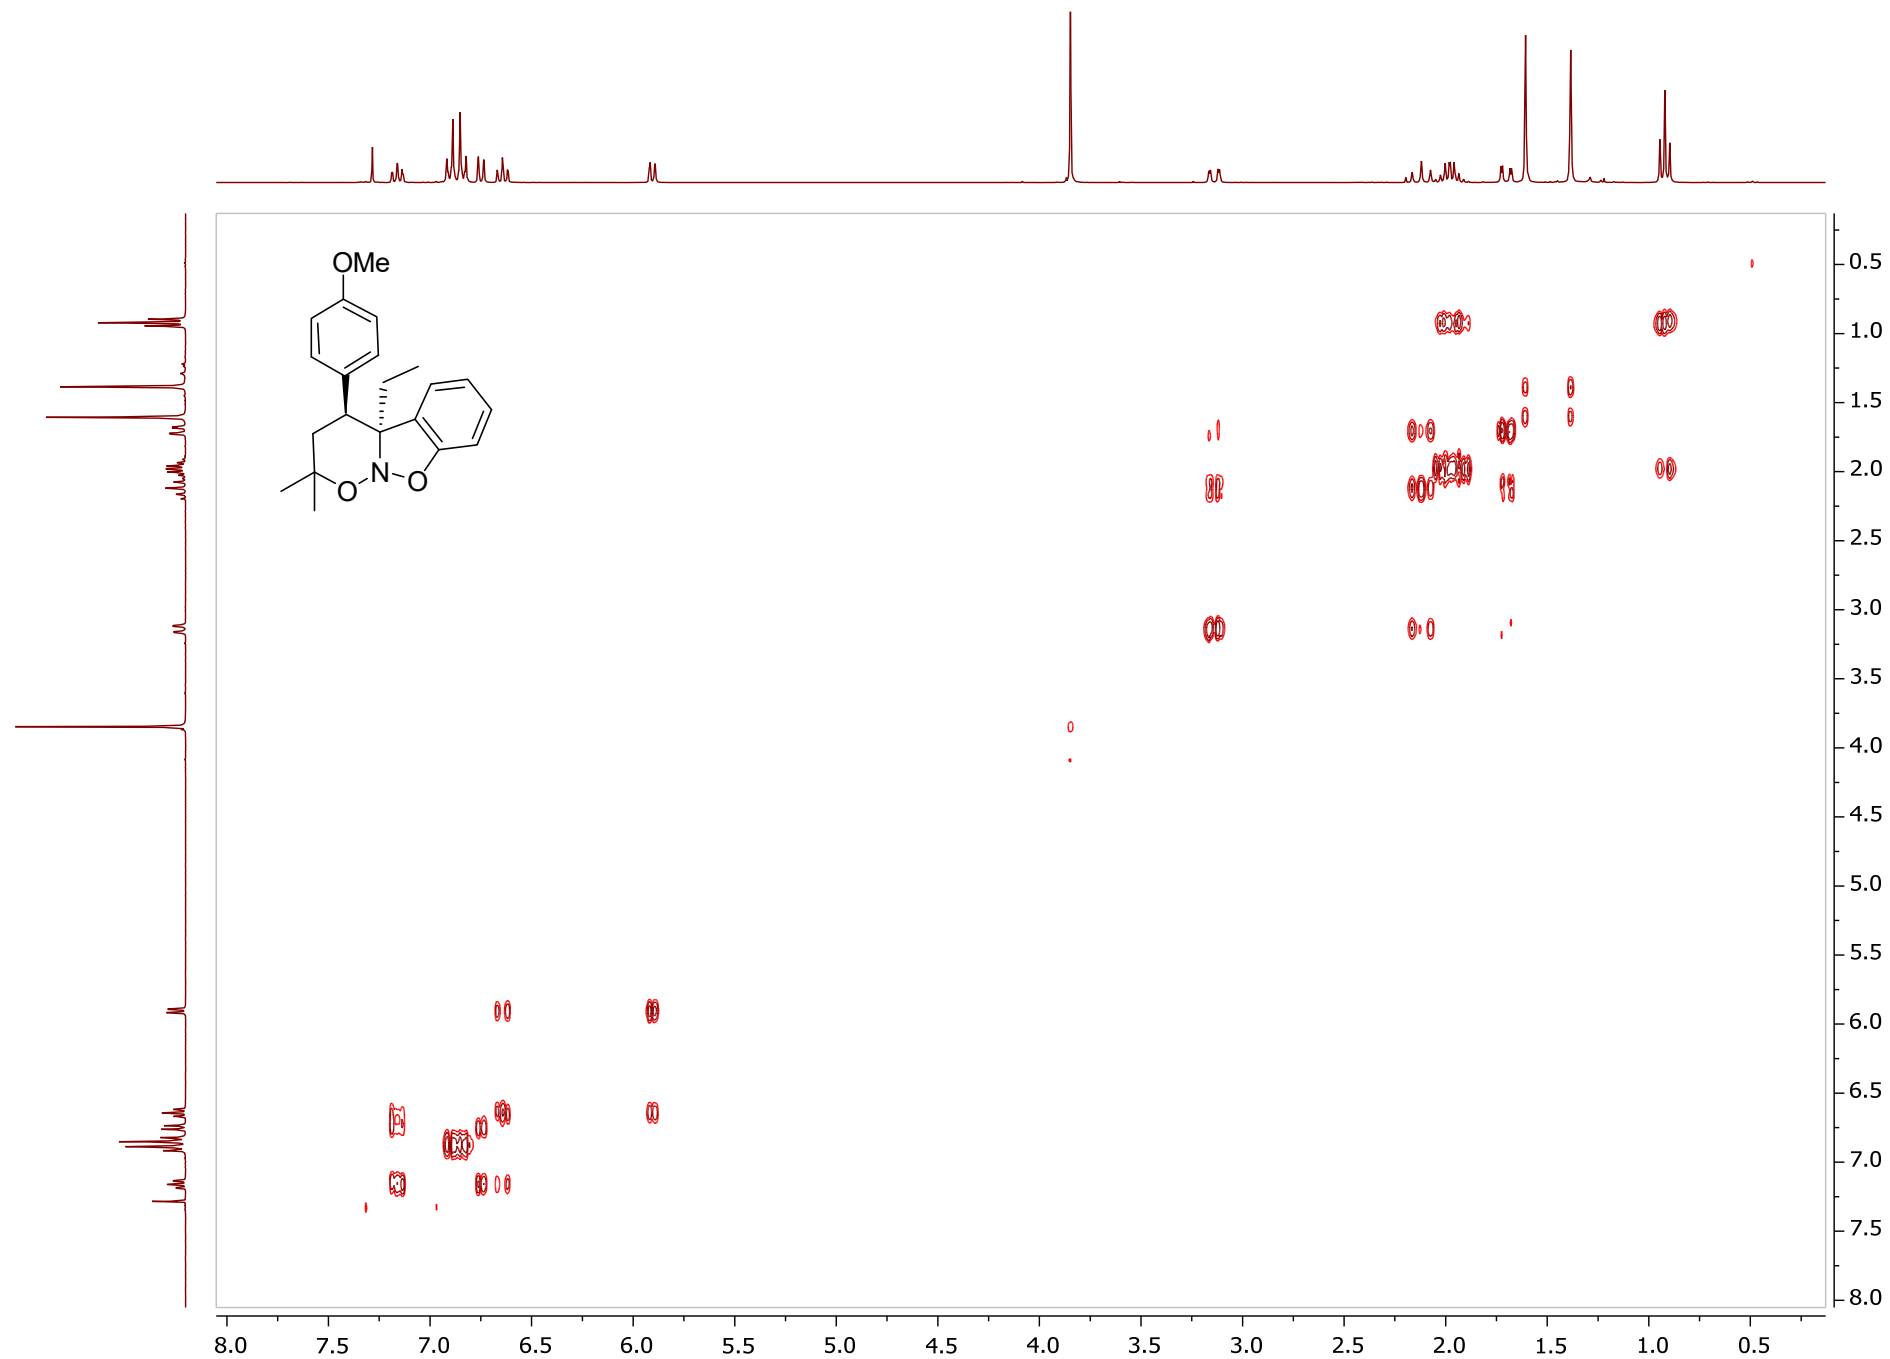

$^1\text{H}$ - $^{13}\text{C}$  HSQC

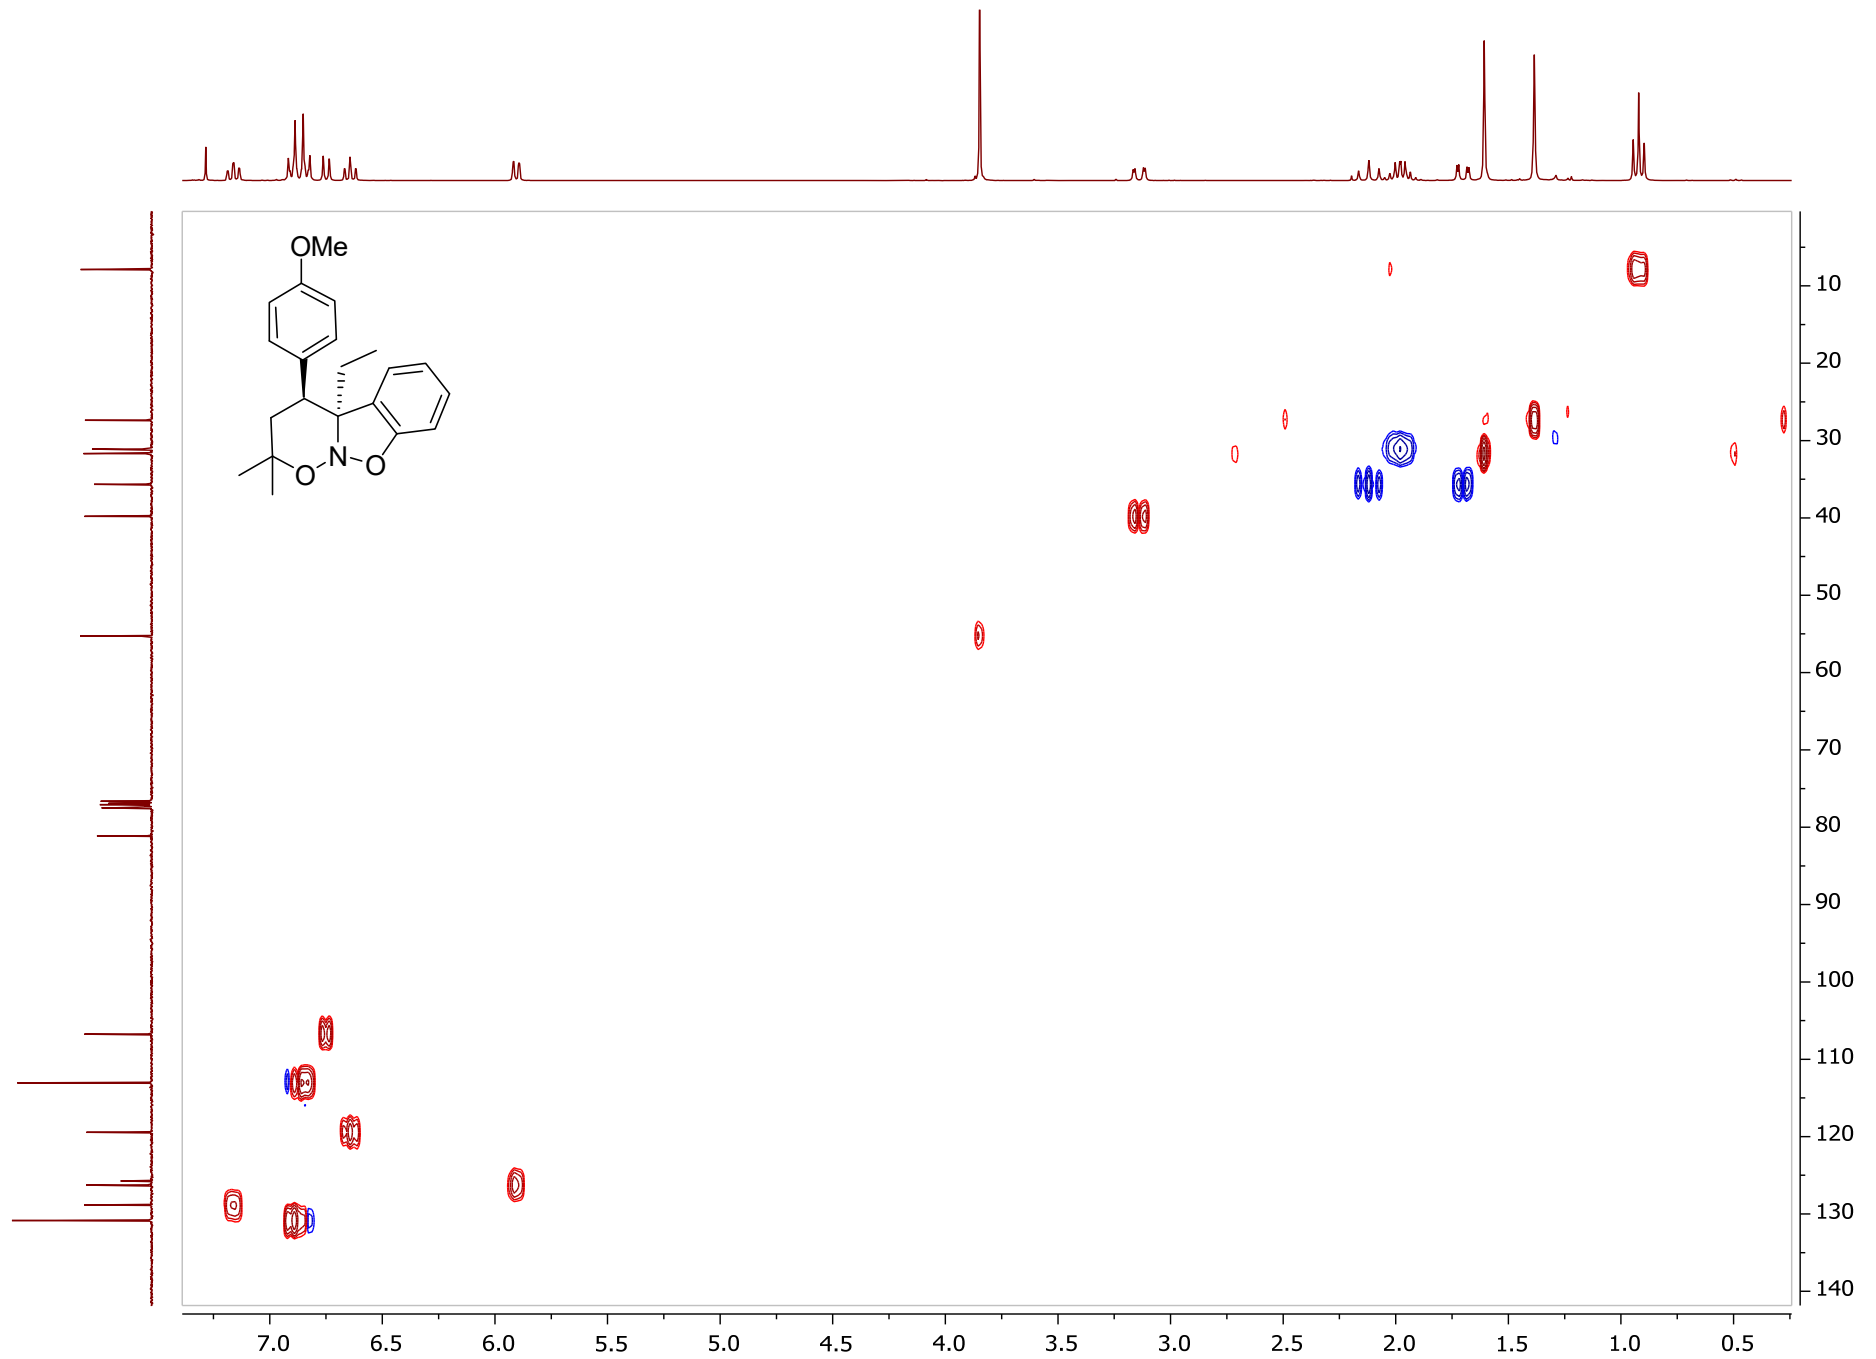

S149

$^1\text{H}$ - $^{13}\text{C}$  HMBC

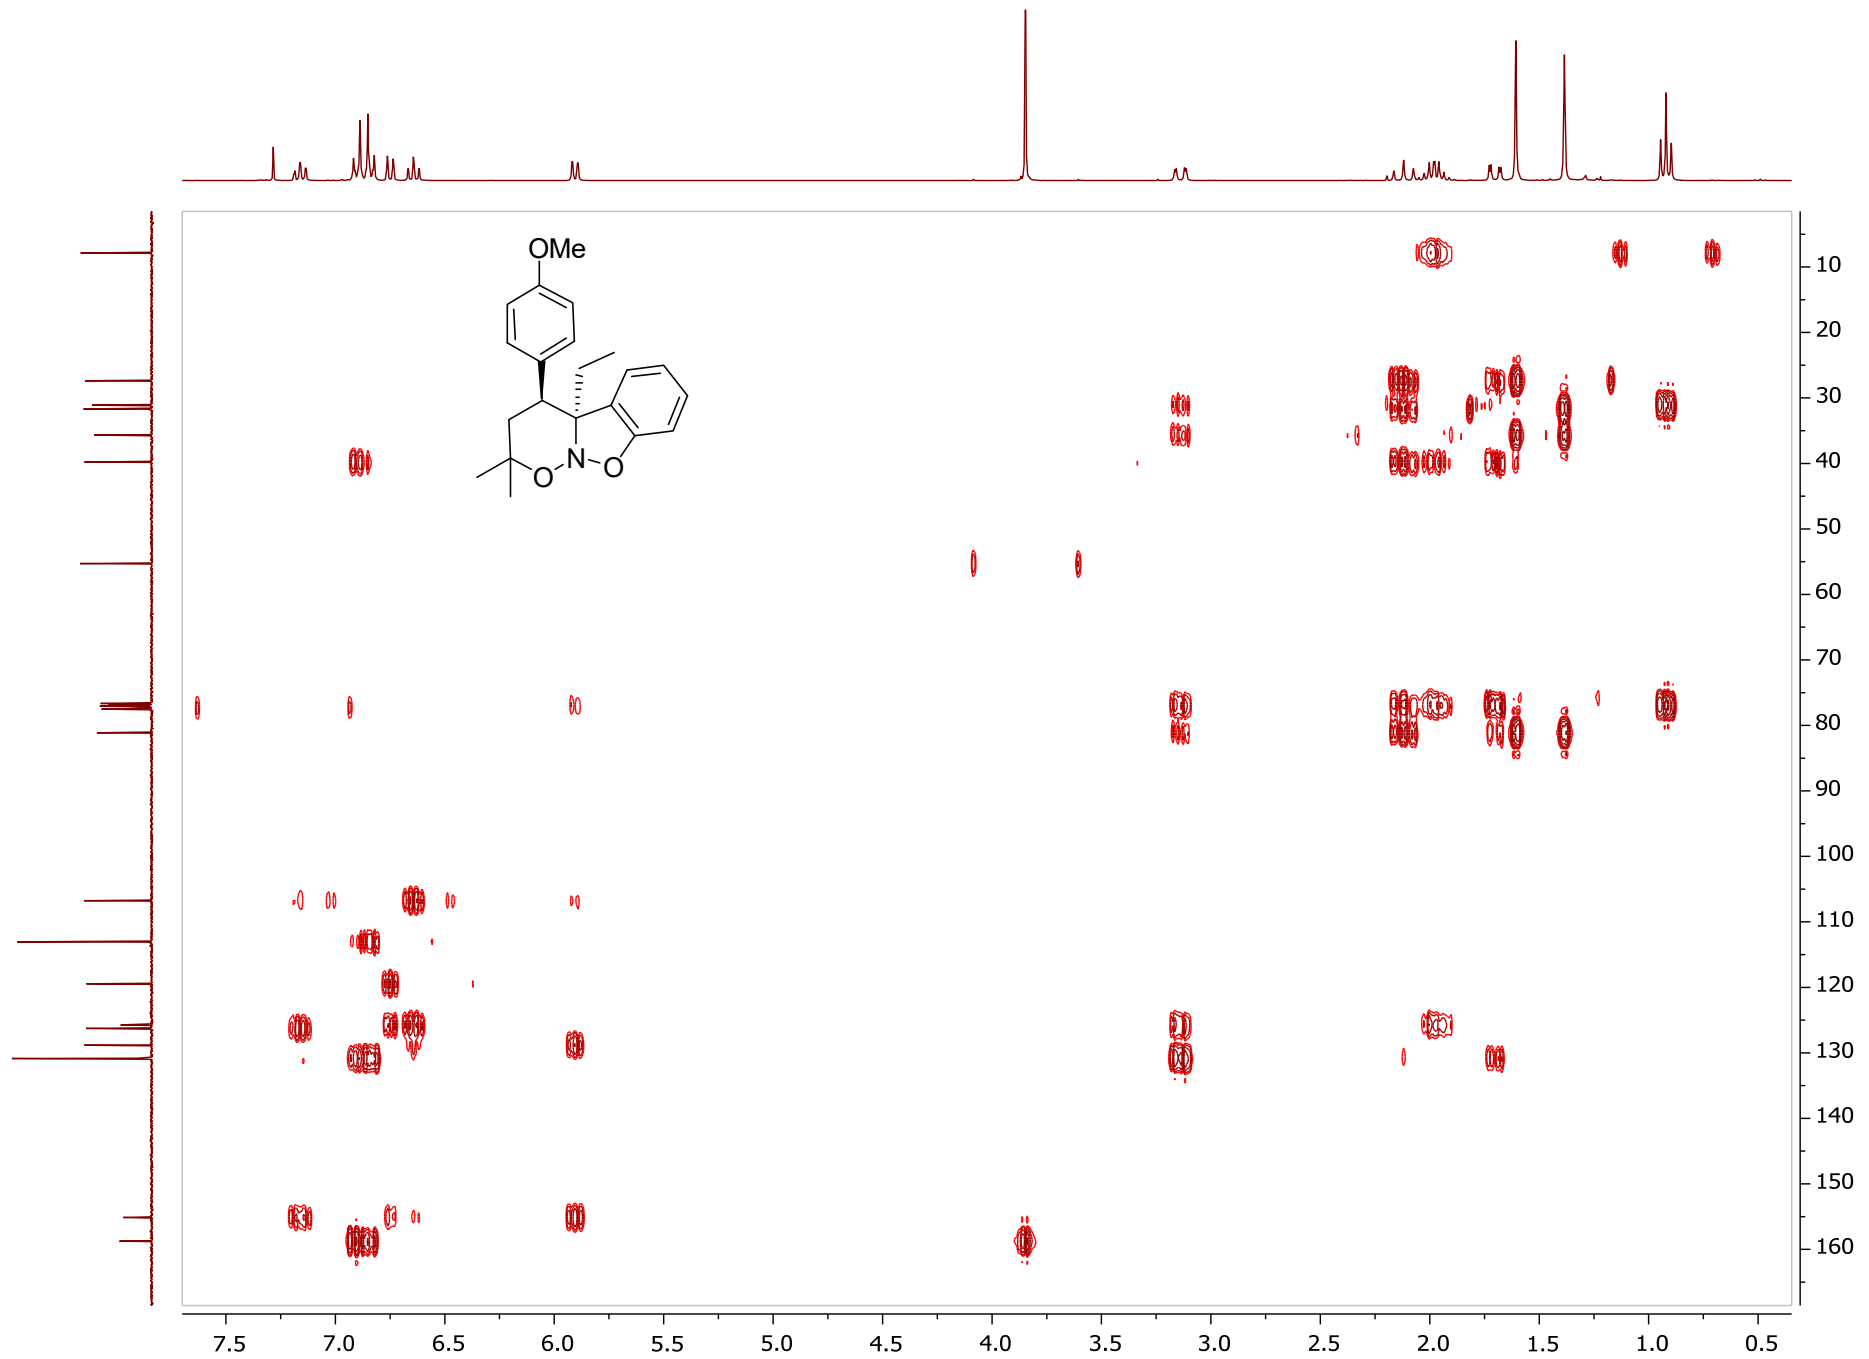

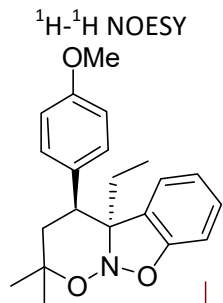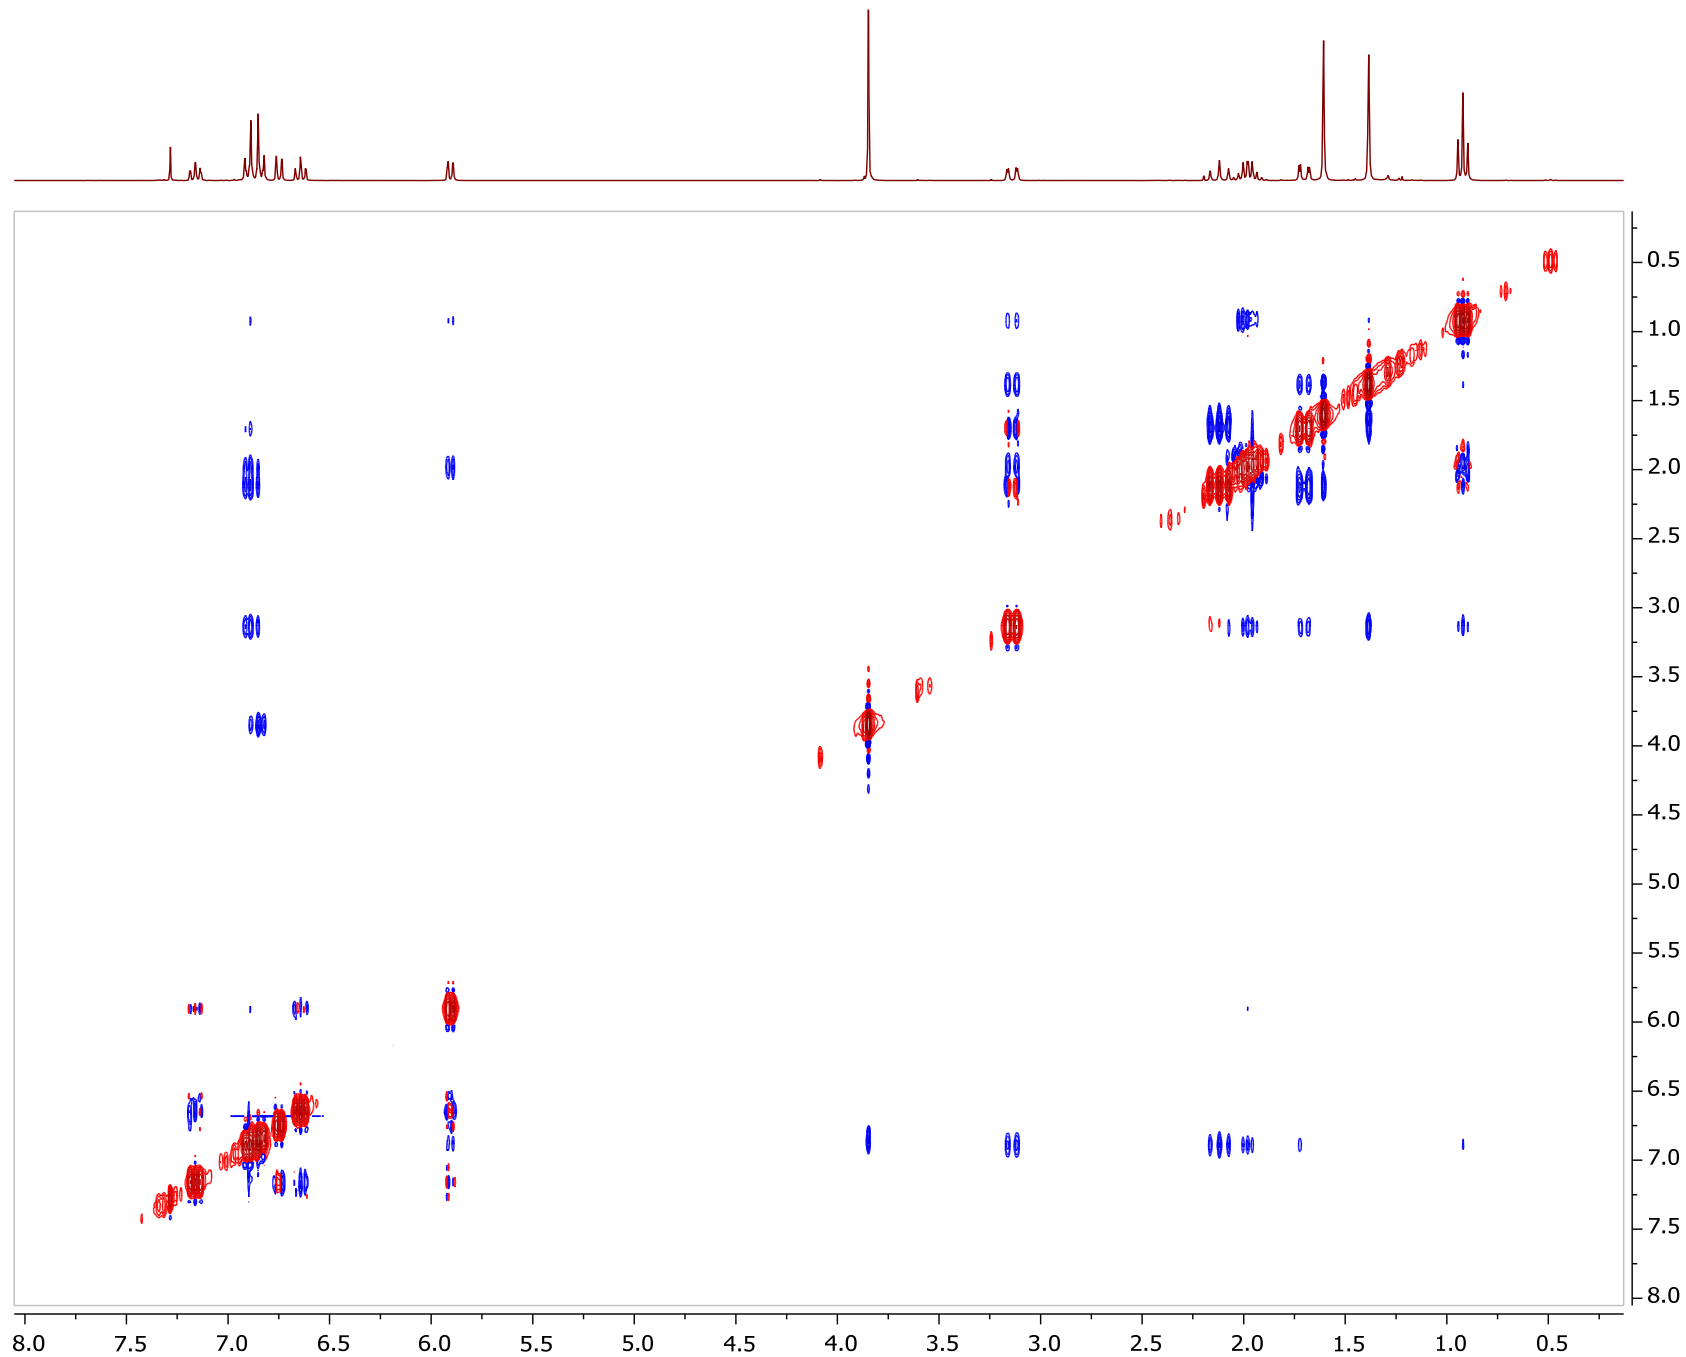

**(4*S*\*,4*aS*\*)-4-(2-Chlorophenyl)-4*a*-ethyl-2,2-dimethyl-2,3,4,4*a*-tetrahydrobenzo[4,5]isoxazolo[2,3-*b*][1,2]oxazine 5*fa***

<sup>1</sup>H NMR (300 MHz, CDCl<sub>3</sub>)

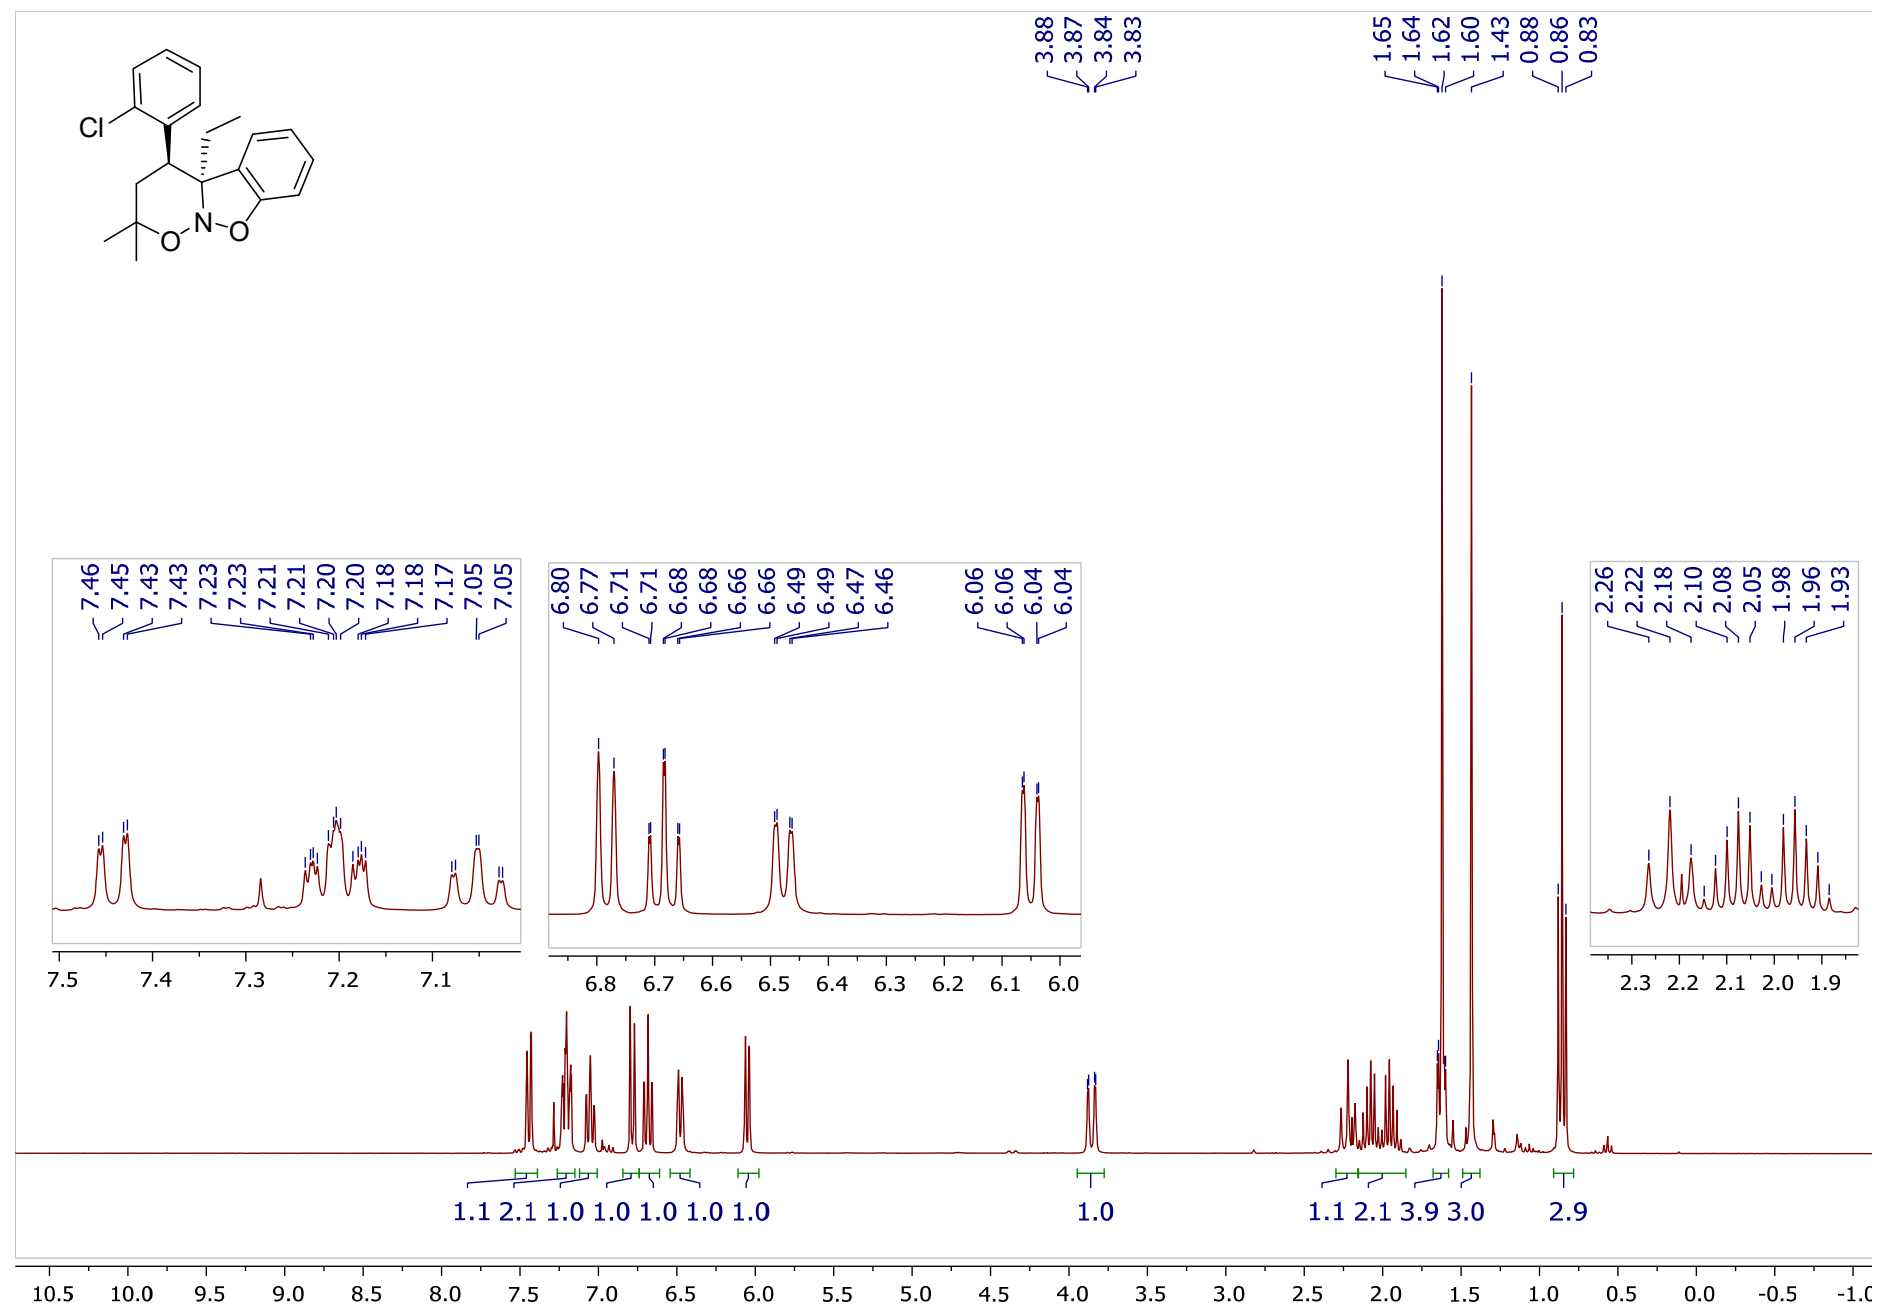



<sup>13</sup>C NMR (75 MHz, CDCl<sub>3</sub>)

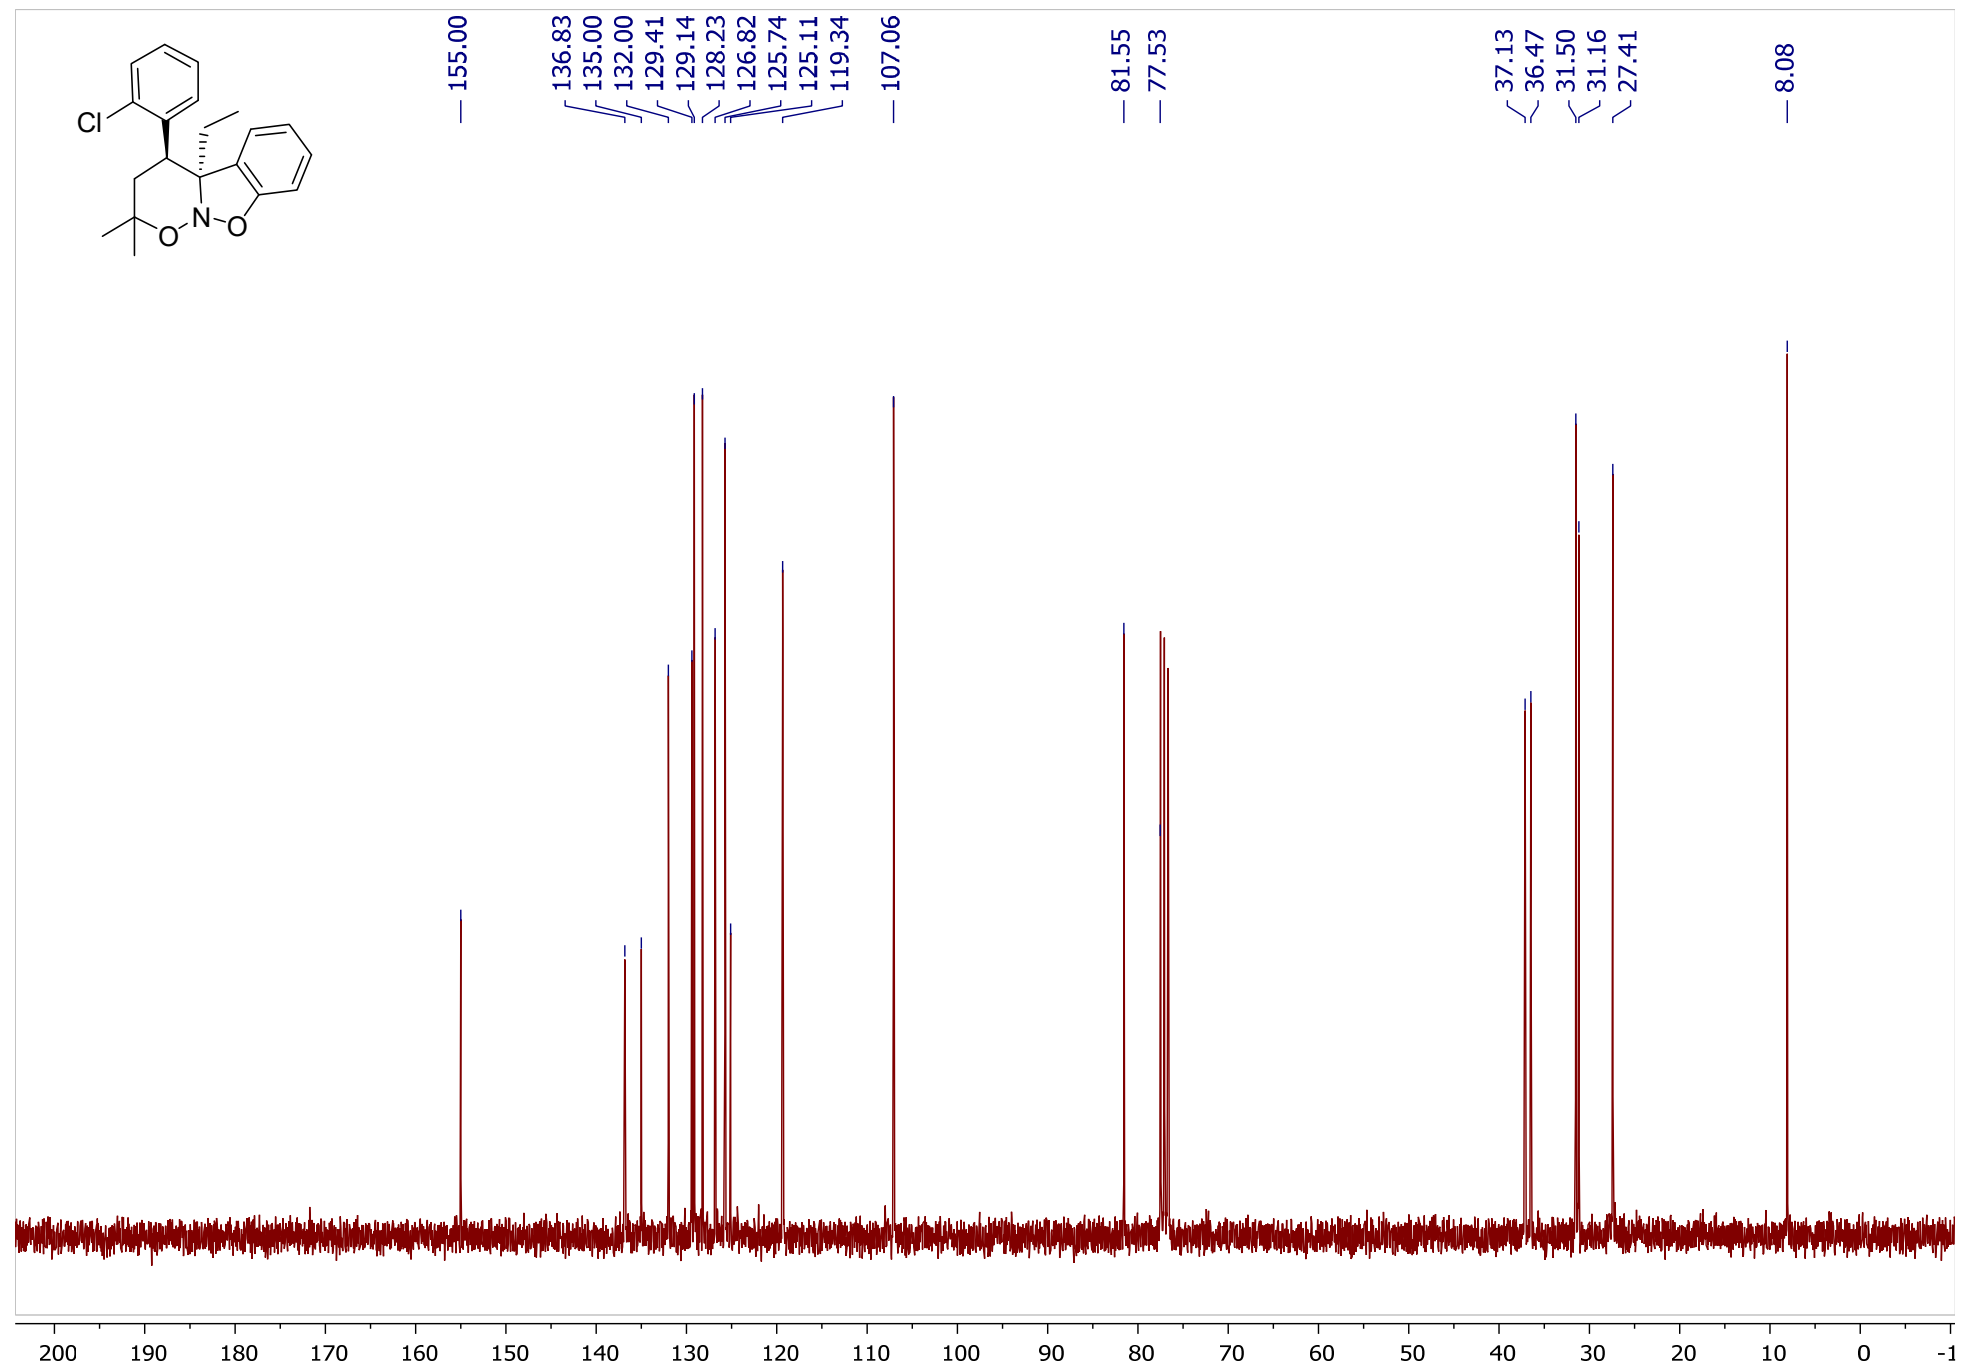

$^{13}\text{C}$  DEPT 135 (75 MHz,  $\text{CDCl}_3$ )

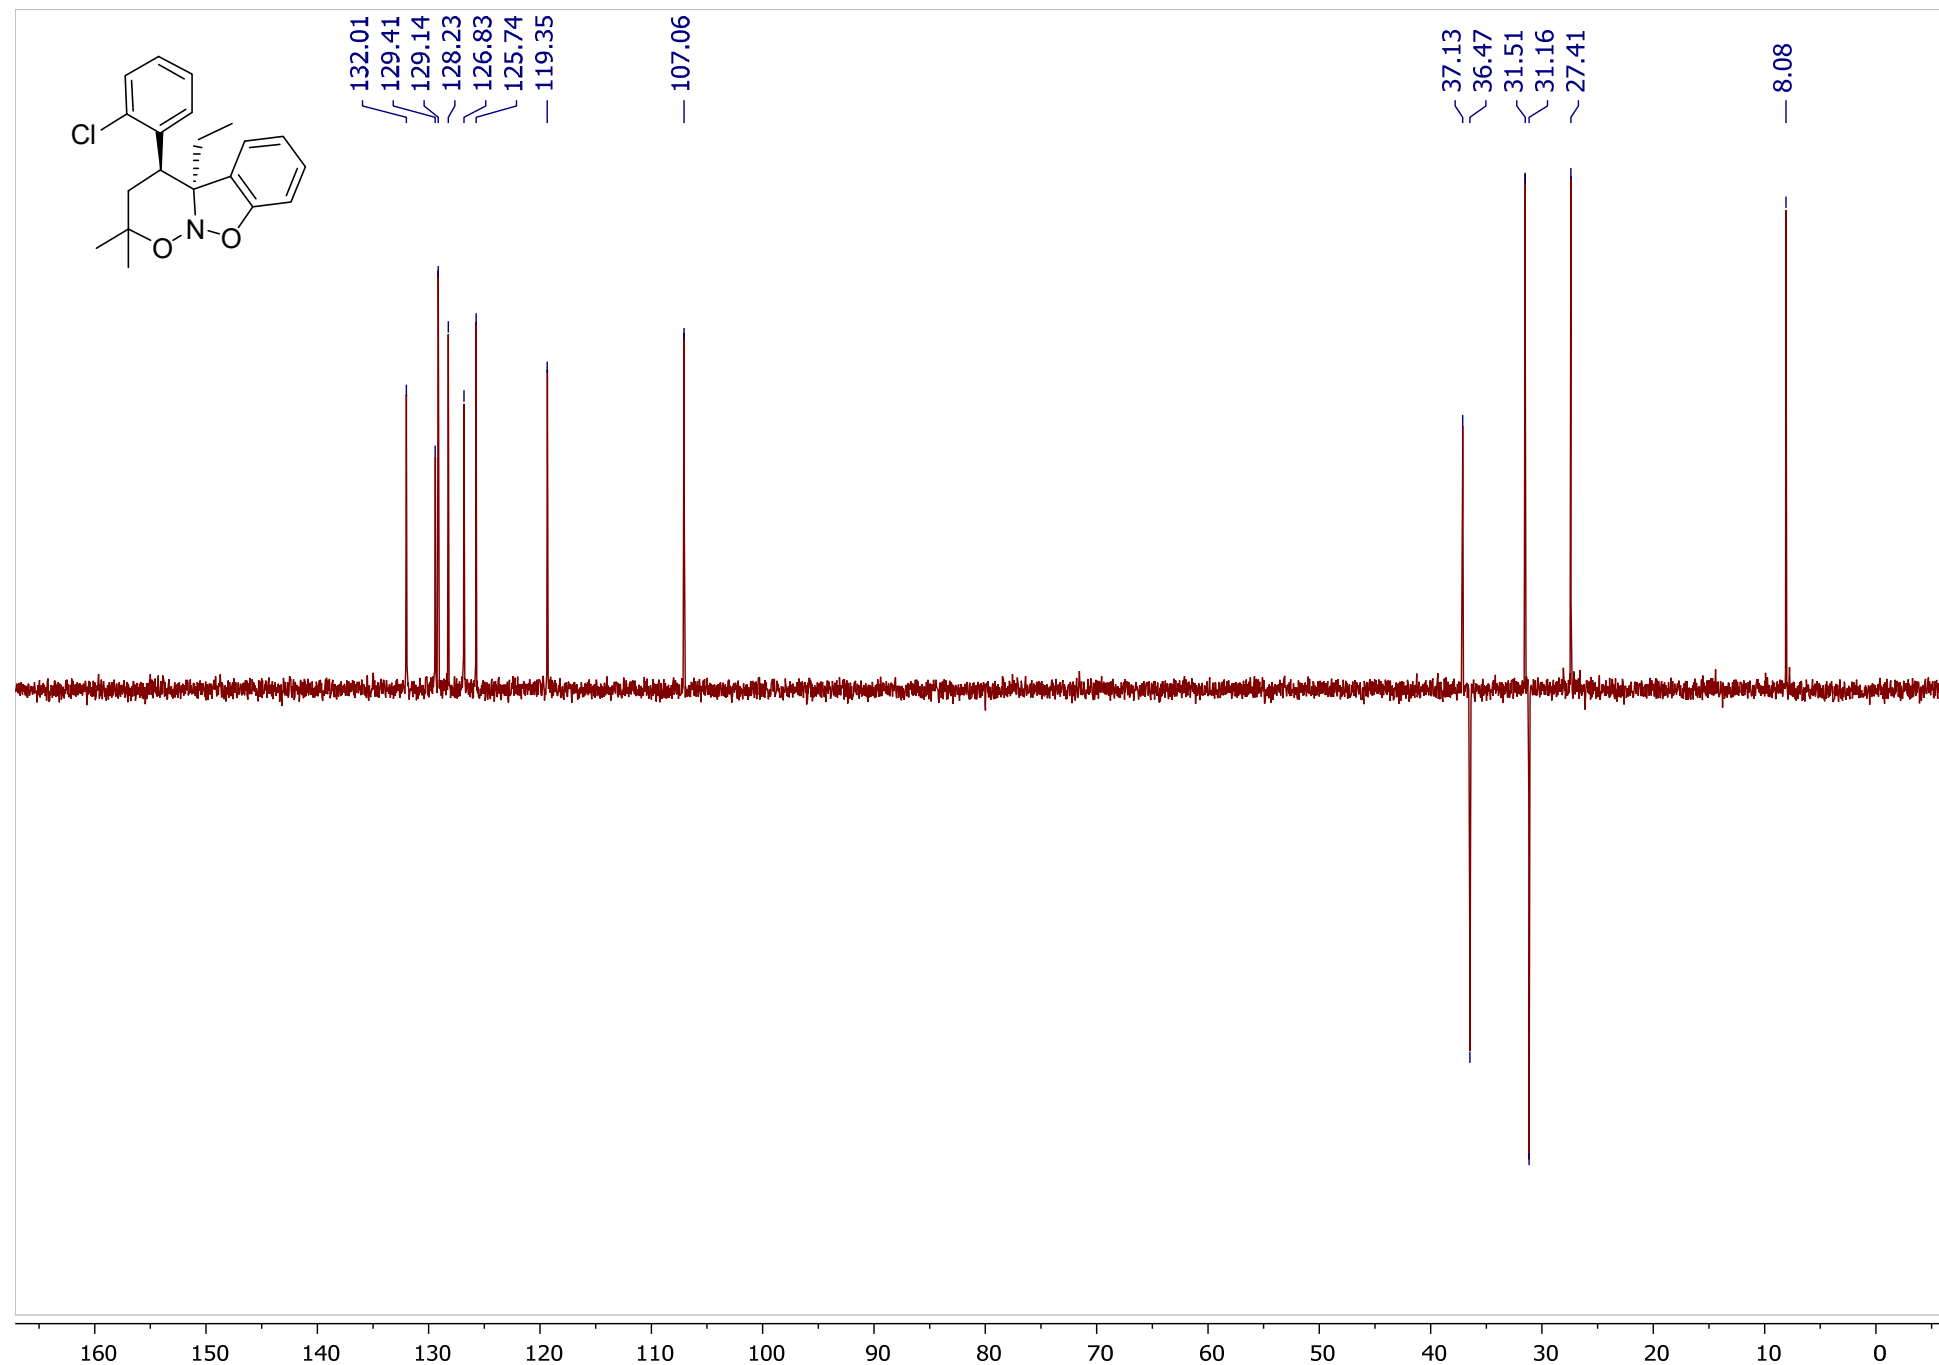

$^1\text{H}$ - $^{13}\text{C}$  HSQC

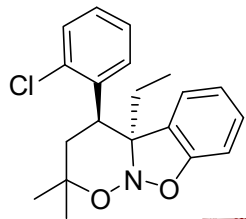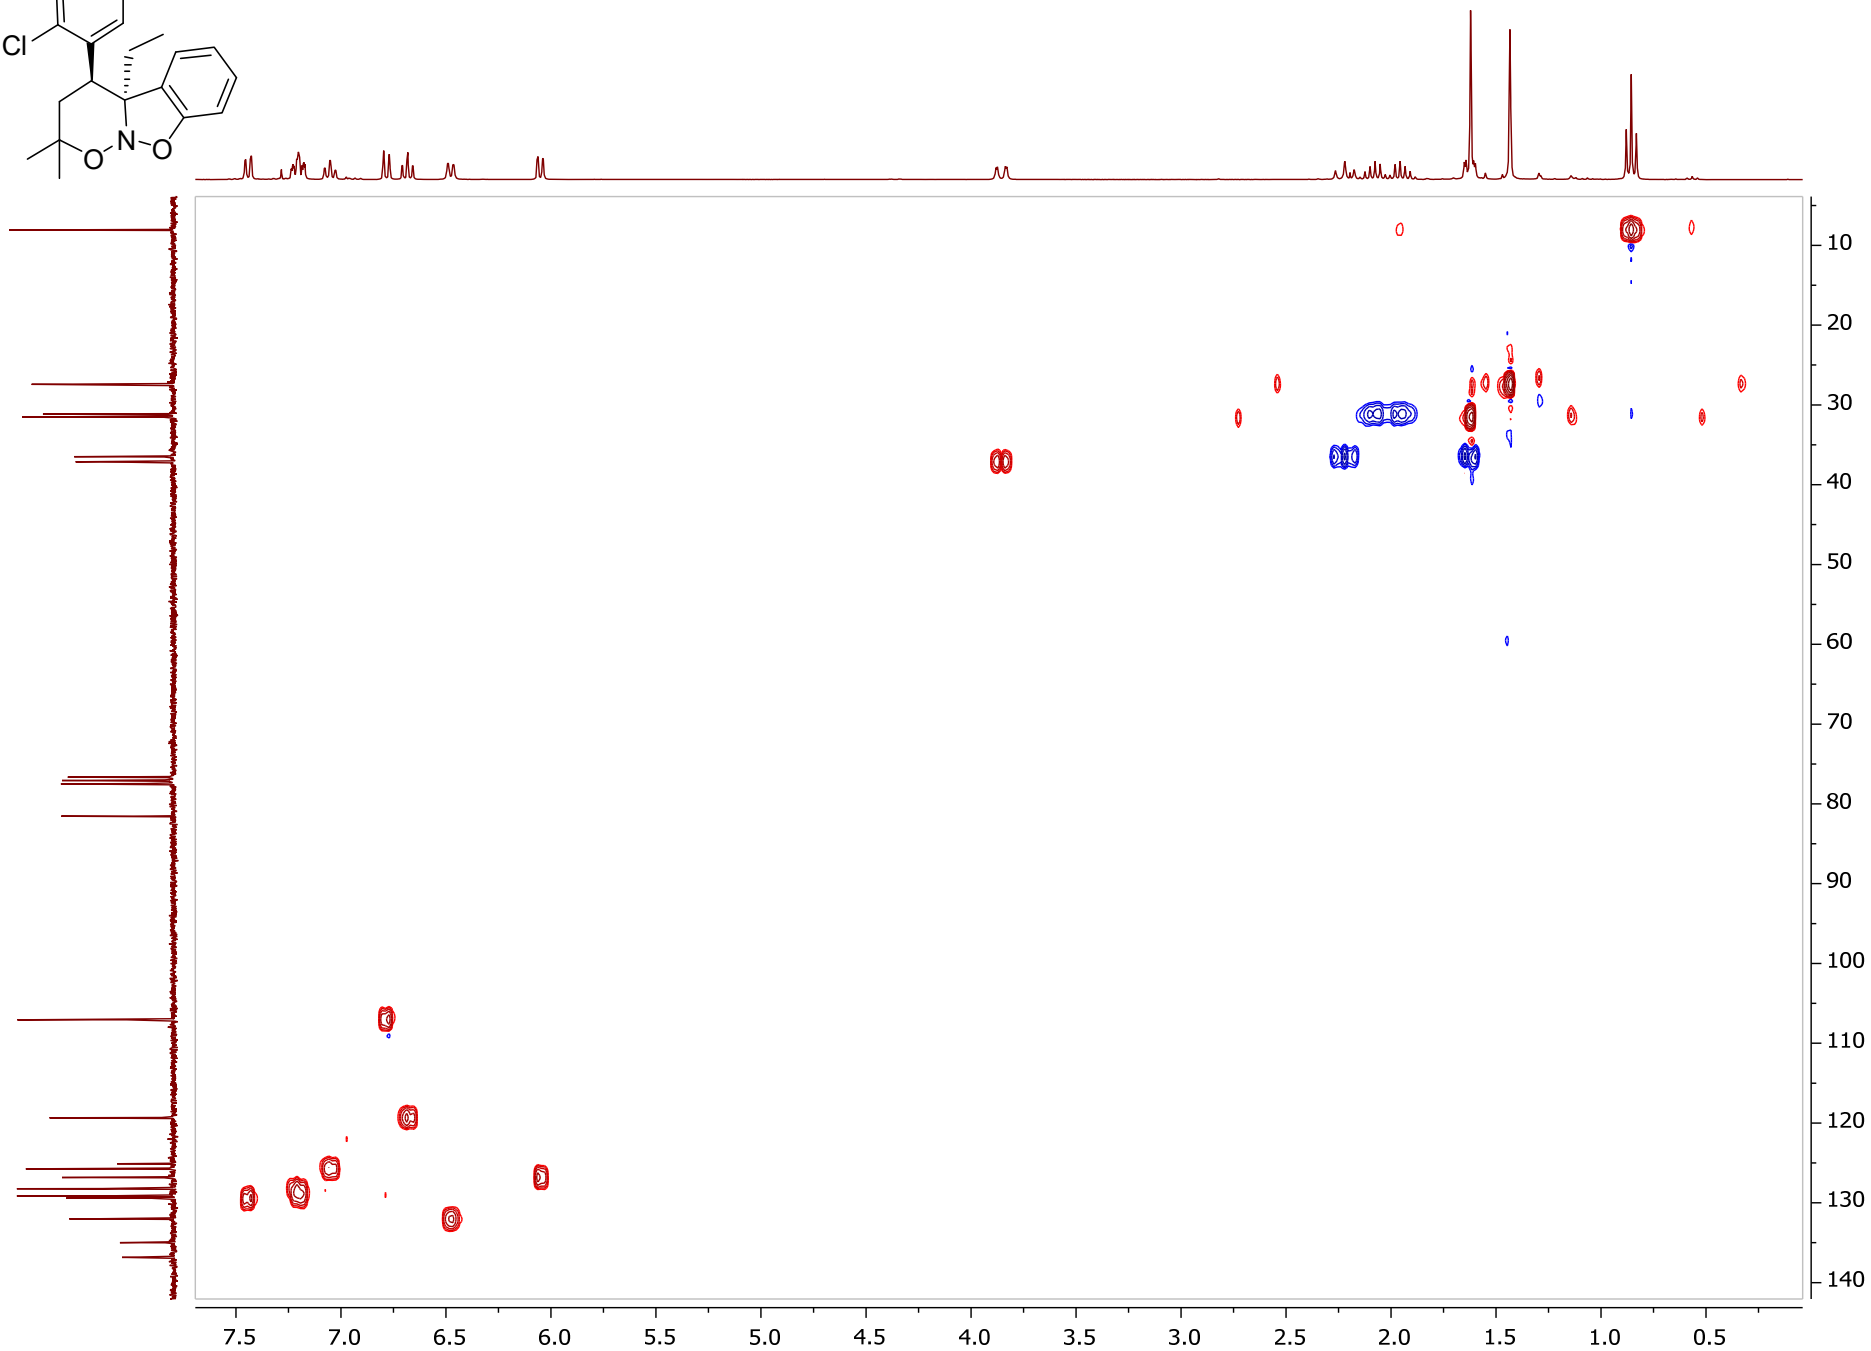

$^1\text{H}$ - $^{13}\text{C}$  HMBC

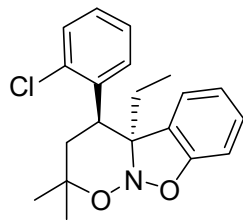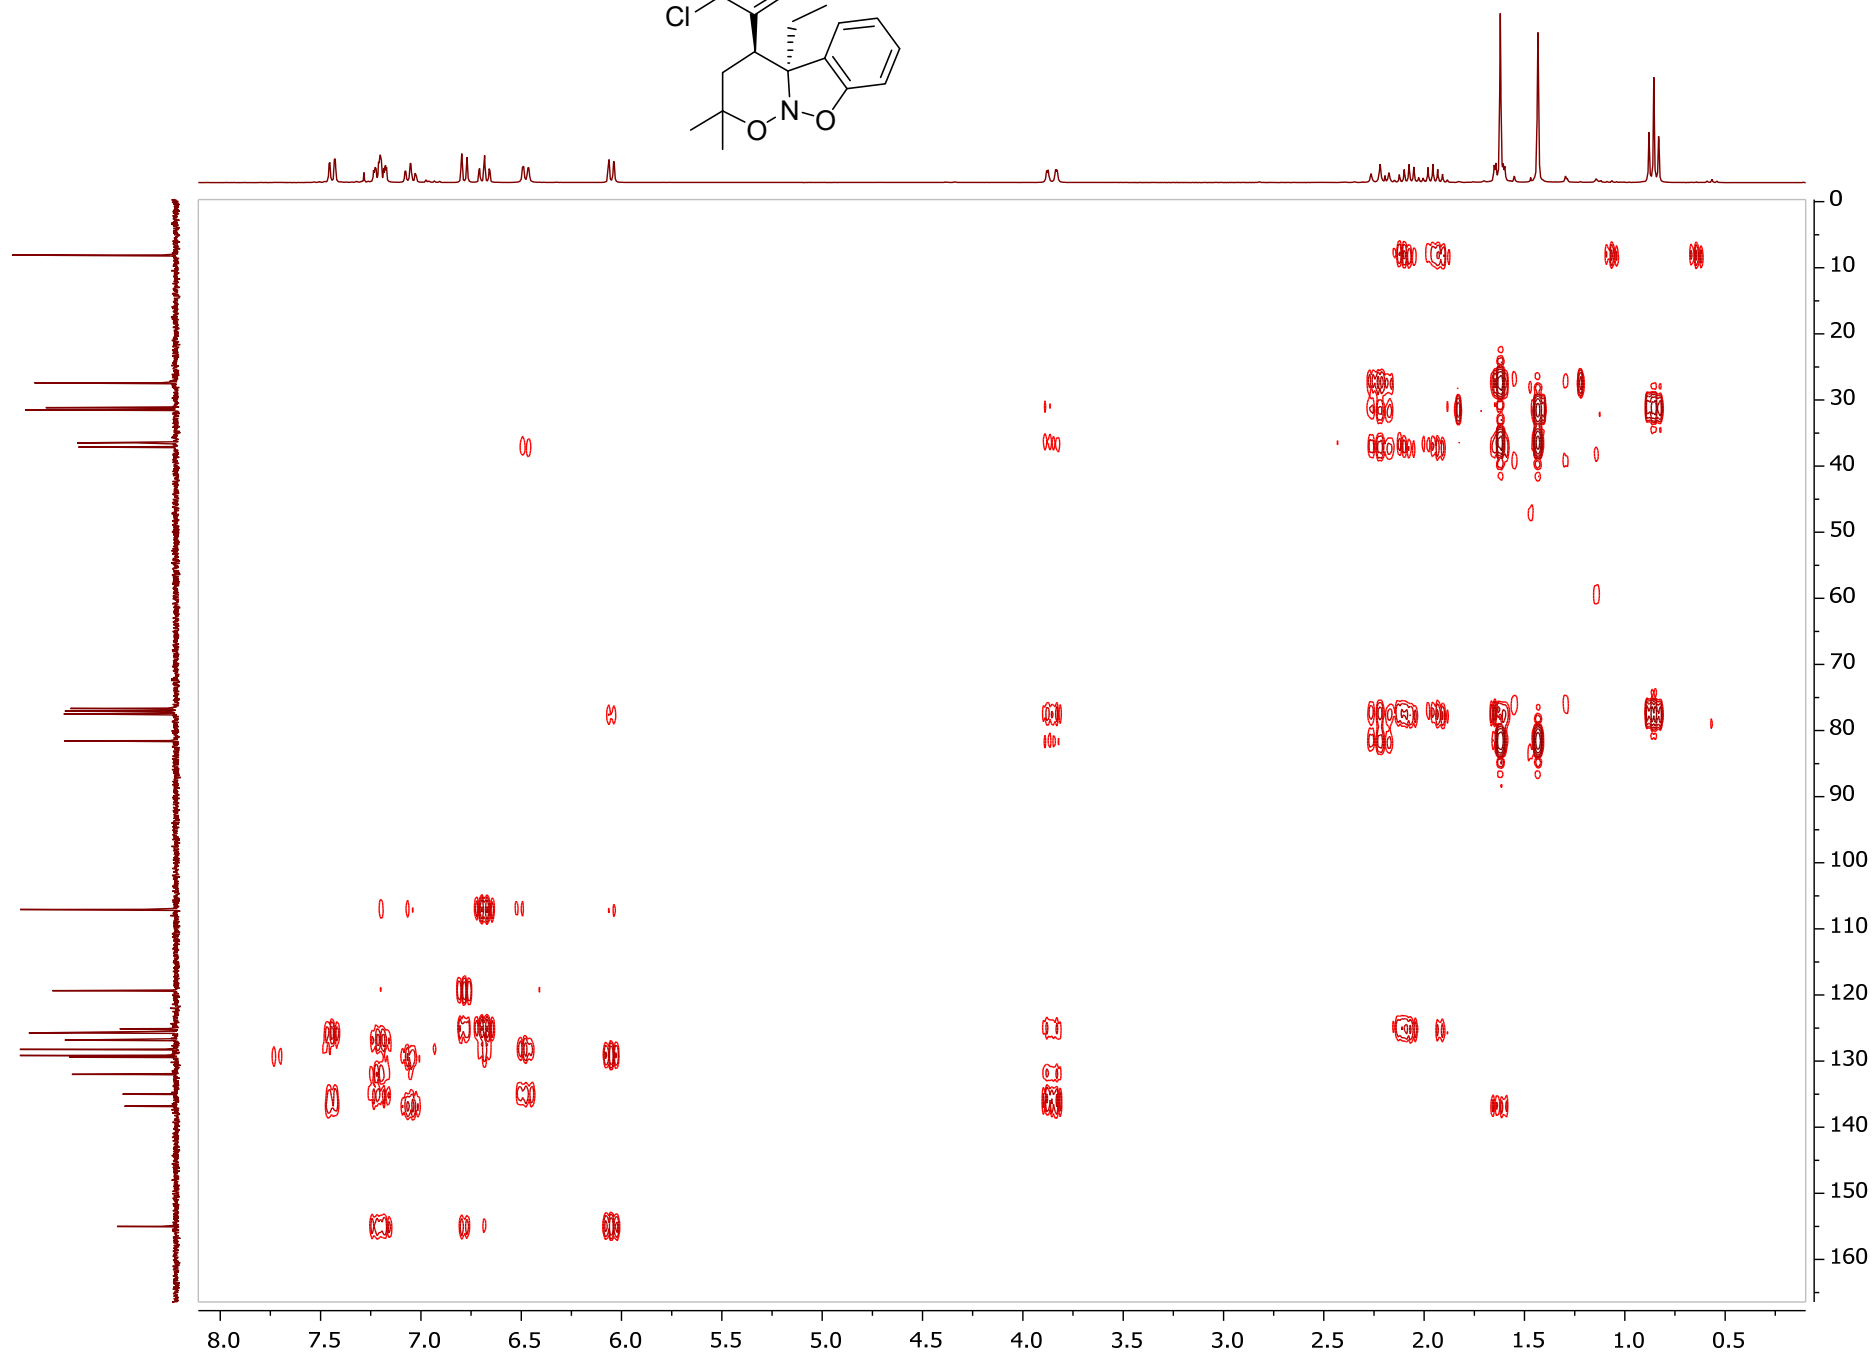

$^1\text{H}$ - $^1\text{H}$  NOESY

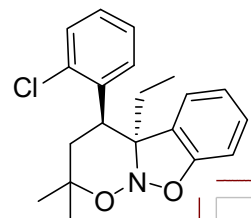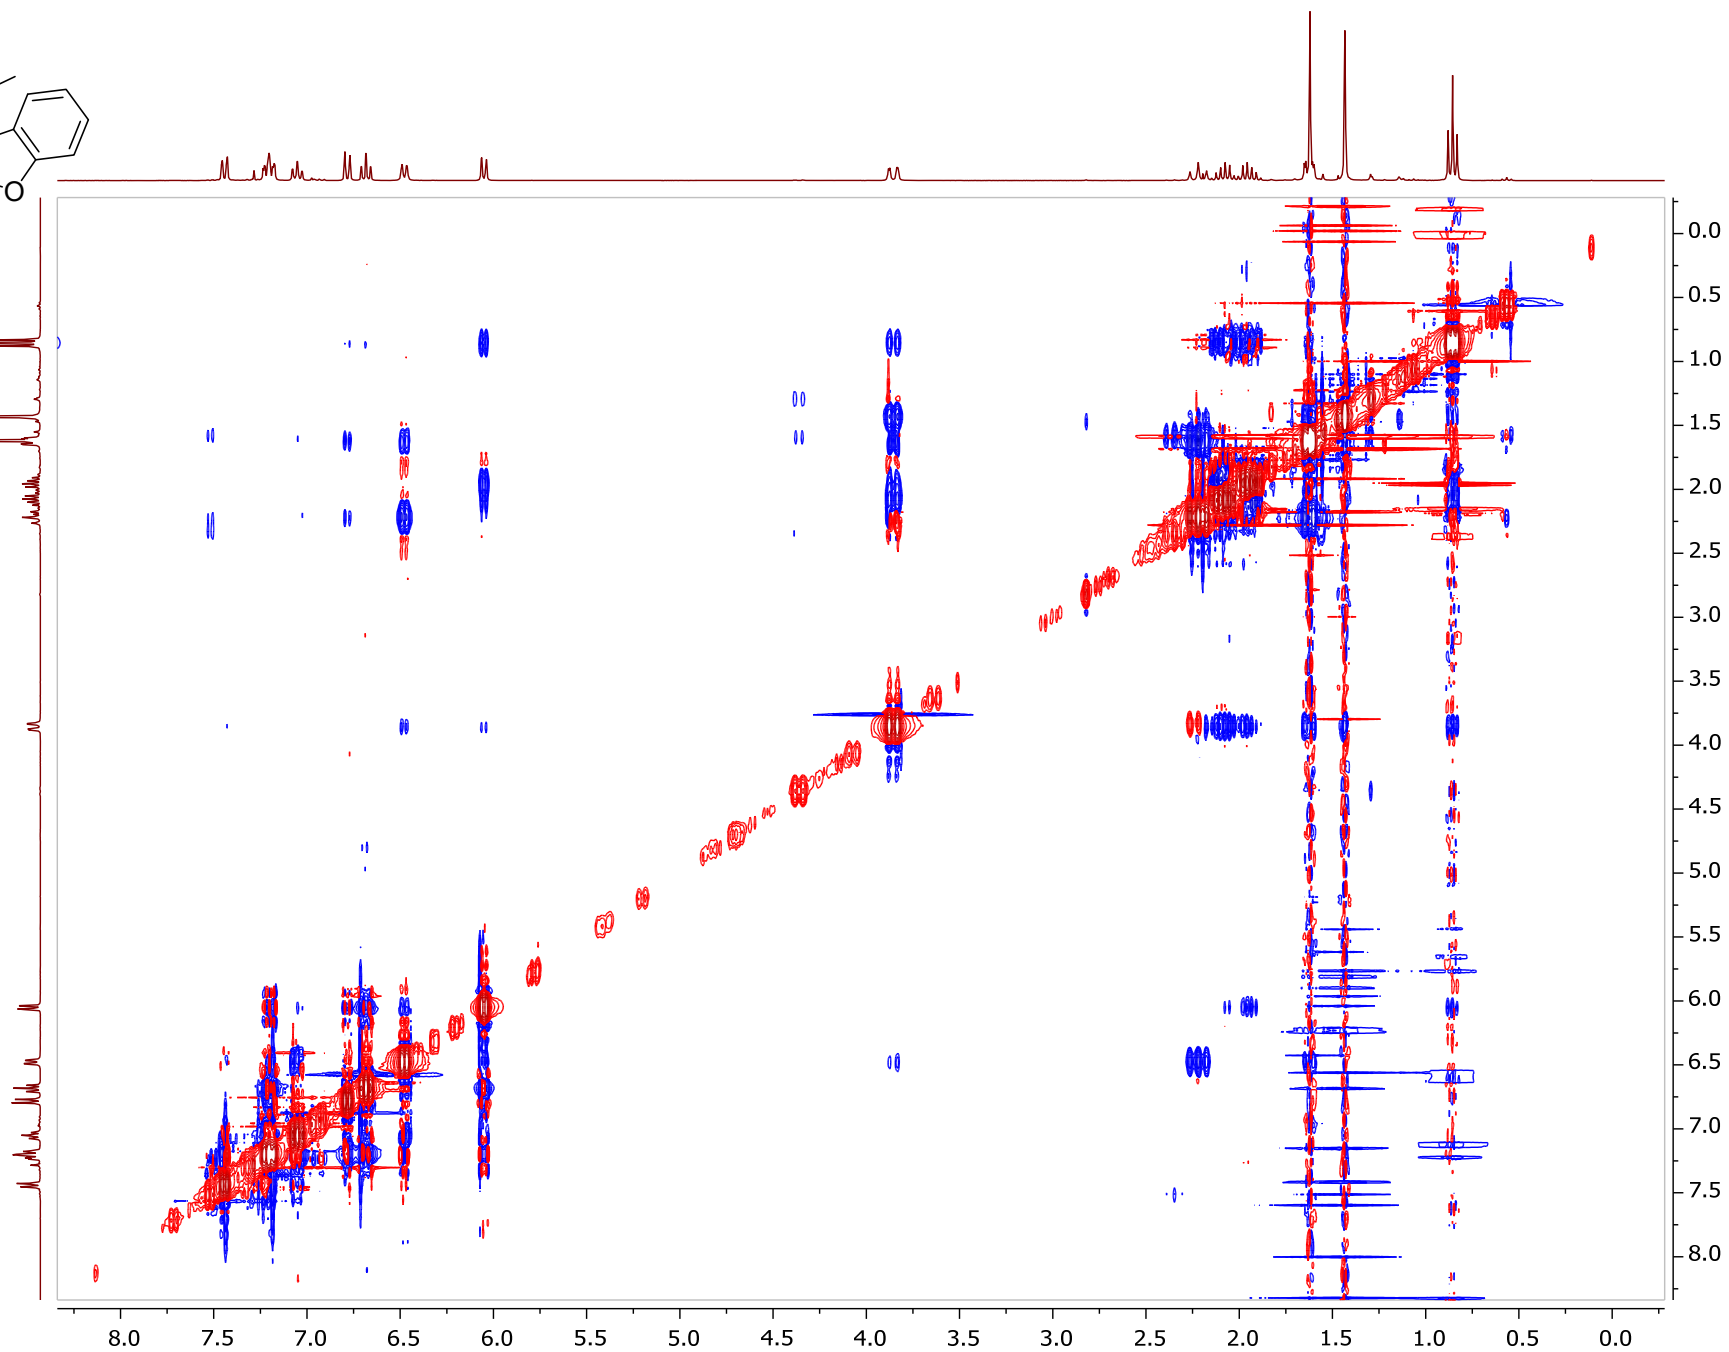

**(4*R*\*,4*aS*\*)-4a-Ethyl-2,2-dimethyl-2,3,4a-tetrahydrobenzo[4,5]isoxazolo[2,3-b][1,2]oxazin-4-yl benzoate 5ga, major / minor = 9:1**

<sup>1</sup>H NMR (300 MHz, CDCl<sub>3</sub>)

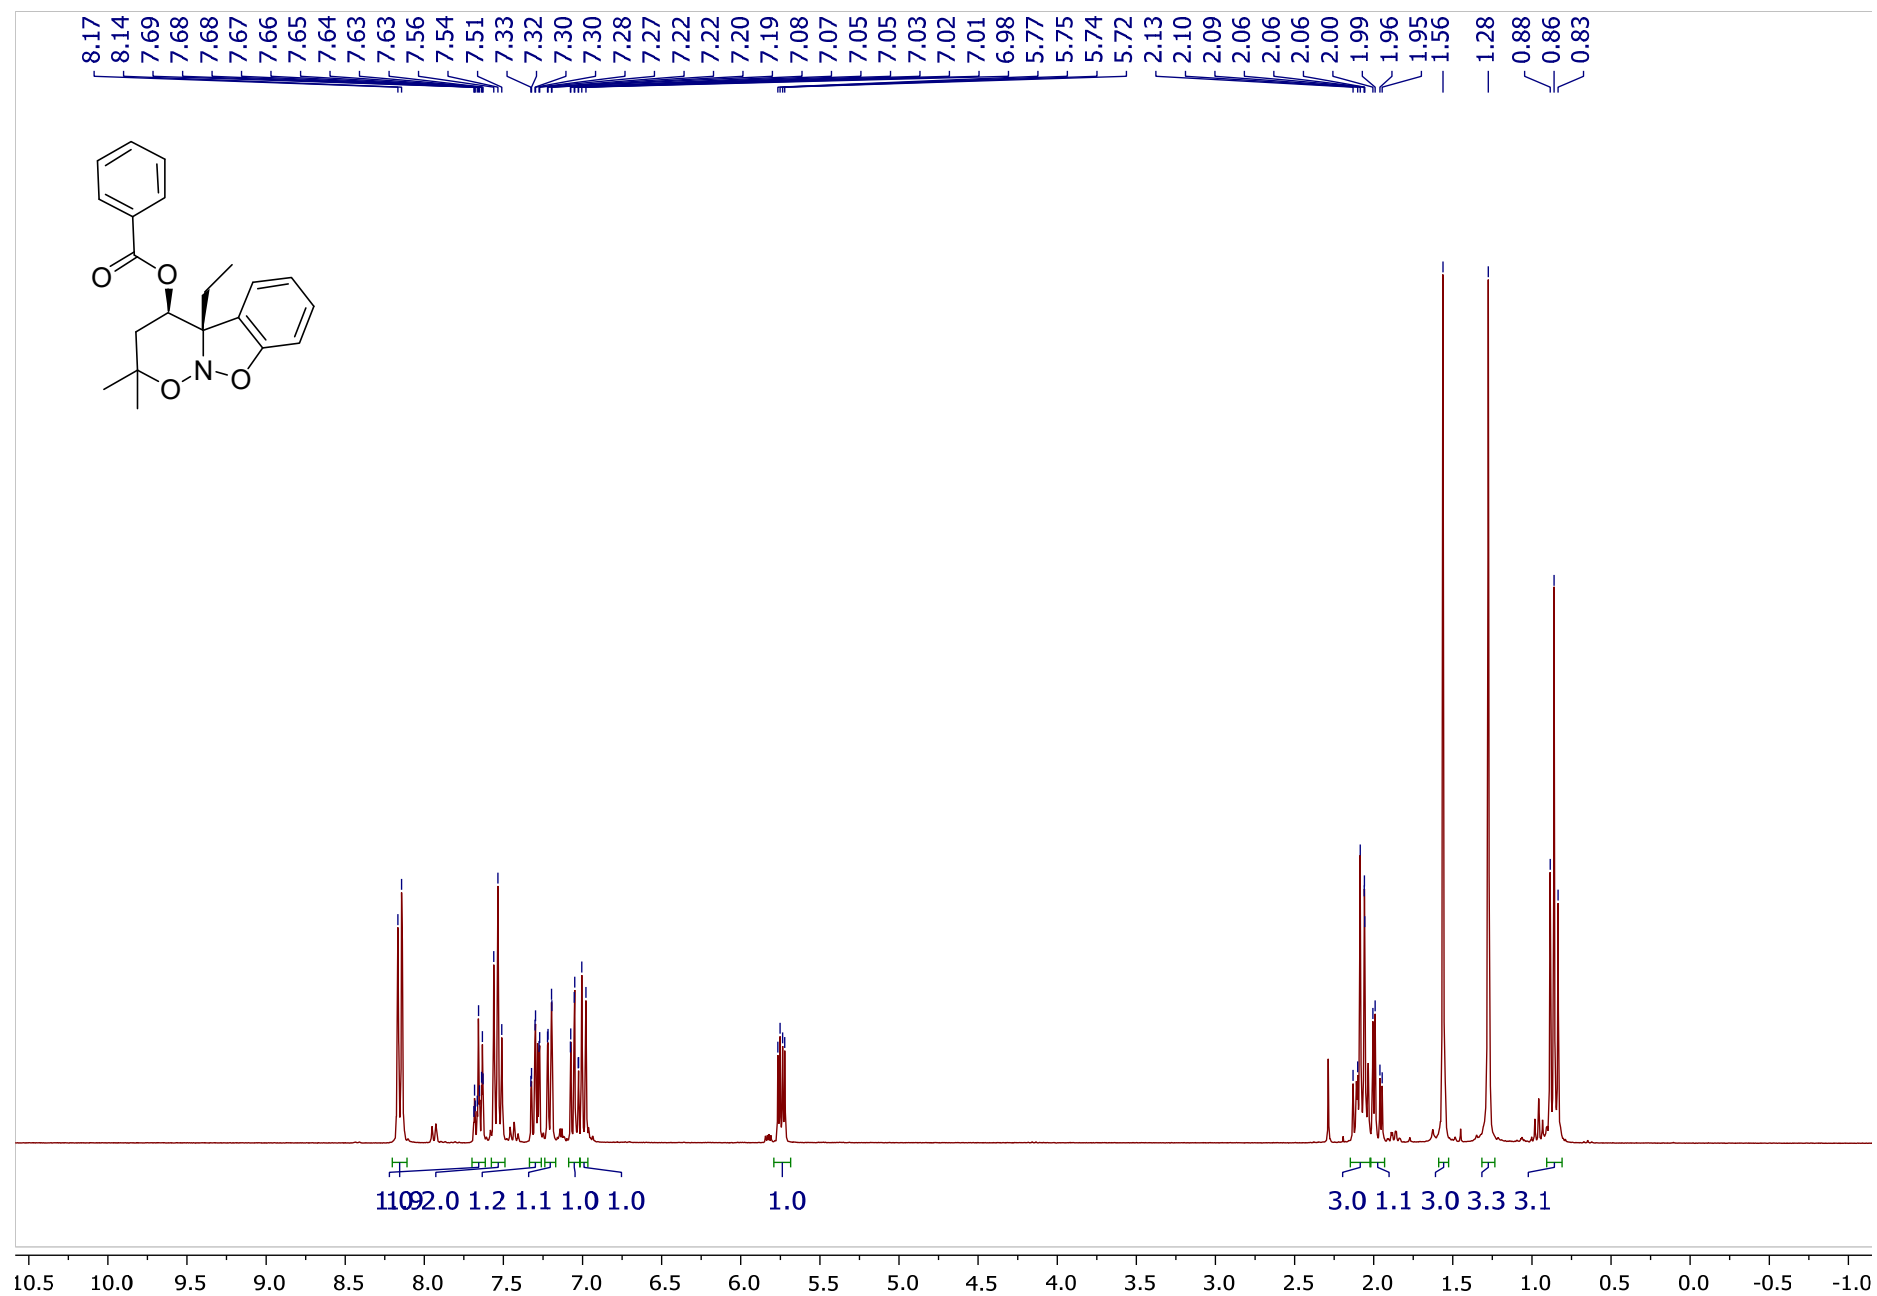

<sup>13</sup>C NMR (75 MHz, CDCl<sub>3</sub>)

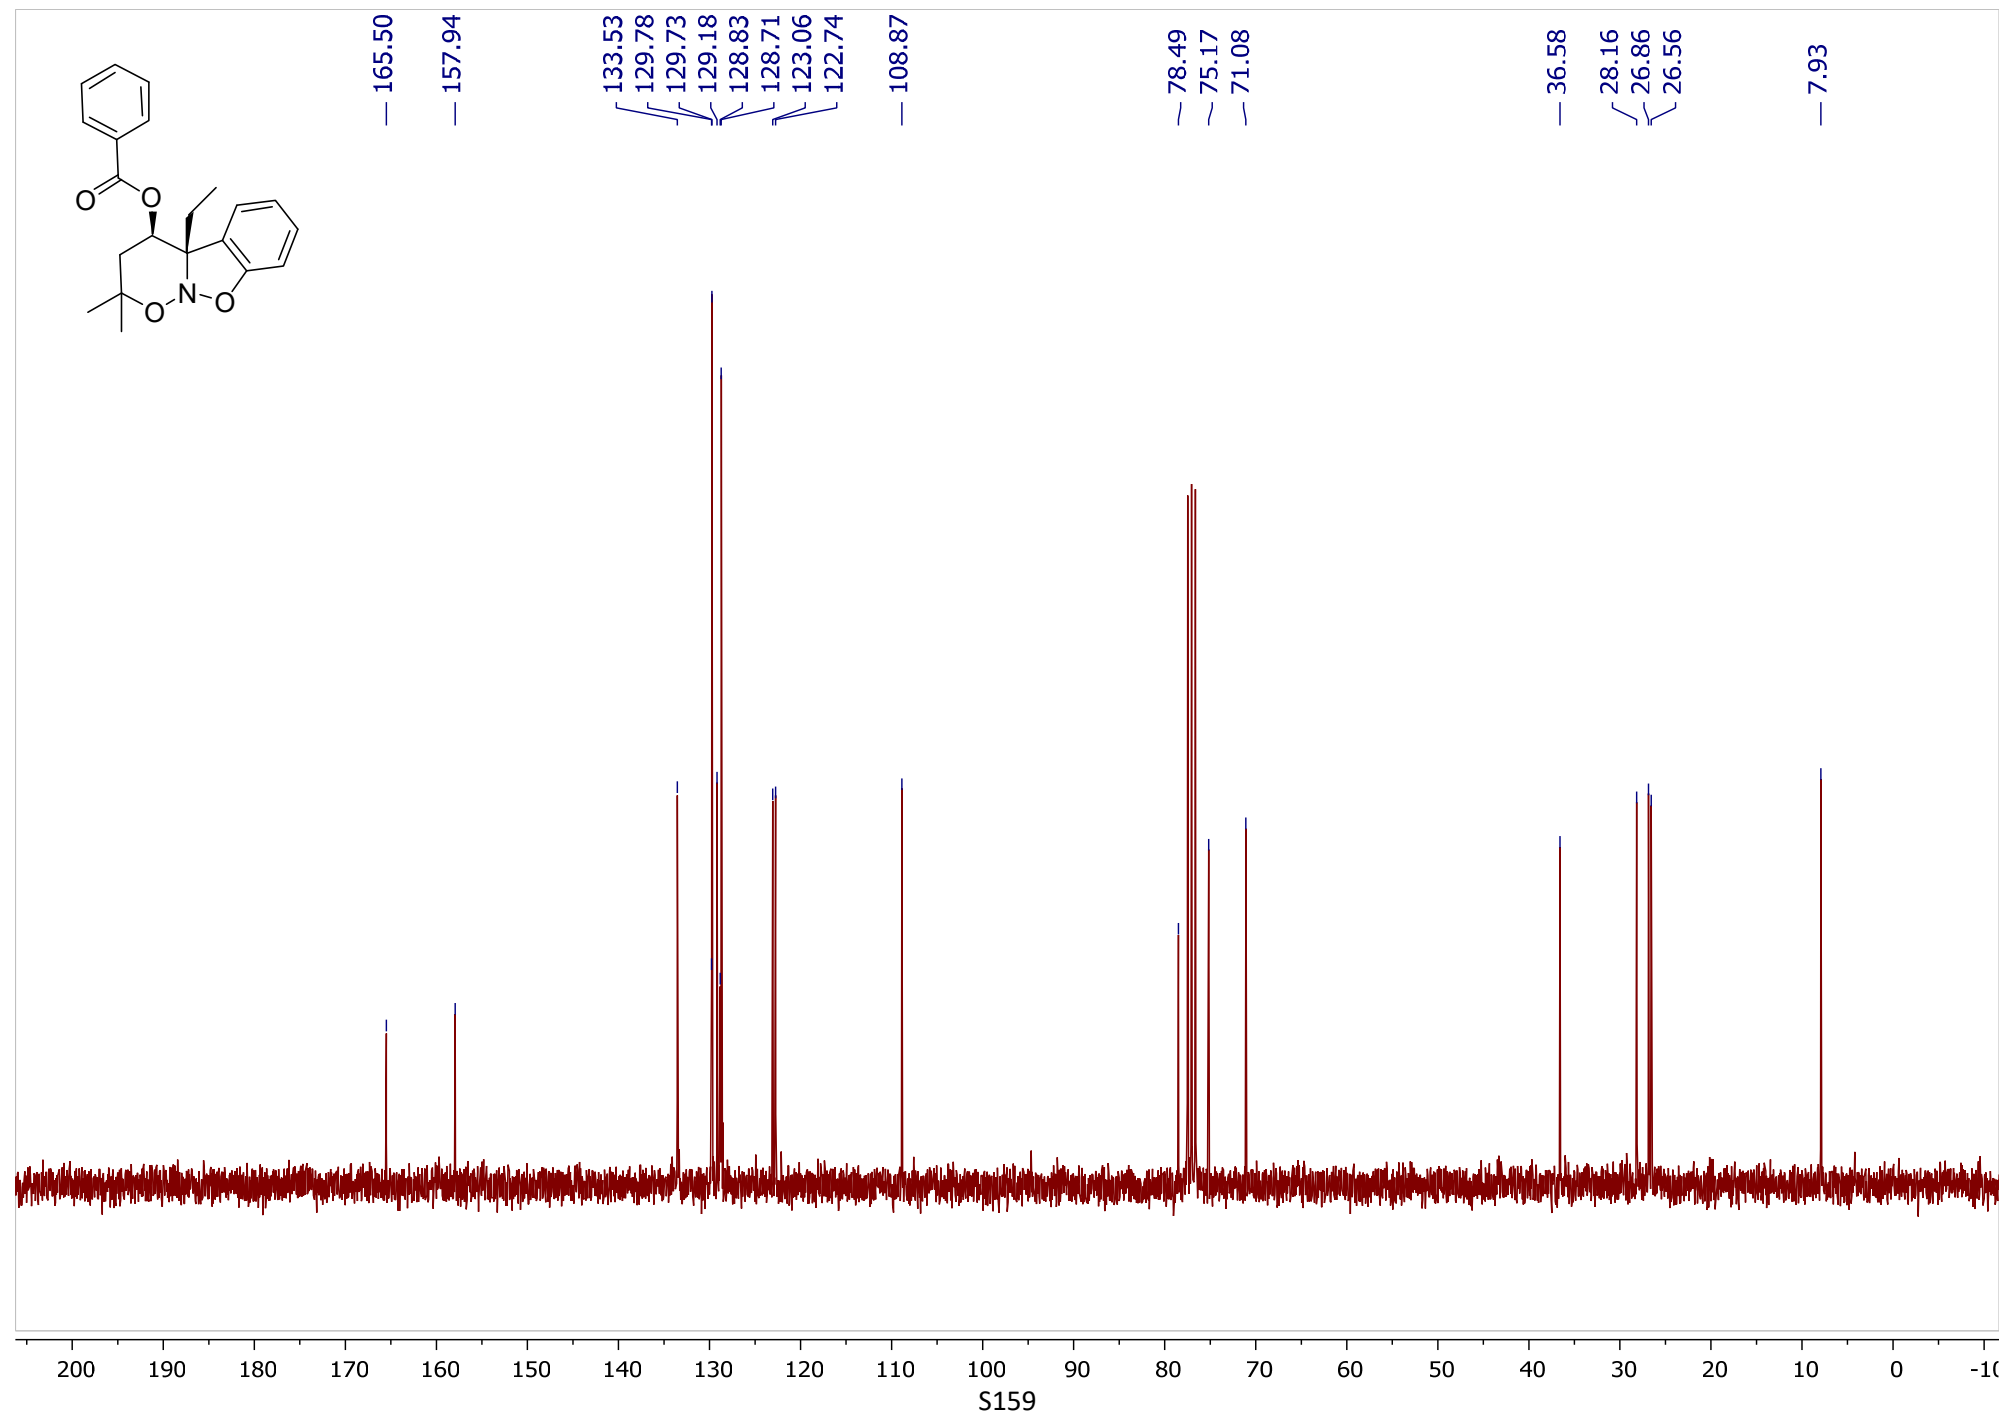

$^{13}\text{C}$  DEPT 135 (75 MHz,  $\text{CDCl}_3$ )

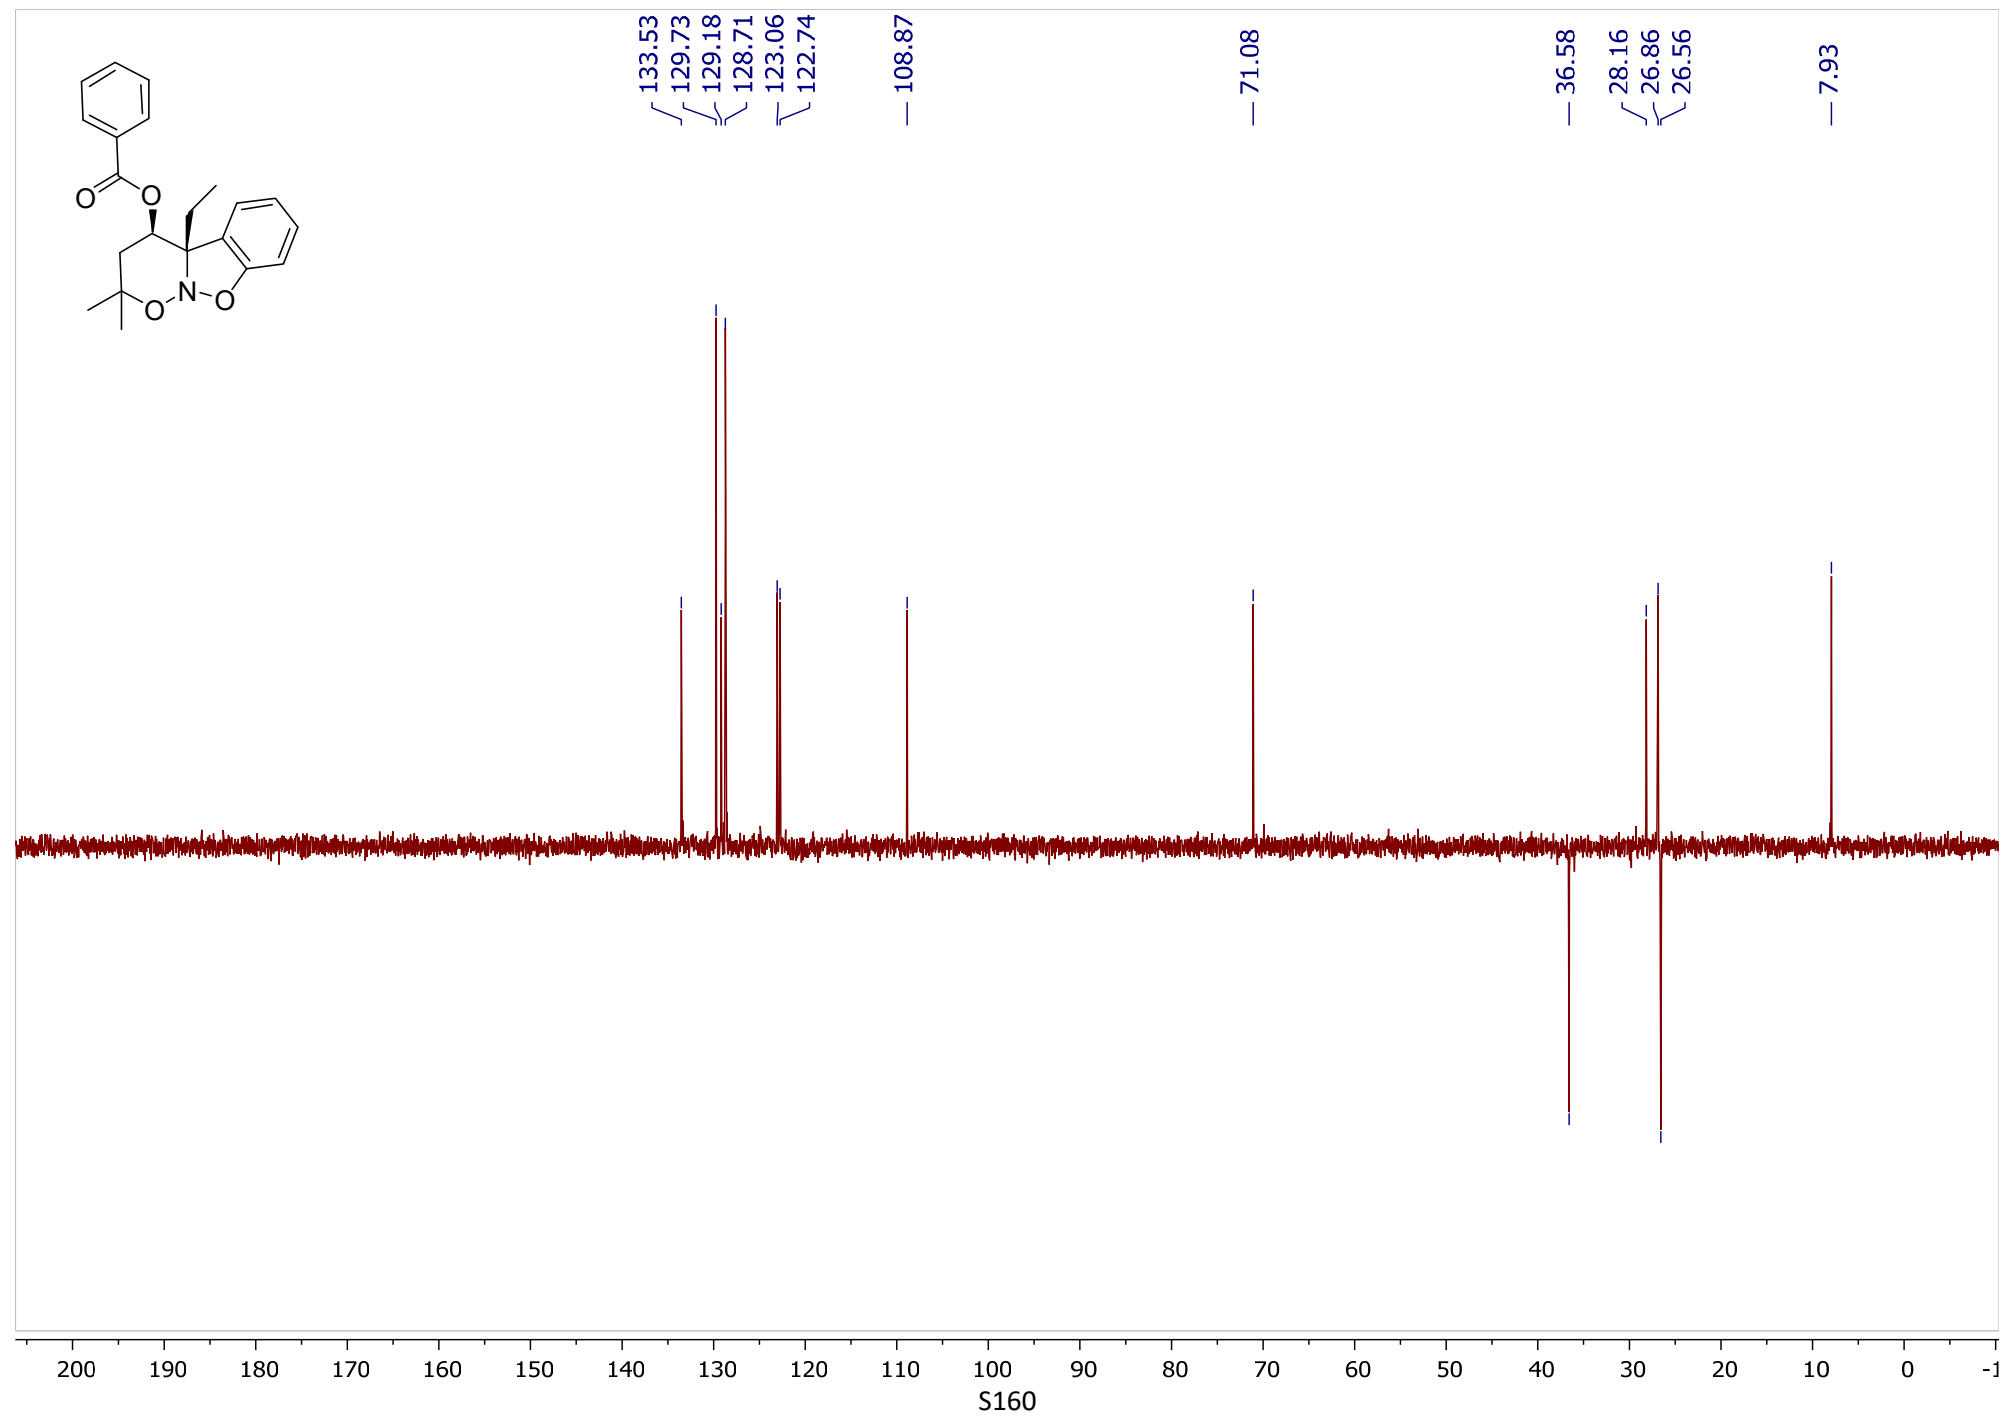



(4*R*\*,4*aS*\*)-4*a*-Ethyl-2,2-dimethyl-2,3,4*a*-tetrahydrobenzo[4,5]isoxazolo[2,3-*b*][1,2]oxazin-4-yl benzoate **5ga**, major / minor = 1:1

<sup>1</sup>H NMR (300 MHz, CDCl<sub>3</sub>)

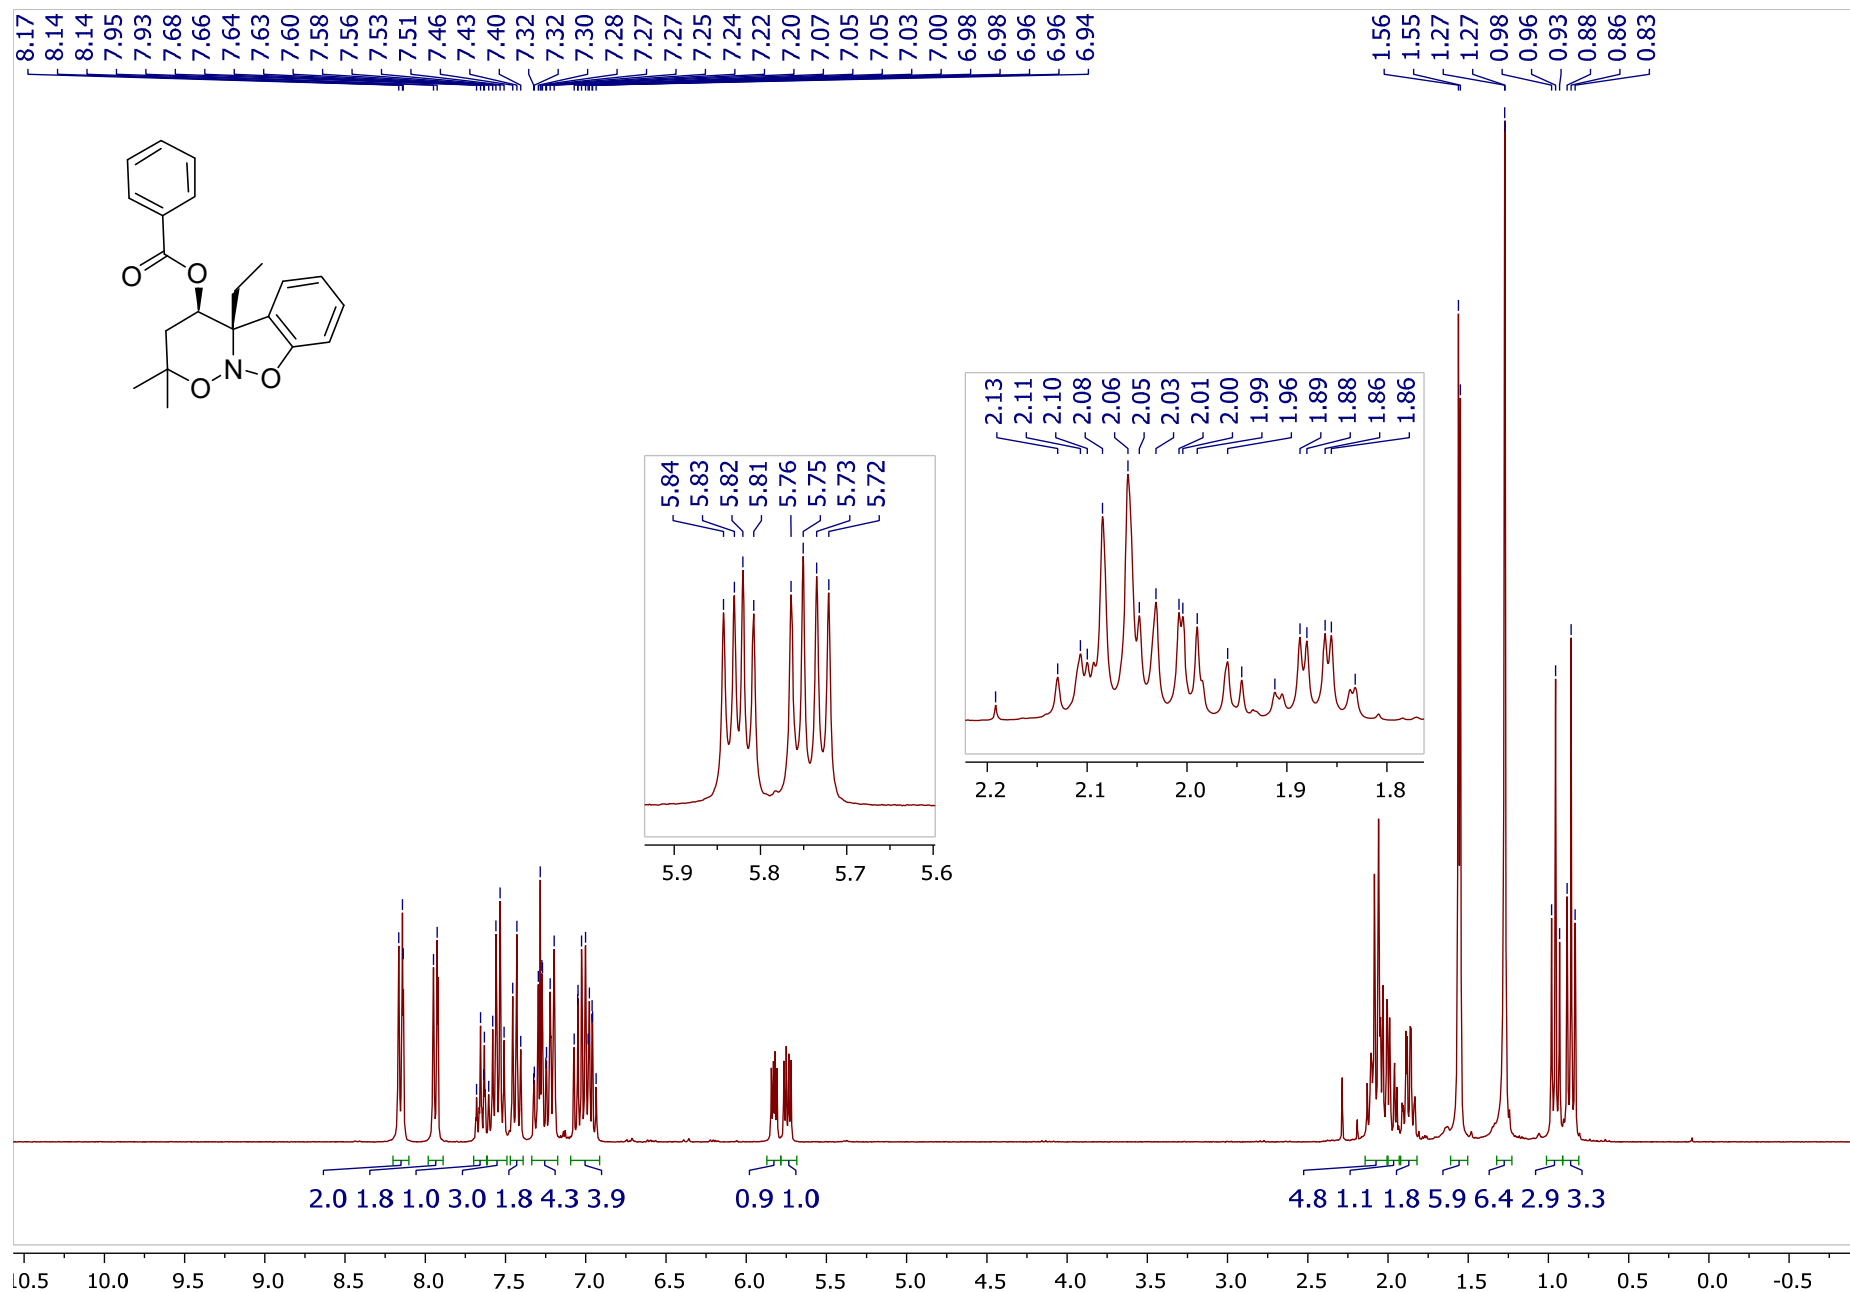

<sup>13</sup>C NMR (75 MHz, CDCl<sub>3</sub>)

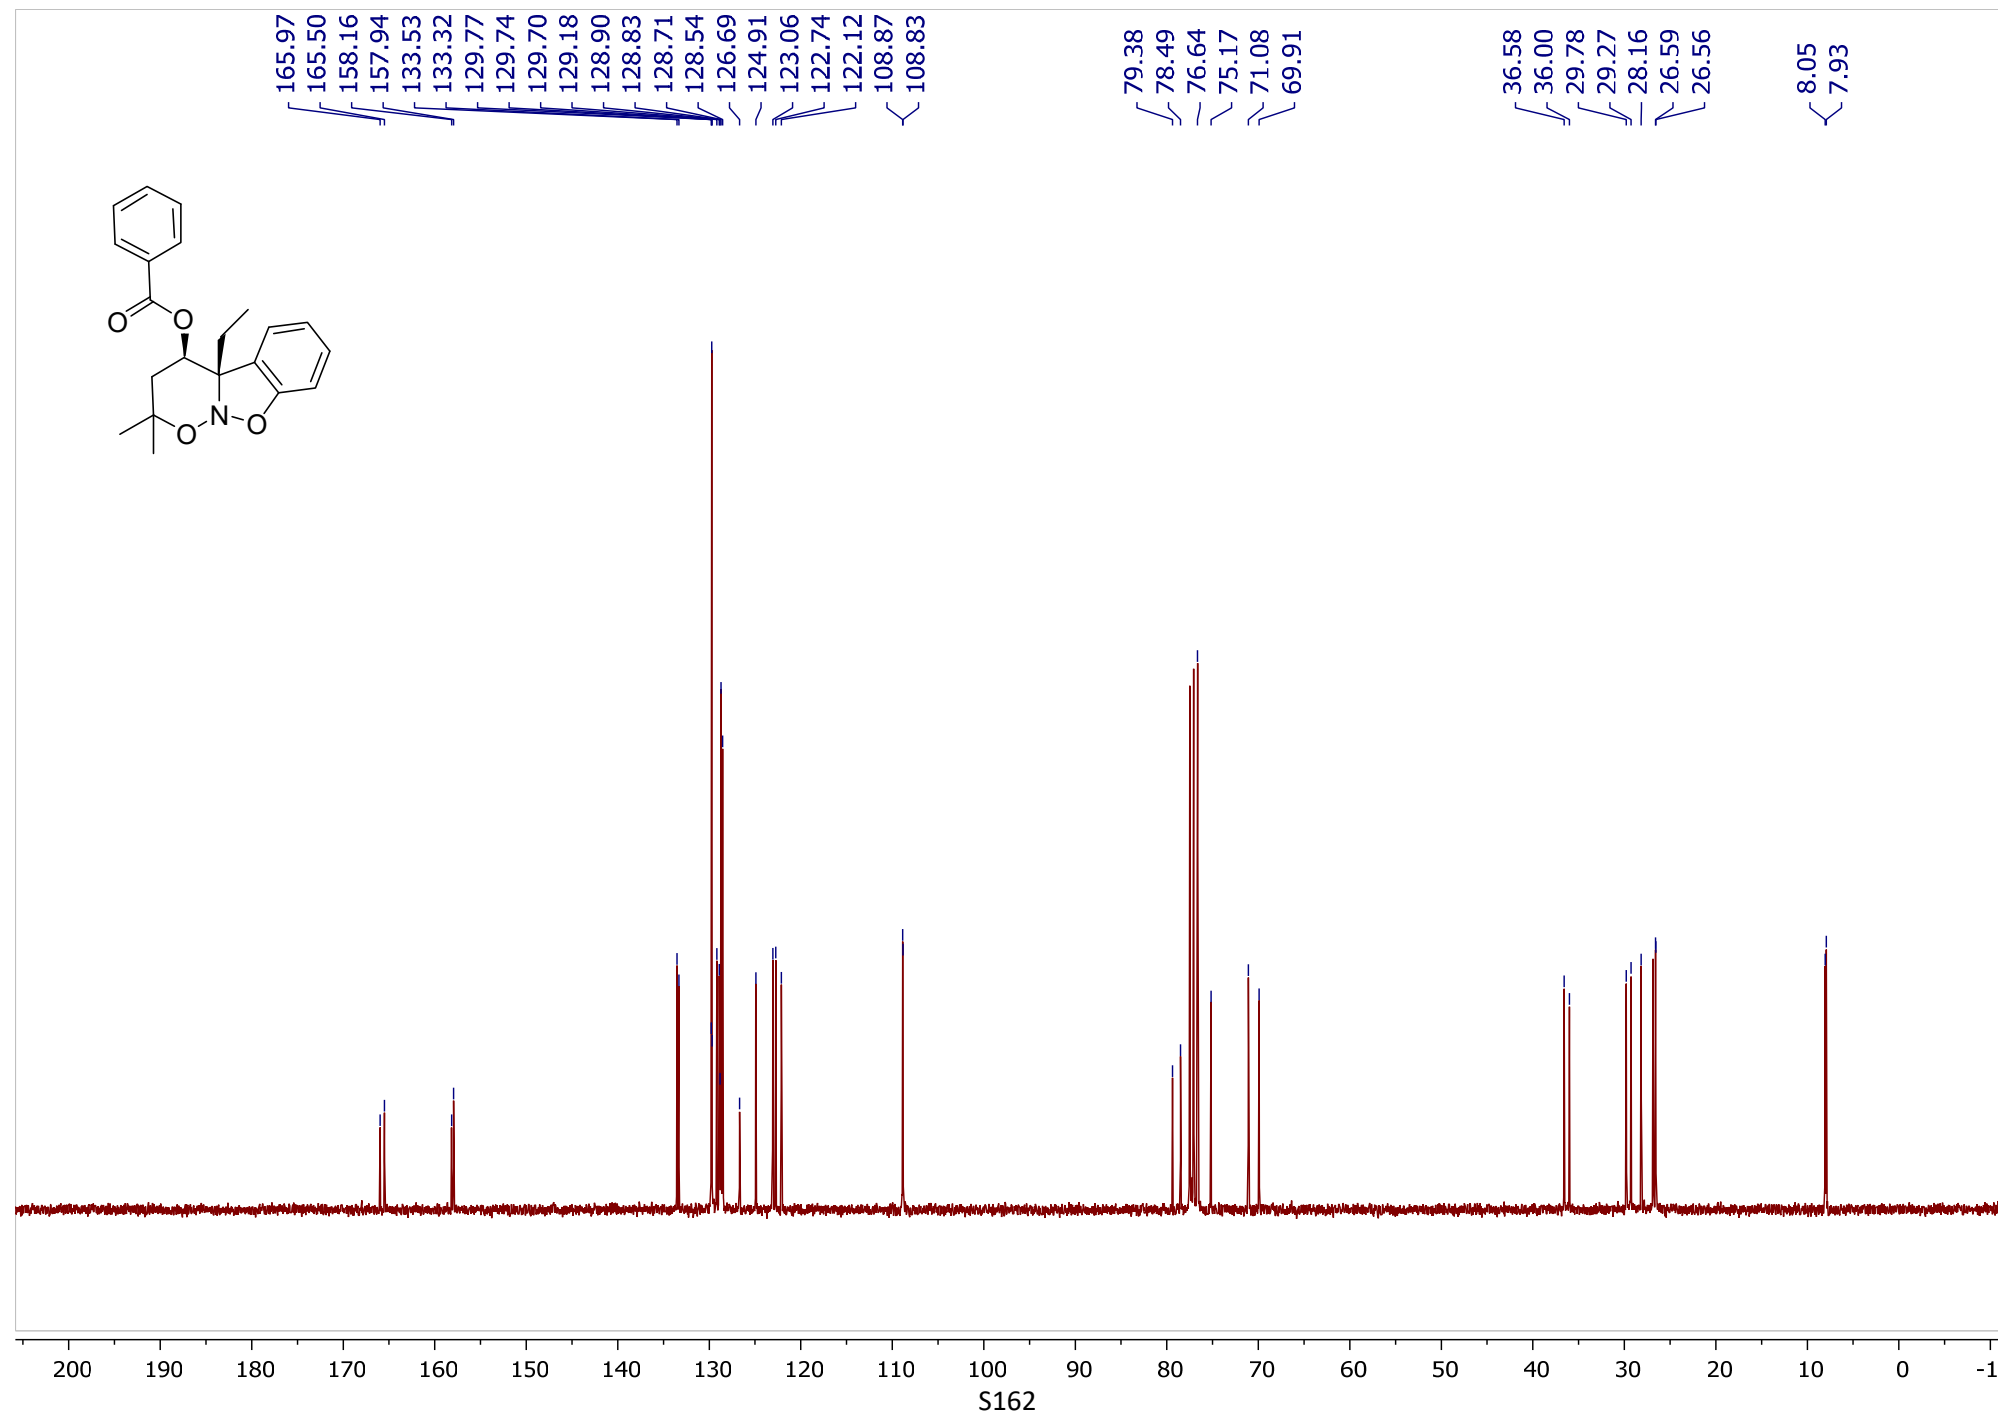

$^{13}\text{C}$  DEPT 135 (75 MHz,  $\text{CDCl}_3$ )

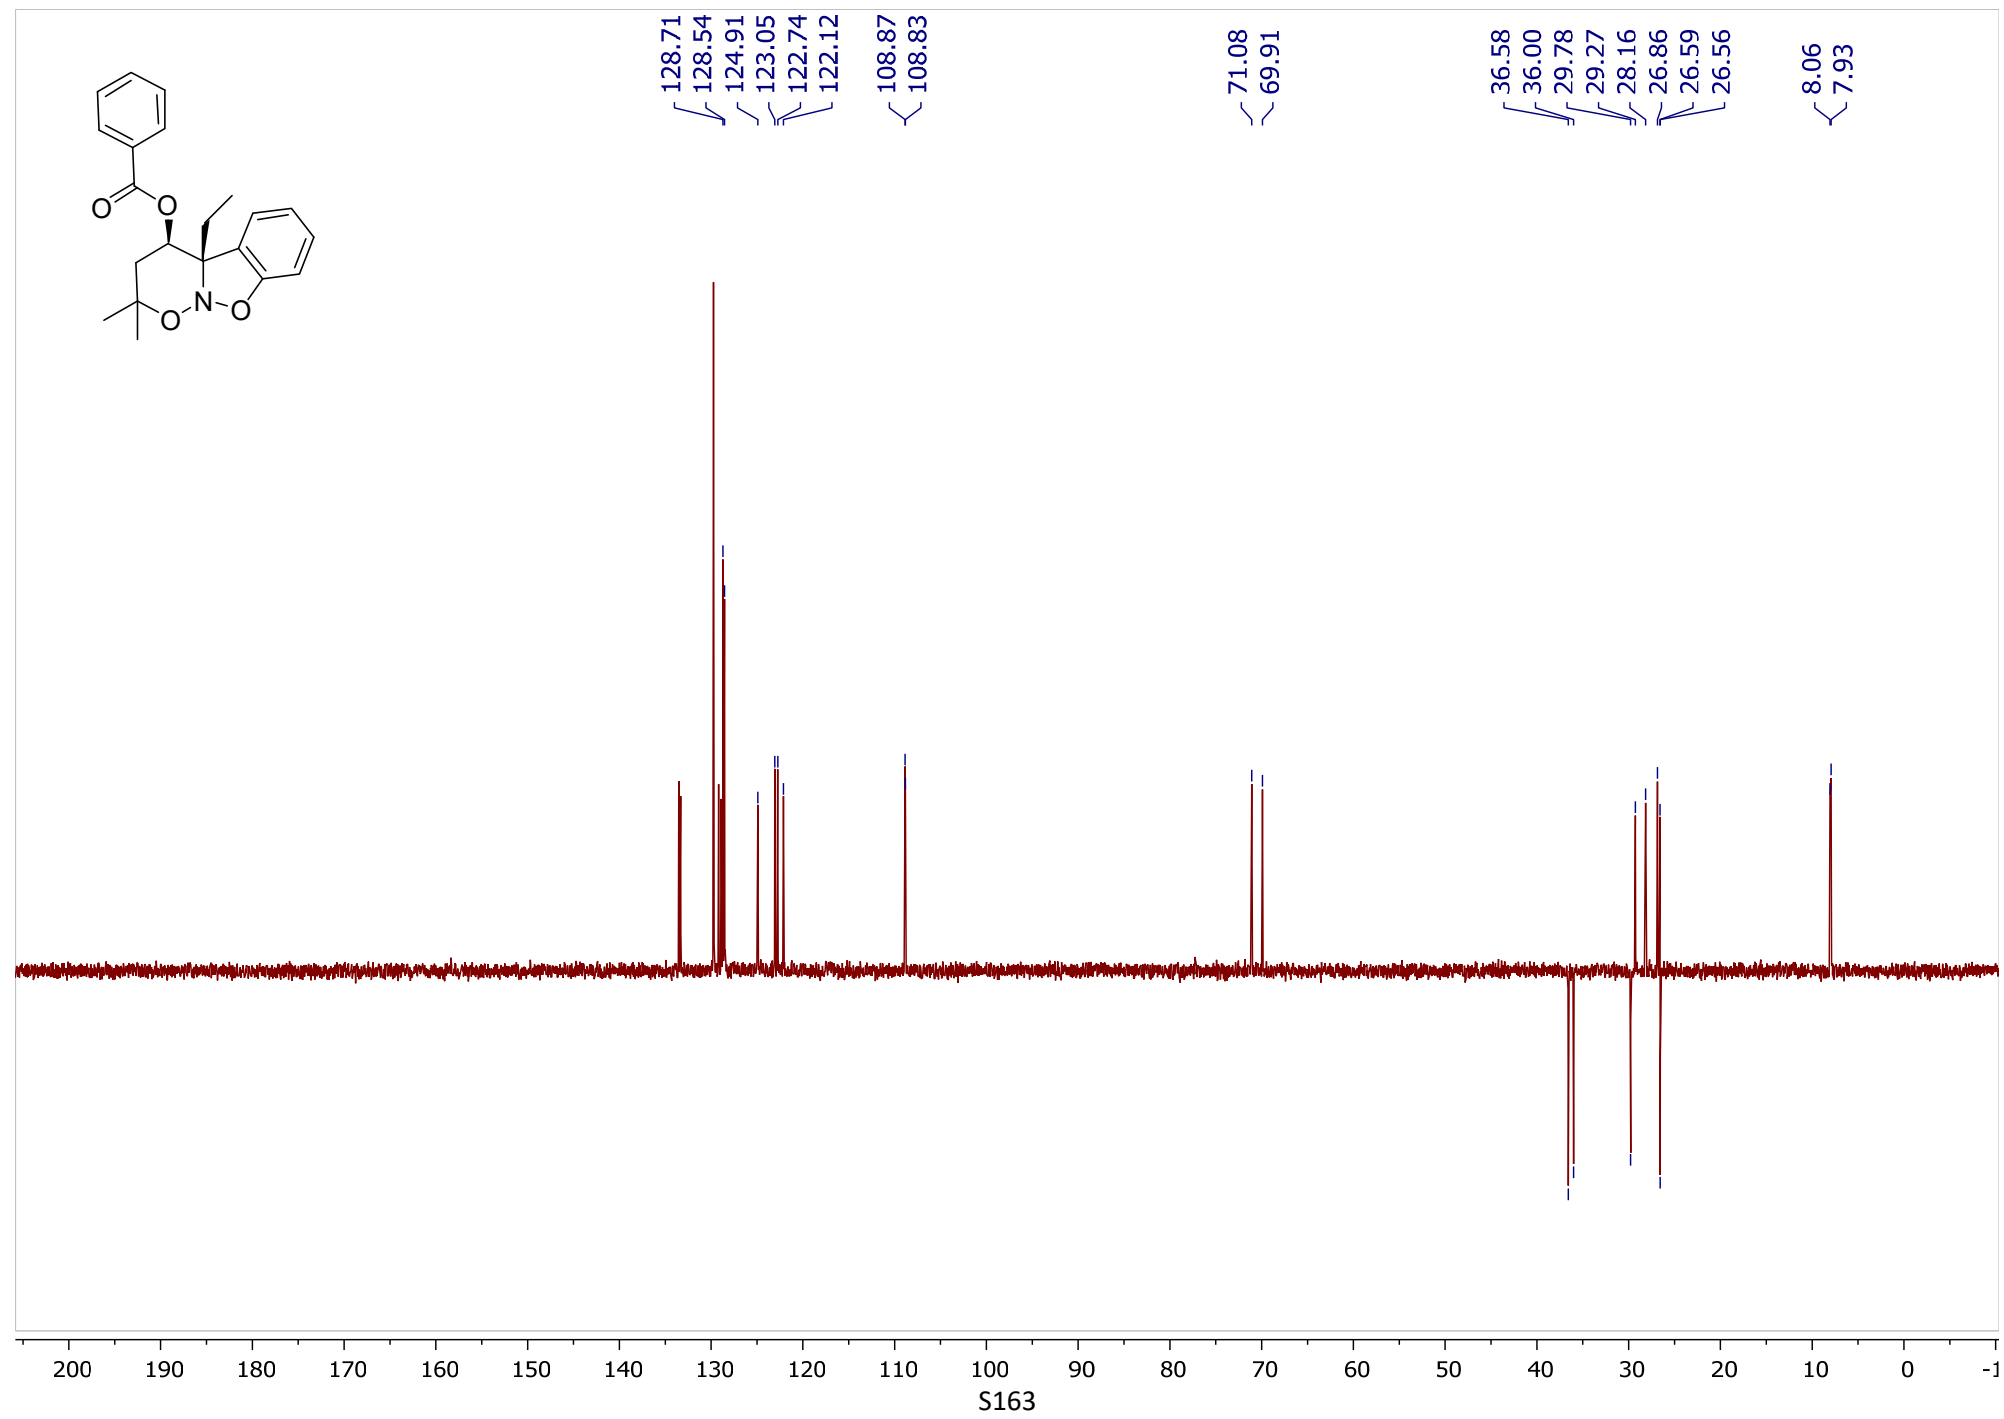

$^1\text{H}$ - $^1\text{H}$  COSY

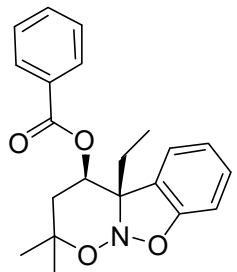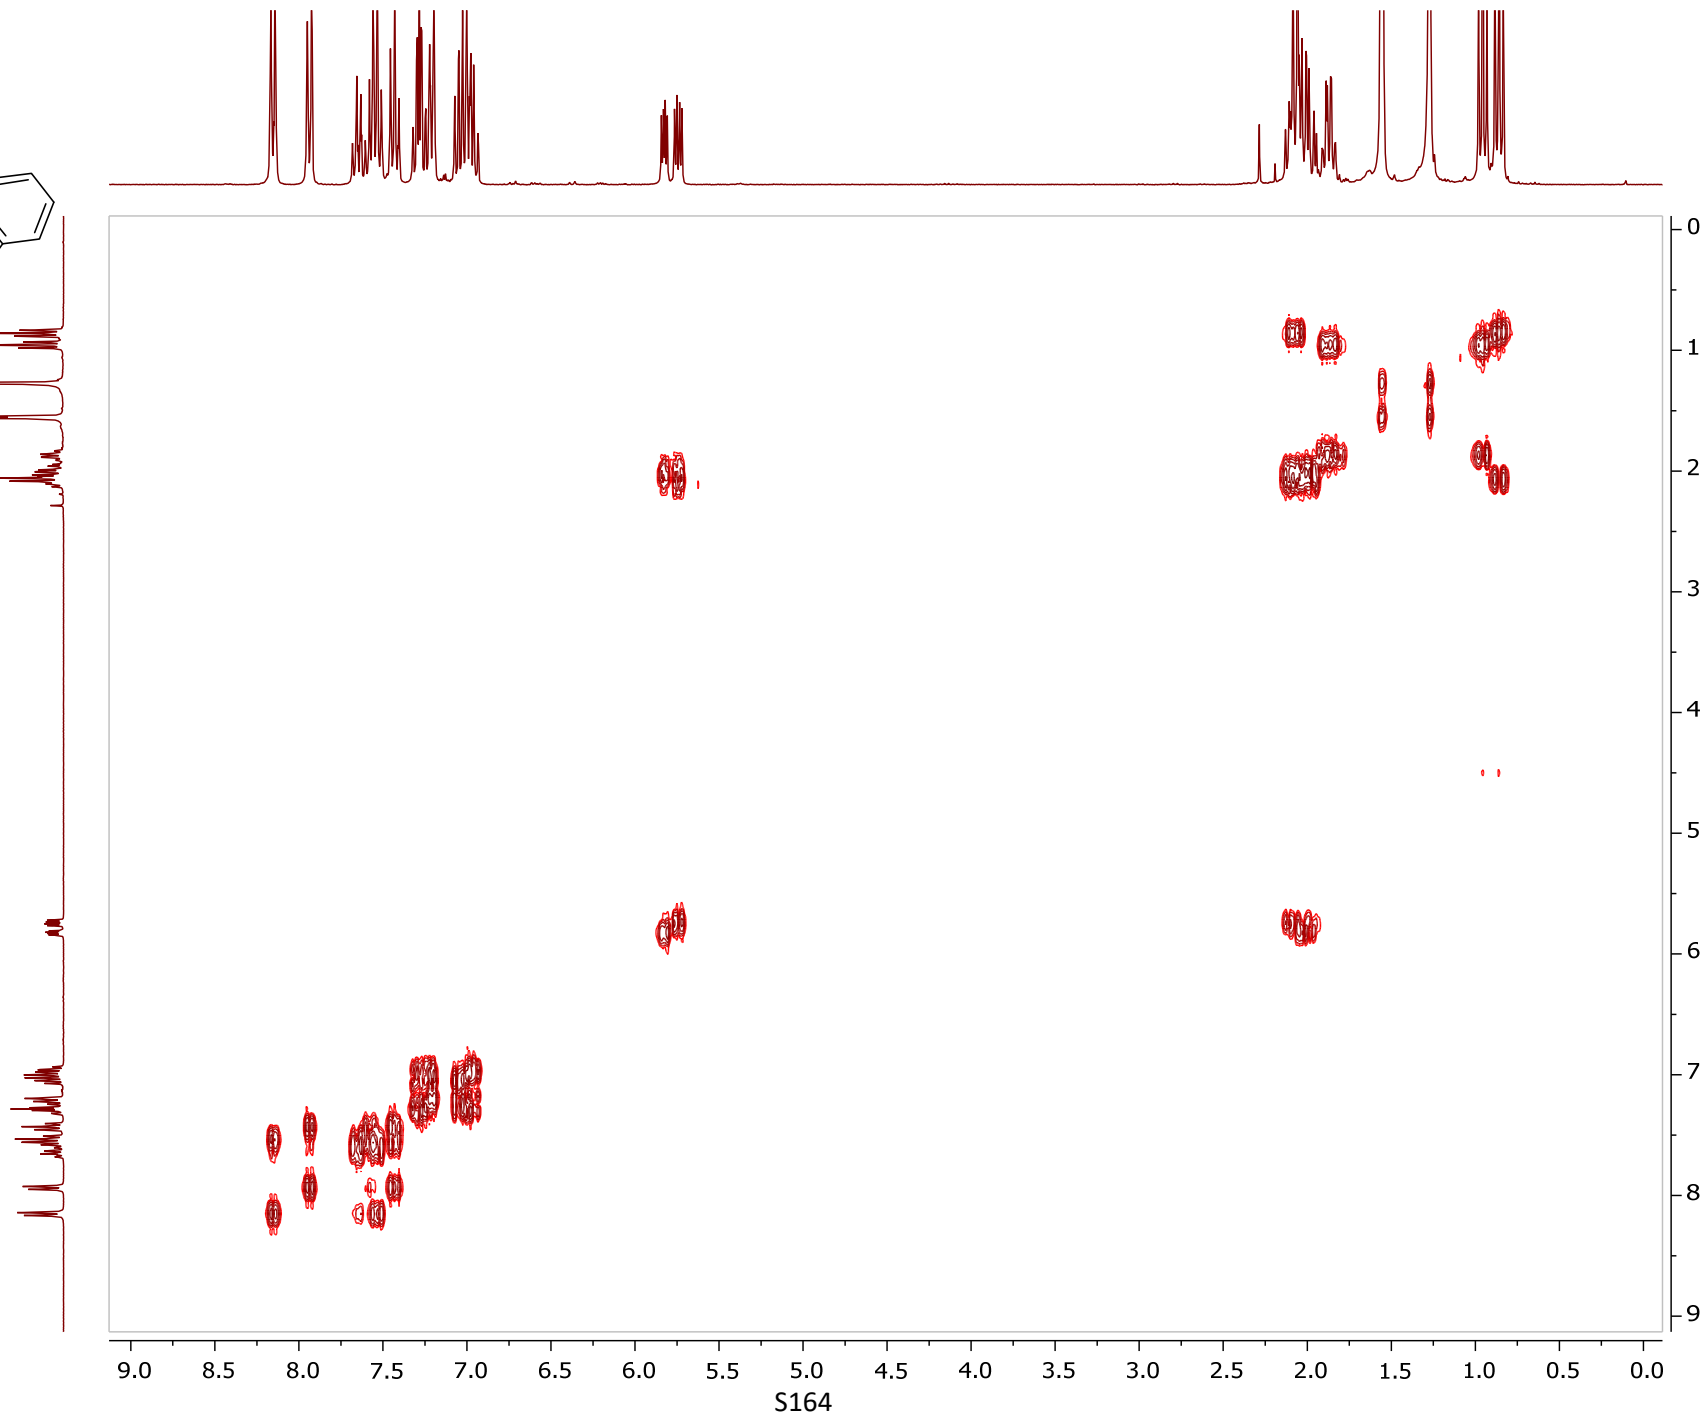

$^1\text{H}$ - $^{13}\text{C}$  HSQC

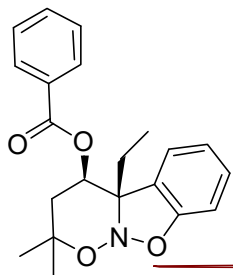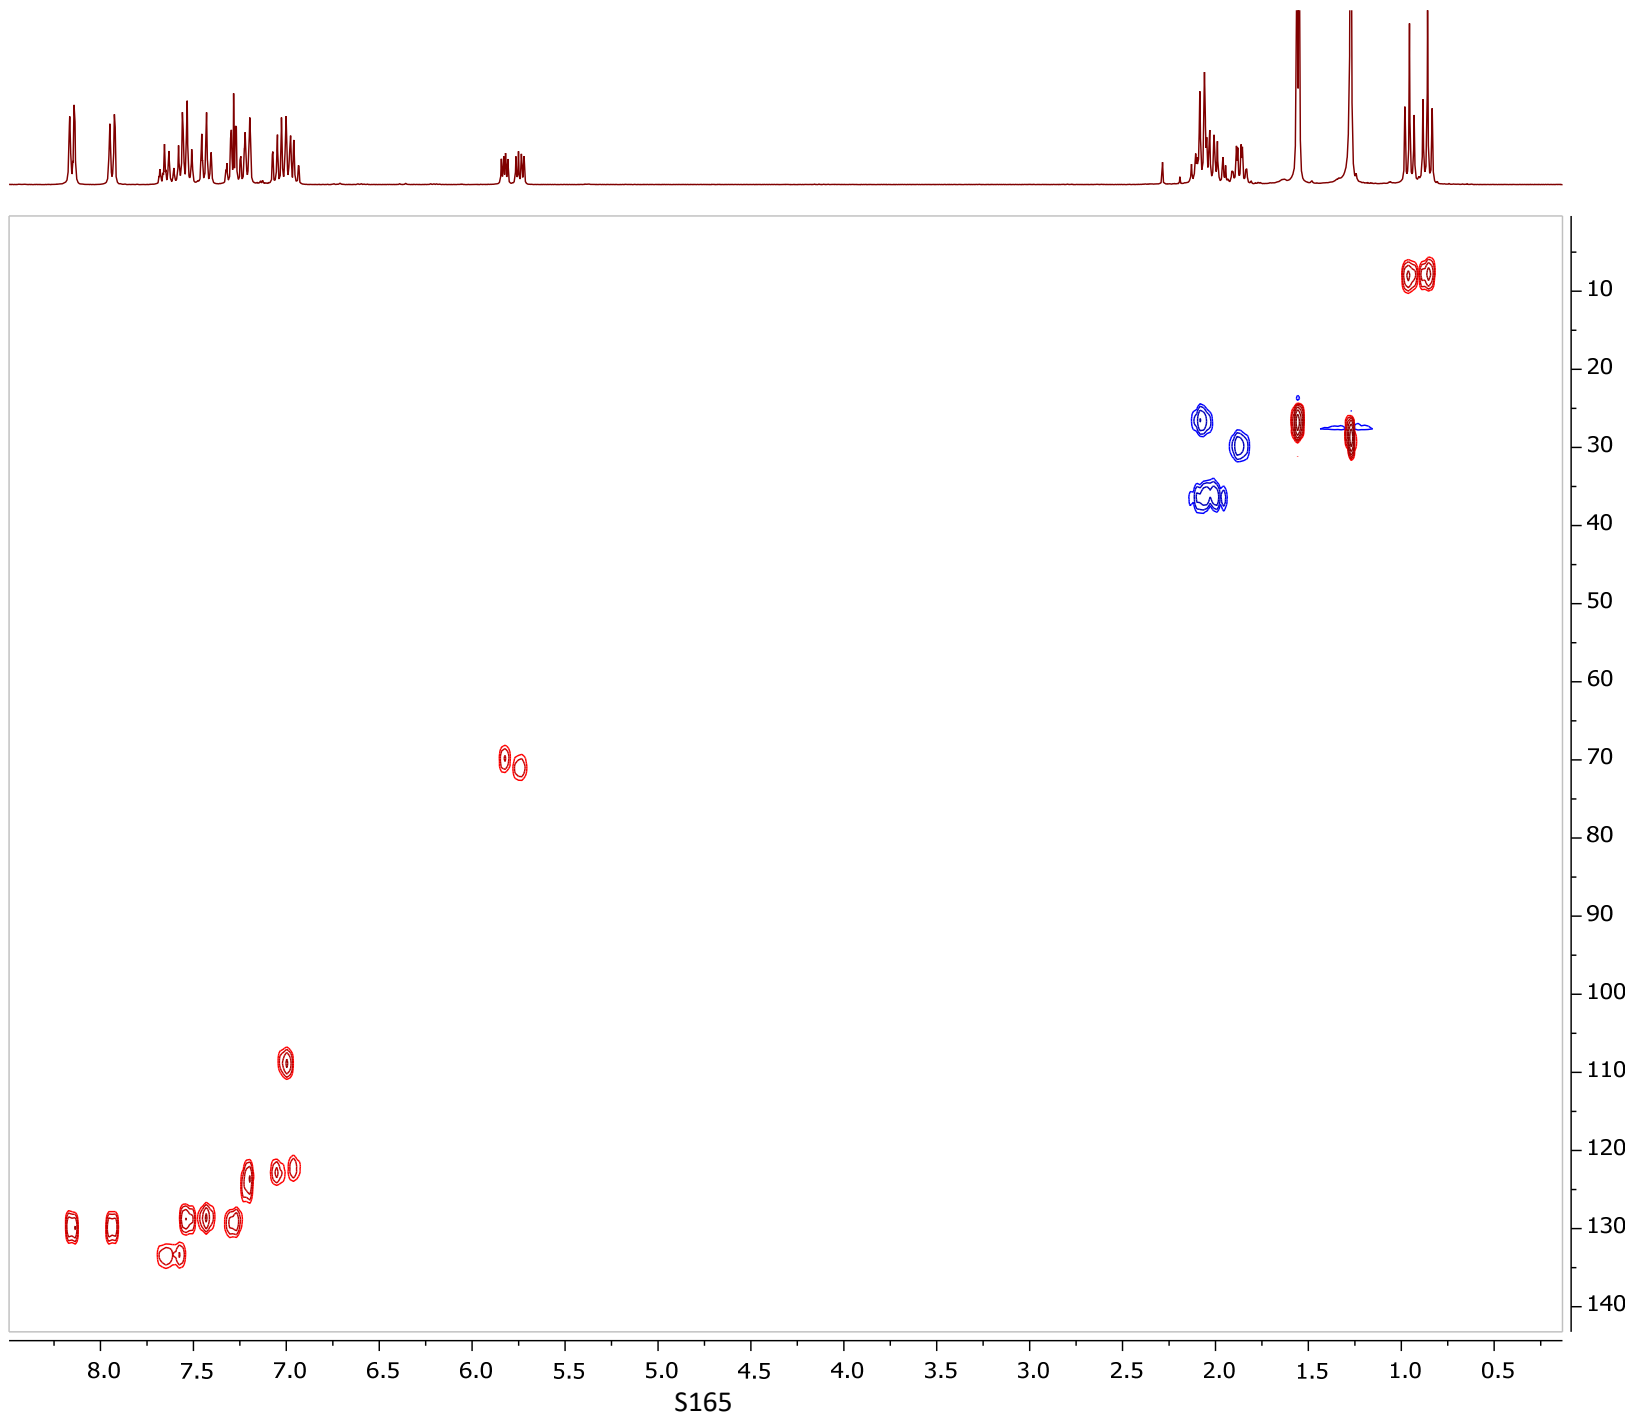

$^1\text{H}$ - $^{13}\text{C}$  HMBC

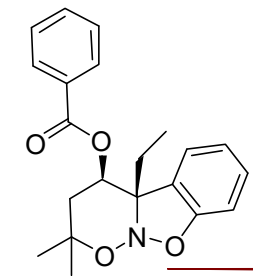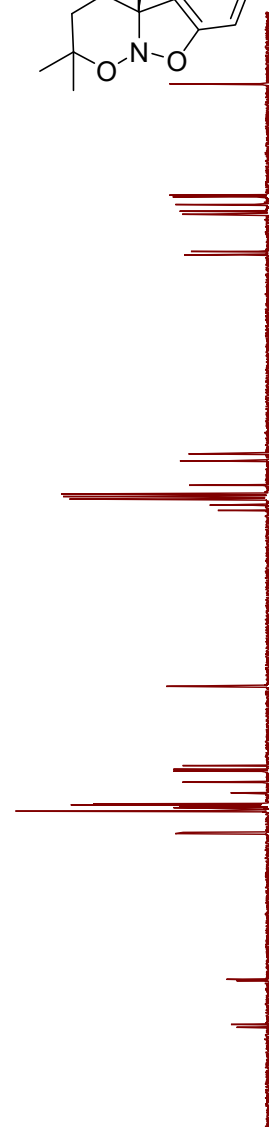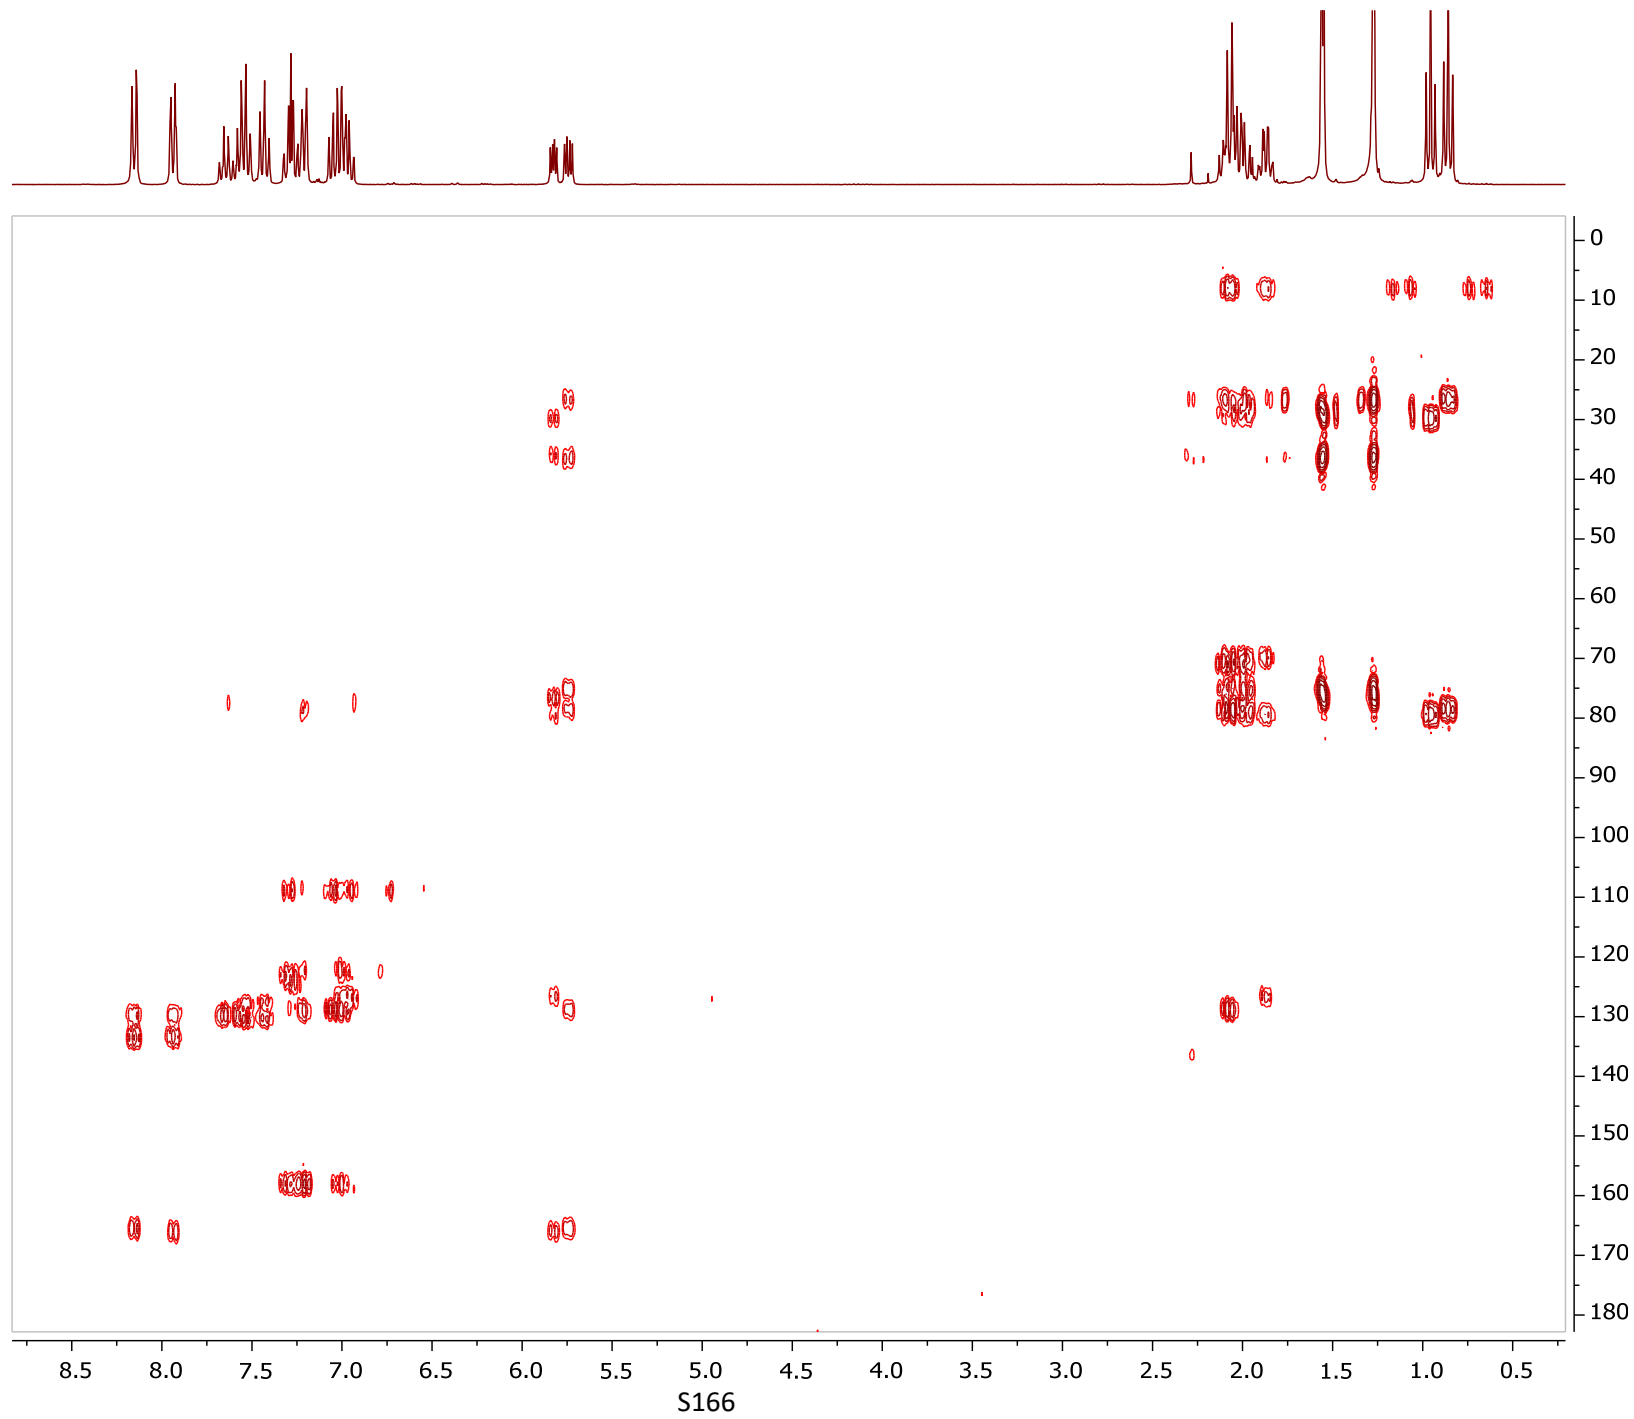

$^1\text{H}$ - $^1\text{H}$  NOESY

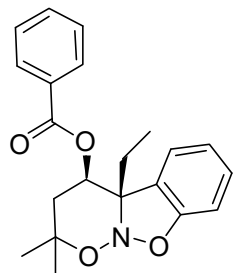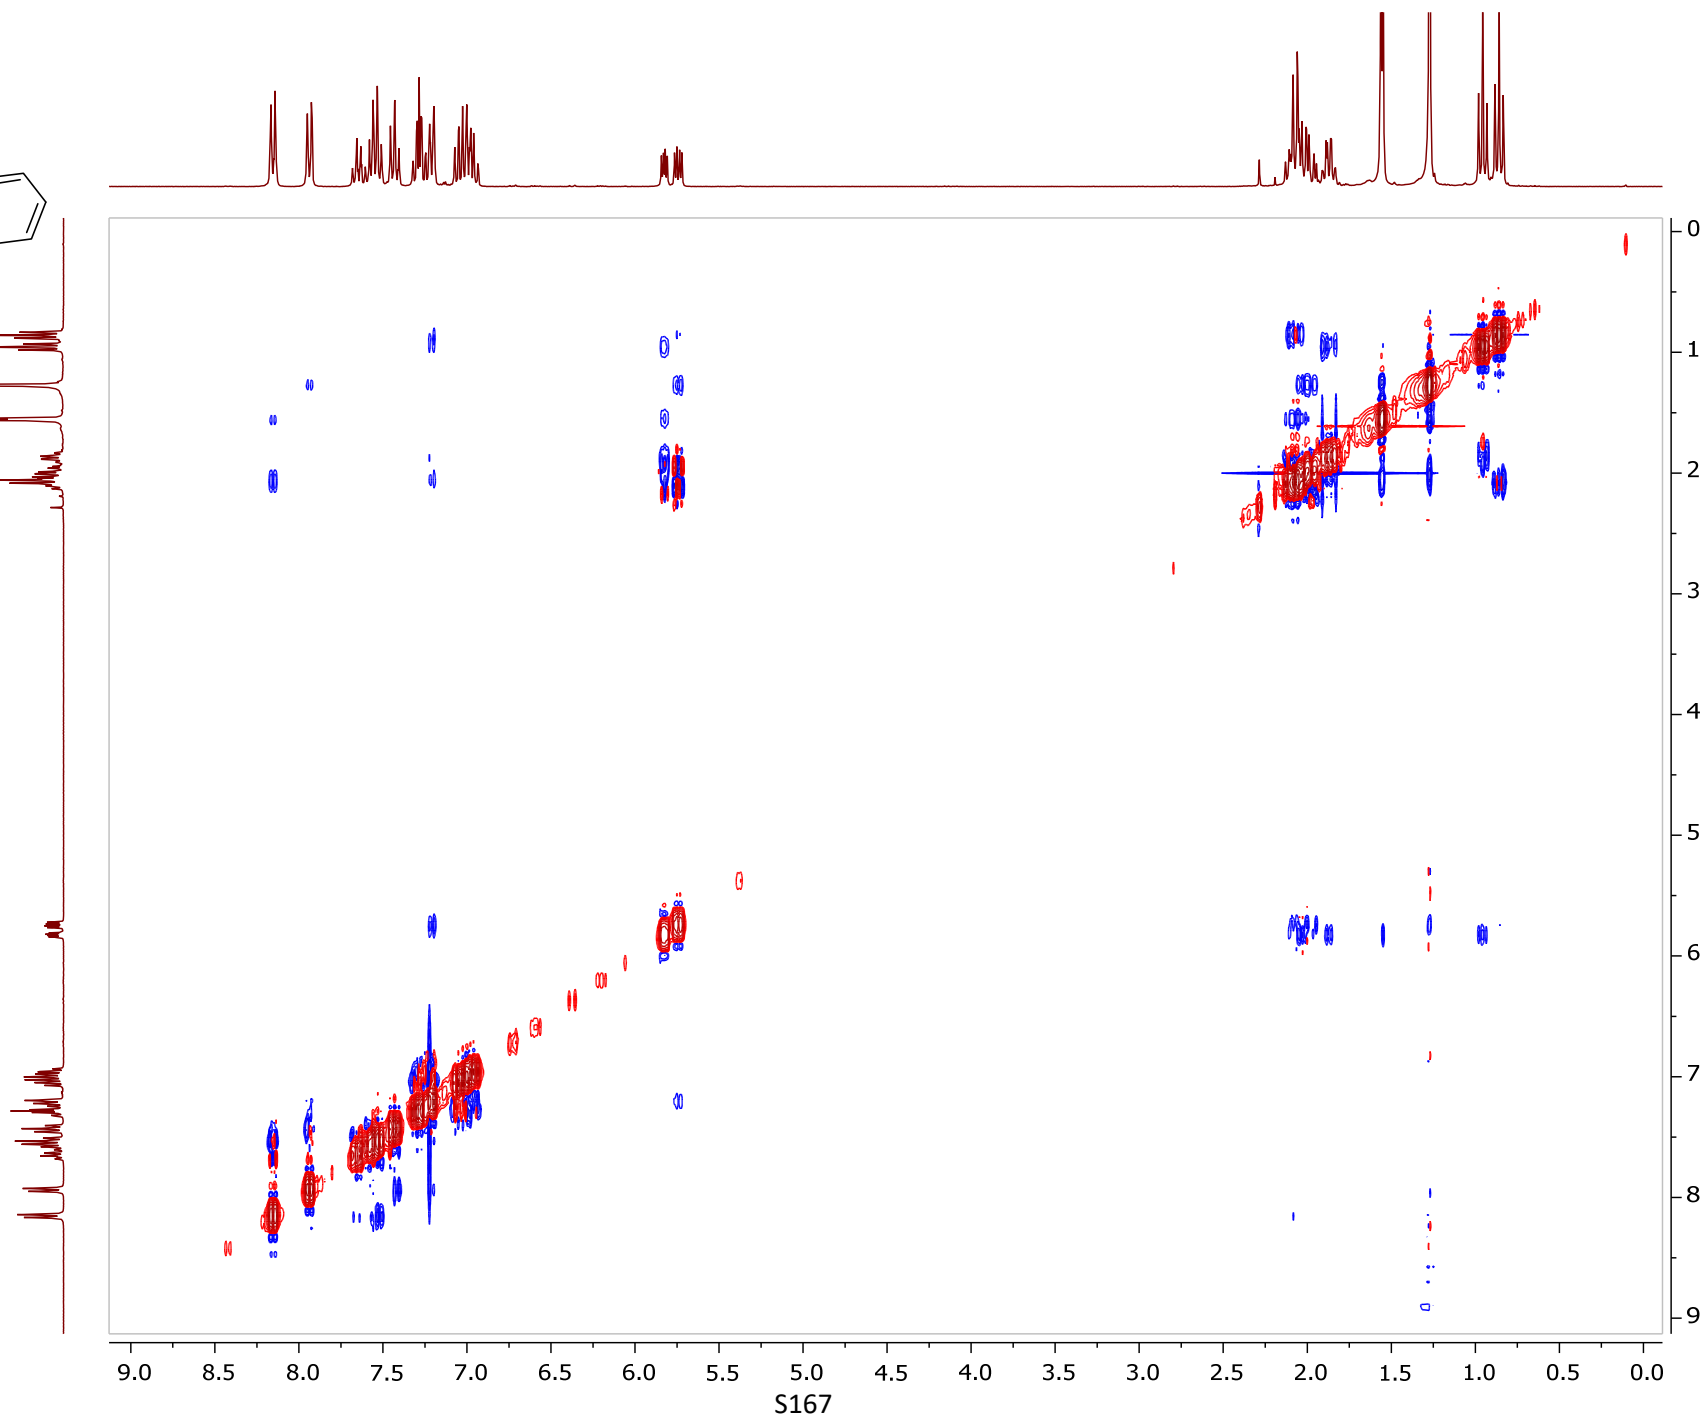

Methyl 3-((4S\*,4aS\*)-4-(4-methoxyphenyl)-2,2-dimethyl-3,4-dihydrobenzo[4,5]isoxazolo[2,3-b][1,2]oxazin-4a(2H)-yl)propanoate 5ha

<sup>1</sup>H NMR (300 MHz, CDCl<sub>3</sub>)

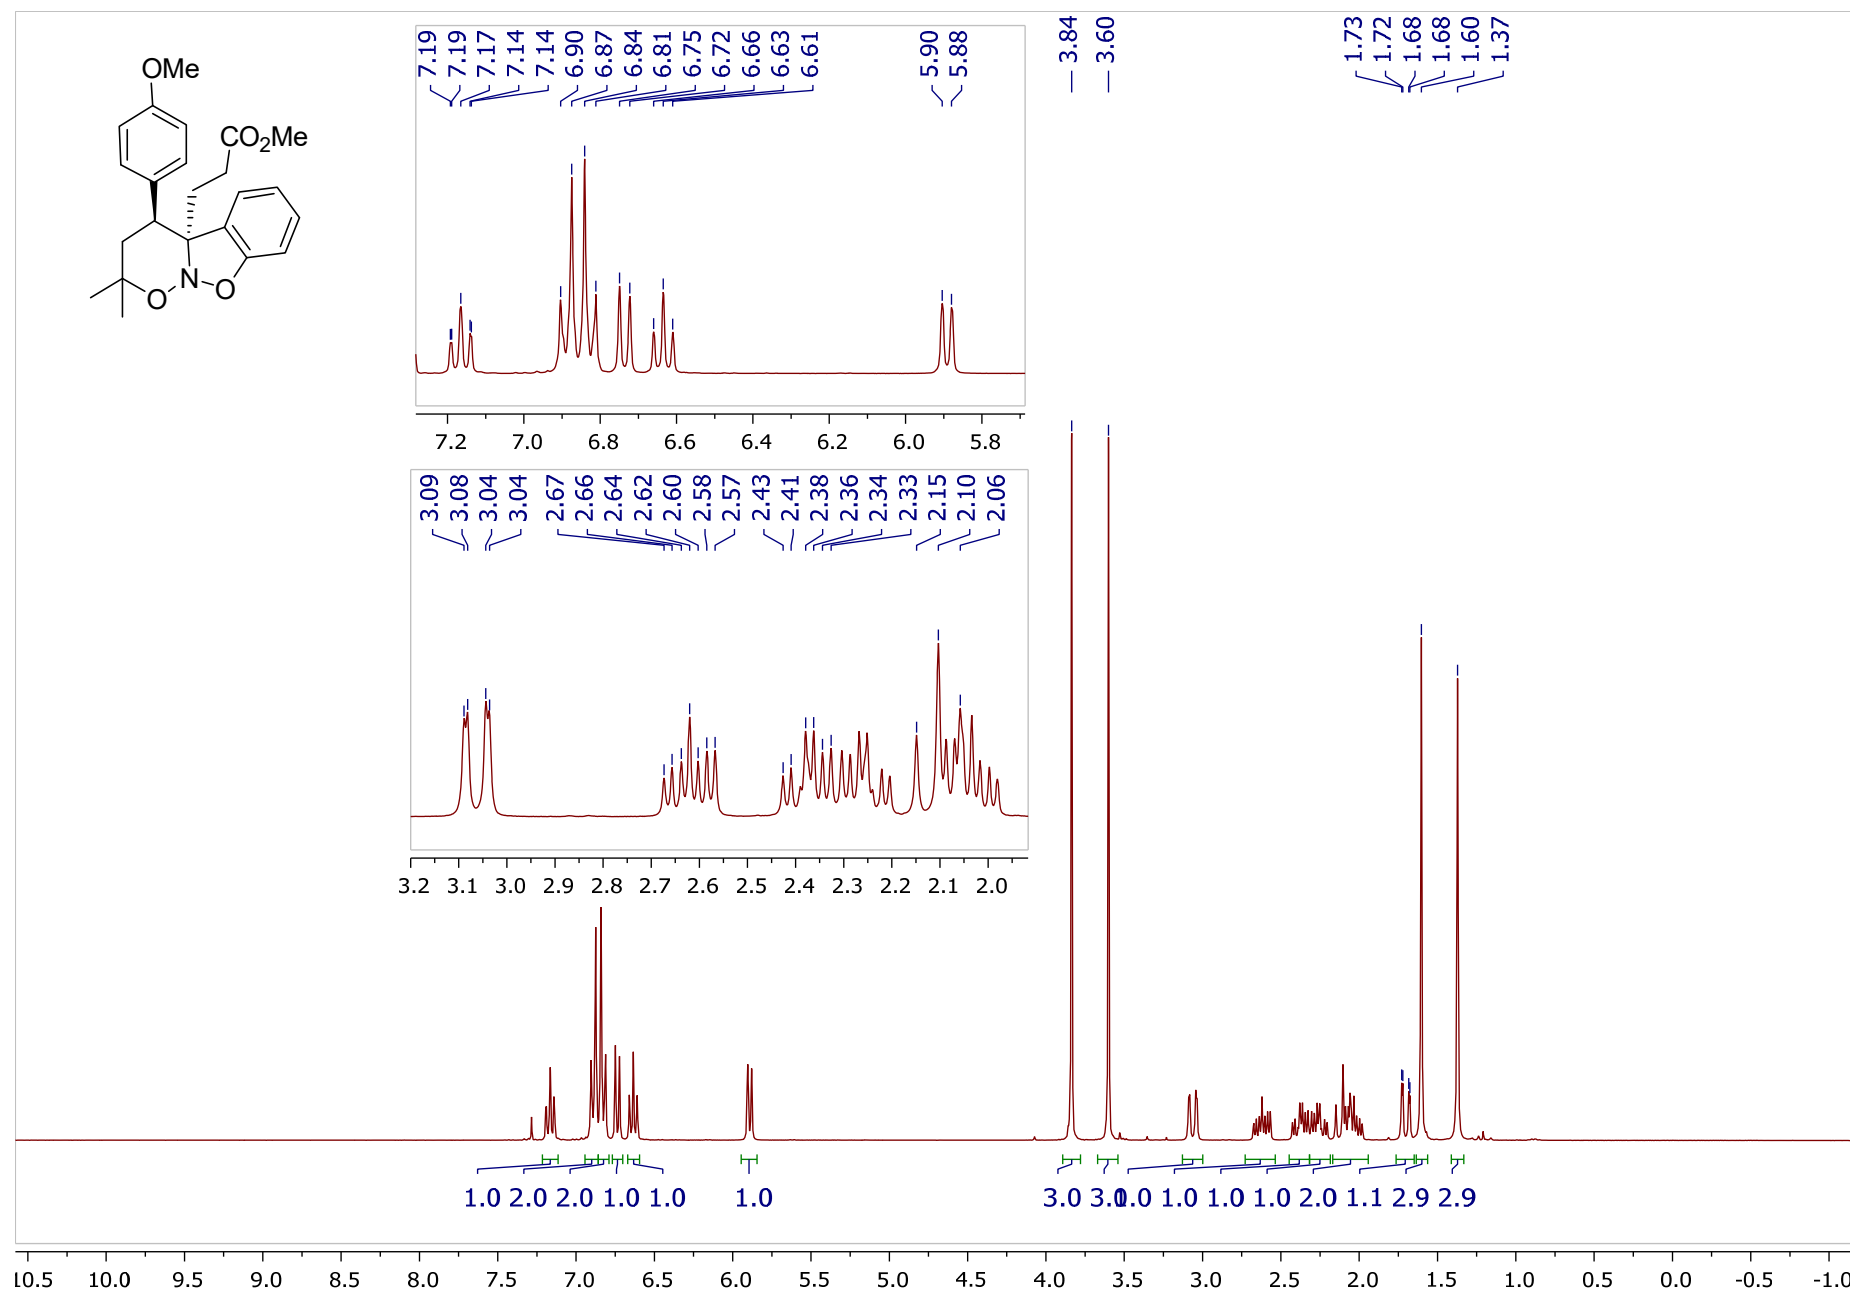



$^{13}\text{C}$  NMR (75 MHz,  $\text{CDCl}_3$ )

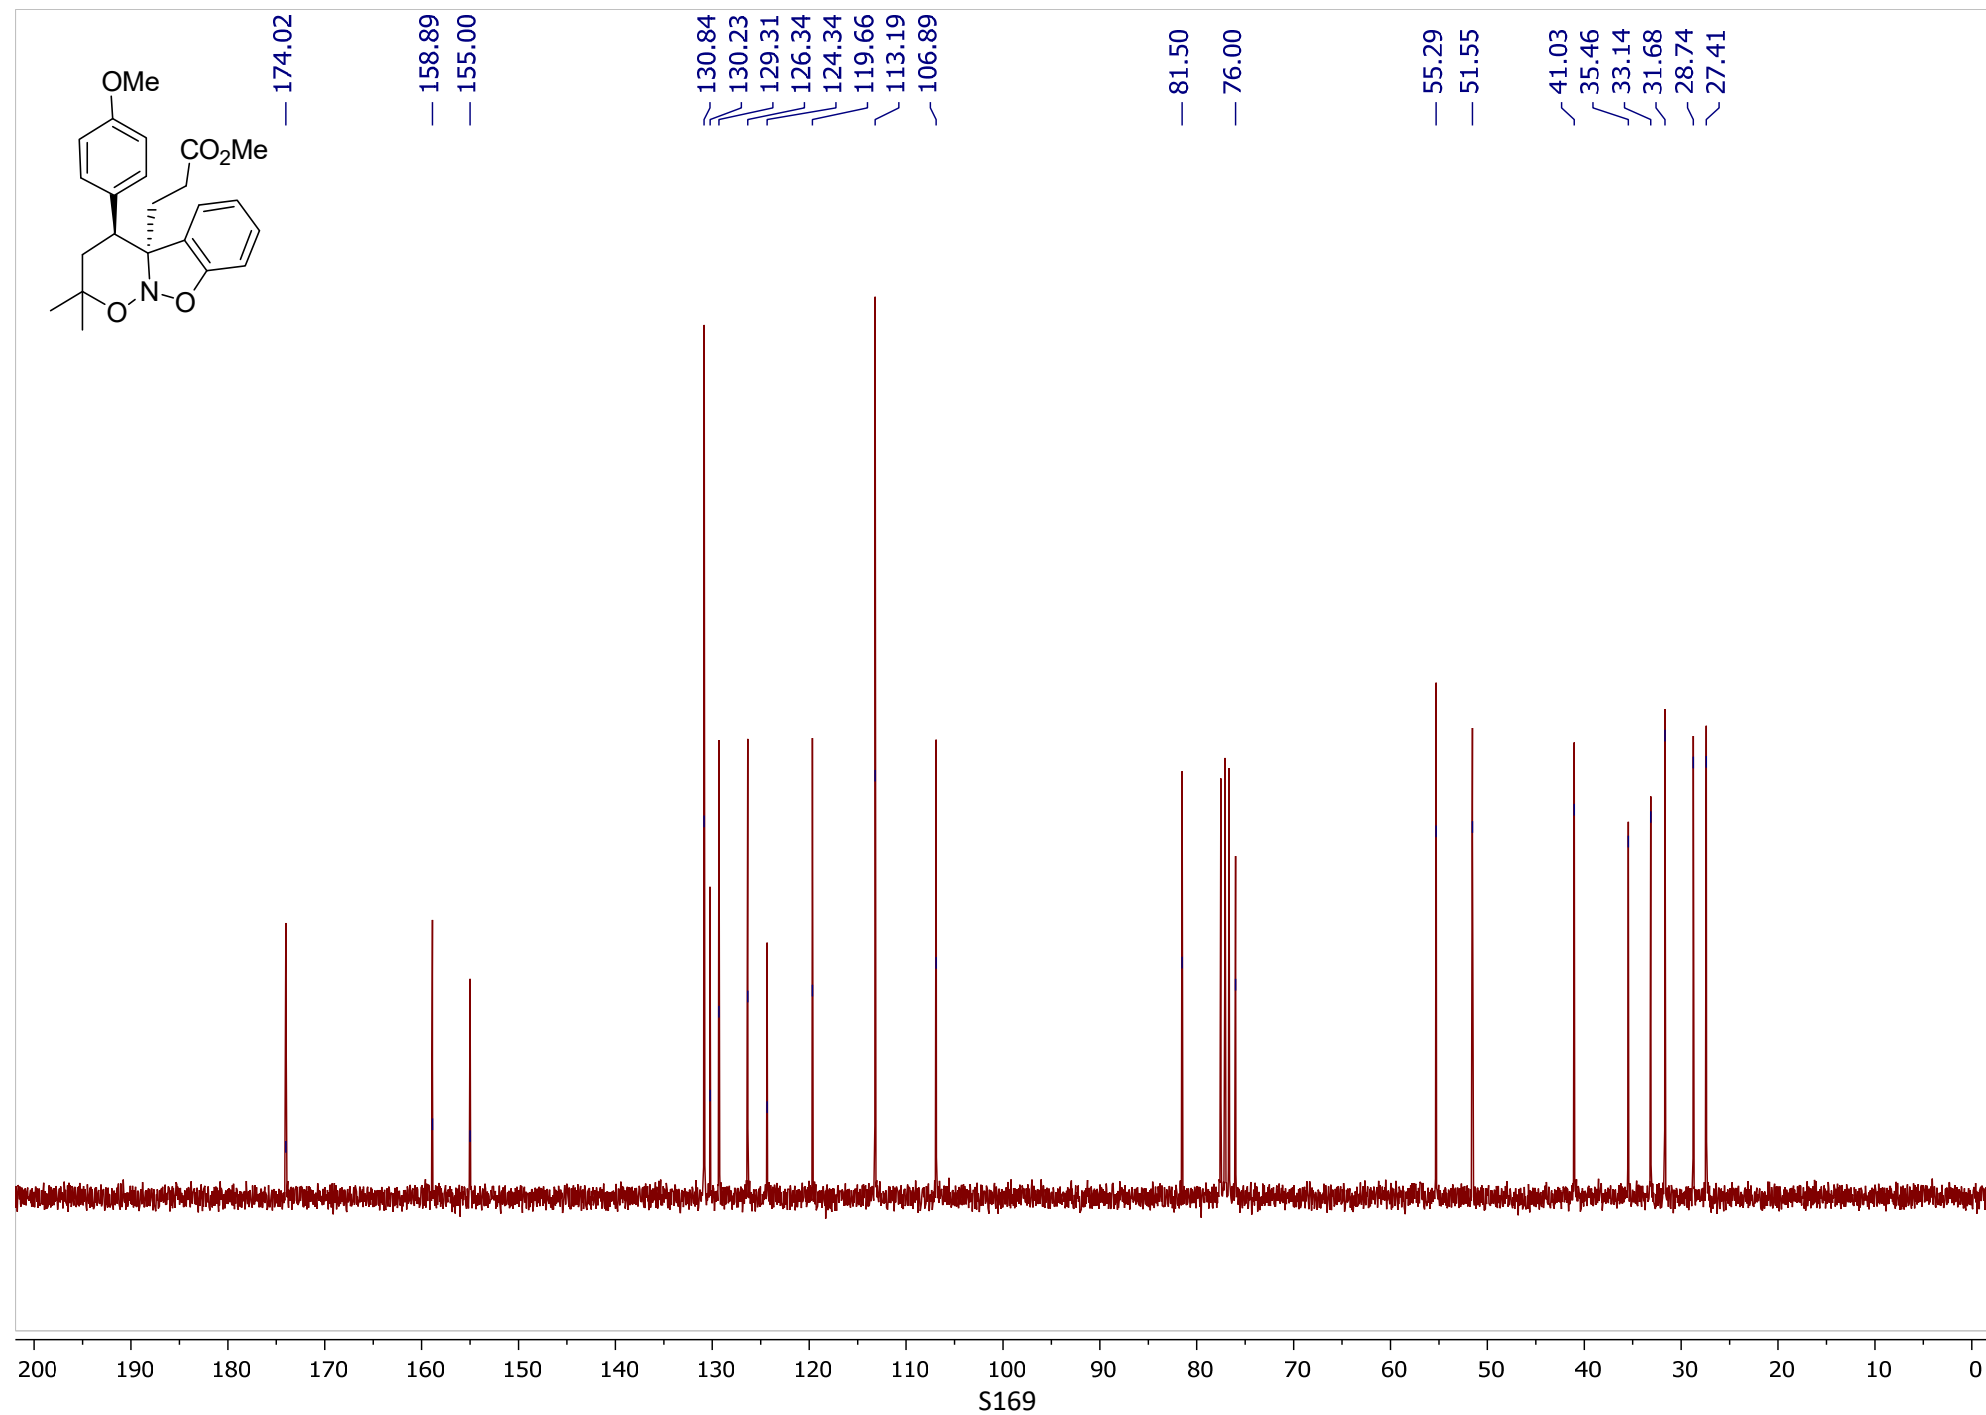

<sup>13</sup>C DEPT 135 (75 MHz, CDCl<sub>3</sub>)

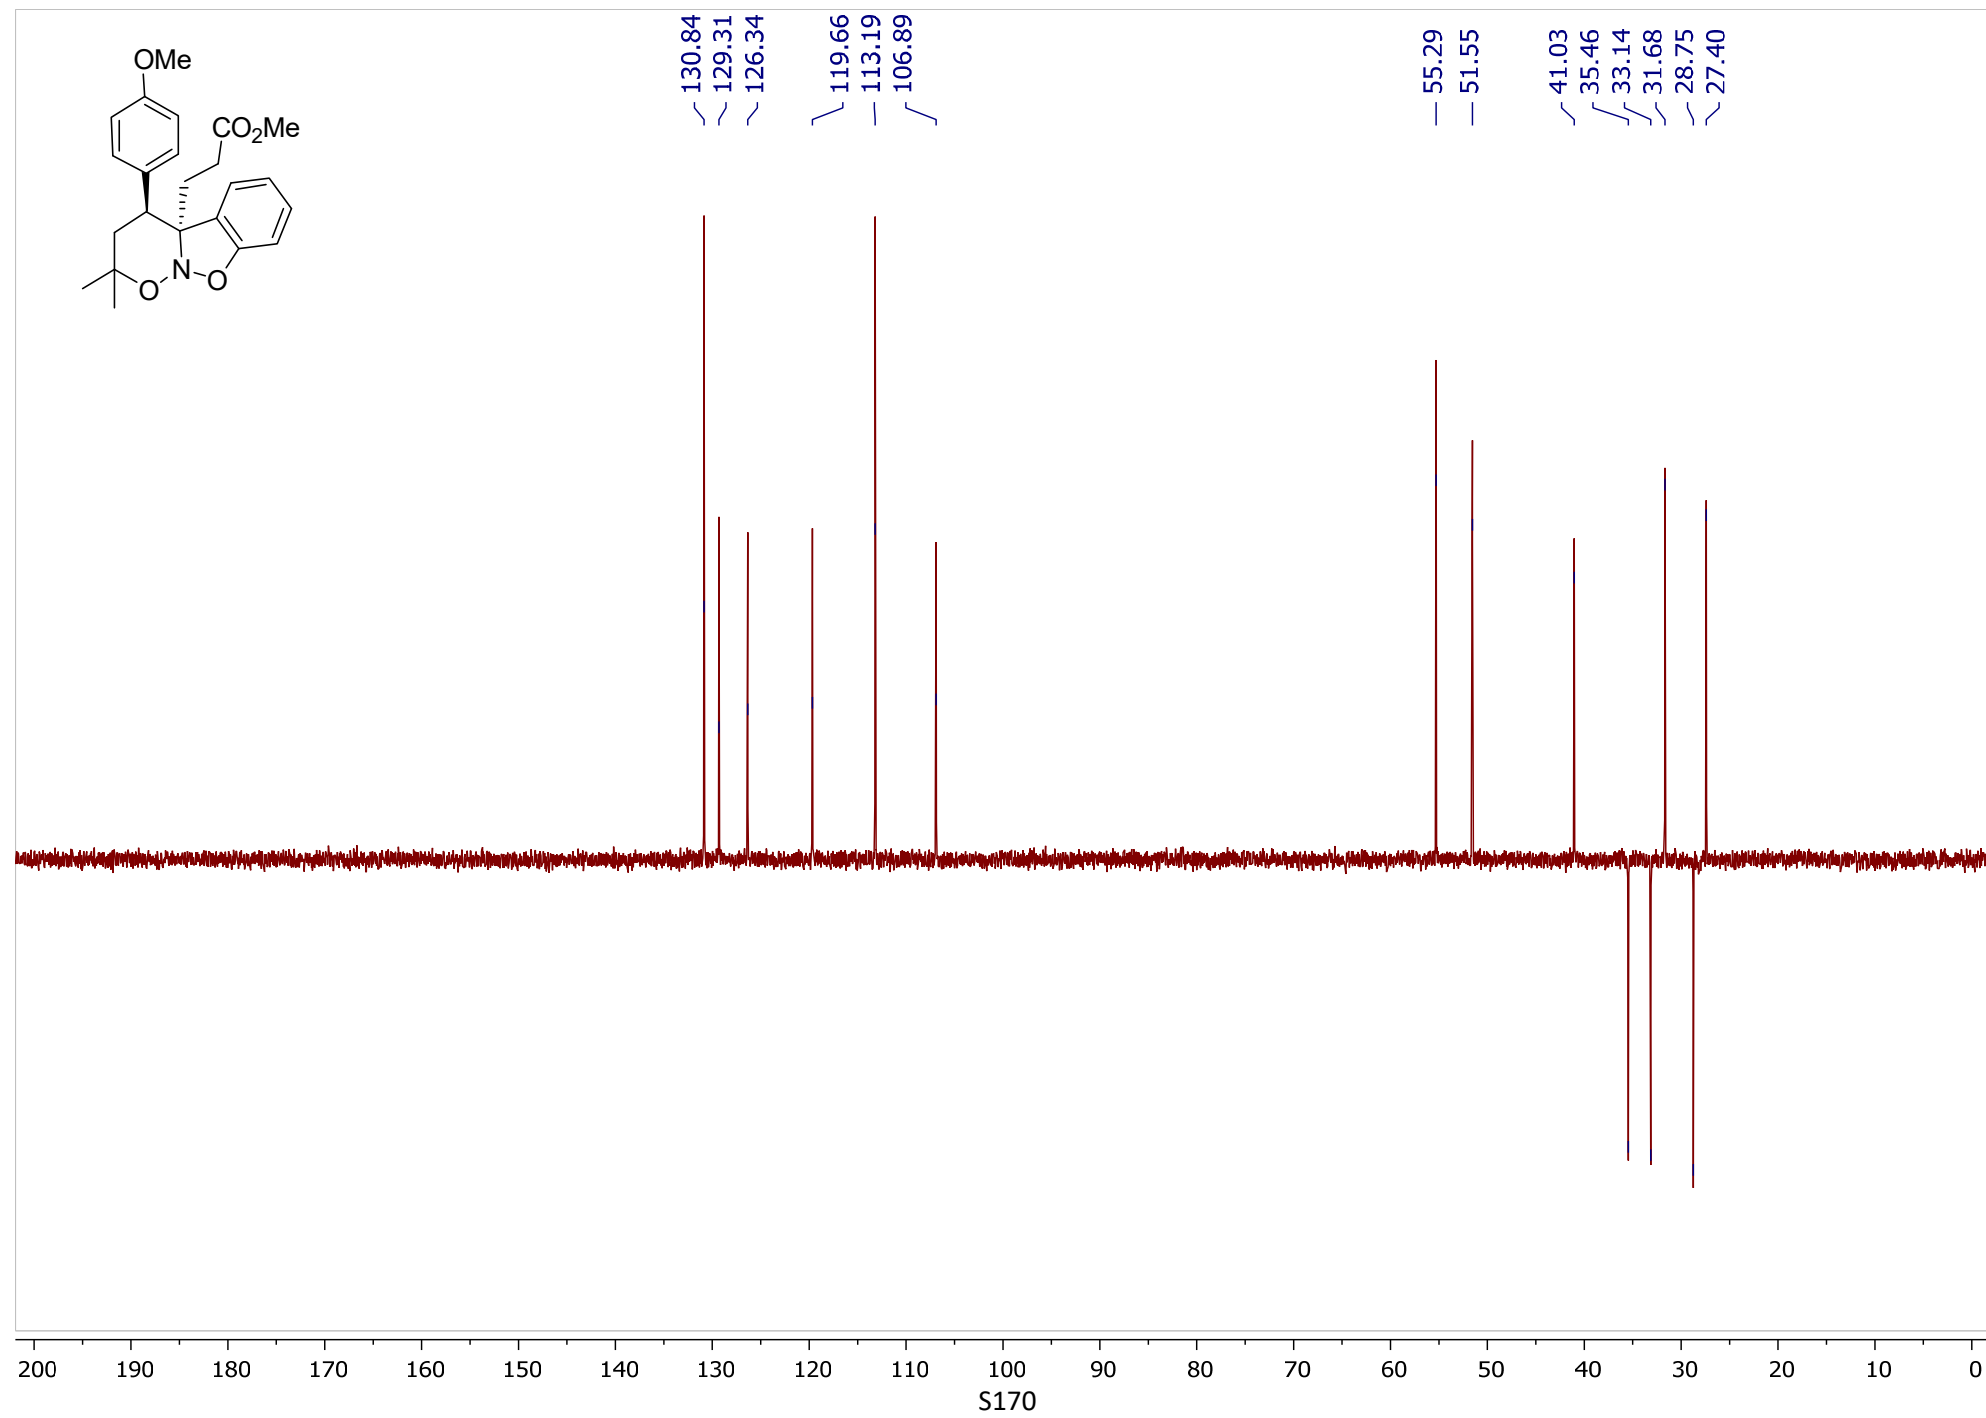

$^1\text{H}$ - $^1\text{H}$  COSY

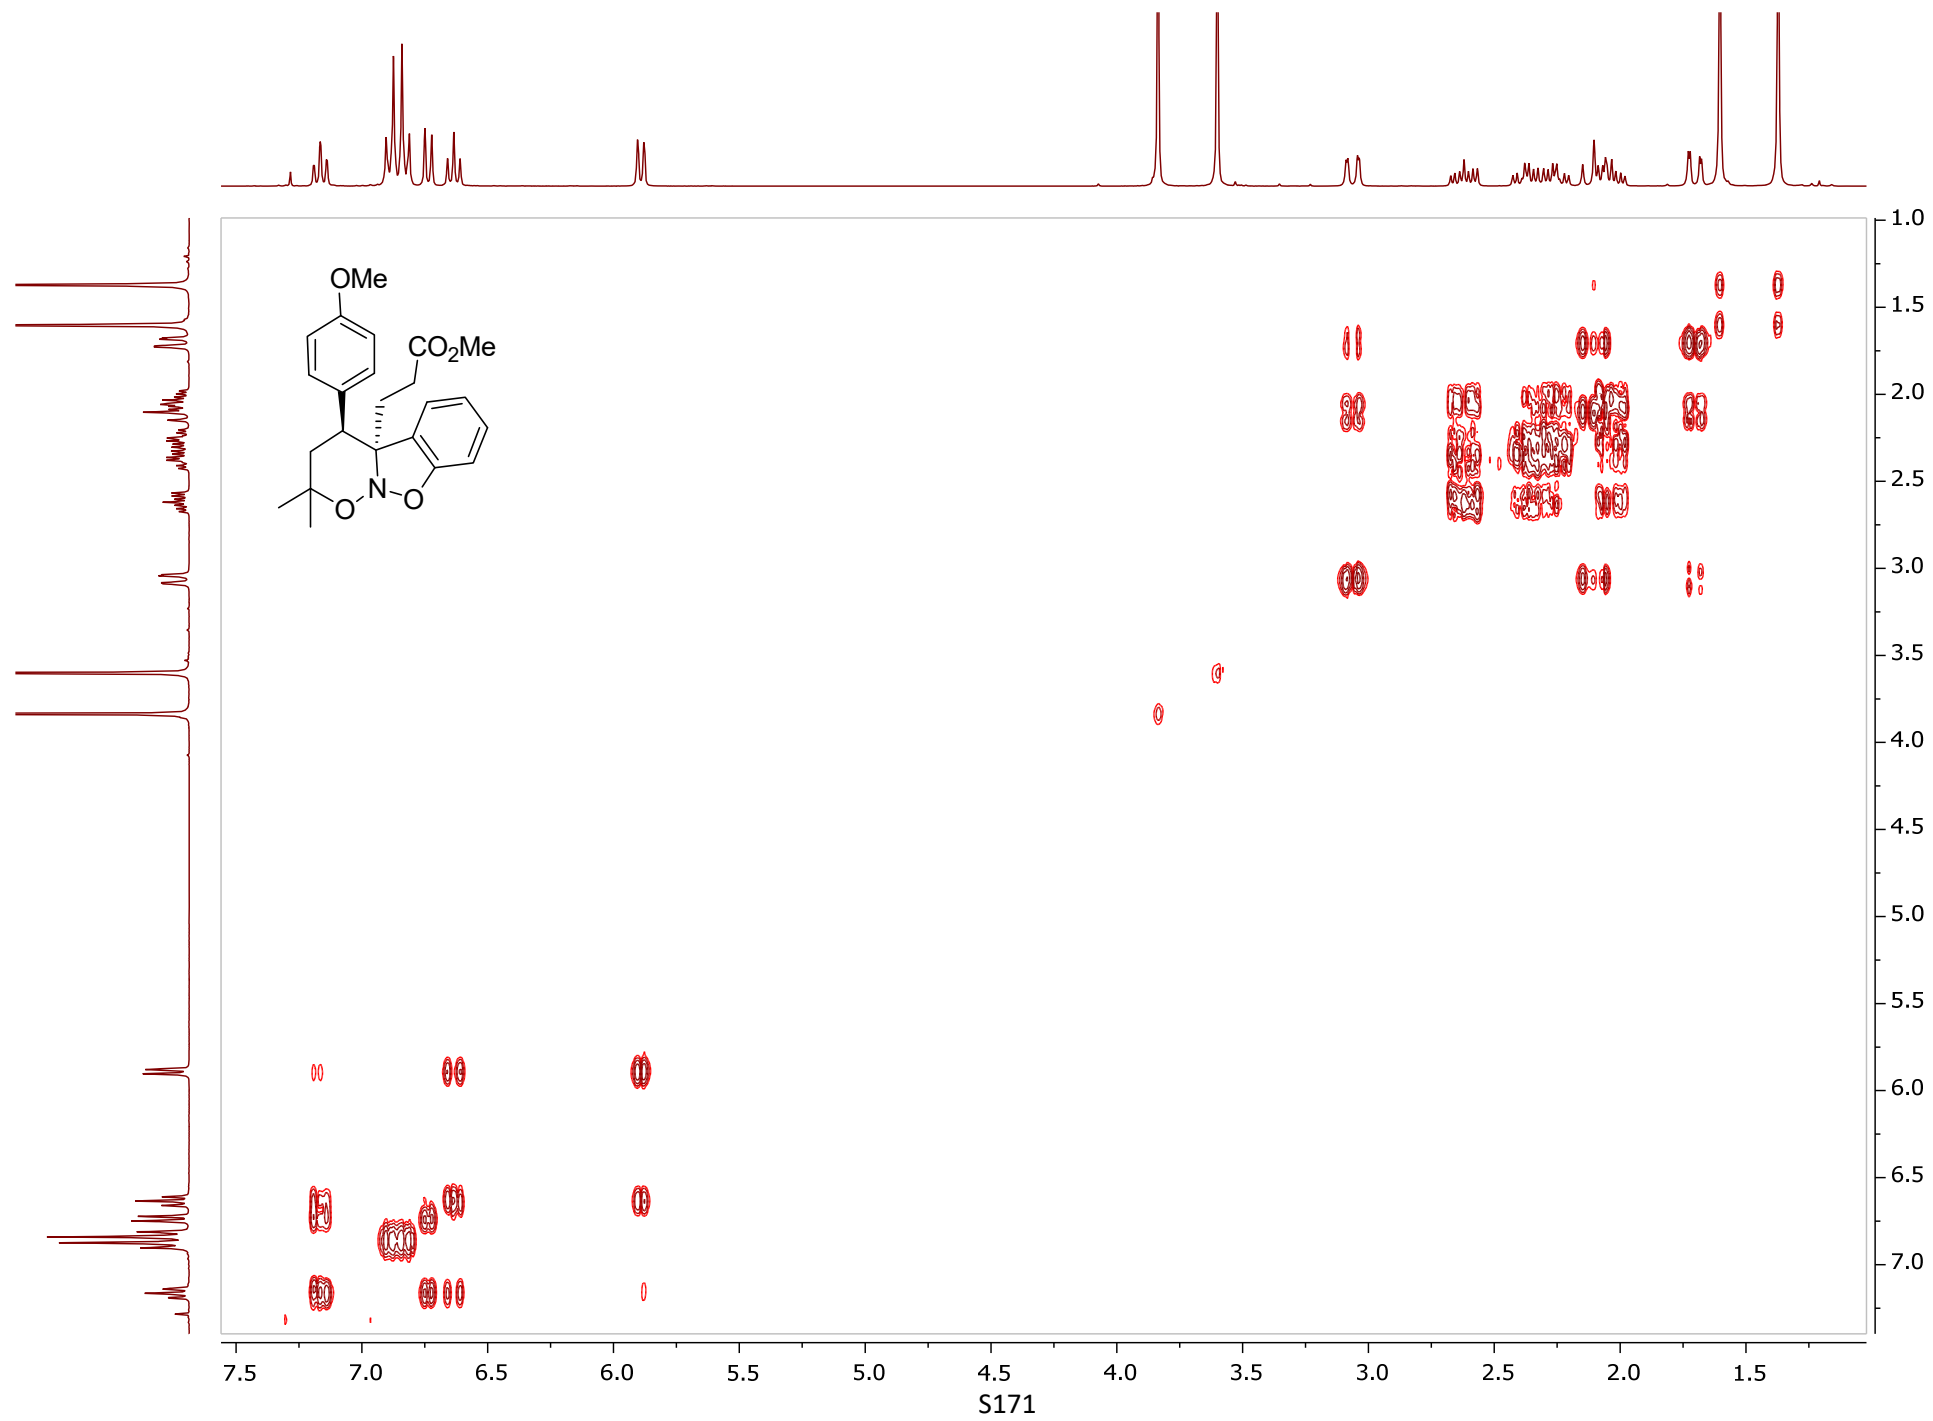

$^1\text{H}$ - $^{13}\text{C}$  HSQC

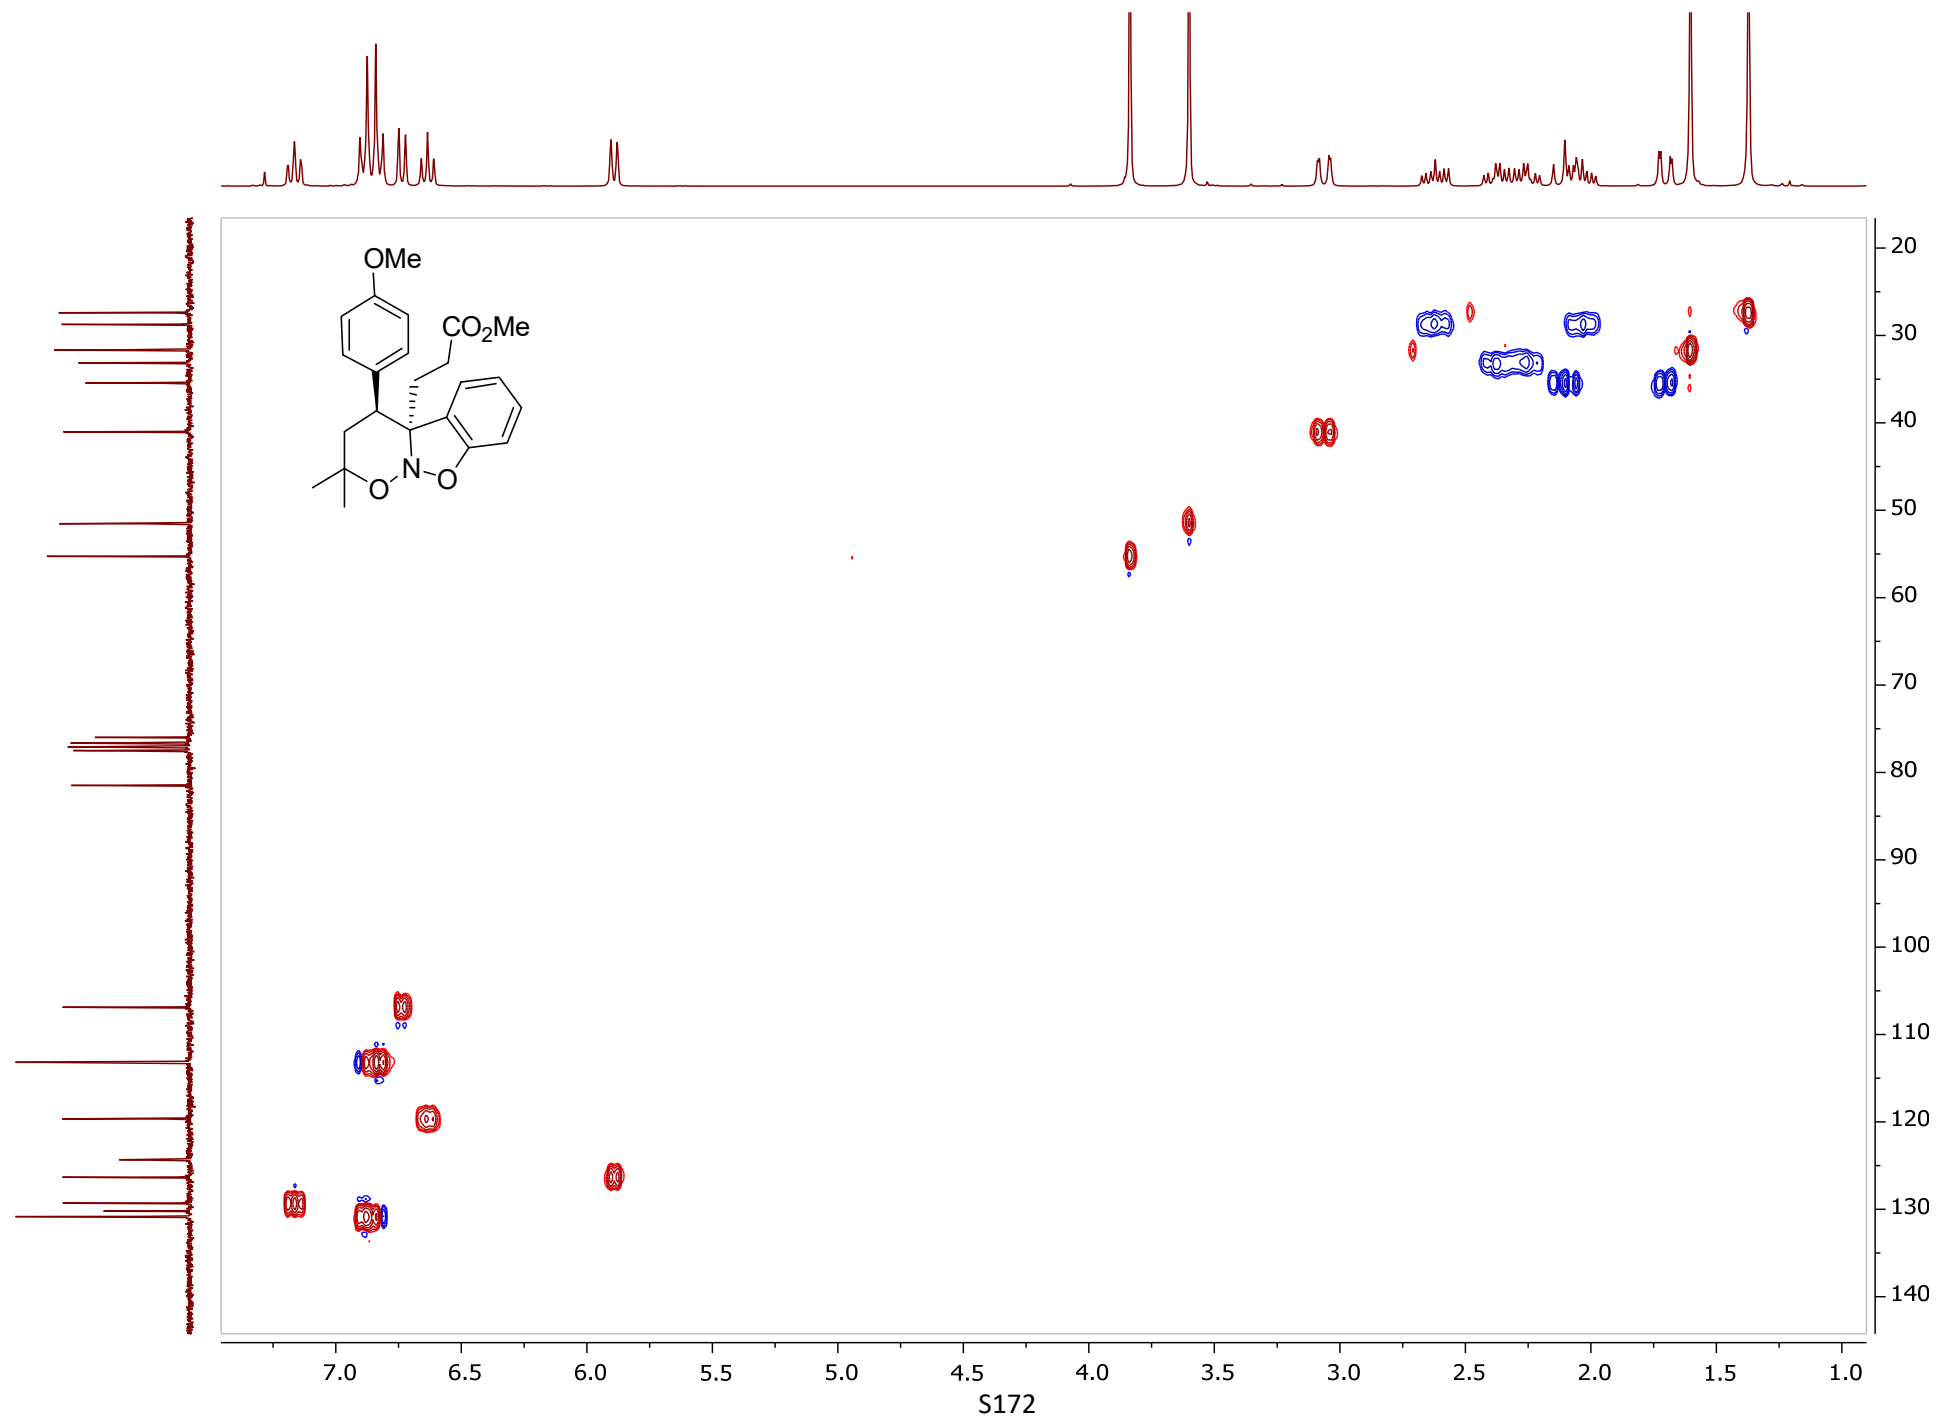

$^1\text{H}$ - $^{13}\text{C}$  HMBC

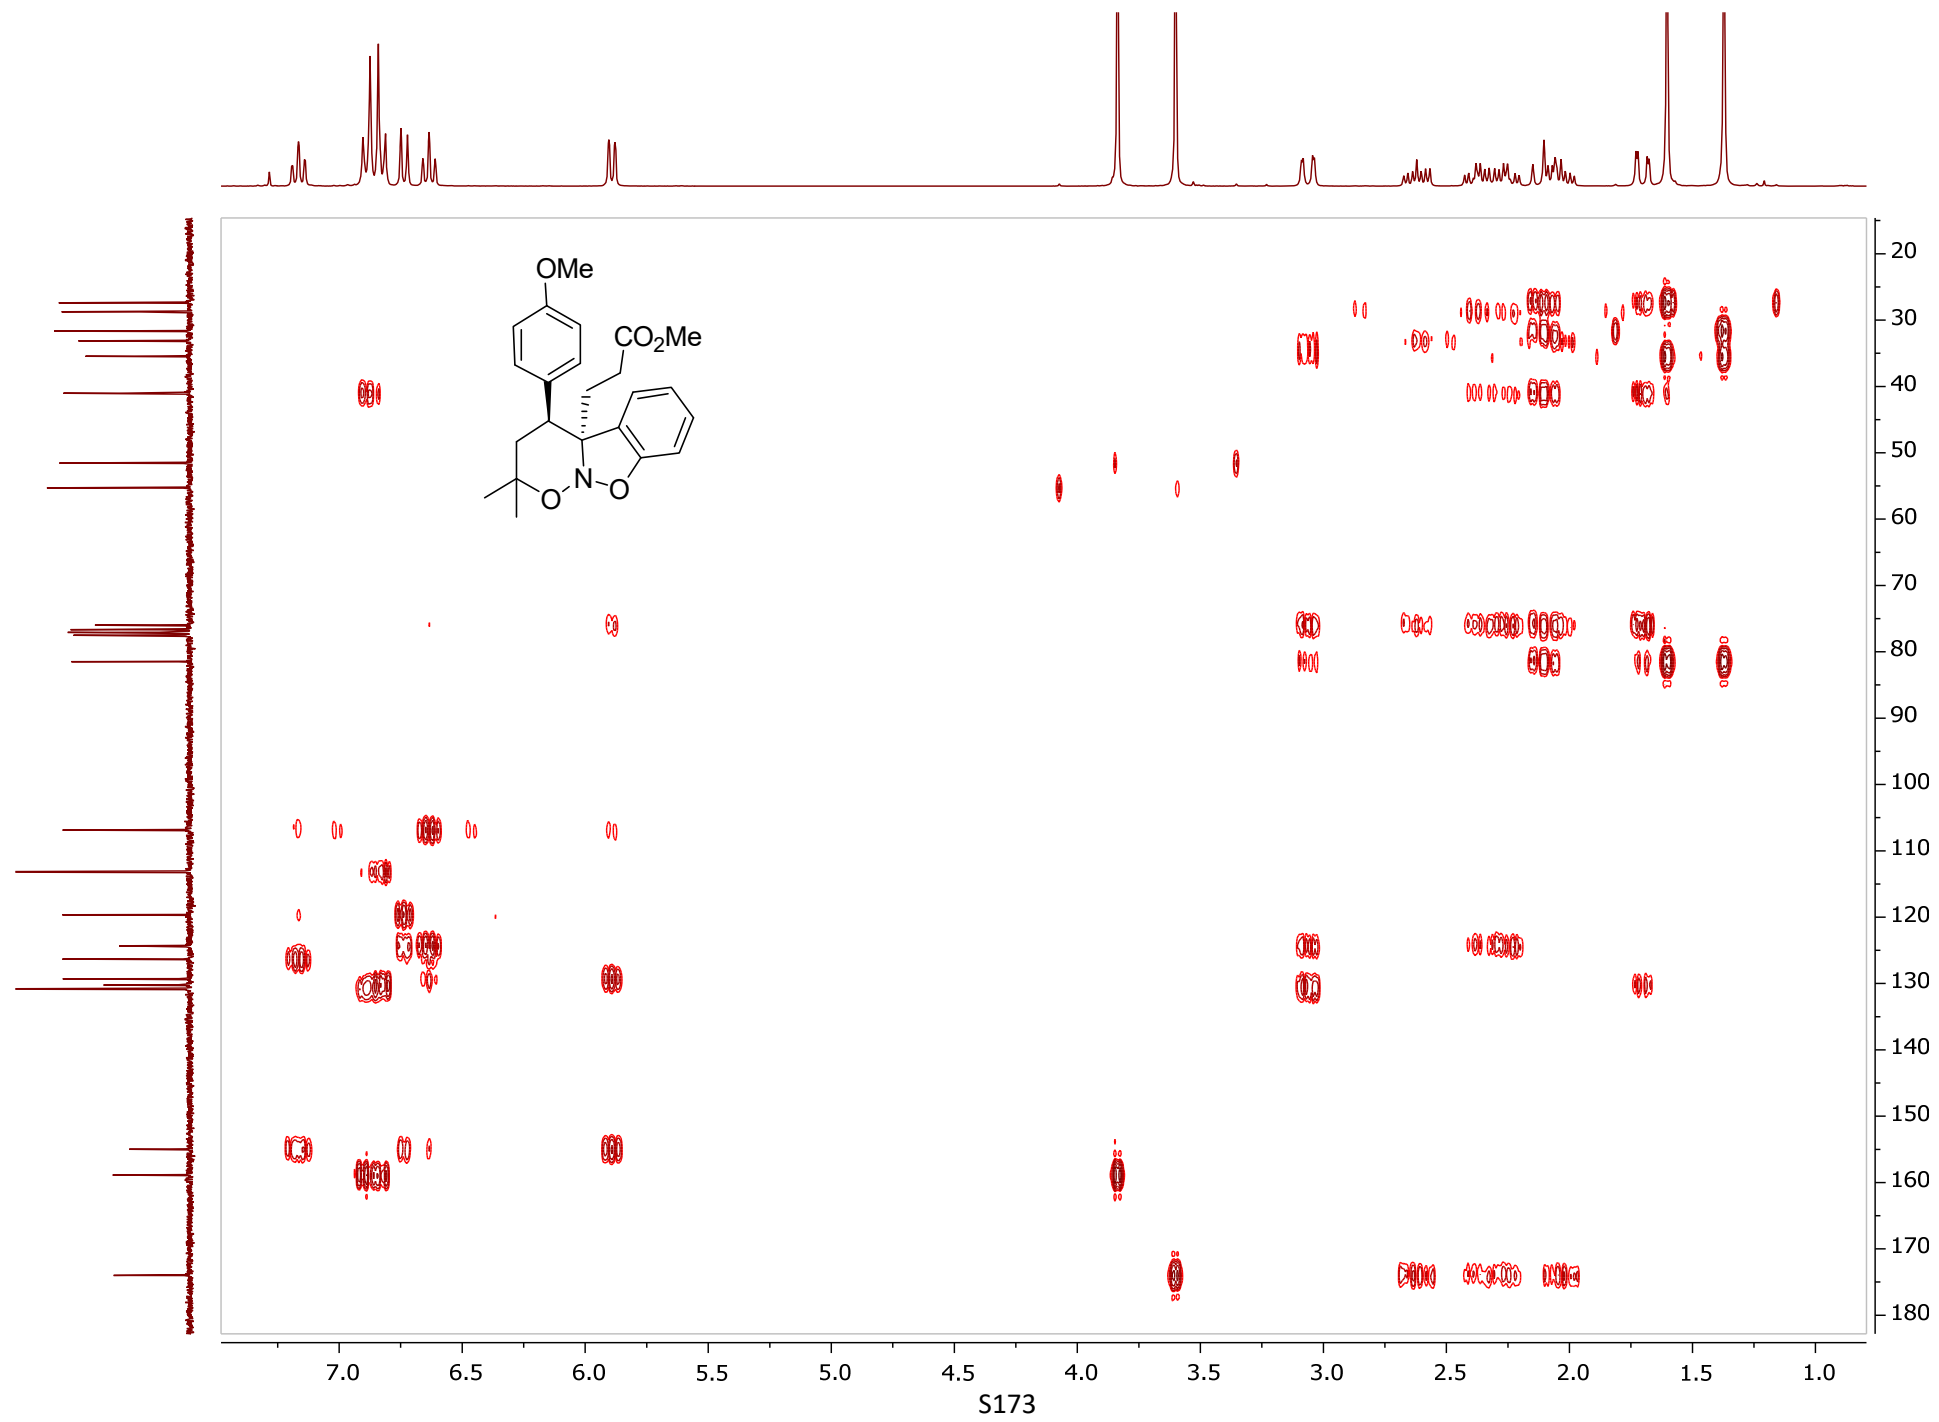

$^1\text{H}$ - $^1\text{H}$  NOESY

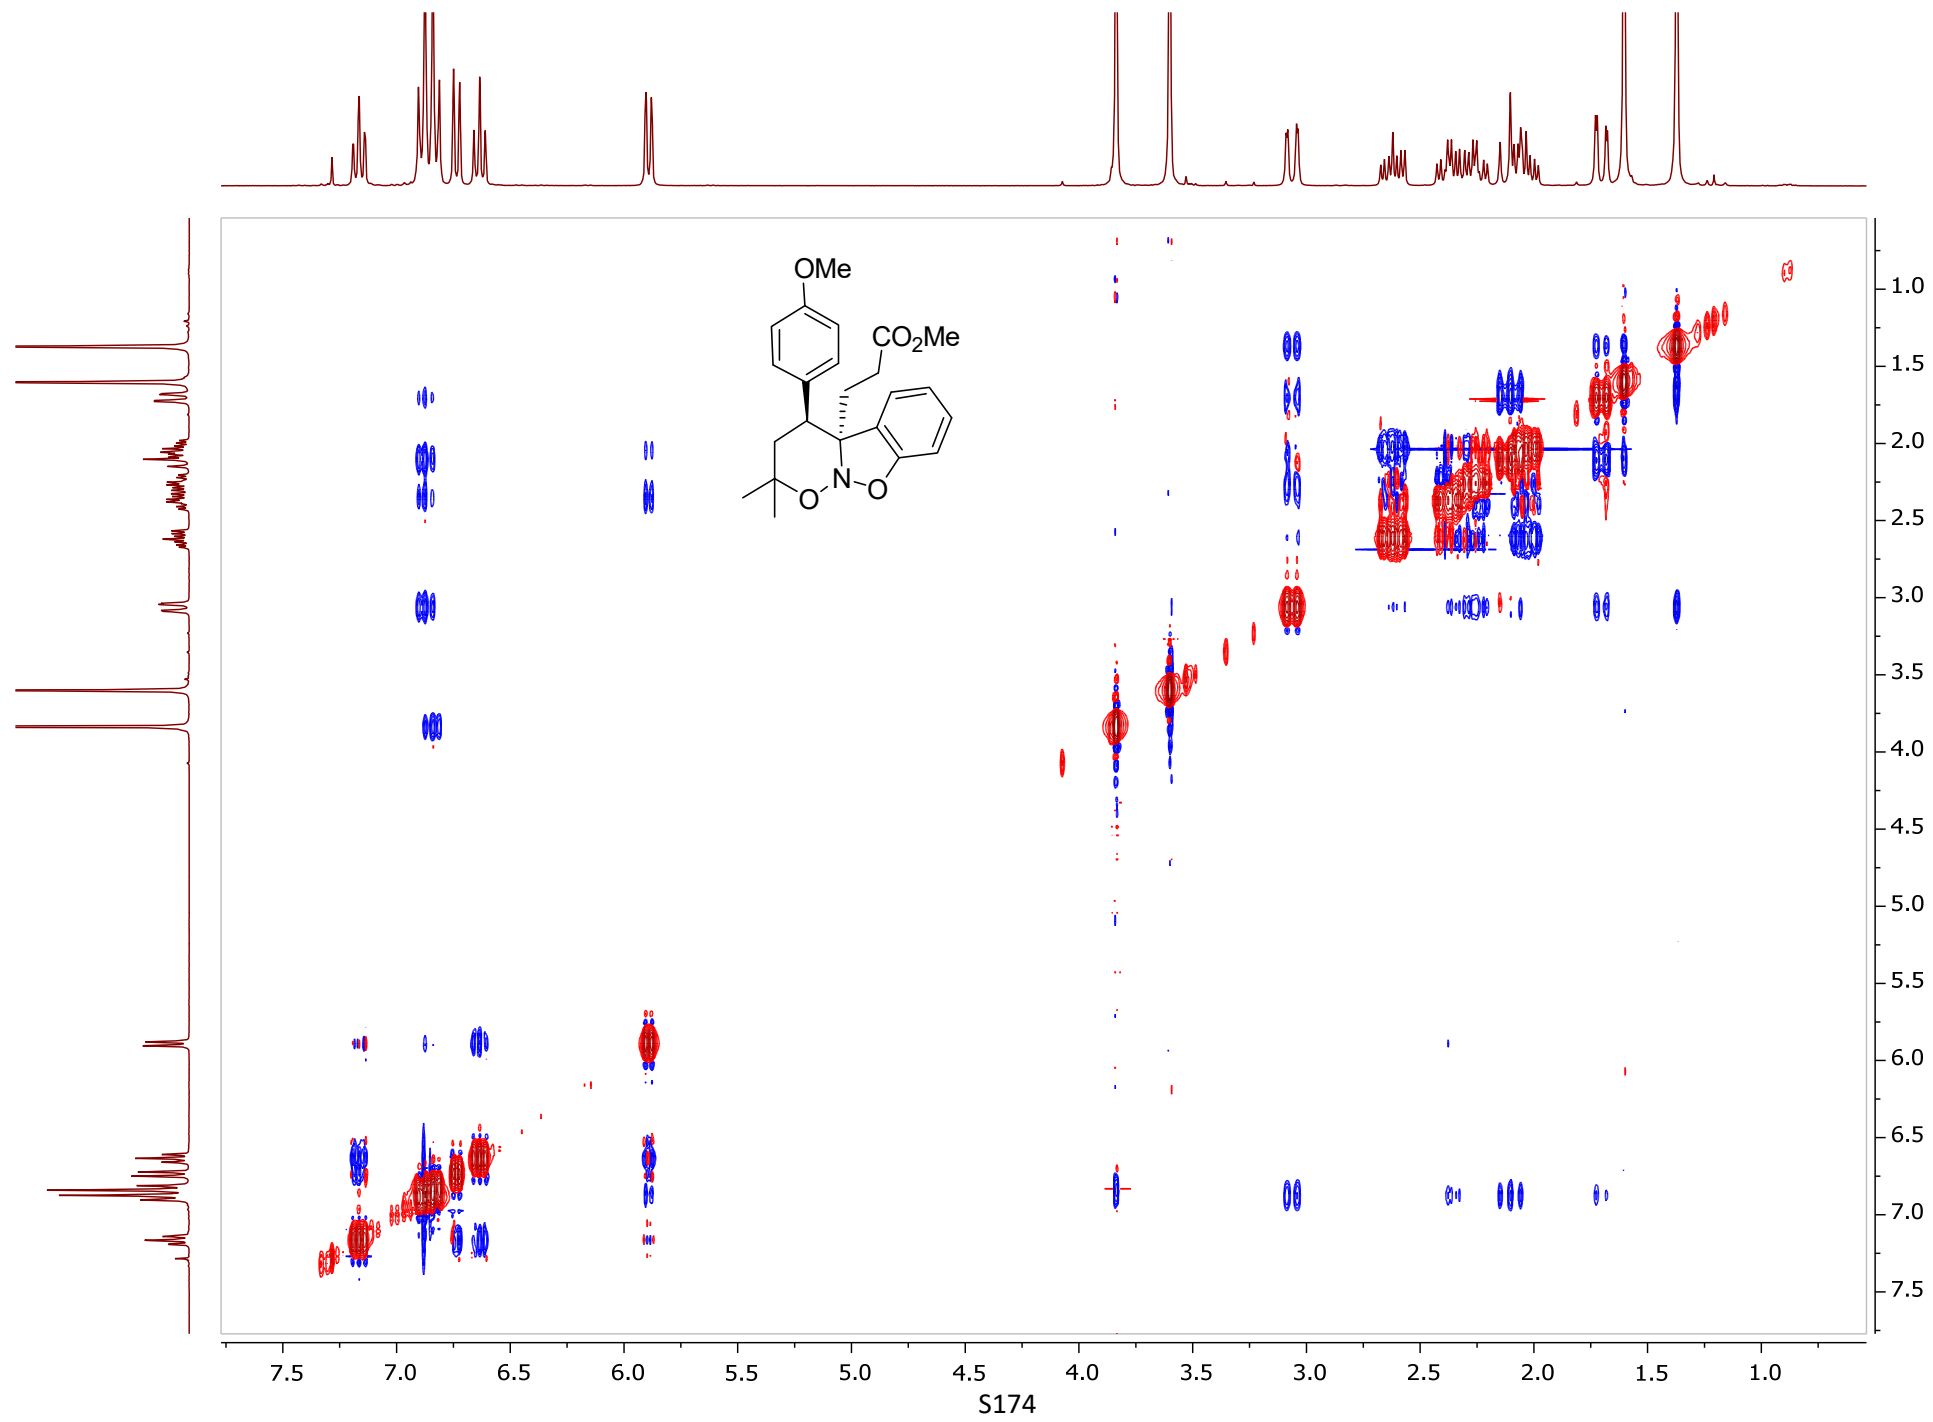

(2*R*\*,4*S*\*,4*aS*\*)-4-(4-Methoxyphenyl)-4a-methyl-2-propyl-2,3,4,4a-tetrahydrobenzo[4,5]isoxazolo[2,3-b][1,2]oxazine 5ia, major / minor = 4:1

<sup>1</sup>H NMR (300 MHz, CDCl<sub>3</sub>)

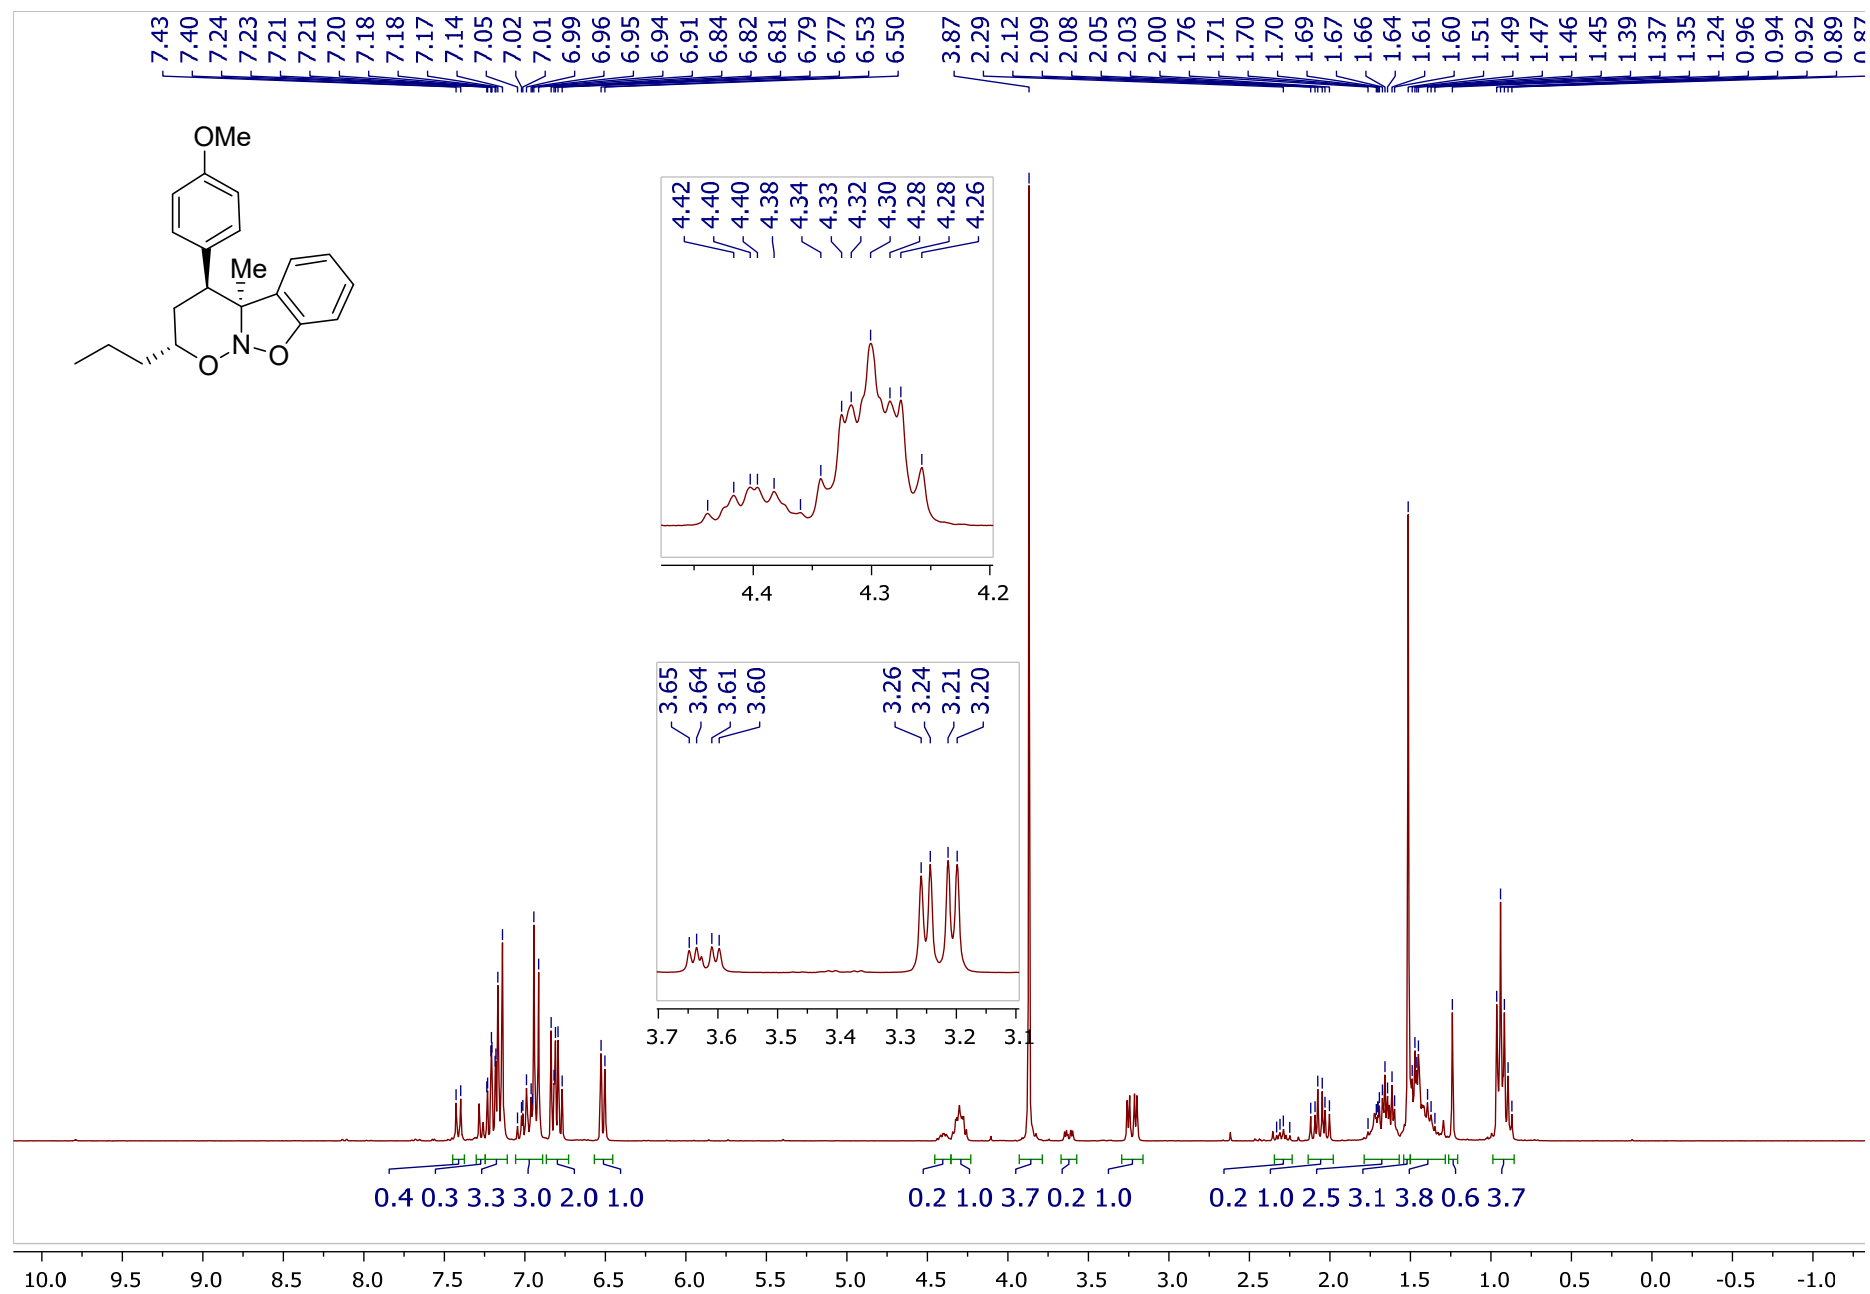

<sup>13</sup>C NMR (75 MHz, CDCl<sub>3</sub>)

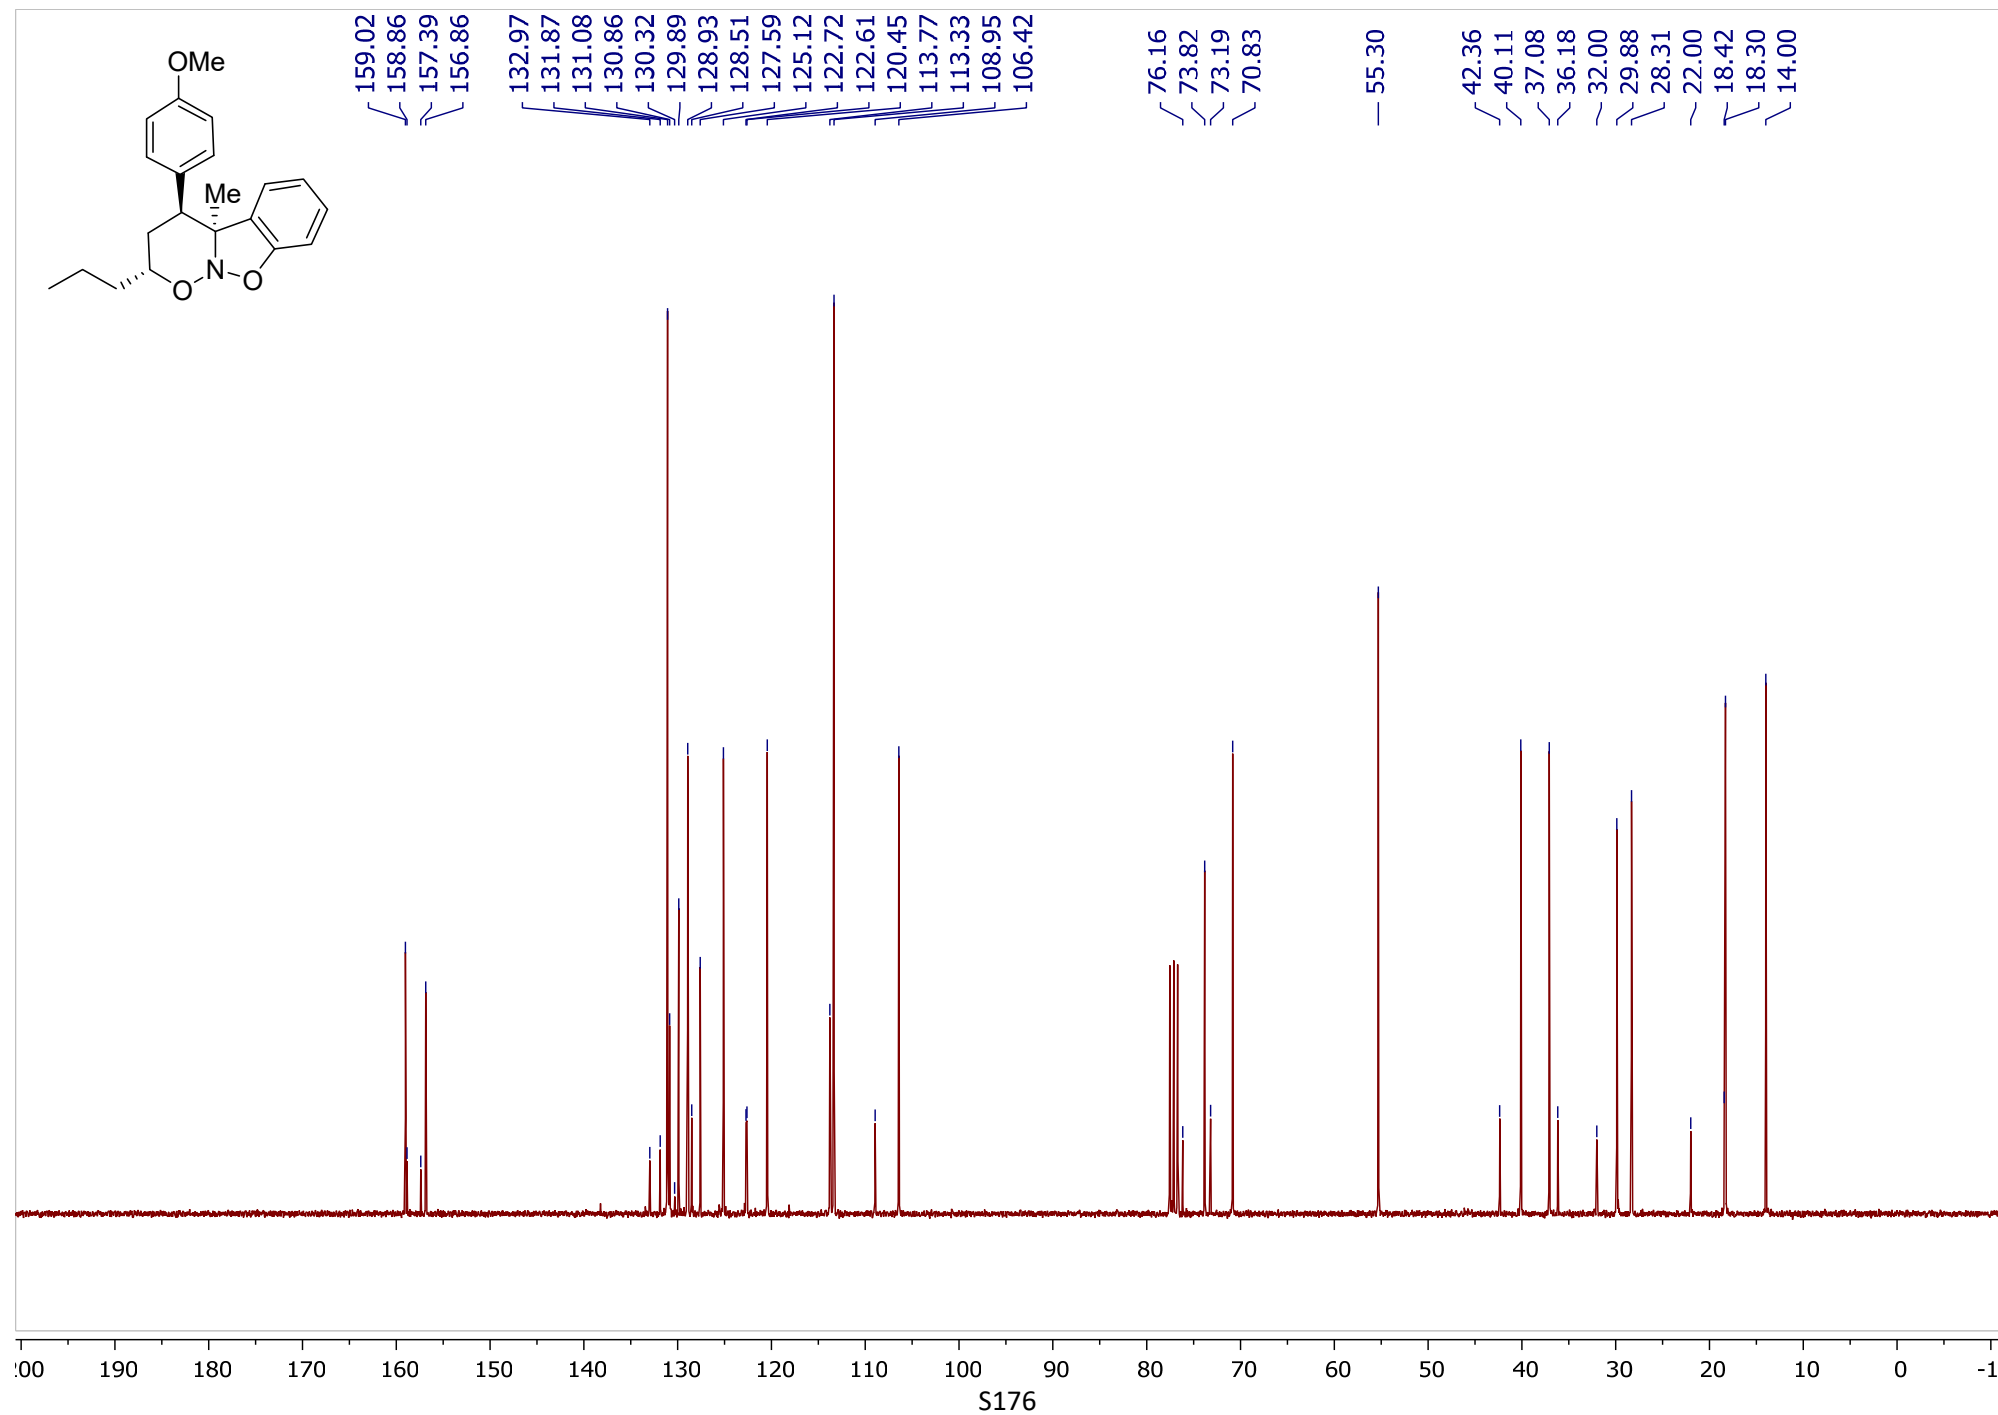



$^{13}\text{C}$  DEPT 135 (75 MHz,  $\text{CDCl}_3$ )

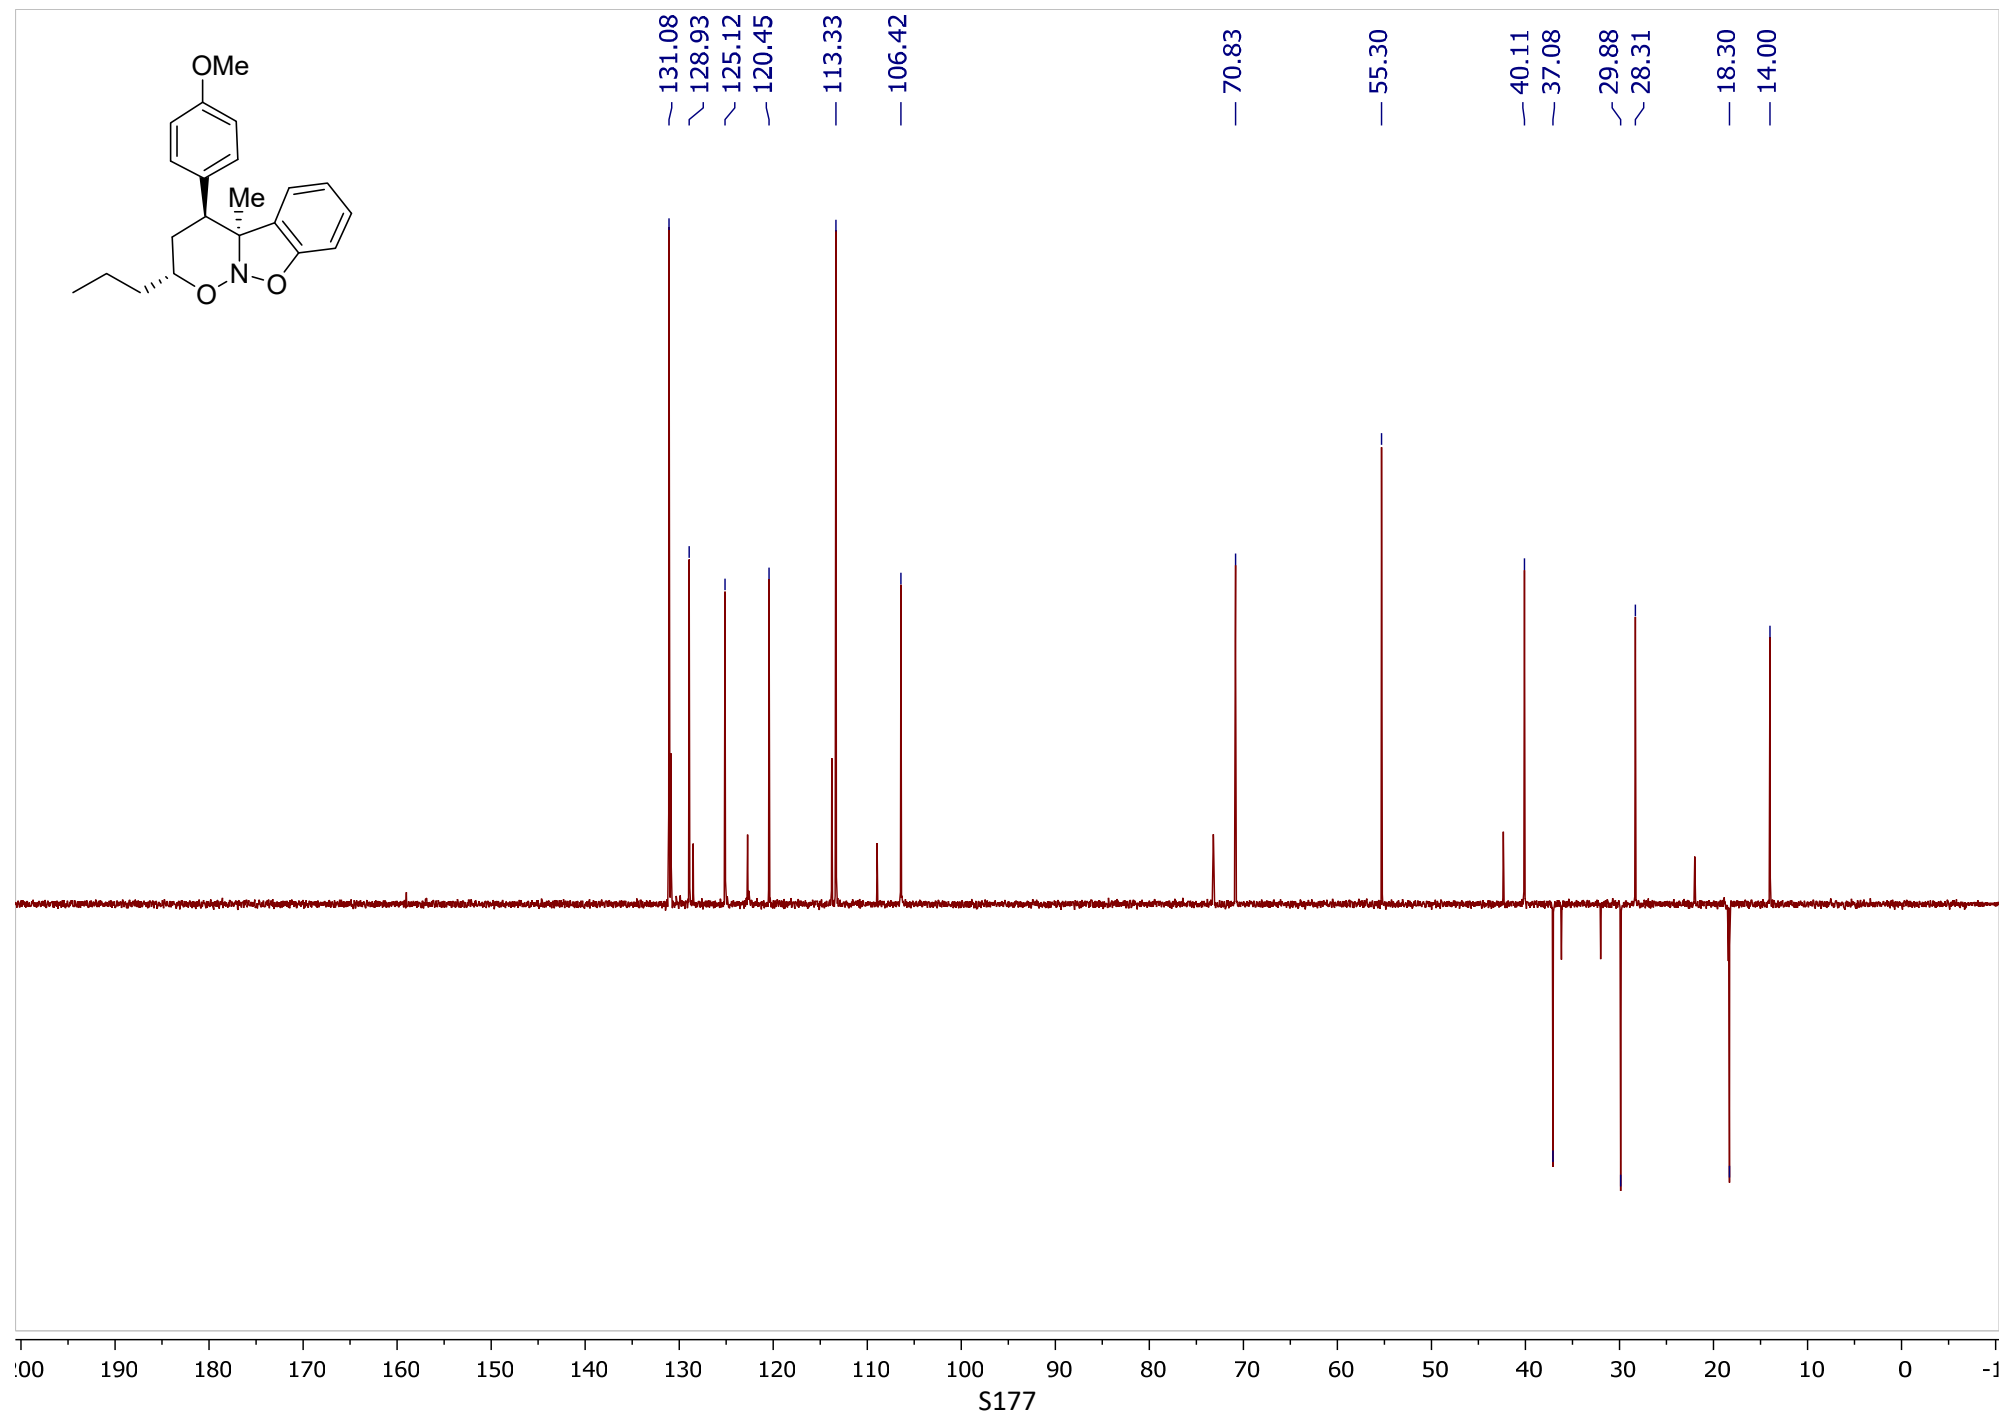

$^1\text{H}$ - $^1\text{H}$  COSY

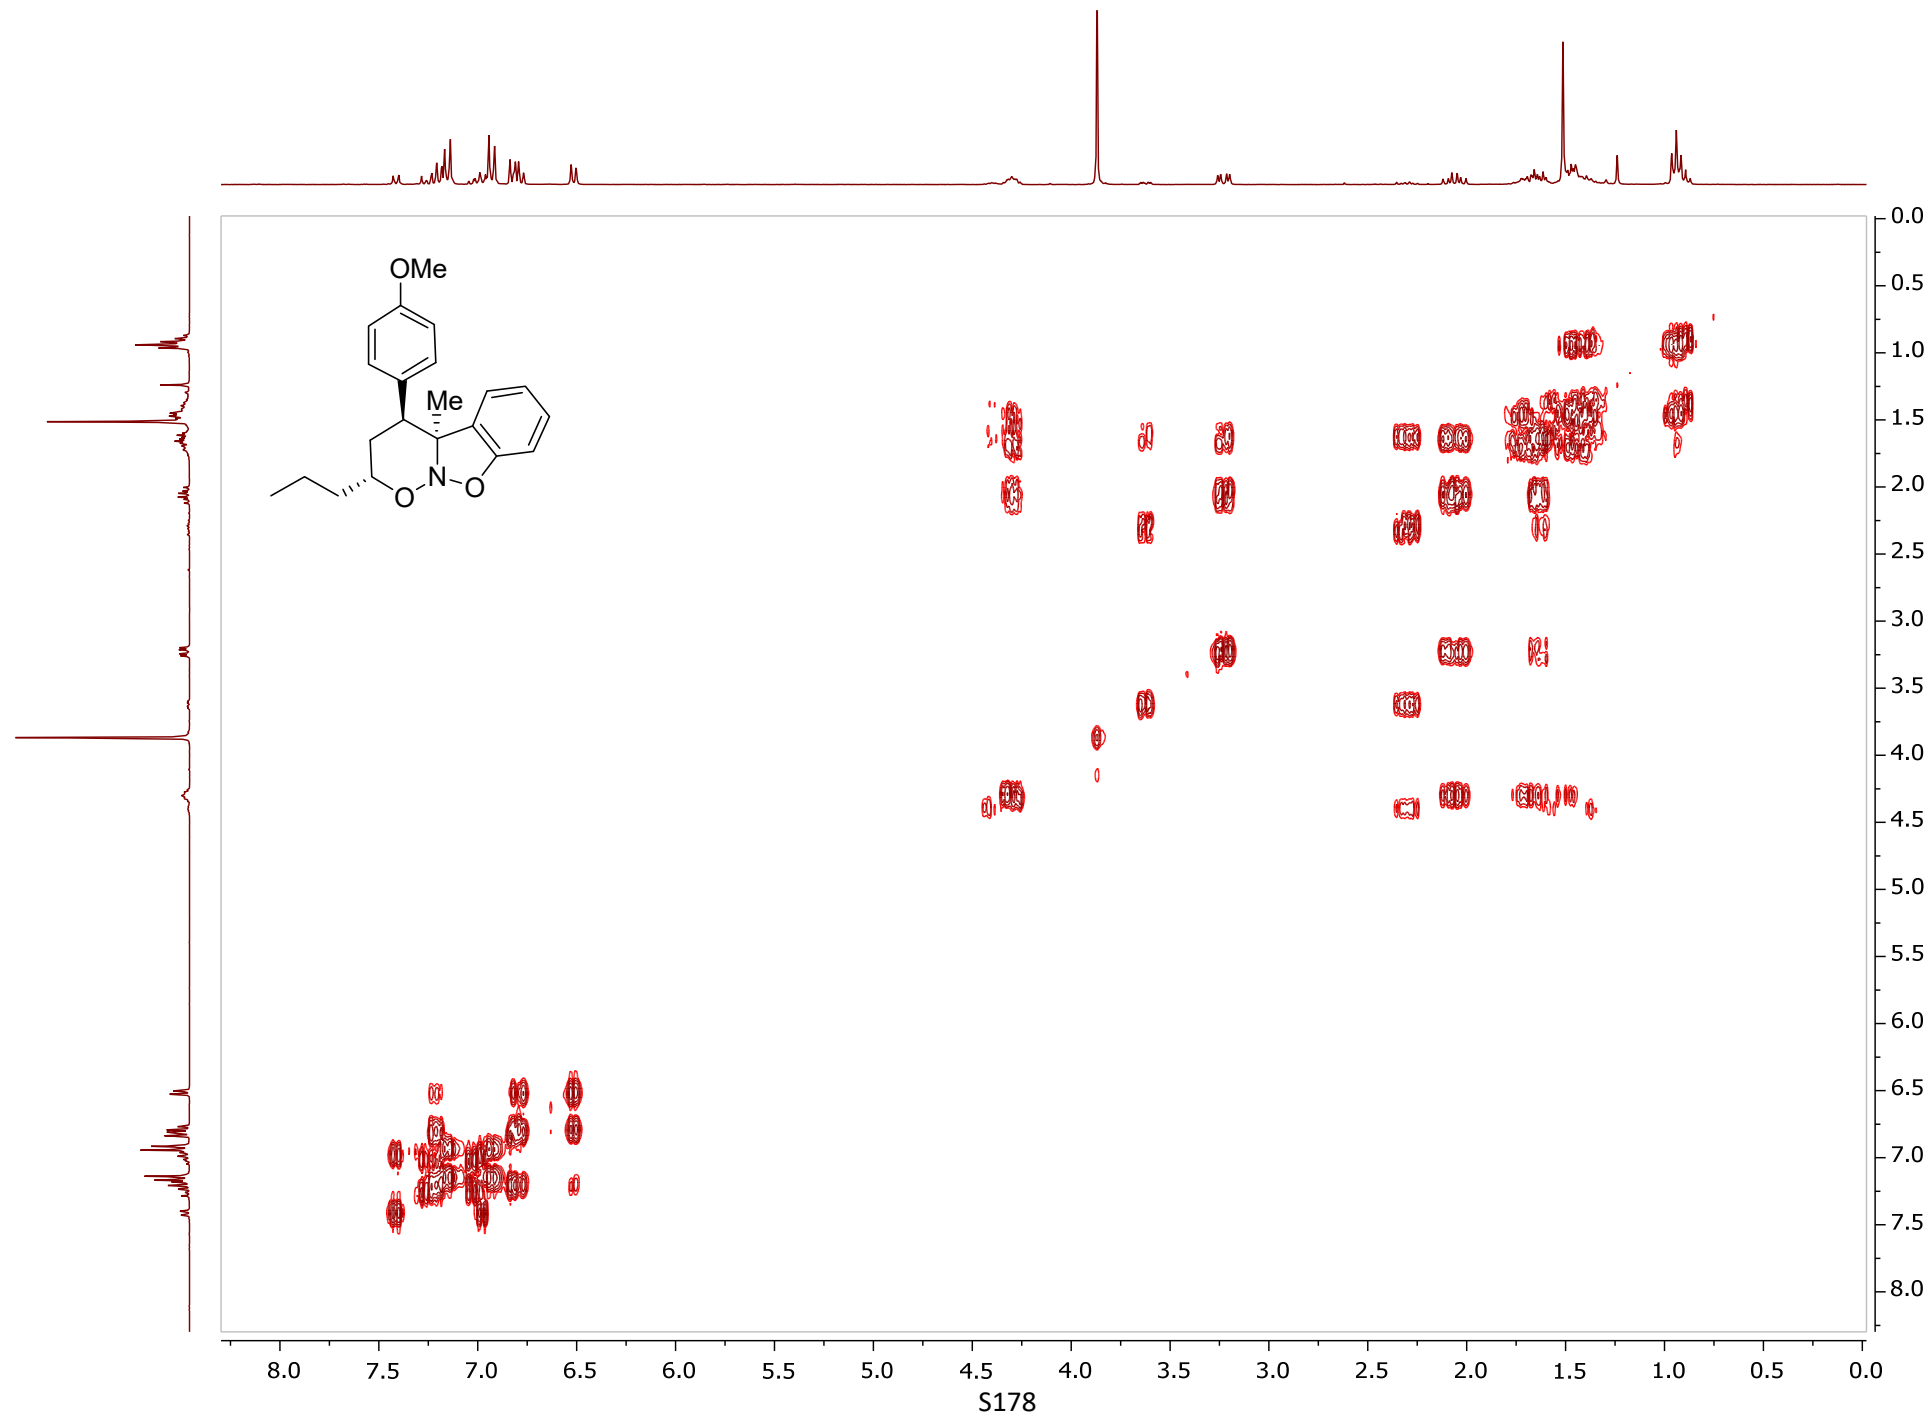

$^1\text{H}$ - $^{13}\text{C}$  HSQC

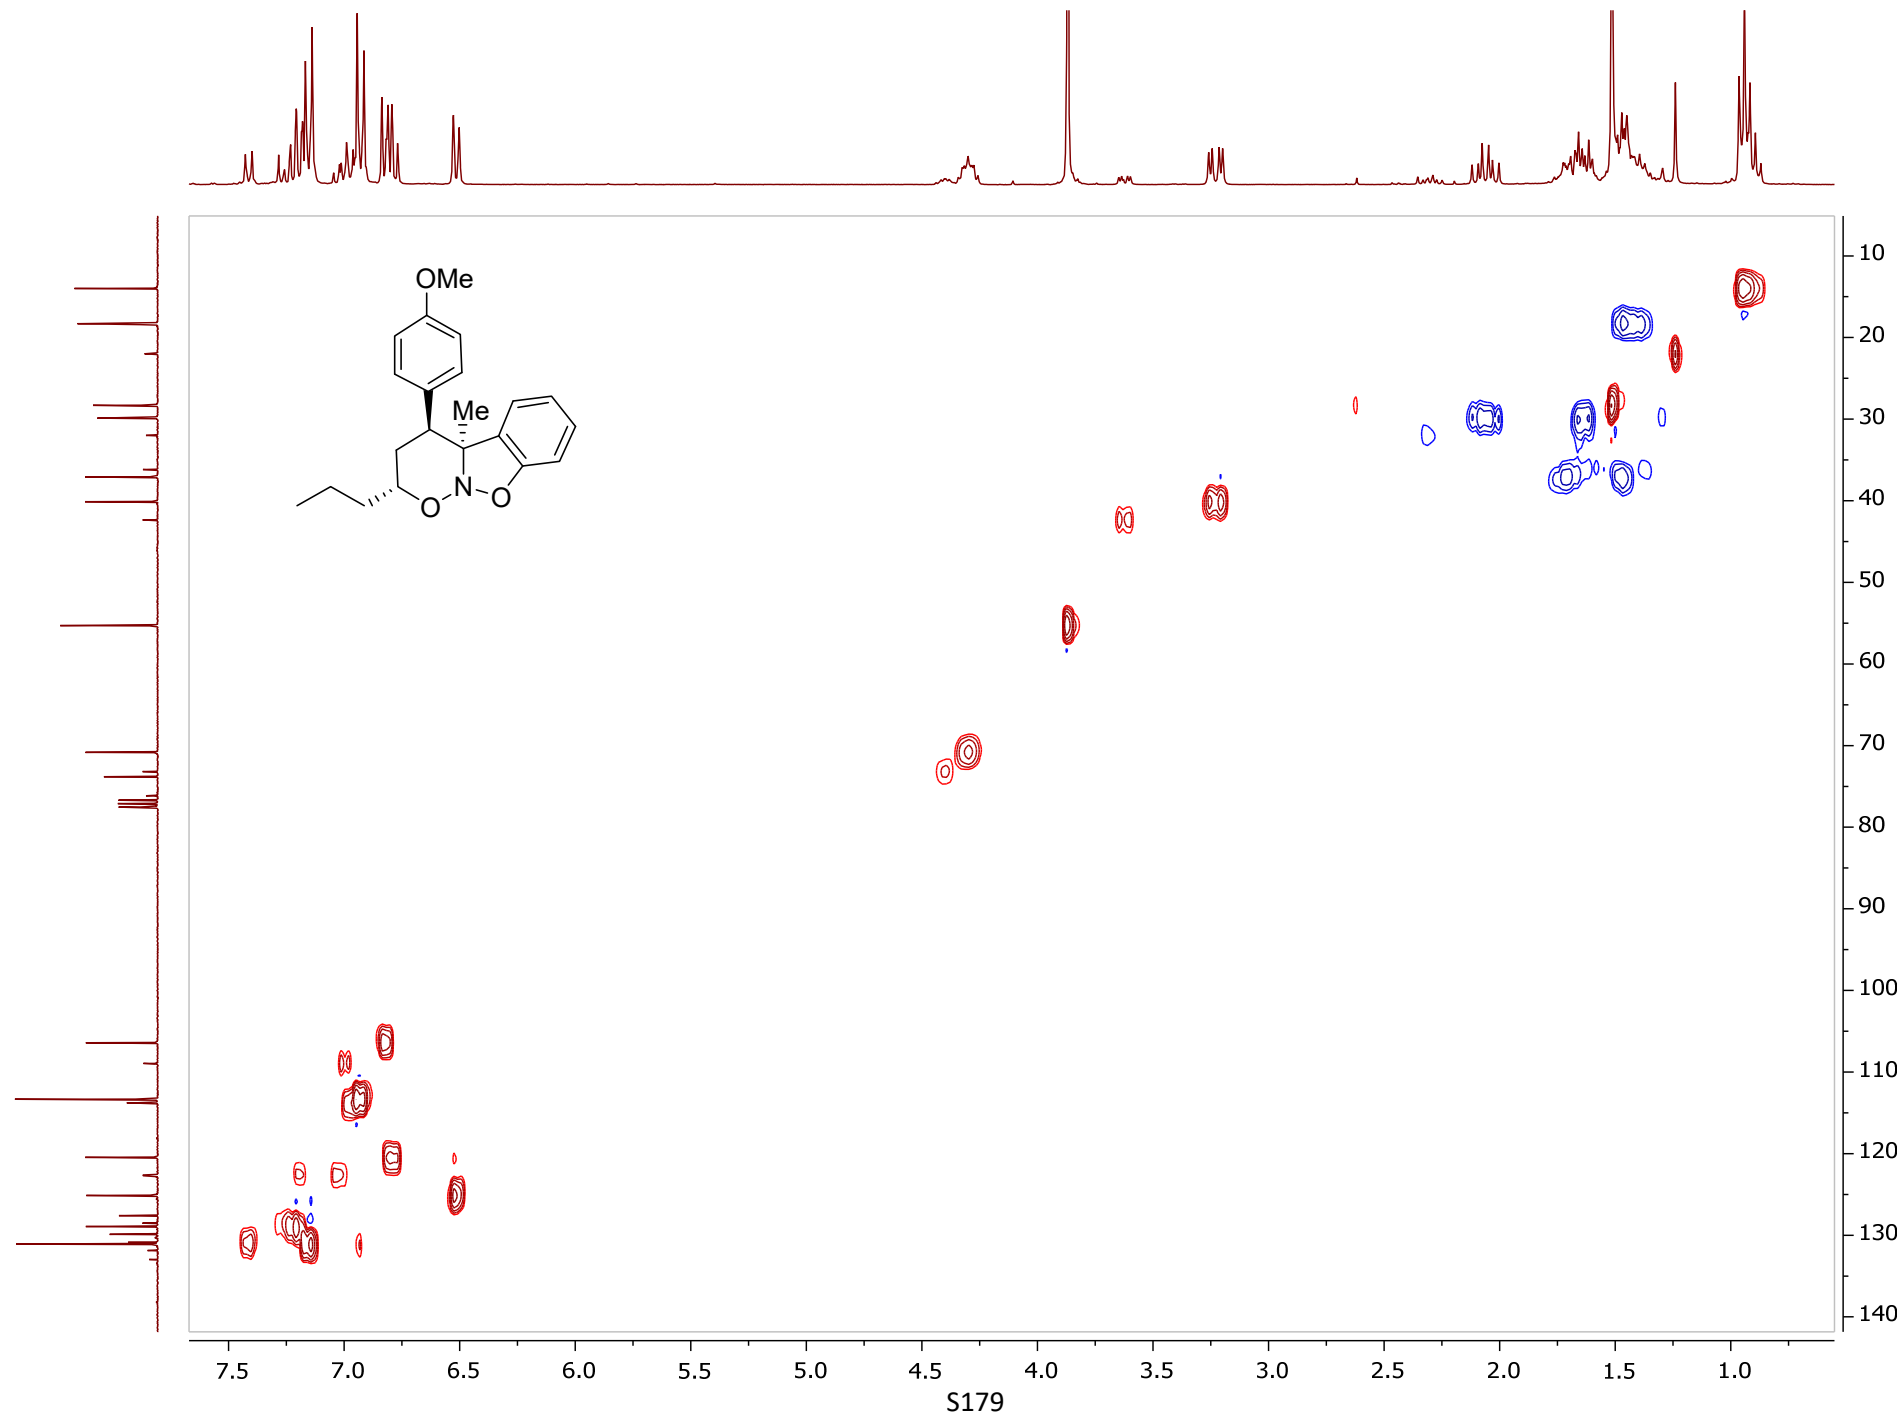

$^1\text{H}$ - $^{13}\text{C}$  HMBC

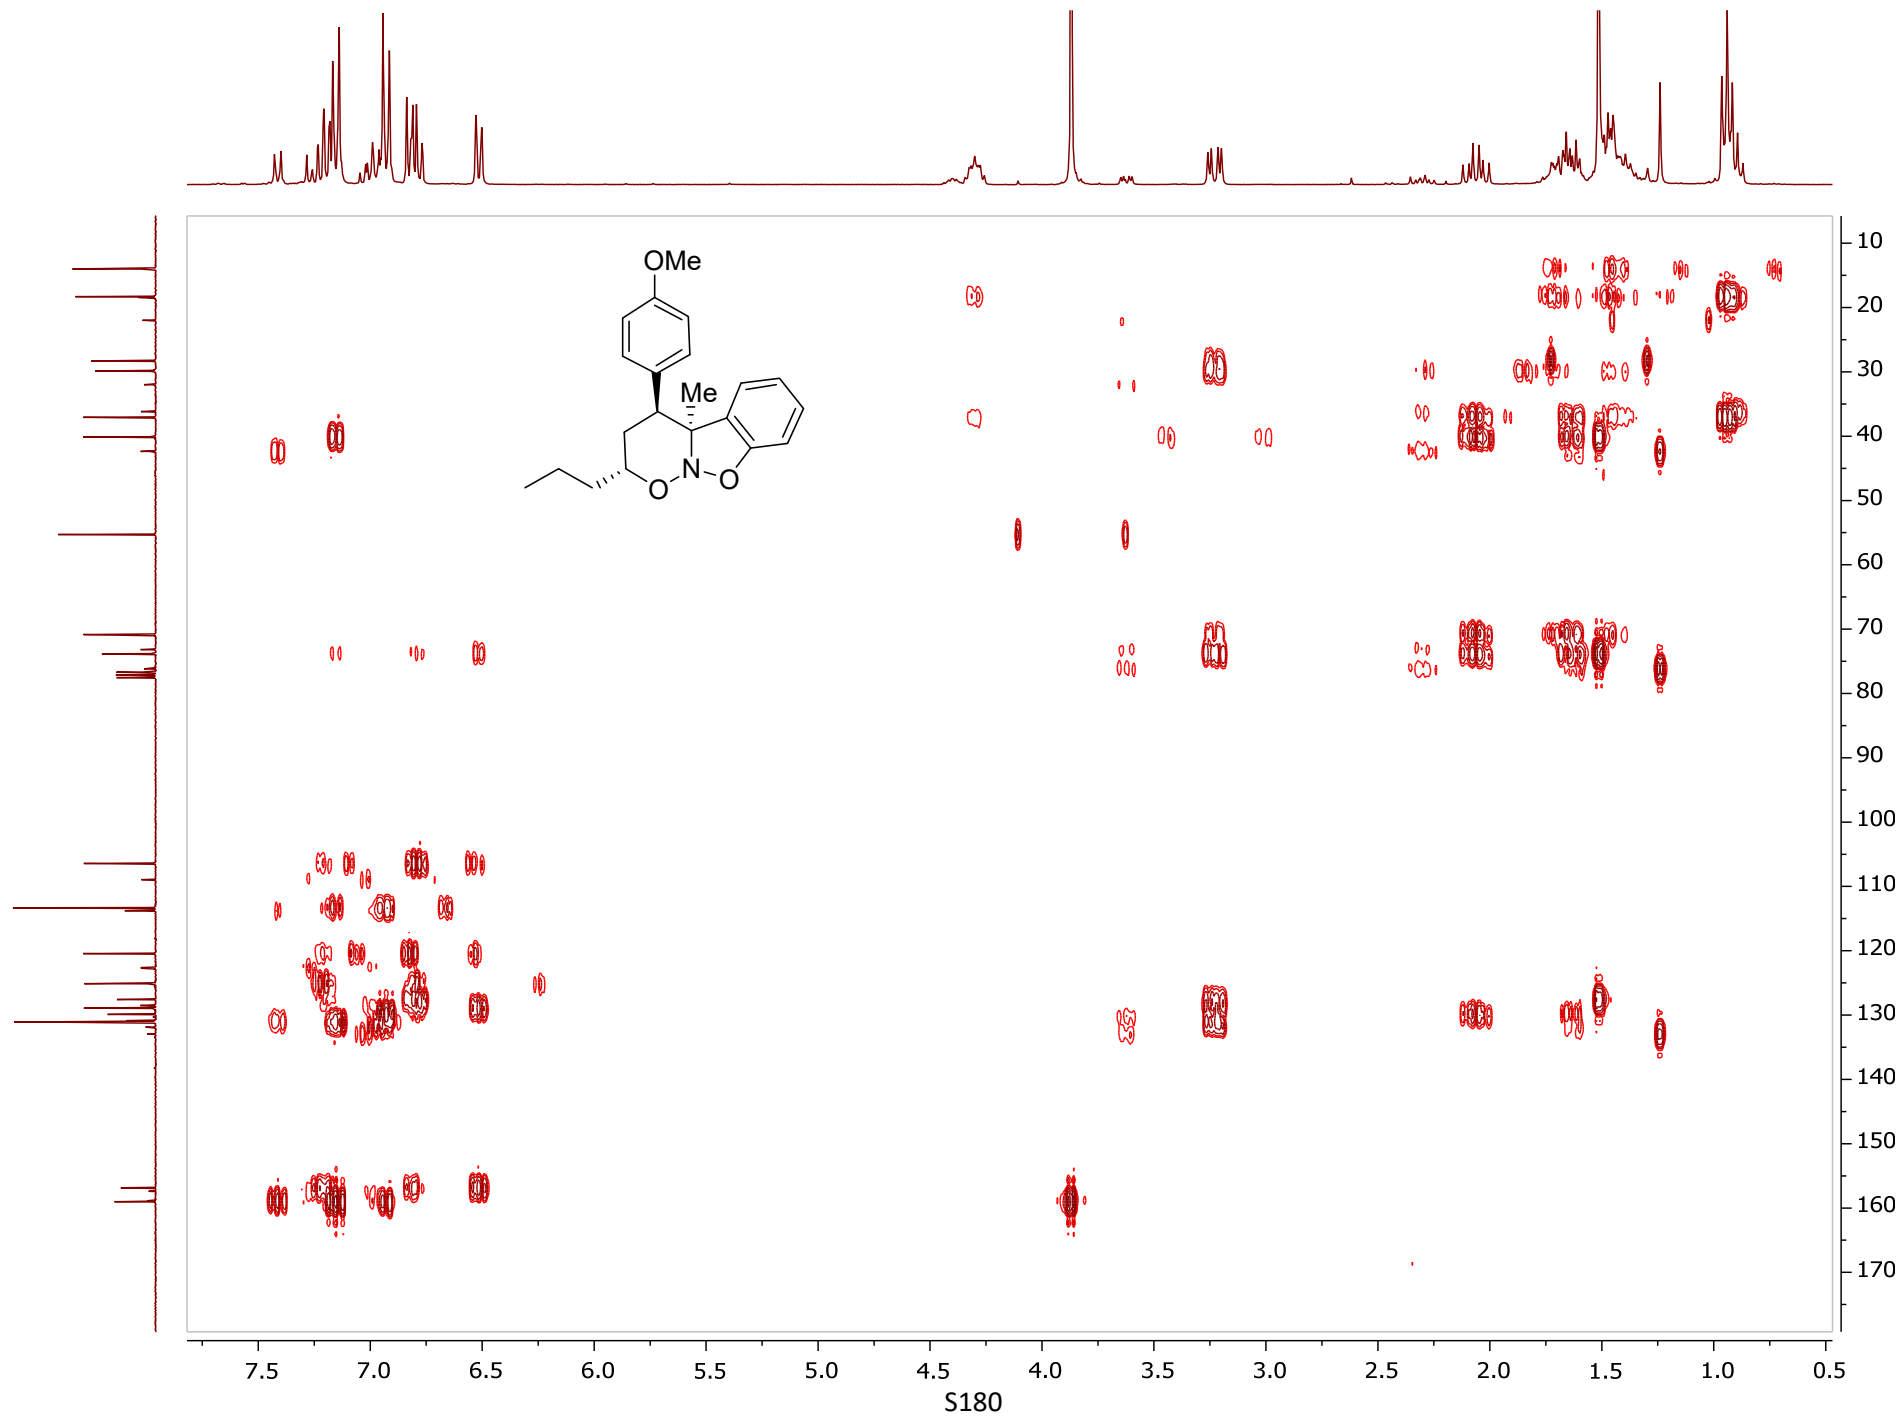

$^1\text{H}$ - $^1\text{H}$  NOESY

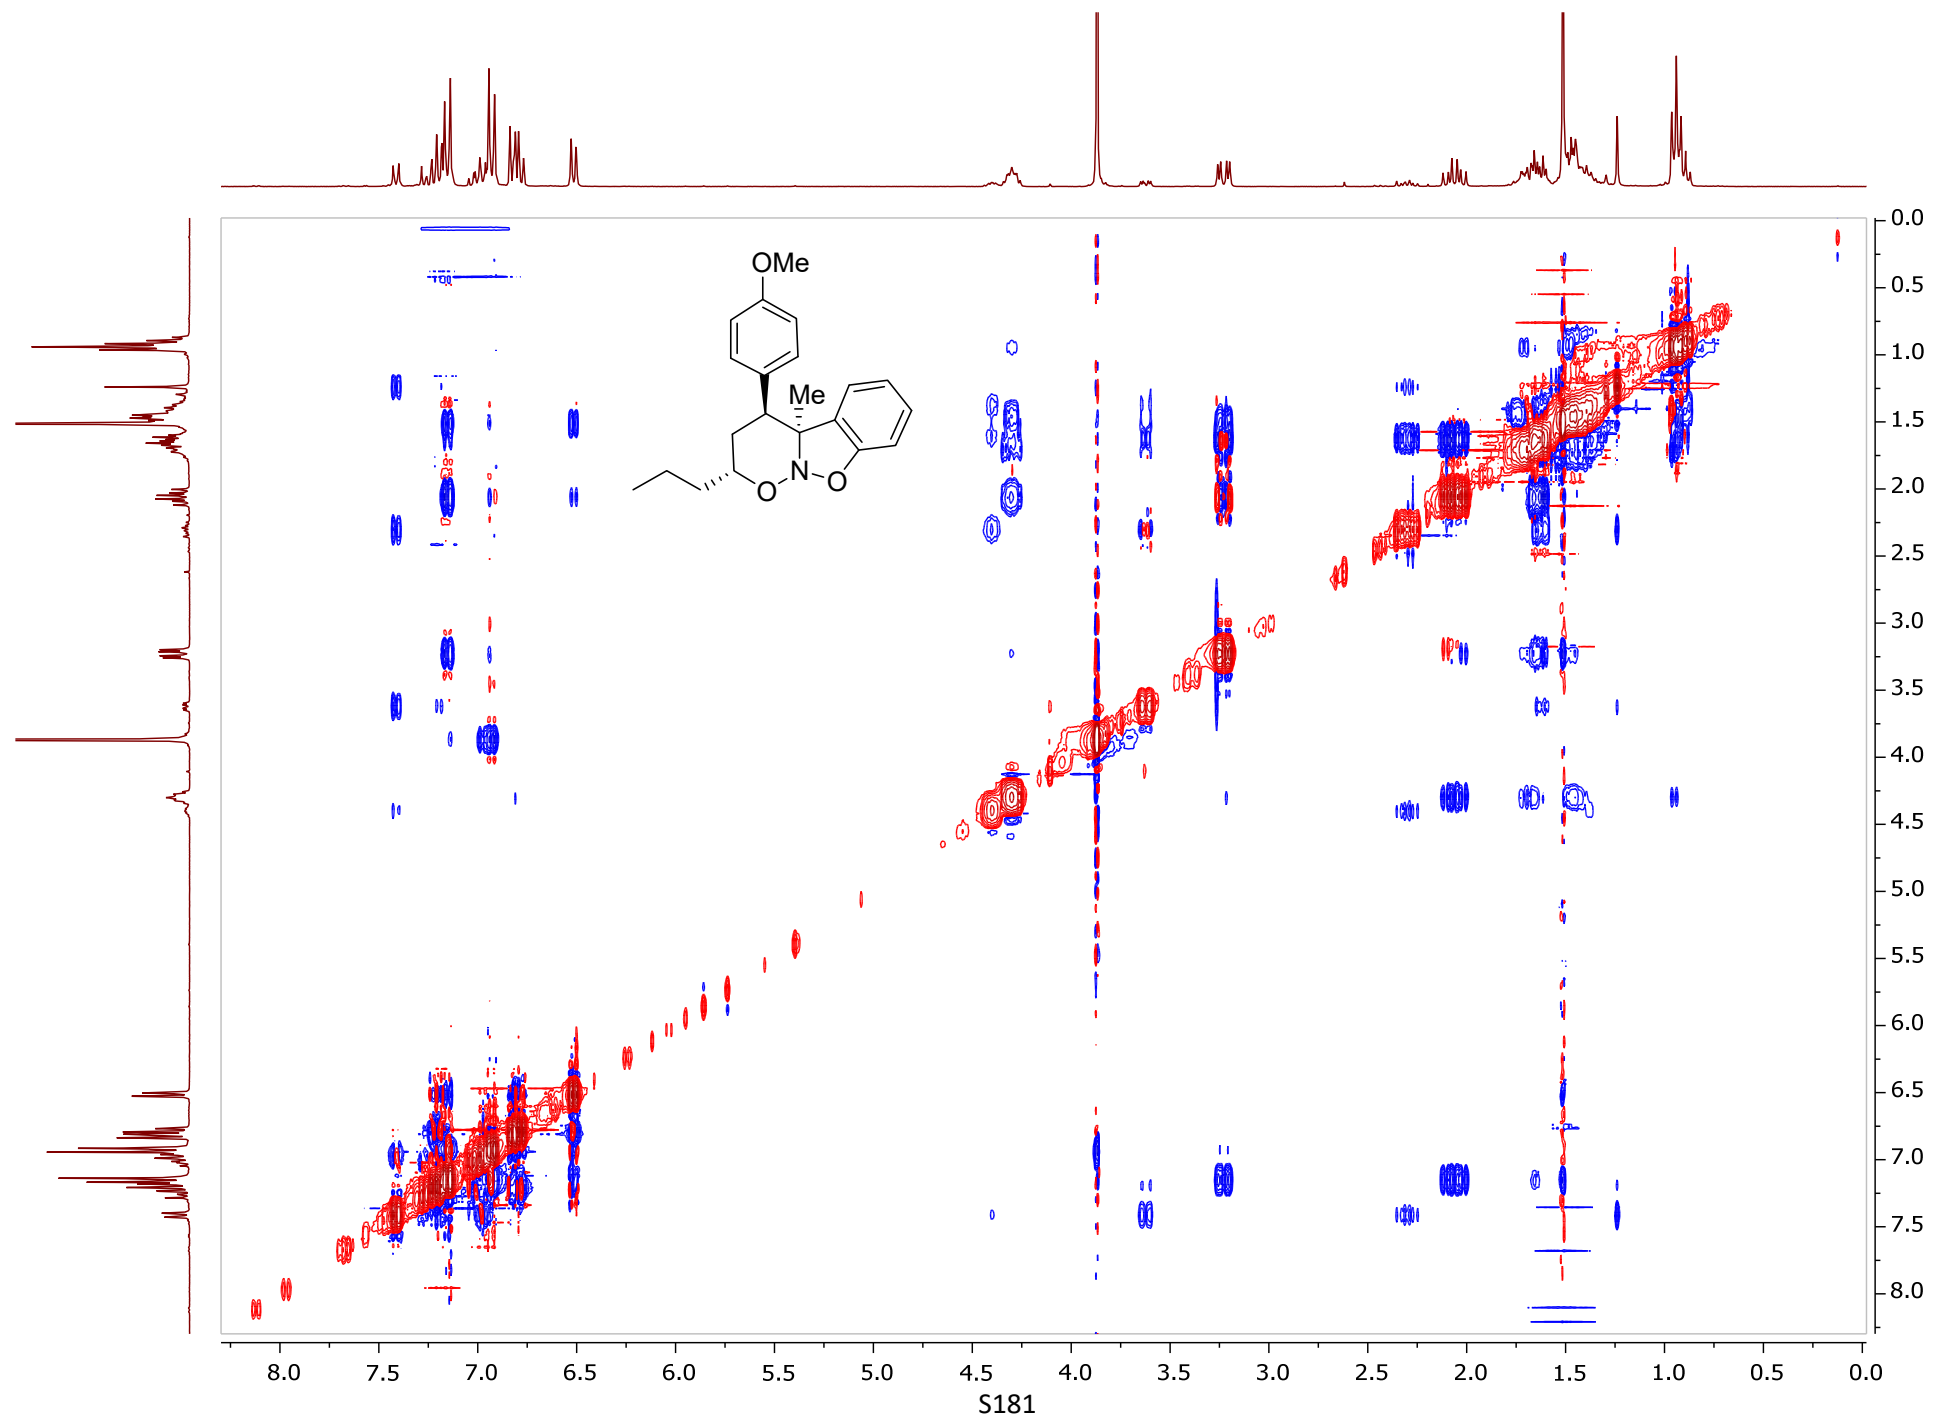

**(2*R*\*,4*S*\*,4*aS*\*)-4-(4-Methoxyphenyl)-4a-methyl-2-phenyl-2,3,4,4a-tetrahydrobenzo[4,5]isoxazolo[2,3-b][1,2]oxazine 5ja**

<sup>1</sup>H NMR (300 MHz, CDCl<sub>3</sub>)

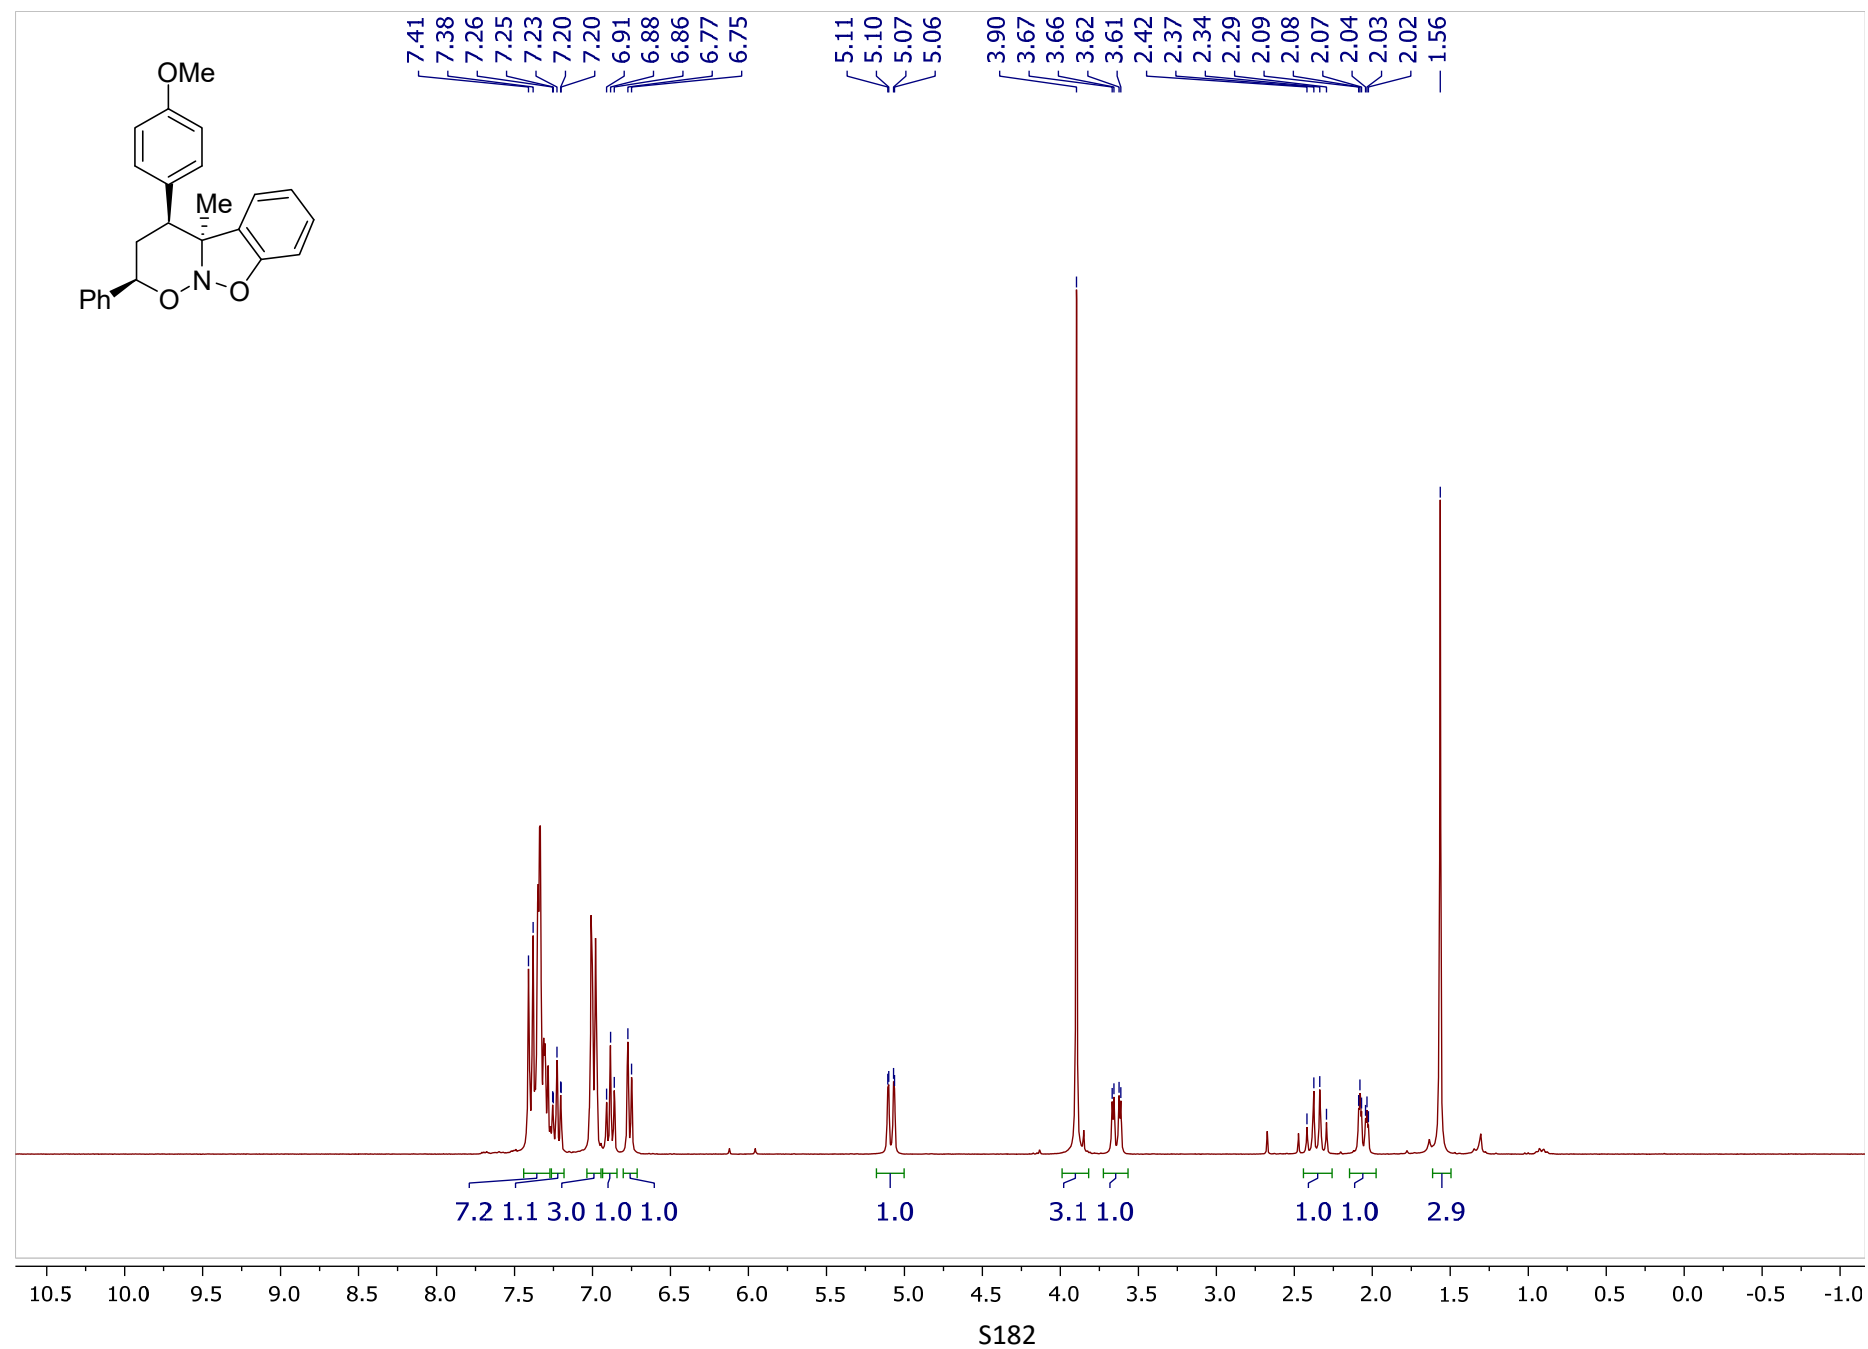

<sup>13</sup>C NMR (75 MHz, CDCl<sub>3</sub>)

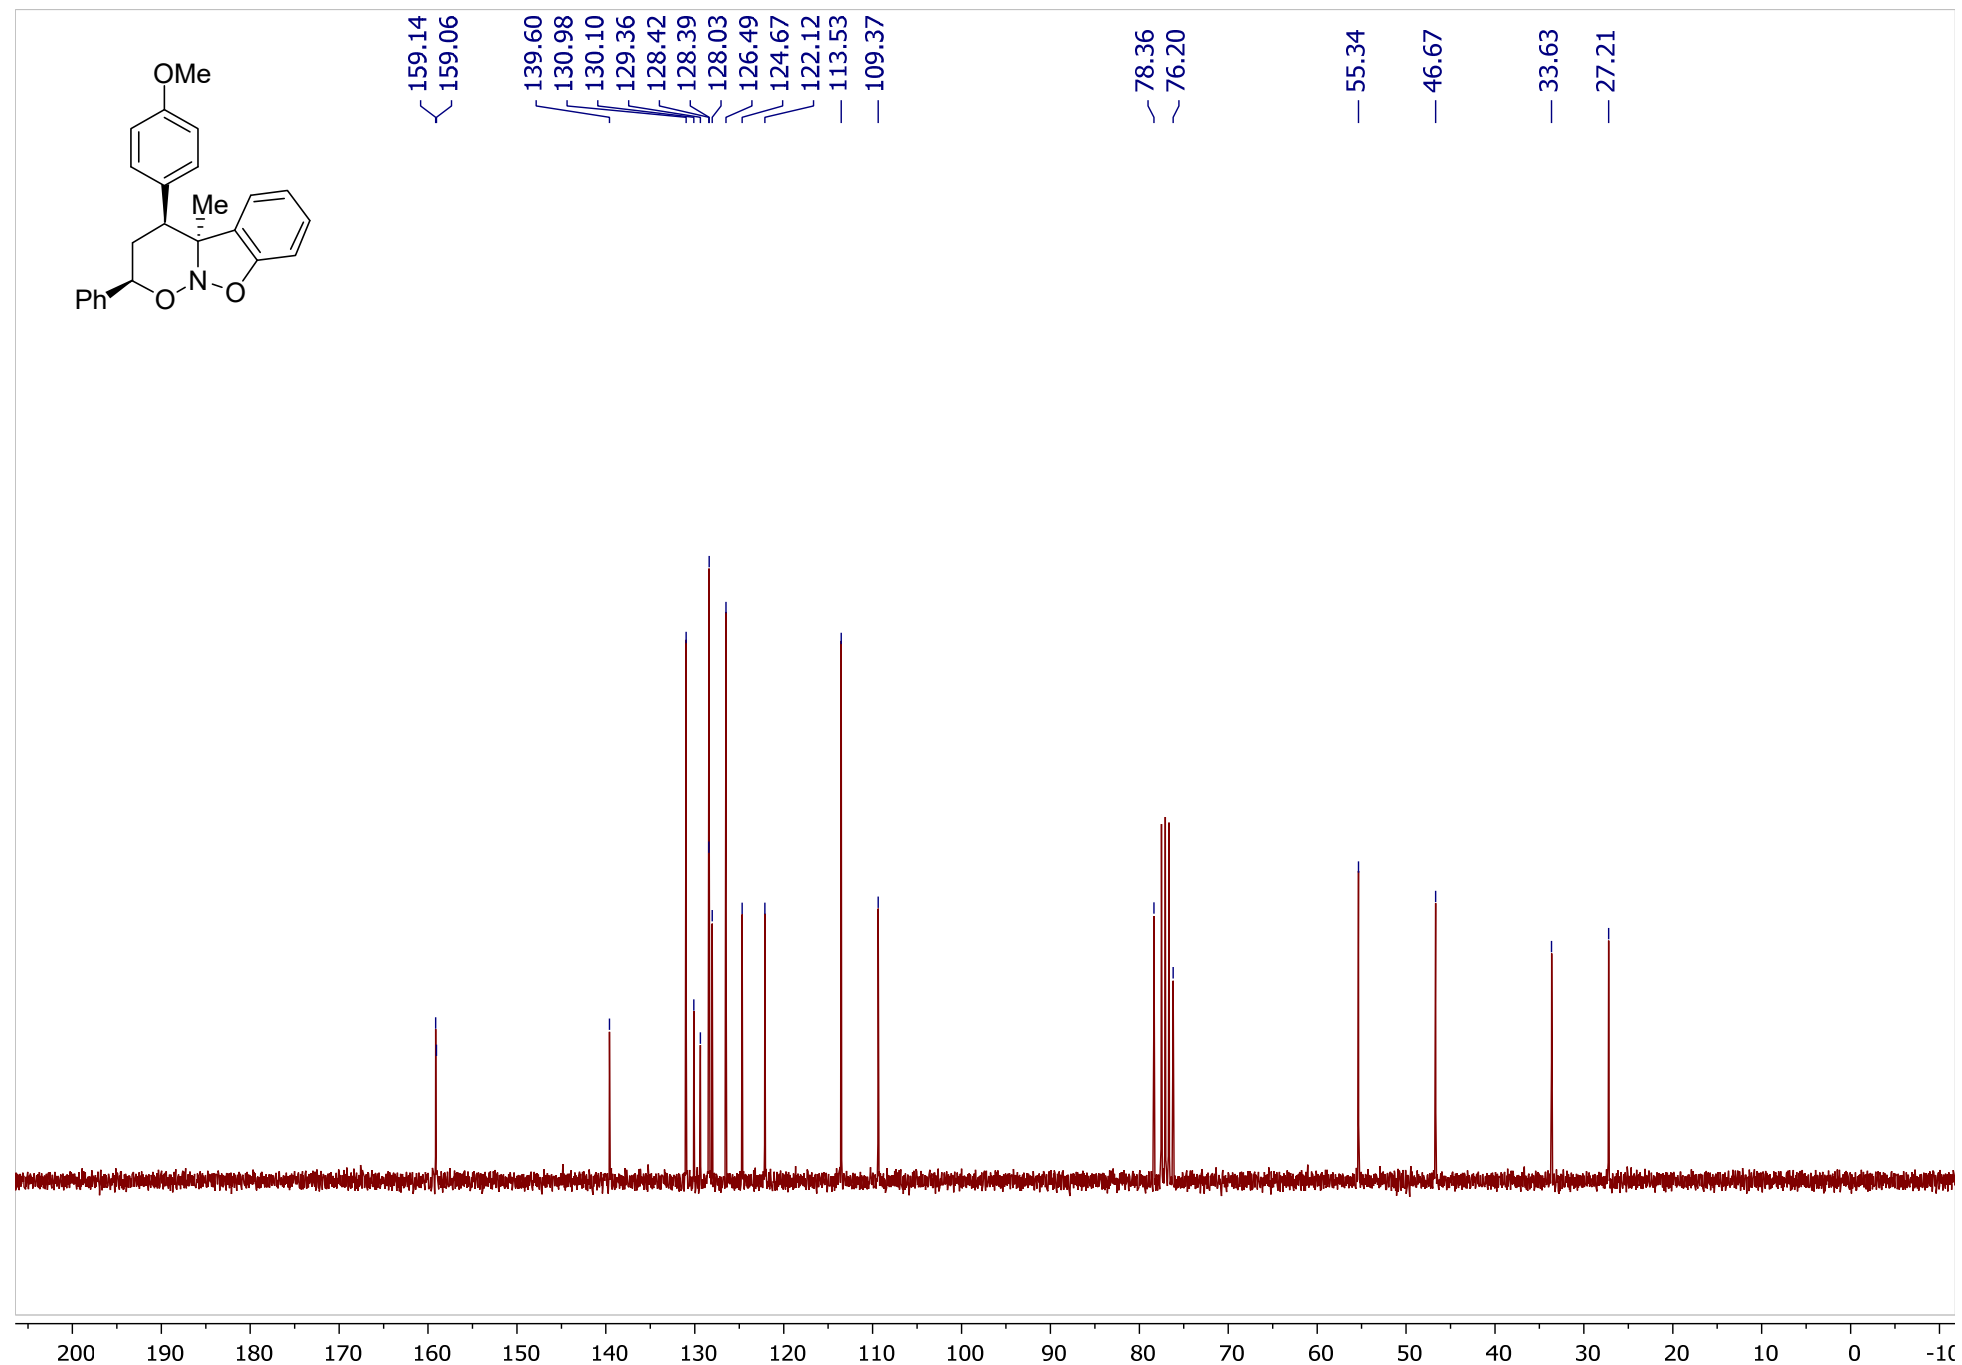

$^{13}\text{C}$  DEPT 135 (75 MHz,  $\text{CDCl}_3$ )

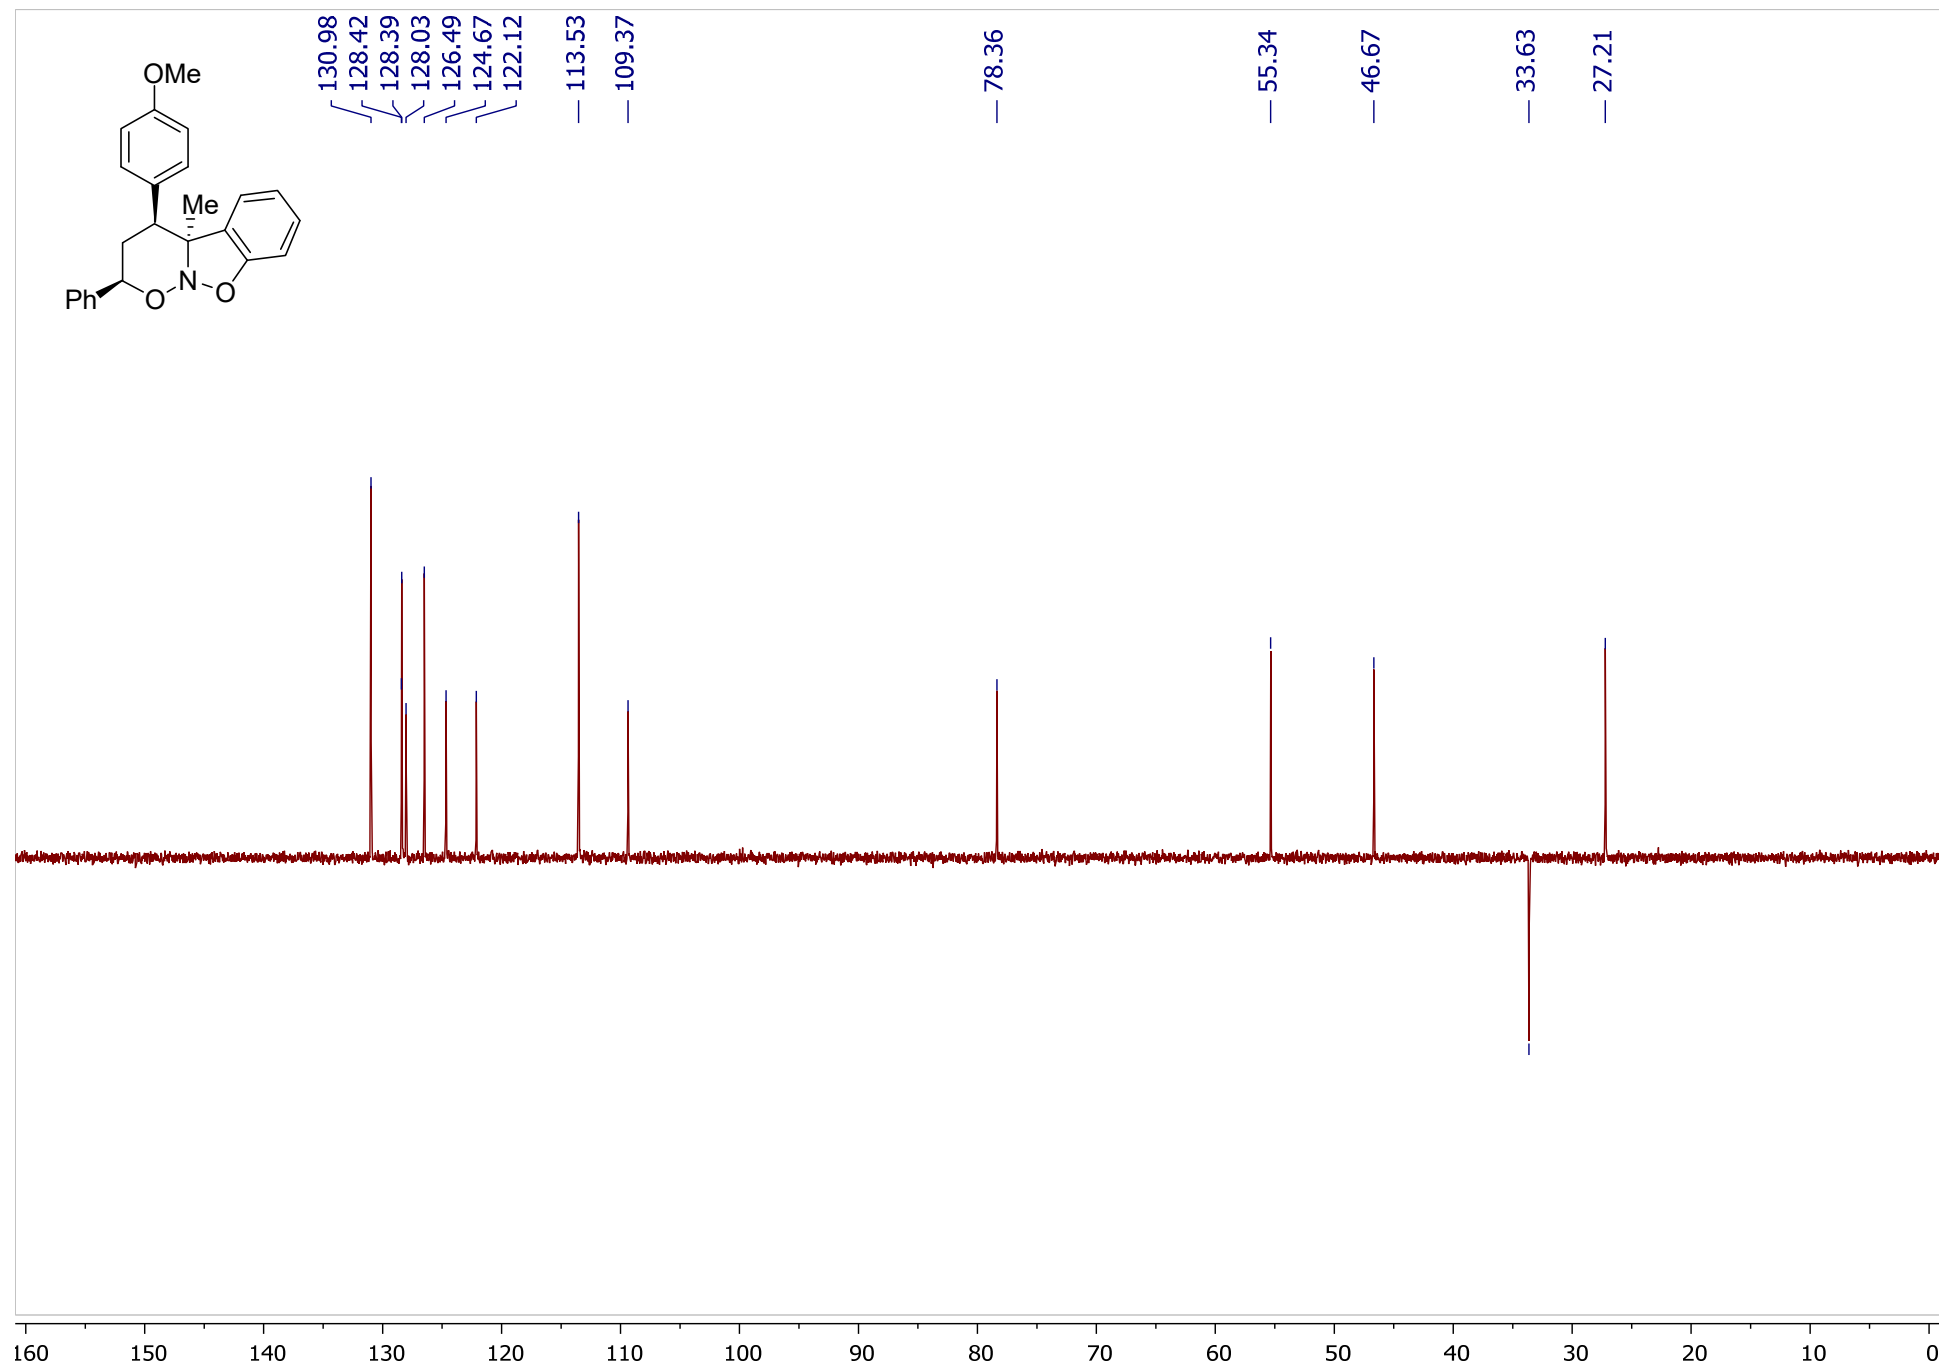



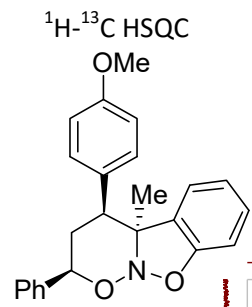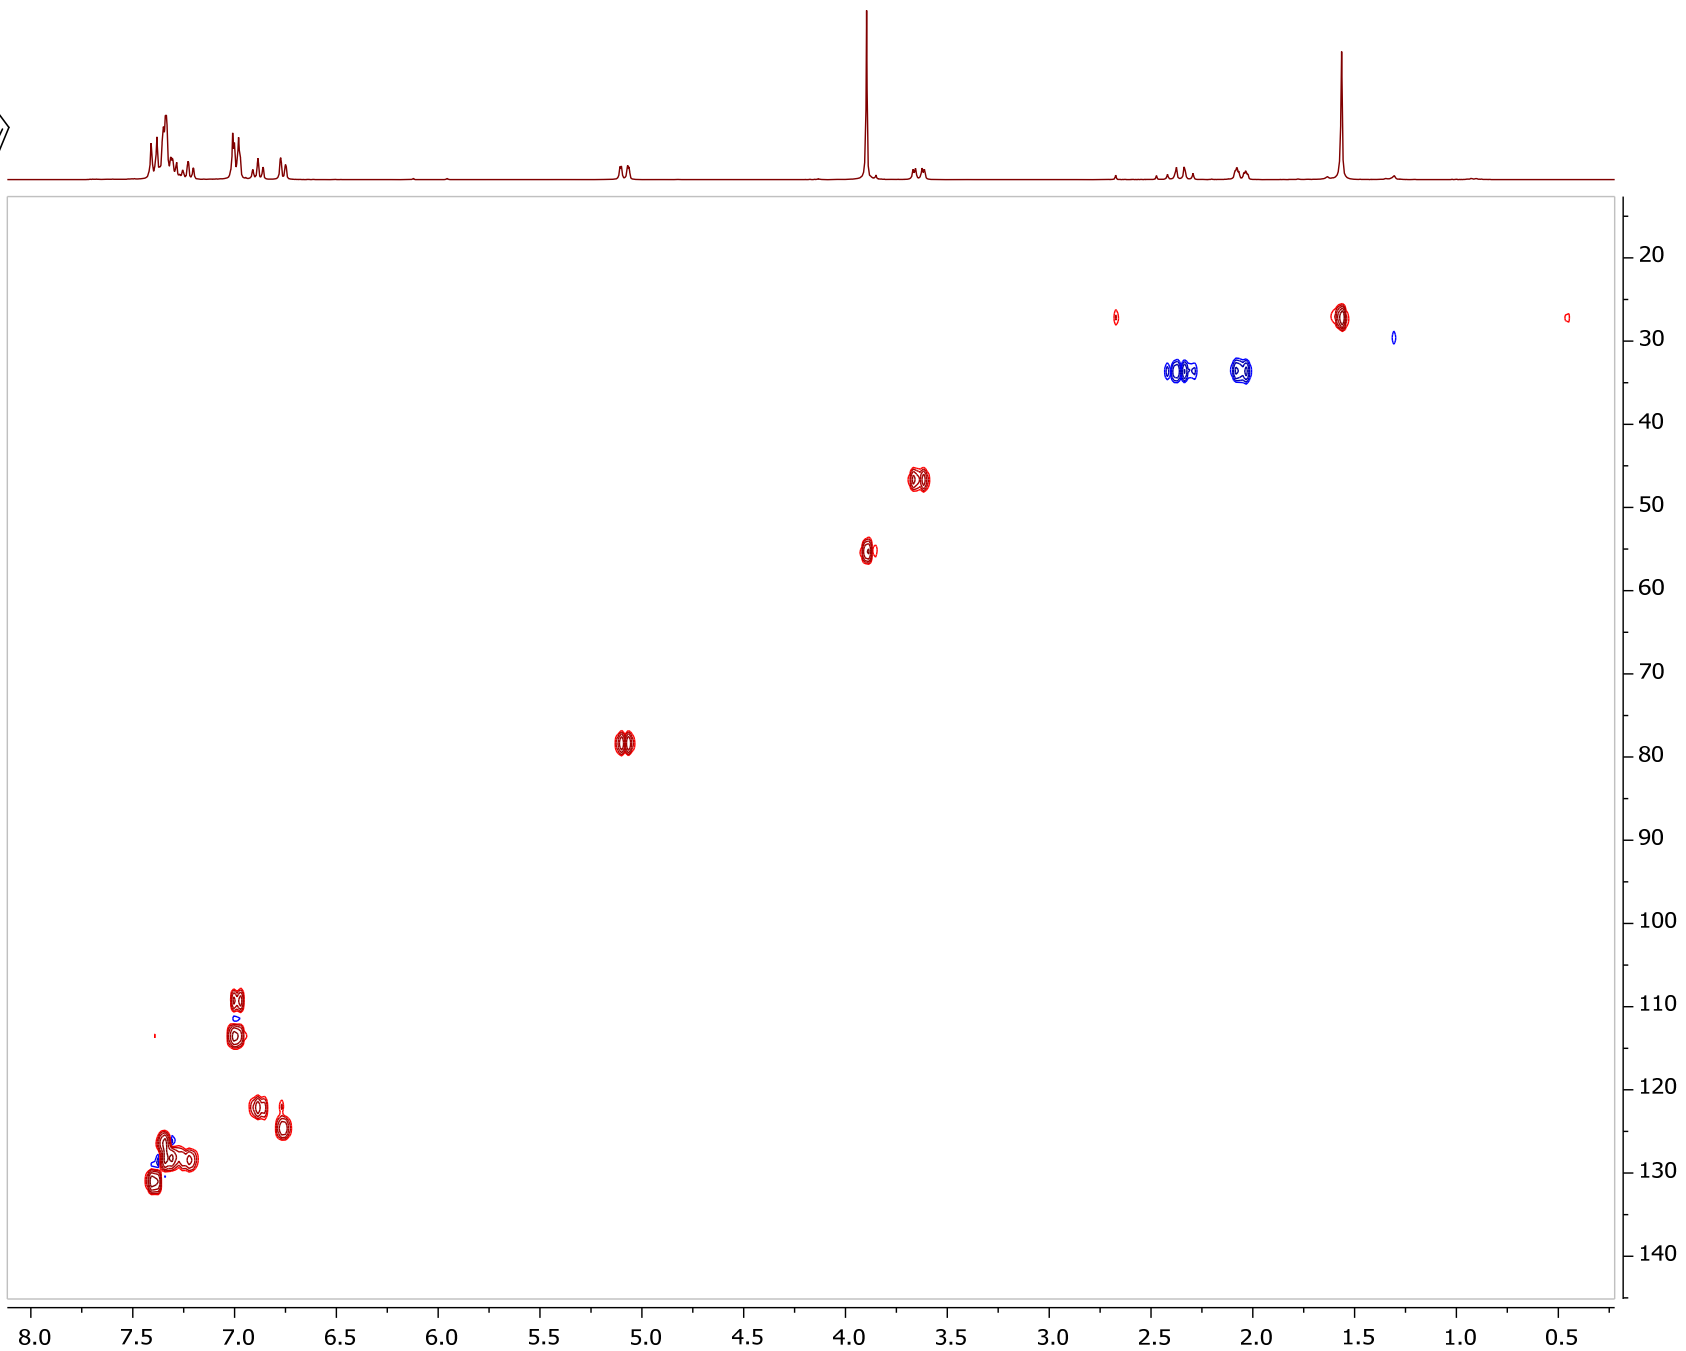

$^1\text{H}$ - $^{13}\text{C}$  HMBC

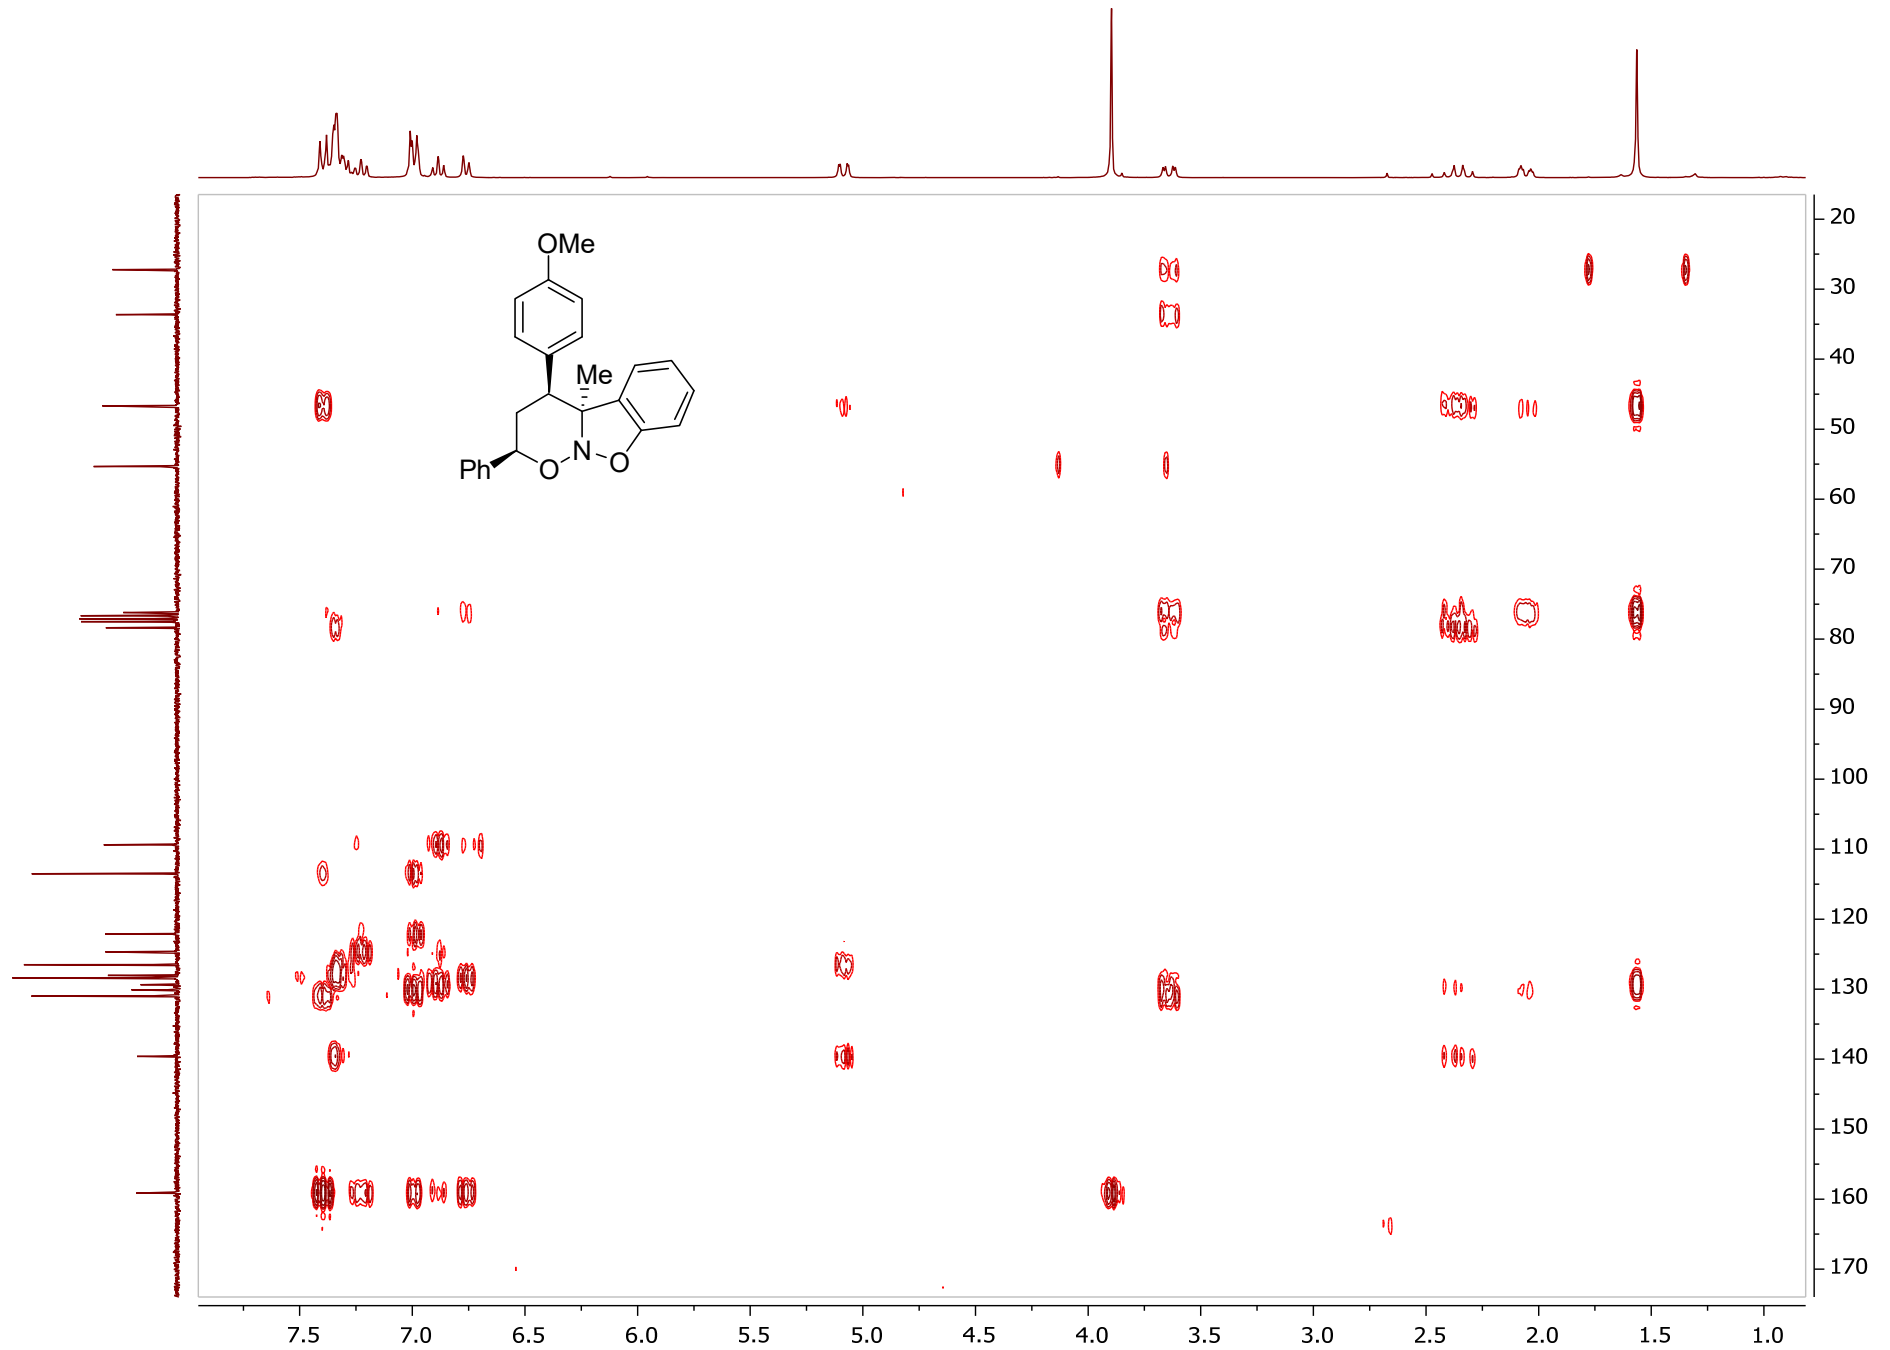

S186

$^1\text{H}$ - $^1\text{H}$  NOESY

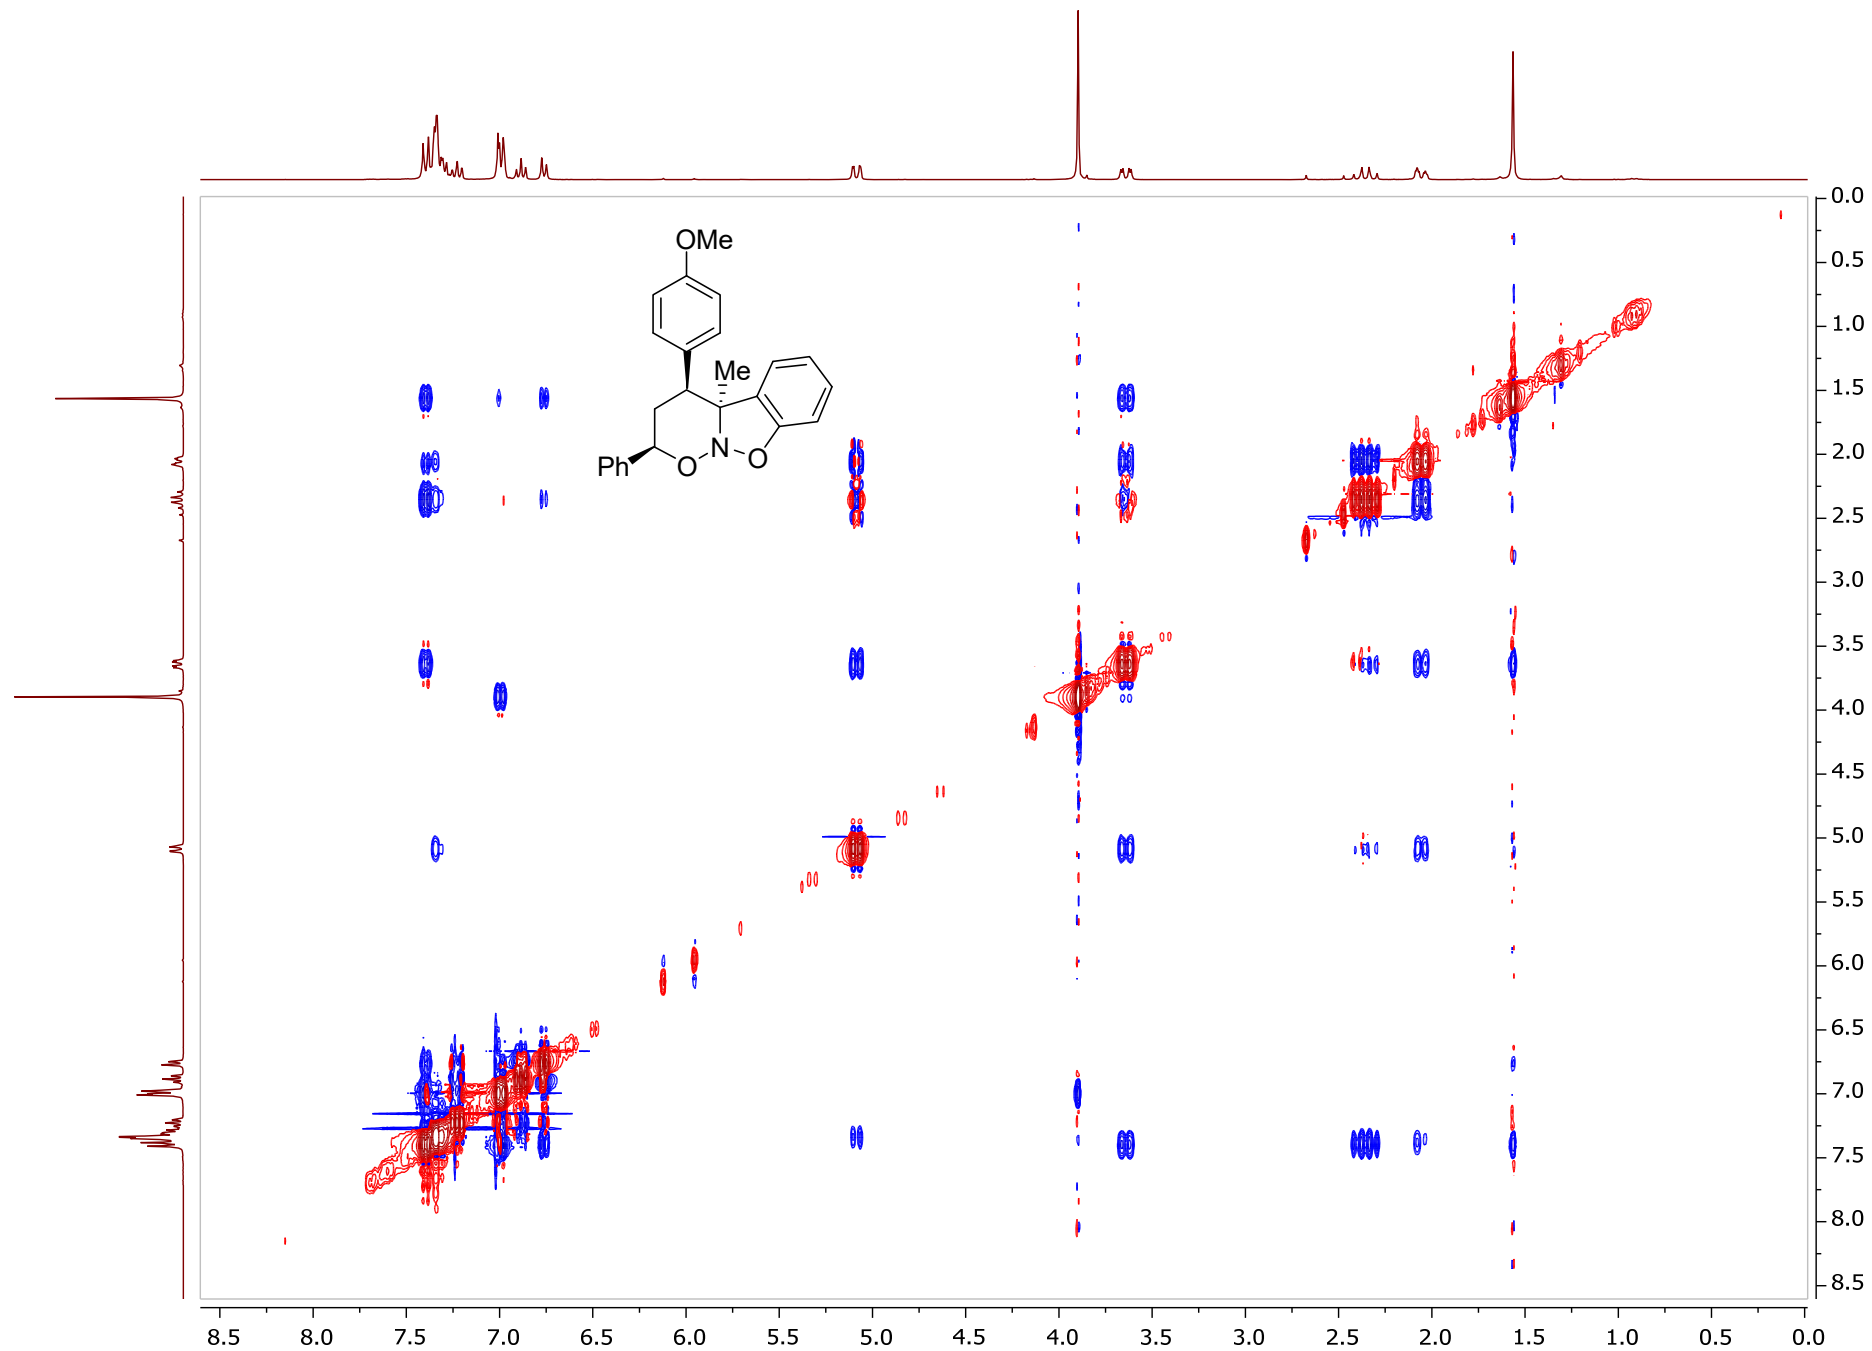

(2*S*\*,4*S*\*,4*aS*\*)-4-(4-Methoxyphenyl)-4*a*-methyl-2-phenyl-2,3,4,4*a*-tetrahydrobenzo[4,5]isoxazolo[2,3-*b*][1,2]oxazine 5*ka*, major / minor = 2.2:1

<sup>1</sup>H NMR (300 MHz, CDCl<sub>3</sub>)

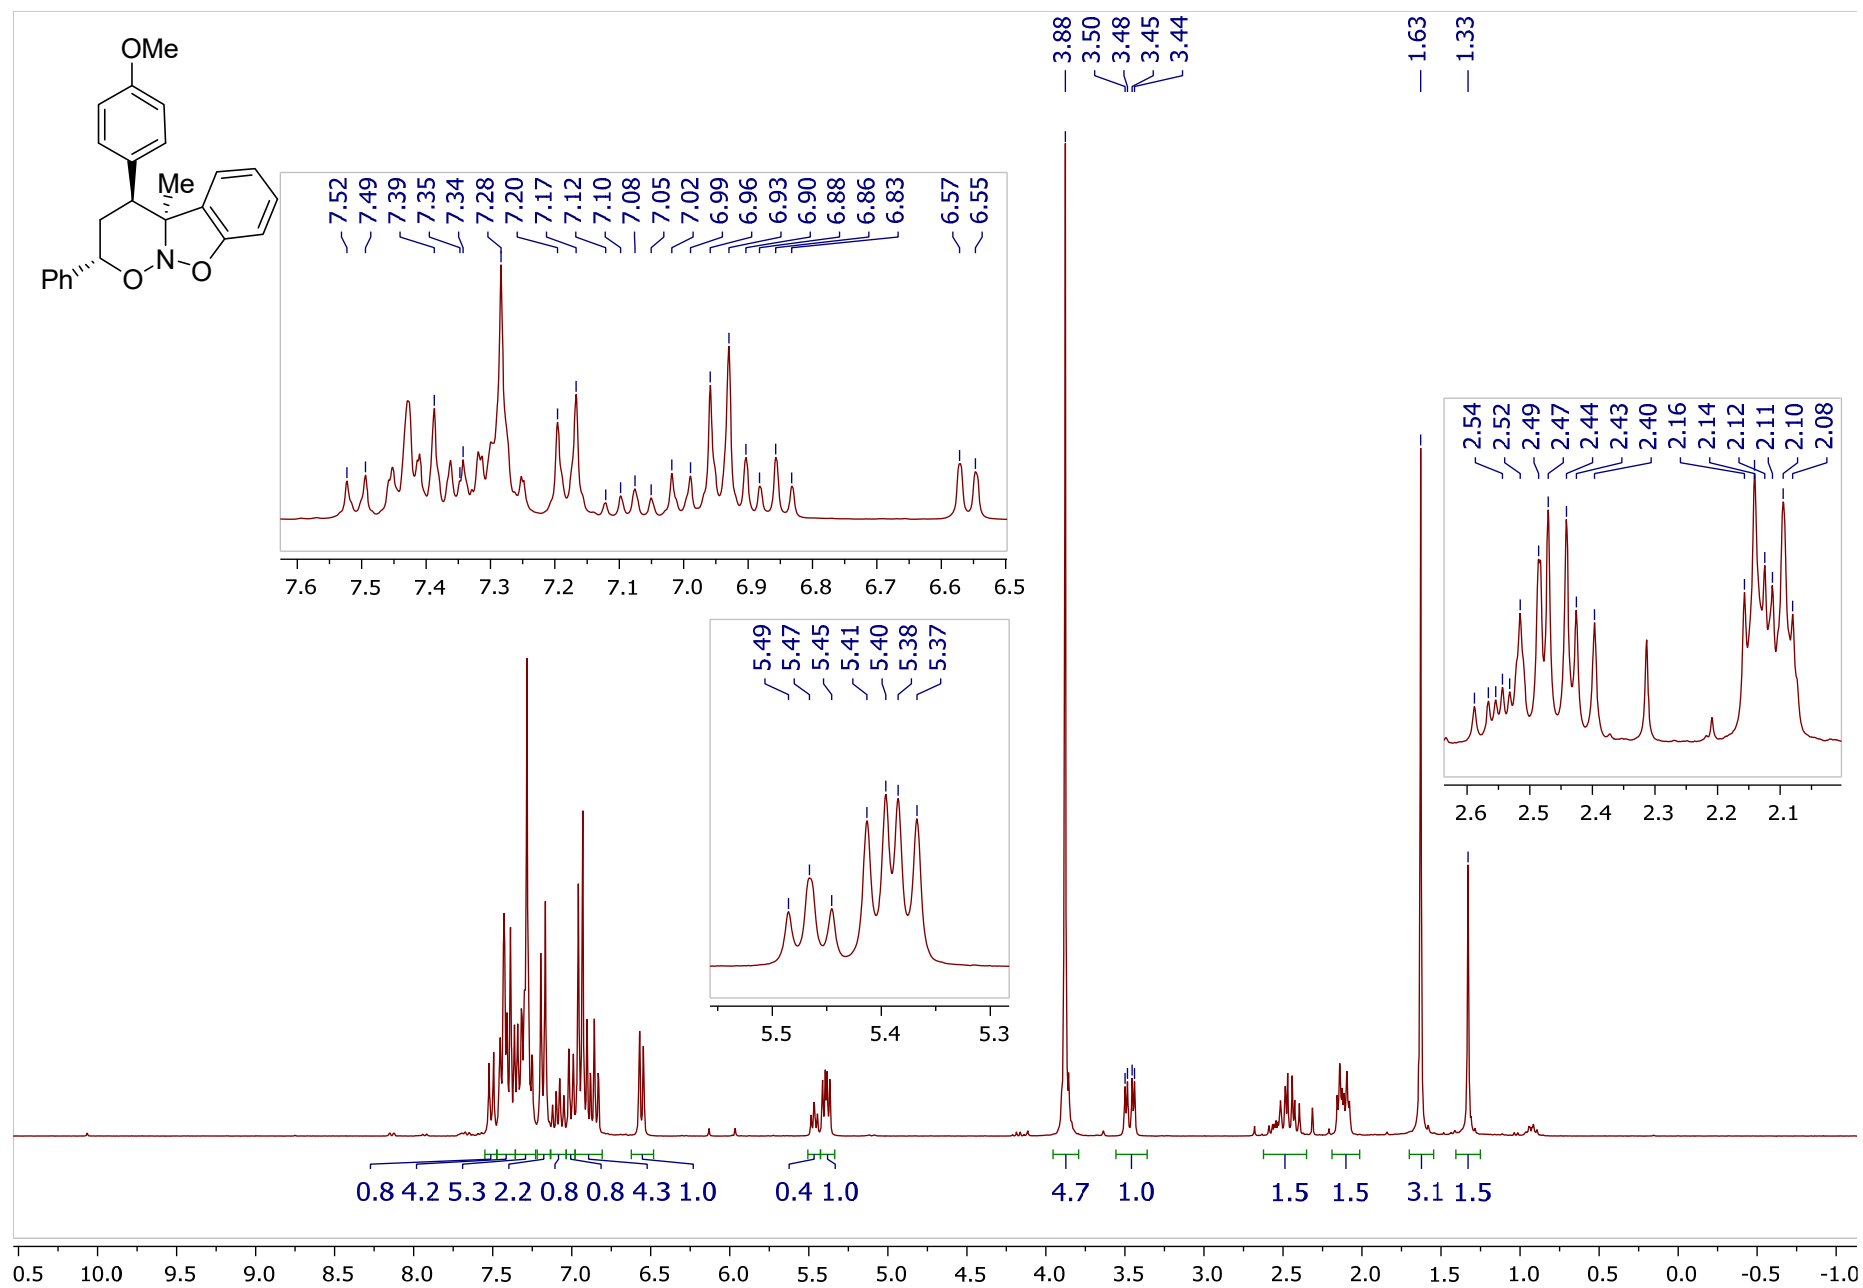

<sup>13</sup>C NMR (75 MHz, CDCl<sub>3</sub>)

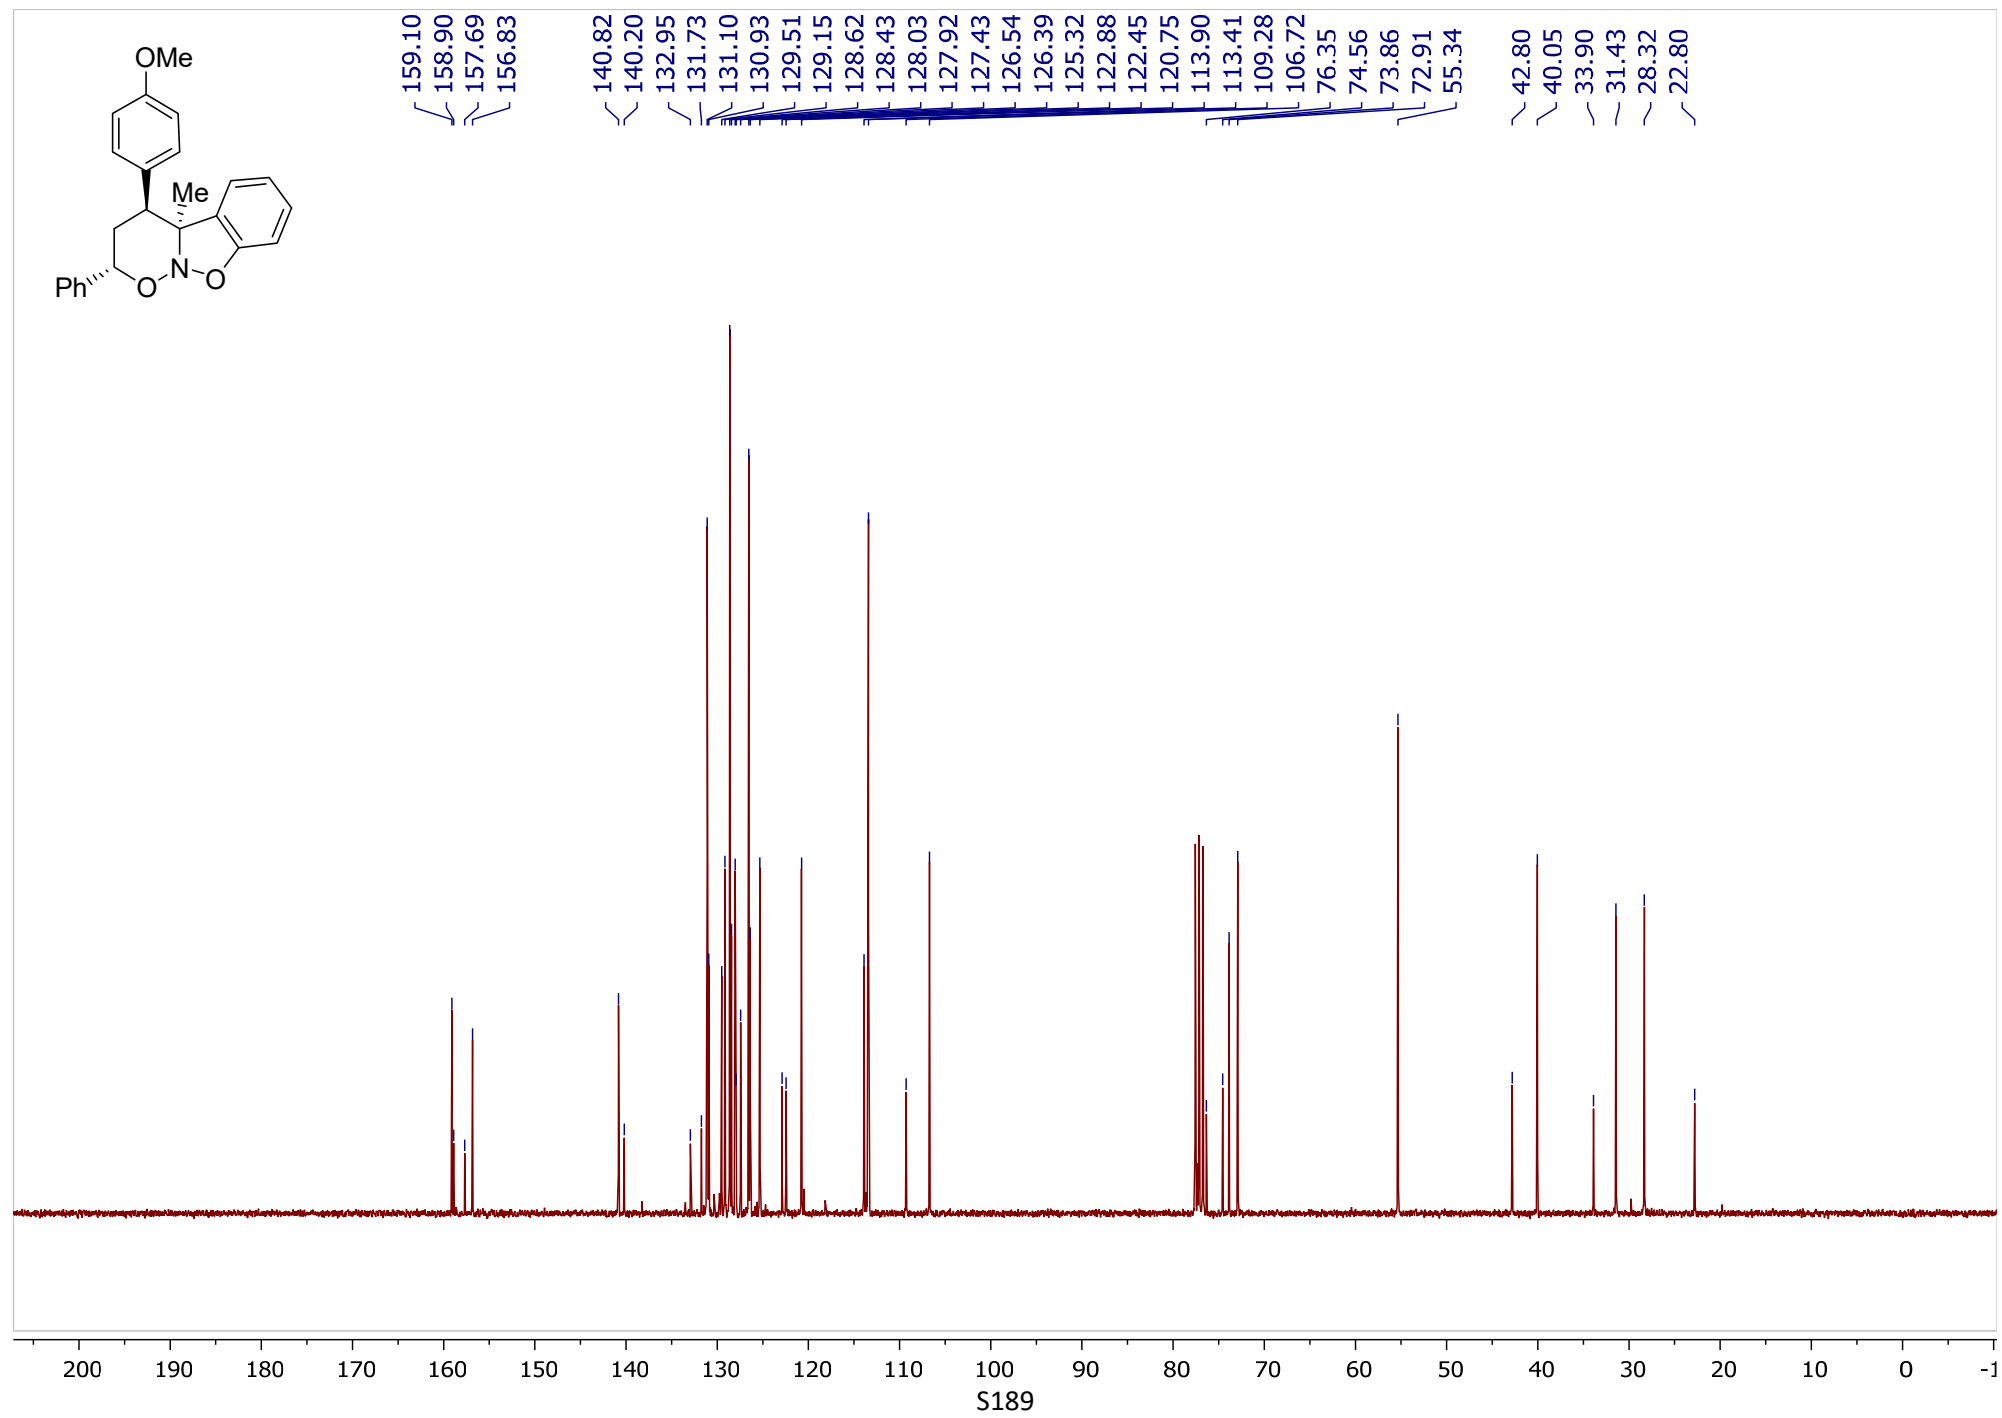

<sup>13</sup>C DEPT 135 (75 MHz, CDCl<sub>3</sub>)

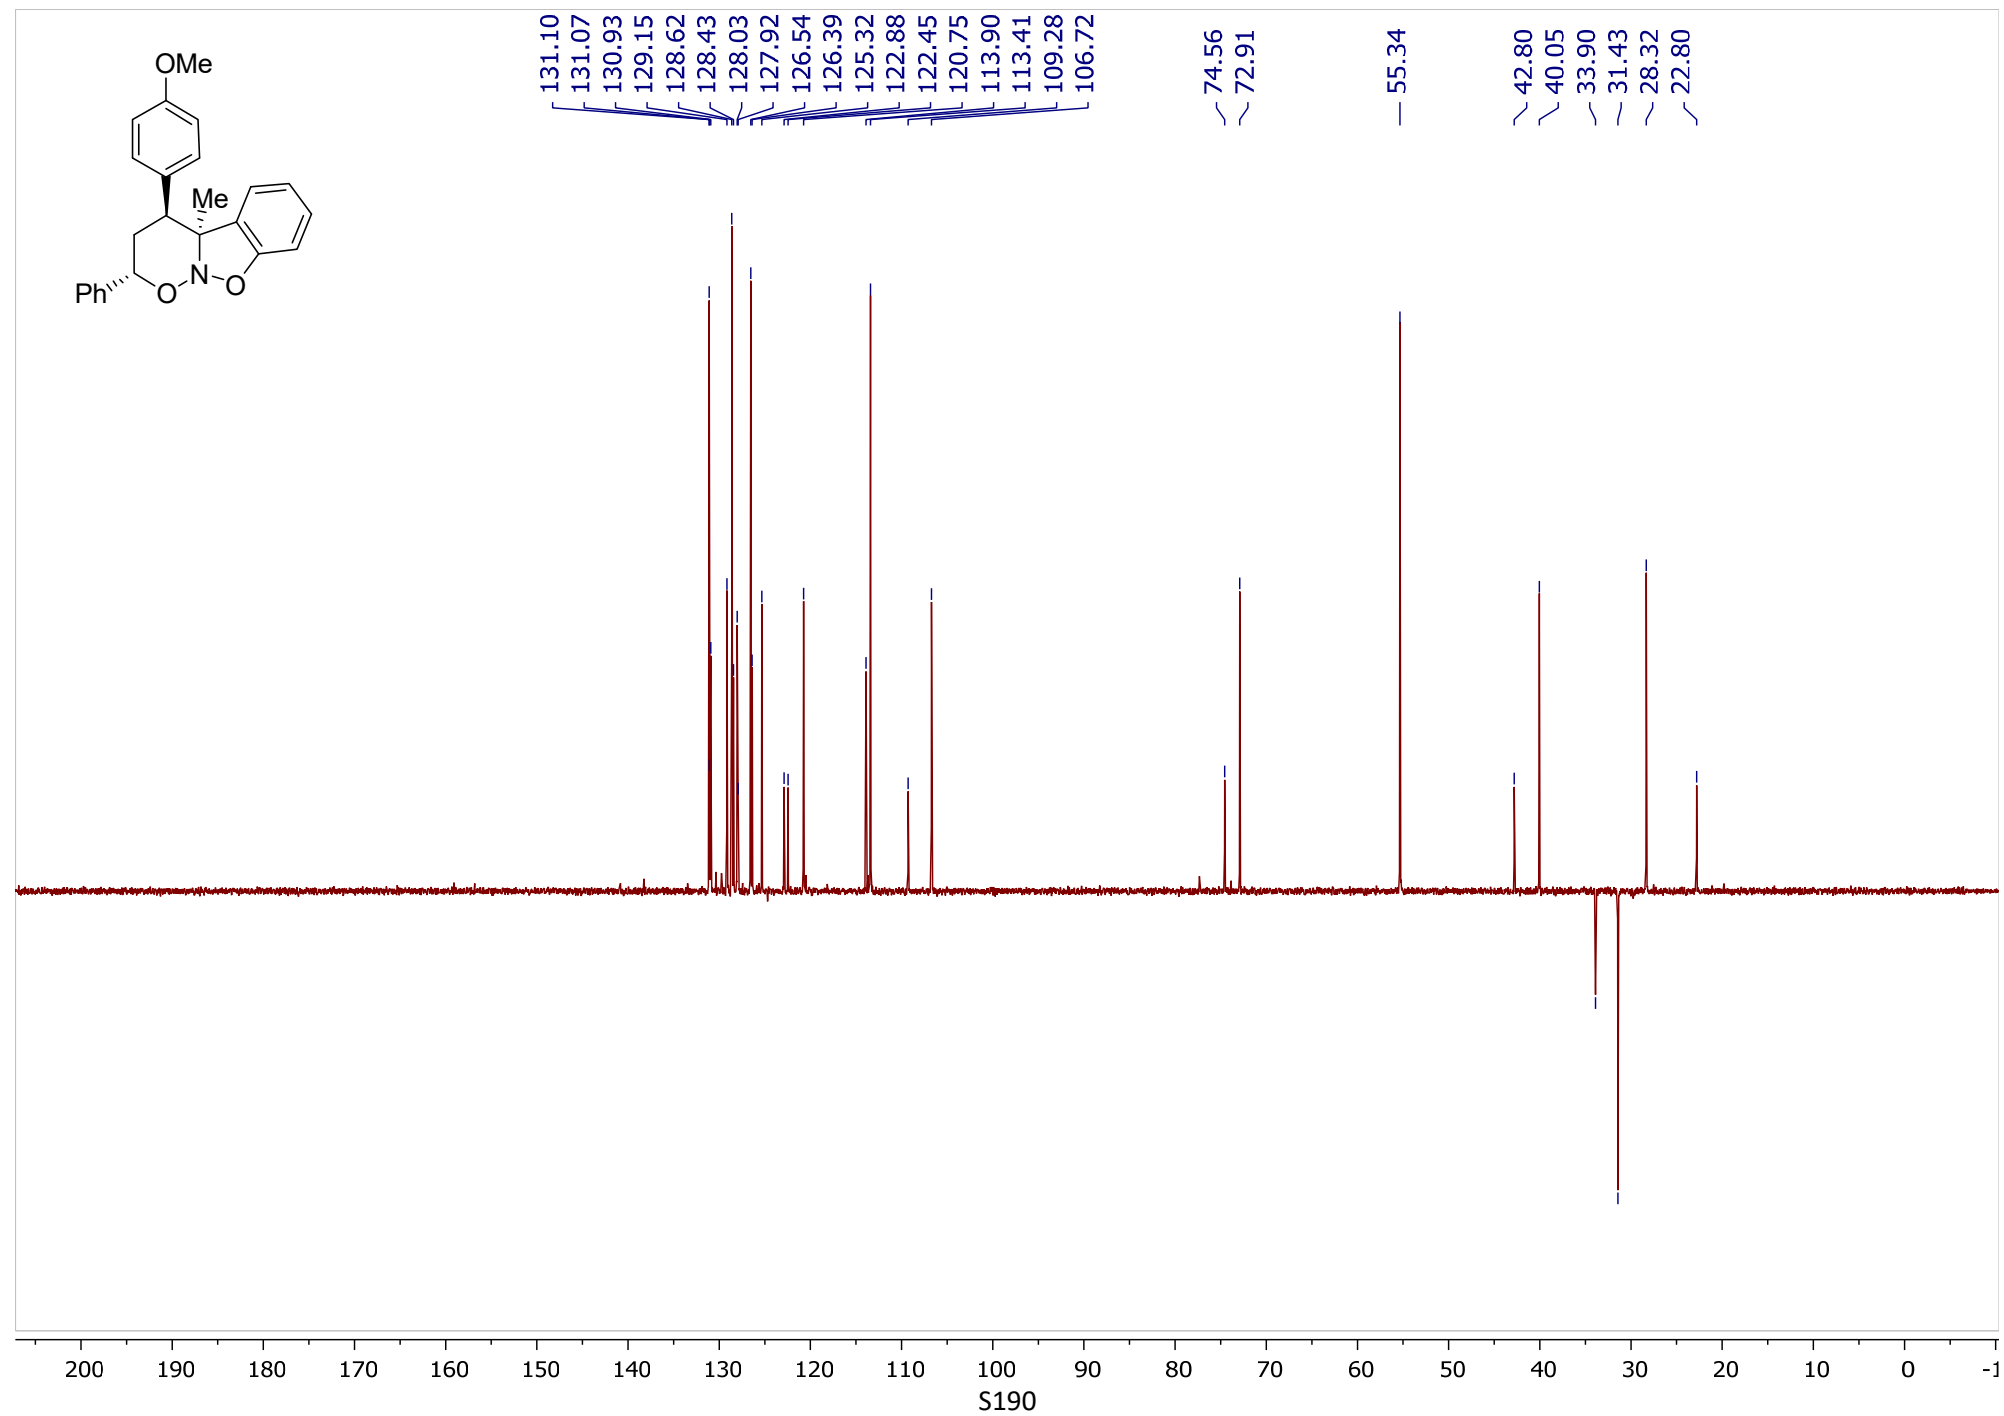

$^1\text{H}$ - $^1\text{H}$  COSY

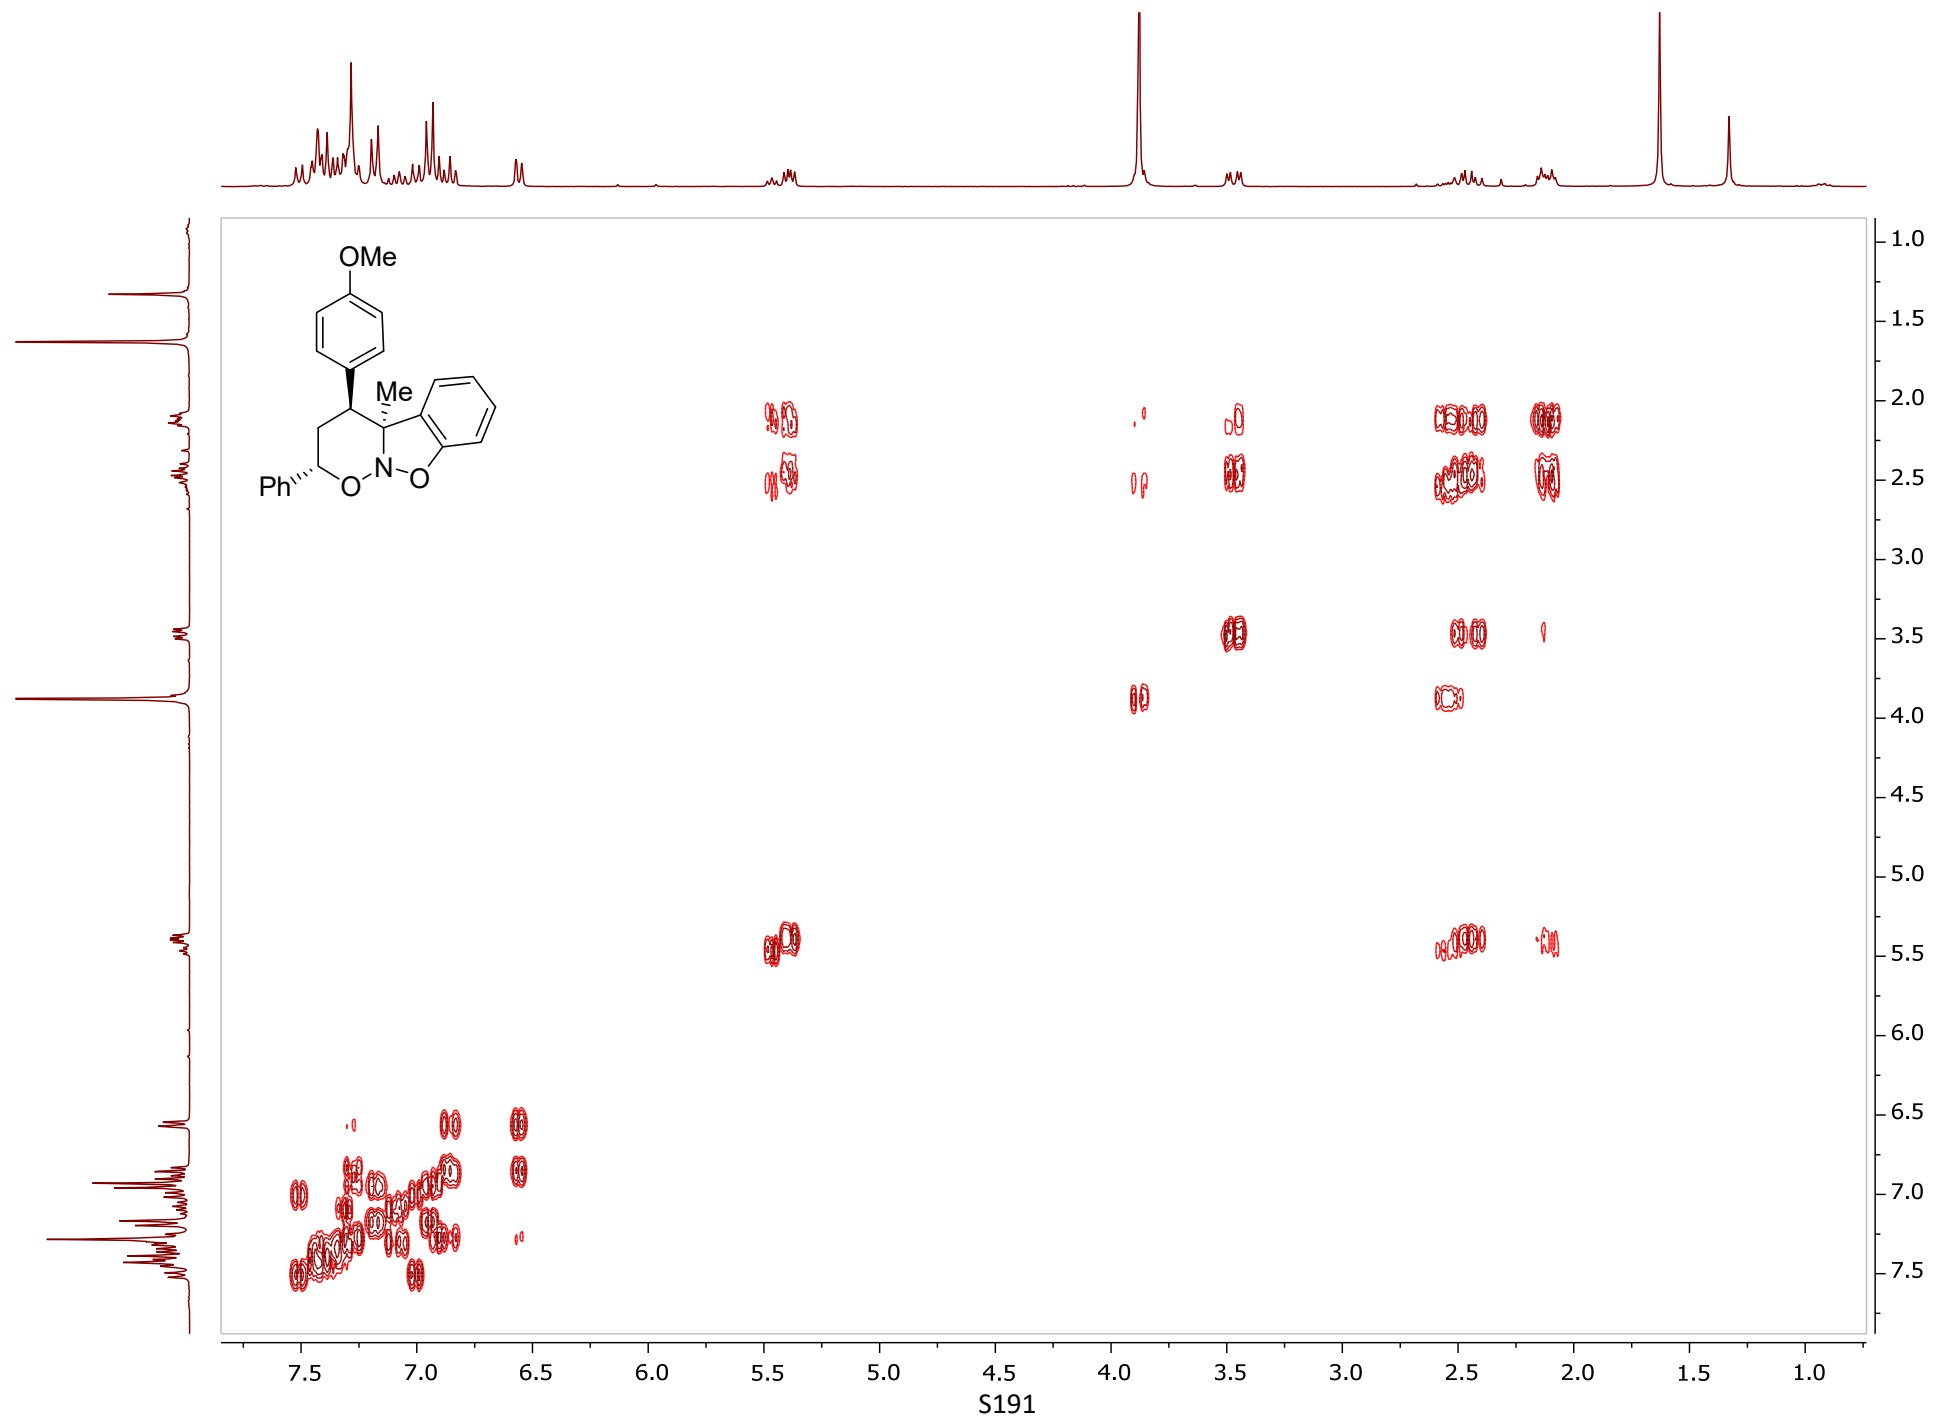

$^1\text{H}$ - $^{13}\text{C}$  HSQC

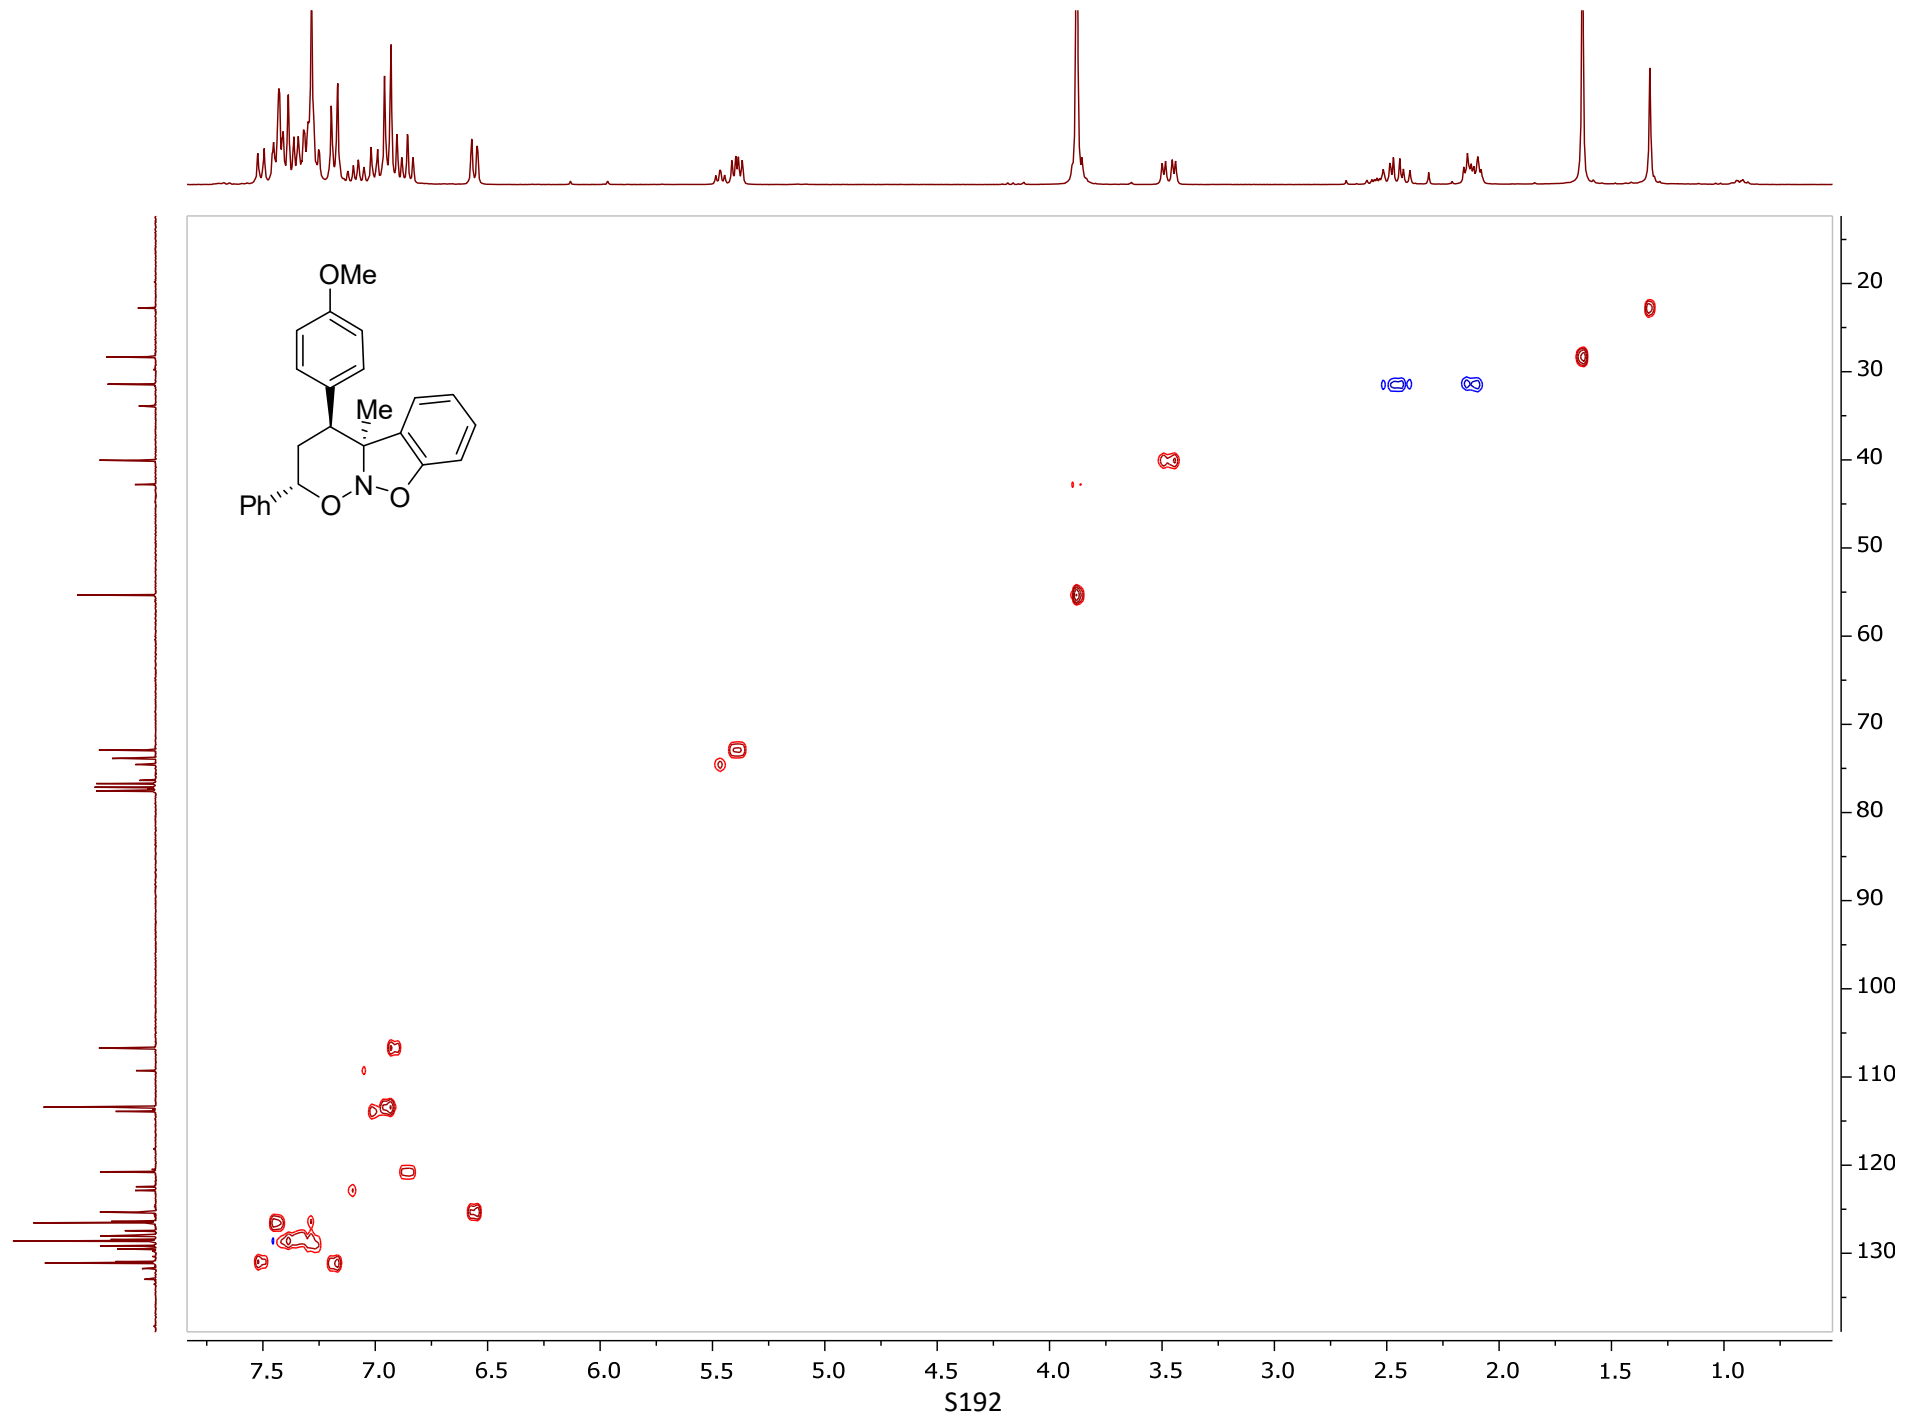



$^1\text{H}$ - $^{13}\text{C}$  HMBC

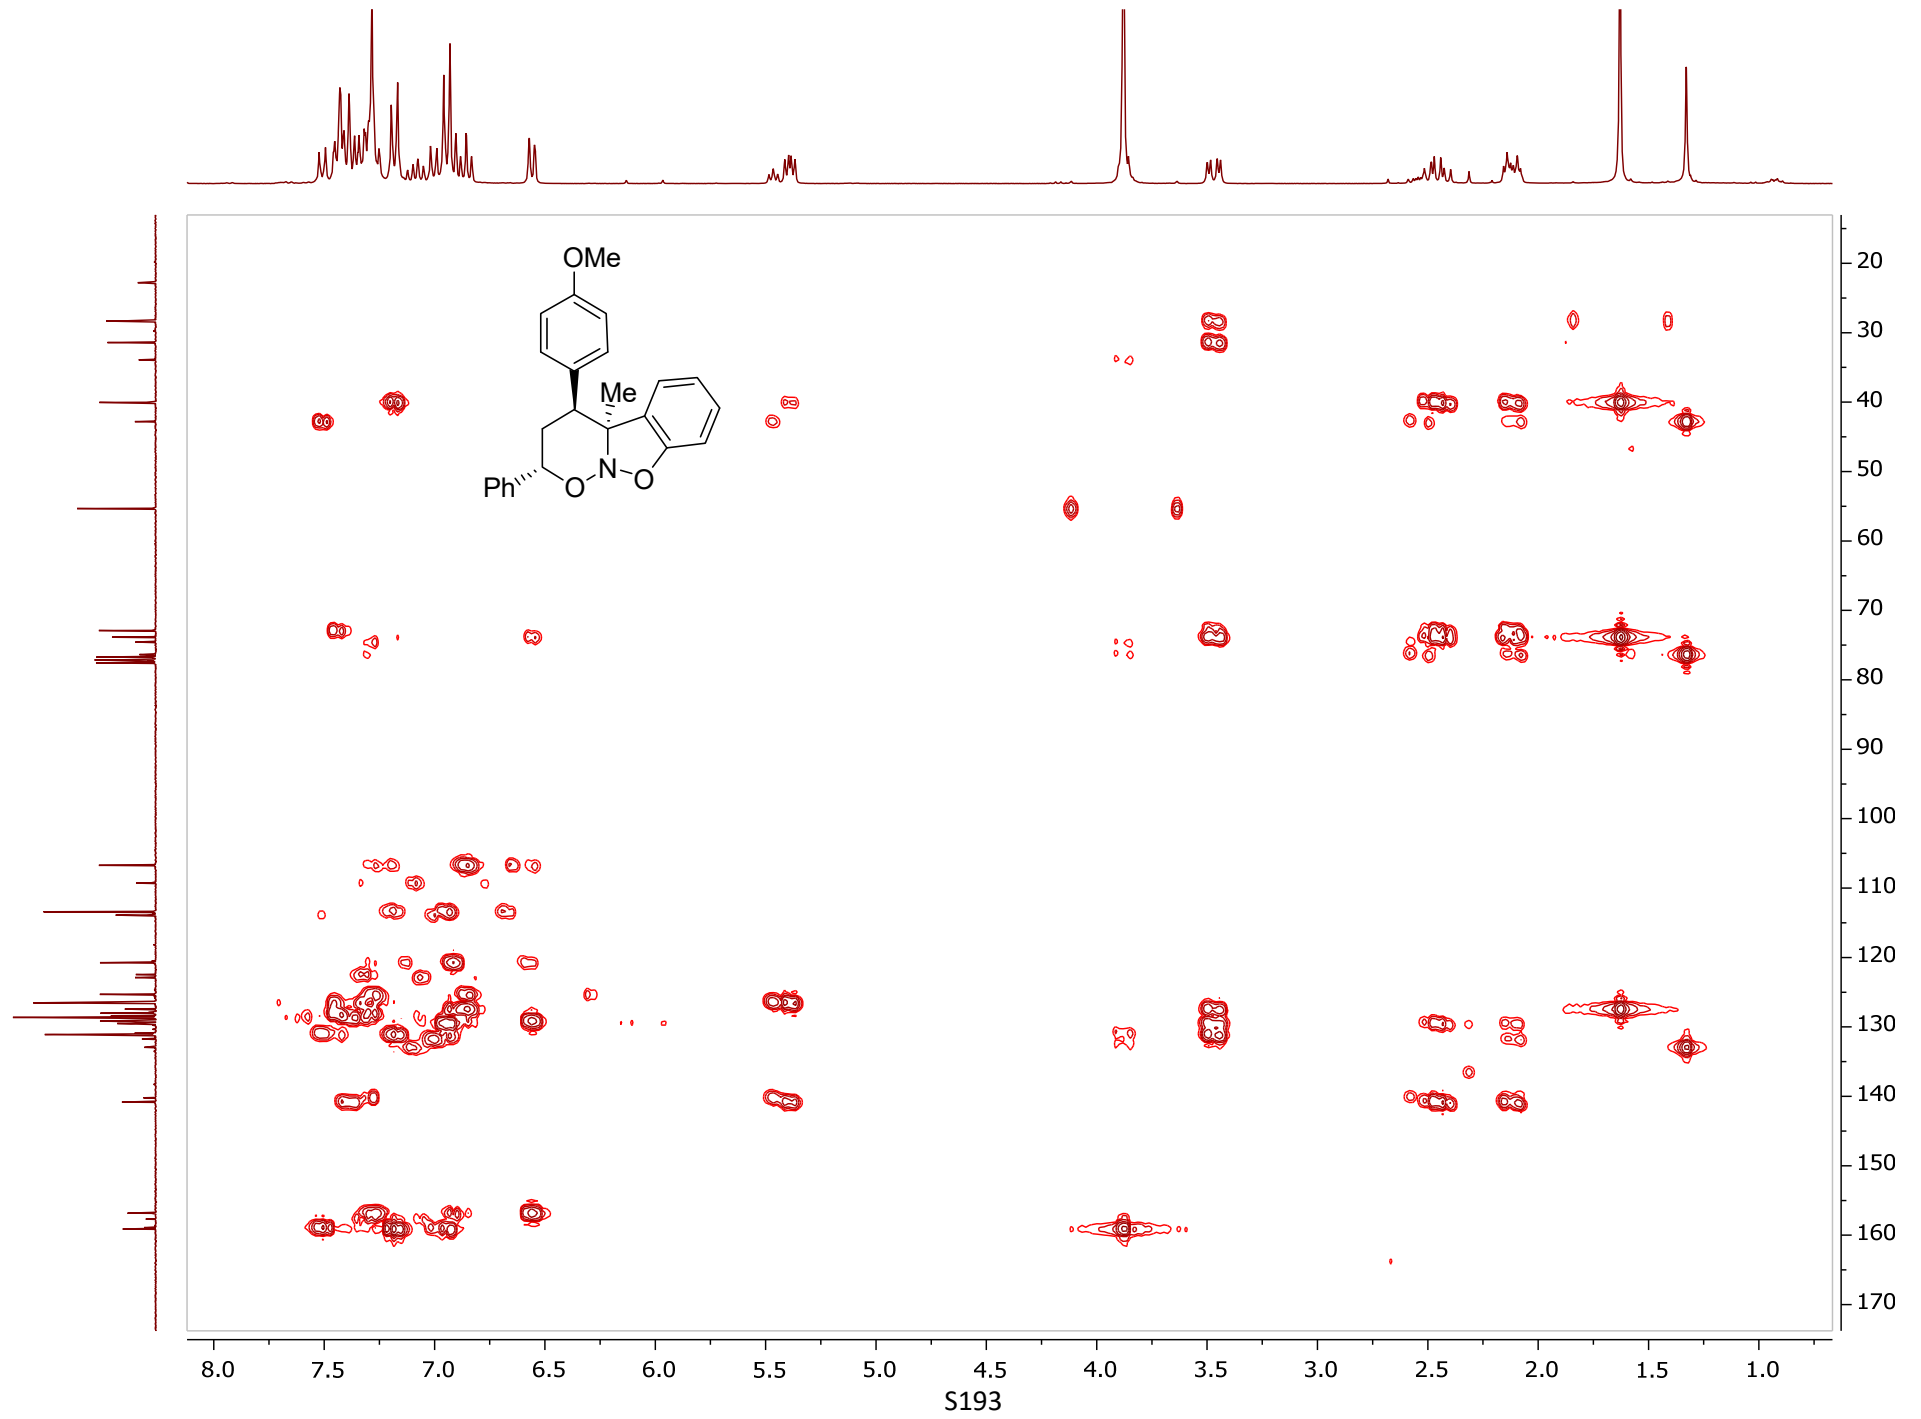

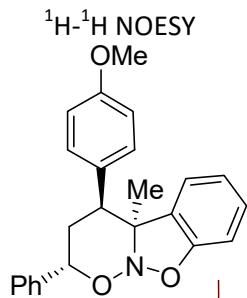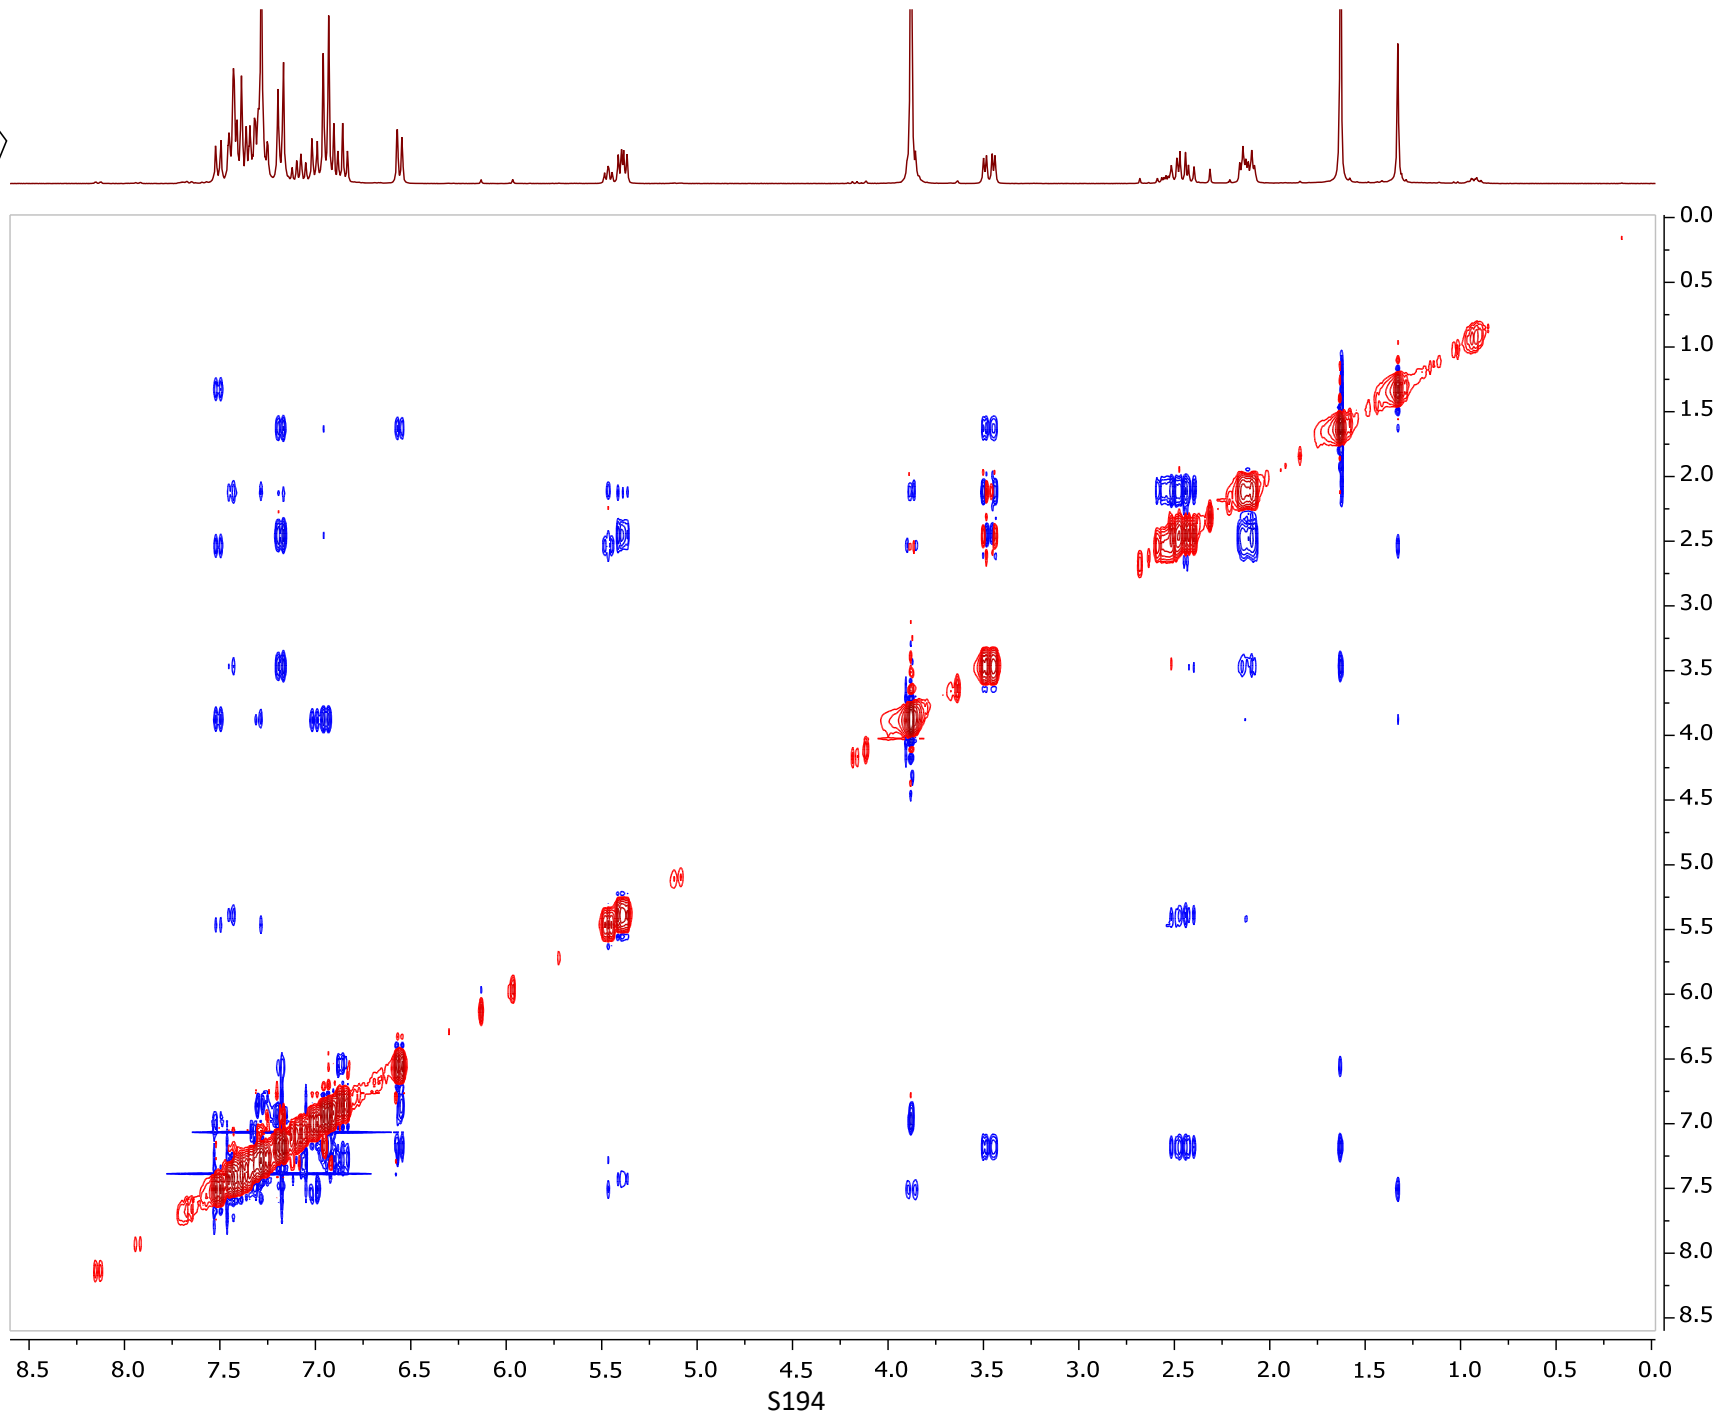

(4aR\*,11bS\*,12S\*,12aR\*)-12-(4-Methoxyphenyl)-11b-methyl-1,2,3,4,4a,11b,12,12a-octahydrobenzo[e]benzo[4,5]isoxazolo[2,3-b][1,2]oxazine 5la

<sup>1</sup>H NMR (300 MHz, CDCl<sub>3</sub>)

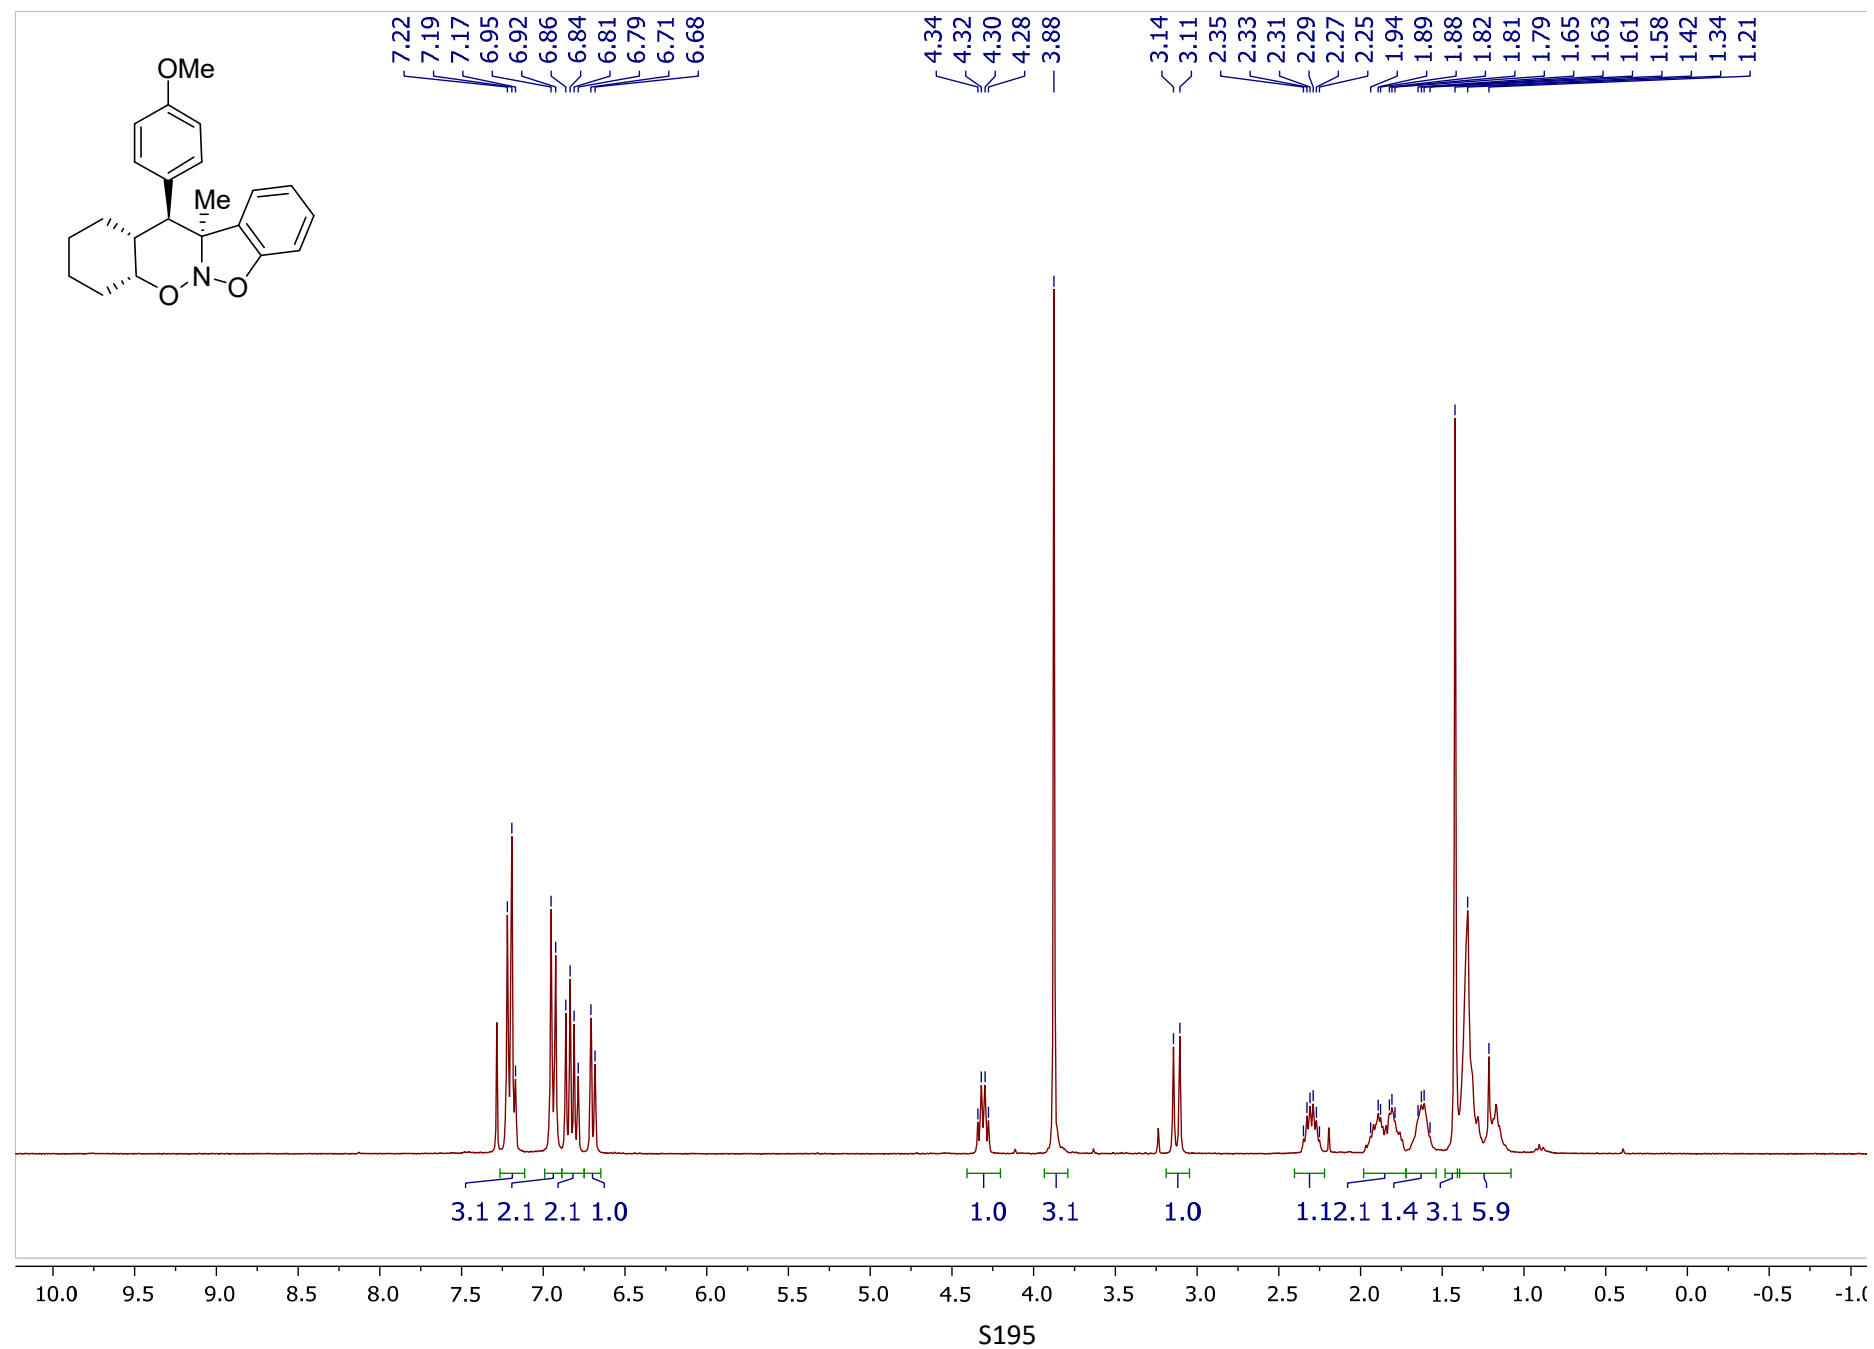

$^{13}\text{C}$  NMR (75 MHz,  $\text{CDCl}_3$ )

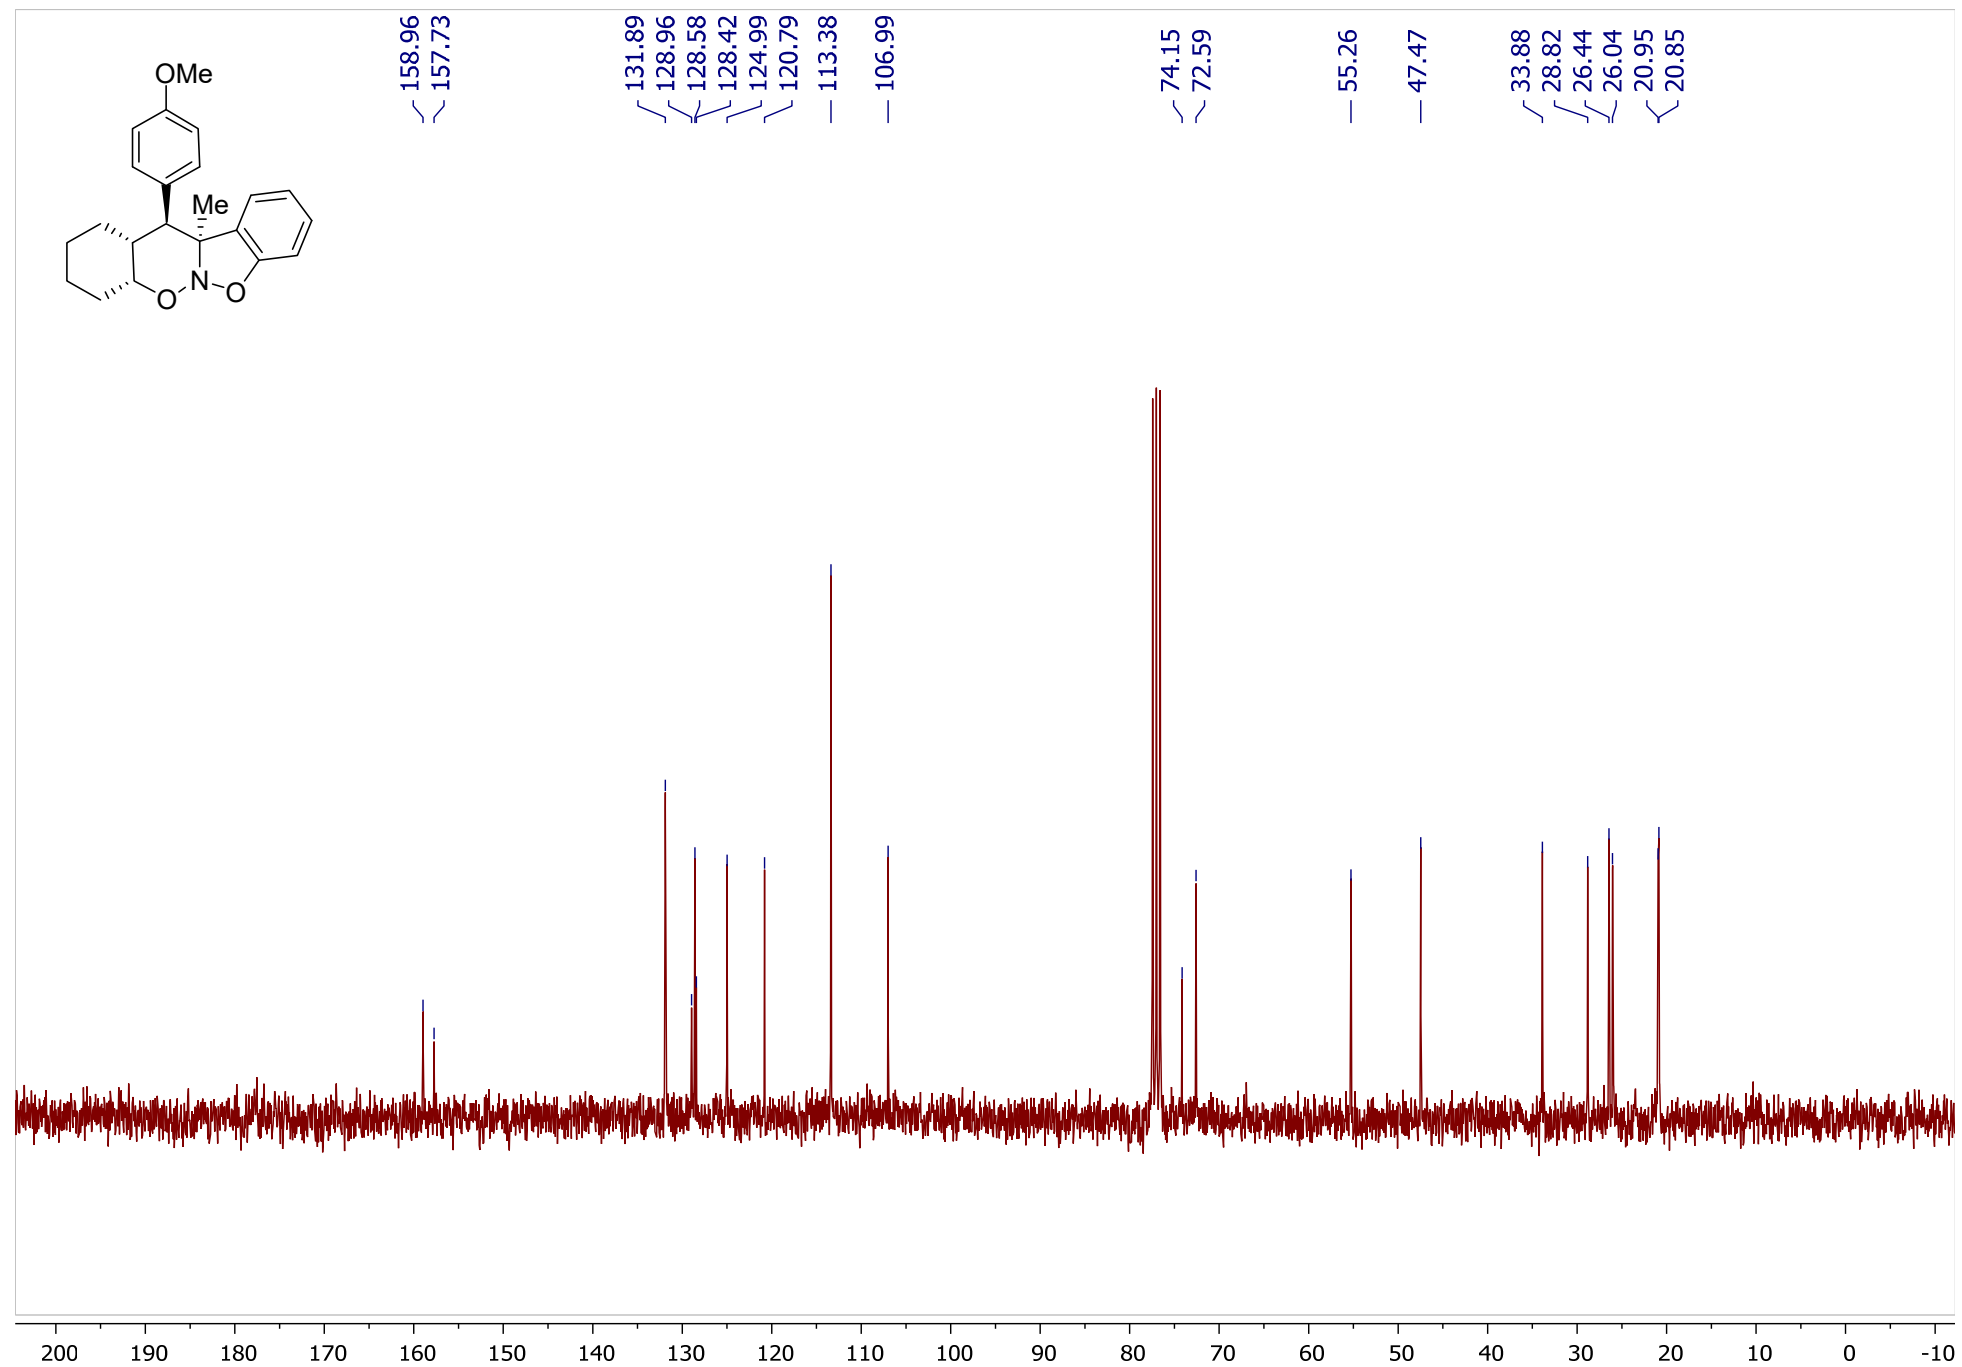

$^{13}\text{C}$  DEPT 135 (75 MHz,  $\text{CDCl}_3$ )

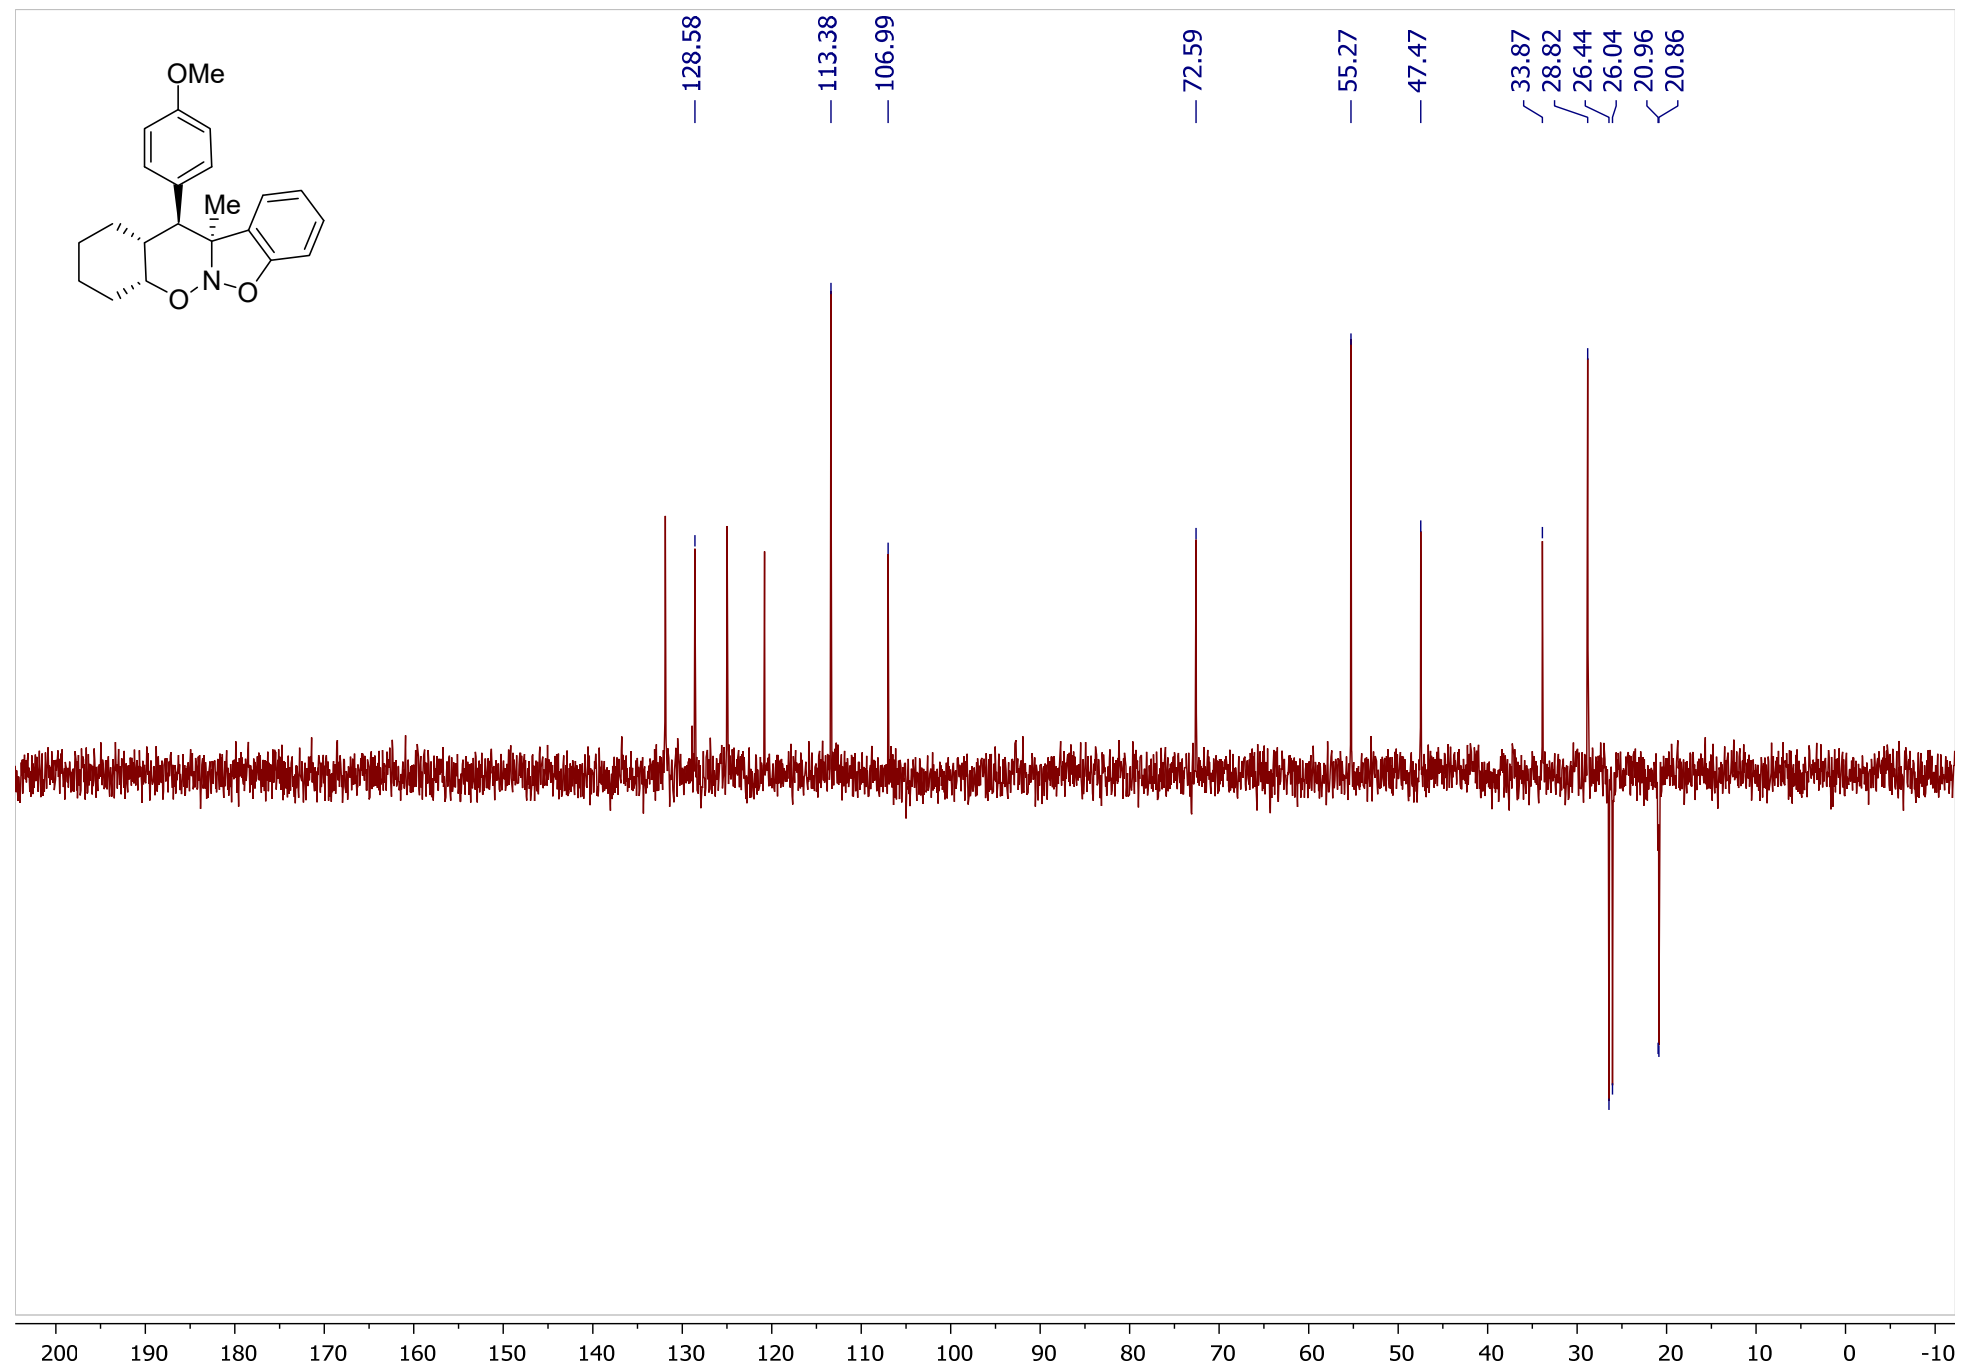

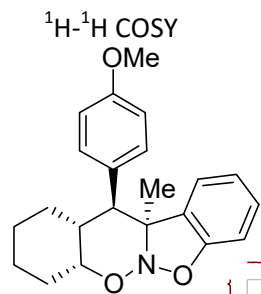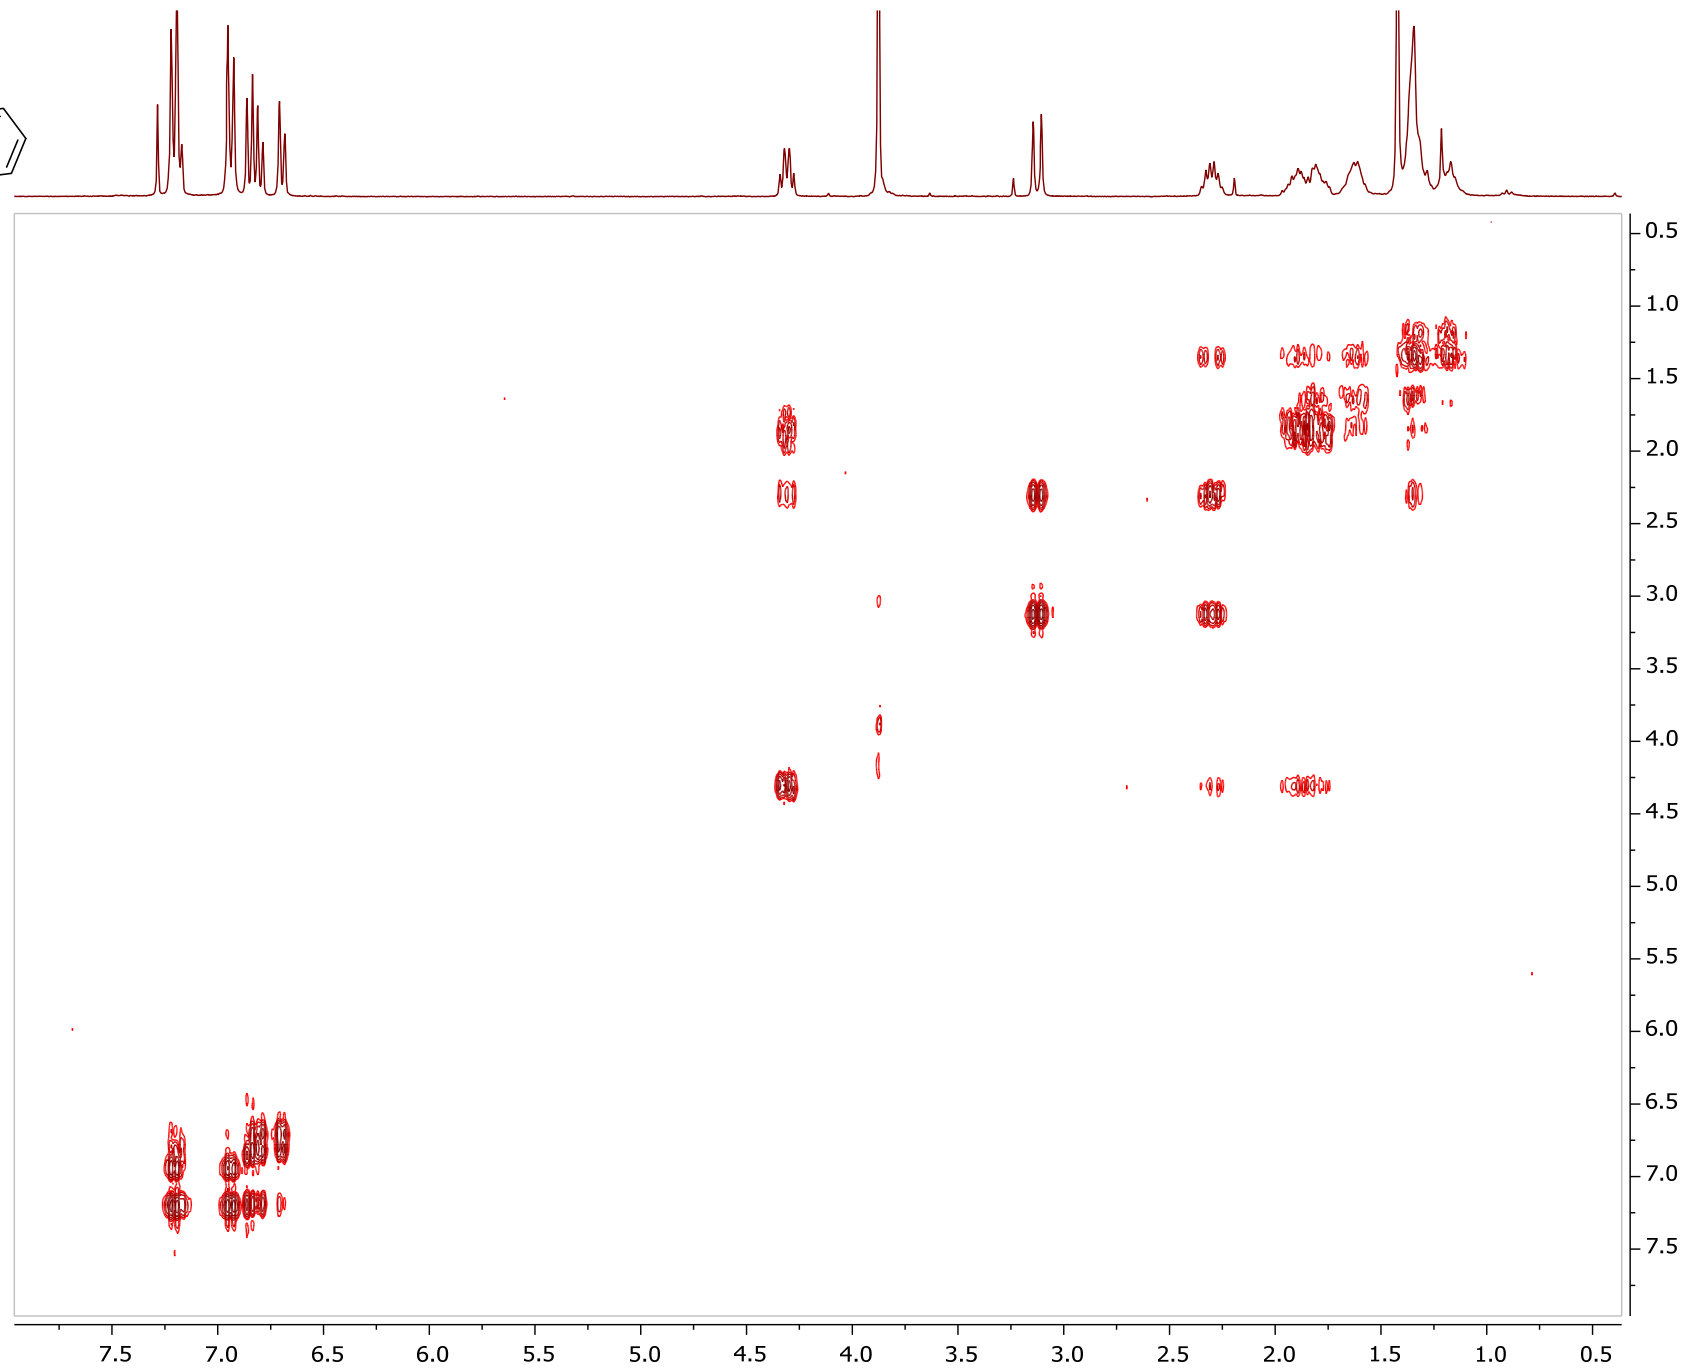

$^1\text{H}$ - $^{13}\text{C}$  HSQC

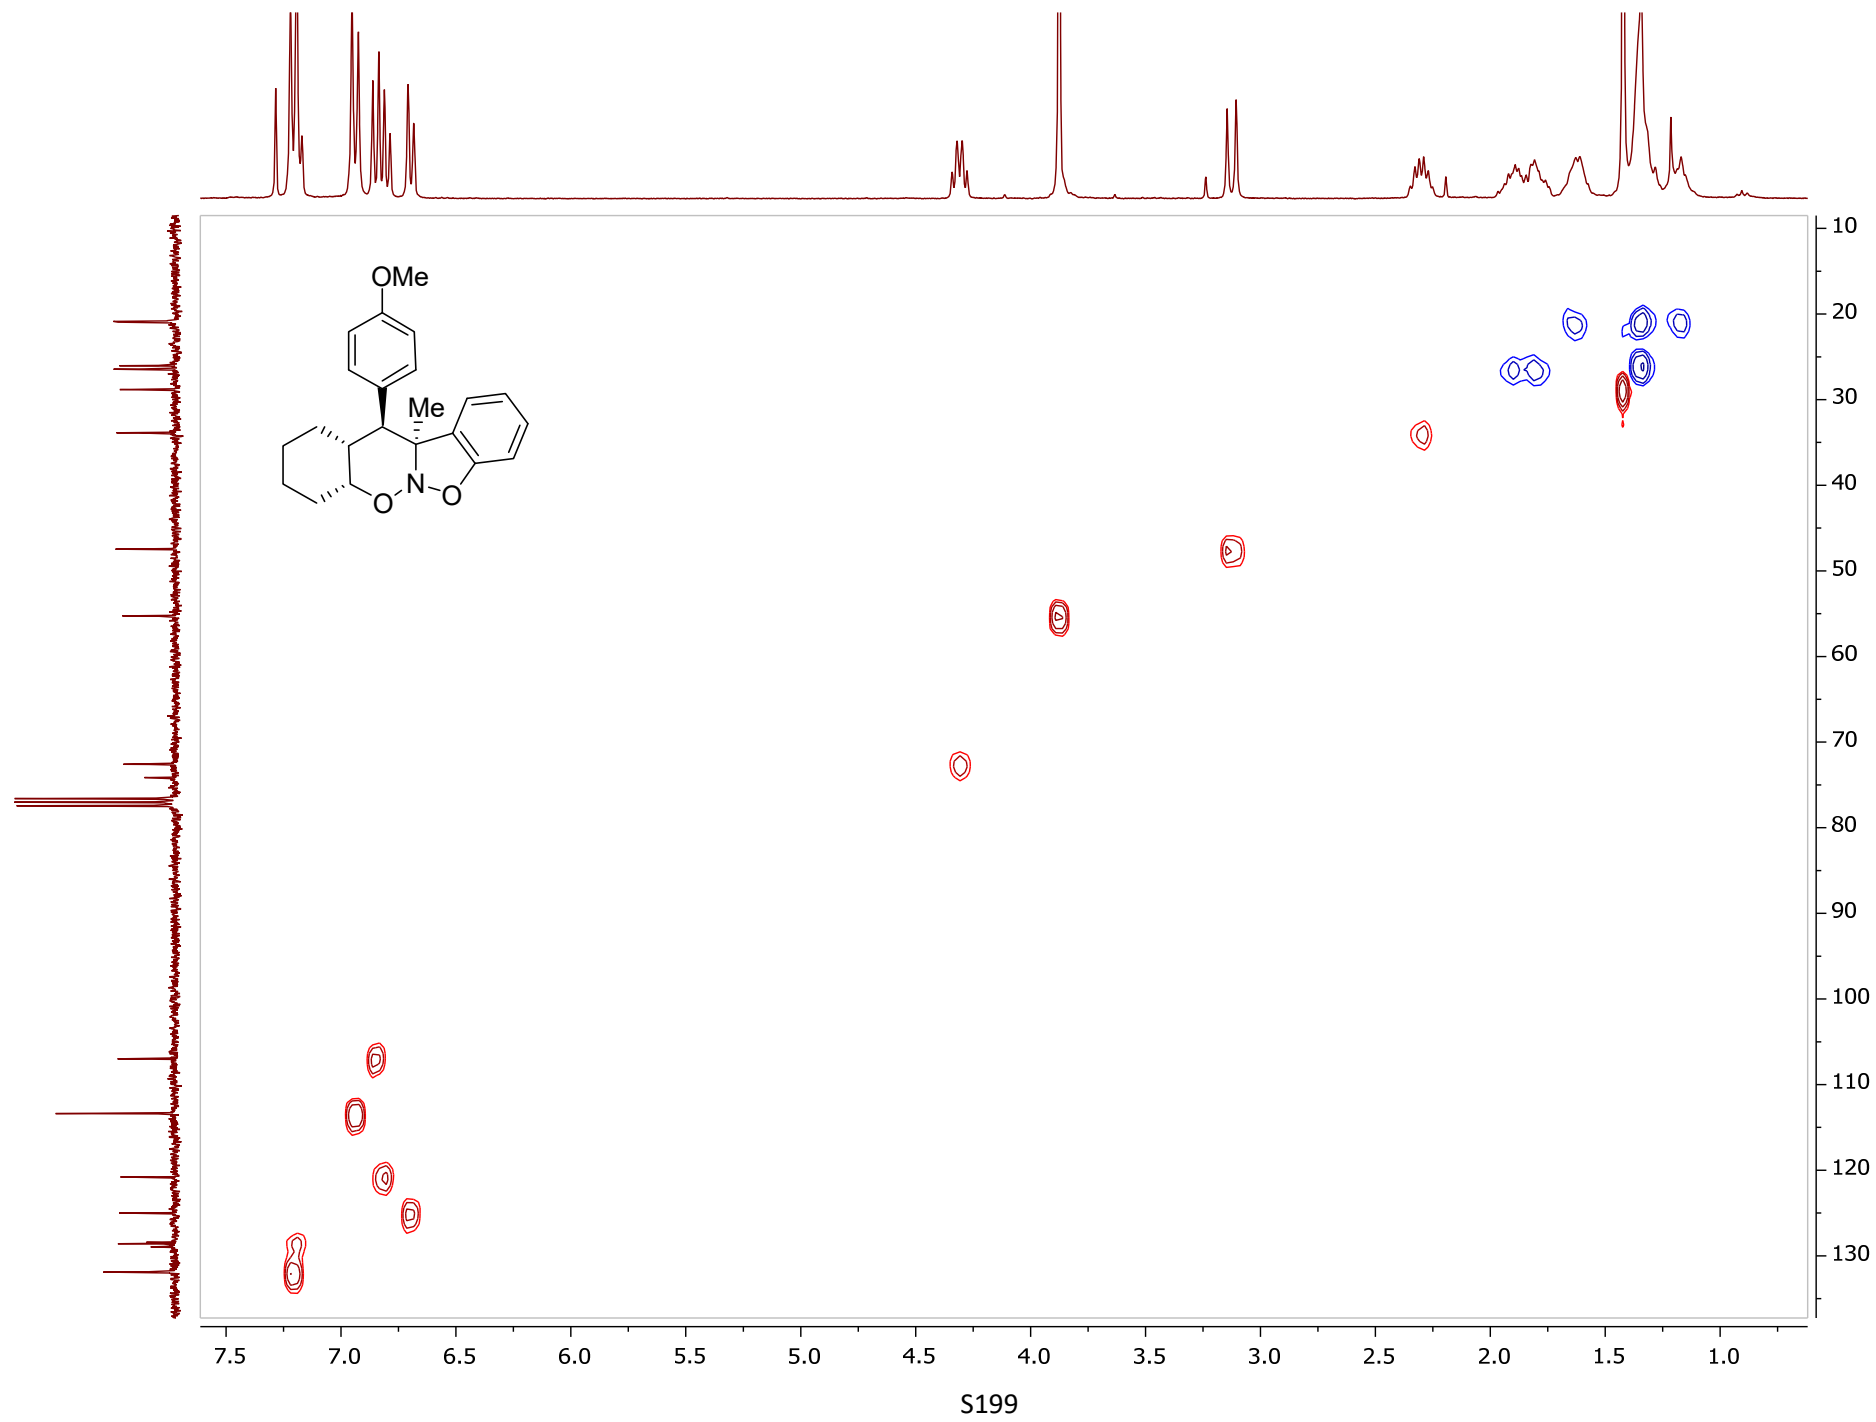

$^1\text{H}$ - $^1\text{H}$  NOESY

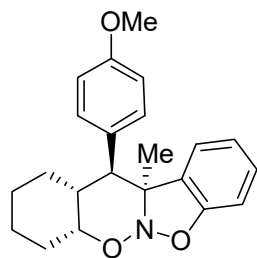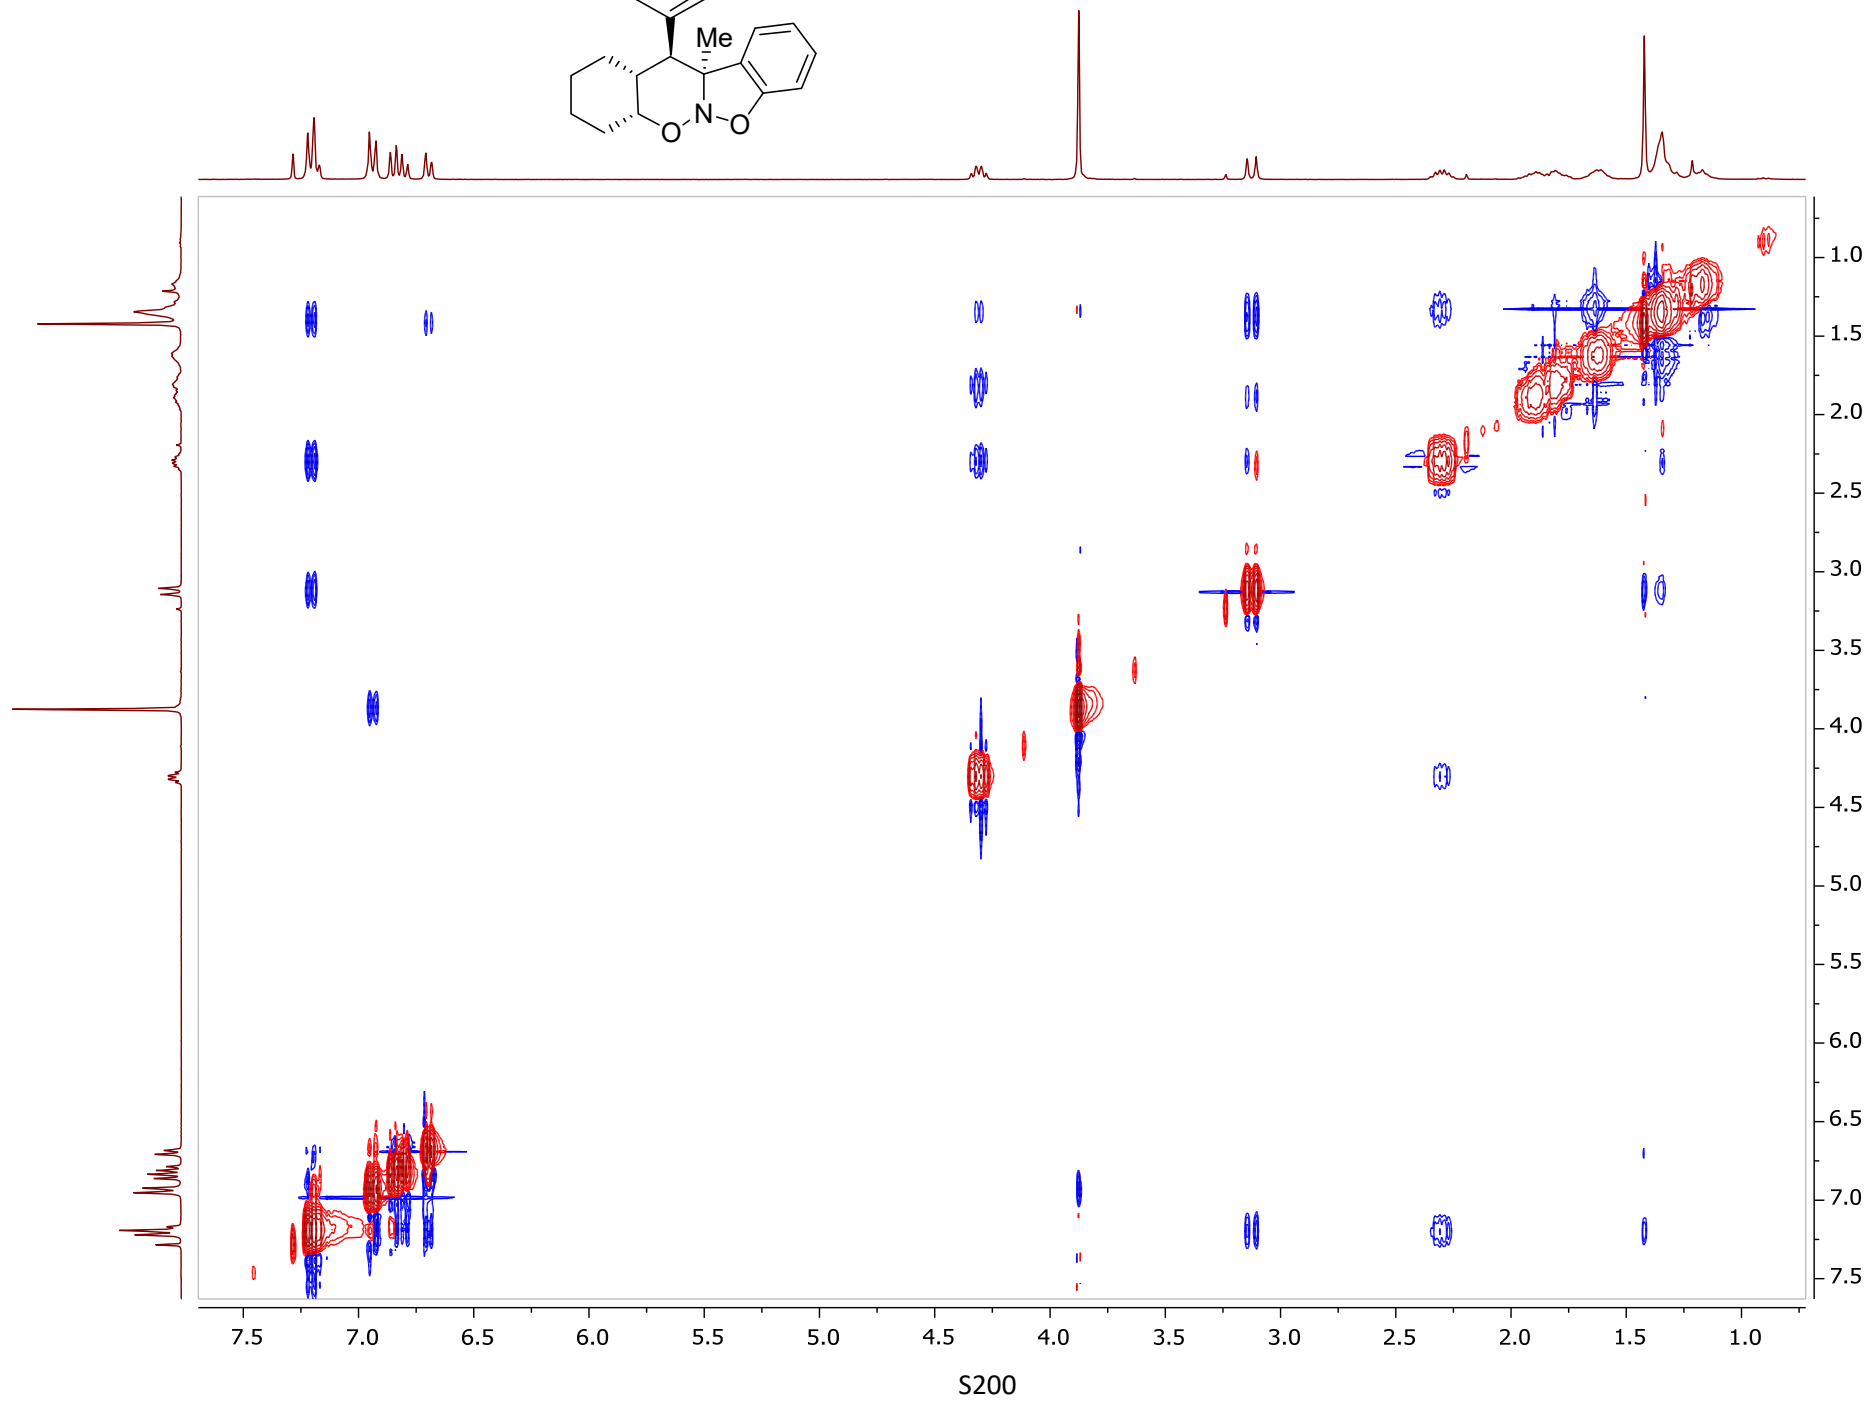



**(3aR\*,10bS\*,11S\*,11aR\*)-10b-Methyl-11-phenyl-2,3,3a,10b,11,11a-hexahydro-1H-benzo[4,5]isoxazolo[2,3-b]cyclopenta[e][1,2]oxazine 5ma**

<sup>1</sup>H NMR (300 MHz, CDCl<sub>3</sub>), major/minor = 24:1

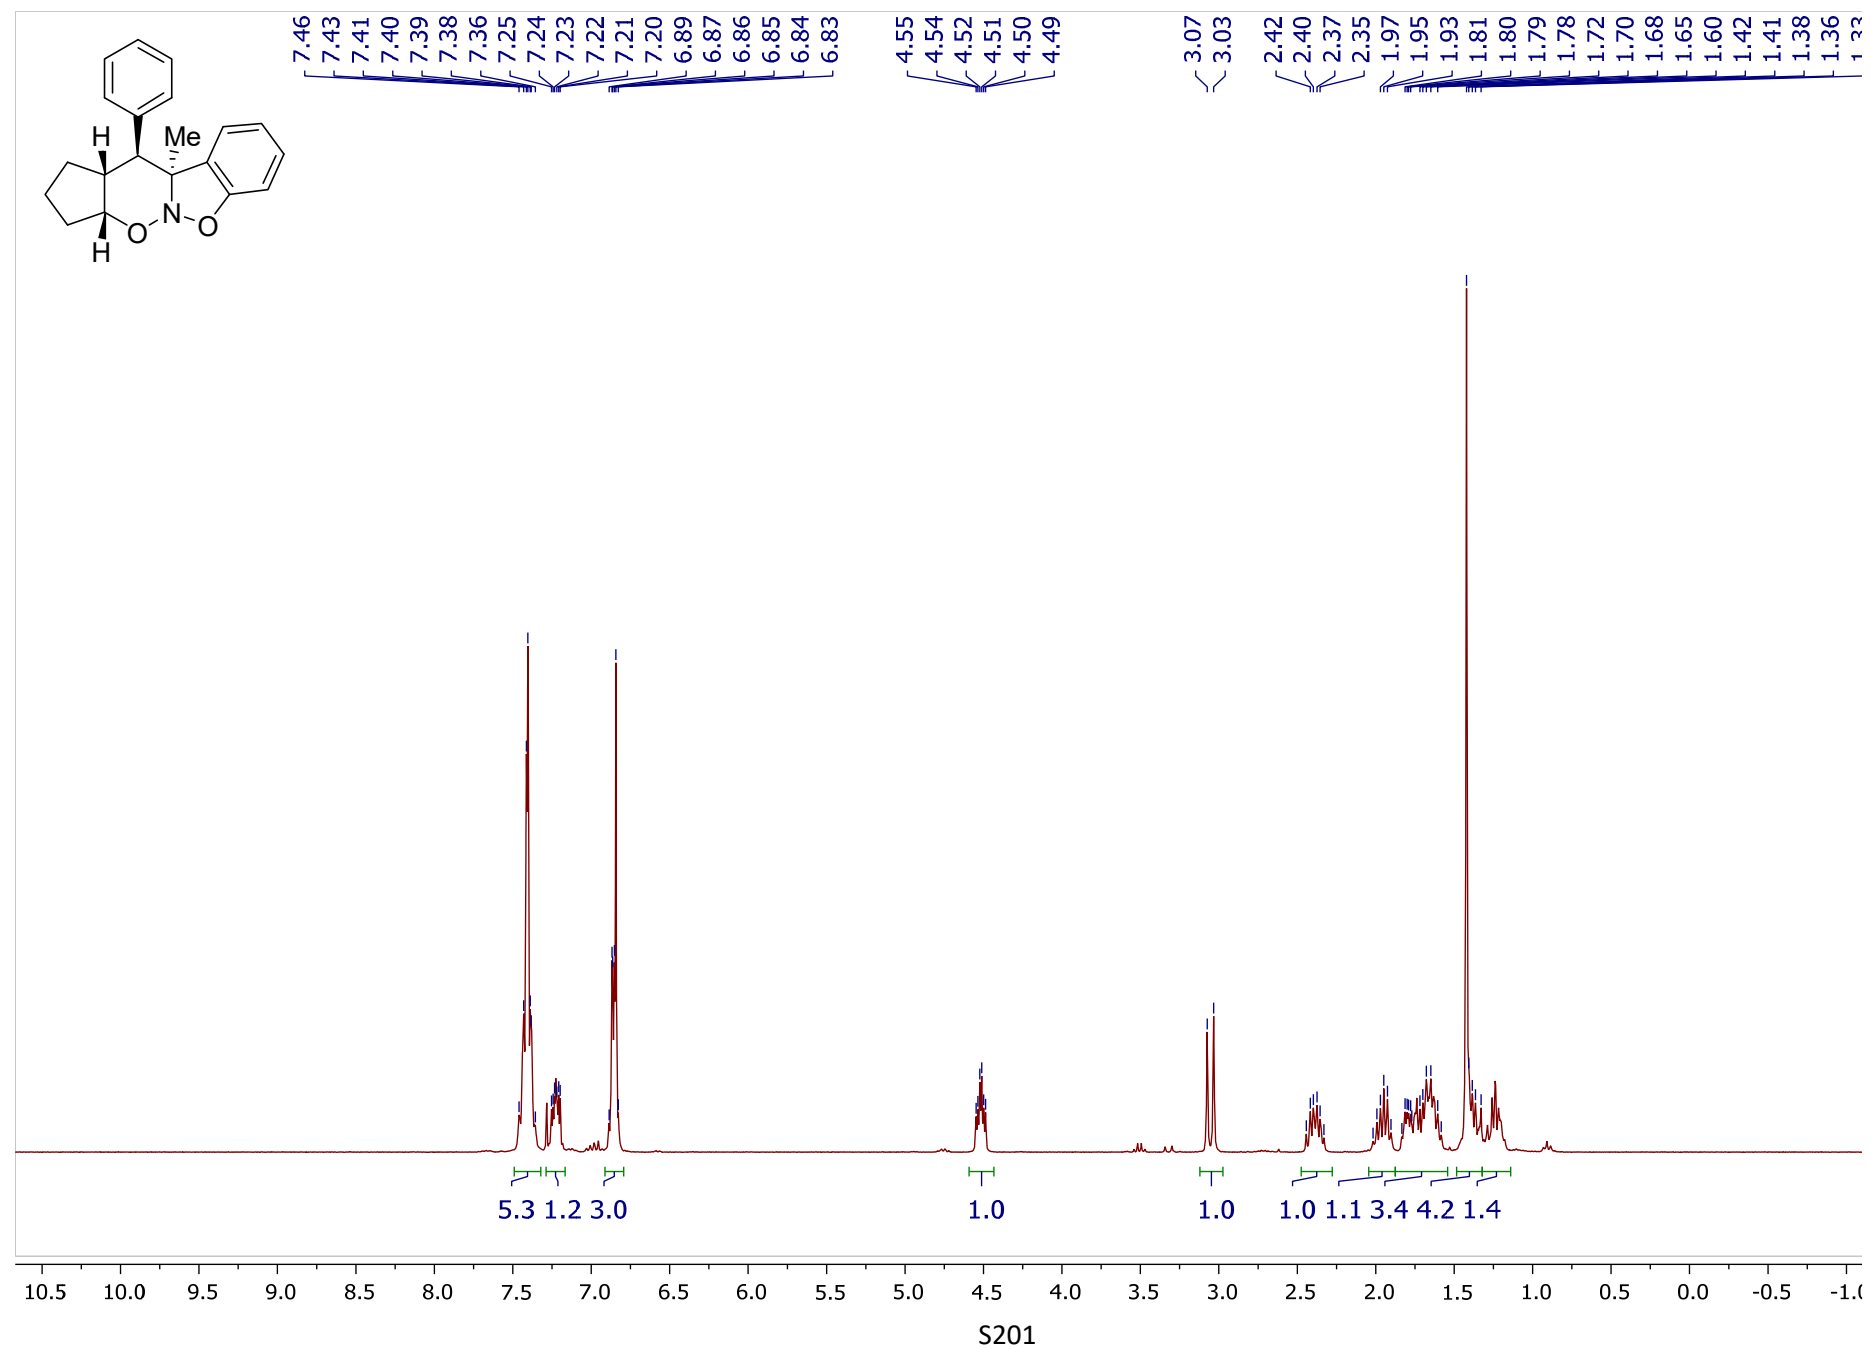

$^{13}\text{C}$  NMR (75 MHz,  $\text{CDCl}_3$ )

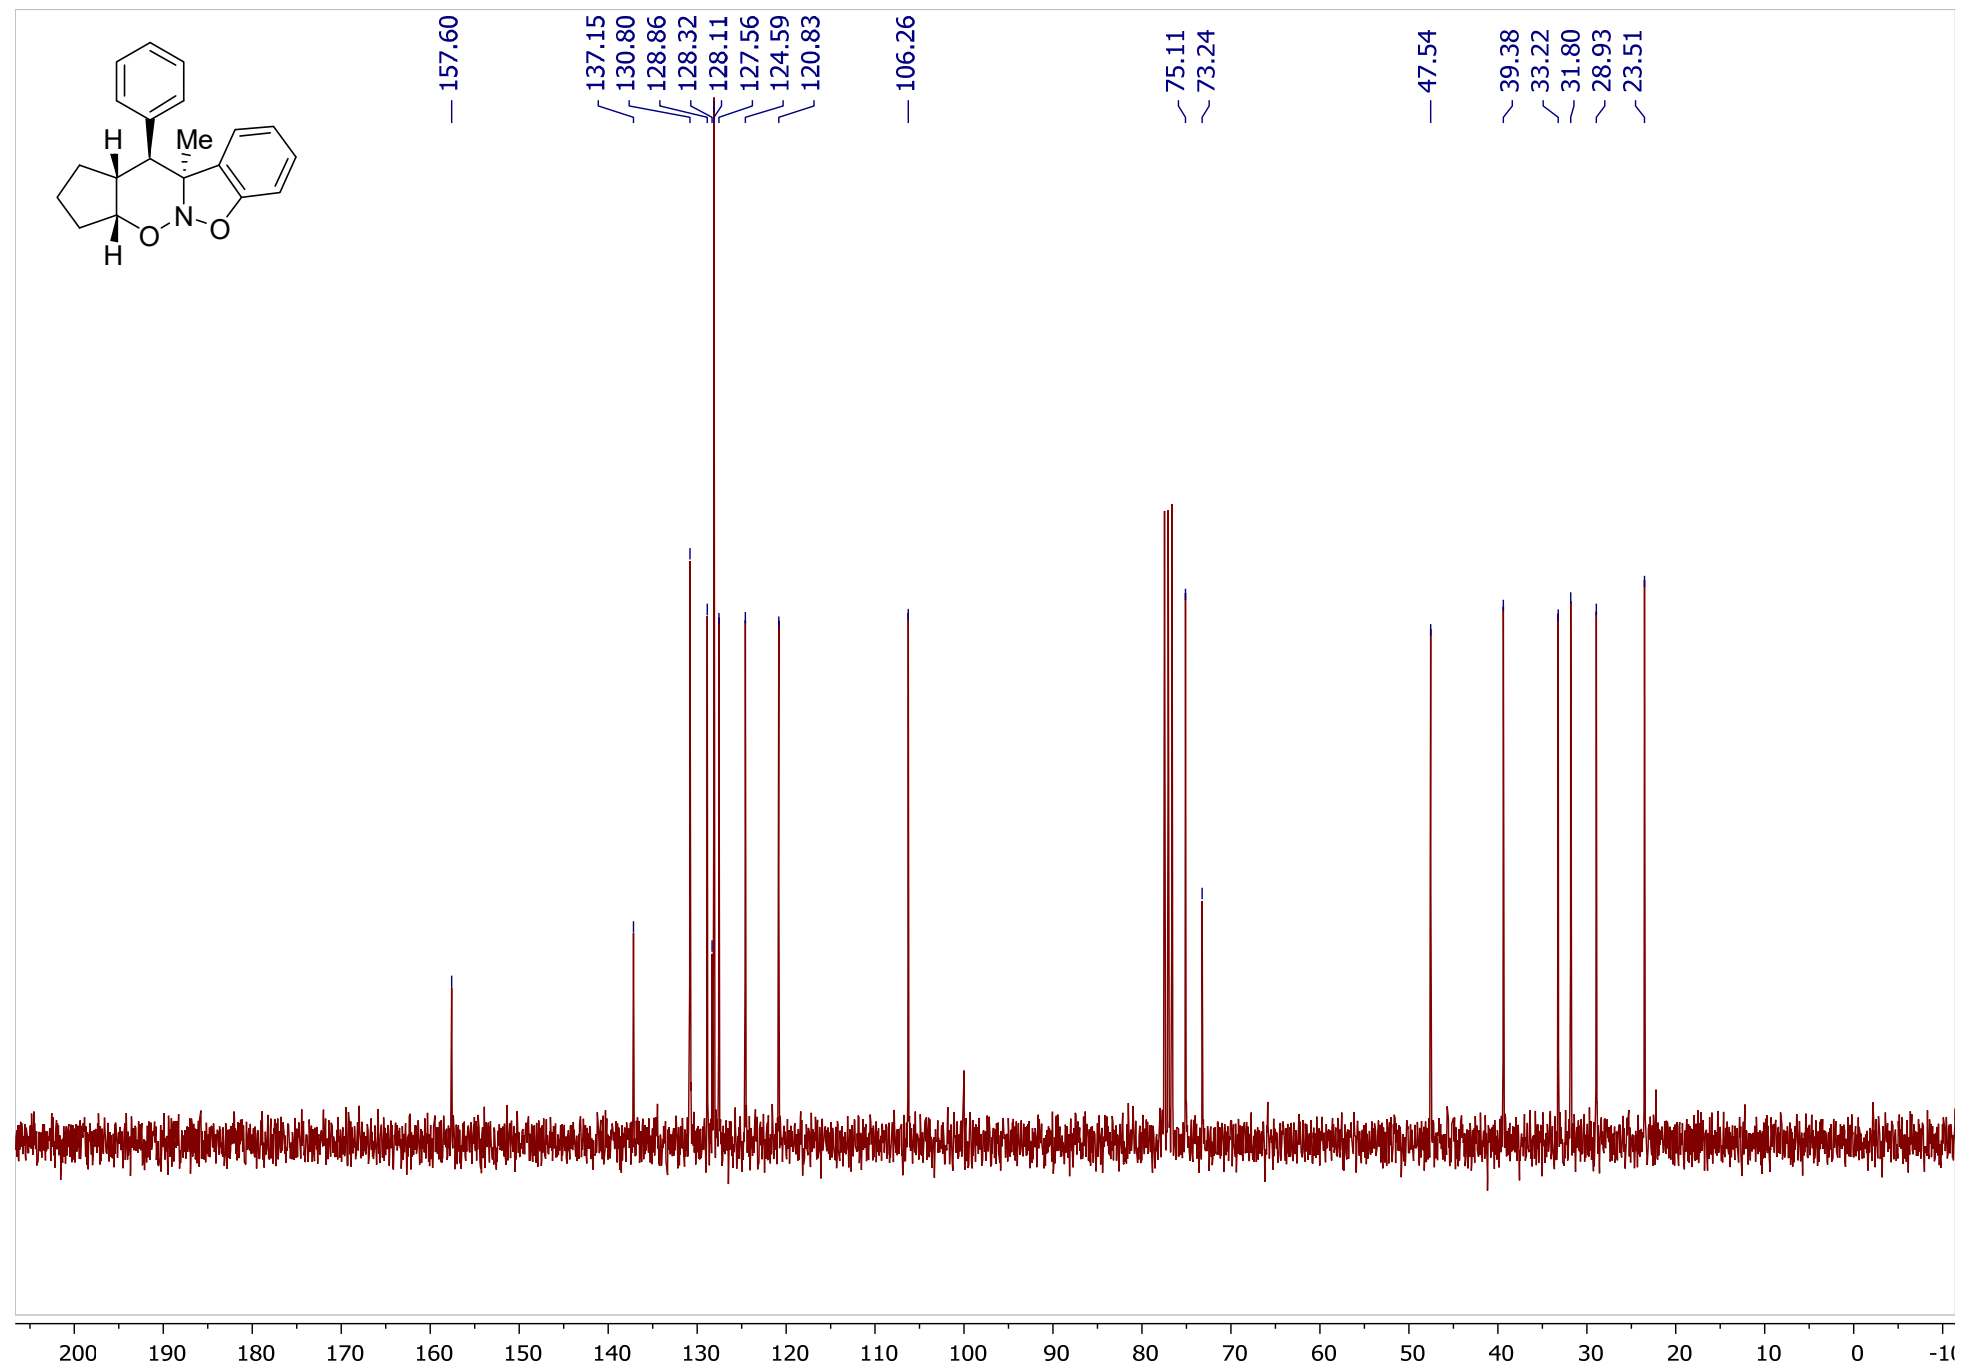

S202

$^{13}\text{C}$  DEPT 135 (75 MHz,  $\text{CDCl}_3$ )

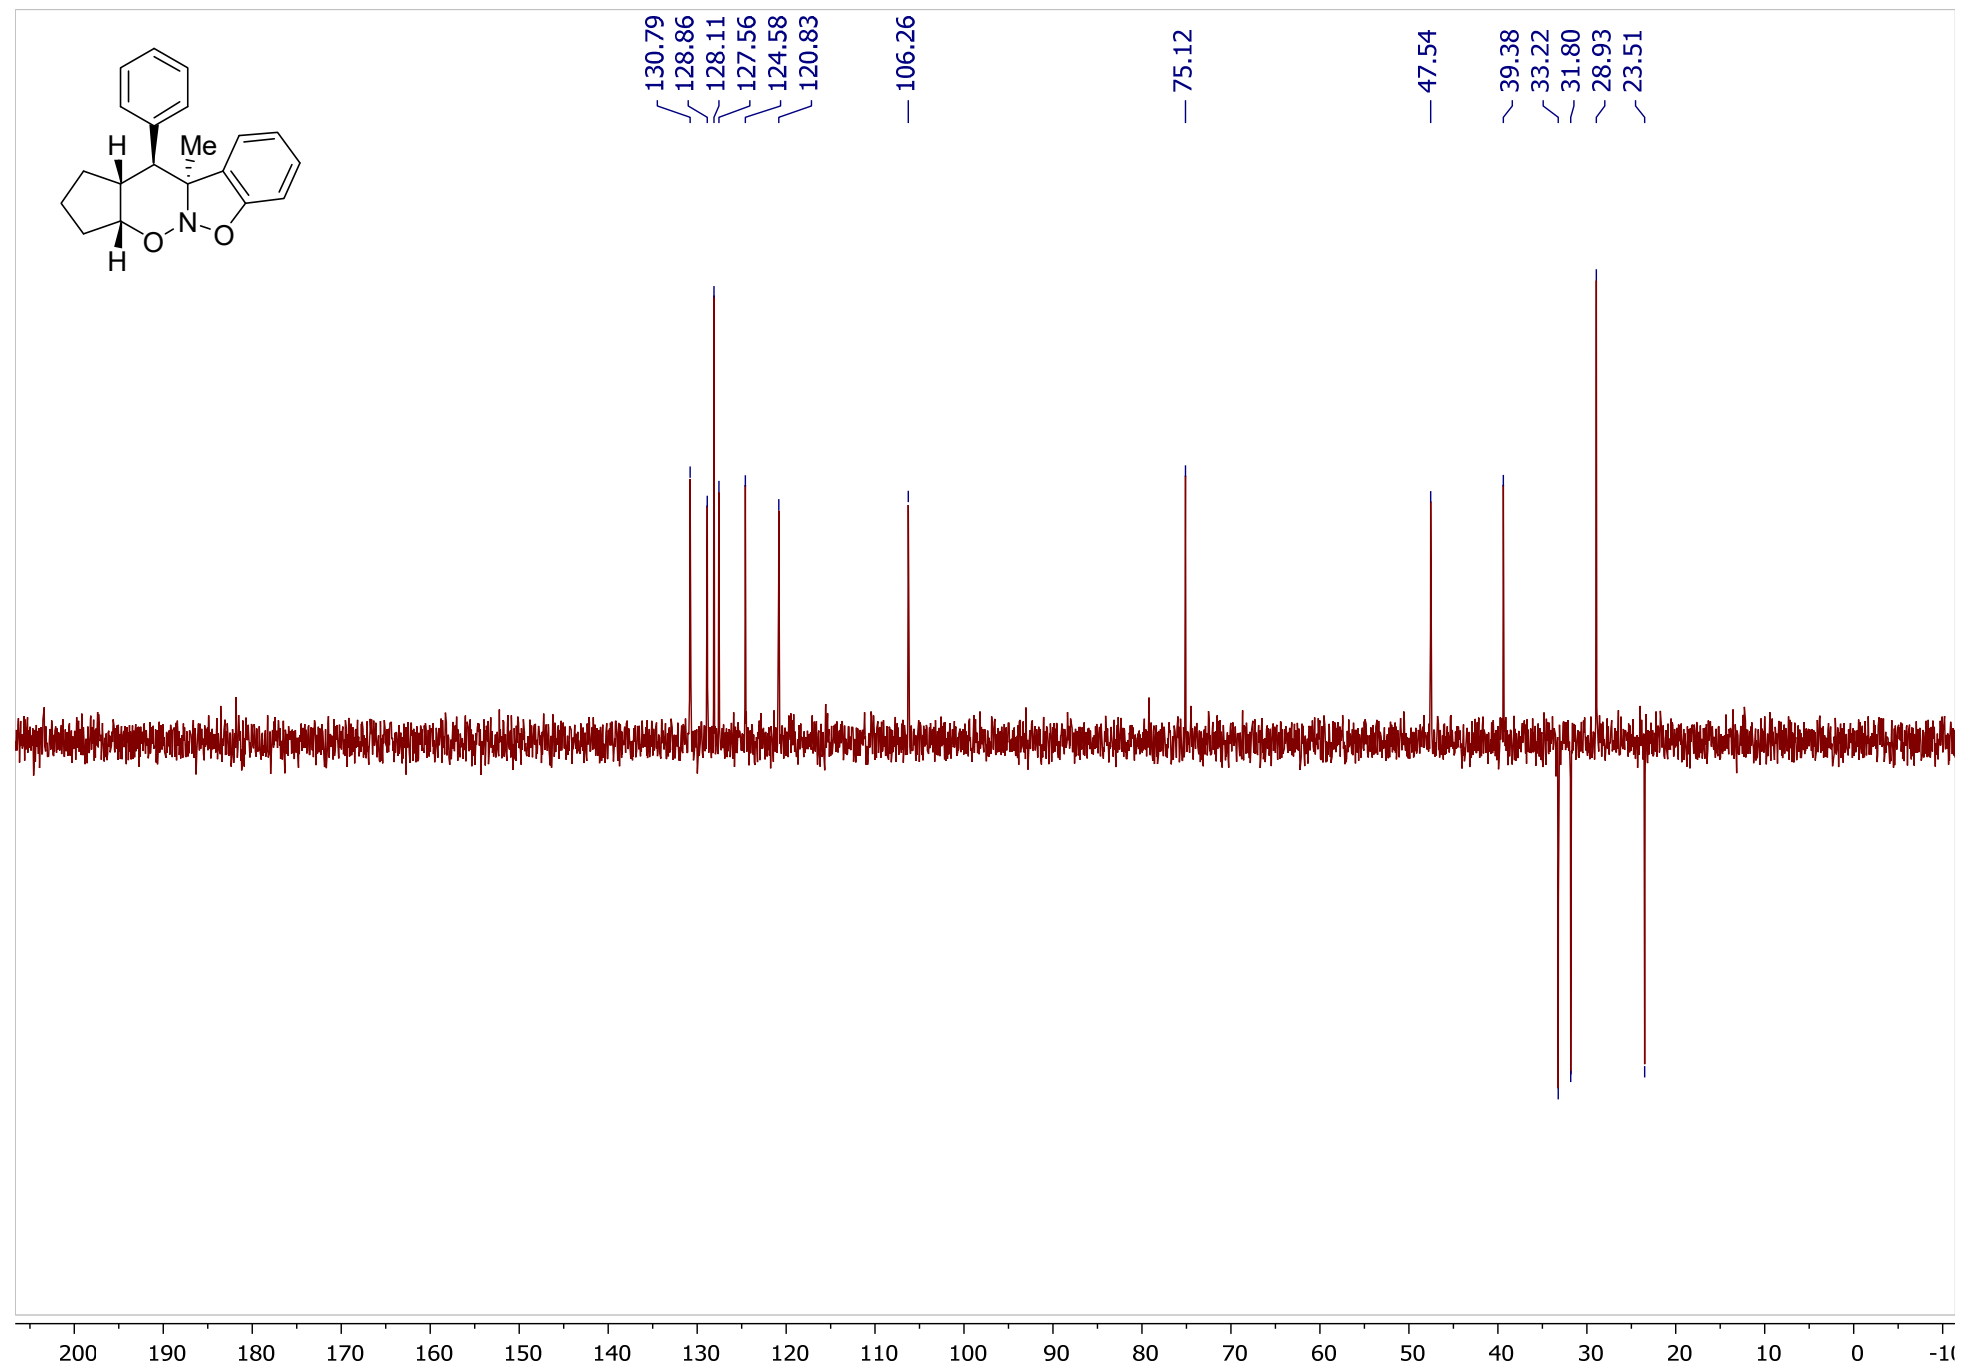

$^1\text{H}$ - $^1\text{H}$  COSY

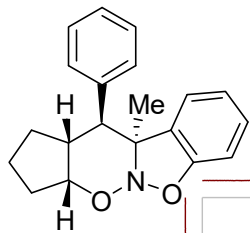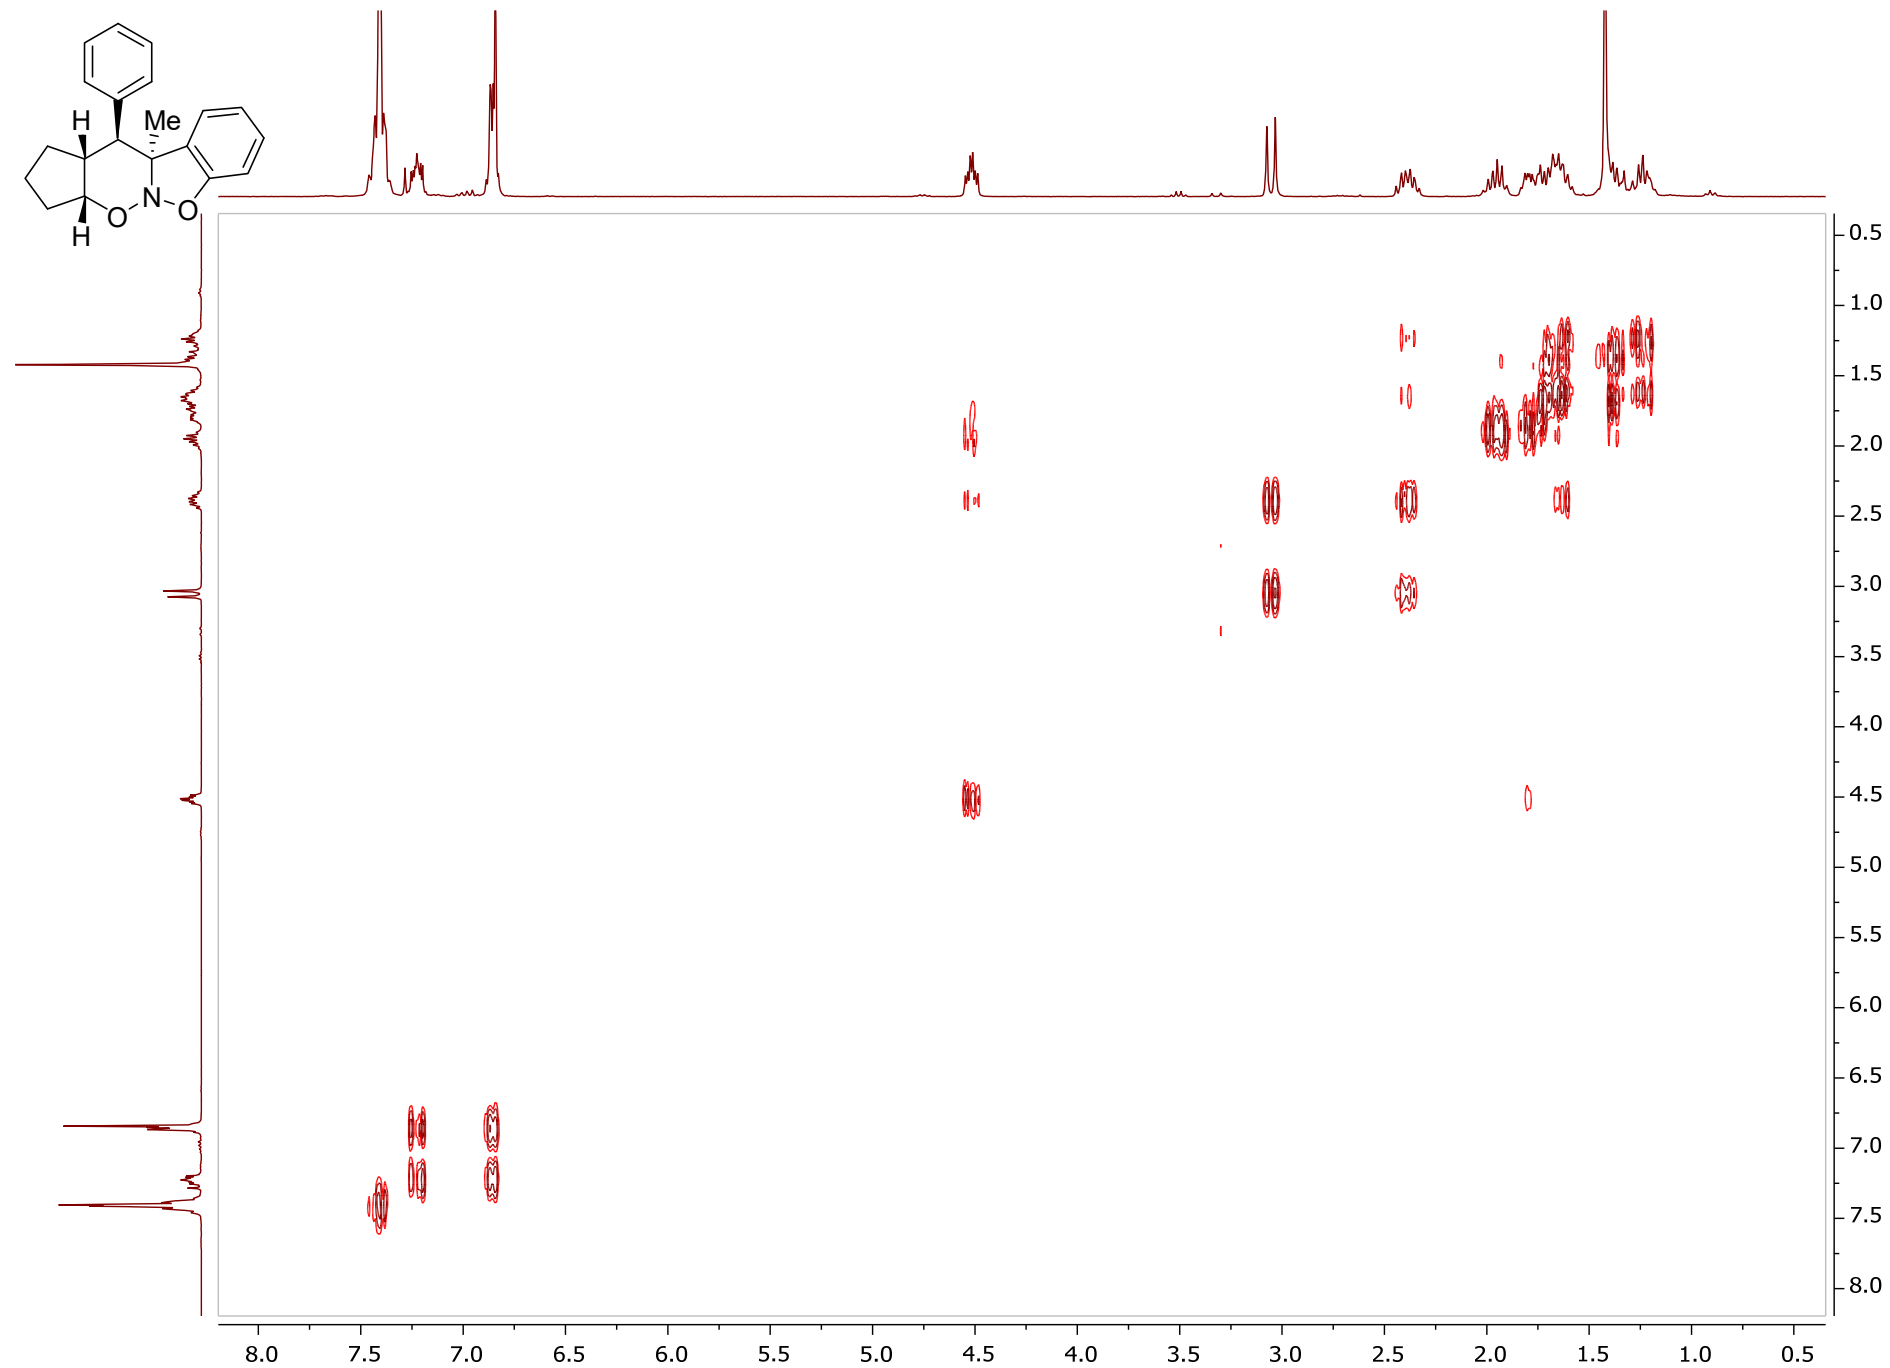

S204

$^1\text{H}$ - $^{13}\text{C}$  HSQC

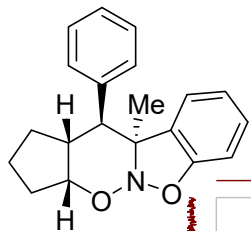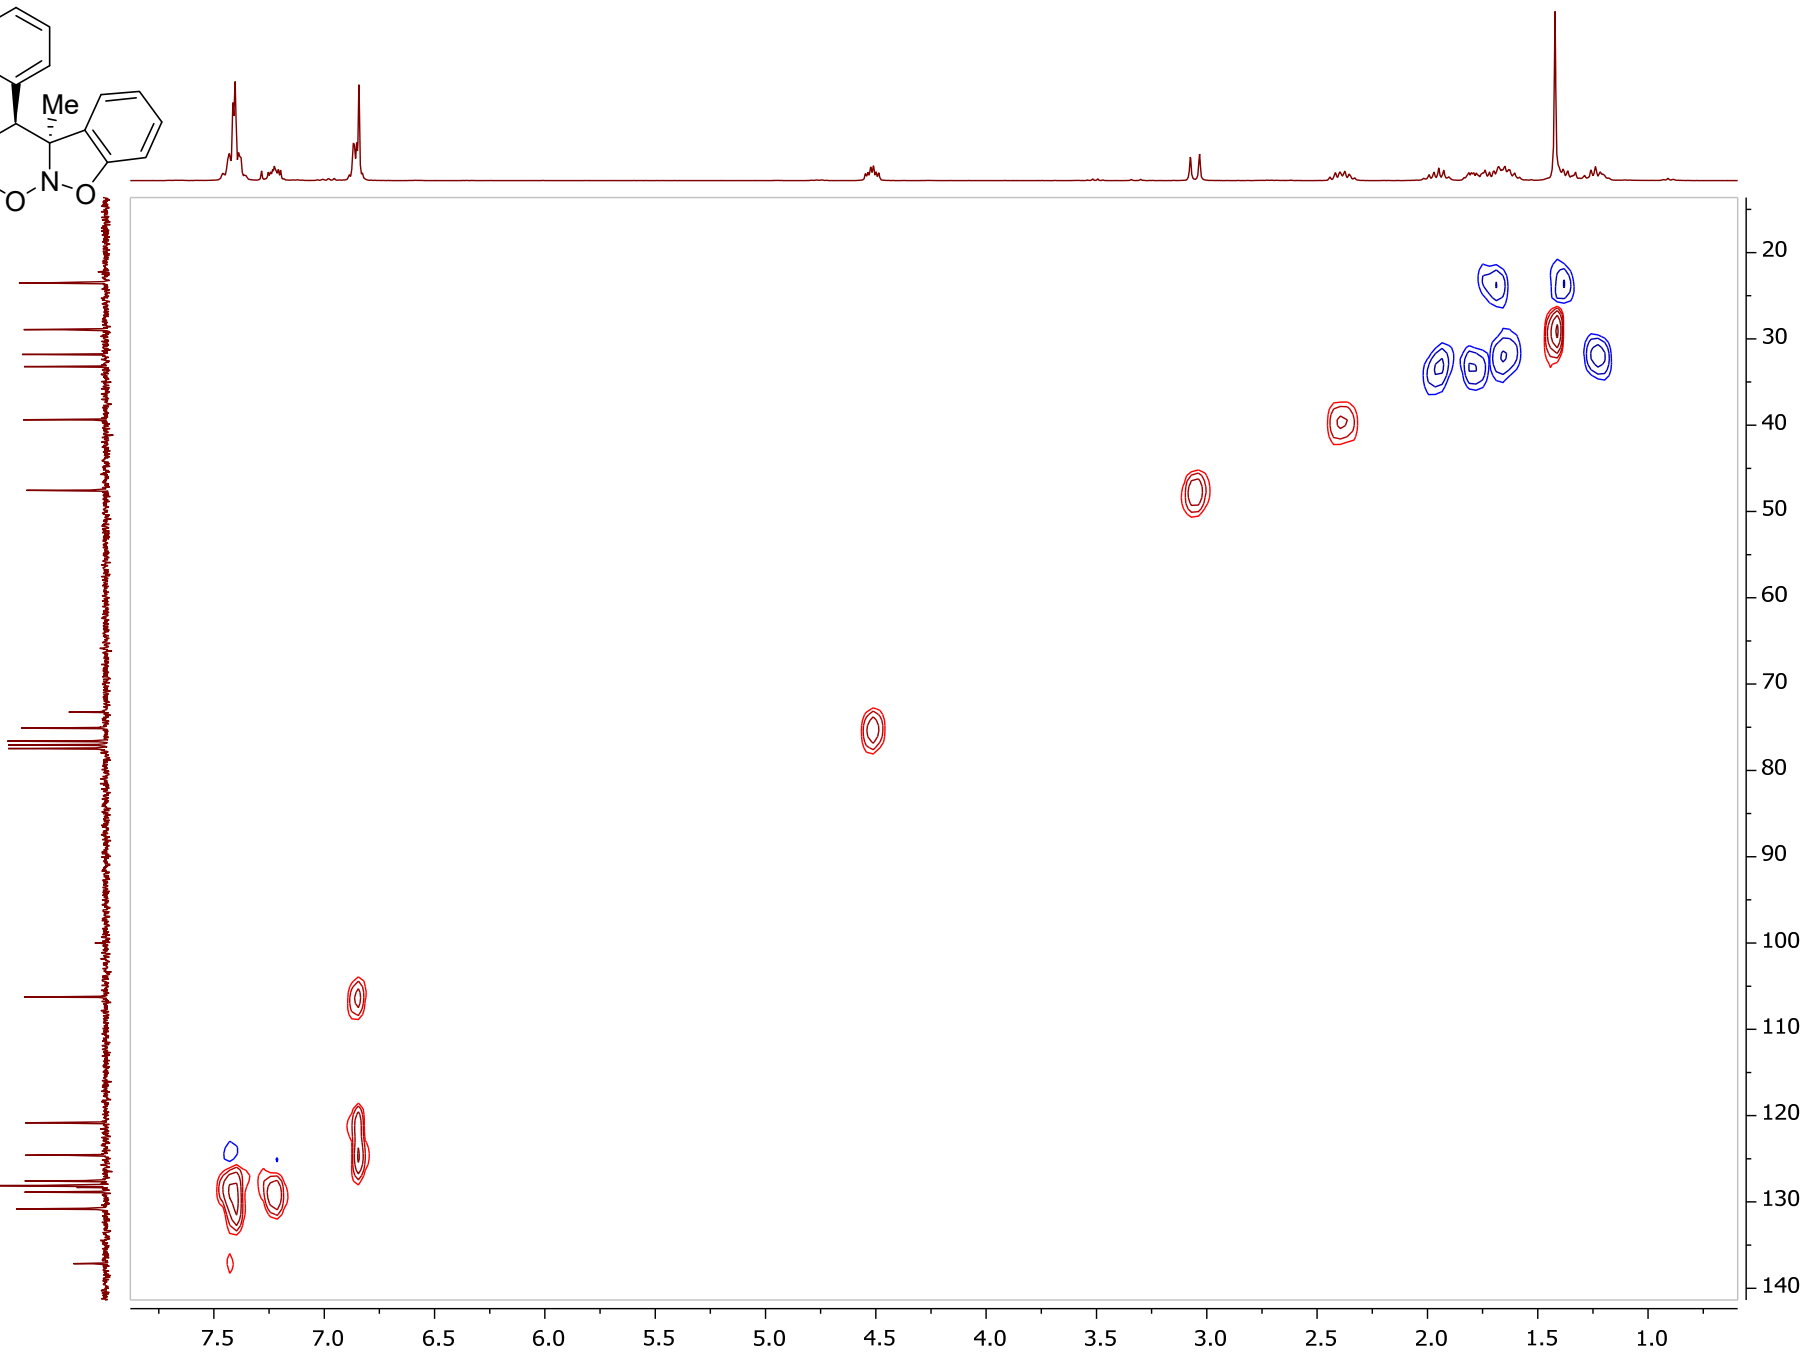

S205

$^1\text{H}$ - $^1\text{H}$  NOESY

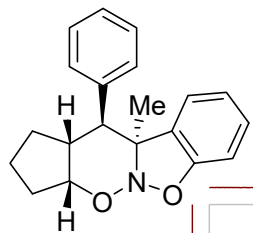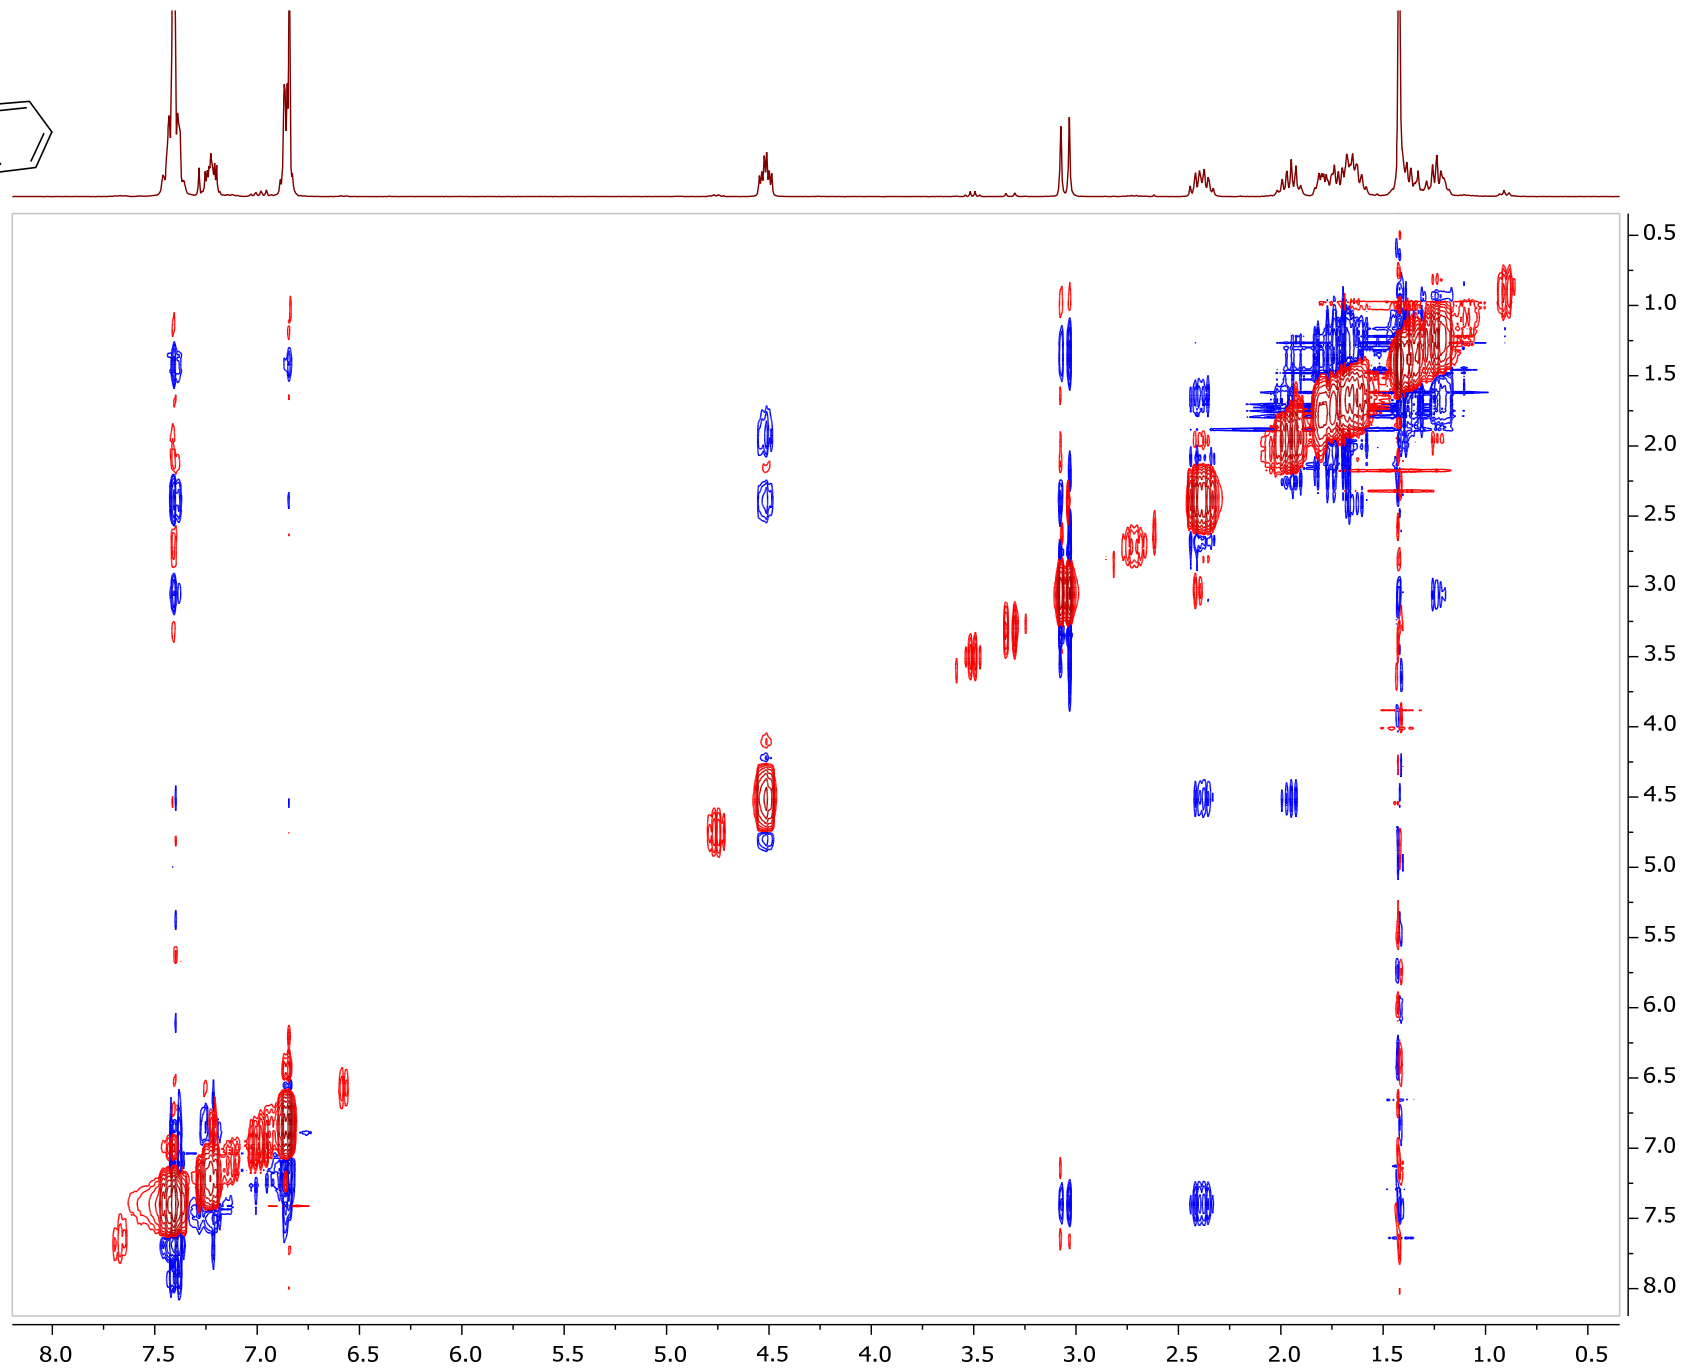

**(3aR\*,10bS\*,11S\*,11aR\*)-10b-Methyl-11-phenyl-2,3,3a,10b,11,11a-hexahydro-1H-benzo[4,5]isoxazolo[2,3-b]cyclopenta[e][1,2]oxazine 5ma**

<sup>1</sup>H NMR (300 MHz, CDCl<sub>3</sub>), major/minor = 1:4

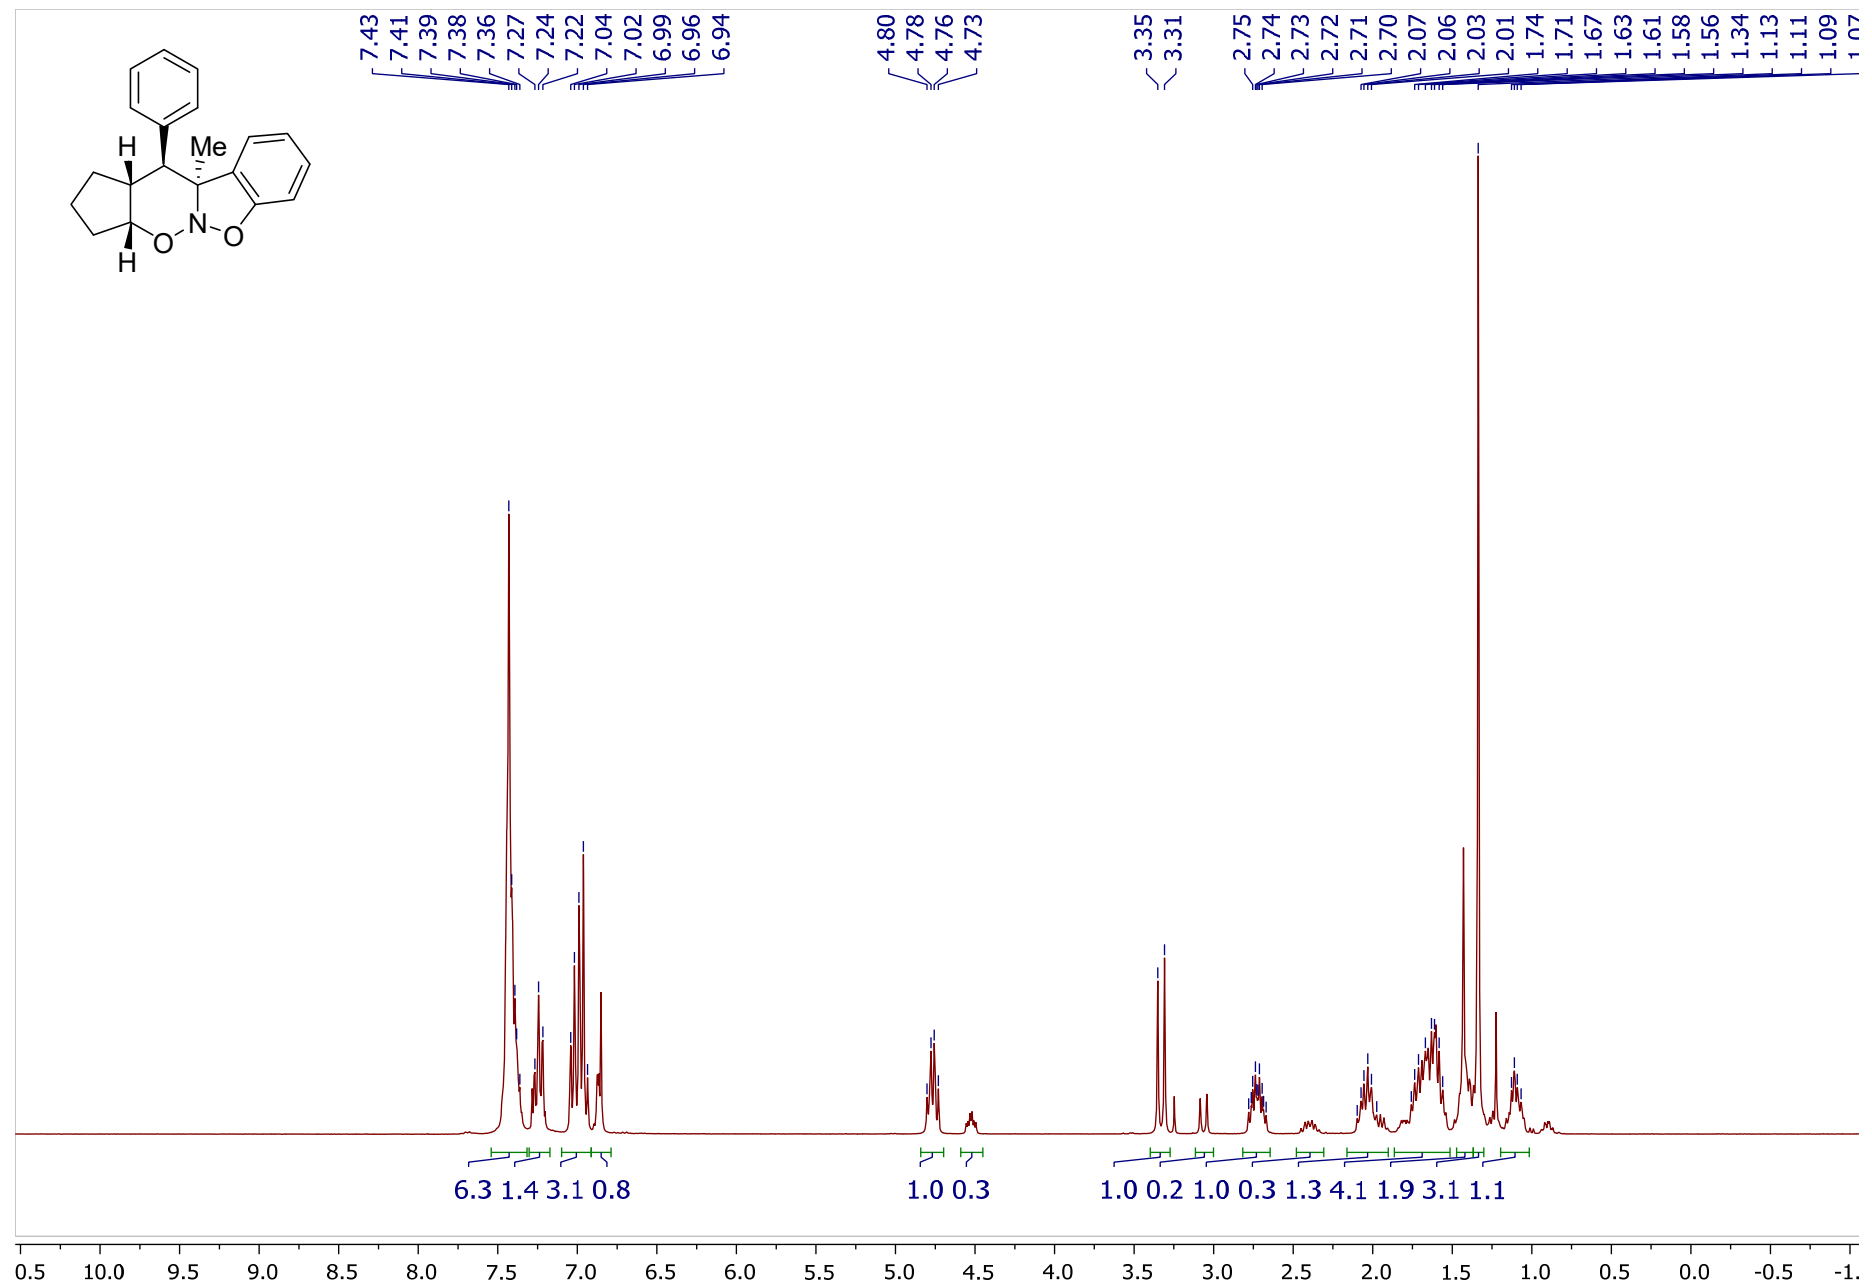

$^{13}\text{C}$  NMR (75 MHz,  $\text{CDCl}_3$ )

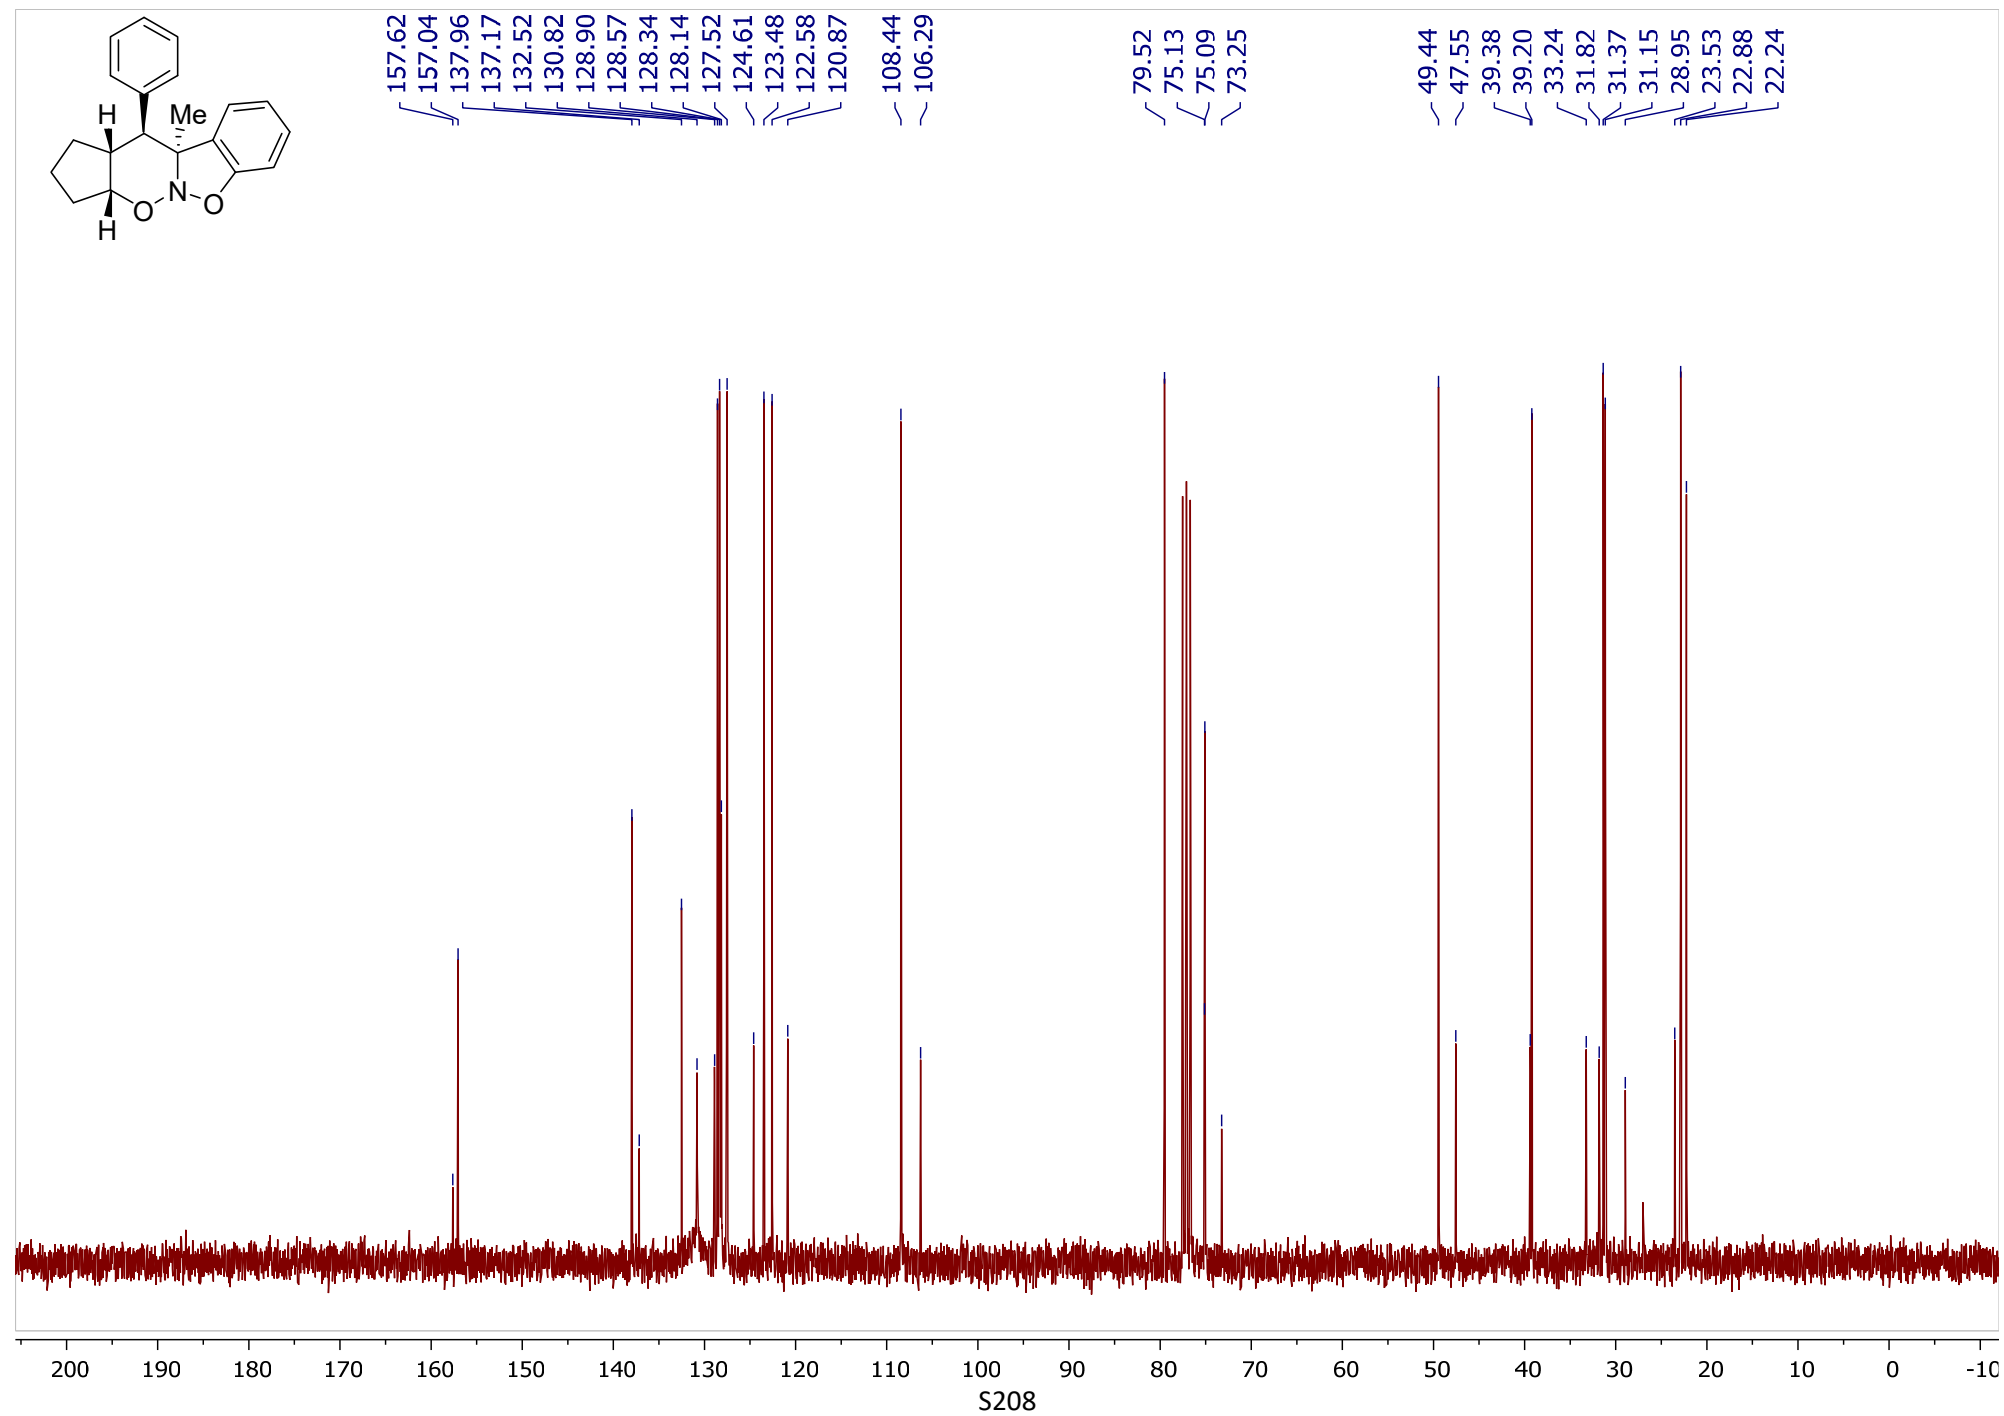



$^{13}\text{C}$  DEPT 135 (75 MHz,  $\text{CDCl}_3$ )

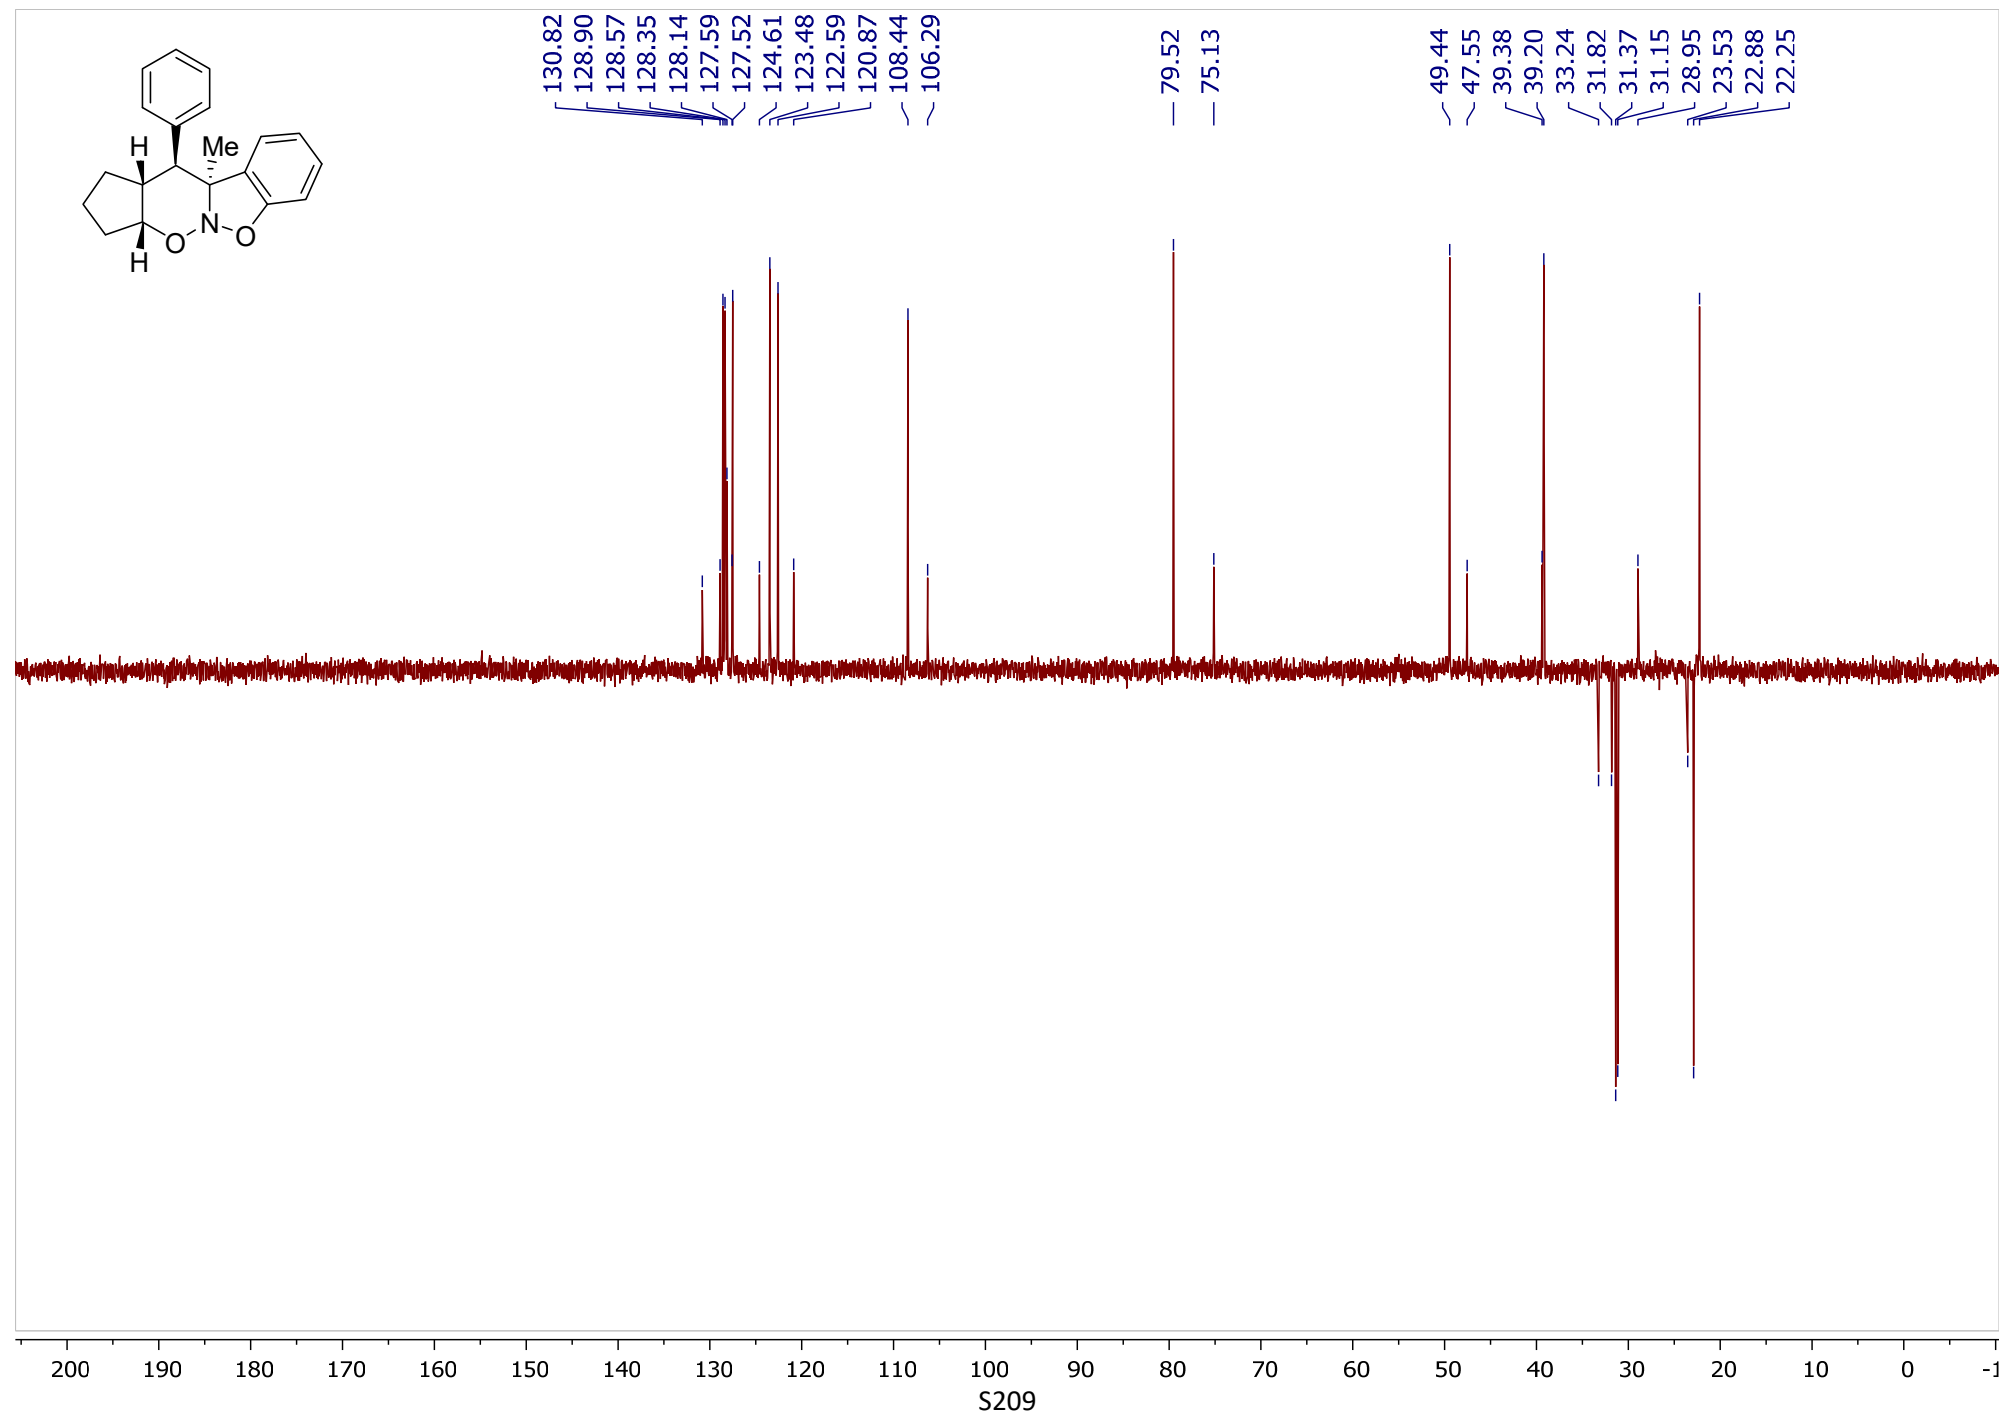

$^1\text{H}$ - $^1\text{H}$  COSY

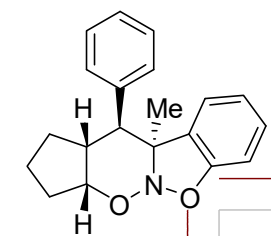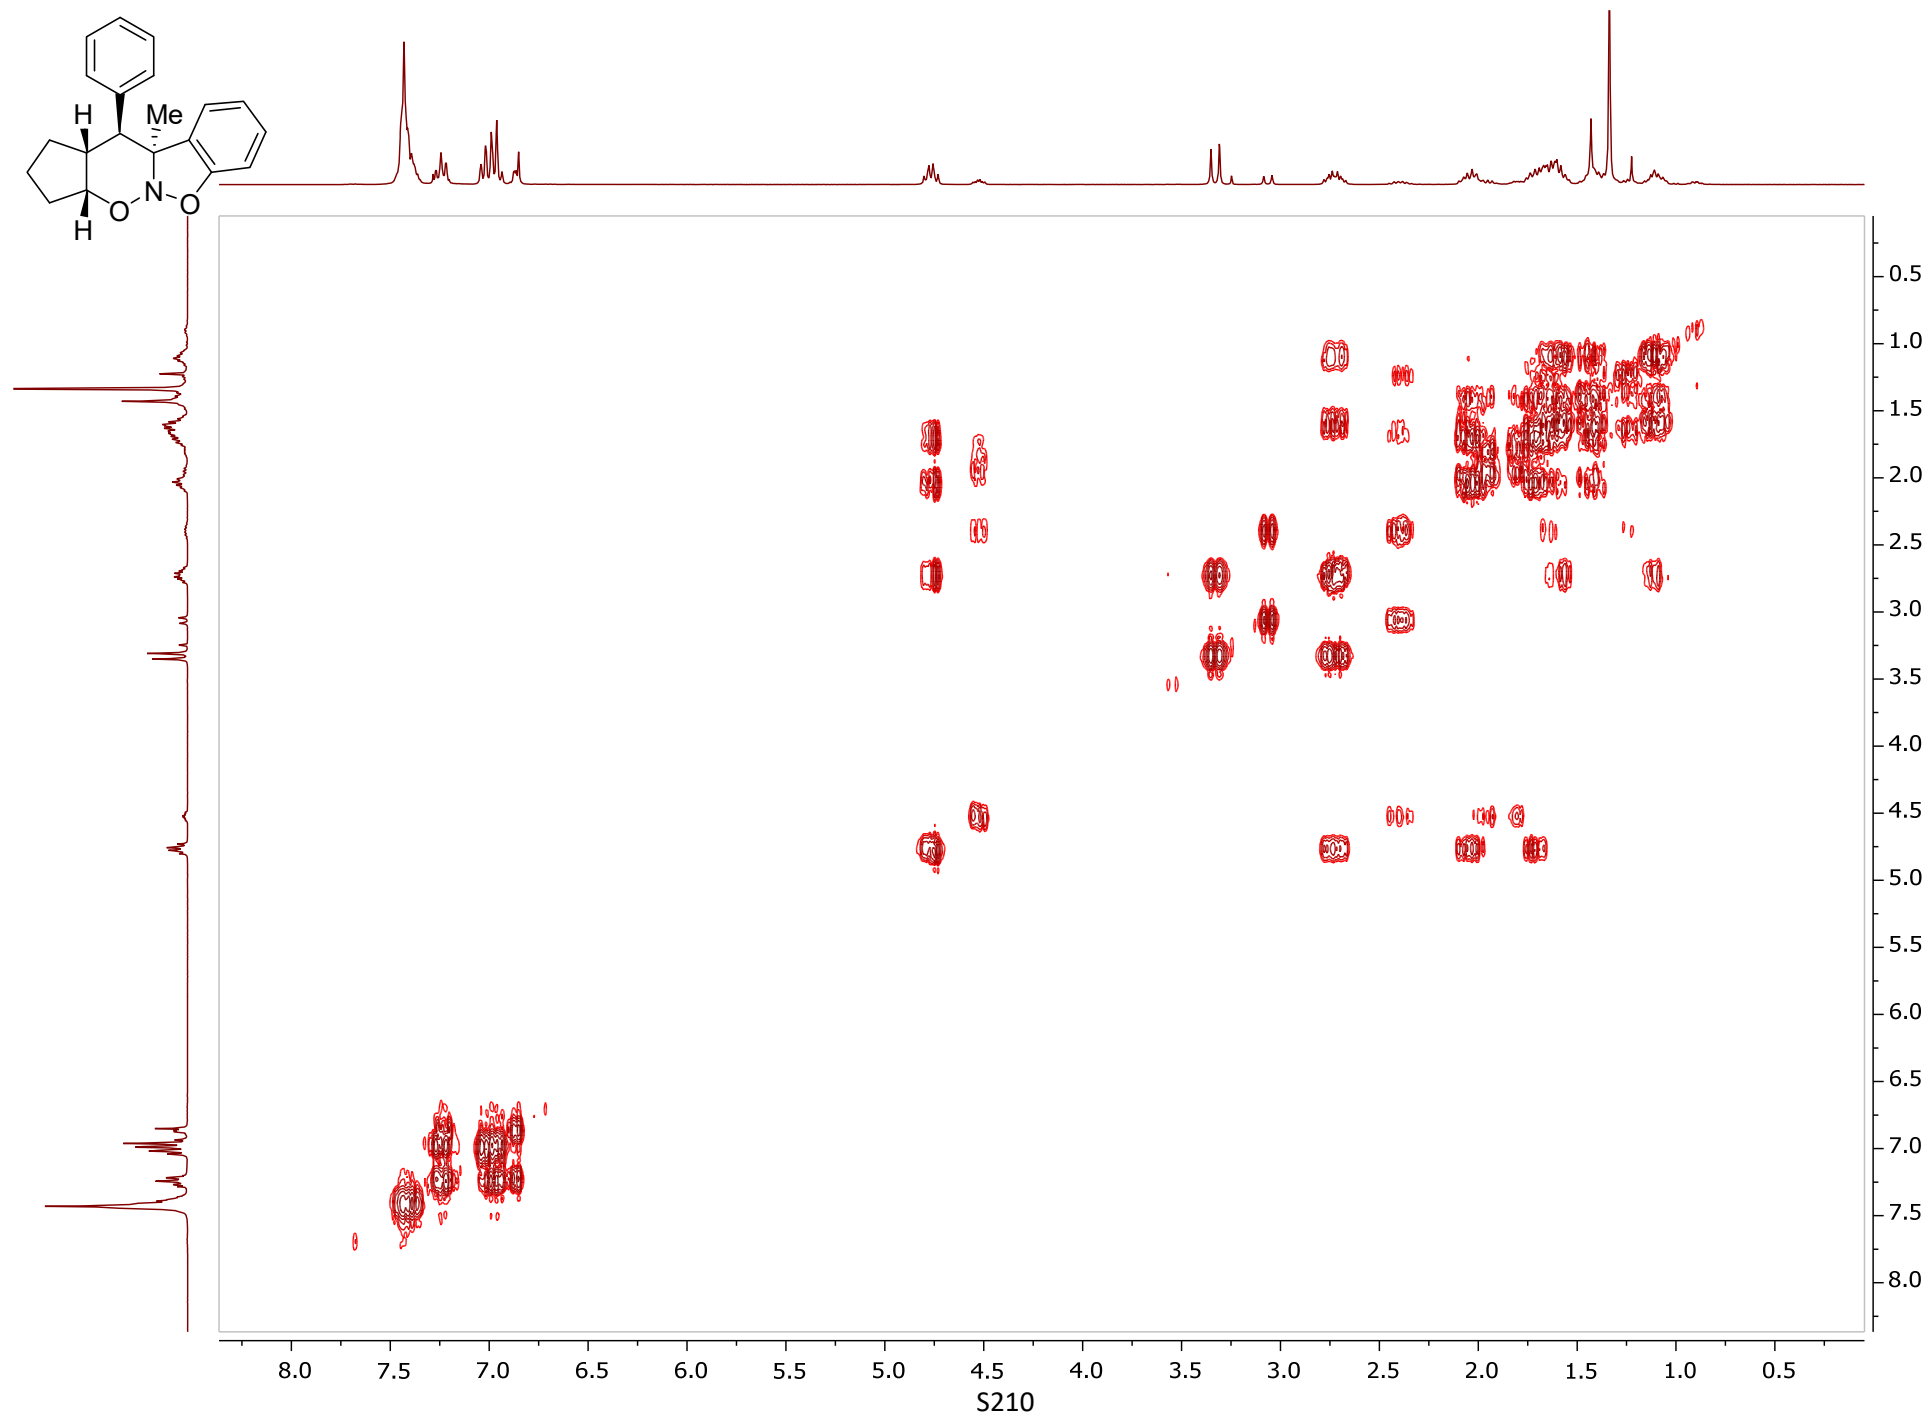

$^1\text{H}$ - $^{13}\text{C}$  HSQC

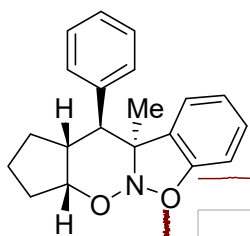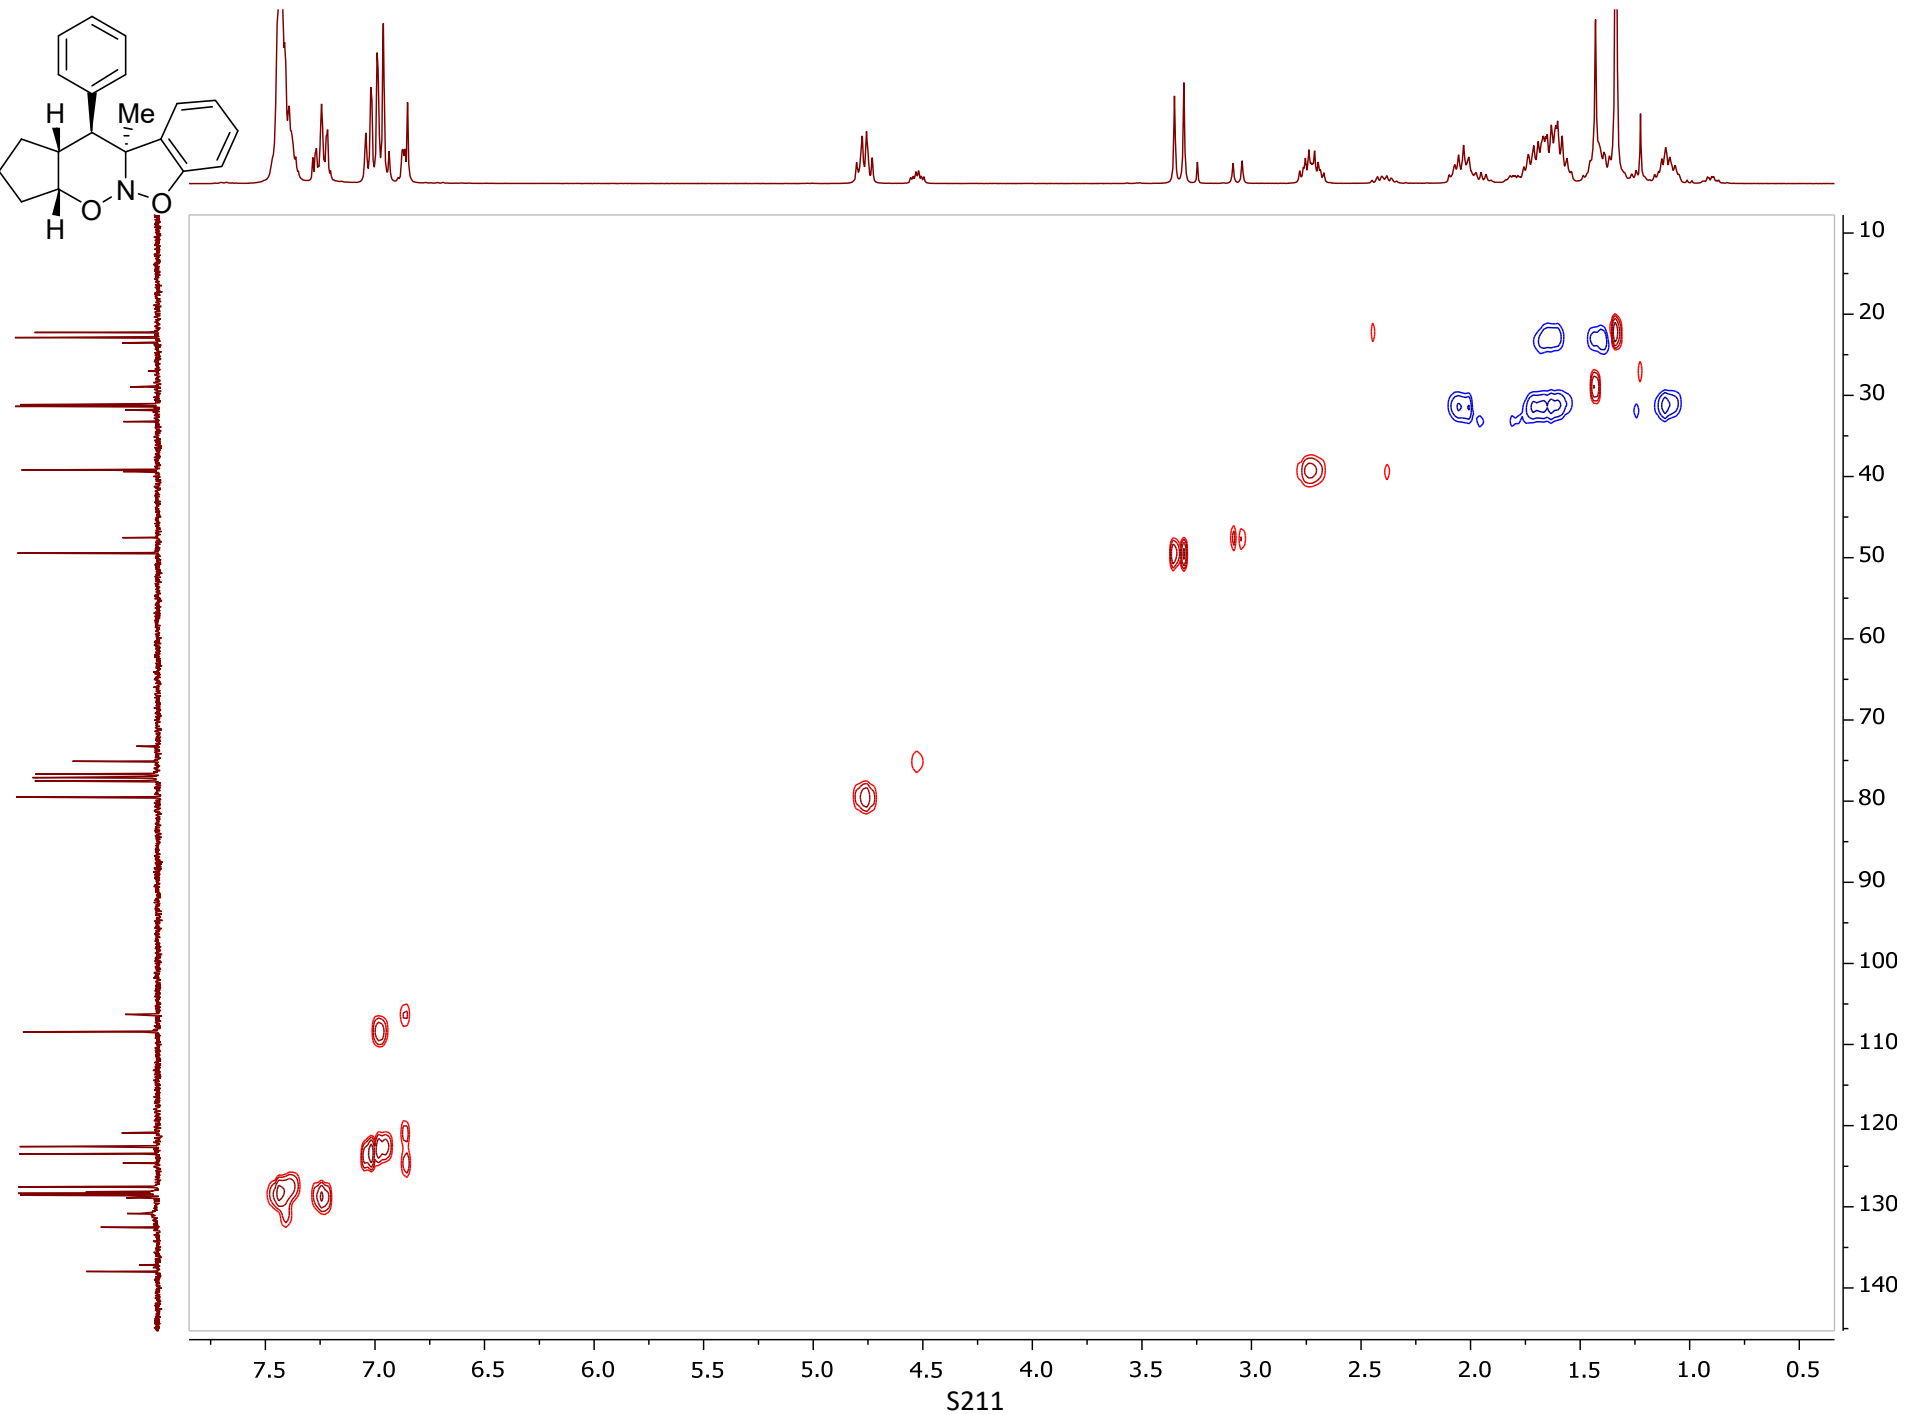

$^1\text{H}$ - $^{13}\text{C}$  HMBC

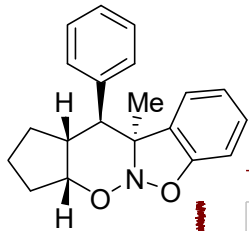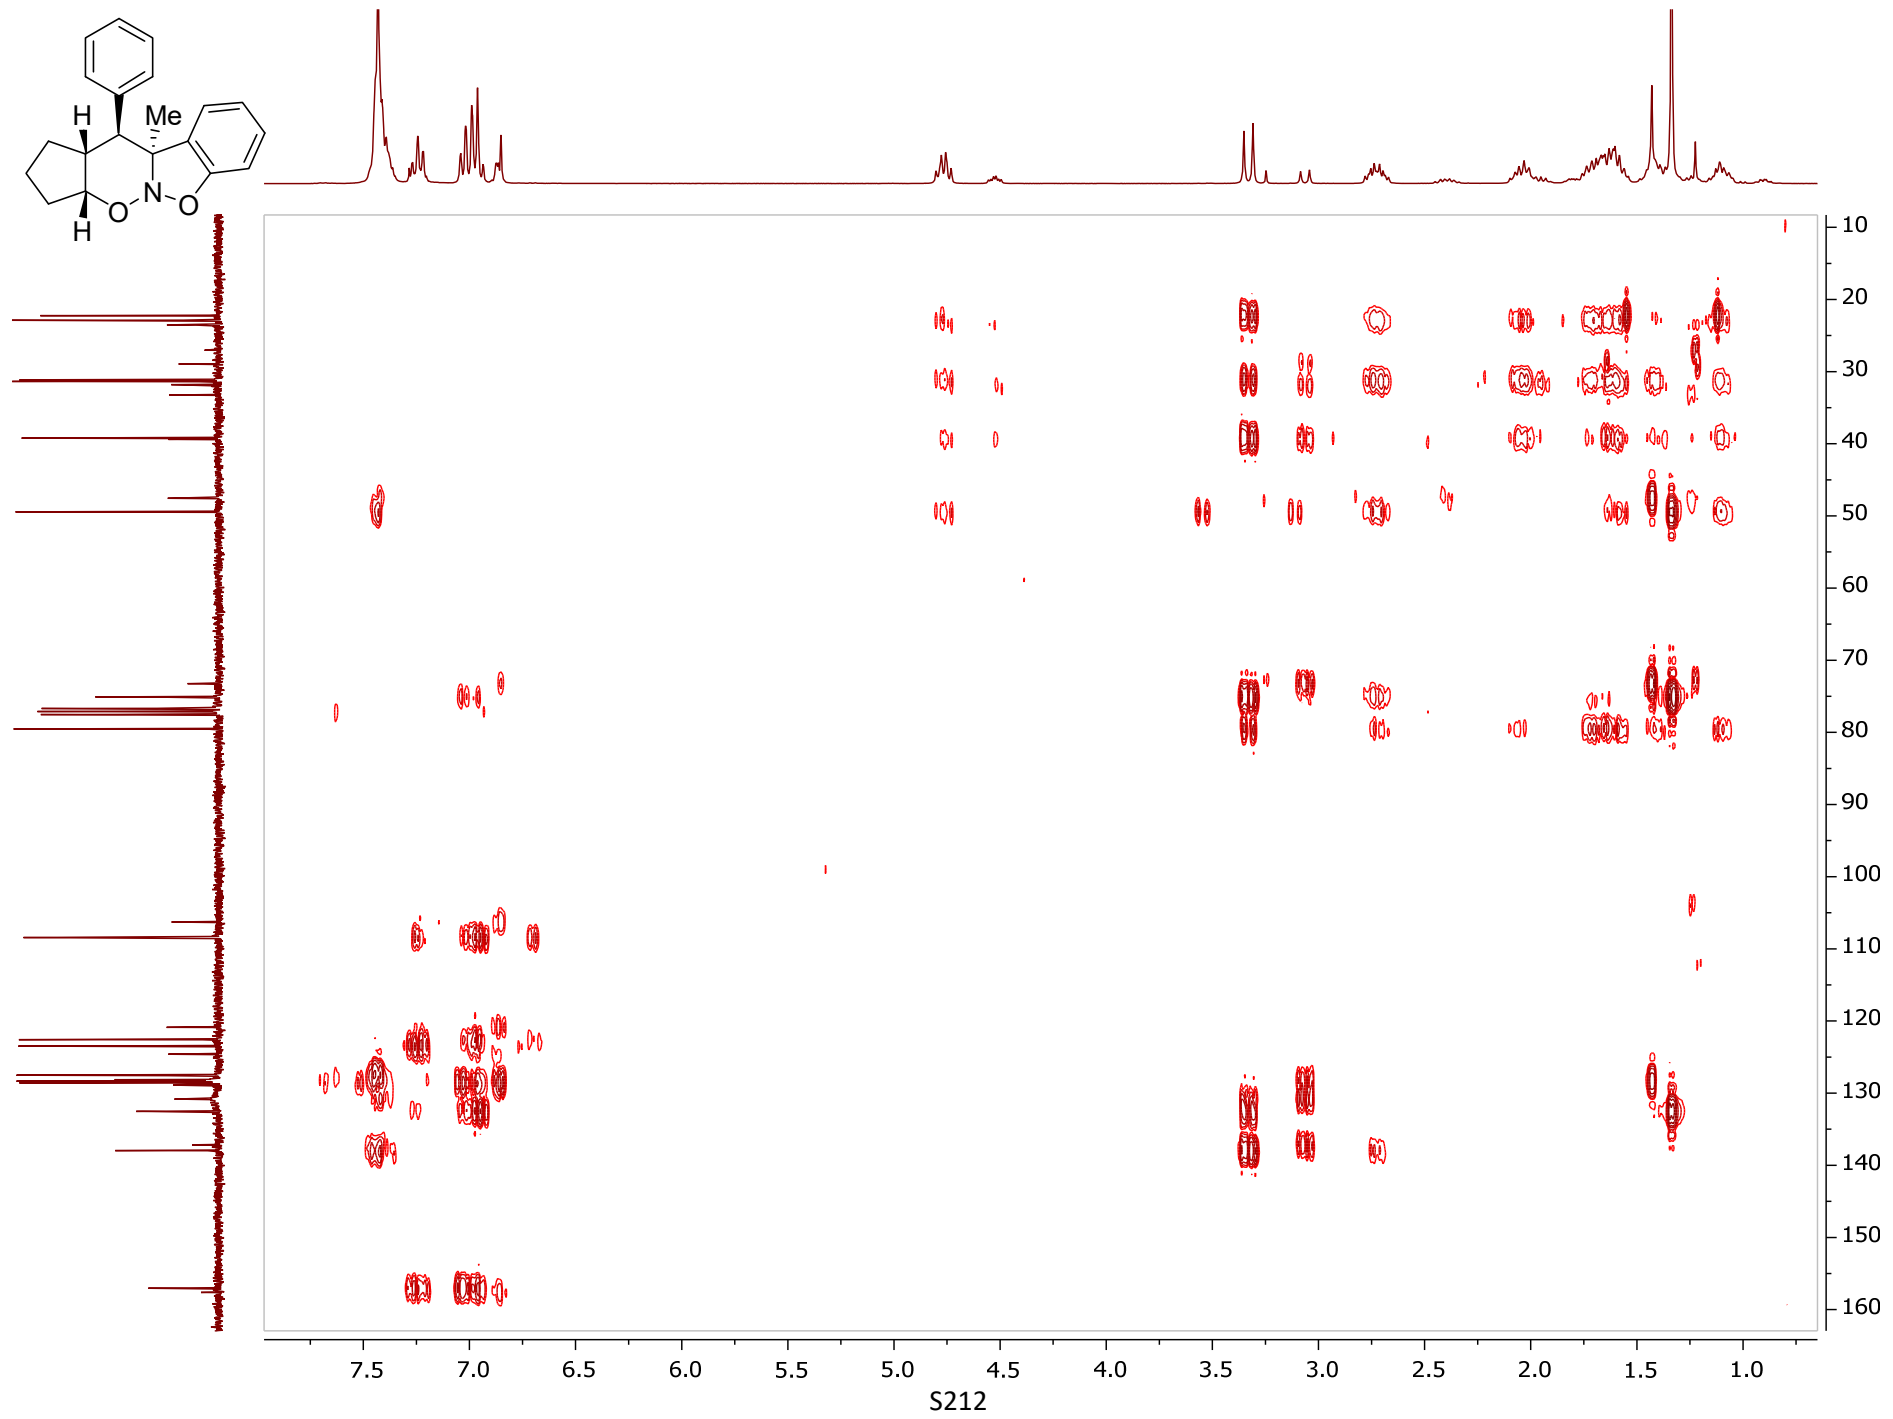

S212

$^1\text{H}$ - $^1\text{H}$  NOESY

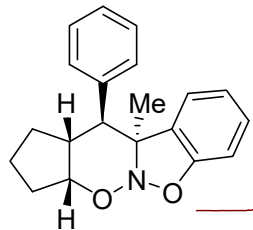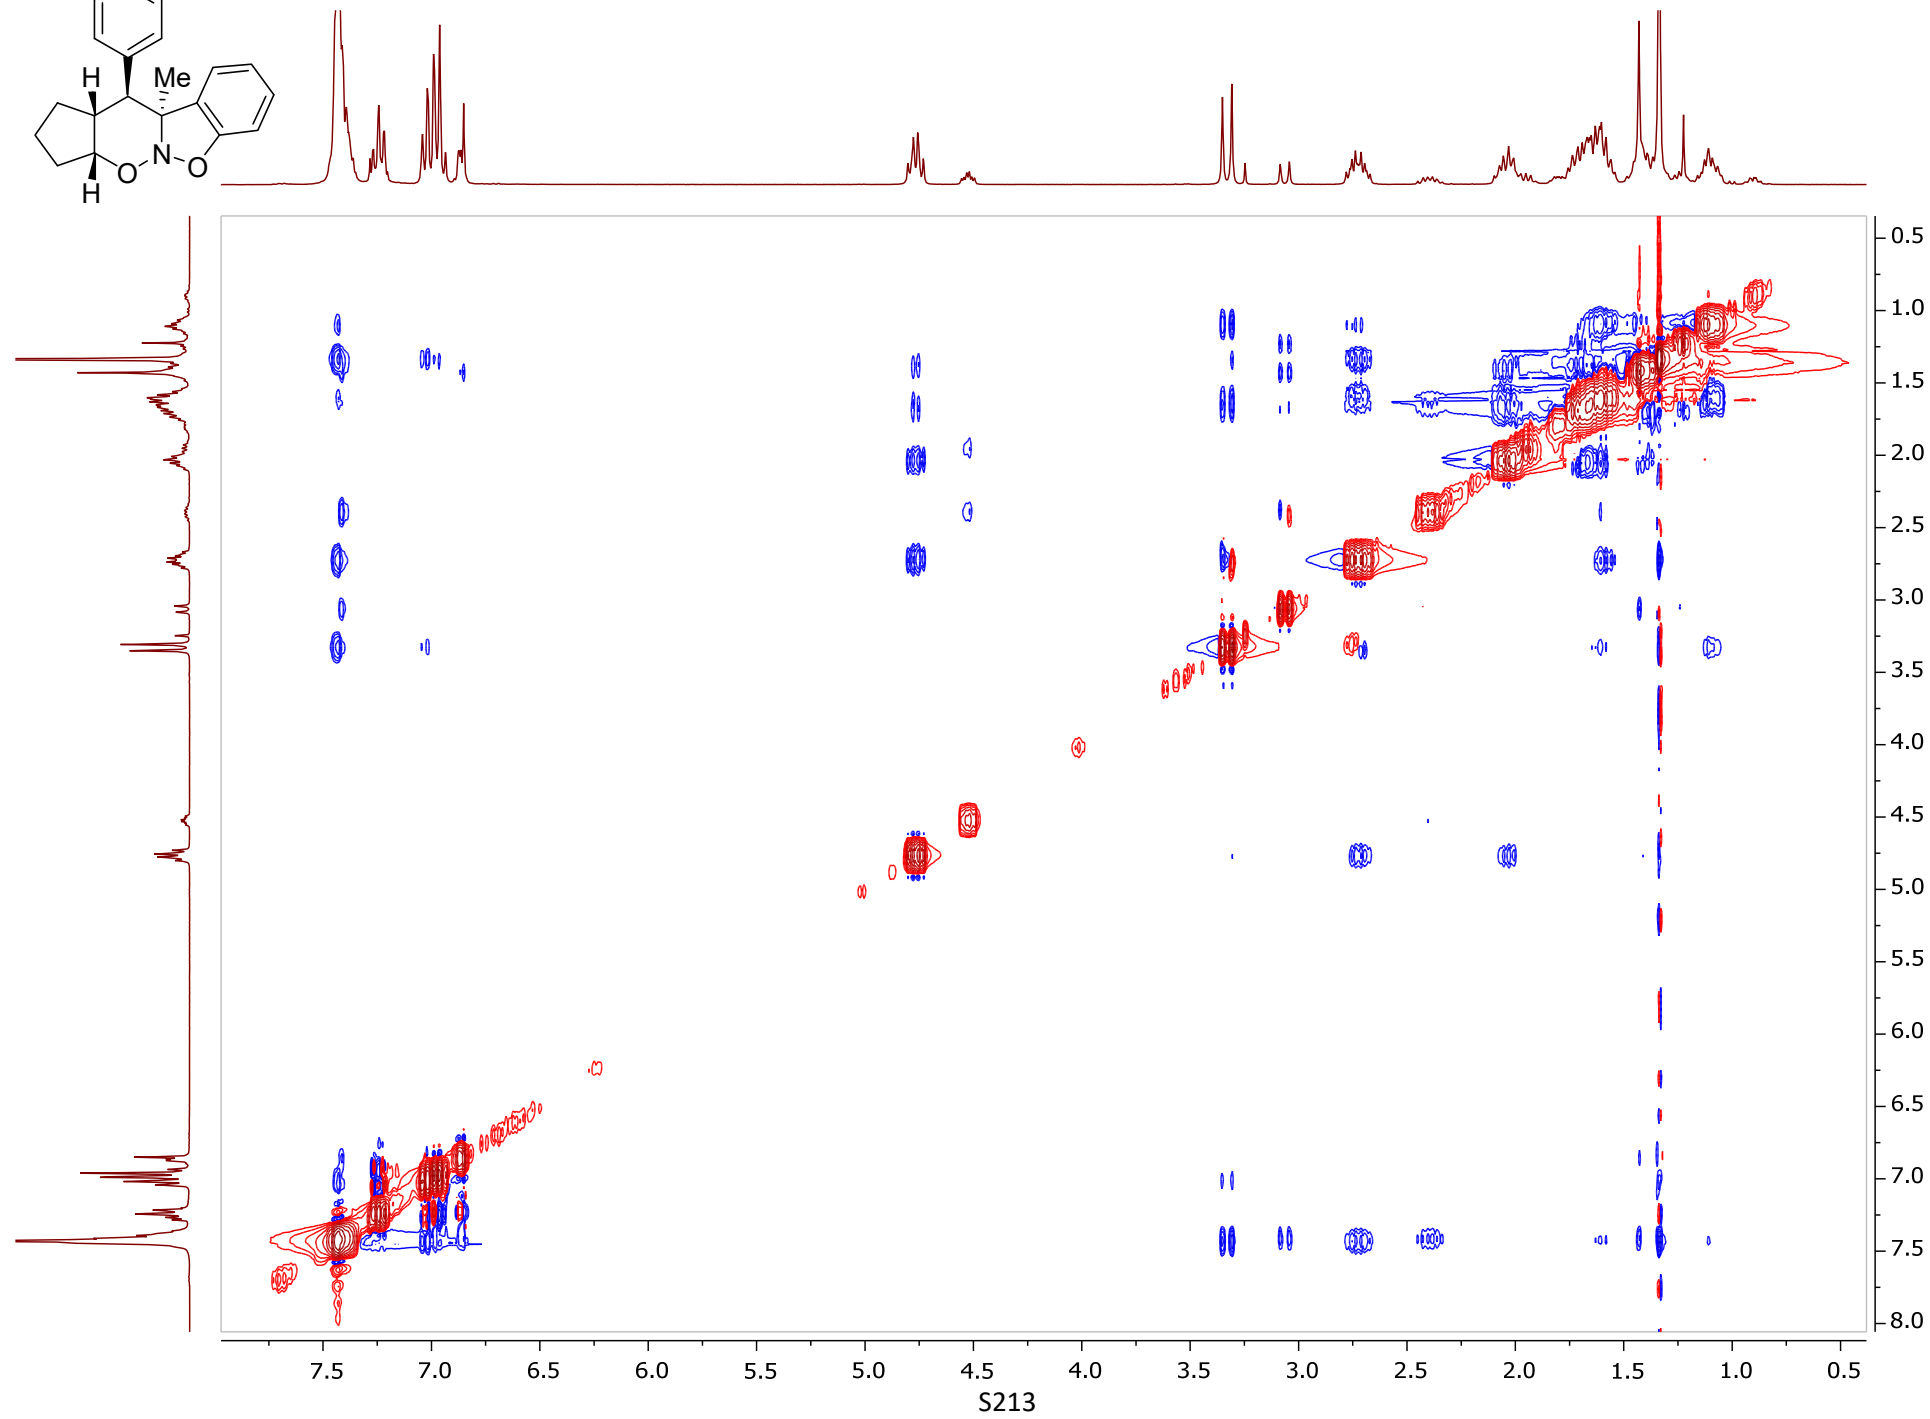

**(4*S*\*,4*aS*\*)-5-Methoxy-4-(4-methoxyphenyl)-2,2,4*a*-trimethyl-2,3,4,4*a*-tetrahydrobenzo[4,5]isoxazolo[2,3-*b*][1,2]oxazine 5ab, major isomer**

<sup>1</sup>H NMR (300 MHz, CDCl<sub>3</sub>)

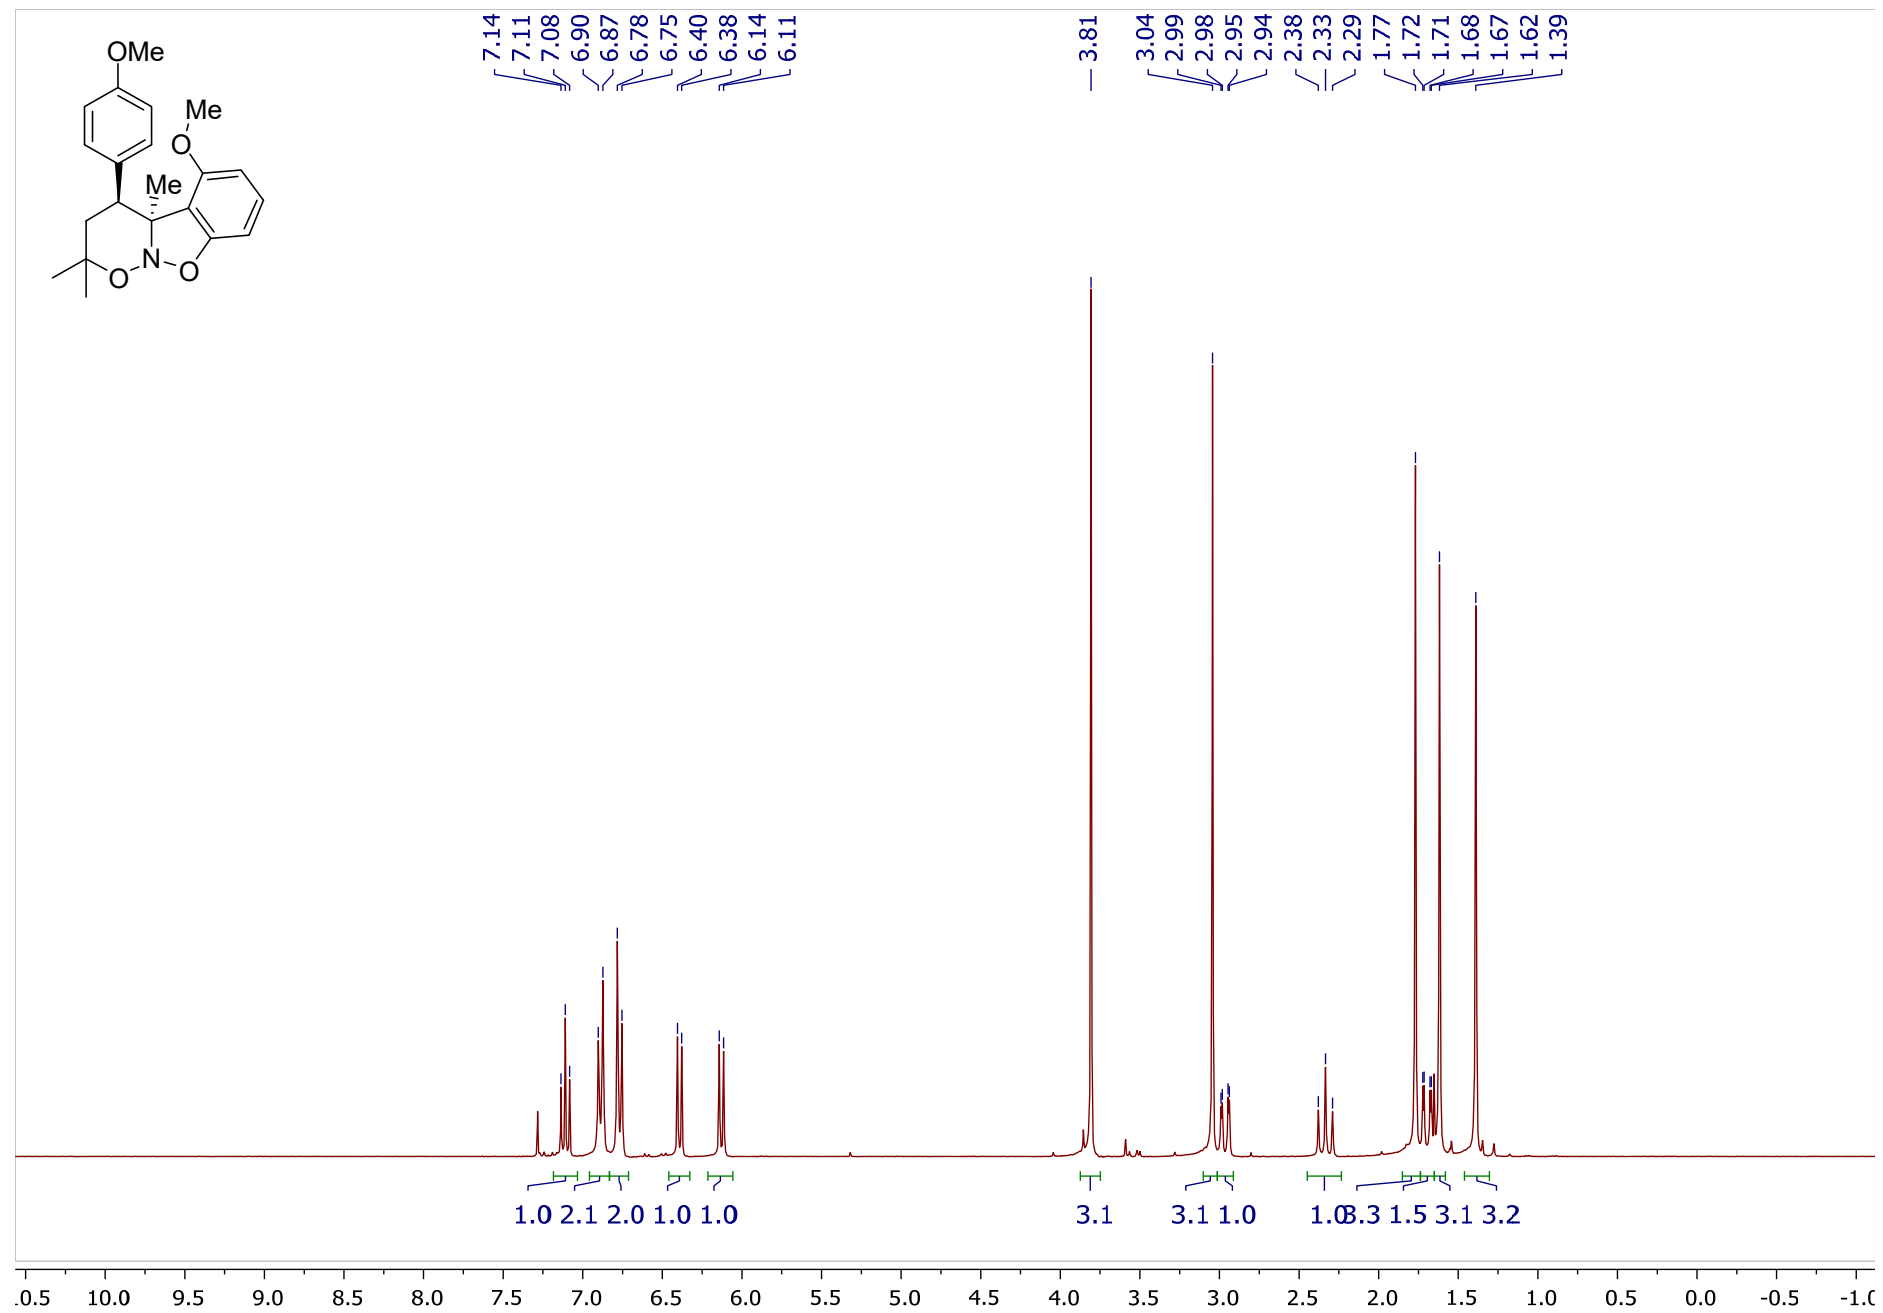

$^{13}\text{C}$  NMR (75 MHz,  $\text{CDCl}_3$ )

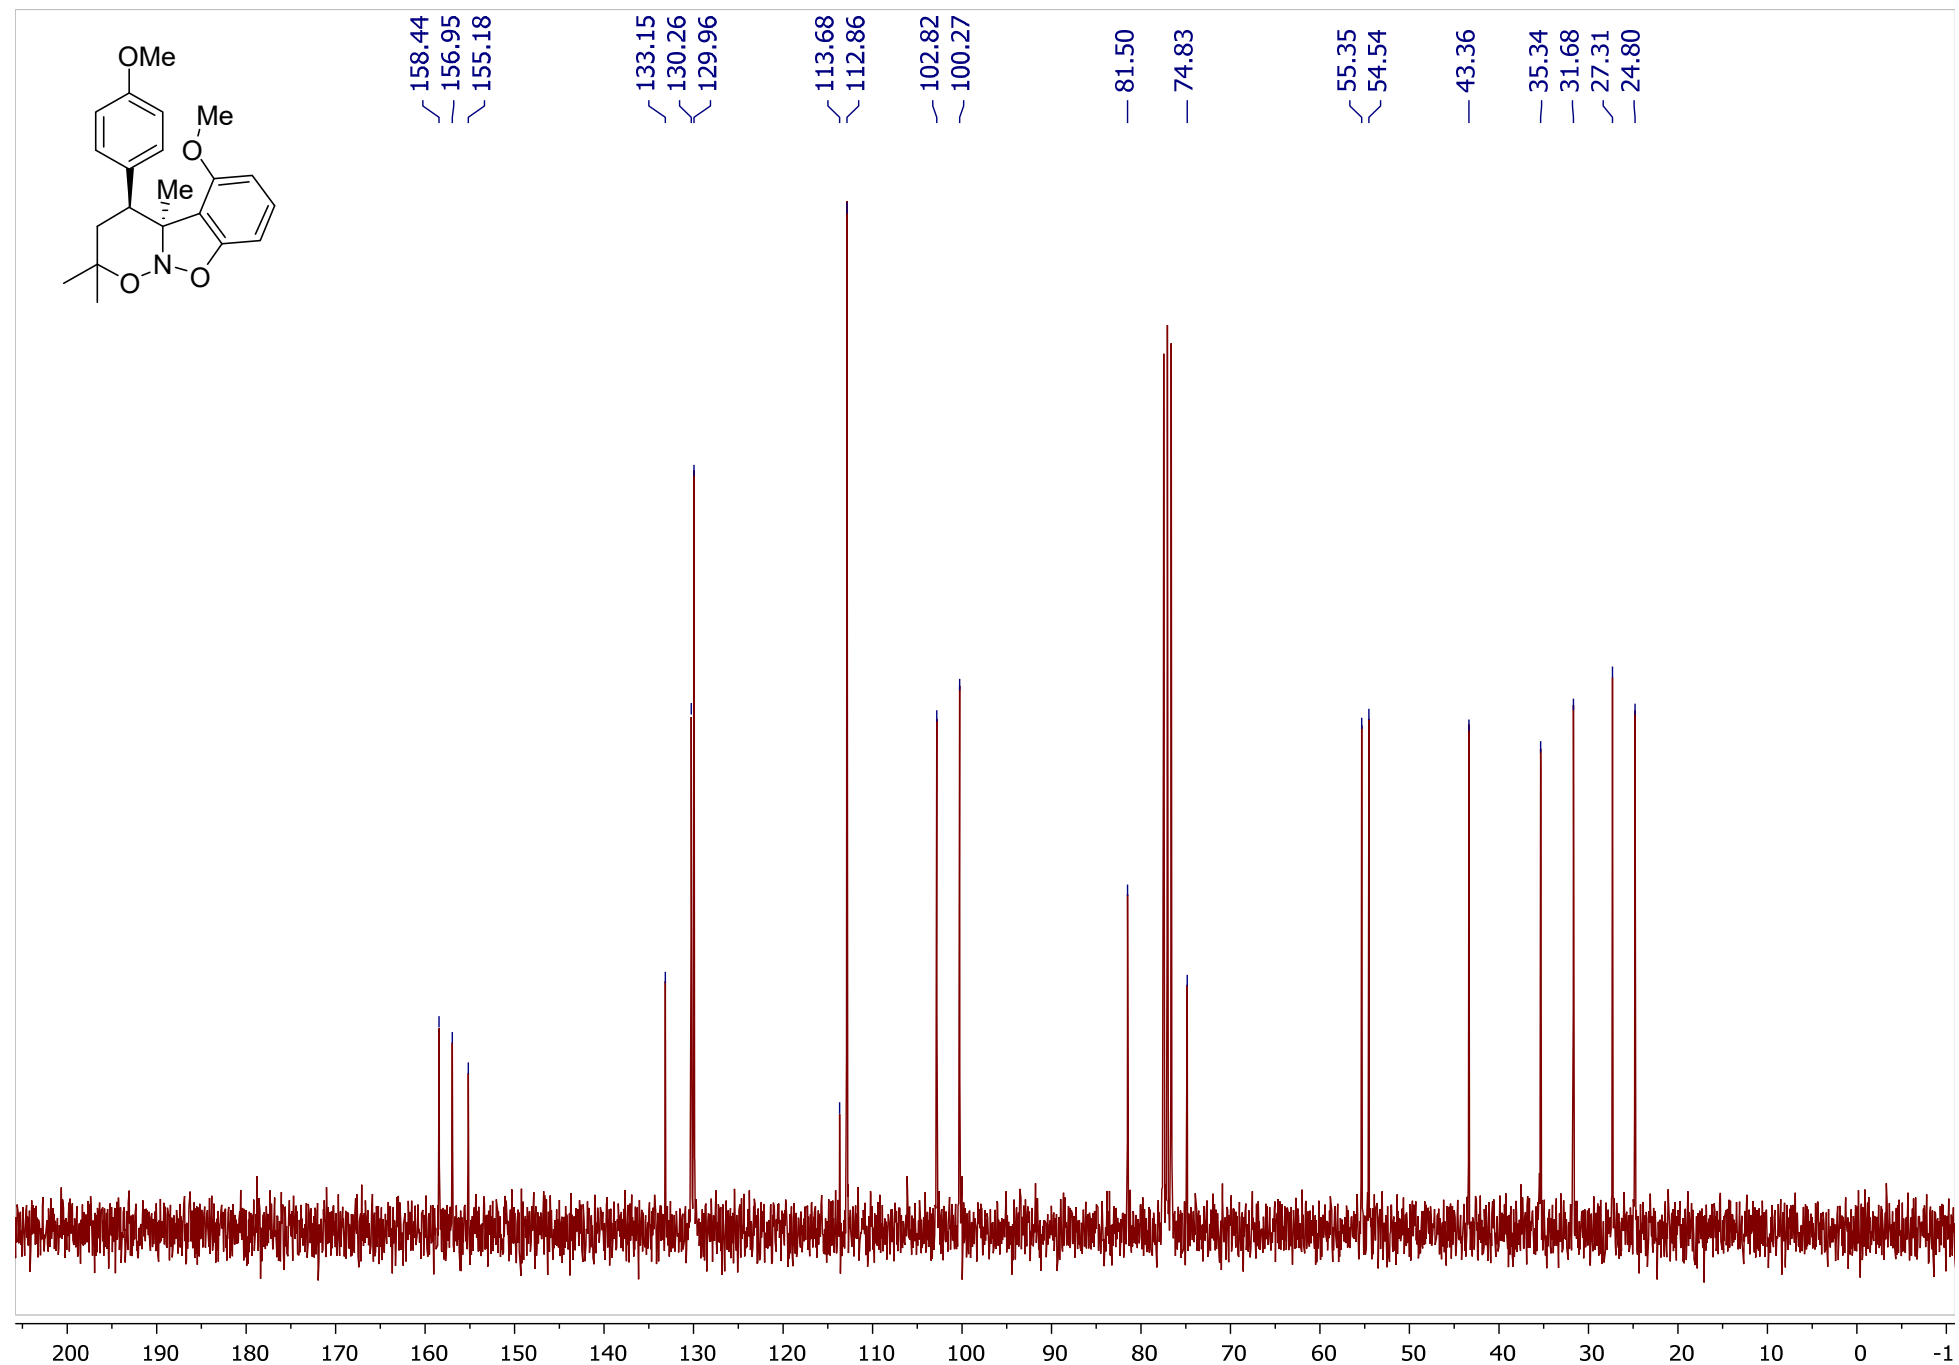





**(4S\*,4aS\*)-5-Methoxy-4-(4-methoxyphenyl)-2,2,4a-trimethyl-2,3,4,4a-tetrahydrobenzo[4,5]isoxazolo[2,3-b][1,2]oxazine 5ab**, major / minor = 2.5:1

<sup>1</sup>H NMR (300 MHz, CDCl<sub>3</sub>)

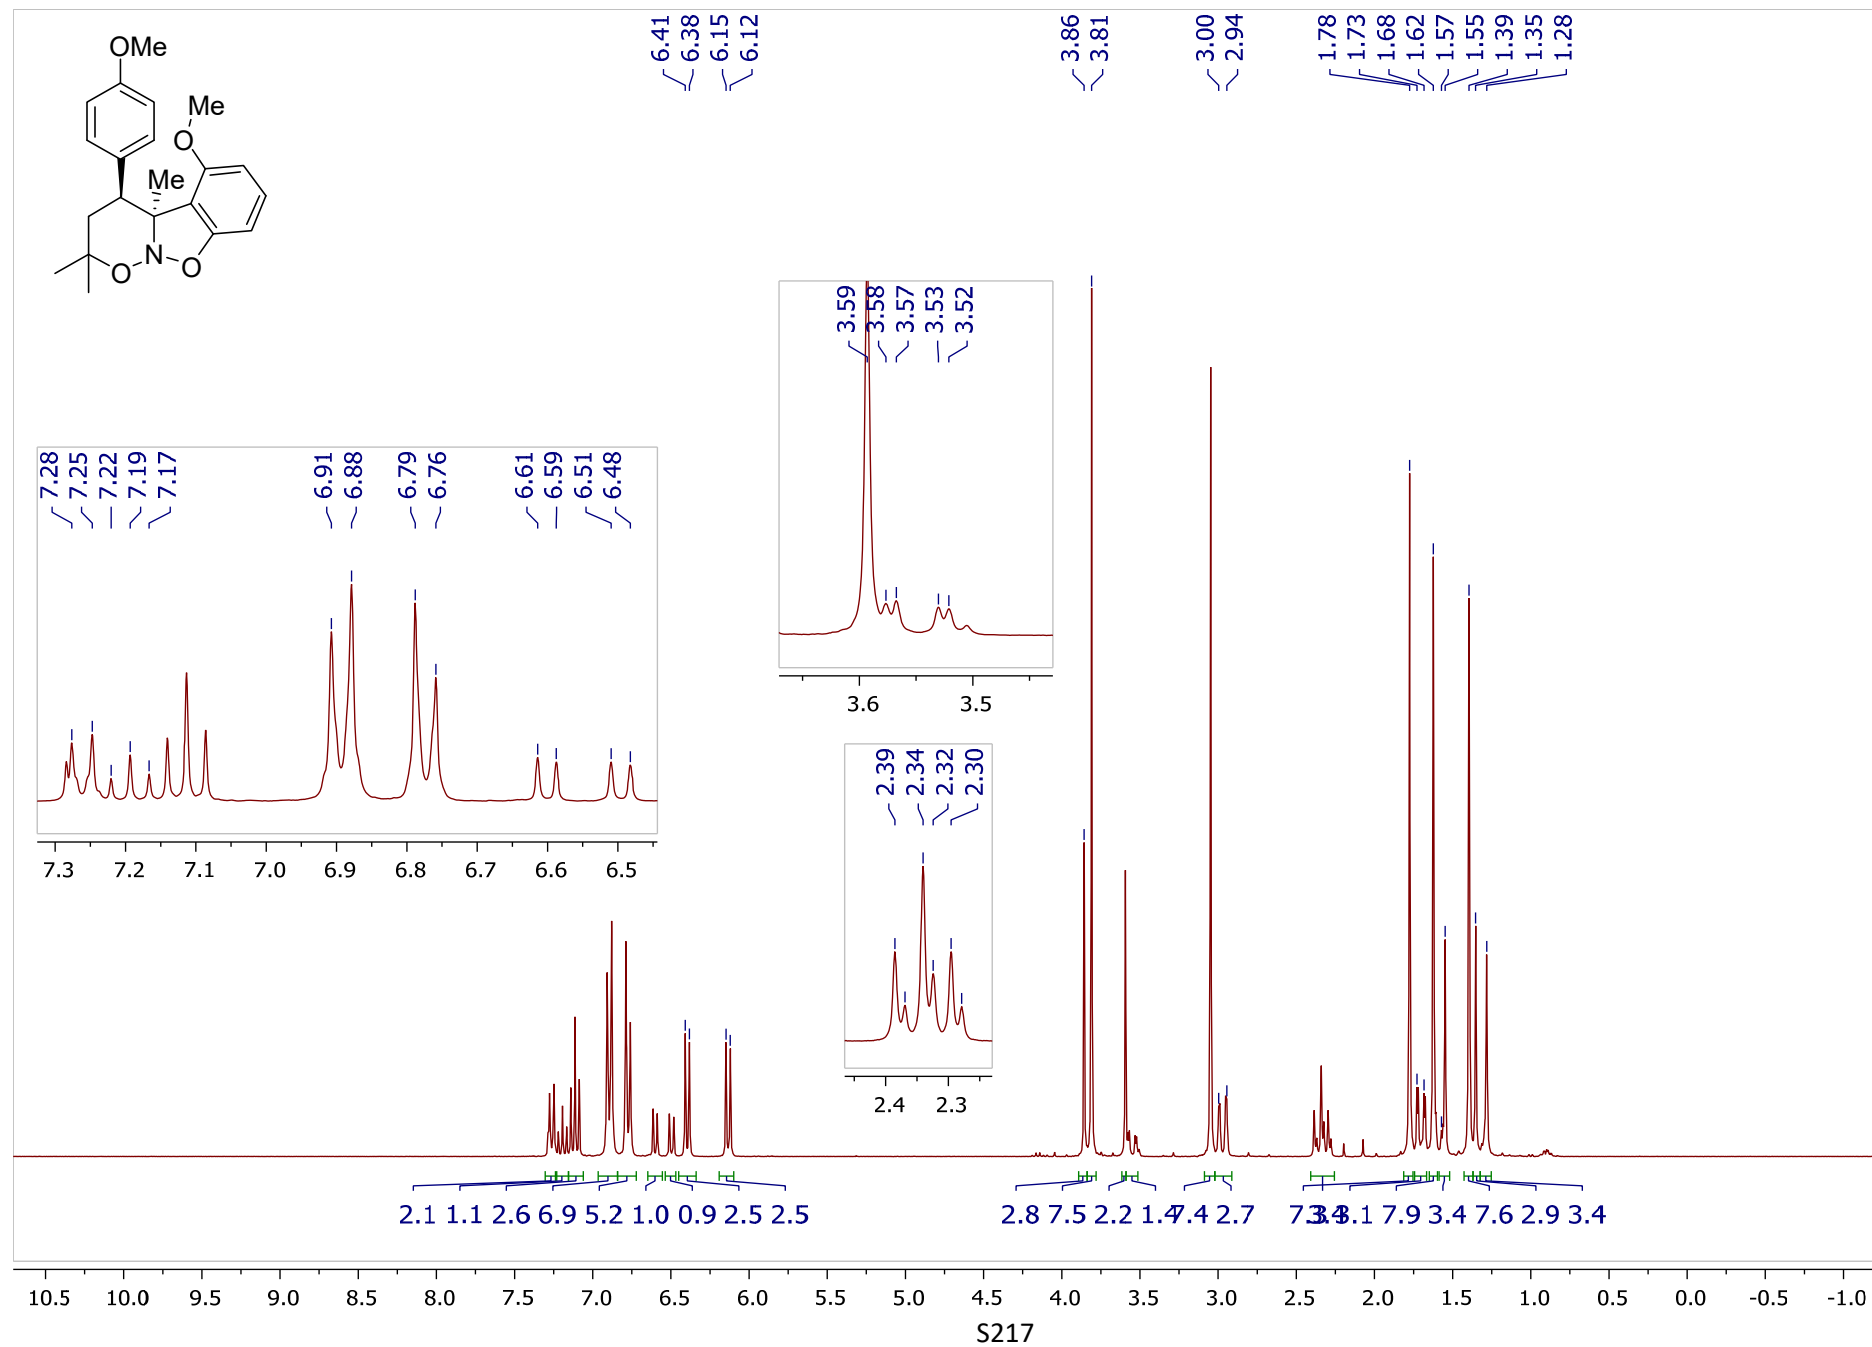

$^{13}\text{C}$  NMR (75 MHz,  $\text{CDCl}_3$ )

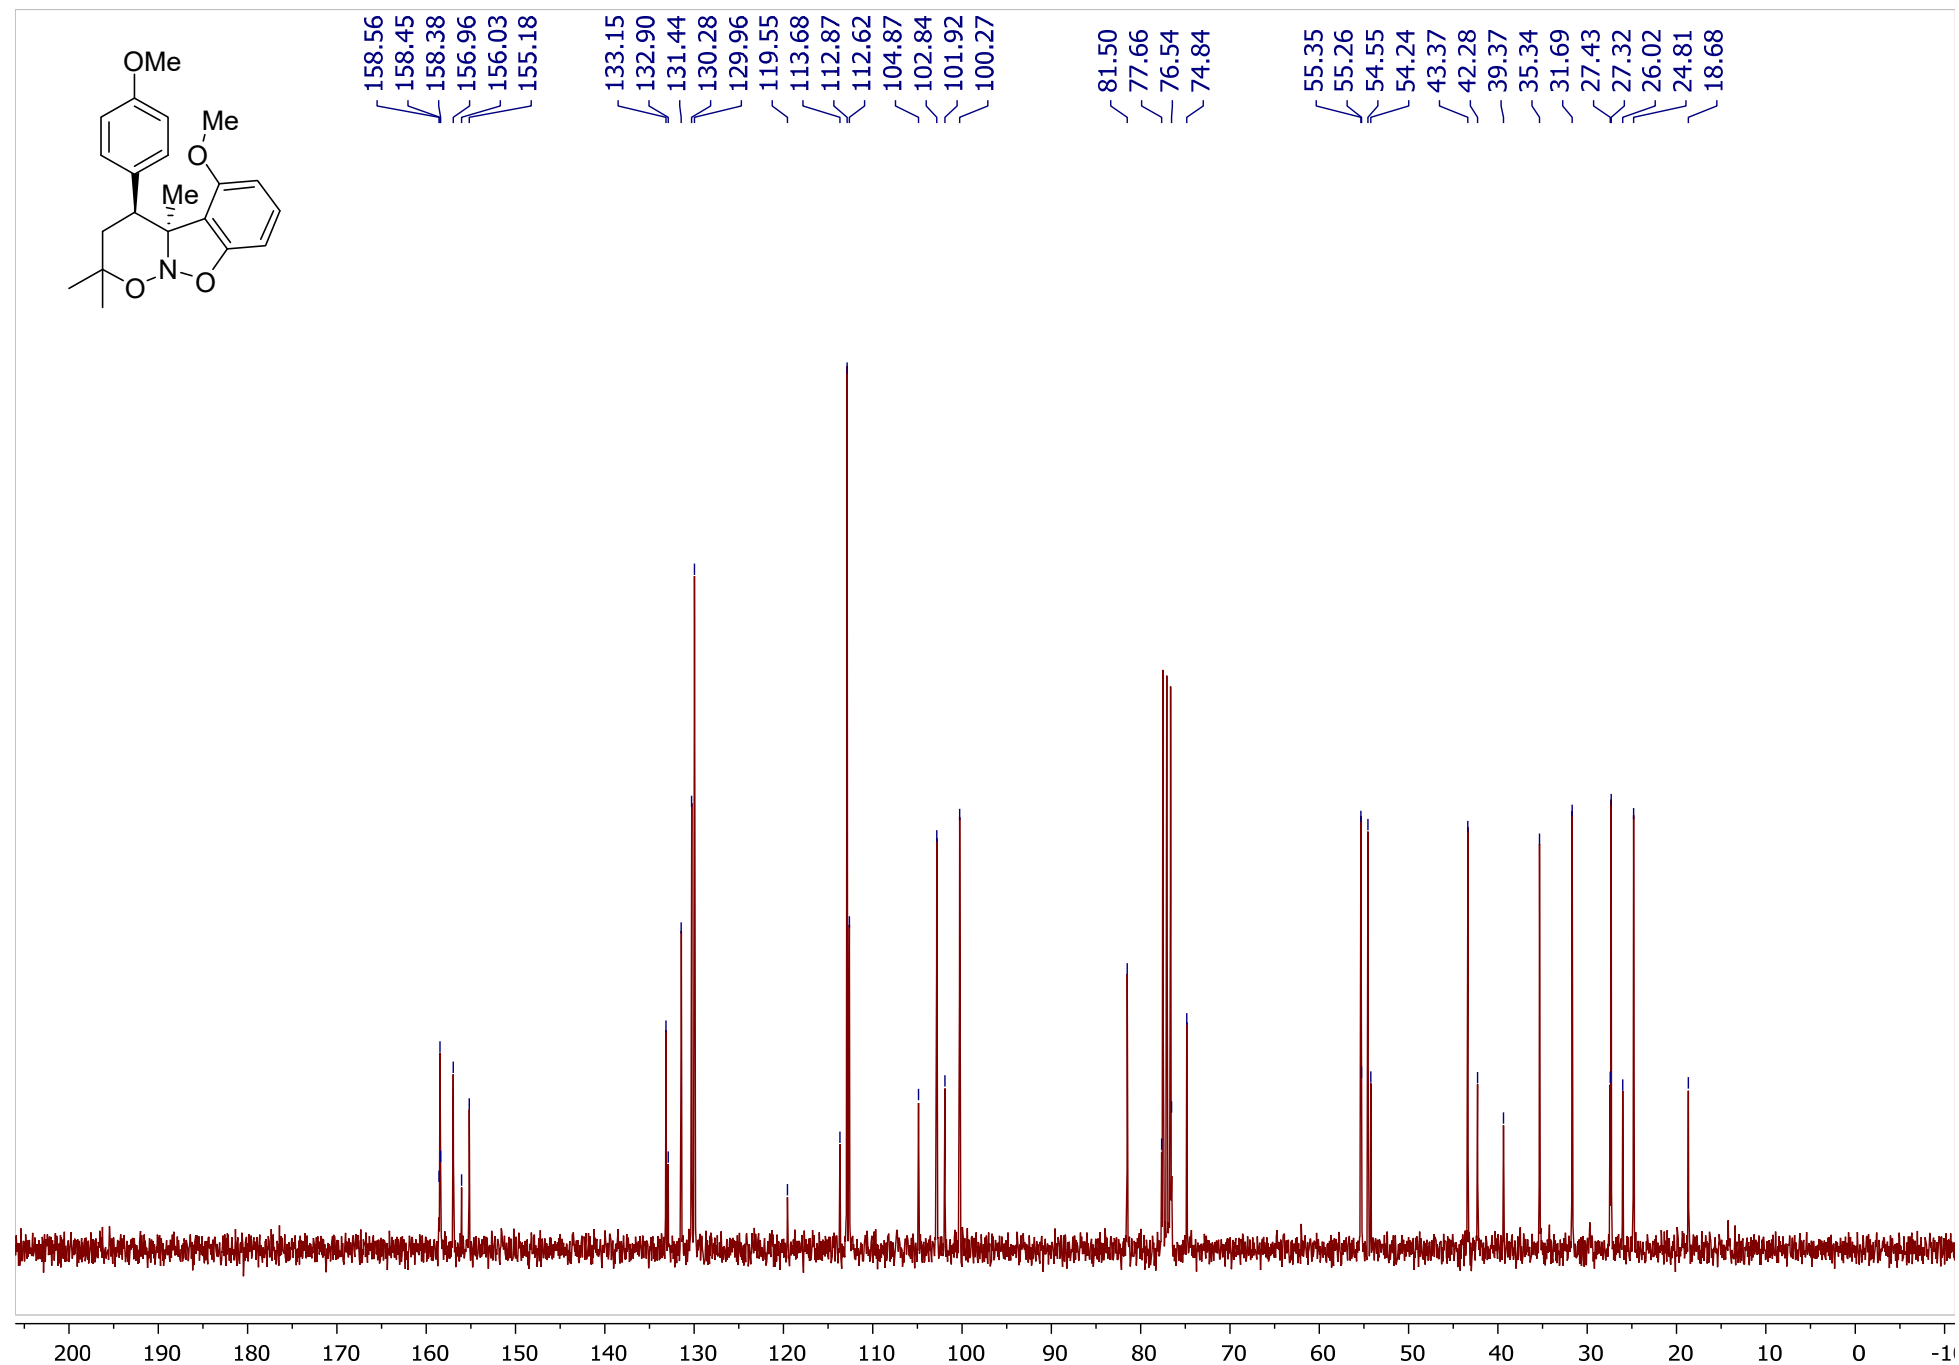

$^1\text{H}$ - $^1\text{H}$  COSY

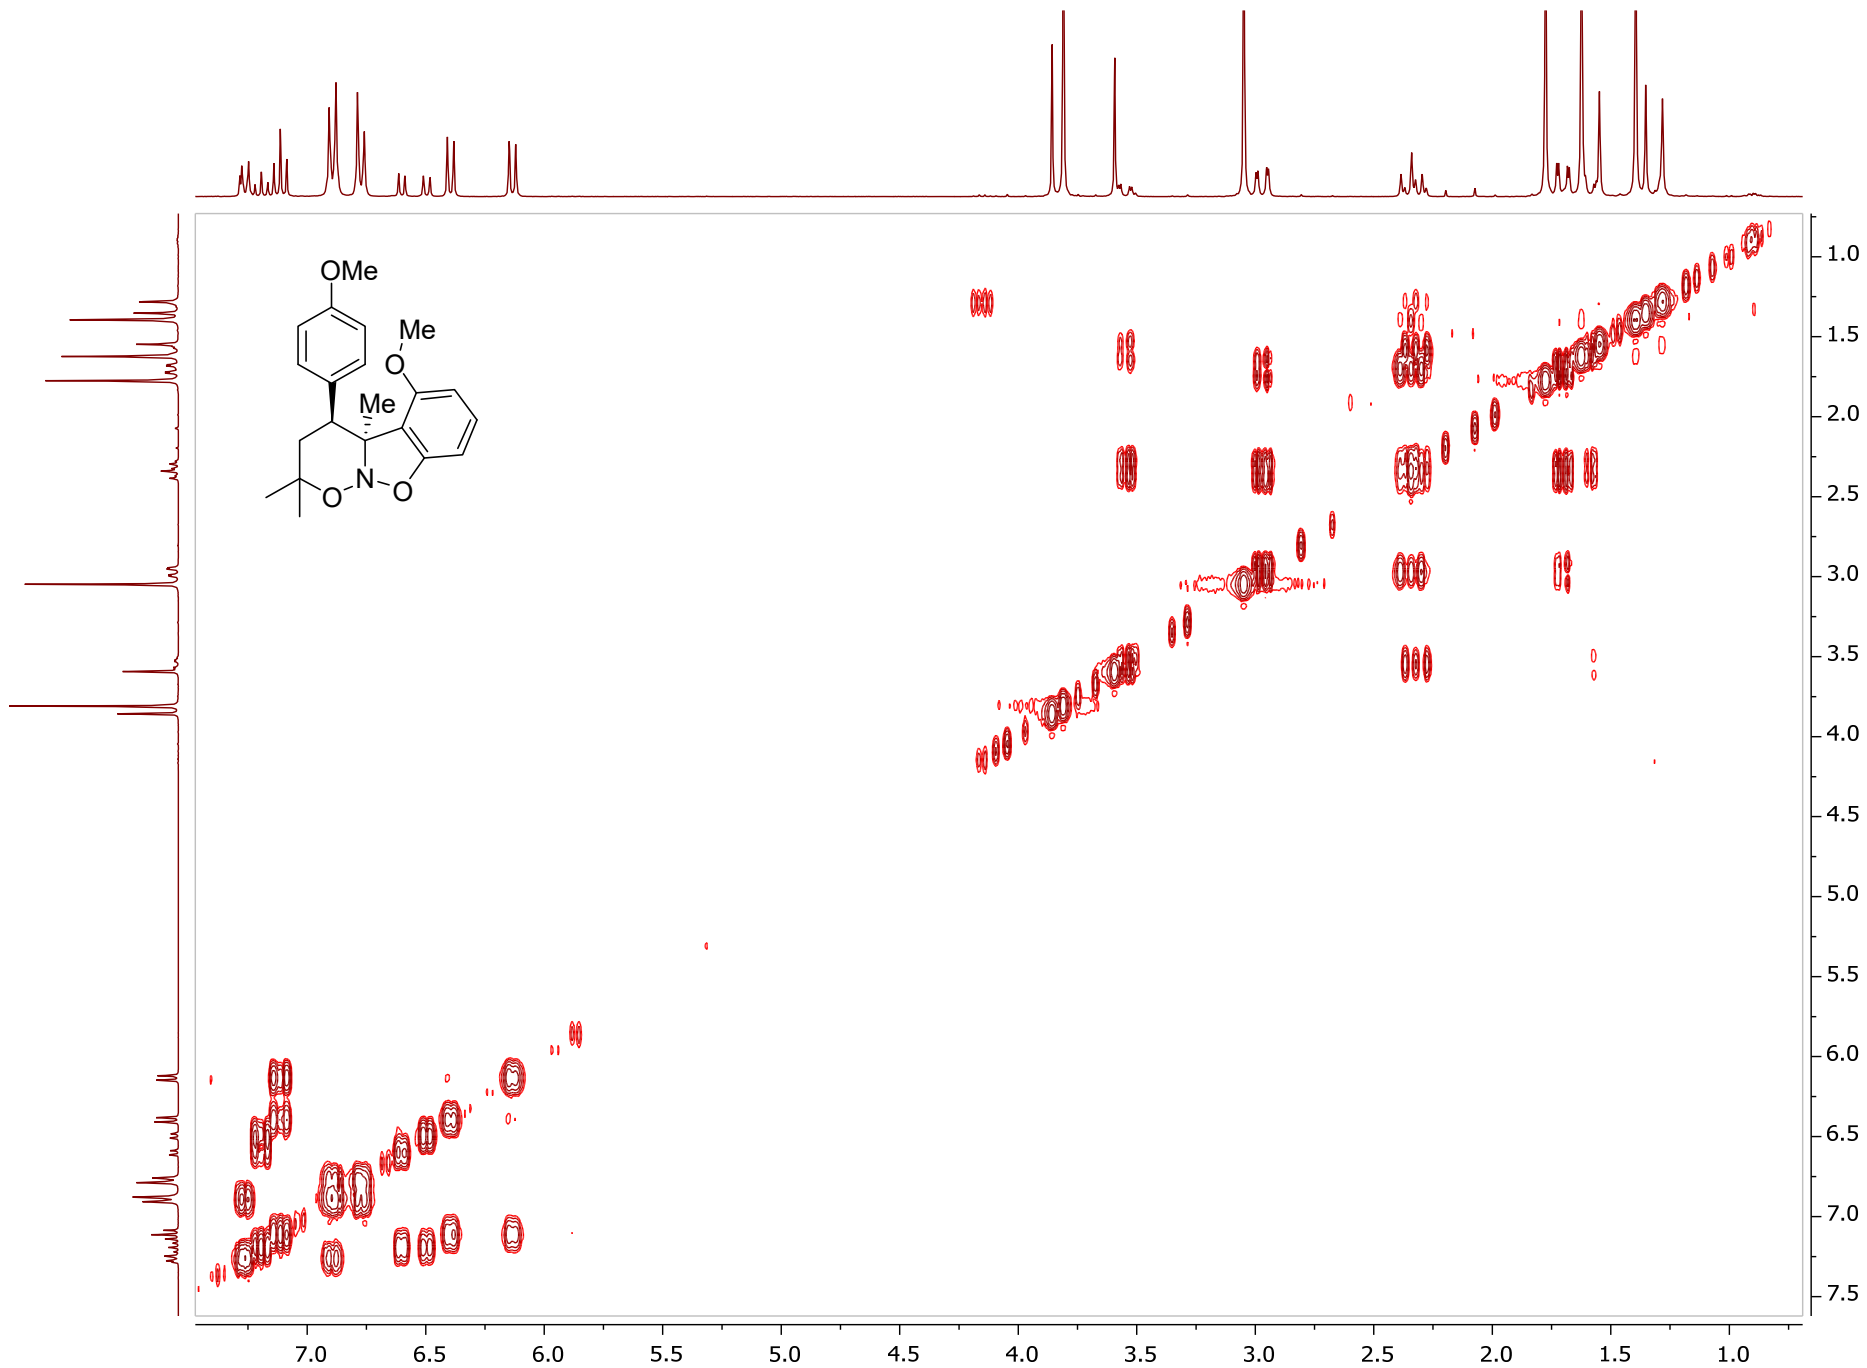

$^1\text{H}$ - $^{13}\text{C}$  HSQC

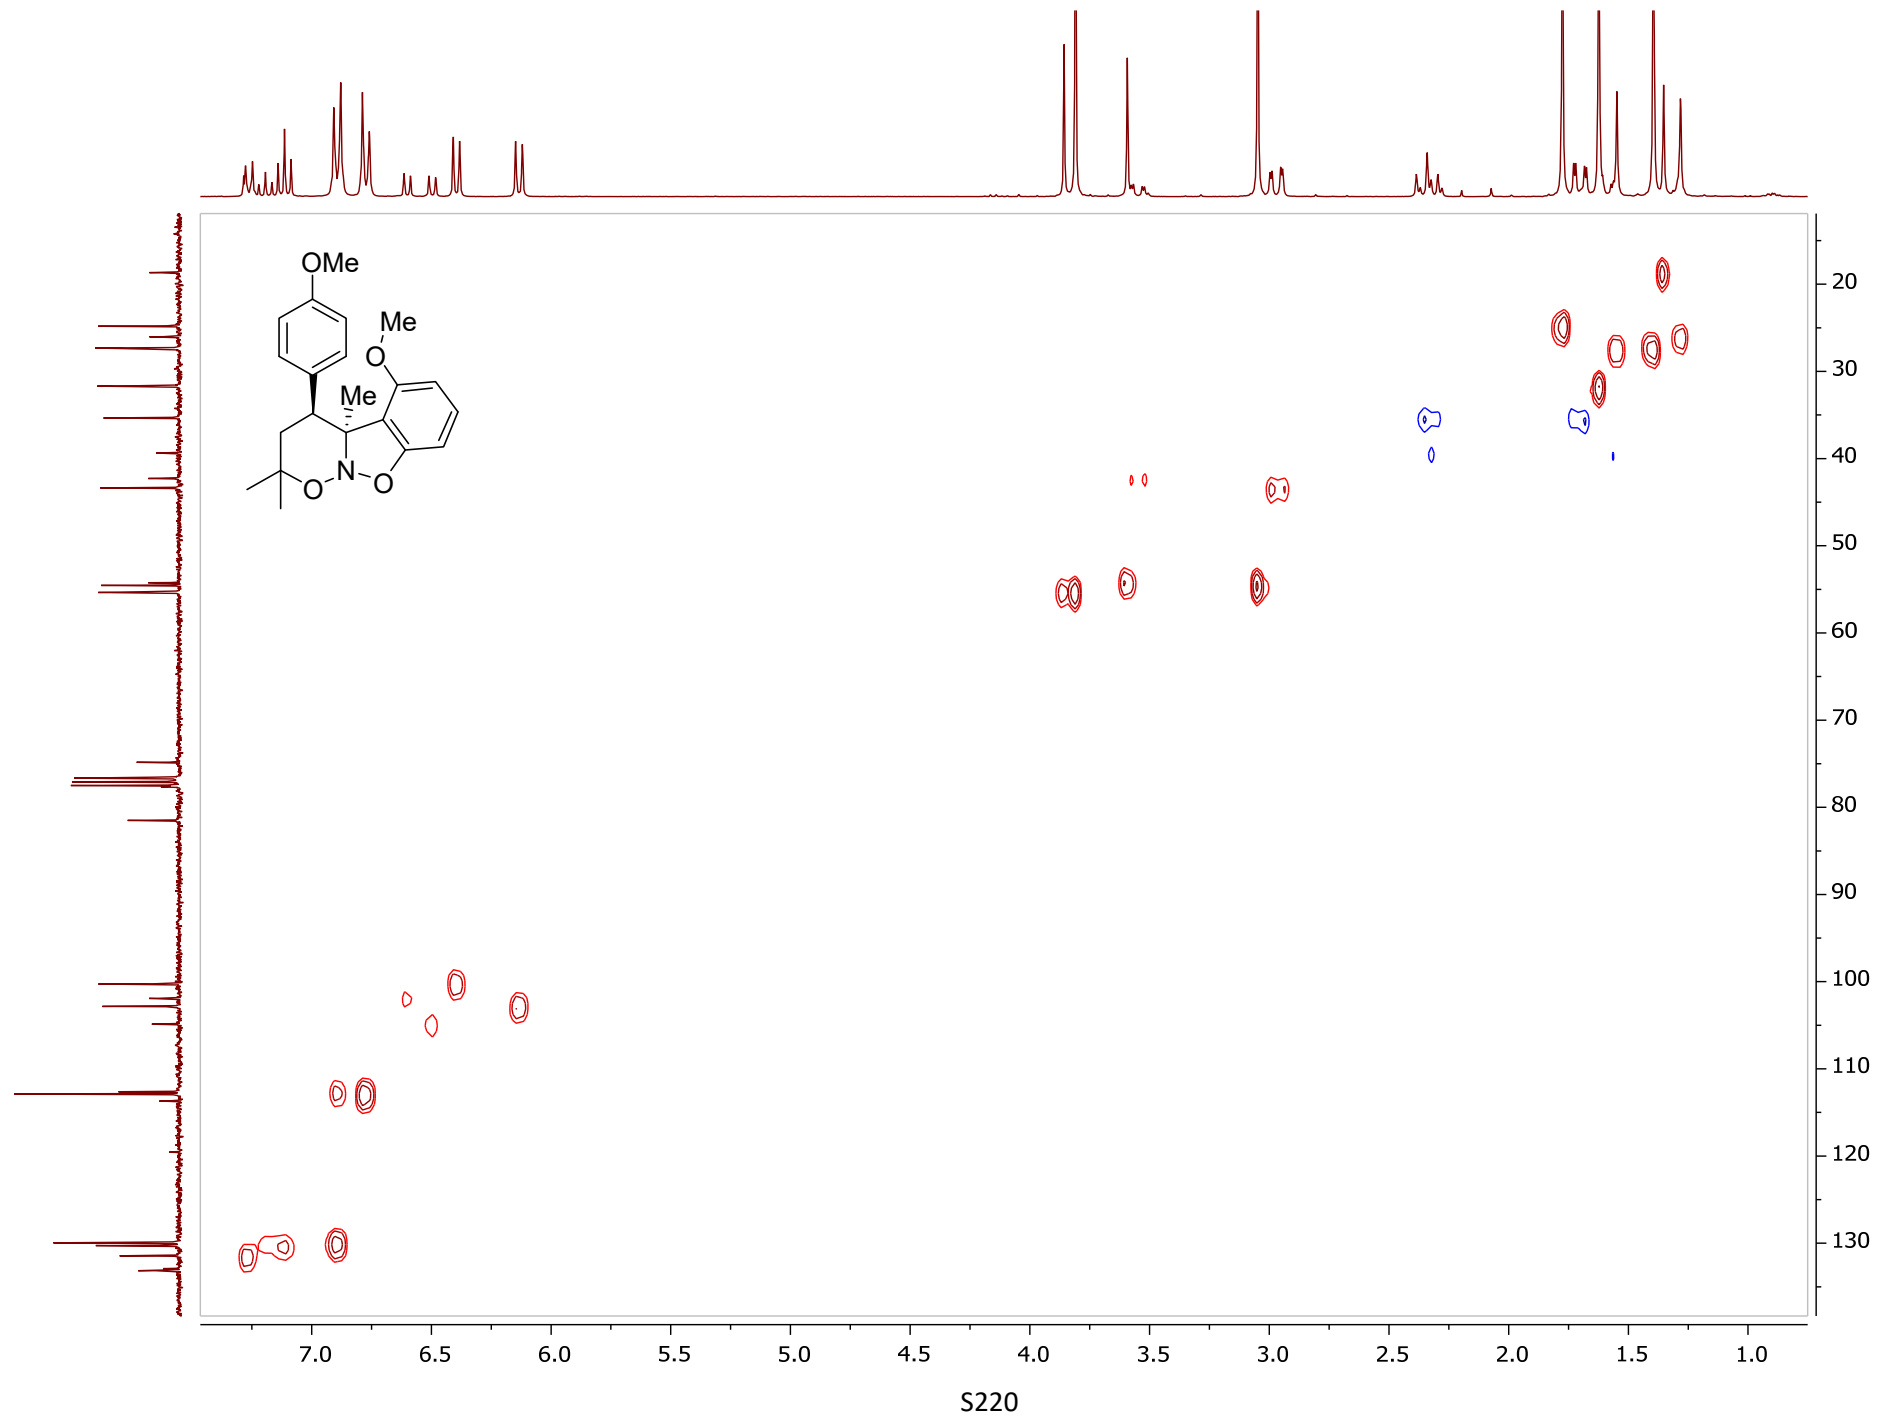

$^1\text{H}$ - $^{13}\text{C}$  HMBC

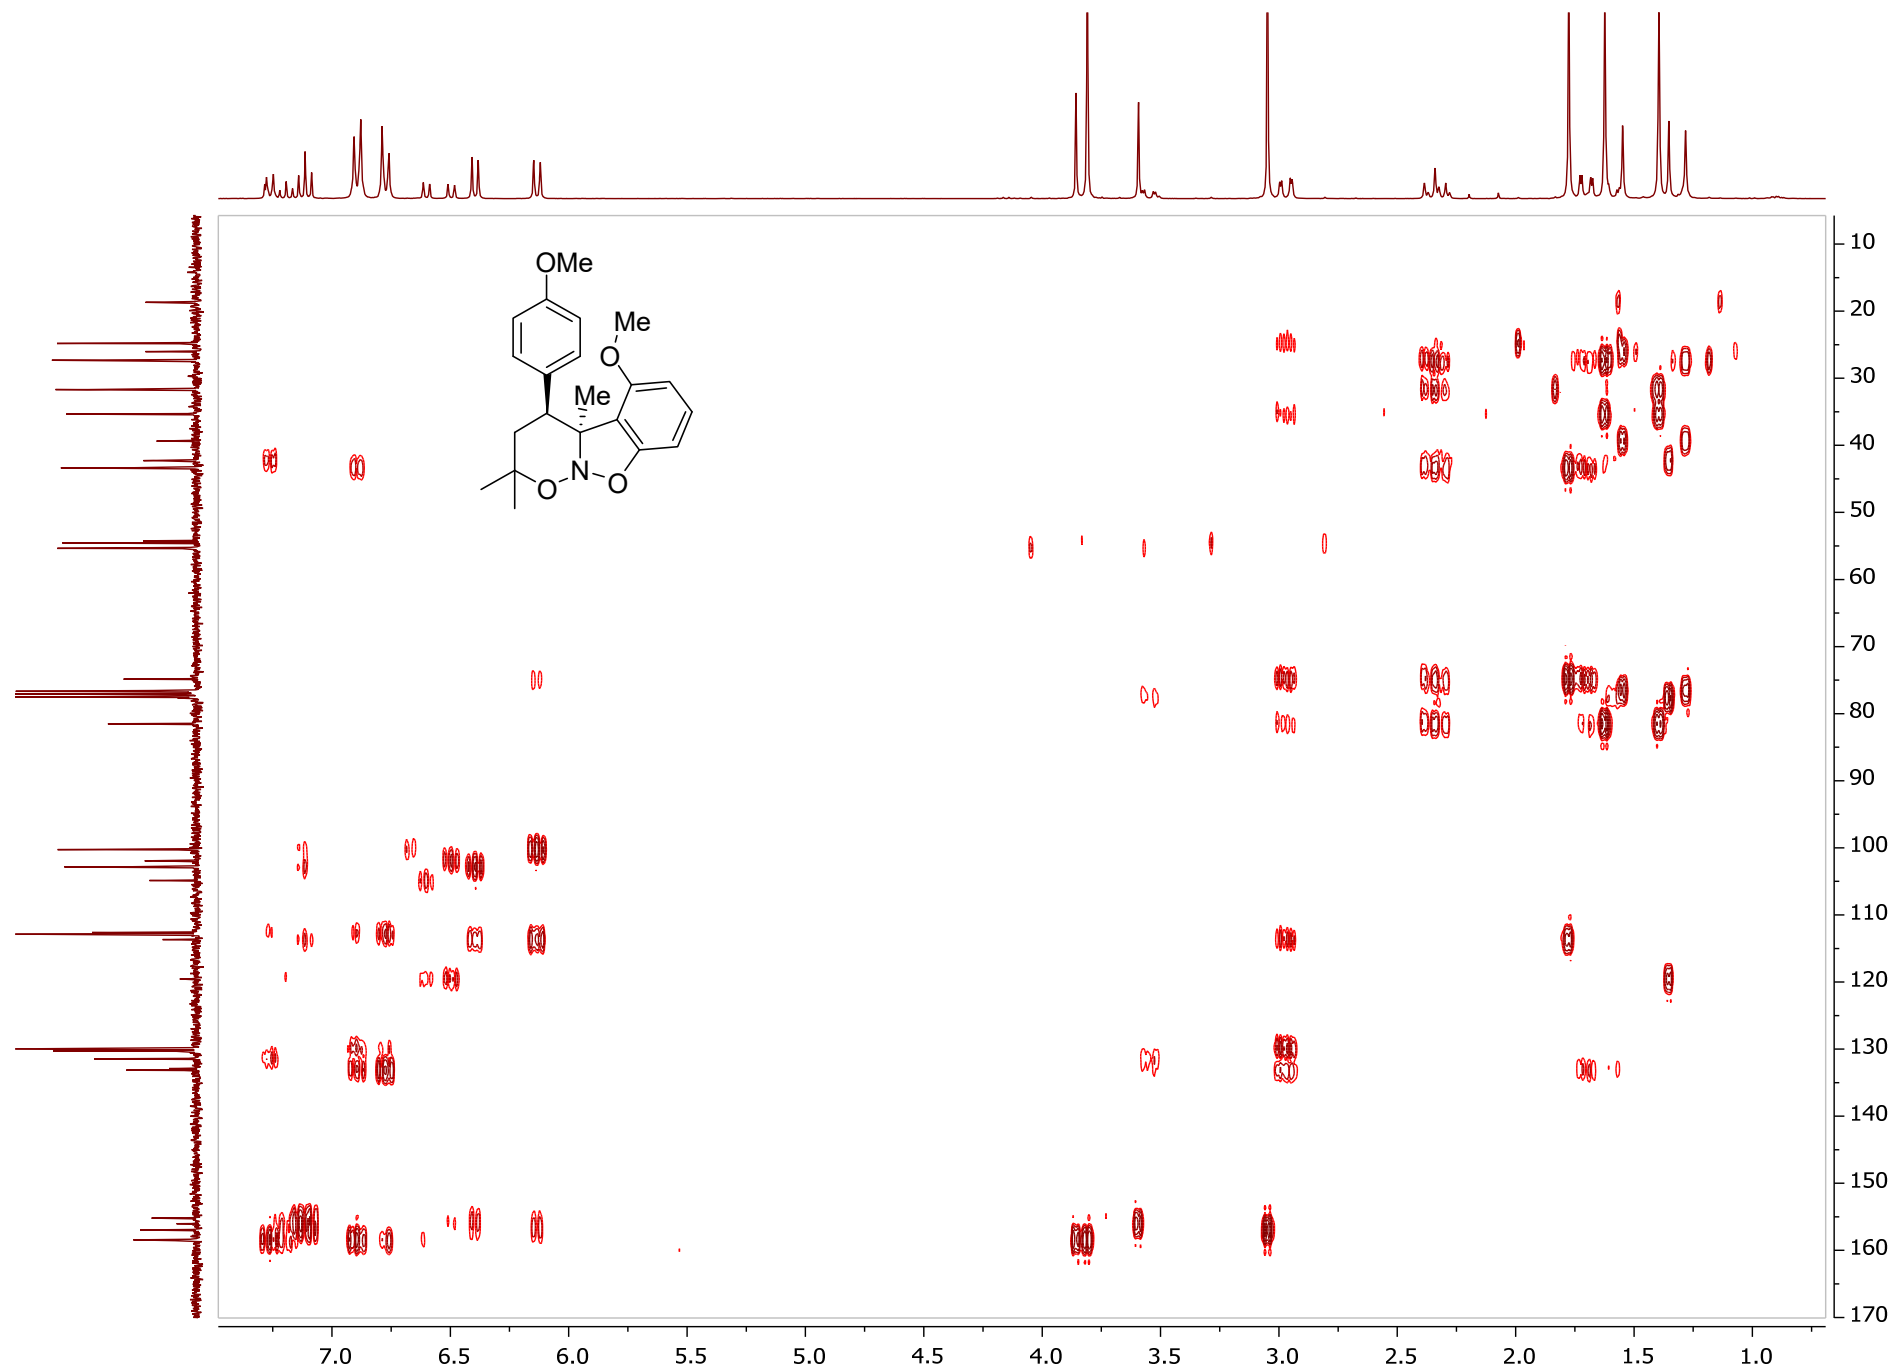

S221

$^1\text{H}$ - $^1\text{H}$  NOESY

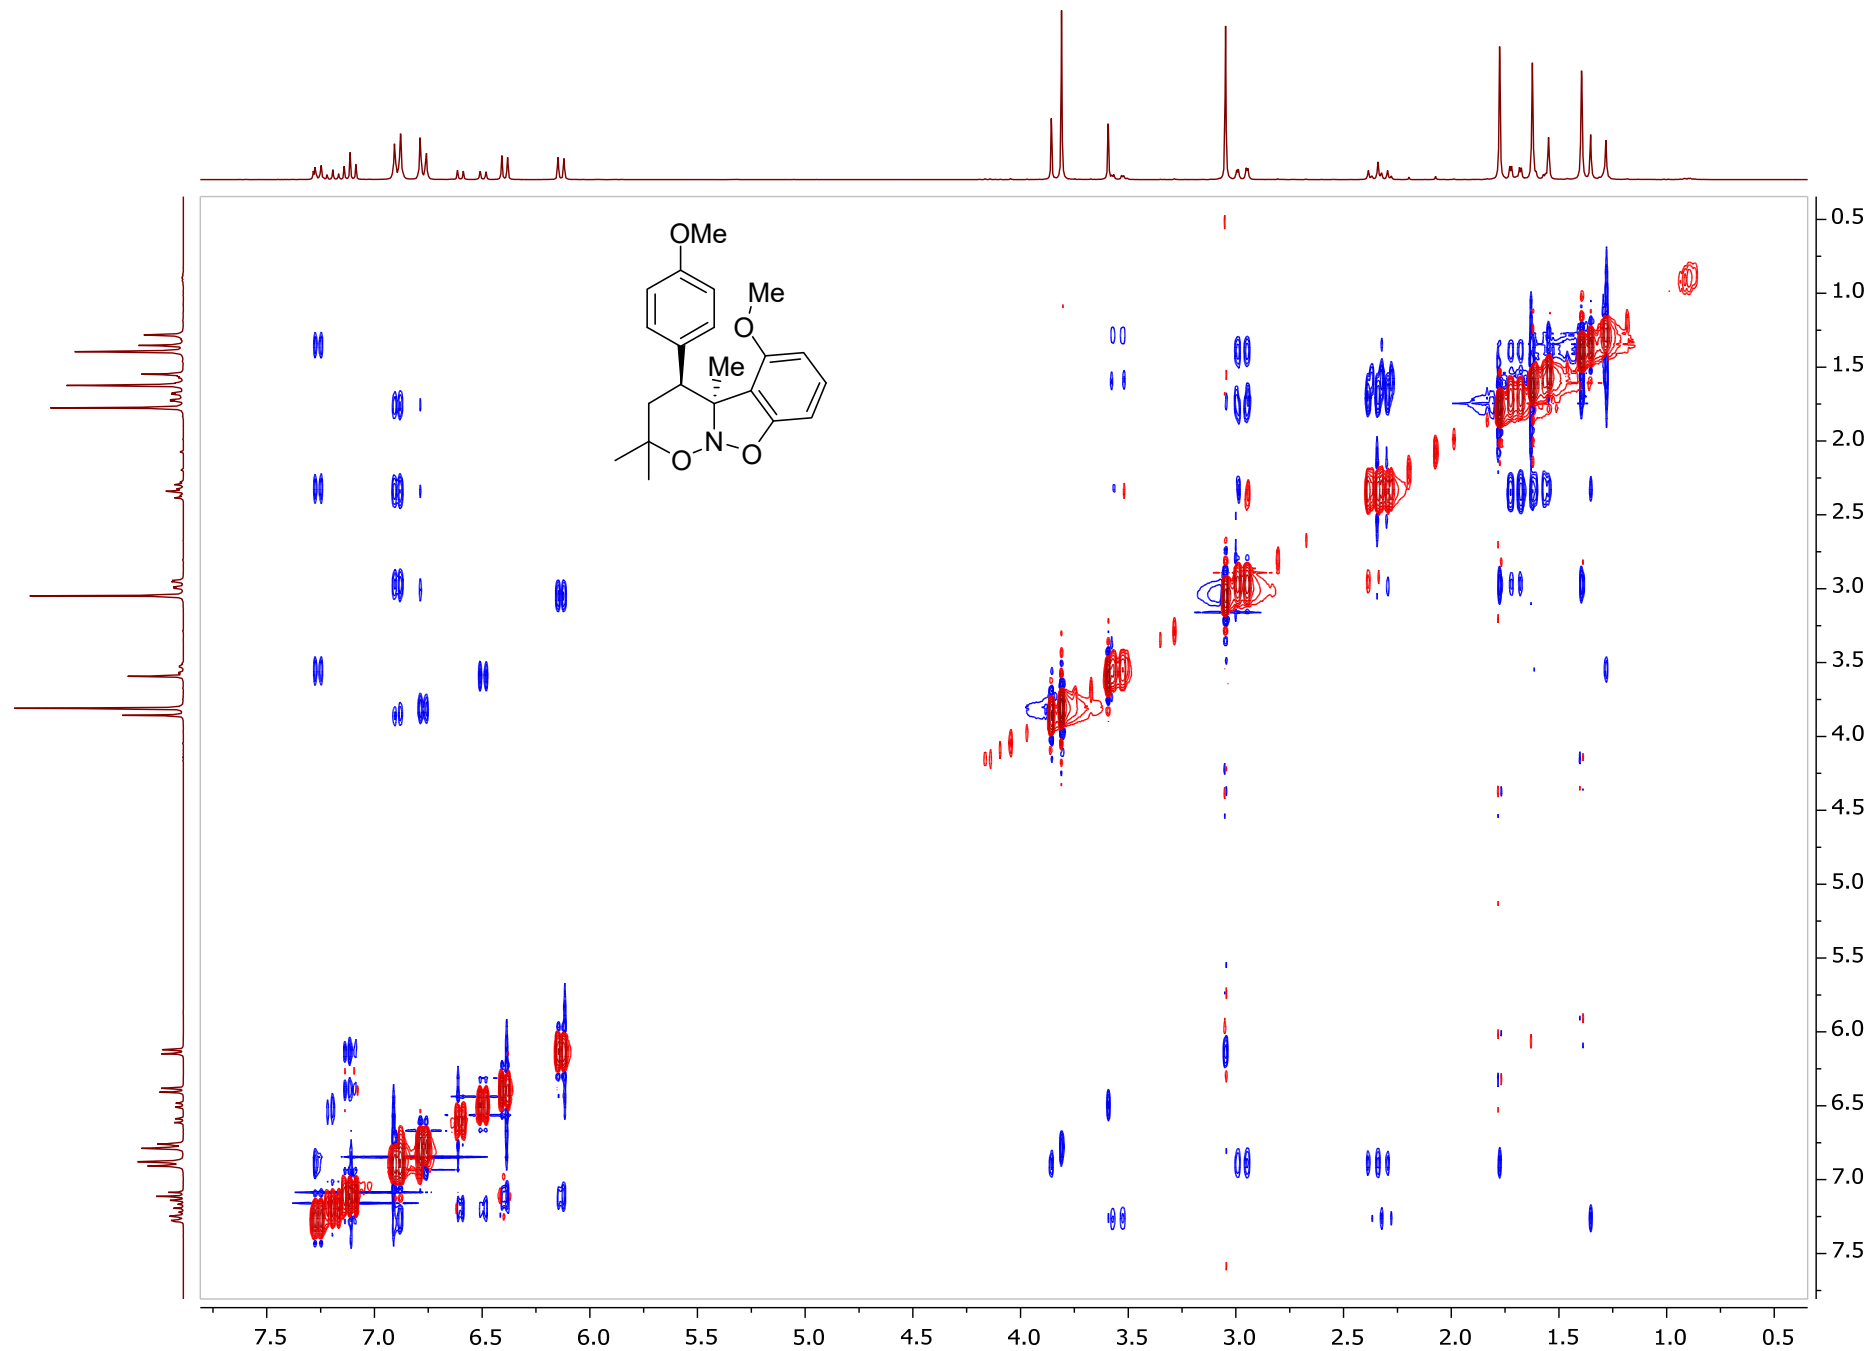

**(4*S*\*,4*aS*\*)- 4-(4-Methoxyphenyl)-2,2,4*a*-trimethyl-5-morpholino-2,3,4,4*a*-tetrahydrobenzo[4,5]isoxazolo[2,3-*b*][1,2]oxazine 5ac, major isomer**

<sup>1</sup>H NMR (300 MHz, 323K, CDCl<sub>3</sub>)

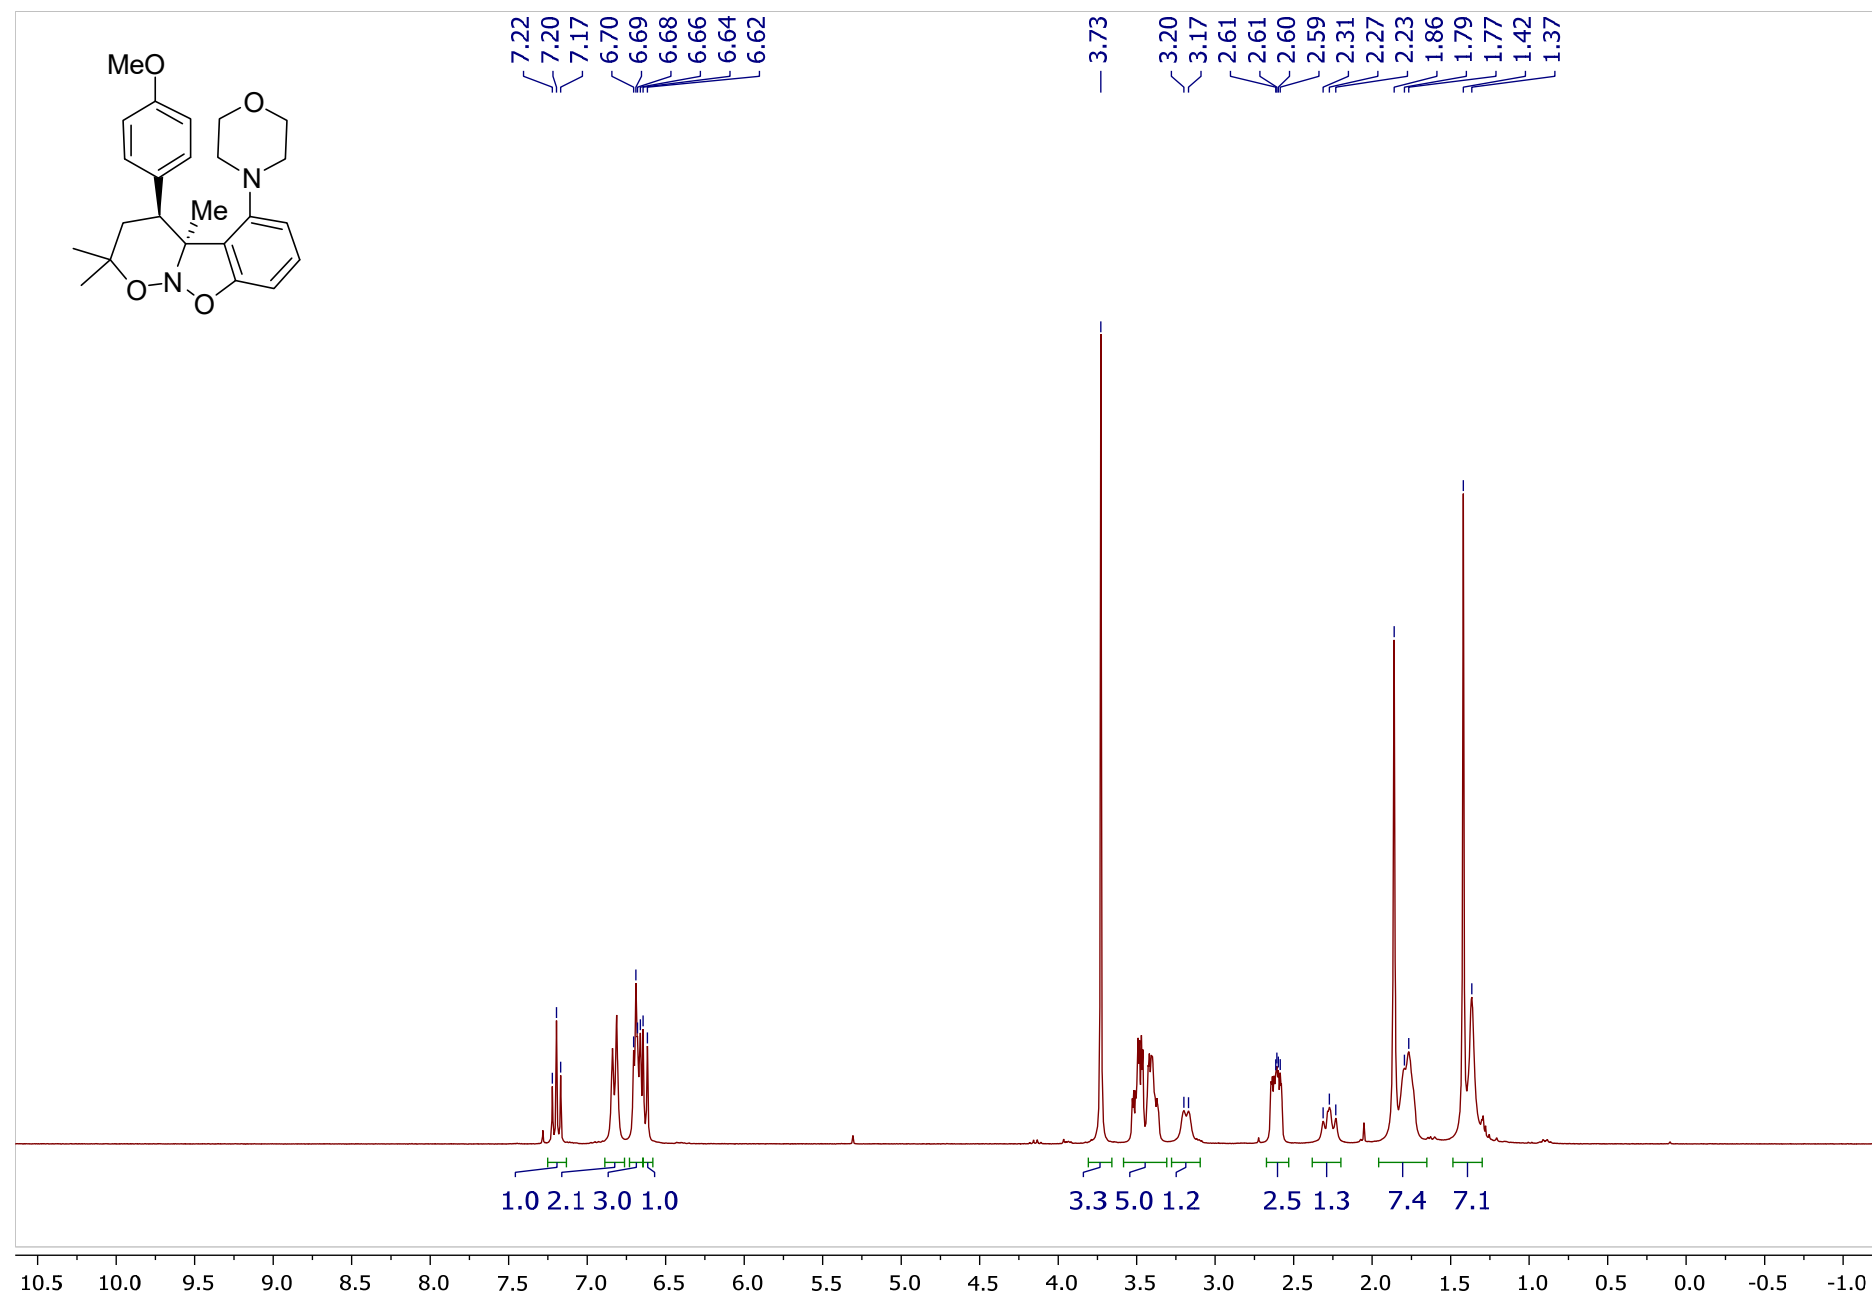

$^{13}\text{C}$  NMR (75 MHz, 323K,  $\text{CDCl}_3$ )

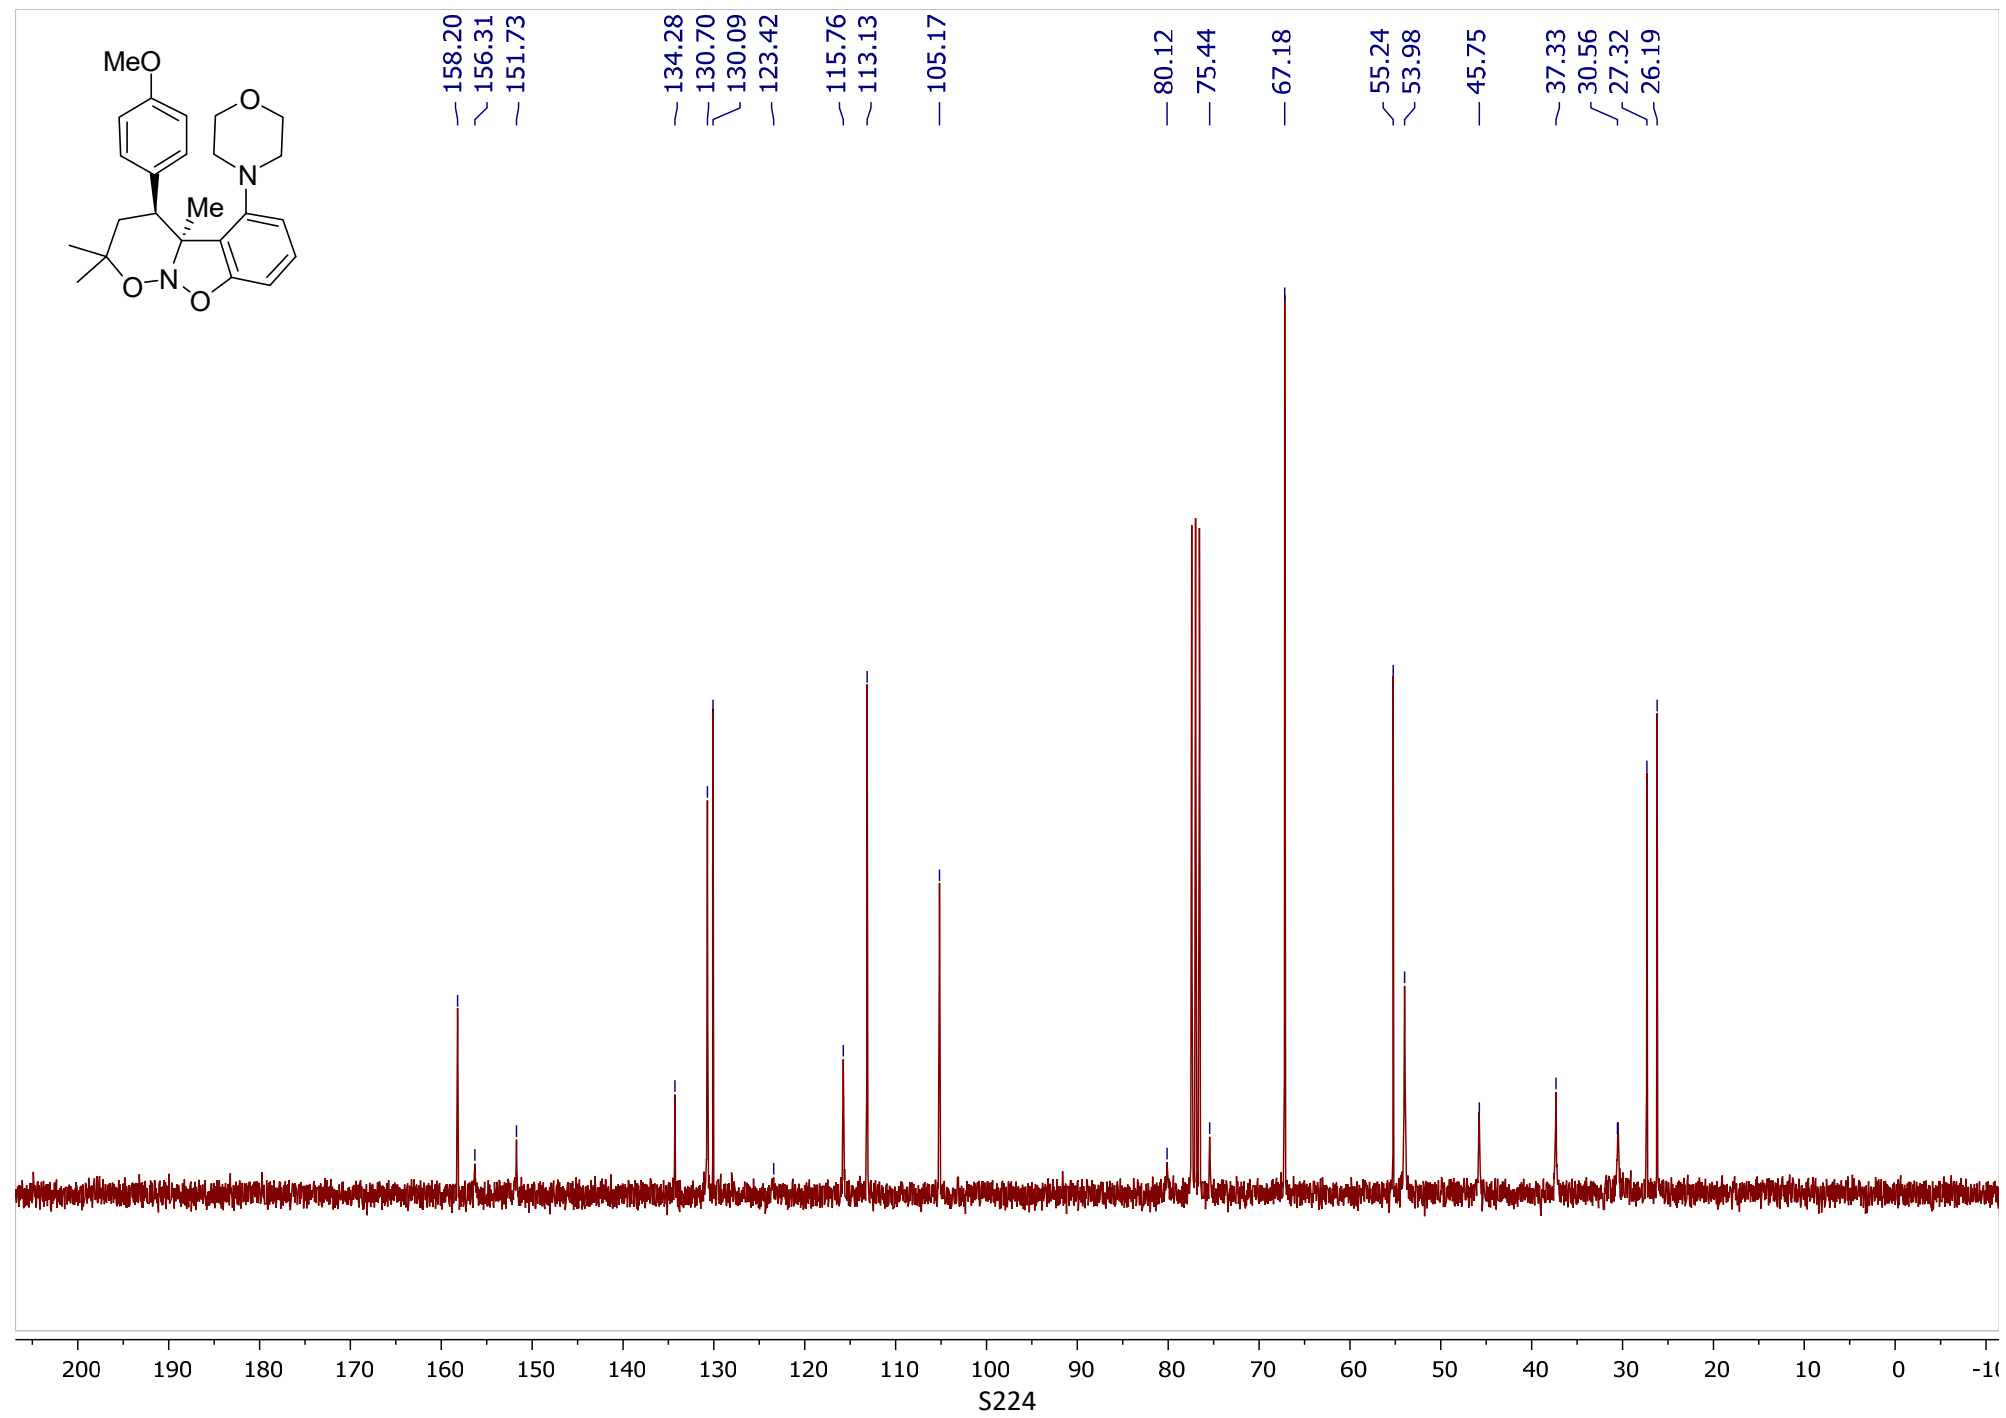



$^{13}\text{C}$  DEPT 135 (75 MHz, 323K,  $\text{CDCl}_3$ )

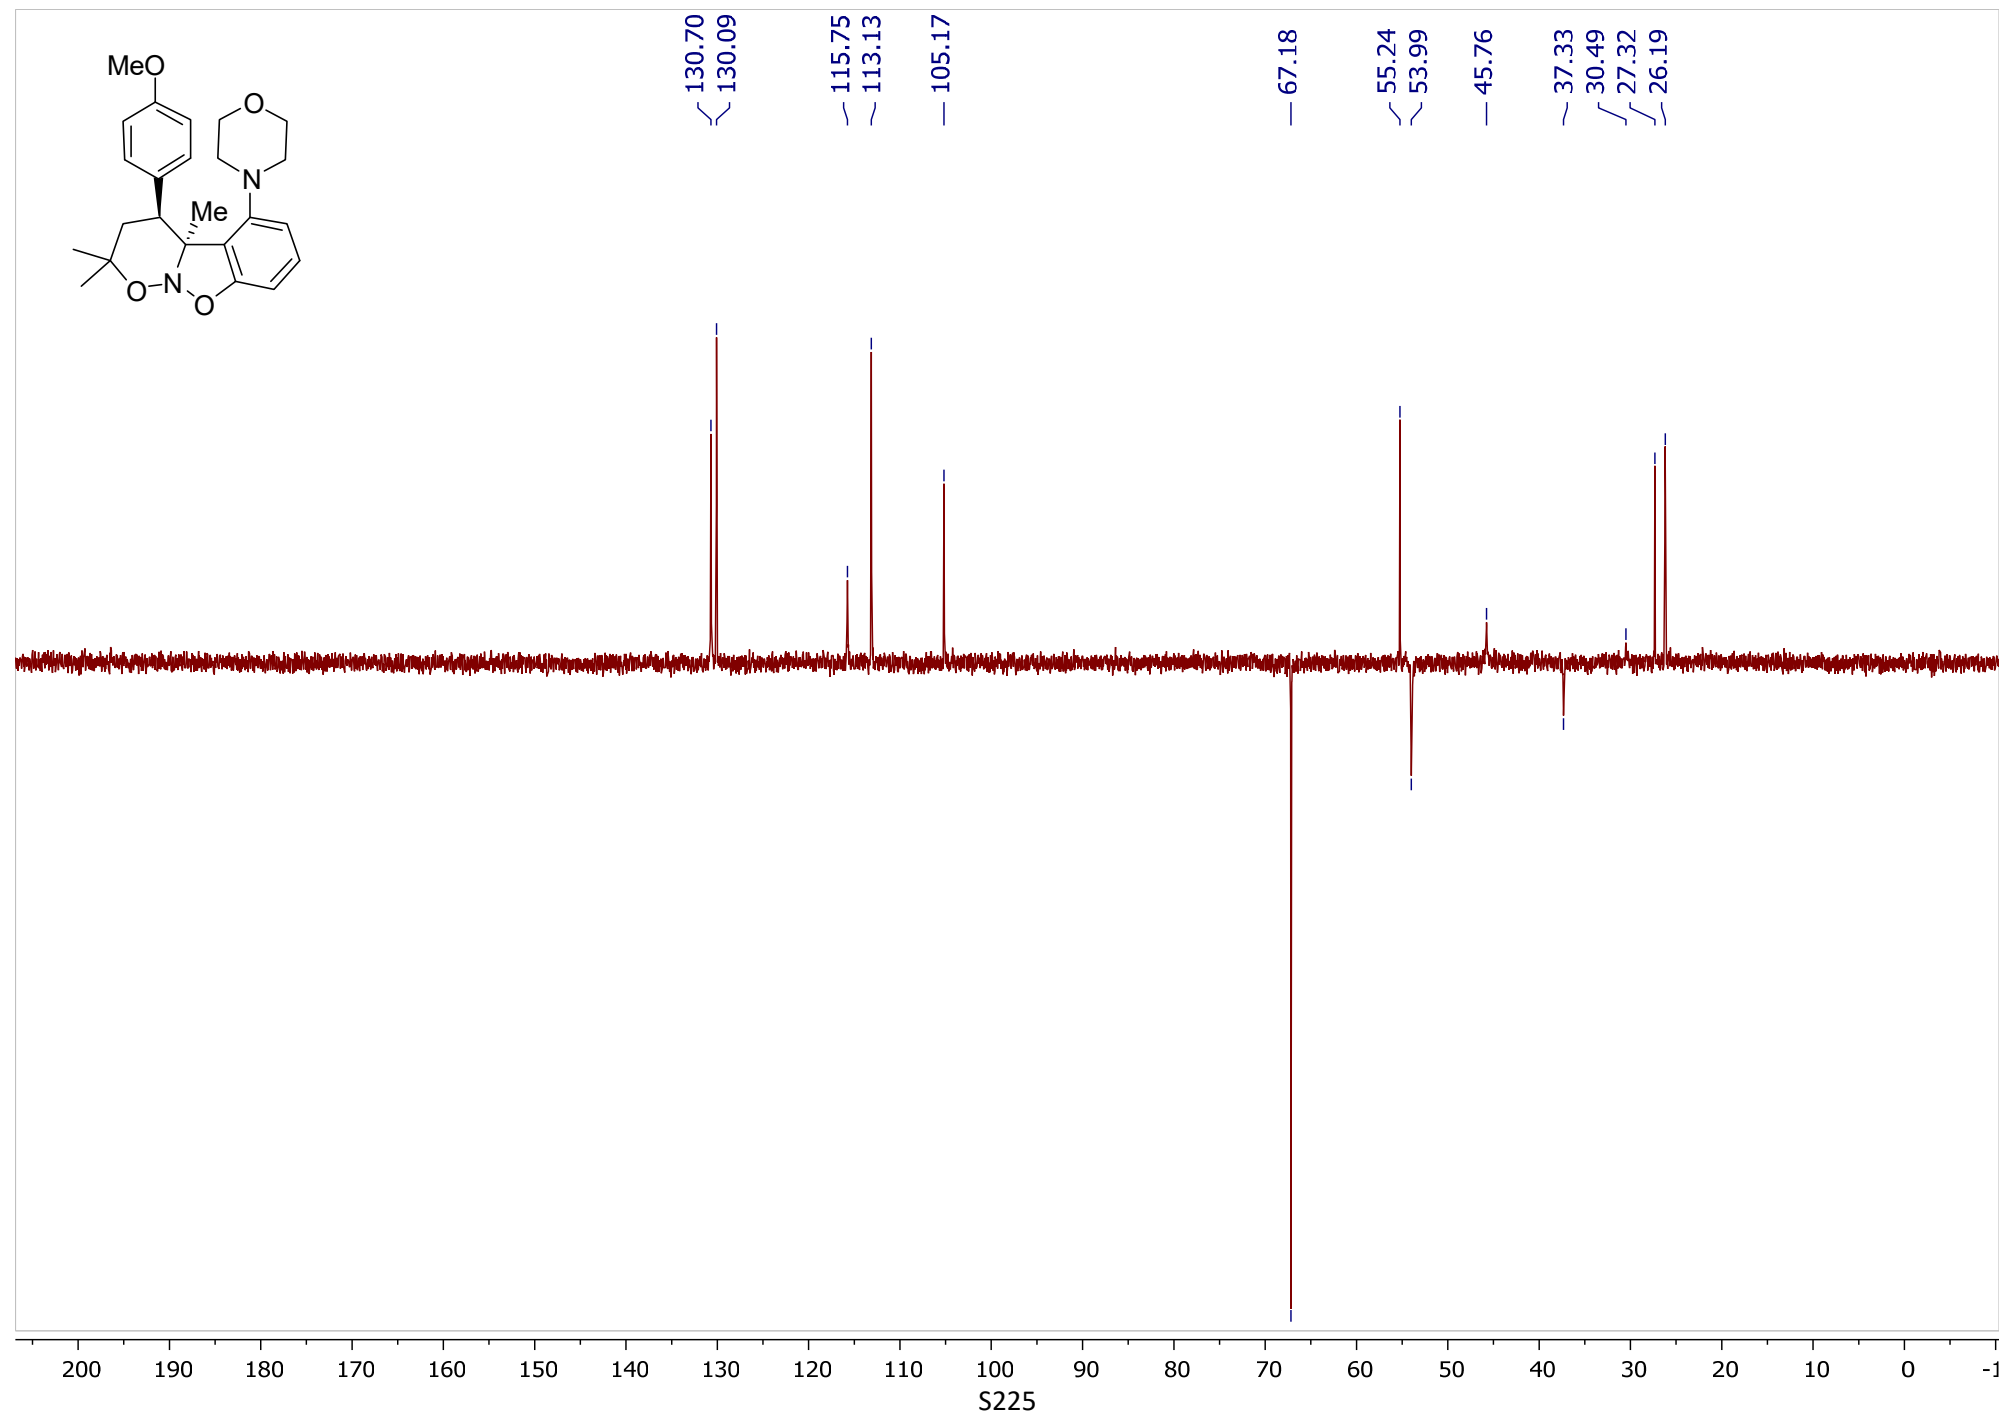

$^1\text{H}$ - $^1\text{H}$  COSY

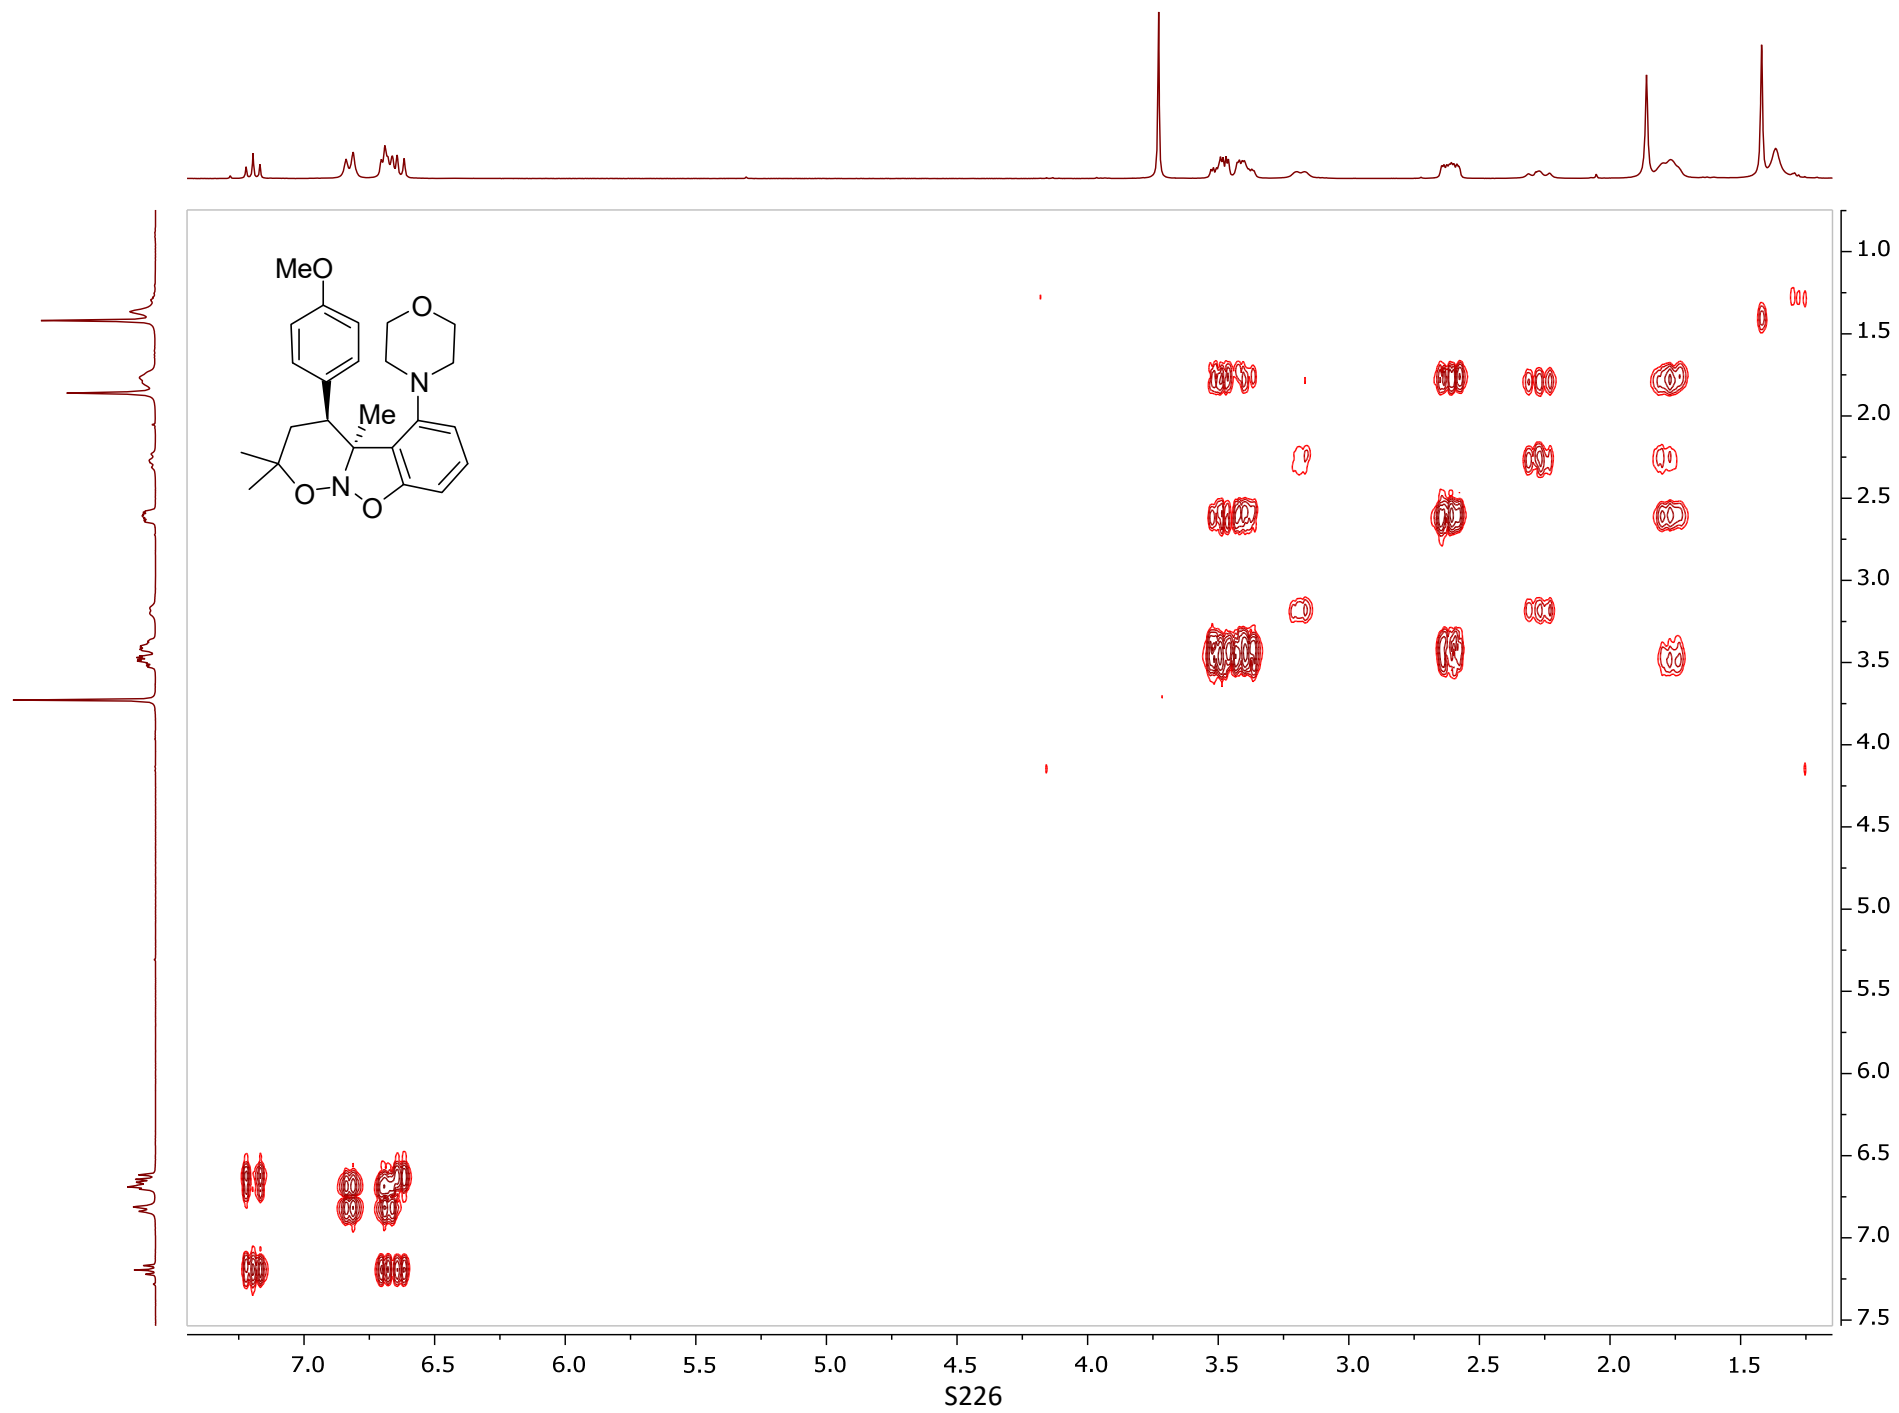

$^1\text{H}$ - $^{13}\text{C}$  HSQC

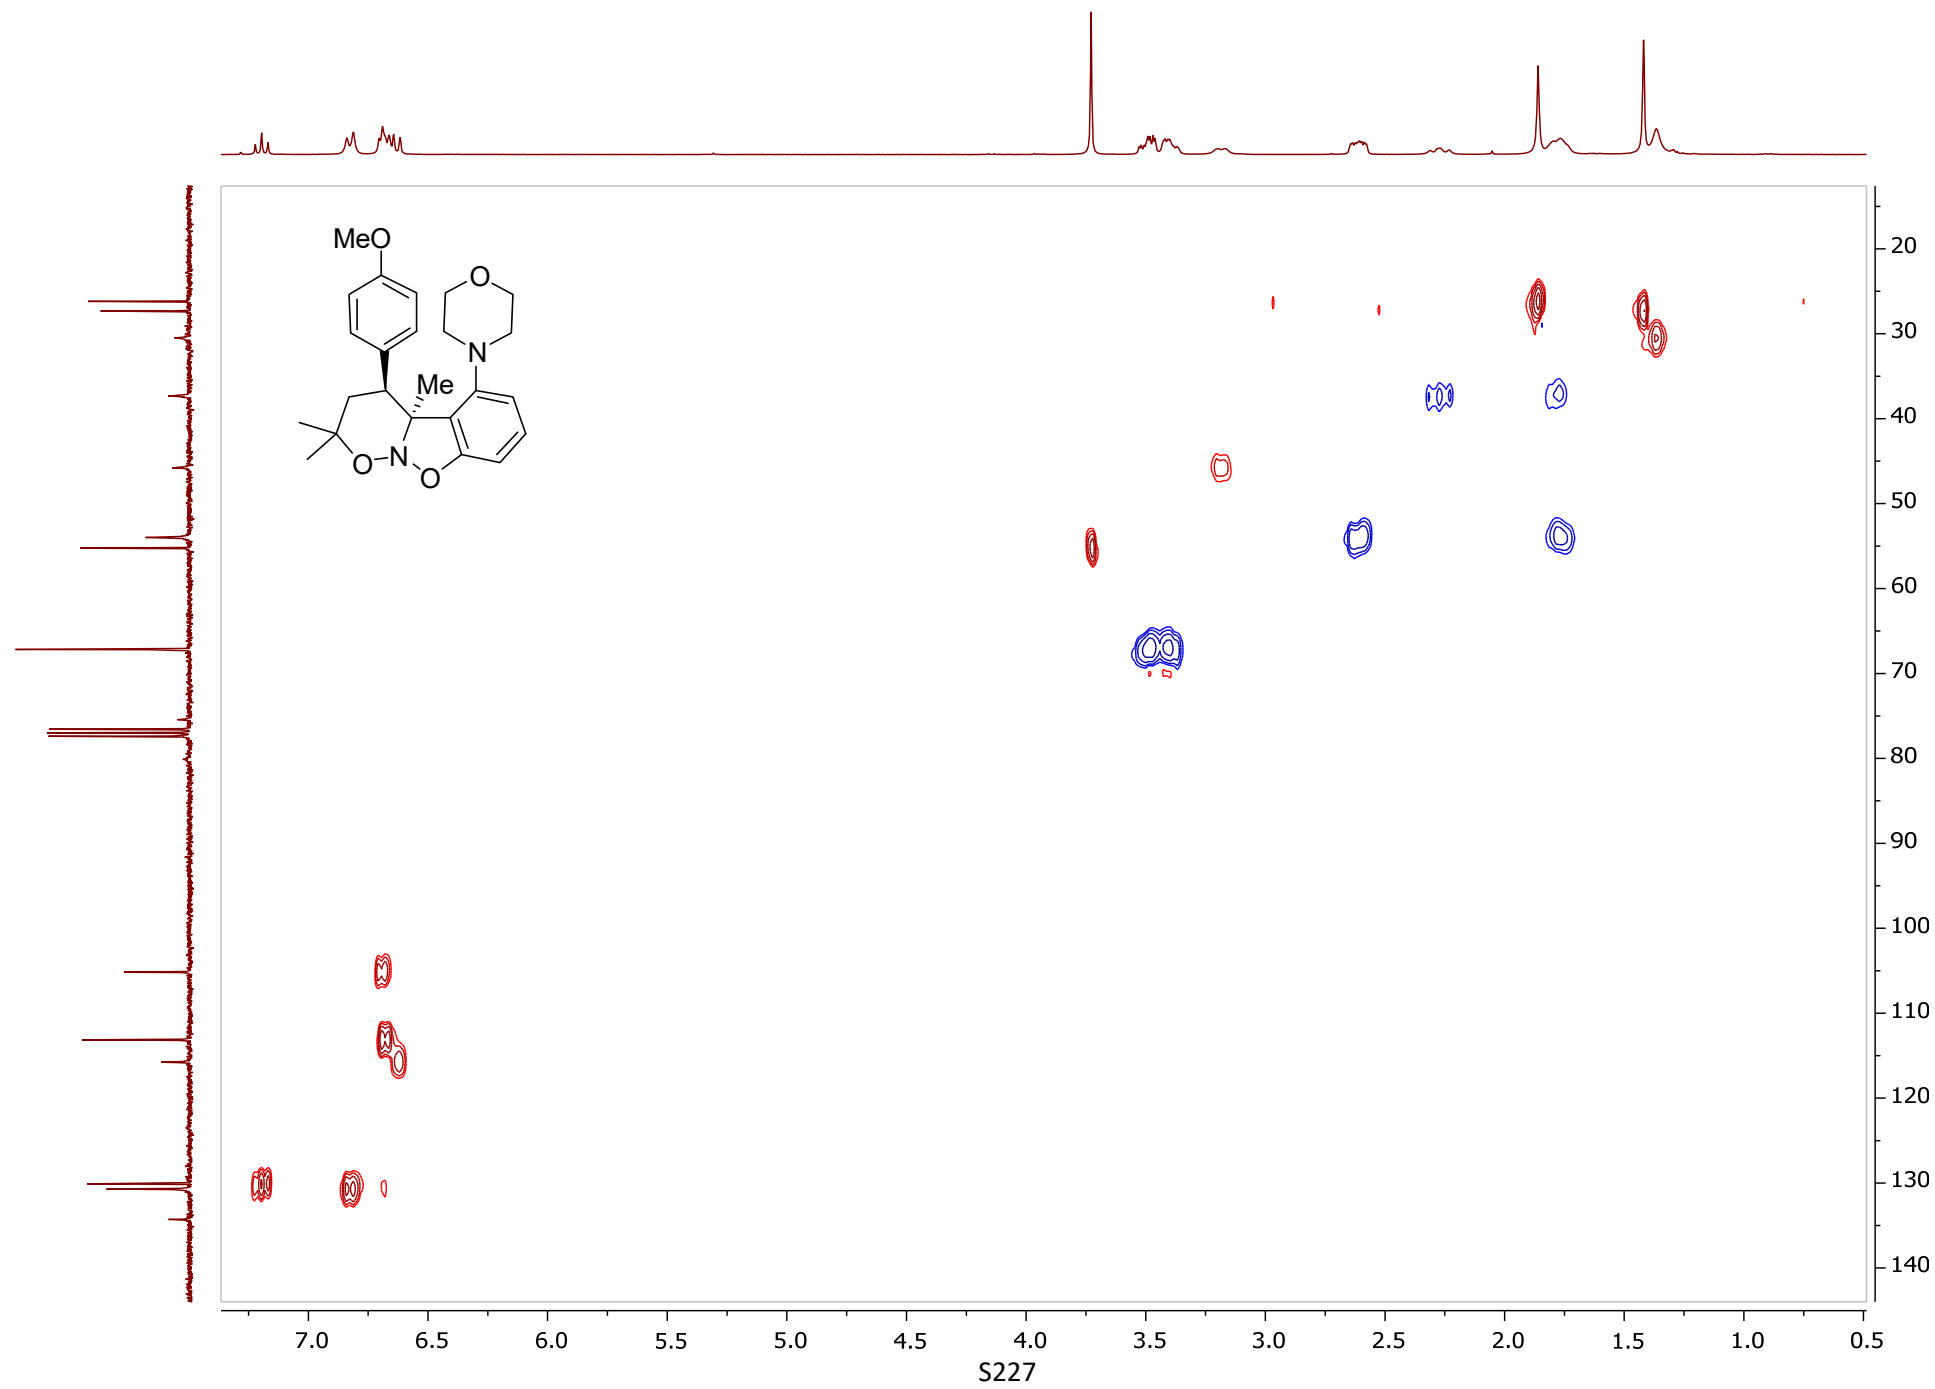

$^1\text{H}$ - $^{13}\text{C}$  HMBC

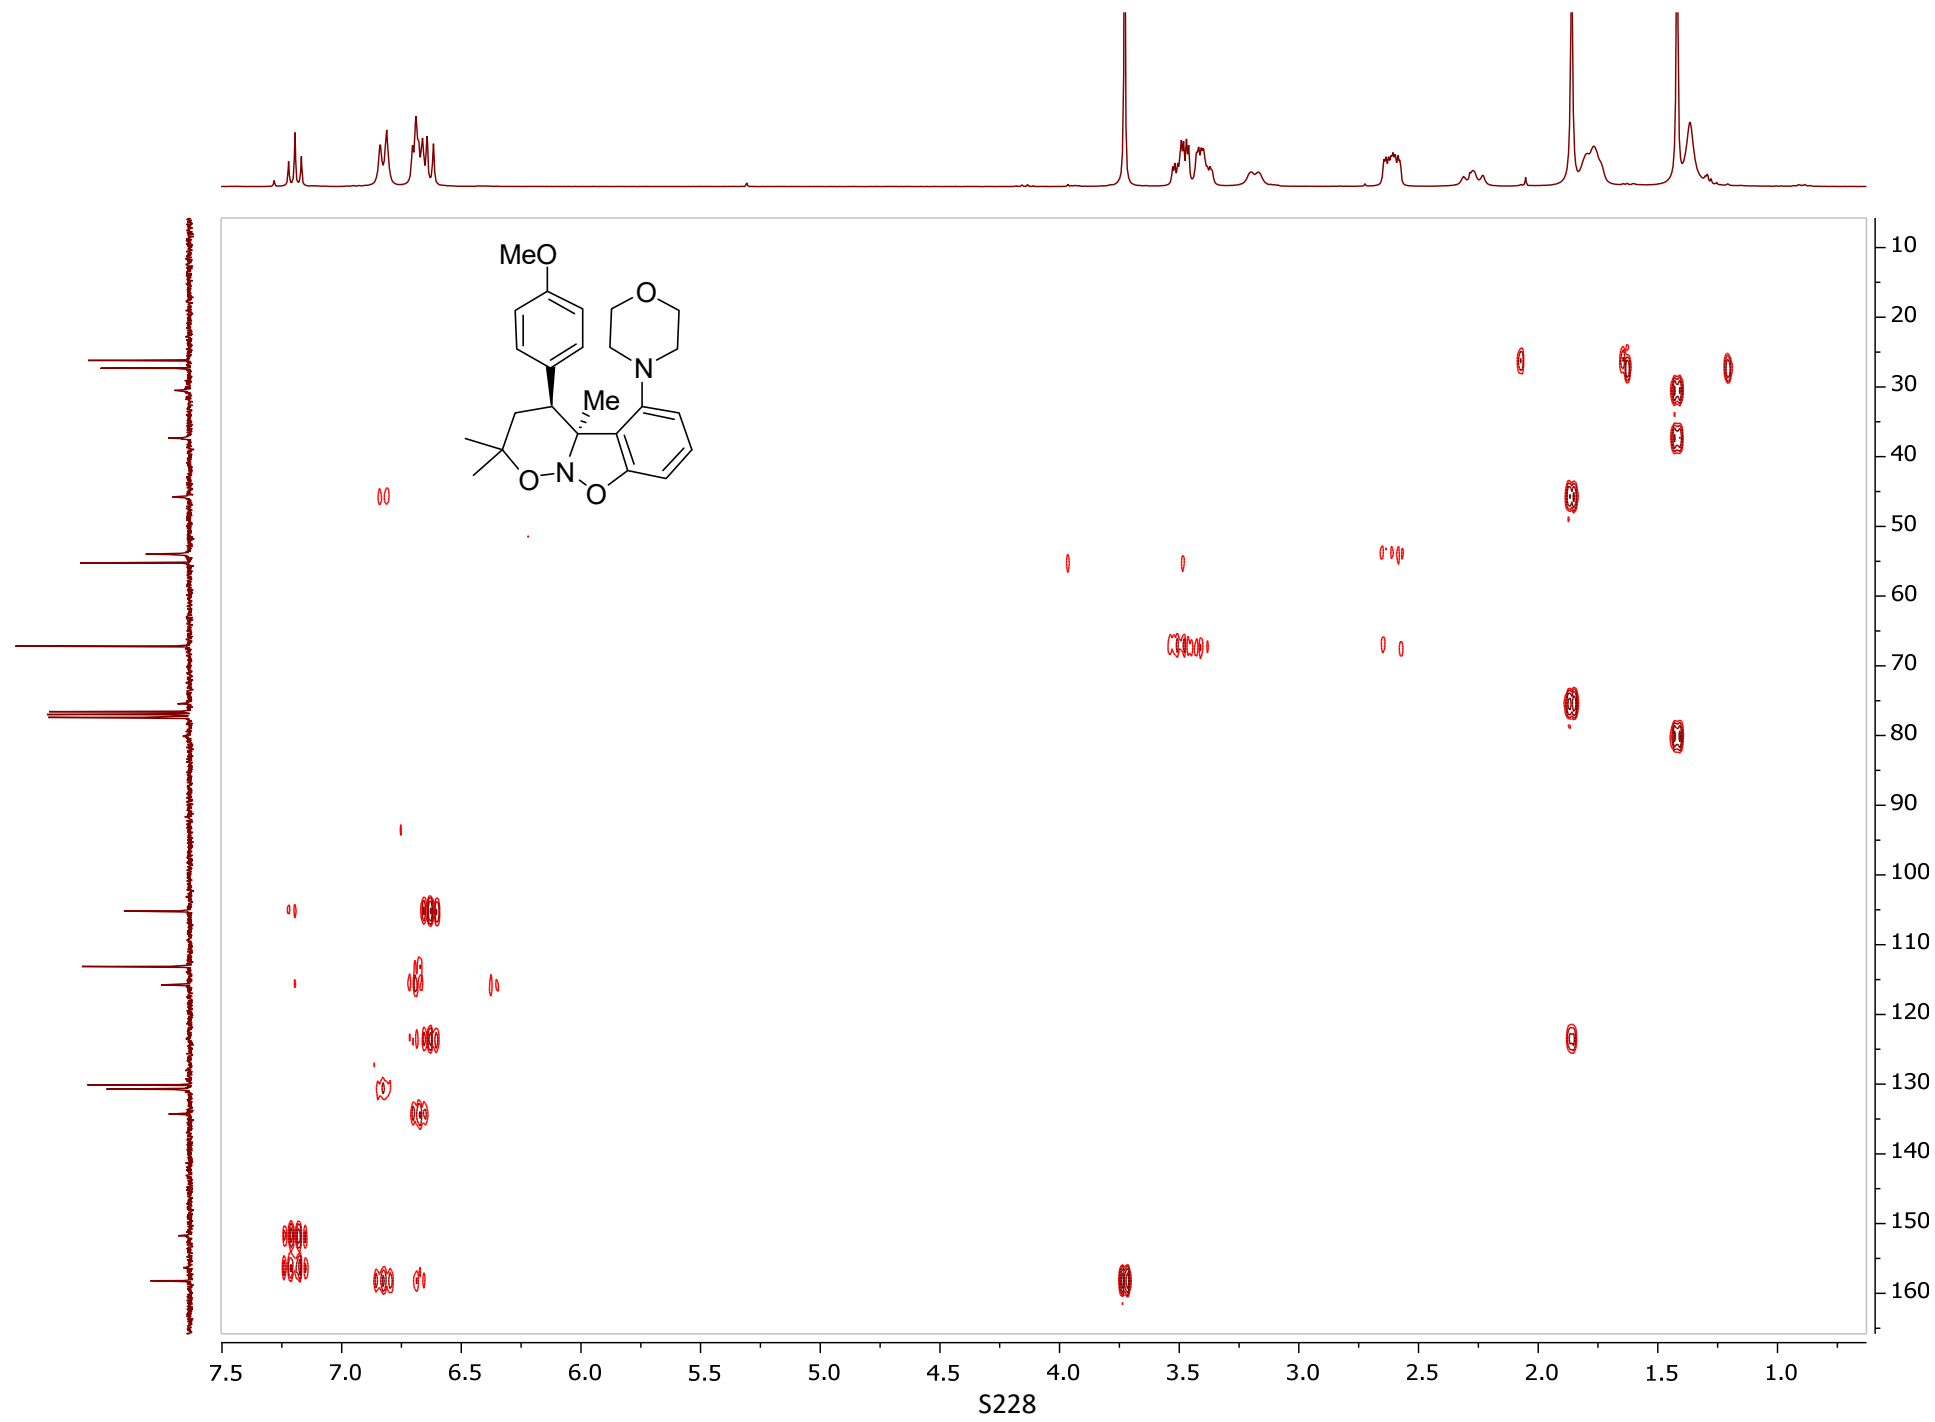

$^1\text{H}$ - $^1\text{H}$  NOESY

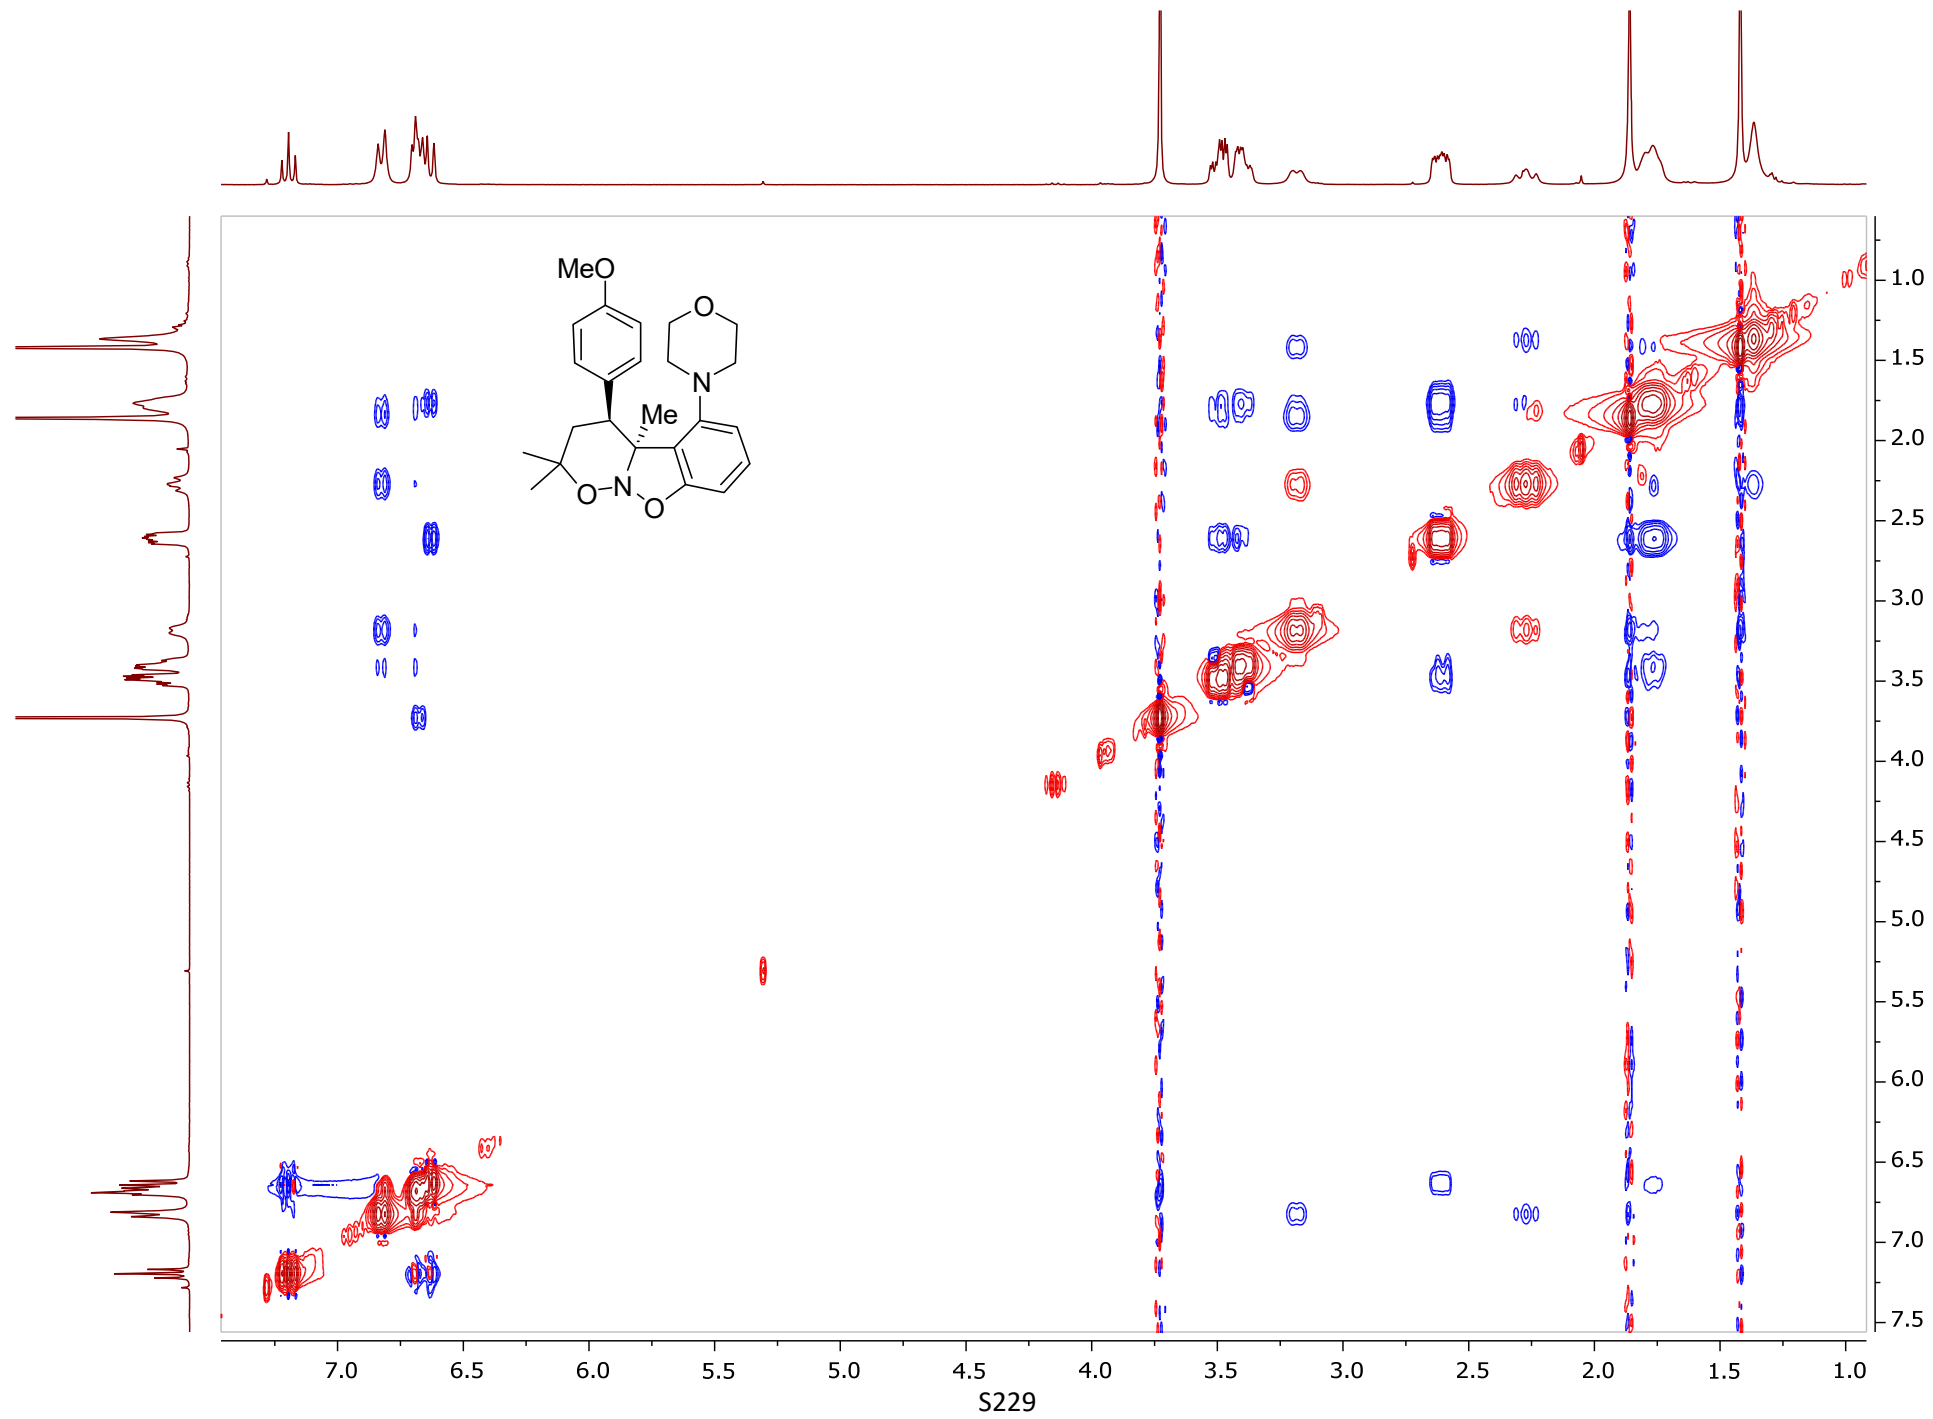

4-(4-Methoxyphenyl)-2,2,4a-trimethyl-5-morpholino-2,3,4,4a-tetrahydrobenzo[4,5]isoxazolo[2,3-b][1,2]oxazine 5ac, minor ((4*S*\*,4a*R*\*)-isomer)

<sup>1</sup>H NMR (300 MHz, CDCl<sub>3</sub>)

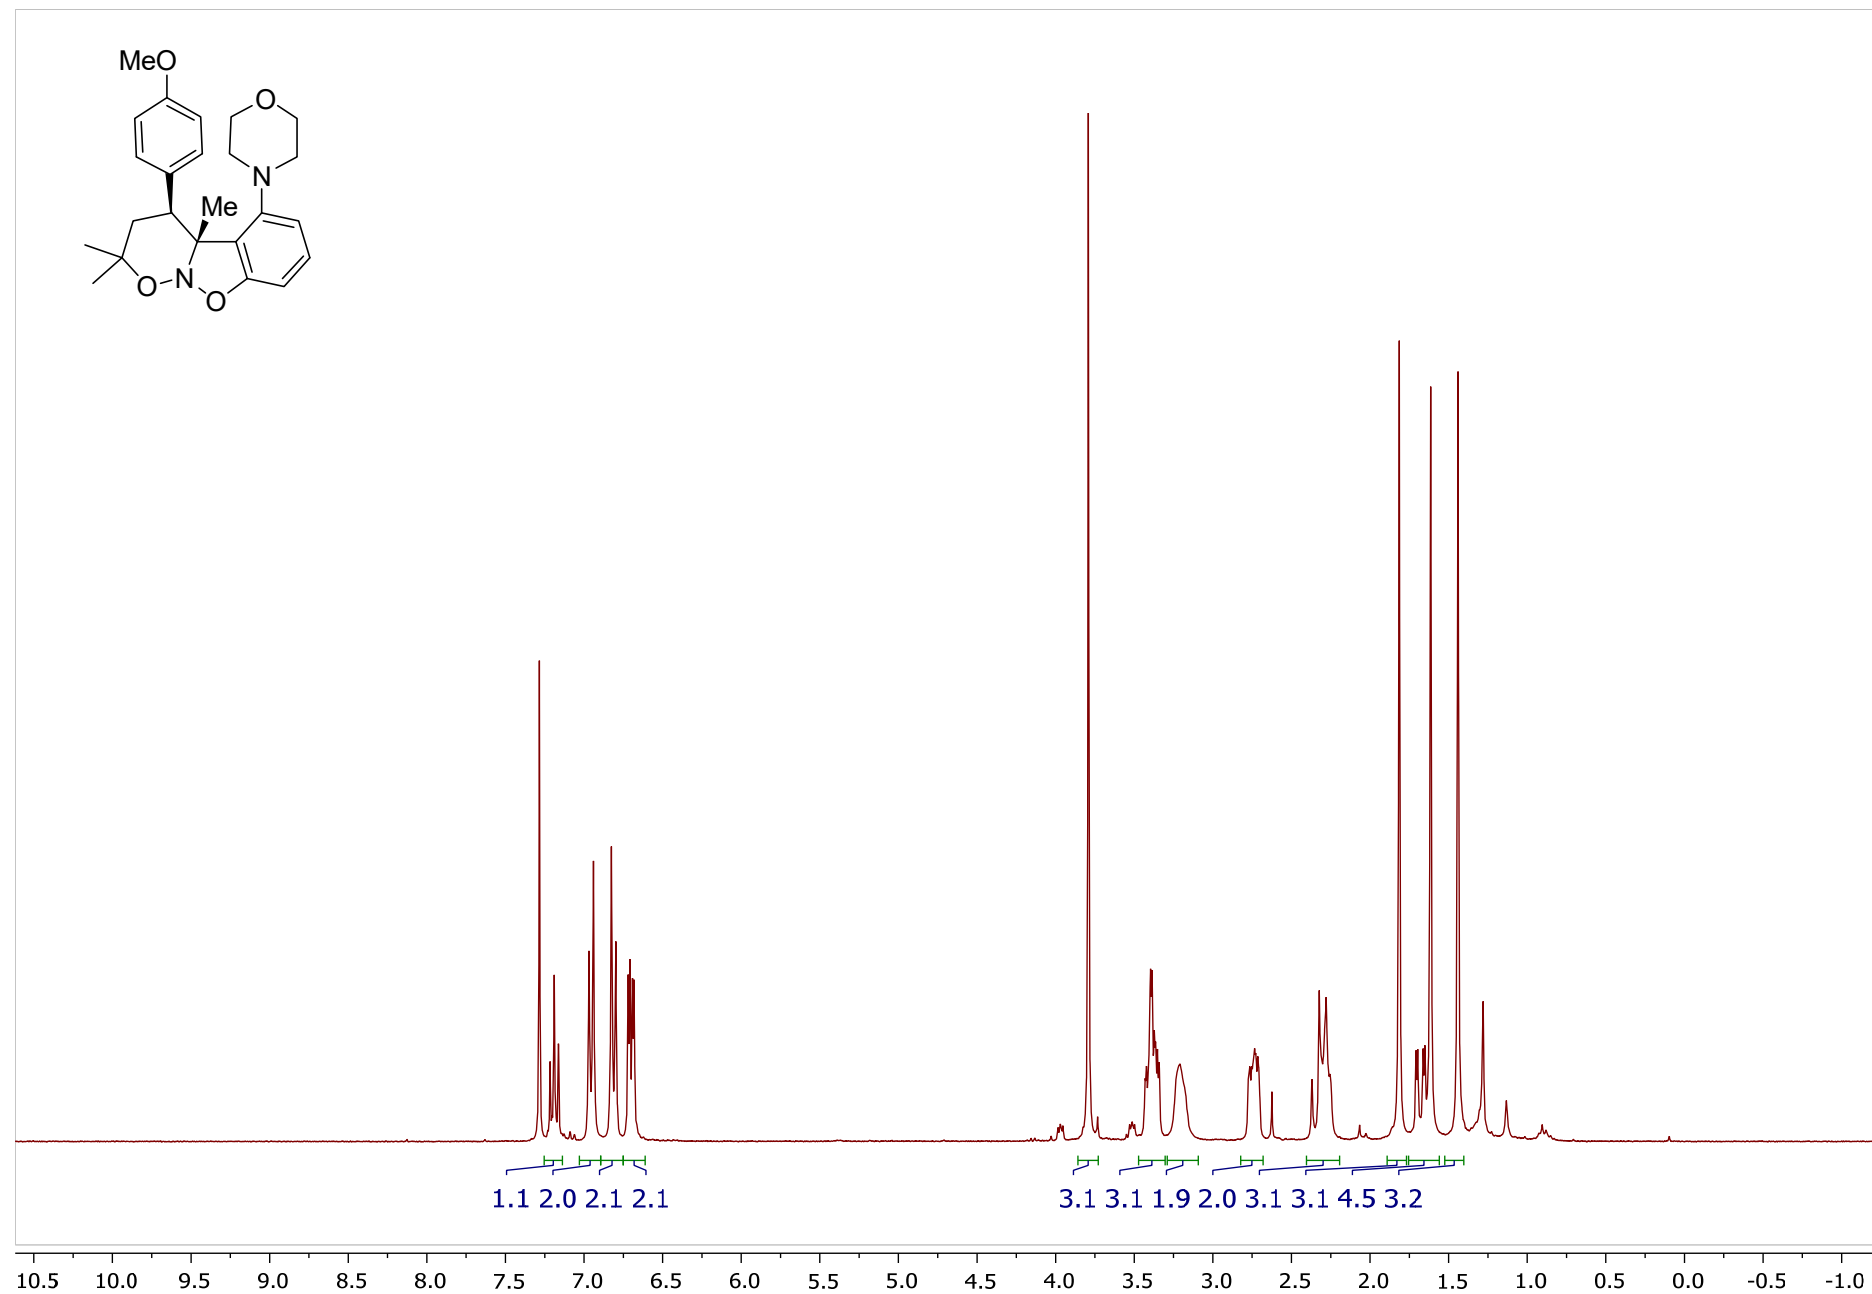

<sup>13</sup>C NMR (75 MHz, CDCl<sub>3</sub>)

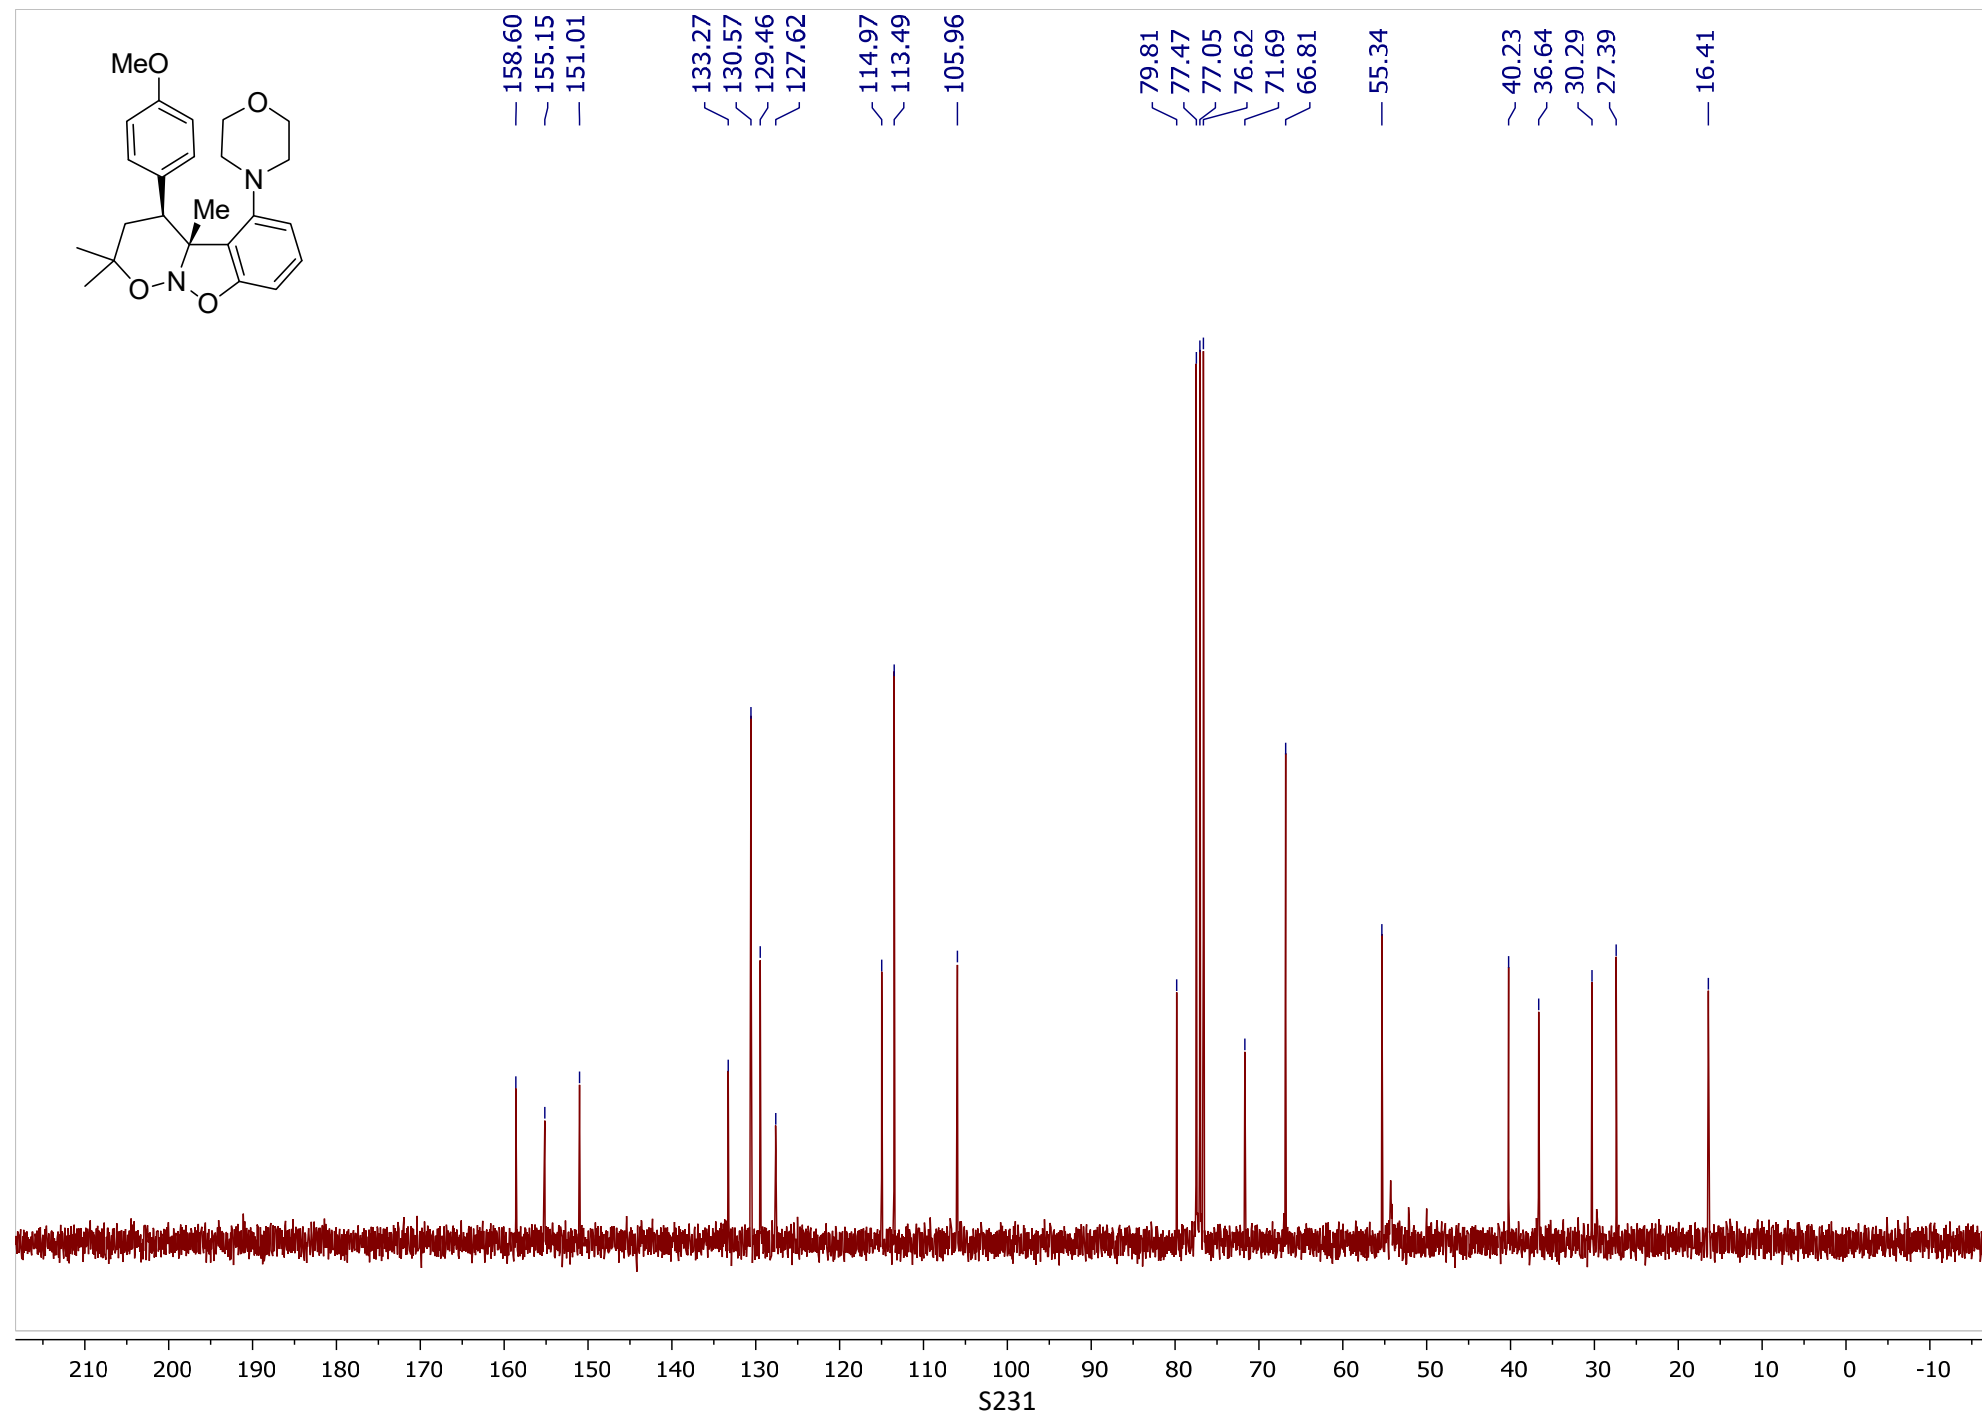

$^{13}\text{C}$  DEPT 135 (75 MHz,  $\text{CDCl}_3$ )

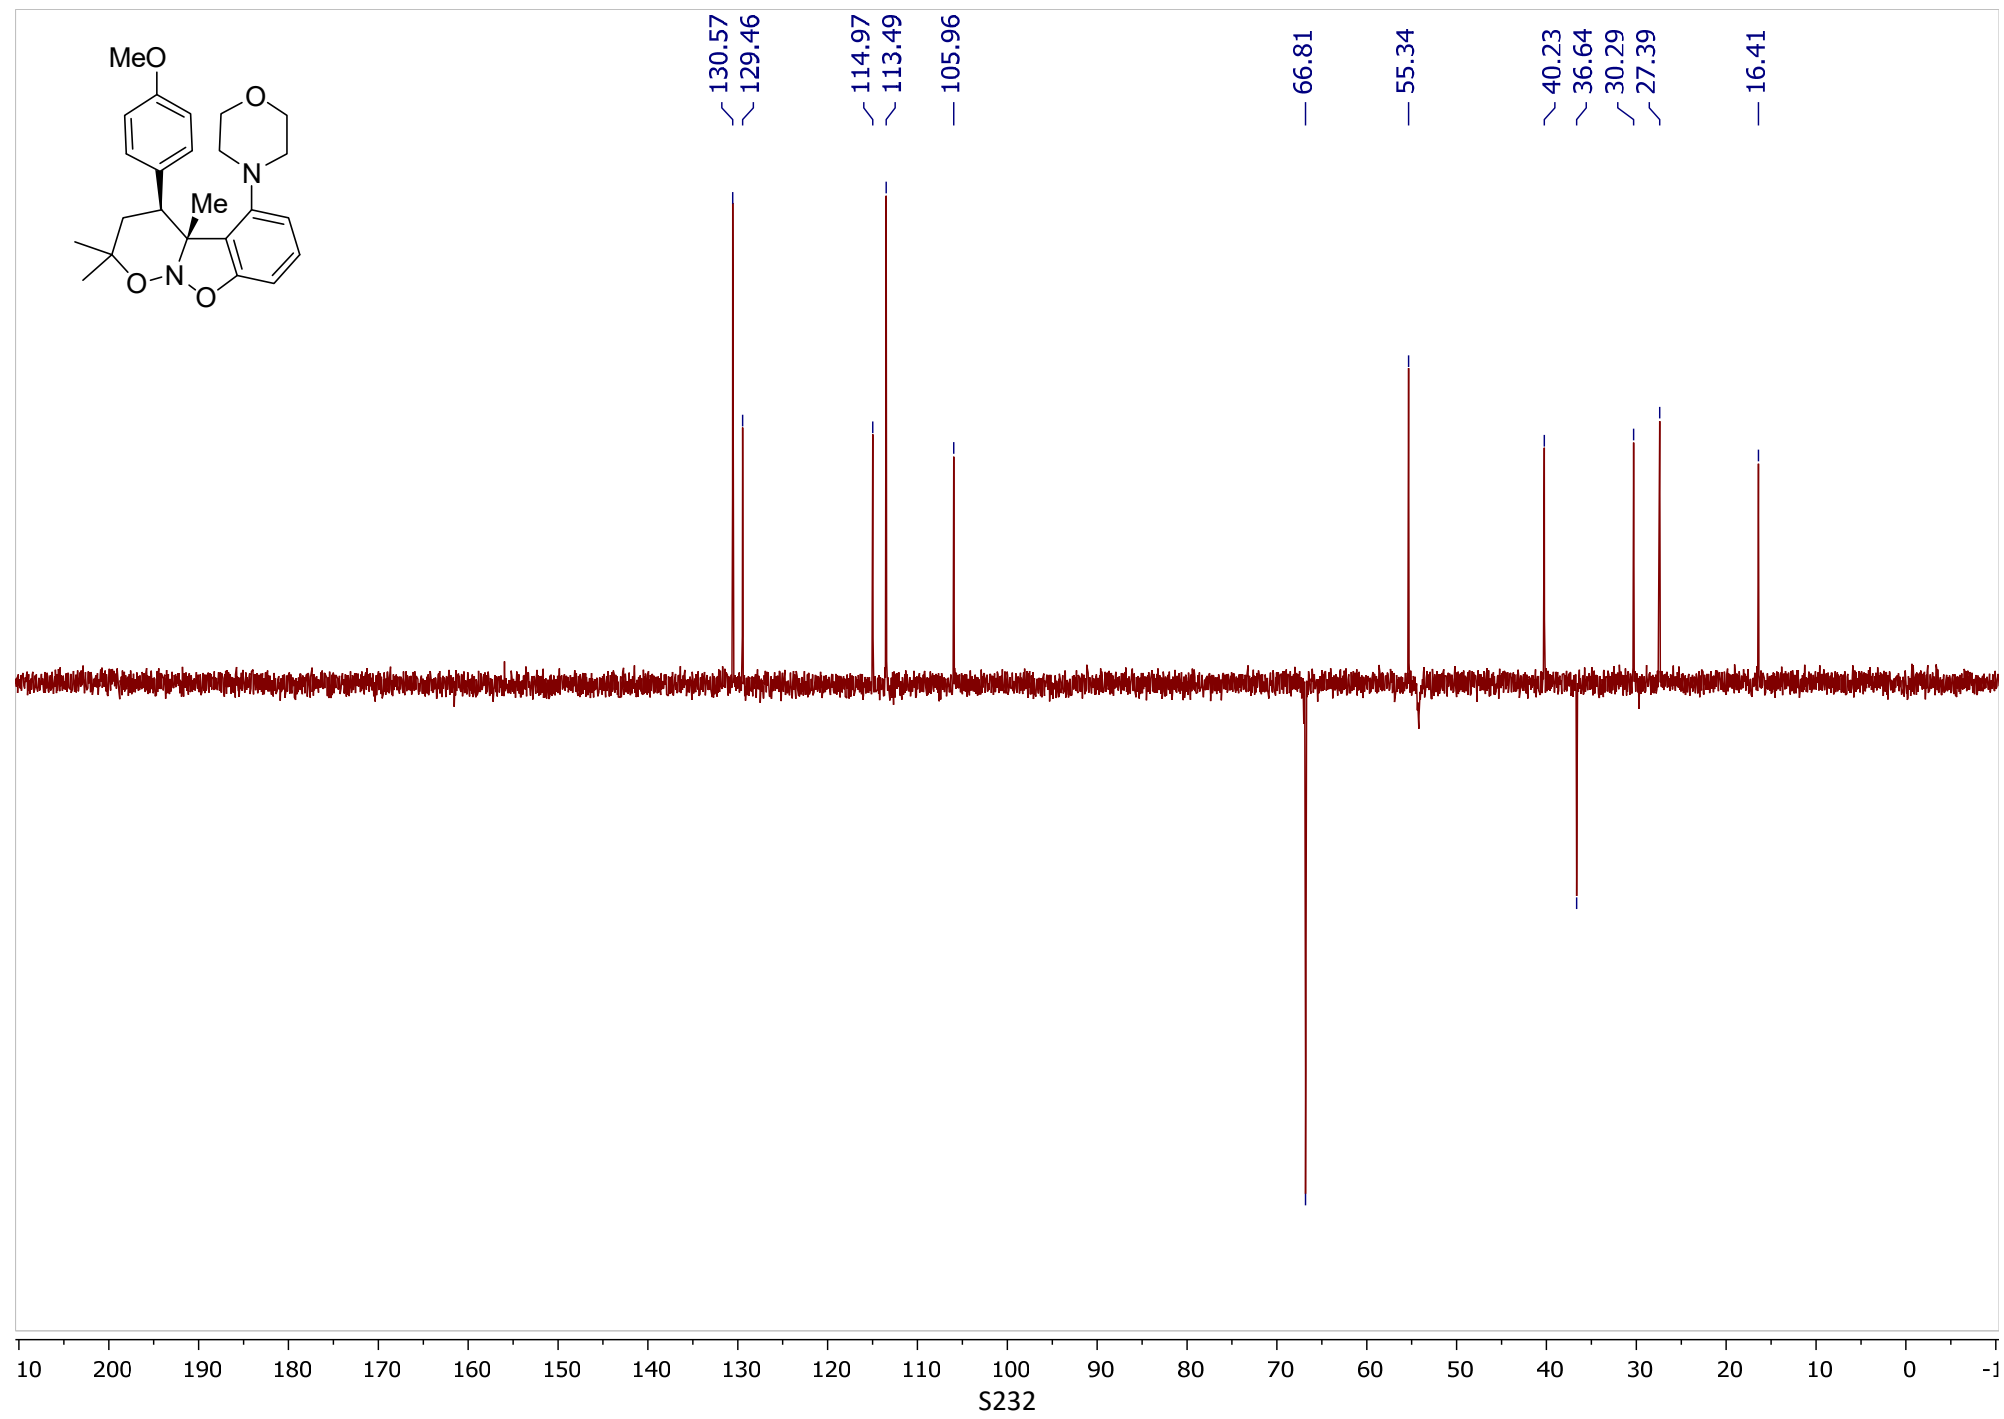



$^1\text{H}$ - $^1\text{H}$  COSY

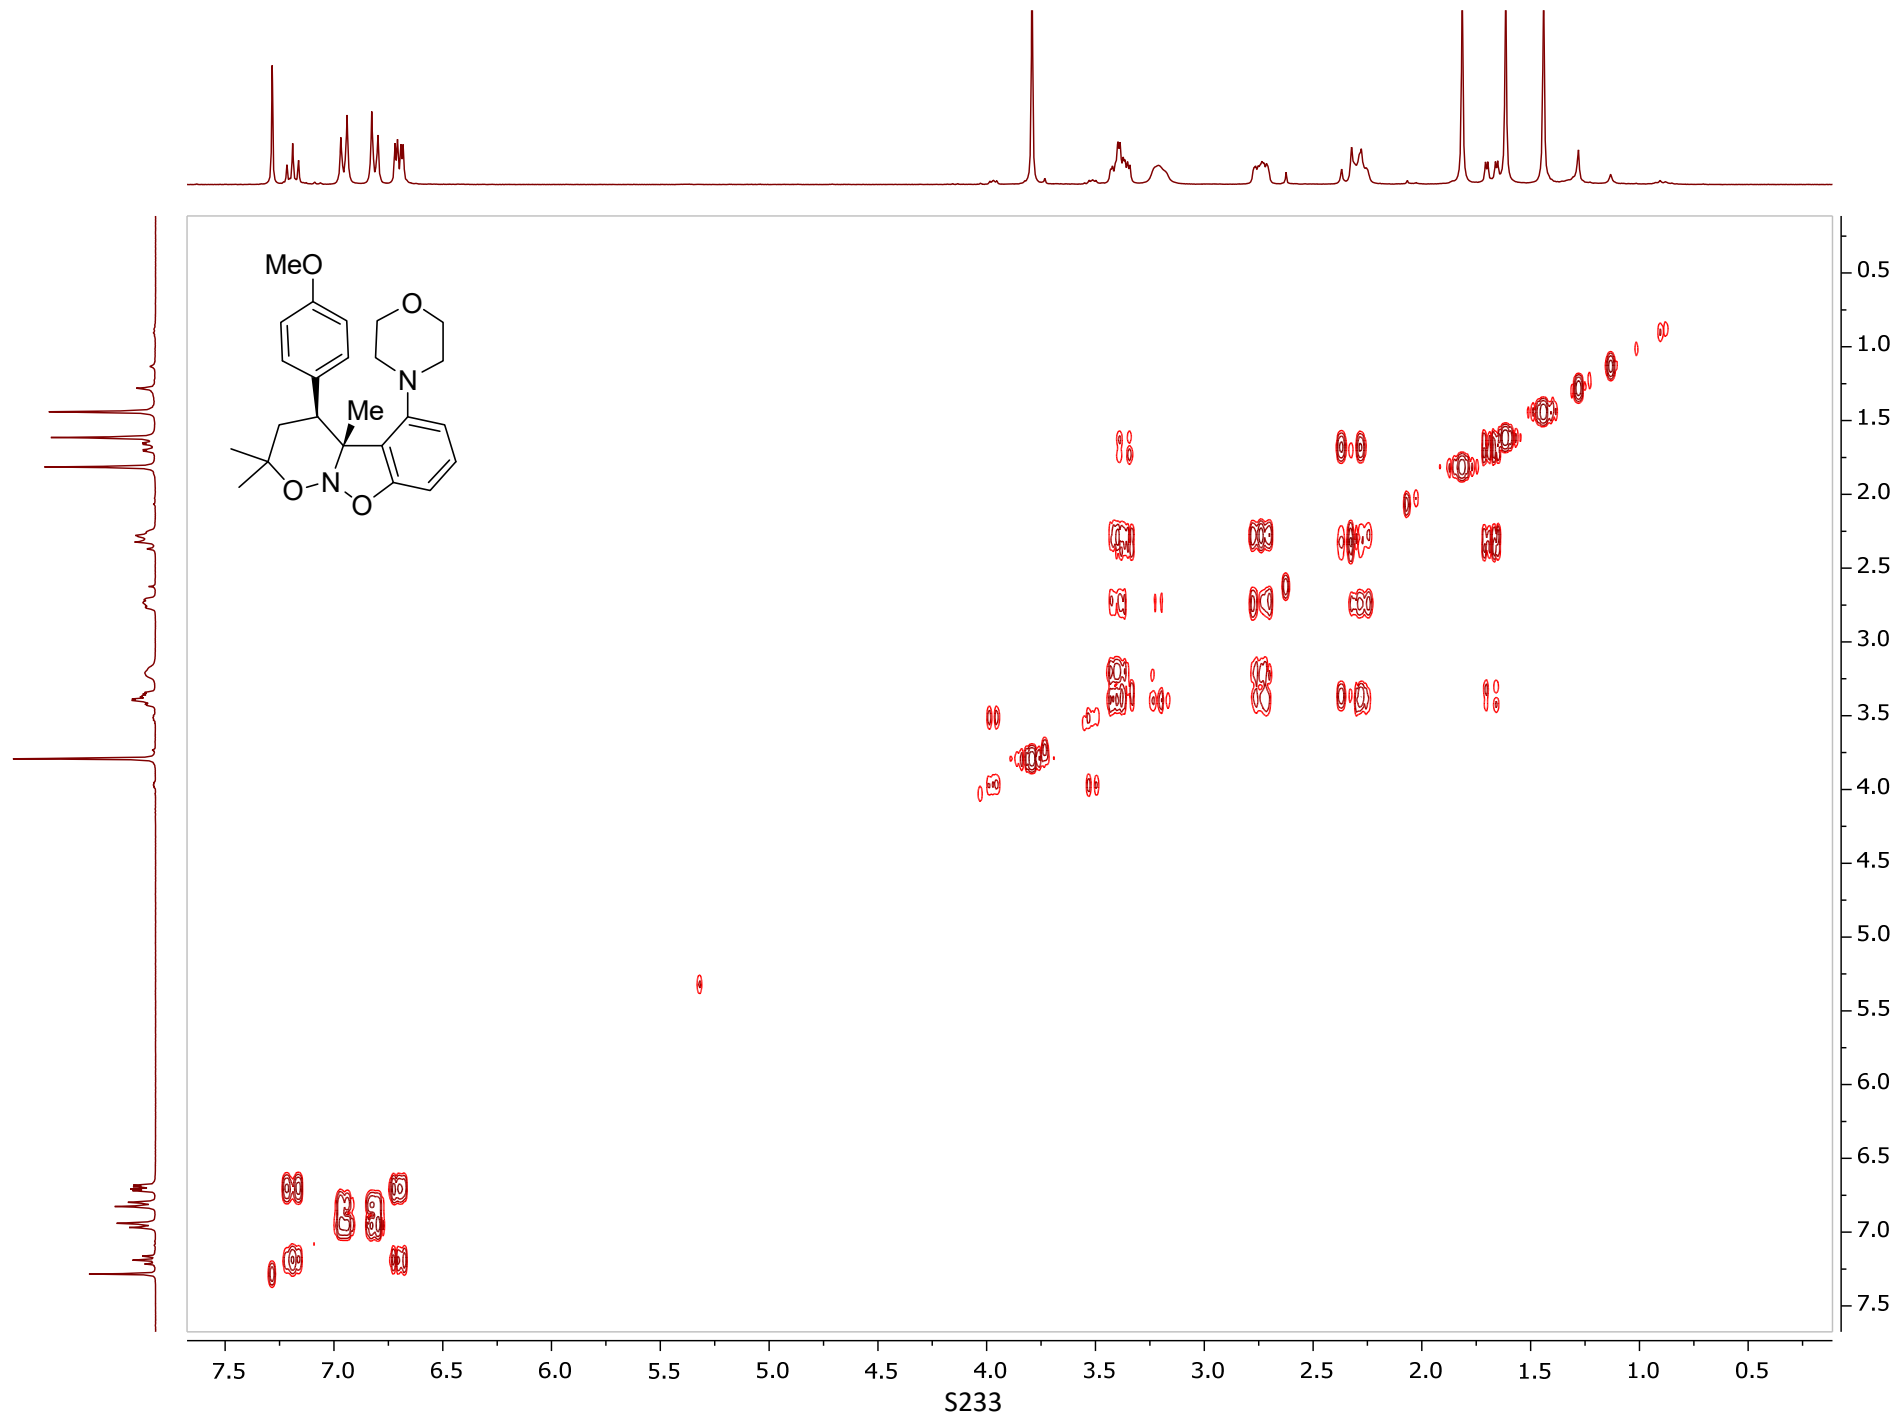

$^1\text{H}$ - $^{13}\text{C}$  HSQC

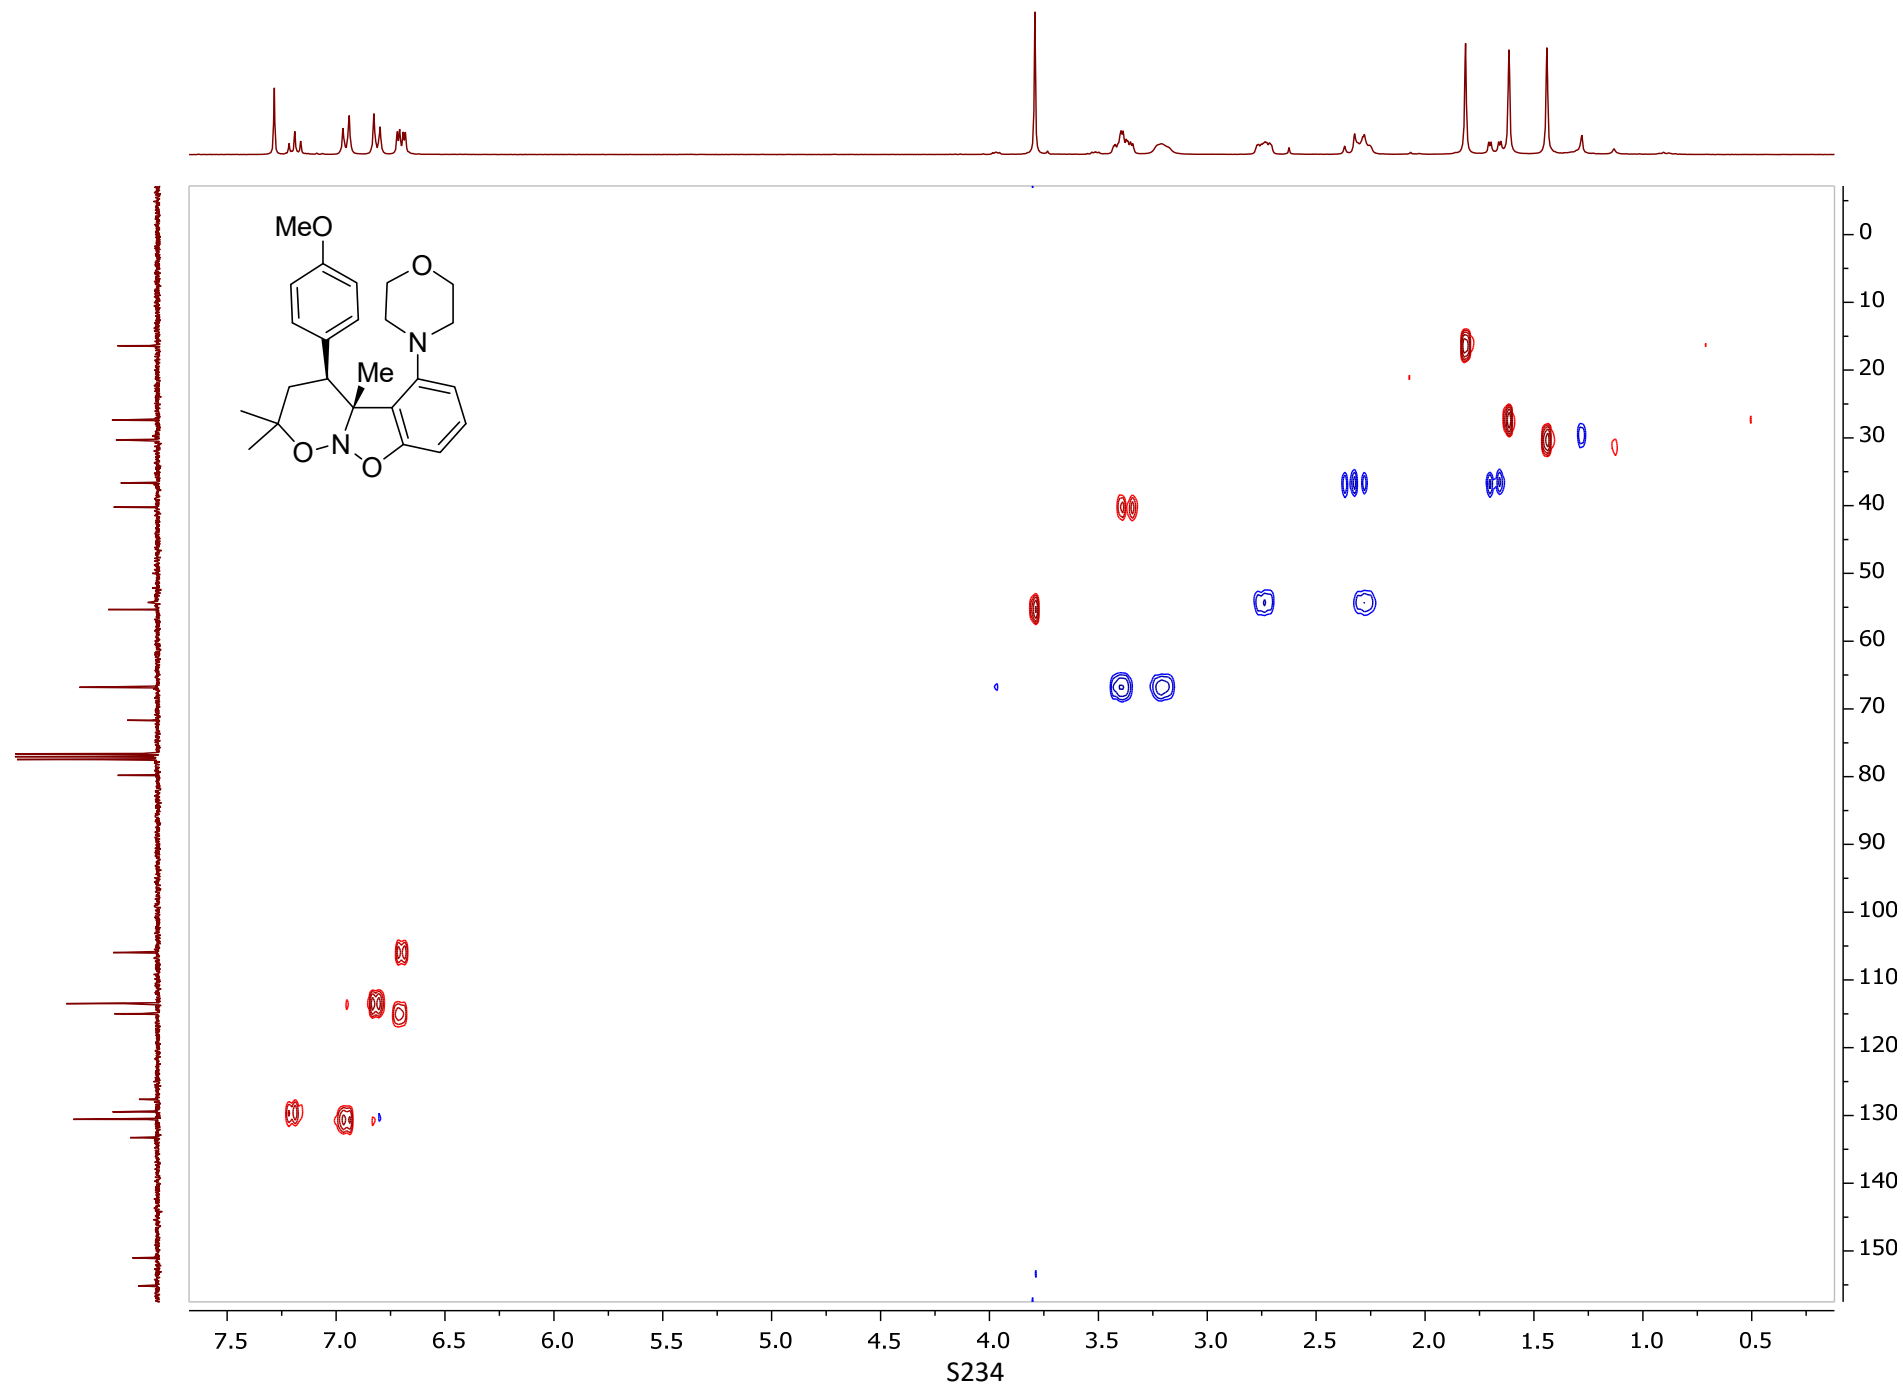

$^1\text{H}$ - $^{13}\text{C}$  HMBC

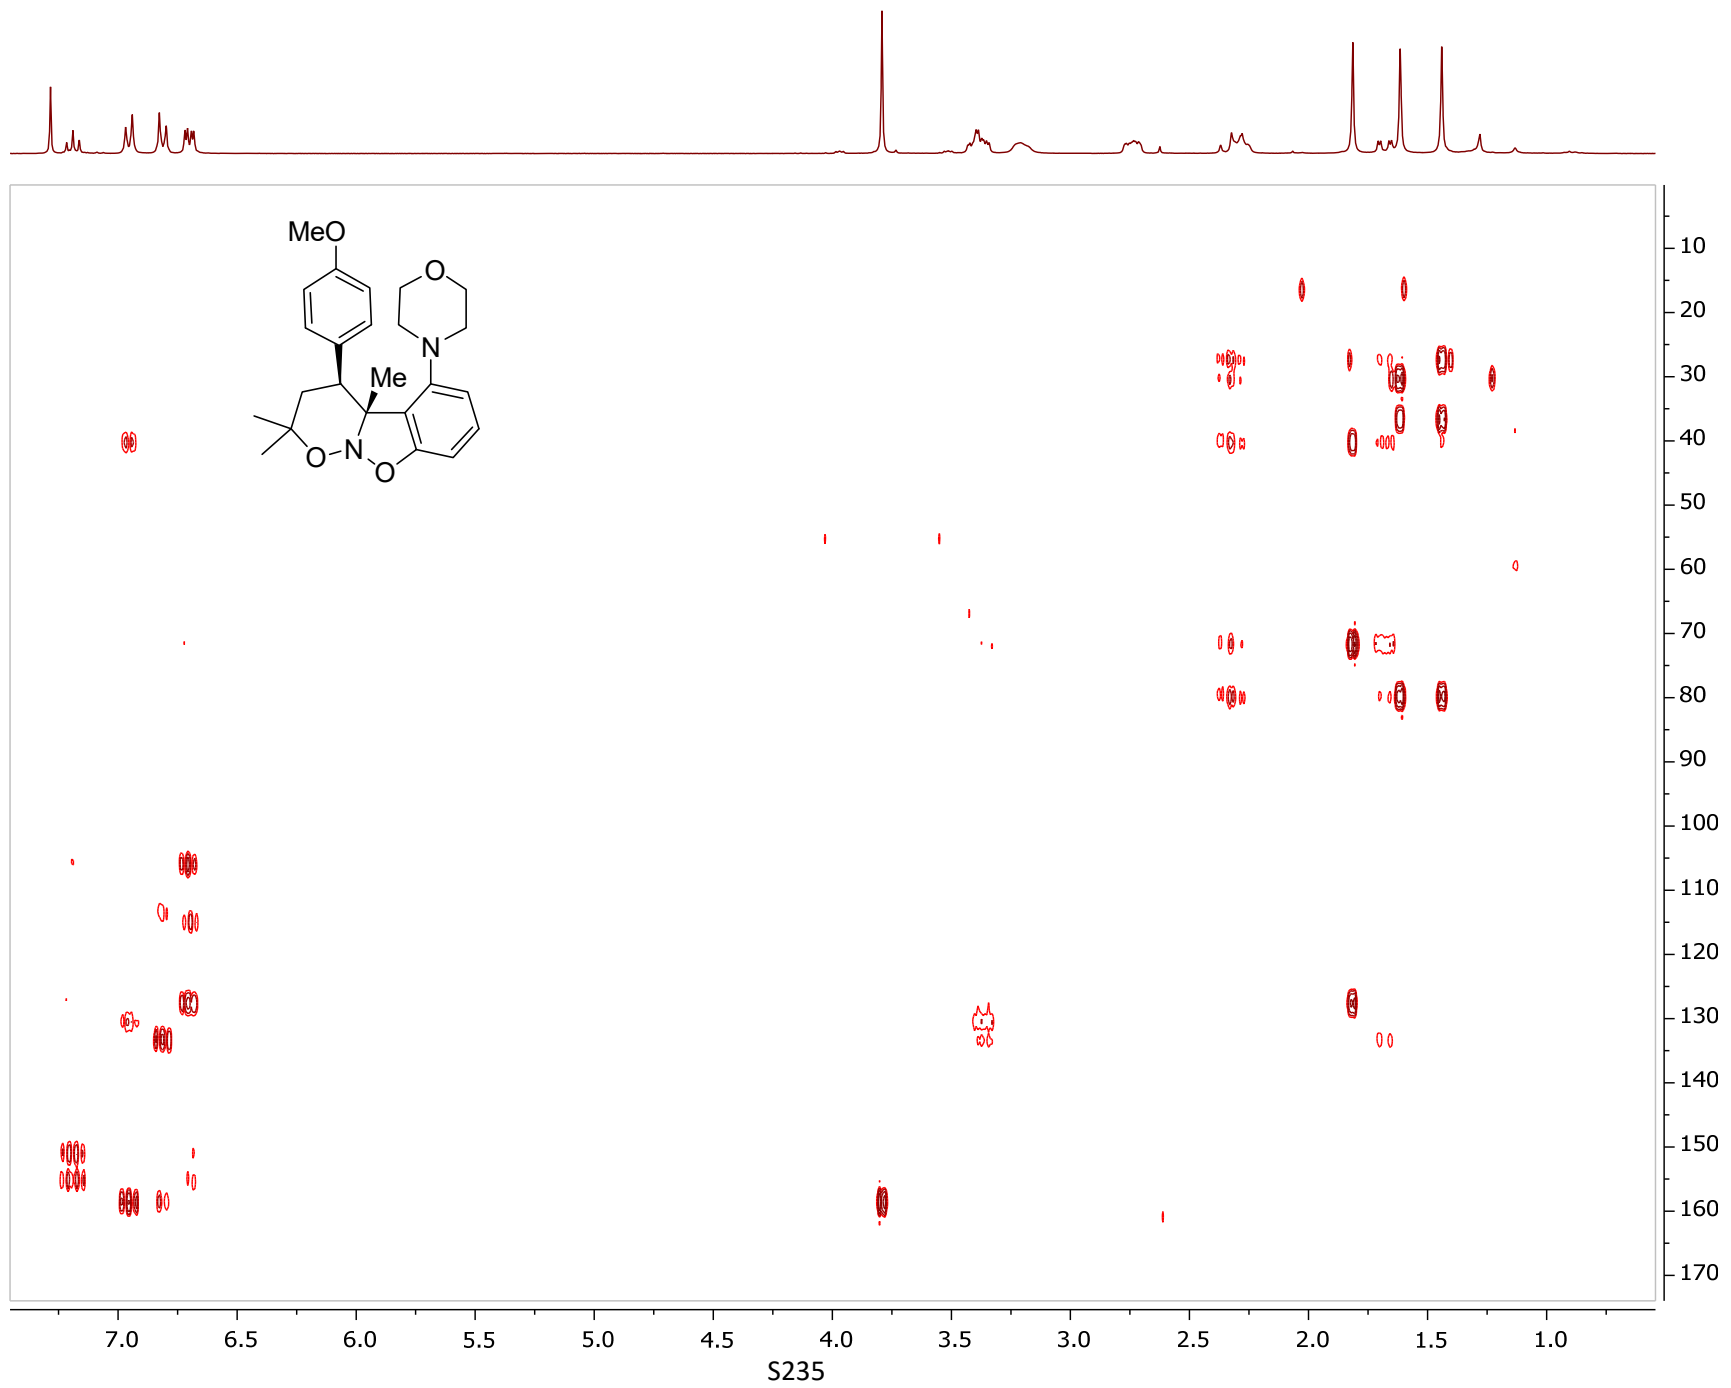



***tert*-Butyl (11*R*\*,11*aR*\*)-11-(4-methoxyphenyl)-9,9,11a-trimethyl-9,10,11,11a-tetrahydro-3H-[1,2]oxazino[2',3':2,3]isoxazolo[4,5-*e*]indole-3-carboxylate 5ad**

<sup>1</sup>H NMR (300 MHz, CDCl<sub>3</sub>)

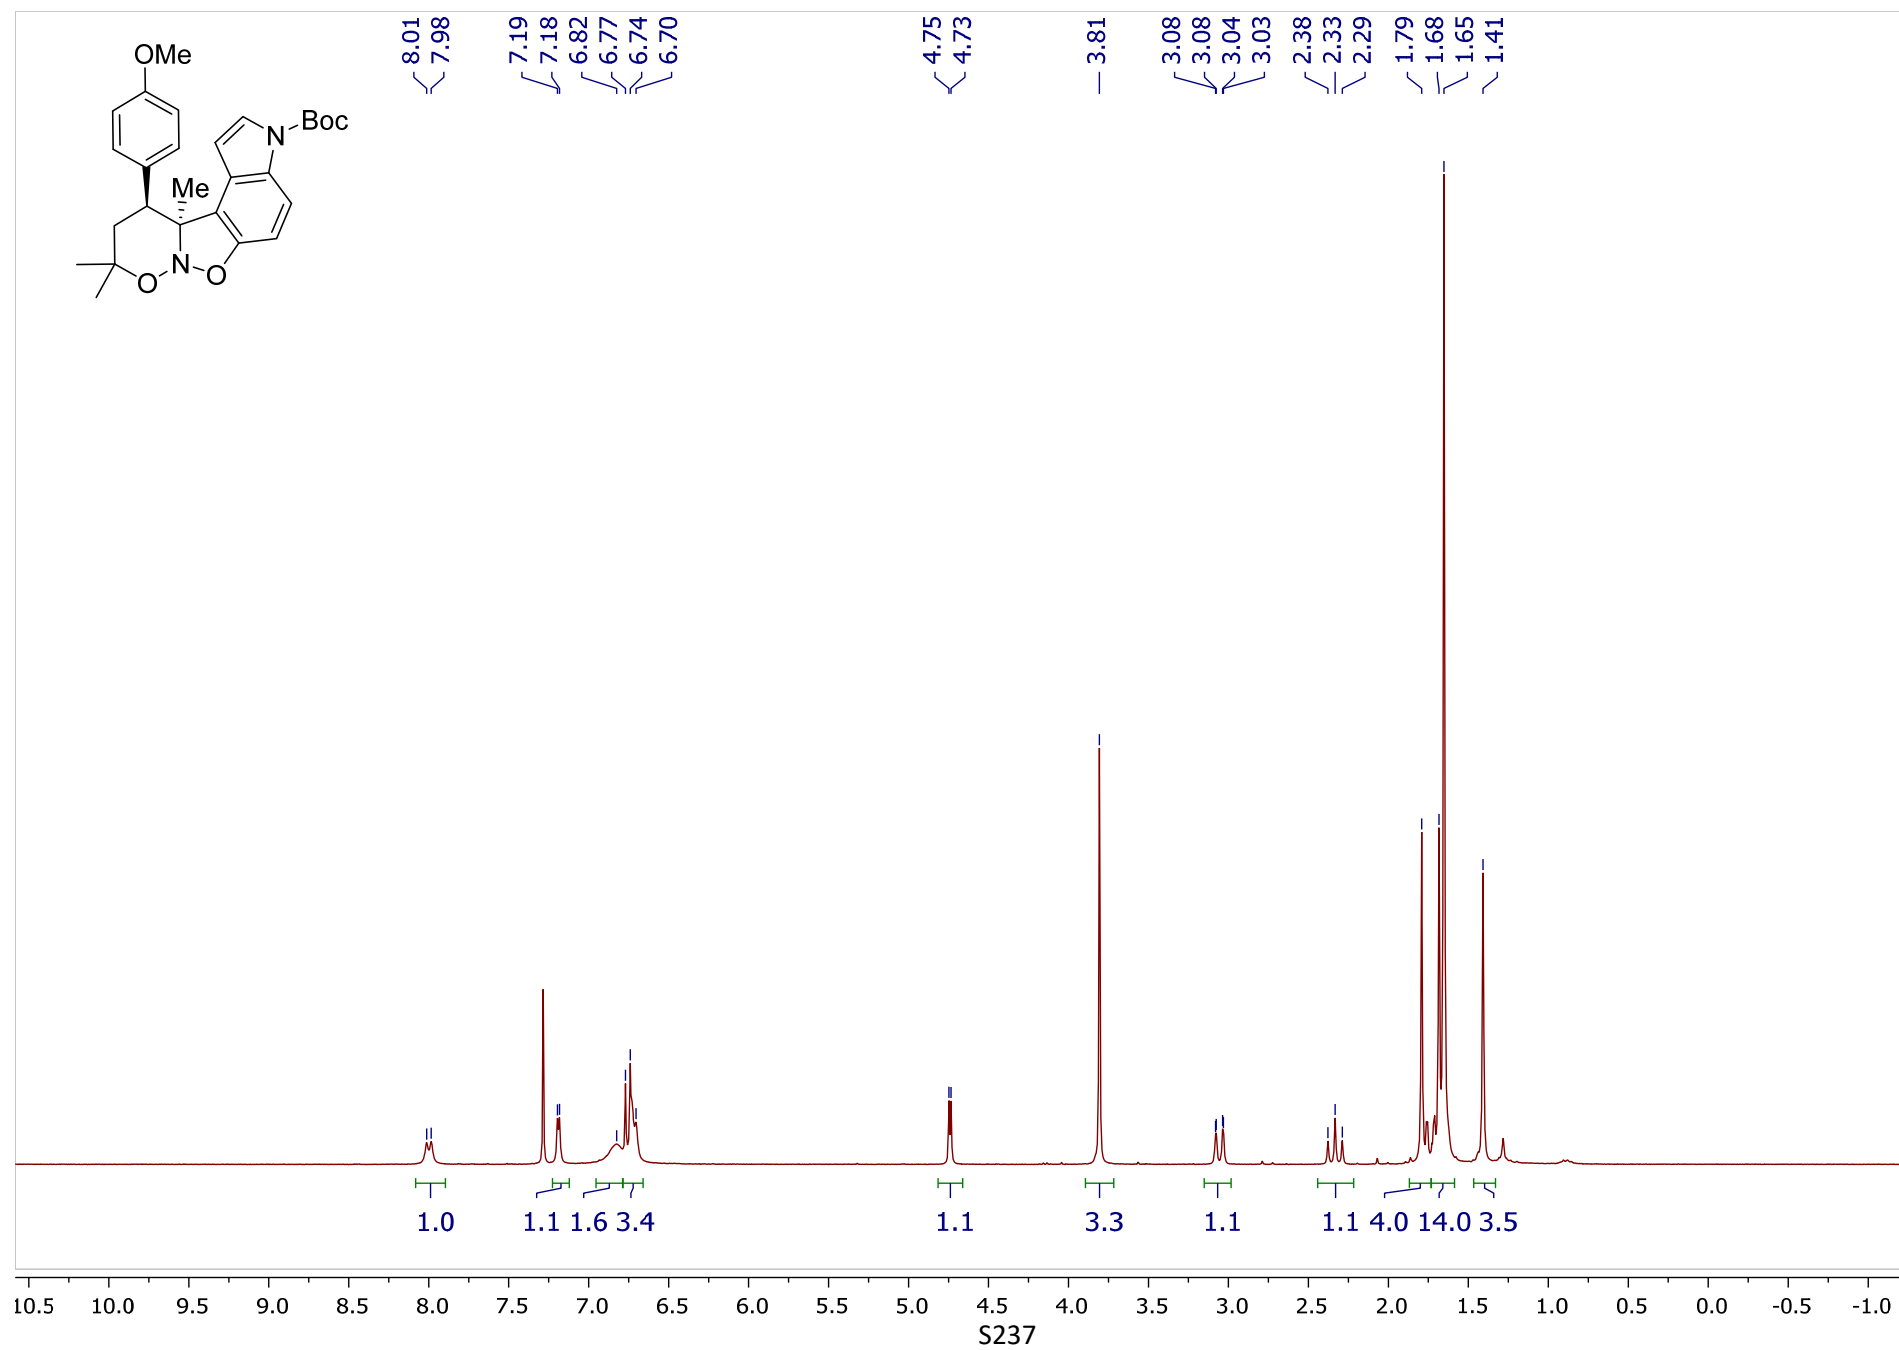

$^{13}\text{C}$  NMR (75 MHz,  $\text{CDCl}_3$ )

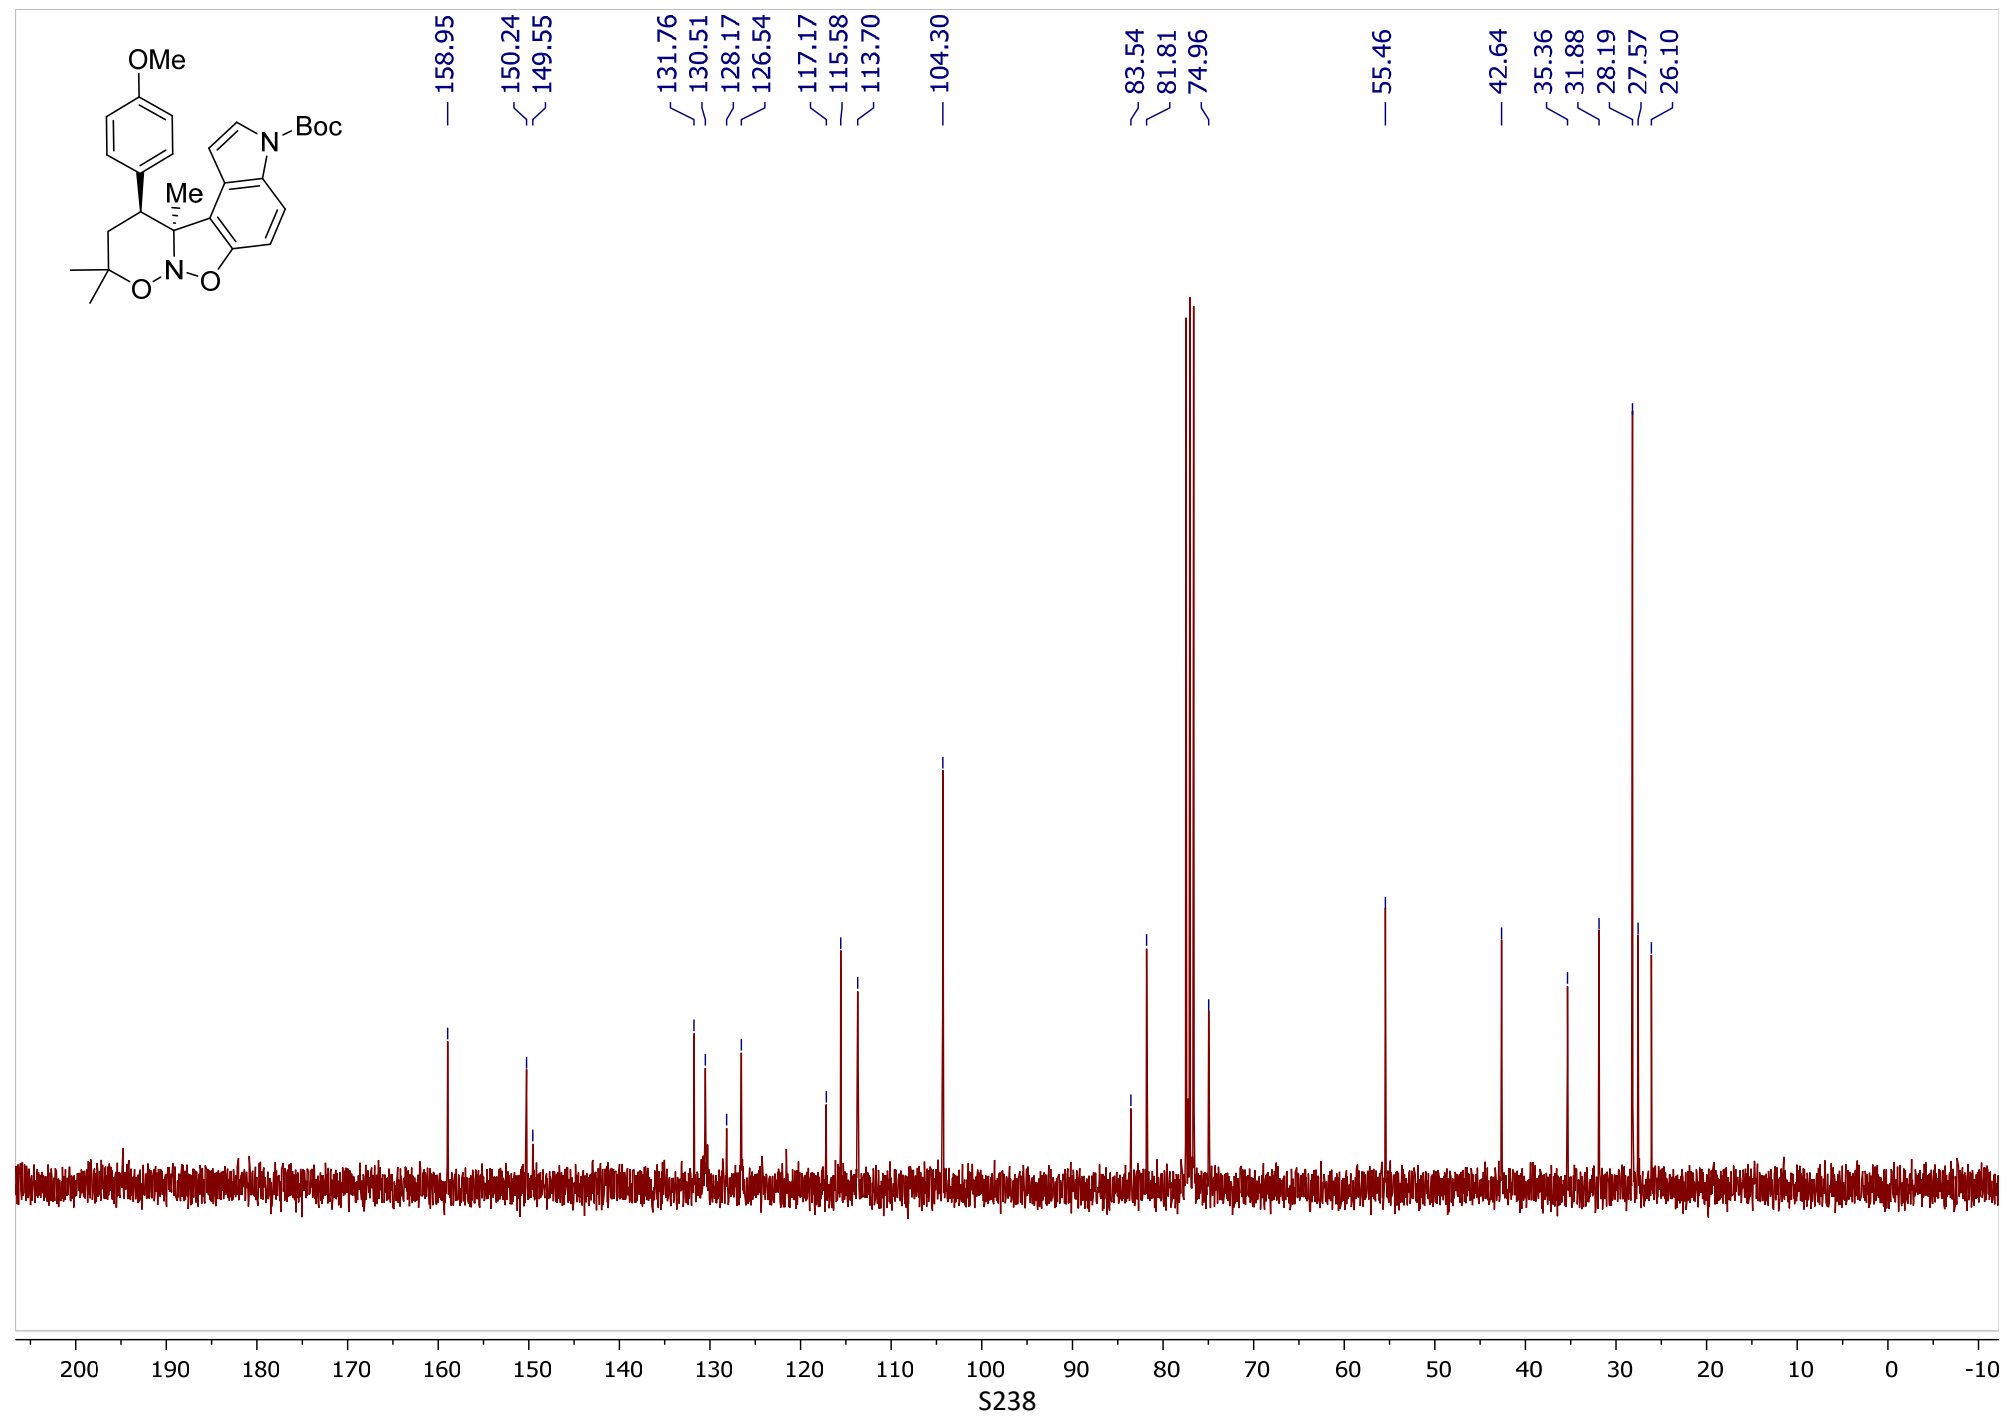

$^{13}\text{C}$  DEPT 135 (75 MHz,  $\text{CDCl}_3$ )

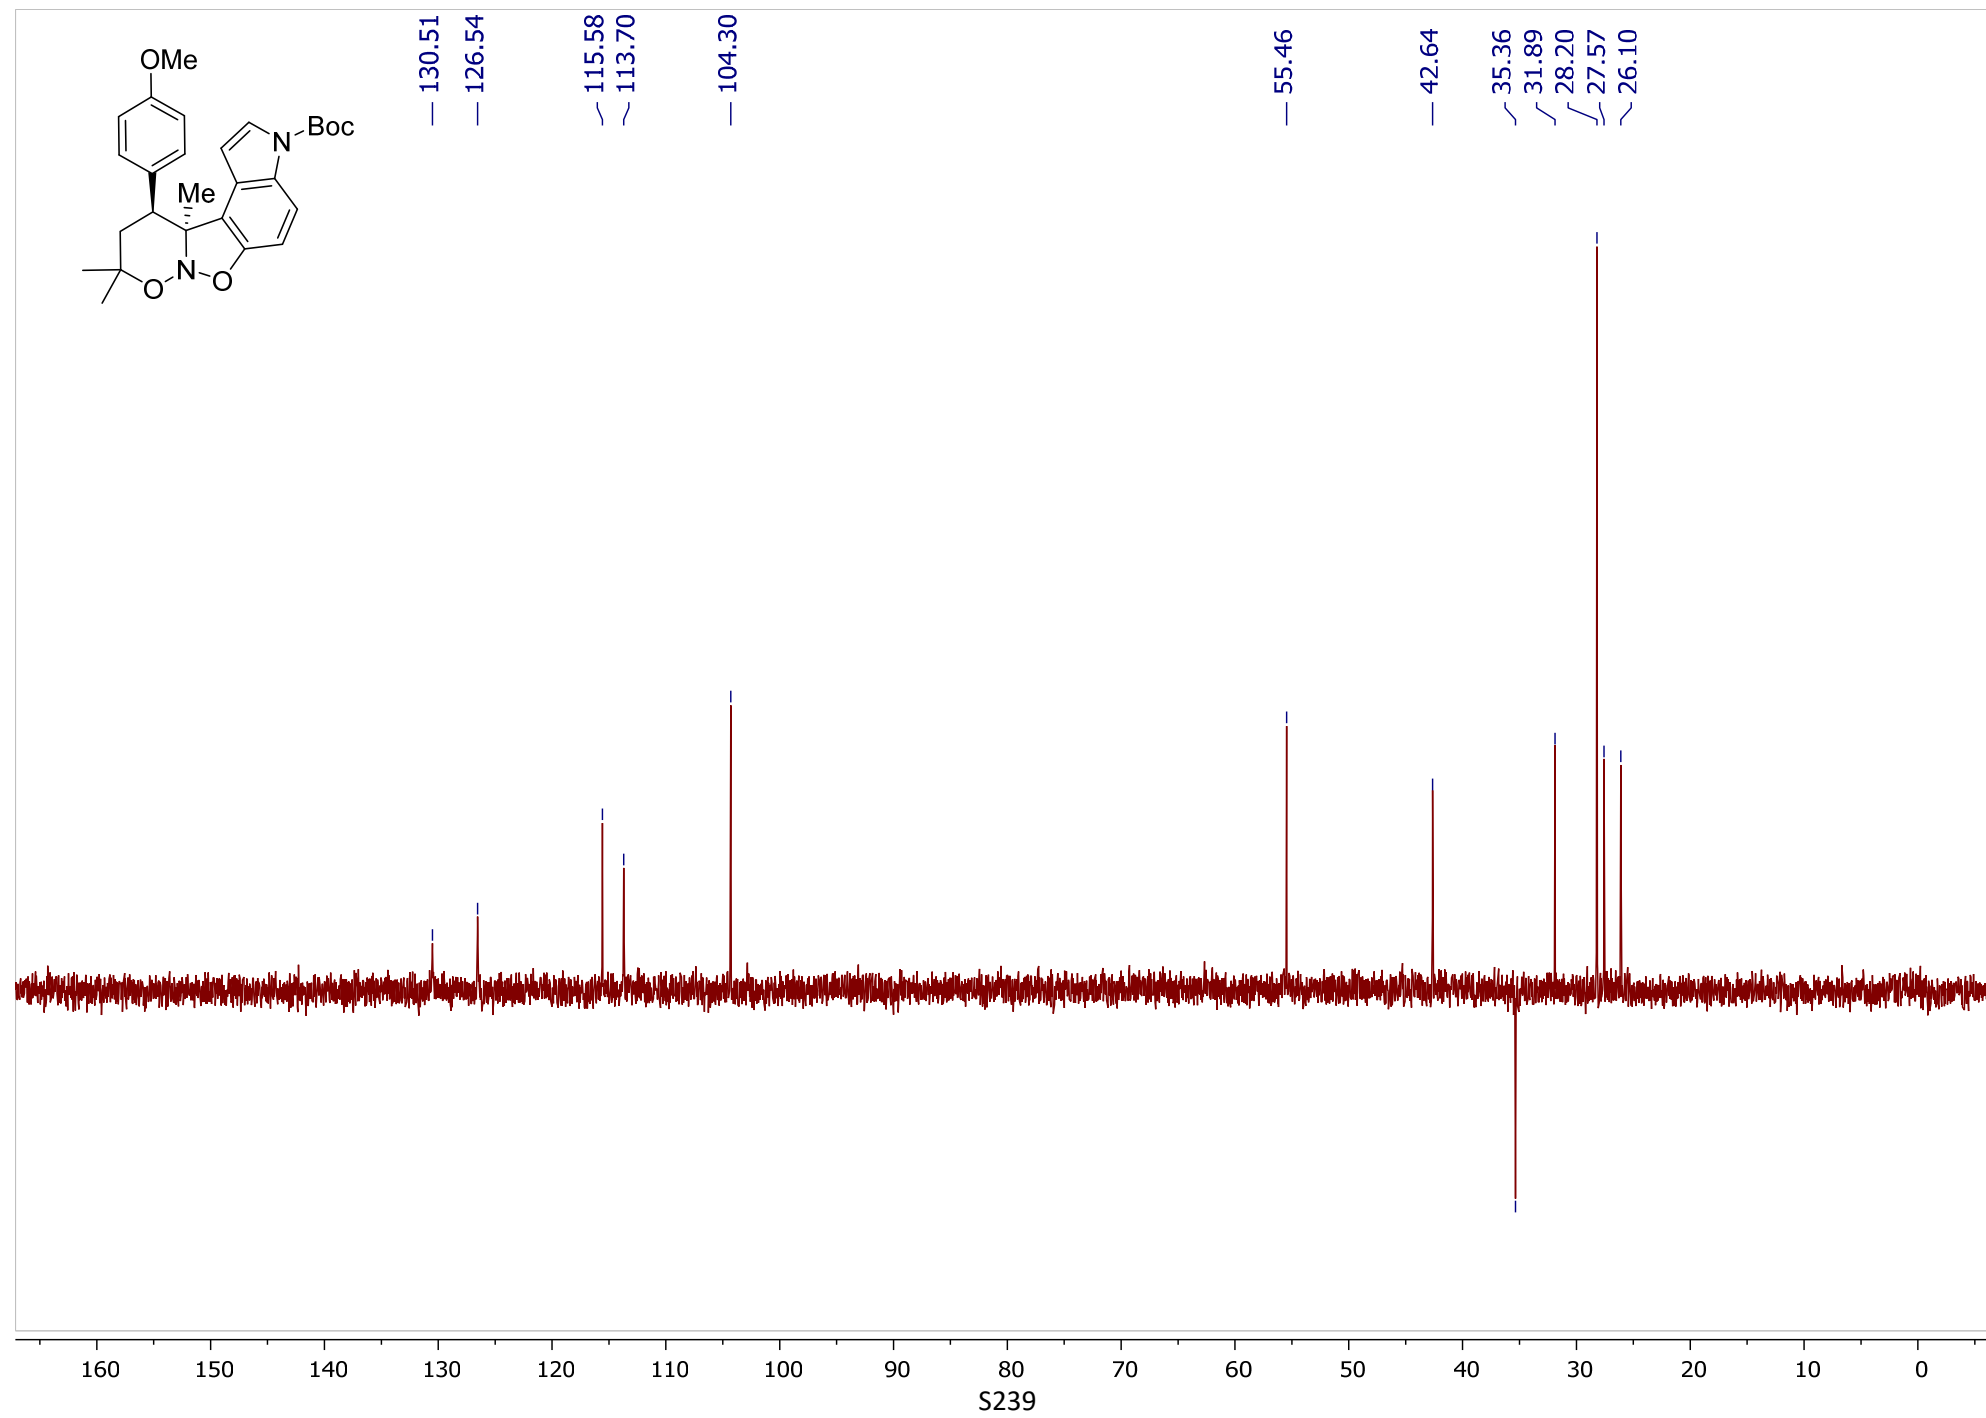

$^1\text{H}$ - $^1\text{H}$  COSY

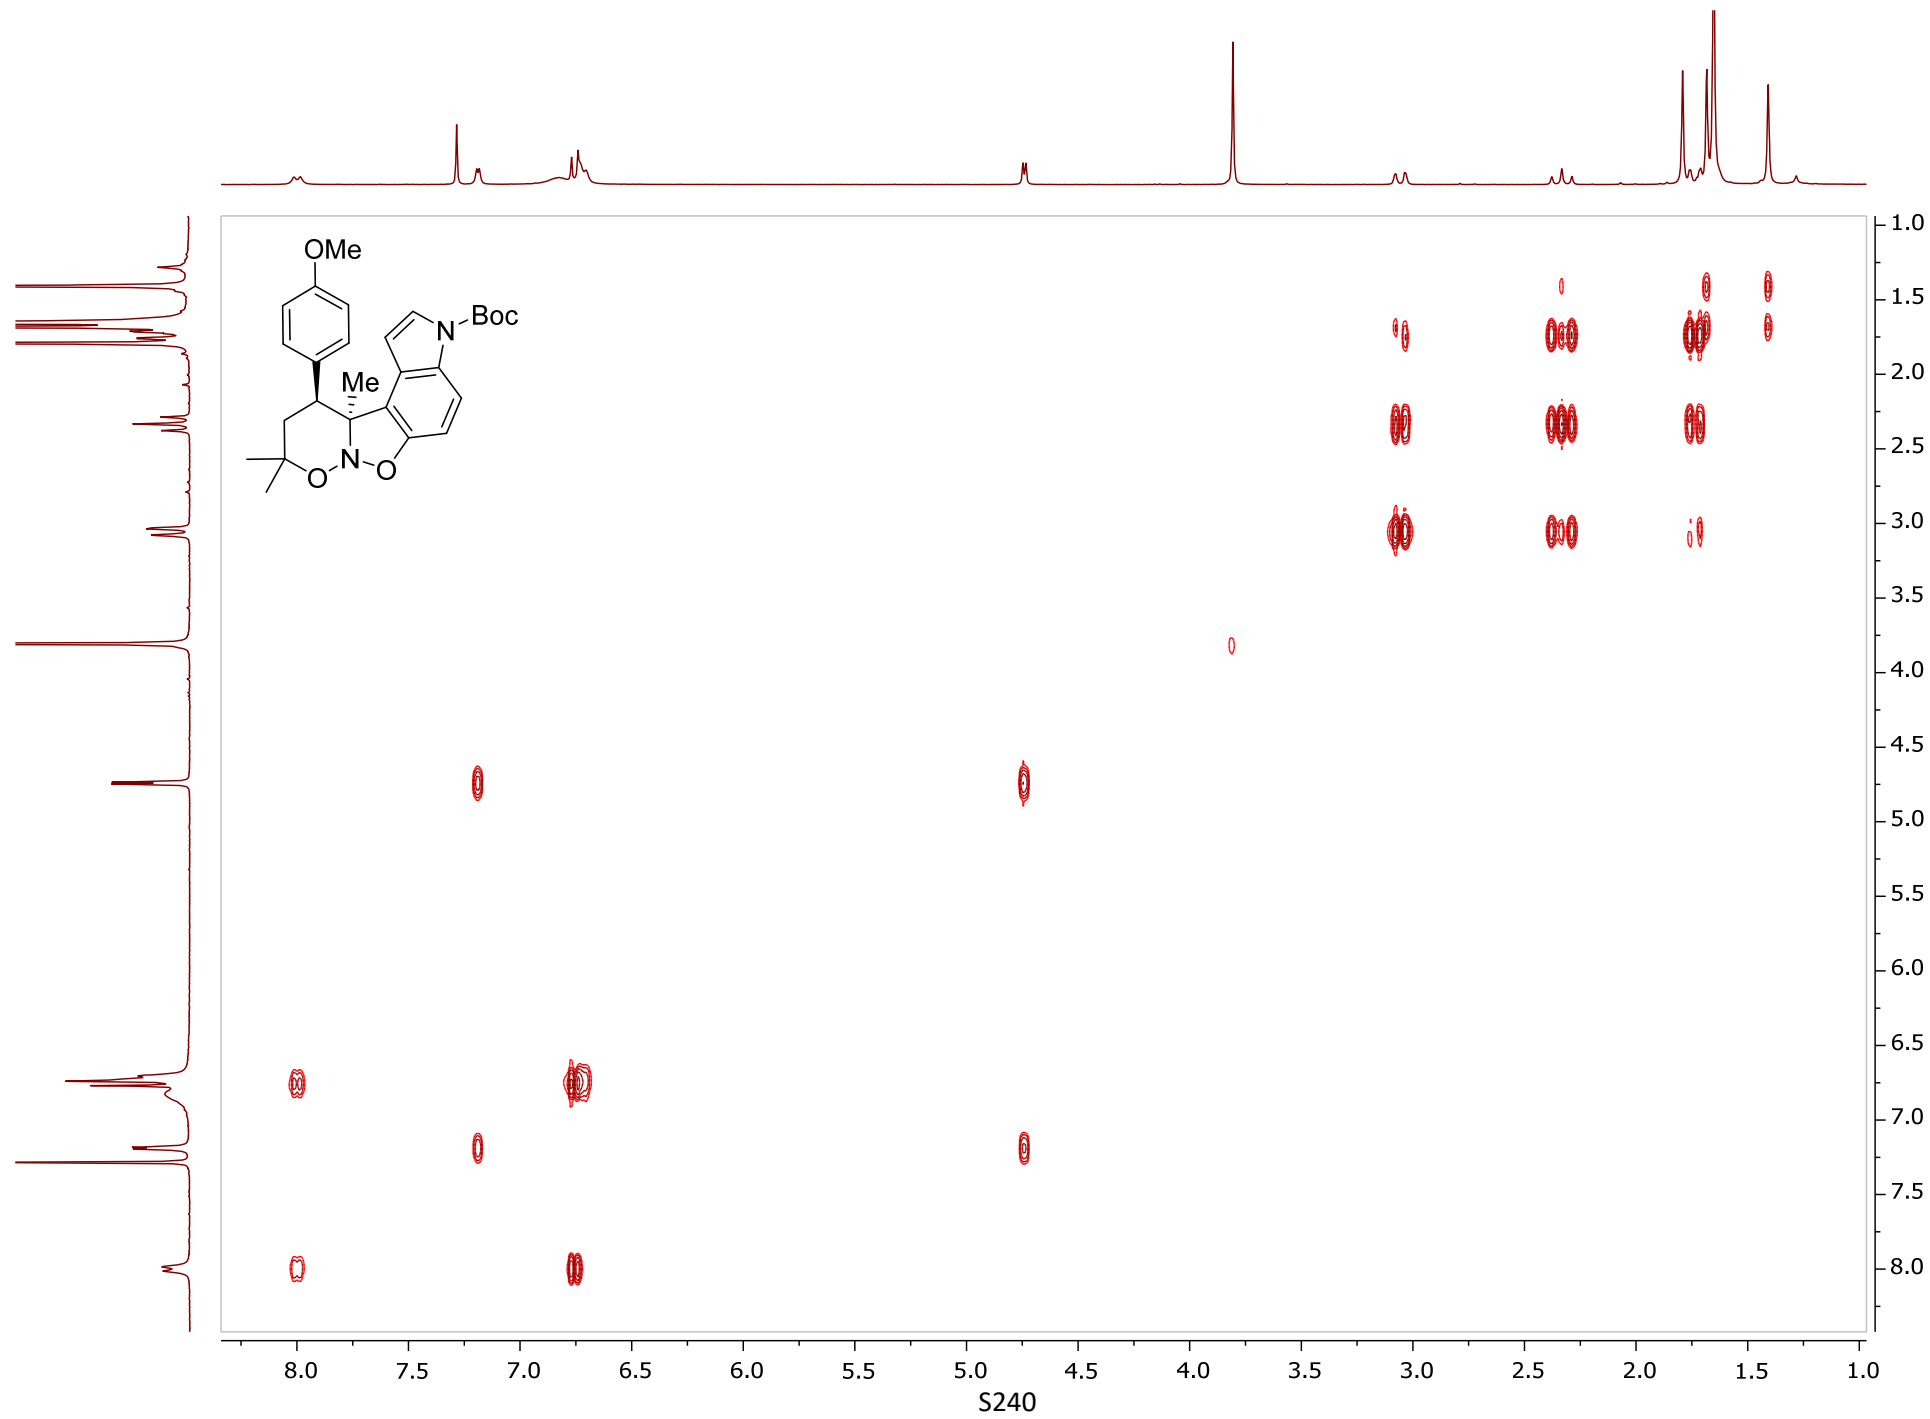



$^1\text{H}$ - $^{13}\text{C}$  HSQC

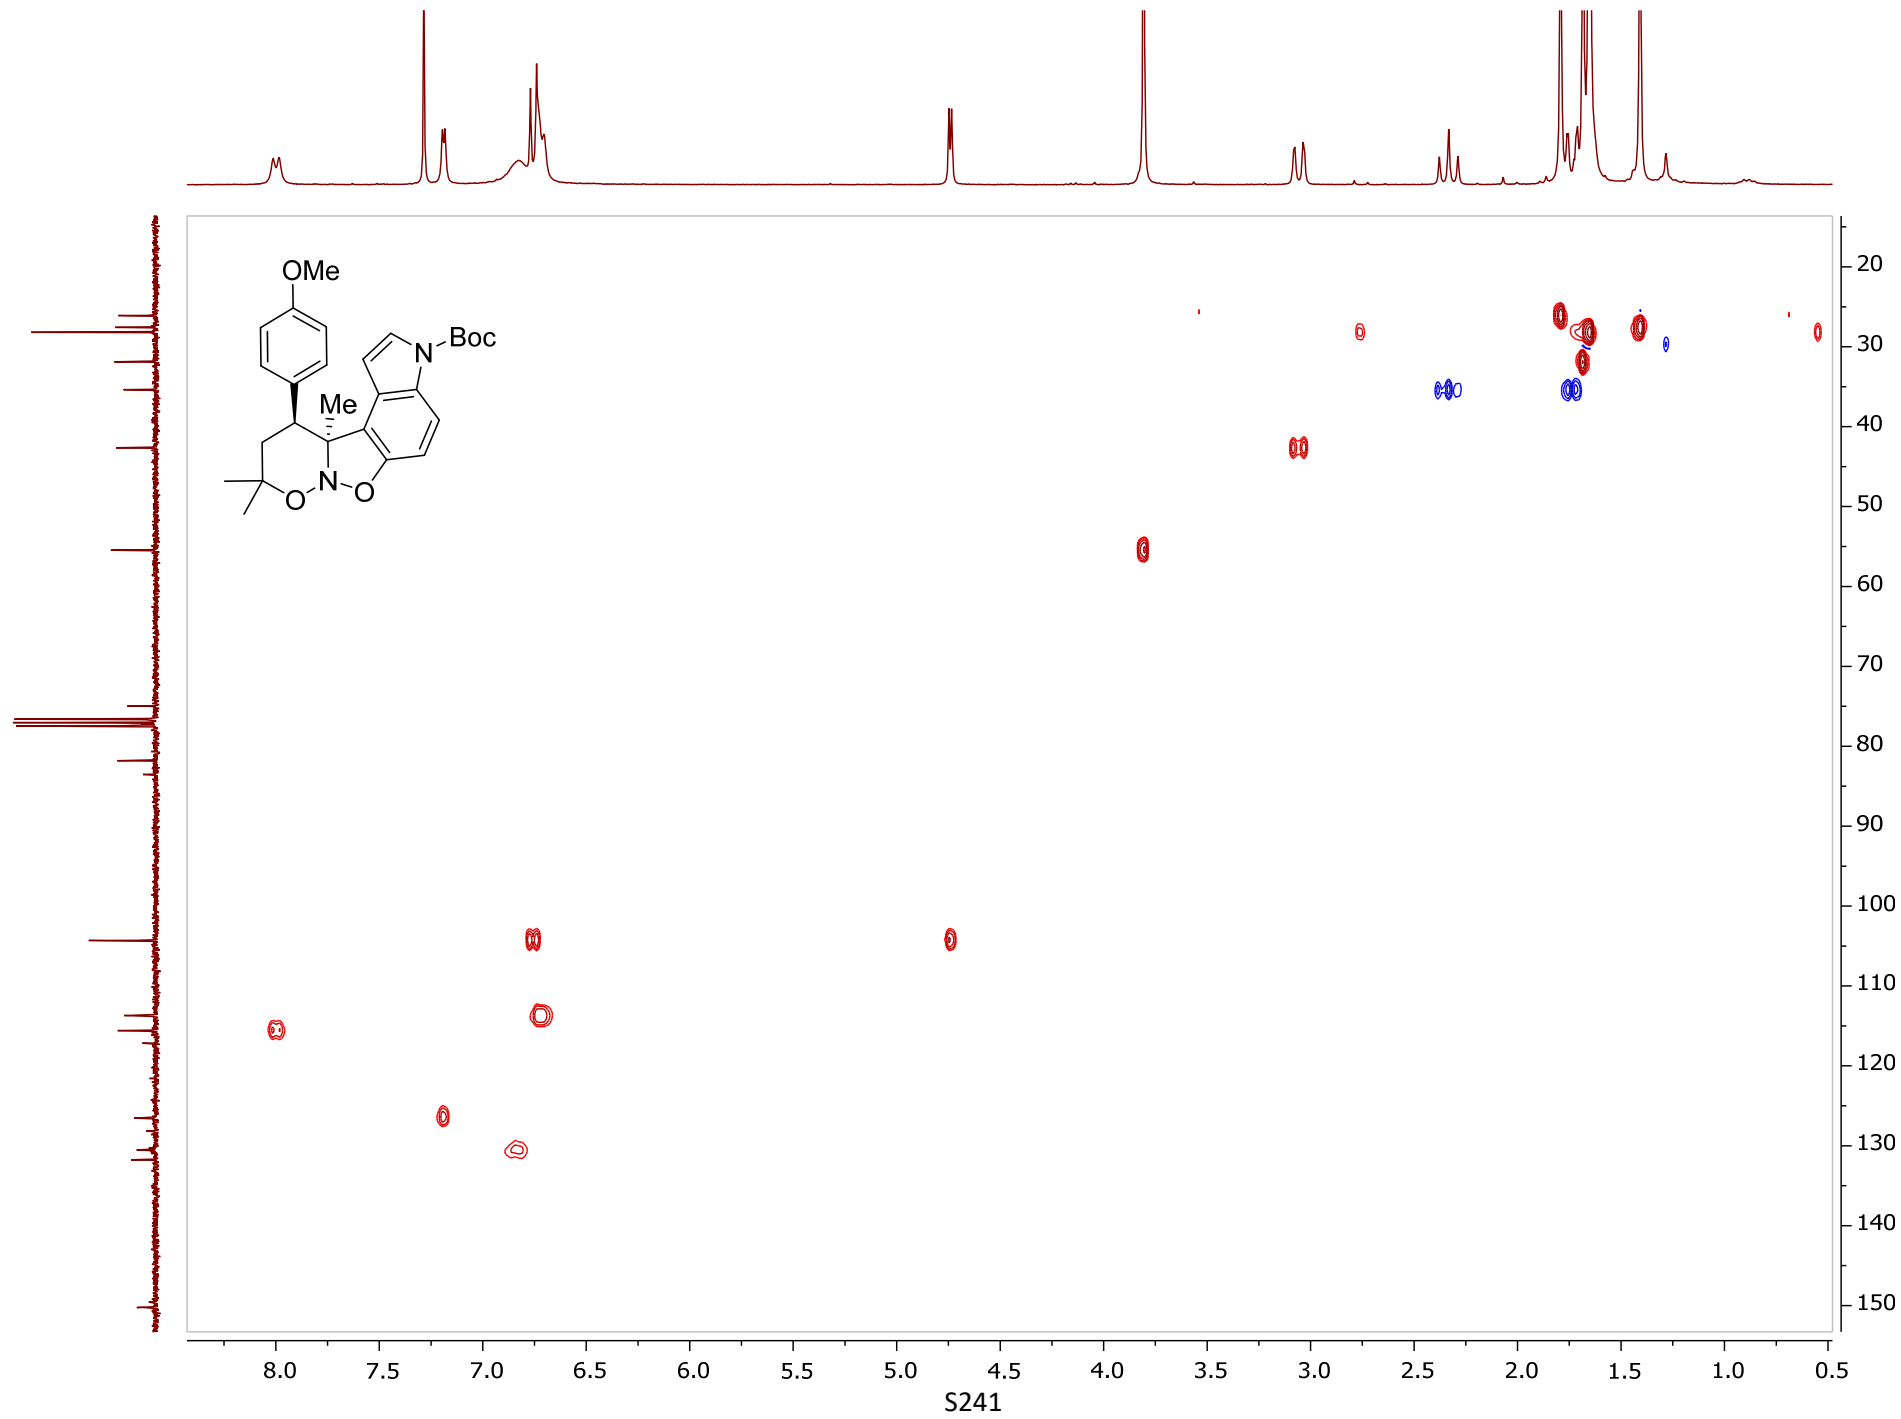

$^1\text{H}$ - $^{13}\text{C}$  HMBC

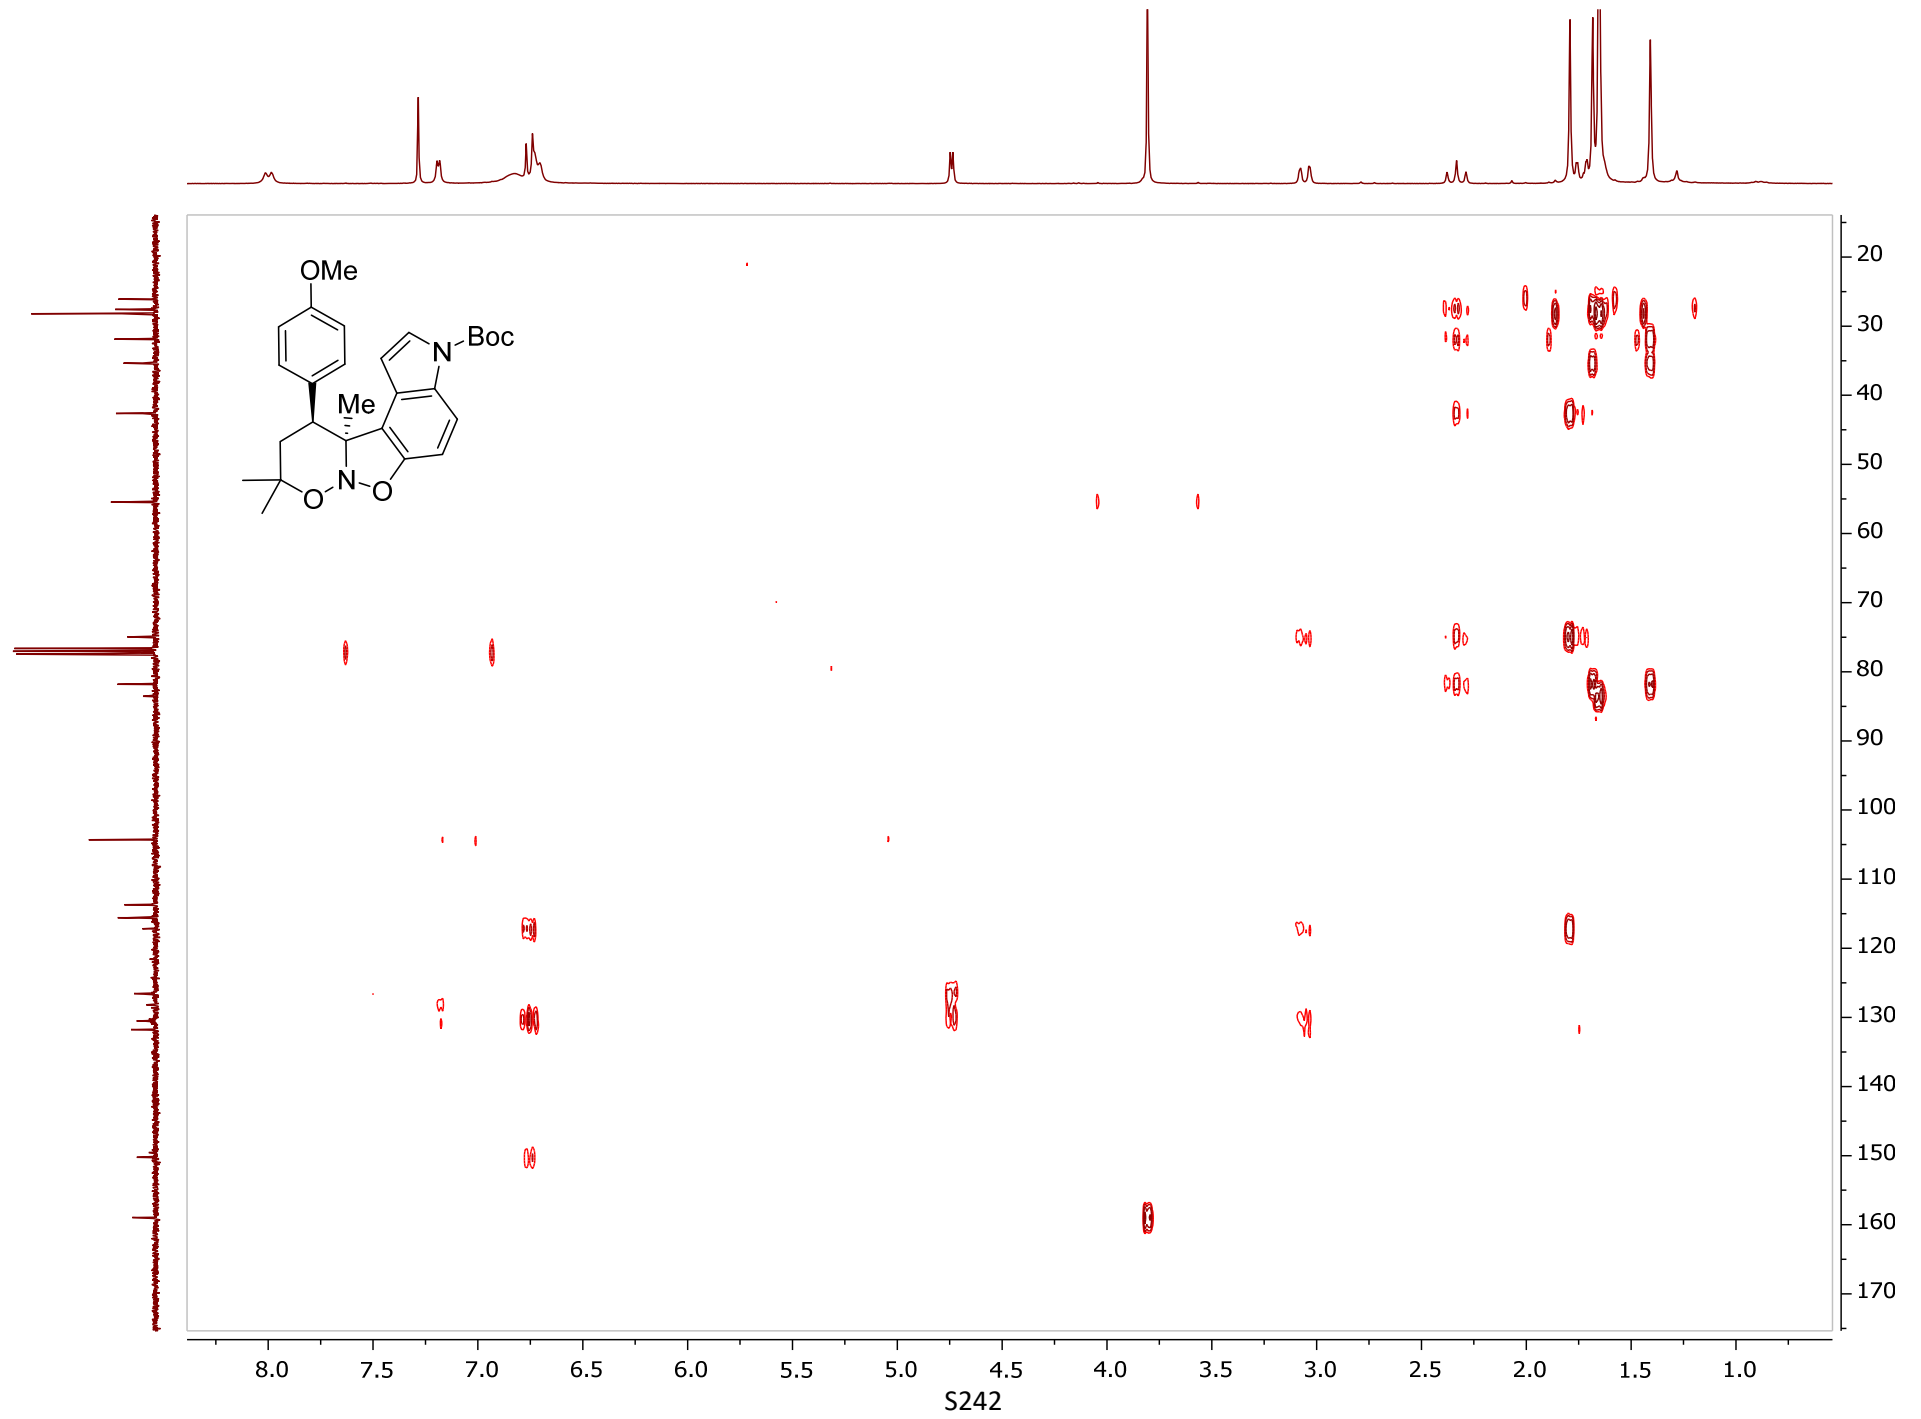

$^1\text{H}$ - $^1\text{H}$  NOESY

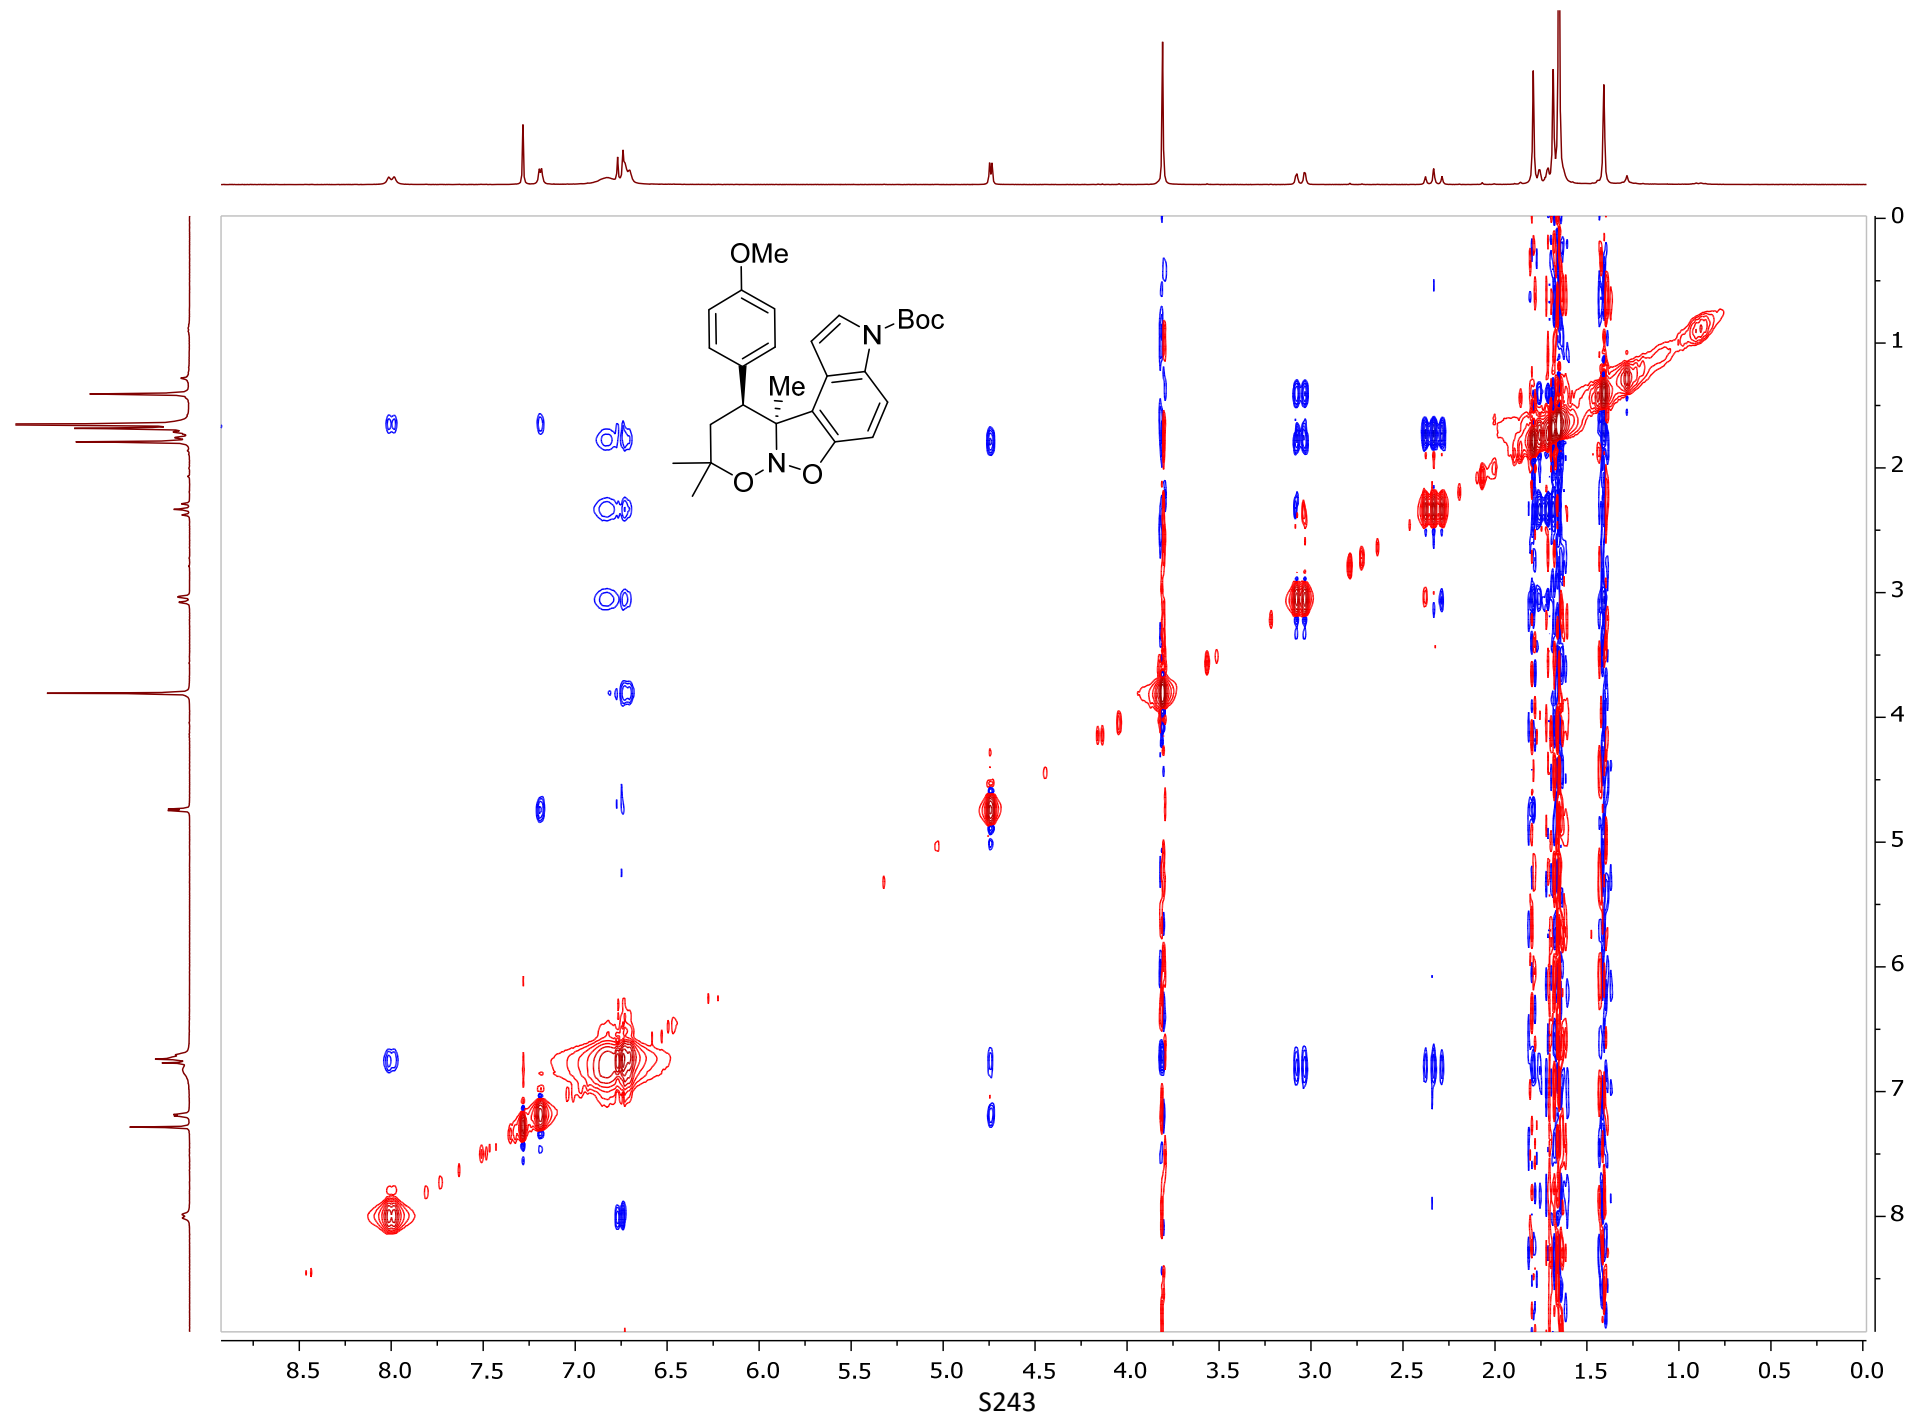

5-Methoxy-4-(4-methoxyphenyl)-2,2,4a-trimethyl-2,3,4,4a-tetrahydrobenzo[4,5]isoxazolo[2,3-b][1,2]oxazine (*trans*-5af/*cis*-5af = 2.1:1)

<sup>1</sup>H NMR (300 MHz, CDCl<sub>3</sub>)

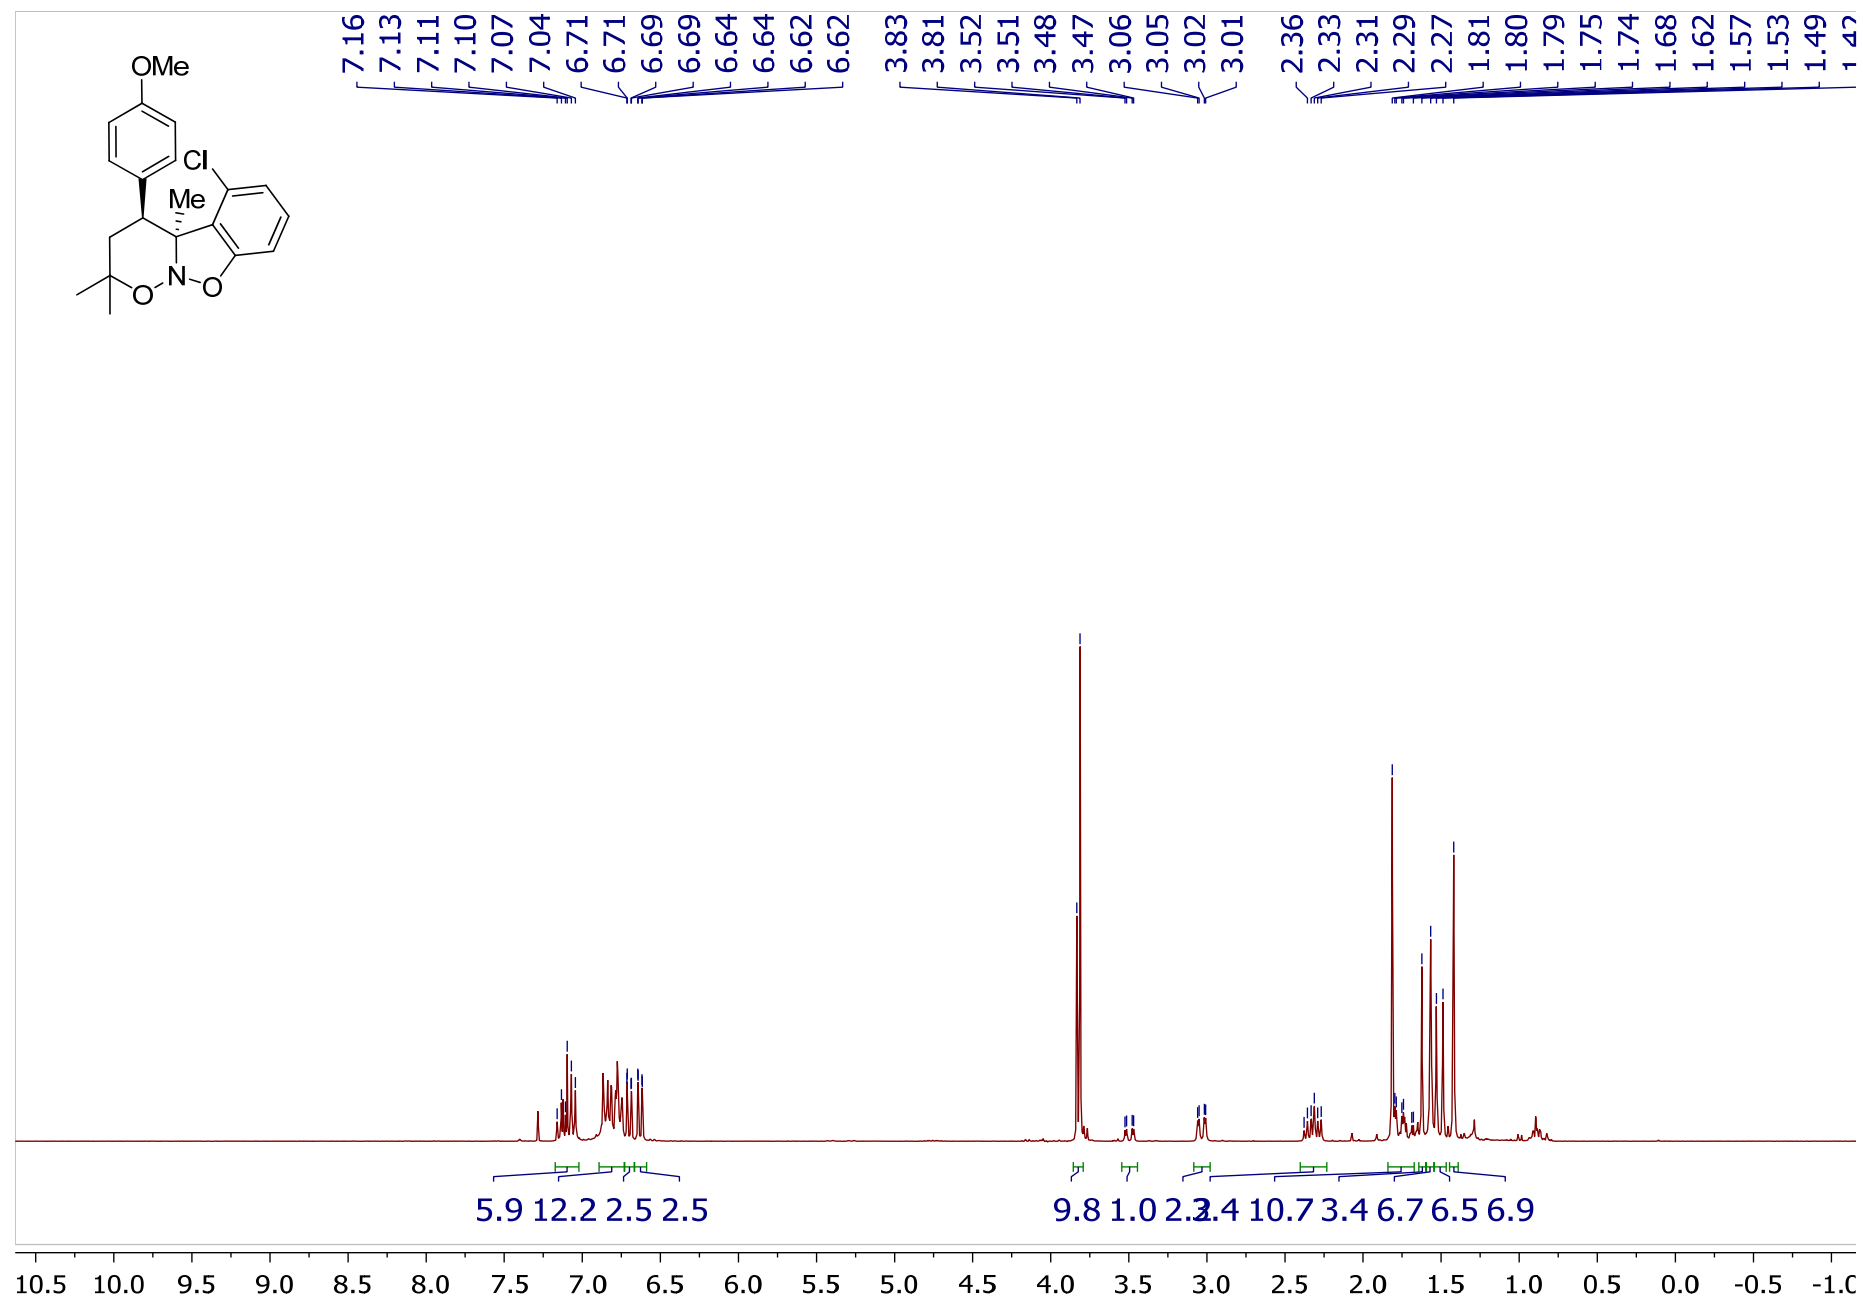

$^{13}\text{C}$  NMR (75 MHz,  $\text{CDCl}_3$ )

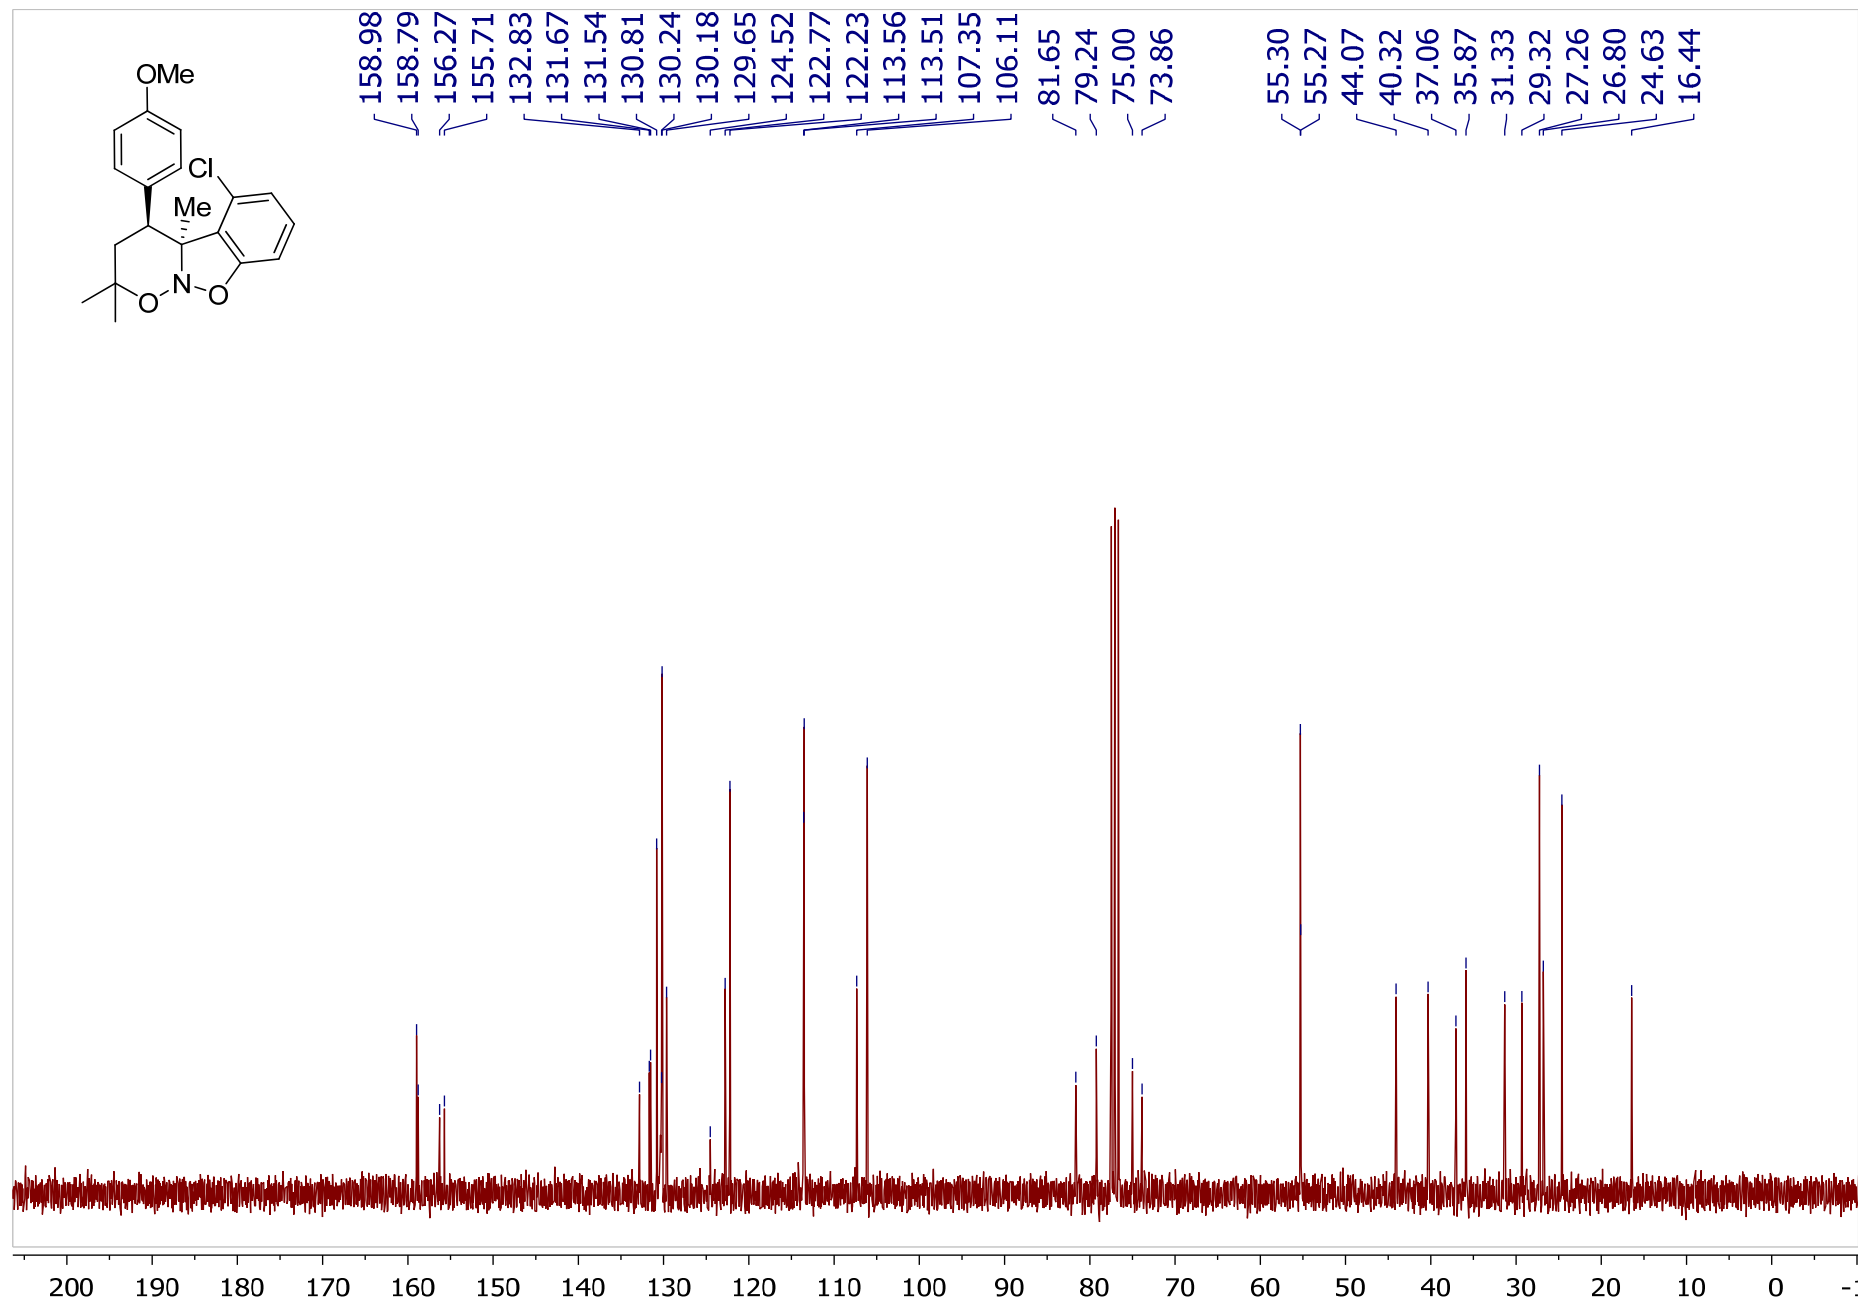

<sup>13</sup>C DEPT 135 (75 MHz, CDCl<sub>3</sub>)

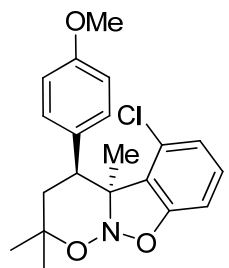

130.81  
130.18  
129.65  
122.78  
122.23  
113.56  
113.51  
107.35  
106.11

55.30  
55.27  
44.07  
40.32  
37.06  
35.87  
31.34  
29.32  
27.26  
26.80  
24.63  
16.44

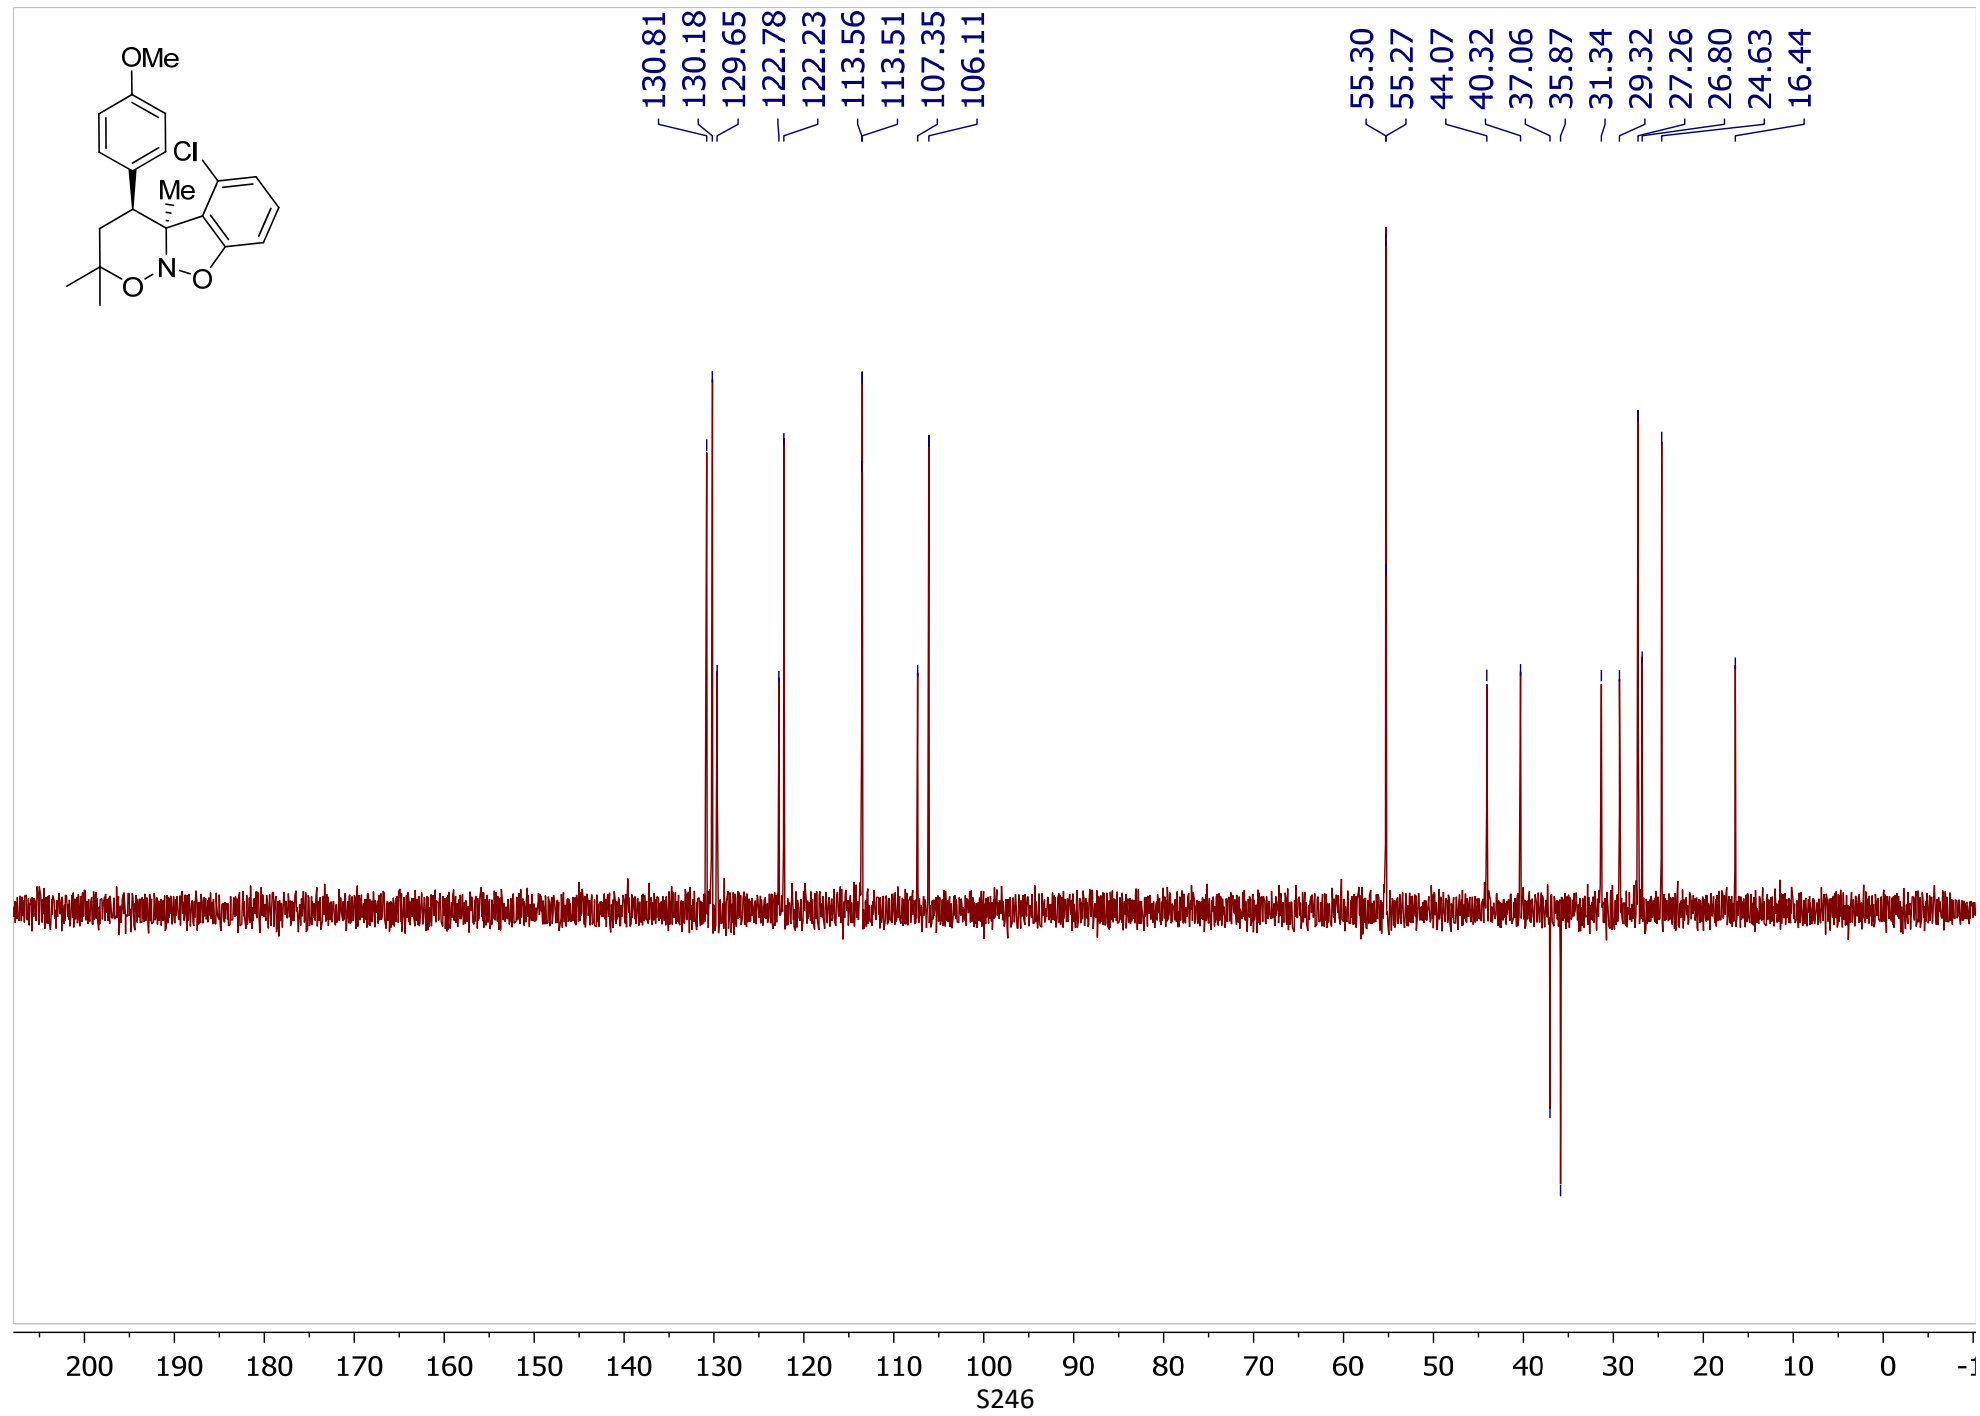

$^1\text{H}$ - $^1\text{H}$  COSY

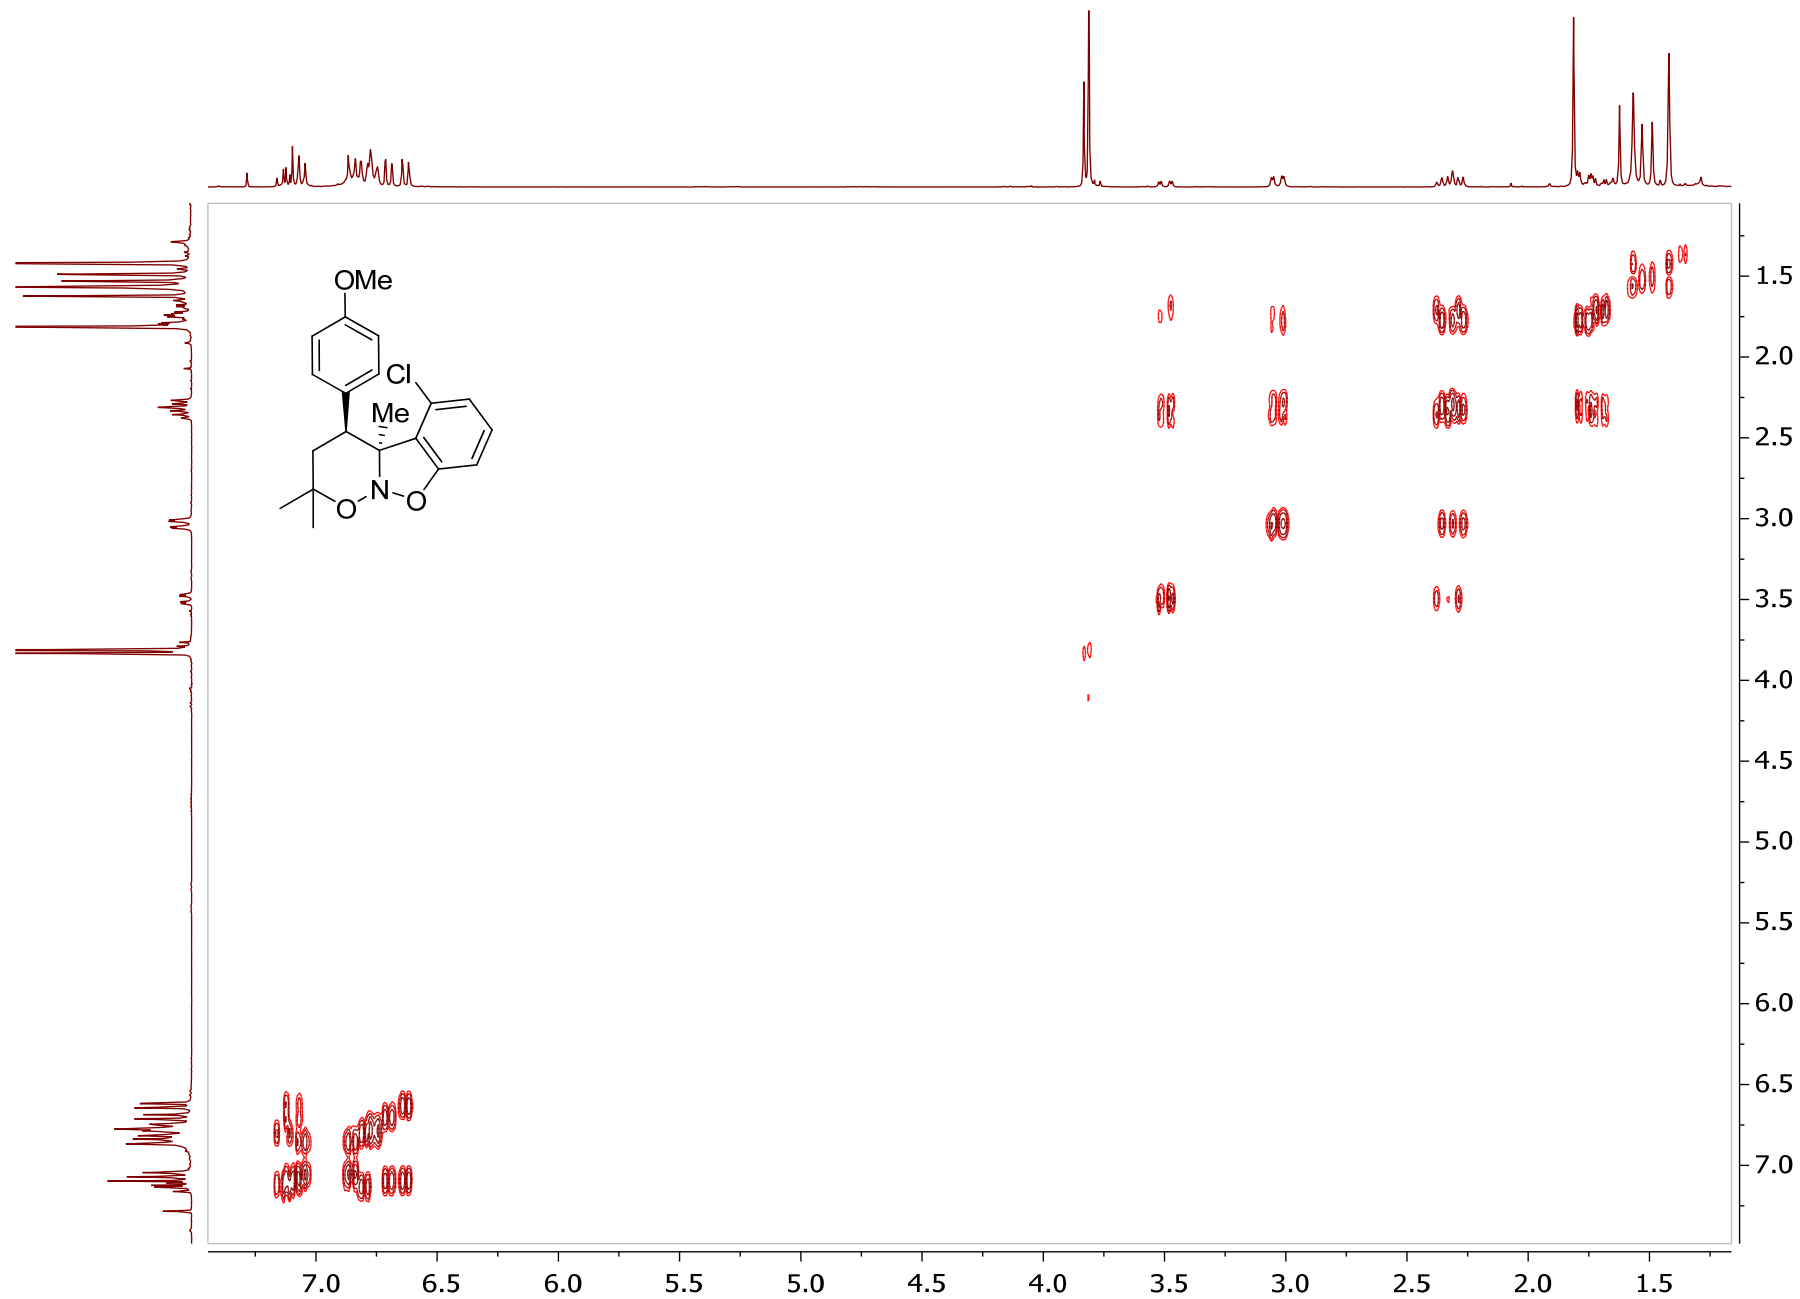

$^1\text{H}-^{13}\text{C}$  HSQC

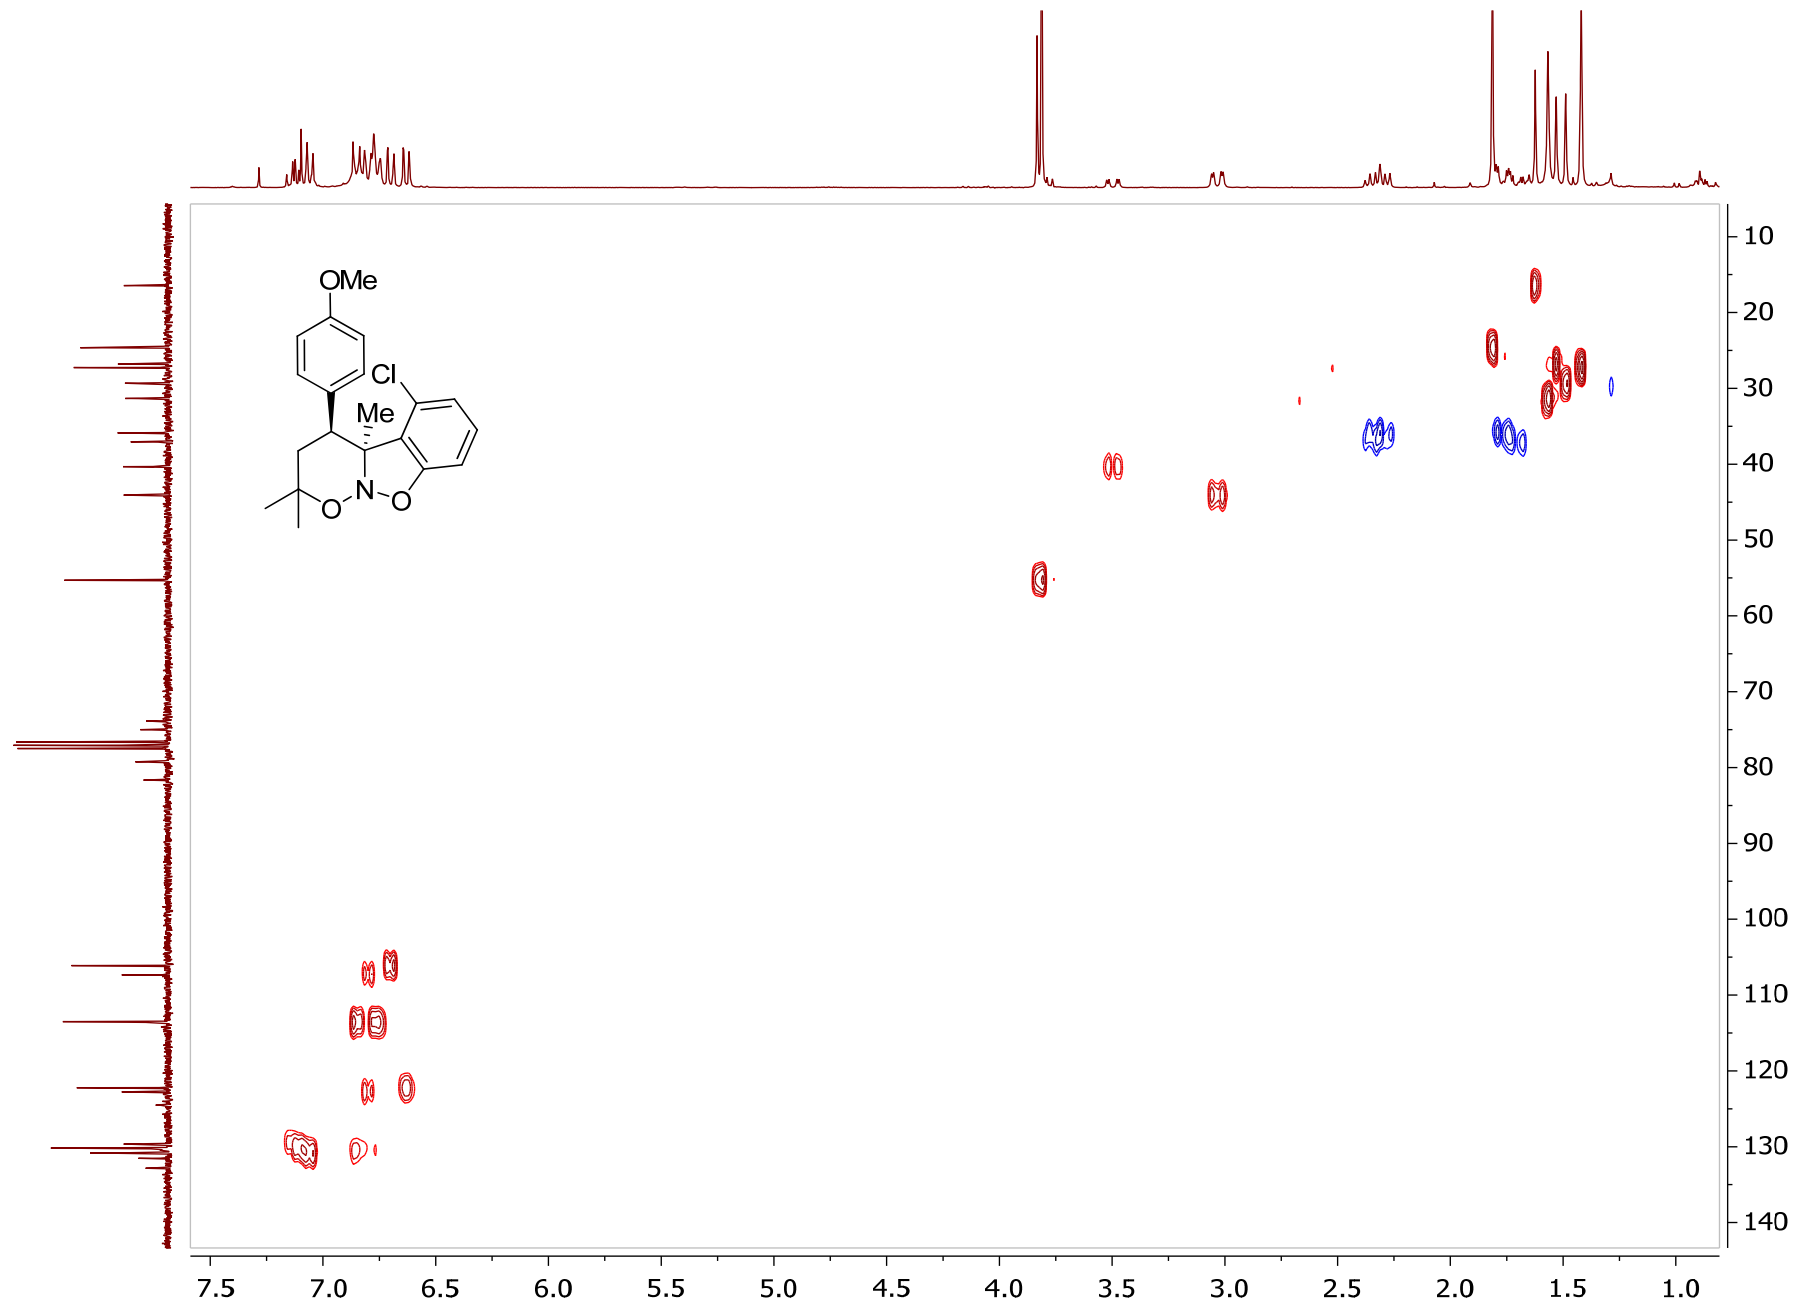

$^1\text{H}-^{13}\text{C}$  HMBC



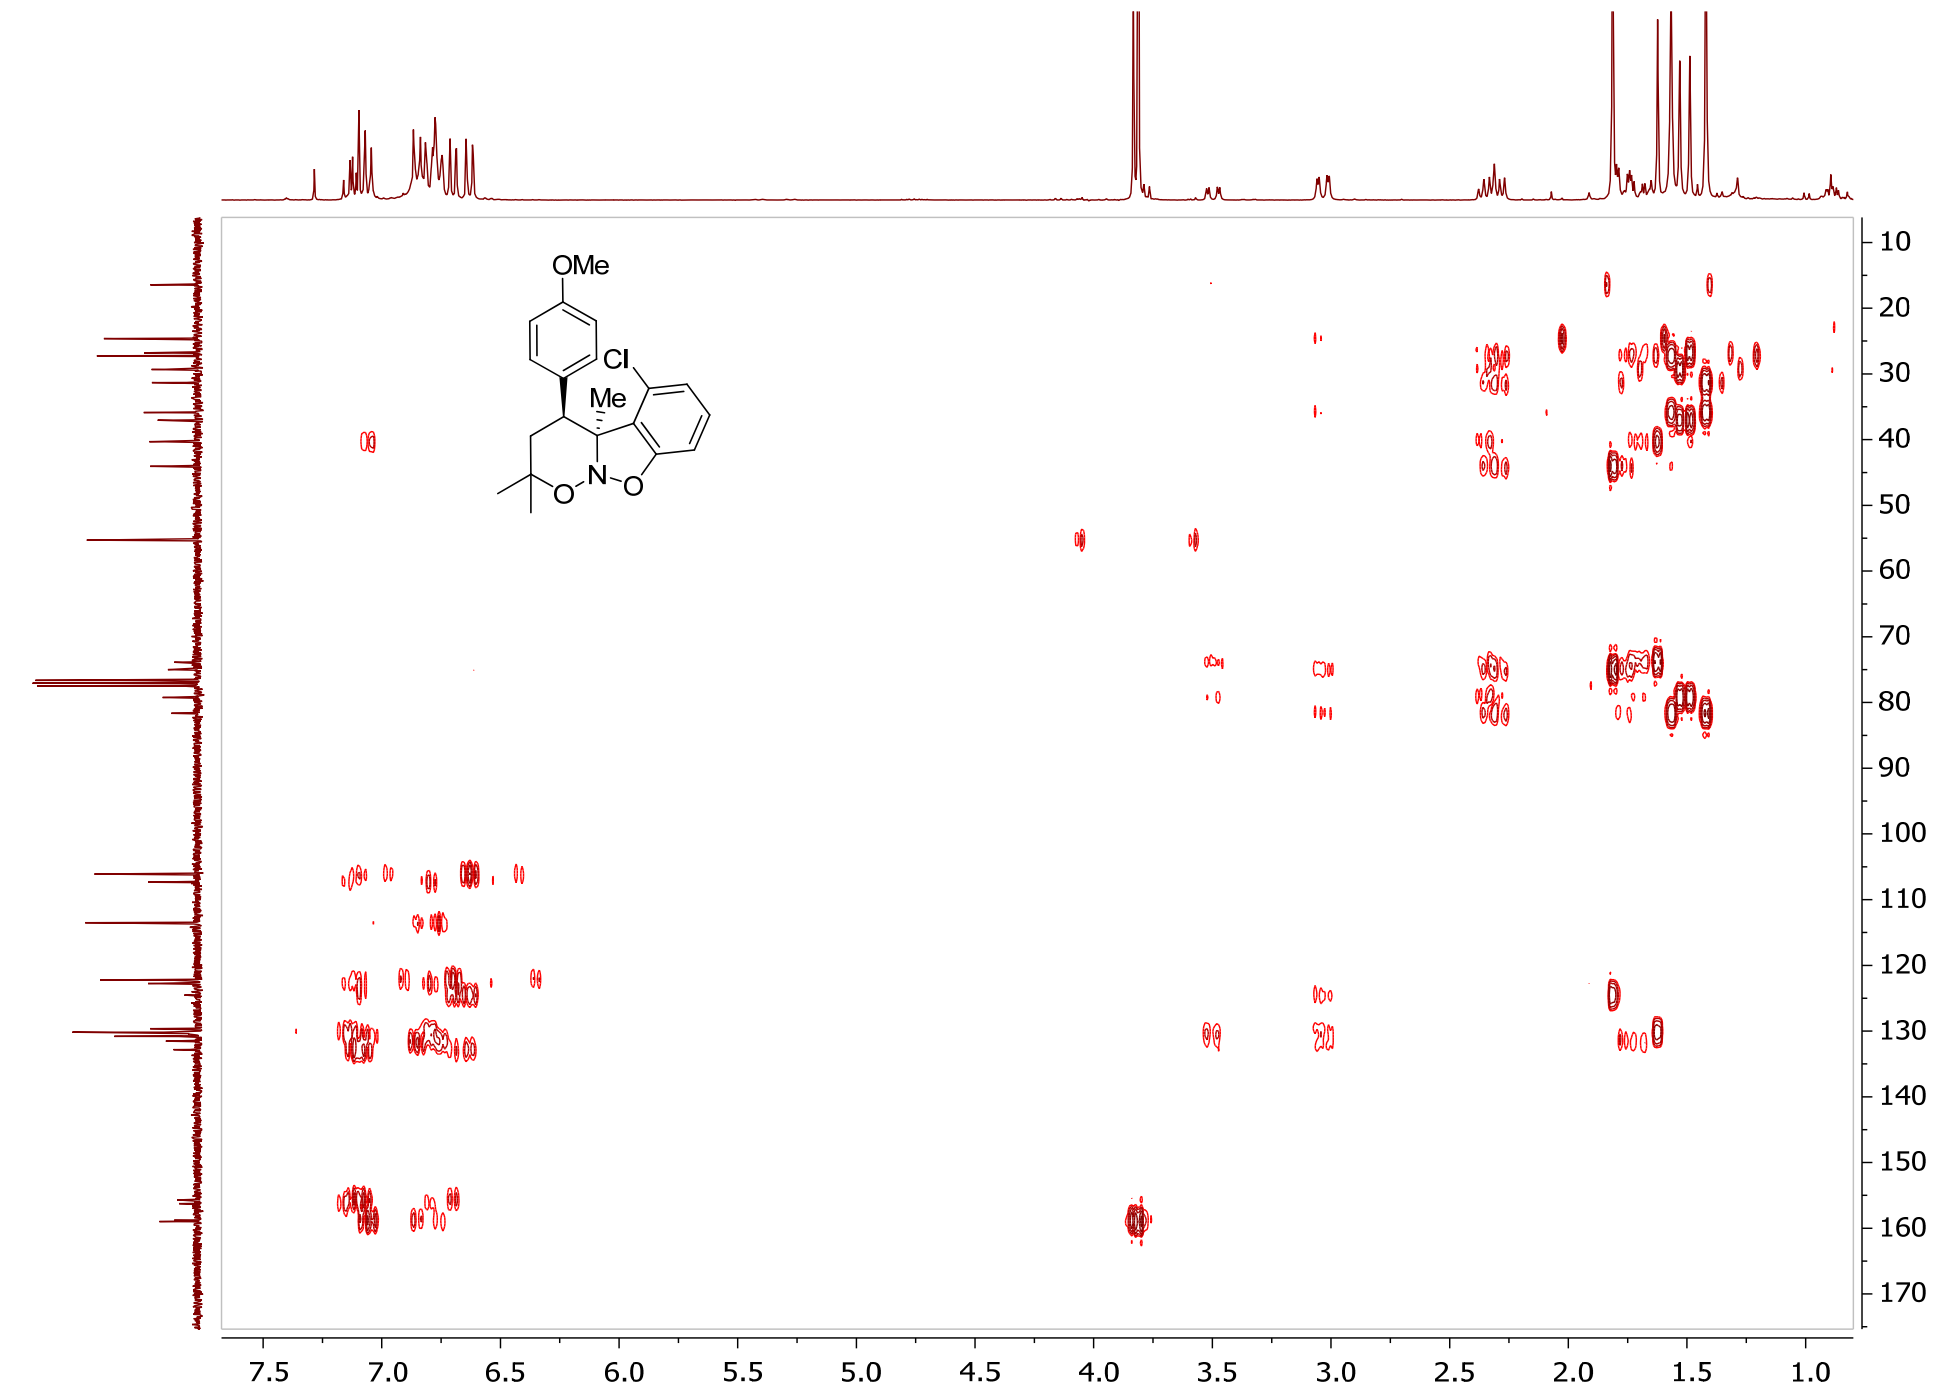

$^1\text{H}$ - $^1\text{H}$  NOESY

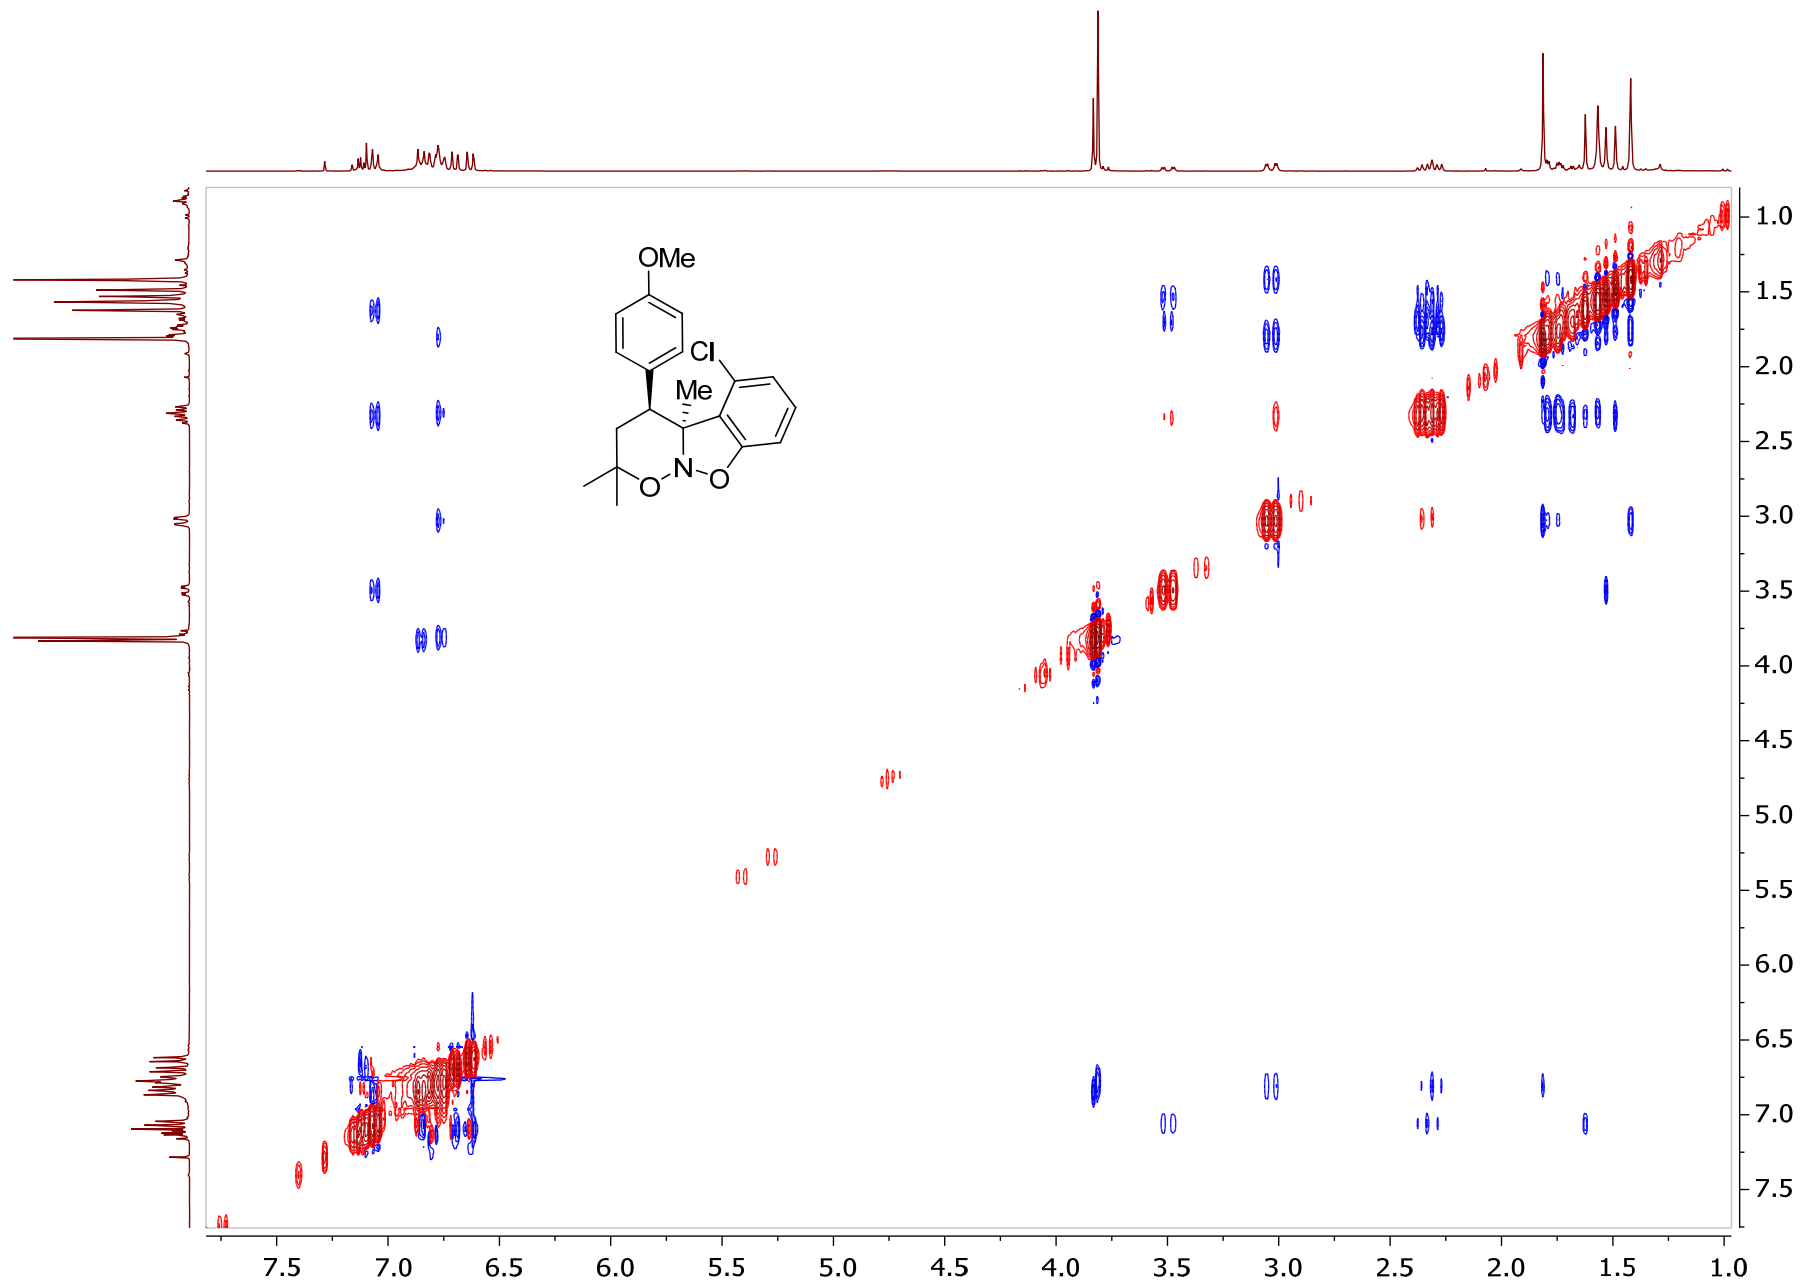

**(4*S*\*,4*aS*\*)-5-Methoxy-4-(4-methoxyphenyl)-2,2,4*a*-trimethyl-2,3,4,4*a*-tetrahydrobenzo[4,5]isoxazolo[2,3-*b*][1,2]oxazine (*trans*-5*ag*)**

<sup>1</sup>H NMR (300 MHz, CDCl<sub>3</sub>)

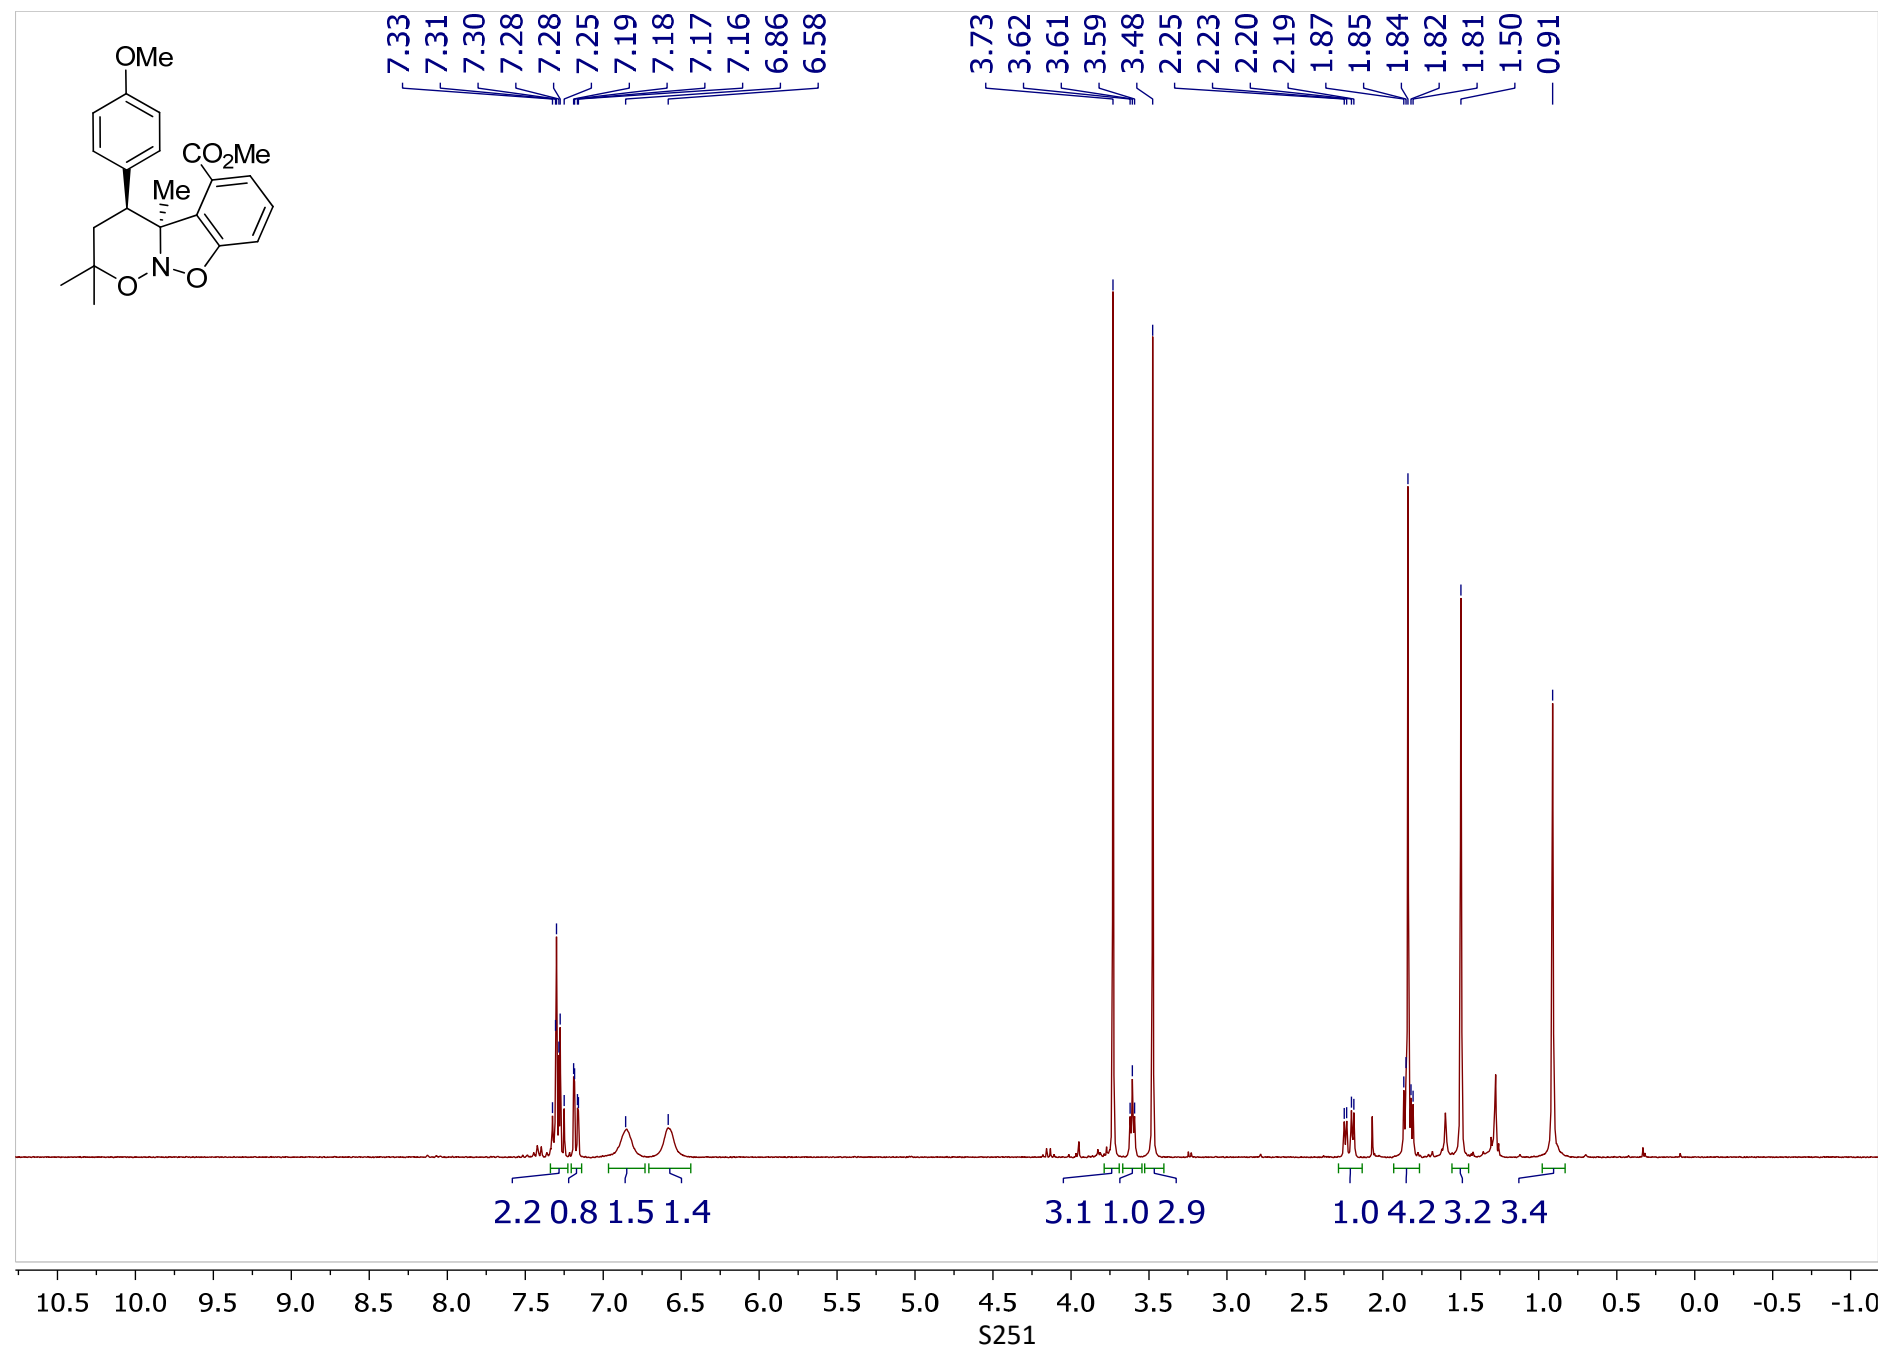

<sup>13</sup>C NMR (75 MHz, CDCl<sub>3</sub>)

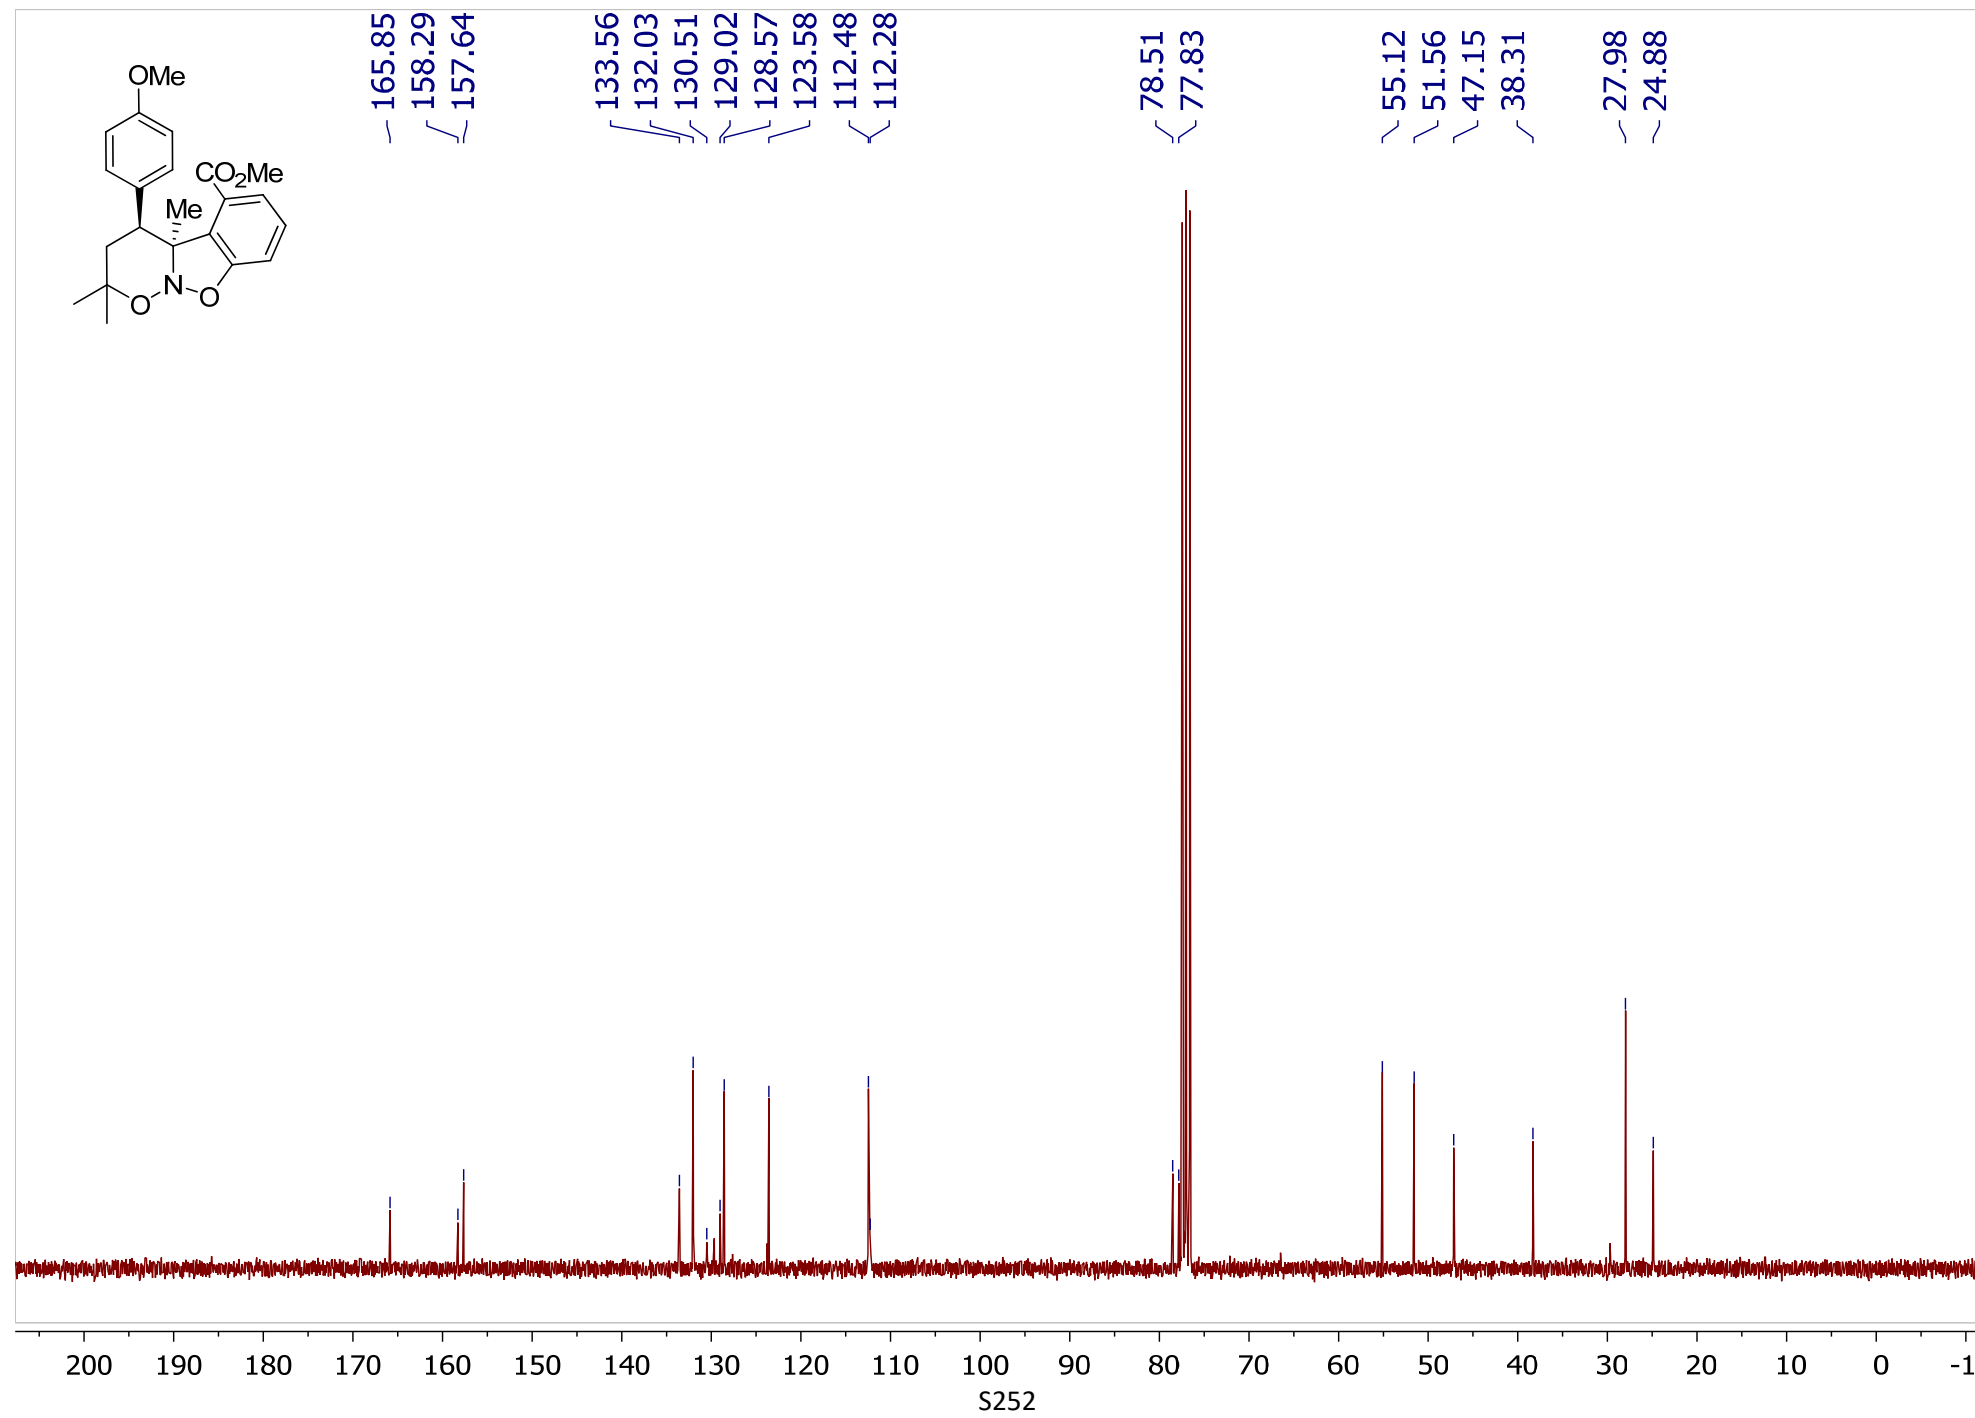

$^{13}\text{C}$  DEPT 135 (75 MHz,  $\text{CDCl}_3$ )

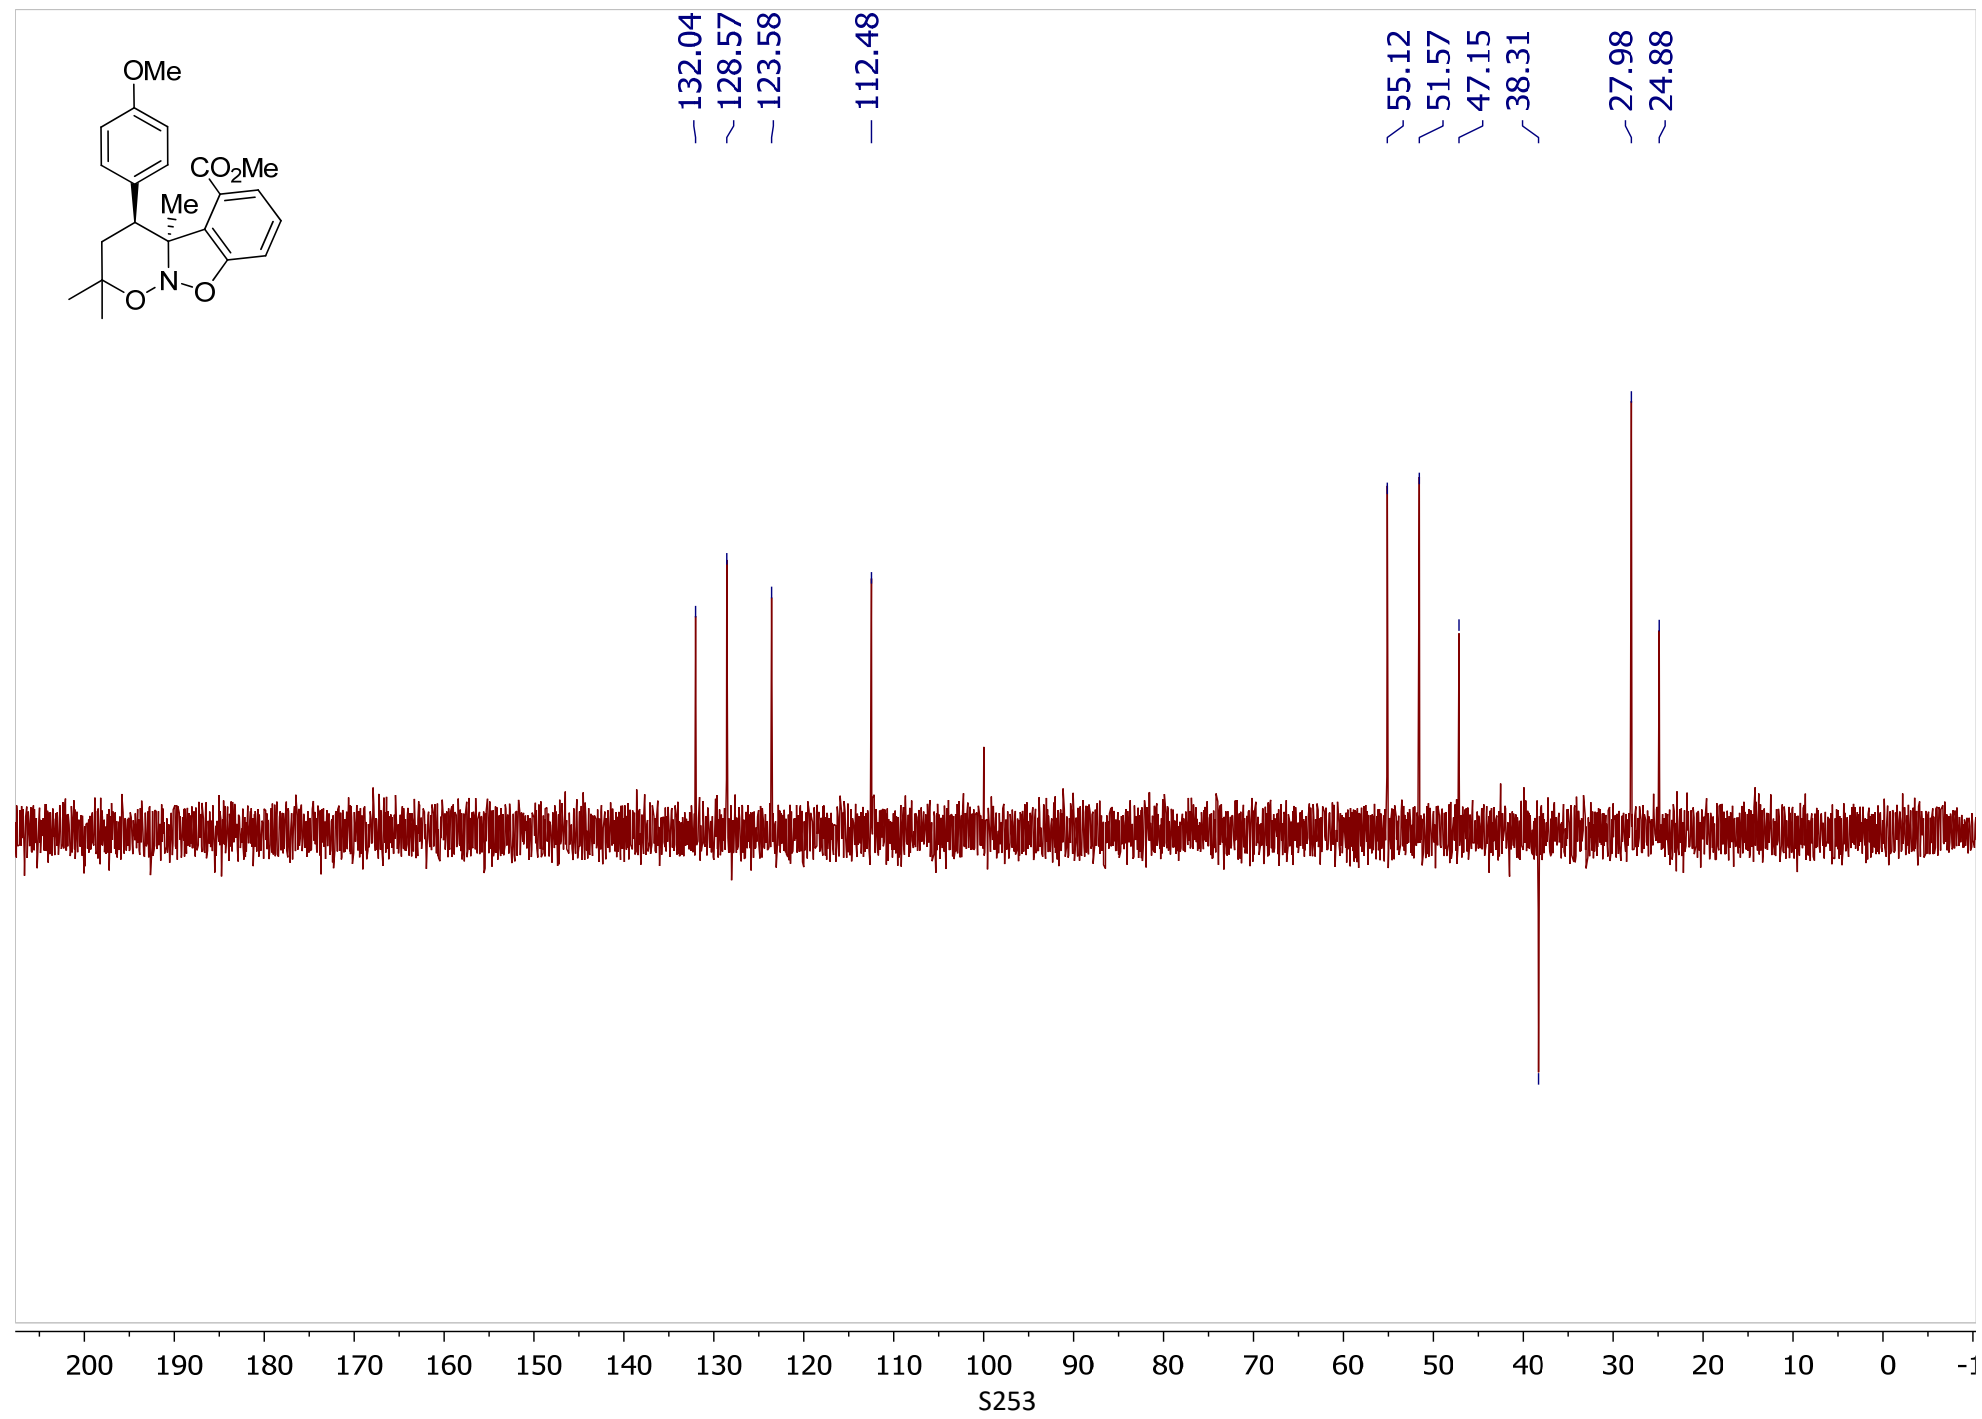

$^1\text{H}$ - $^1\text{H}$  COSY ( $\text{CDCl}_3$ )

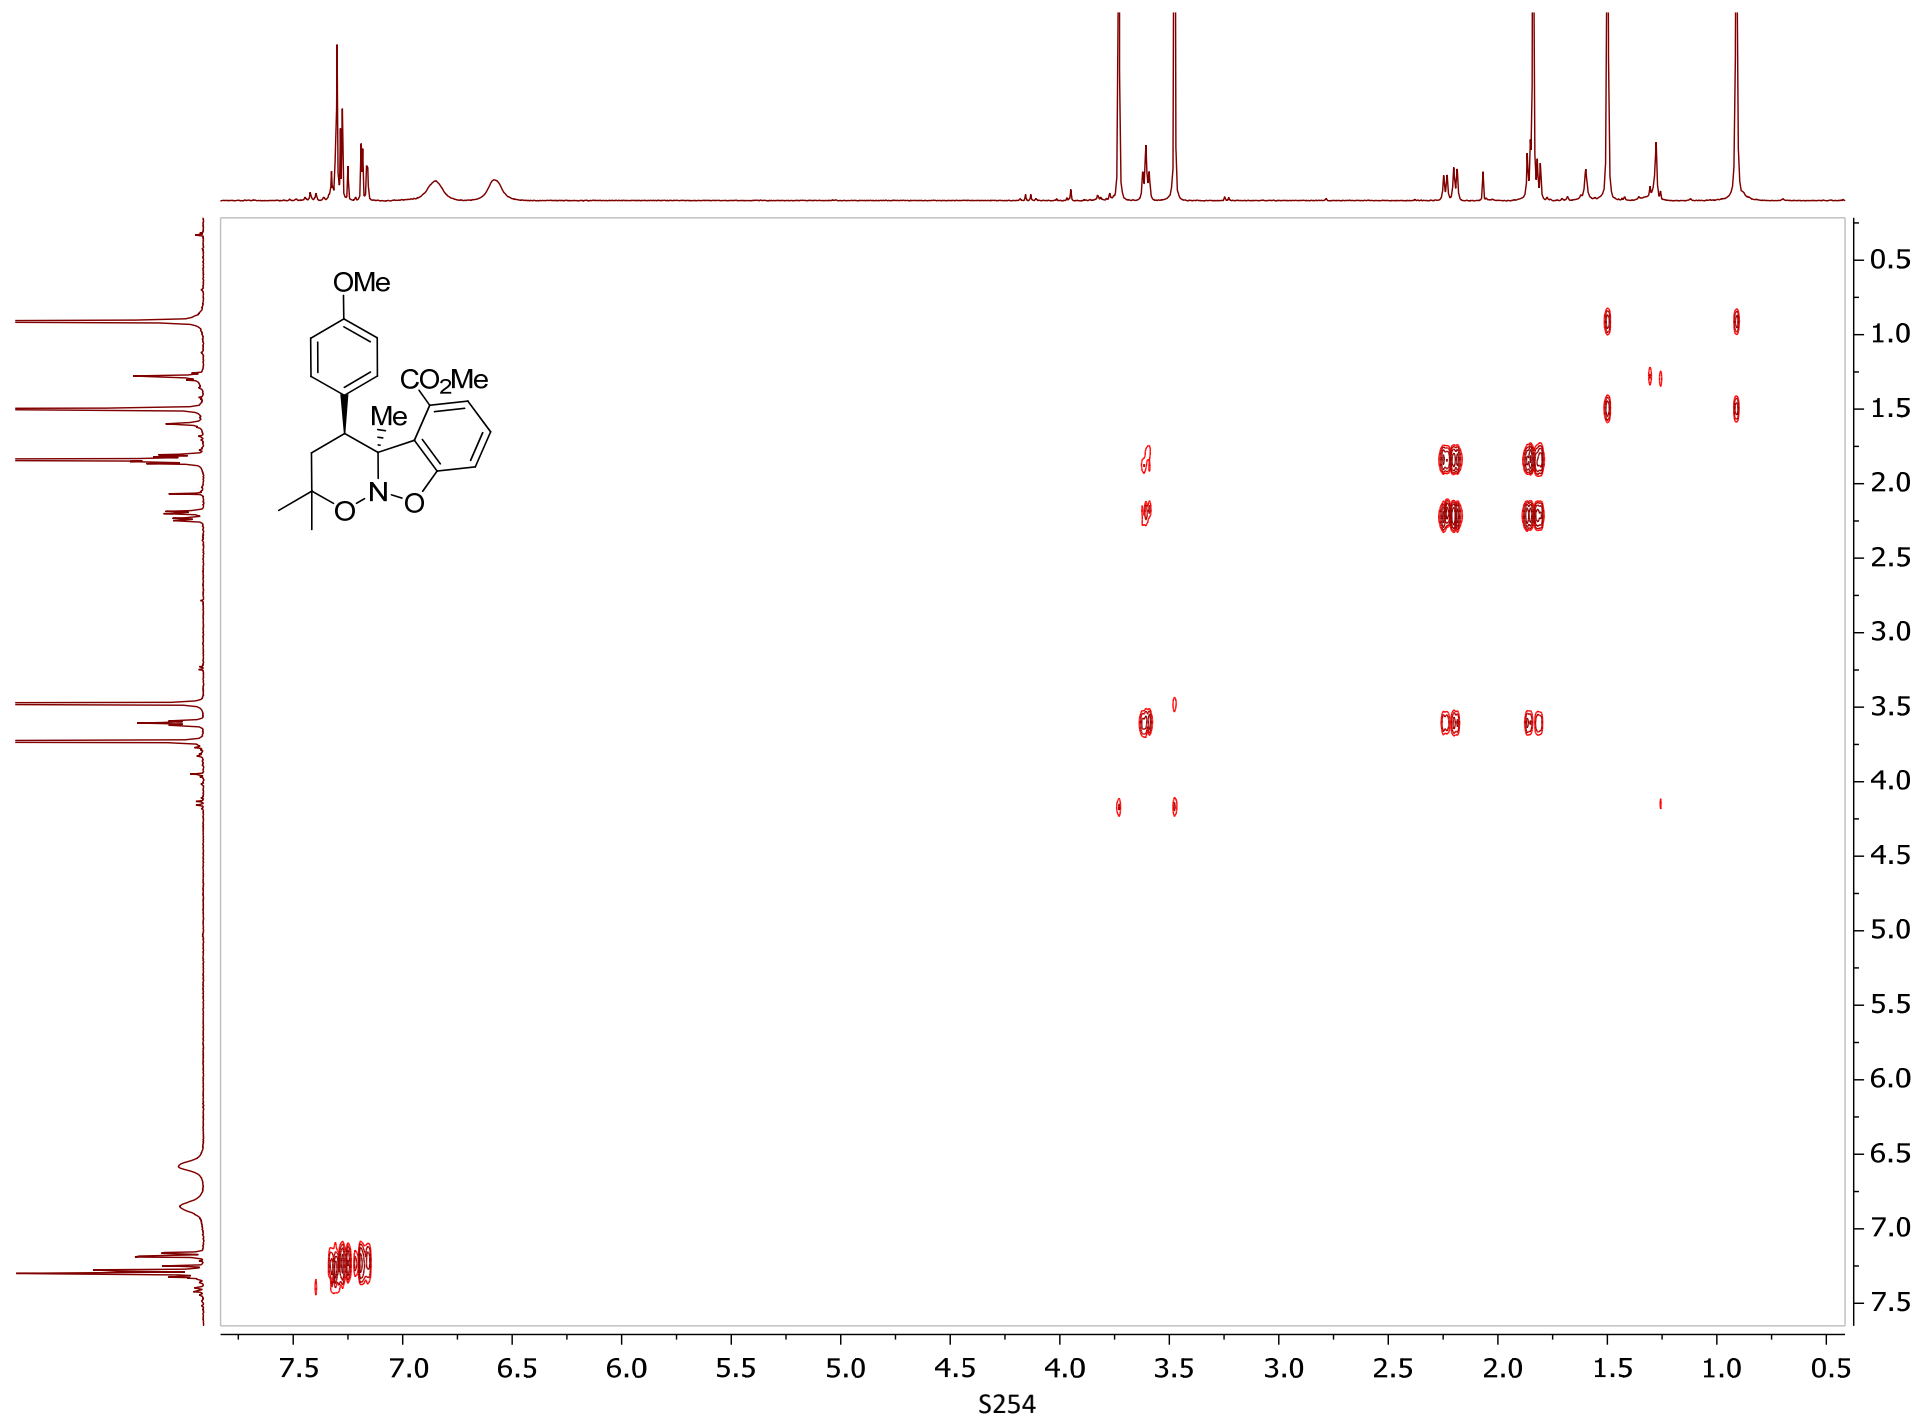

$^1\text{H}$ - $^{13}\text{C}$  HSQC ( $\text{CDCl}_3$ )

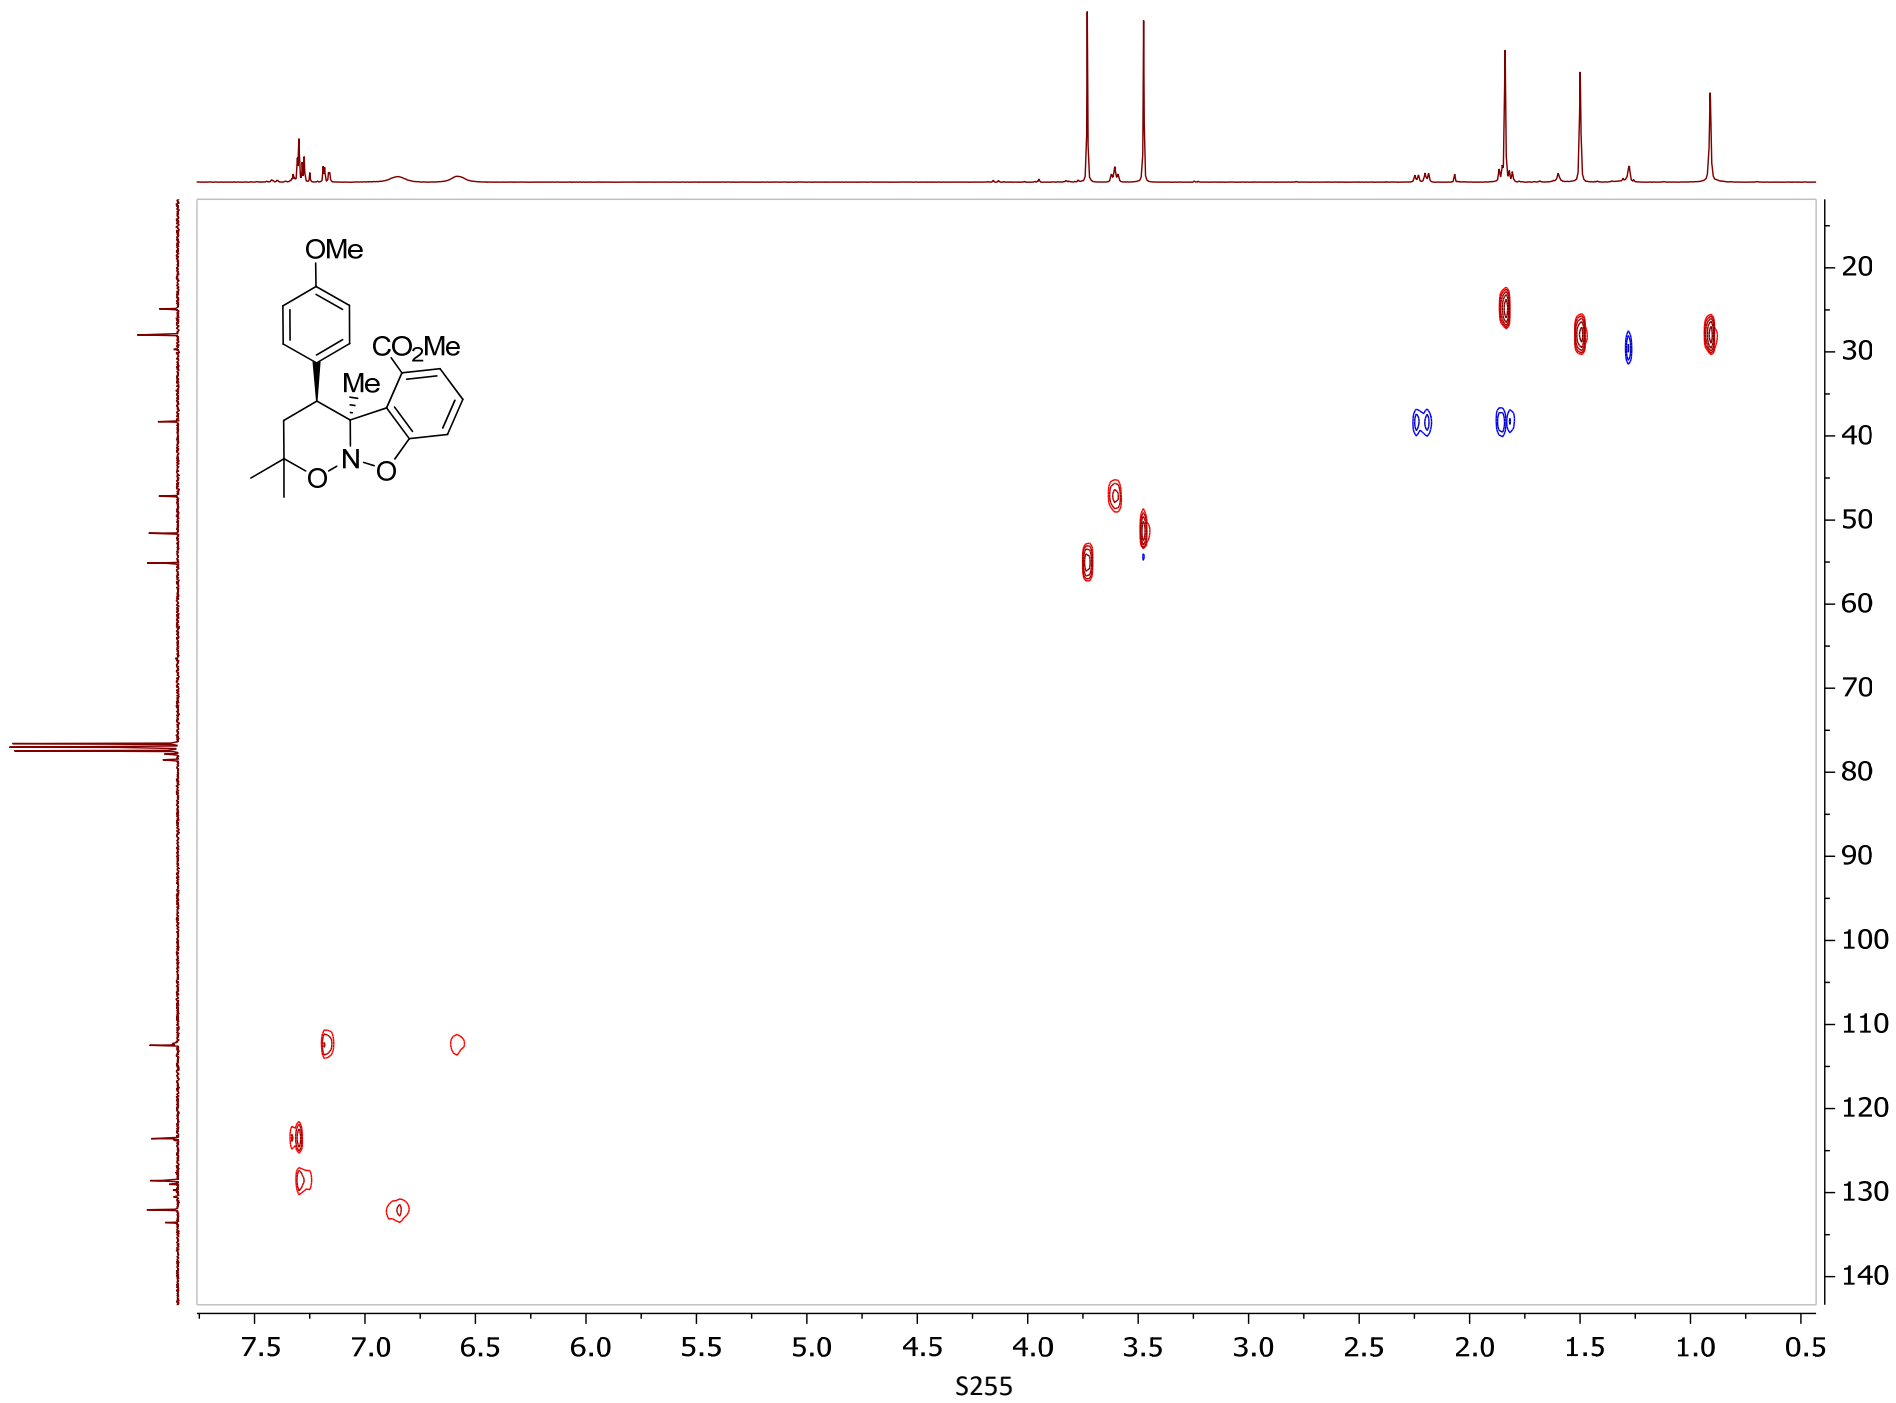

$^1\text{H}$ - $^{13}\text{C}$  HMBC ( $\text{CDCl}_3$ )

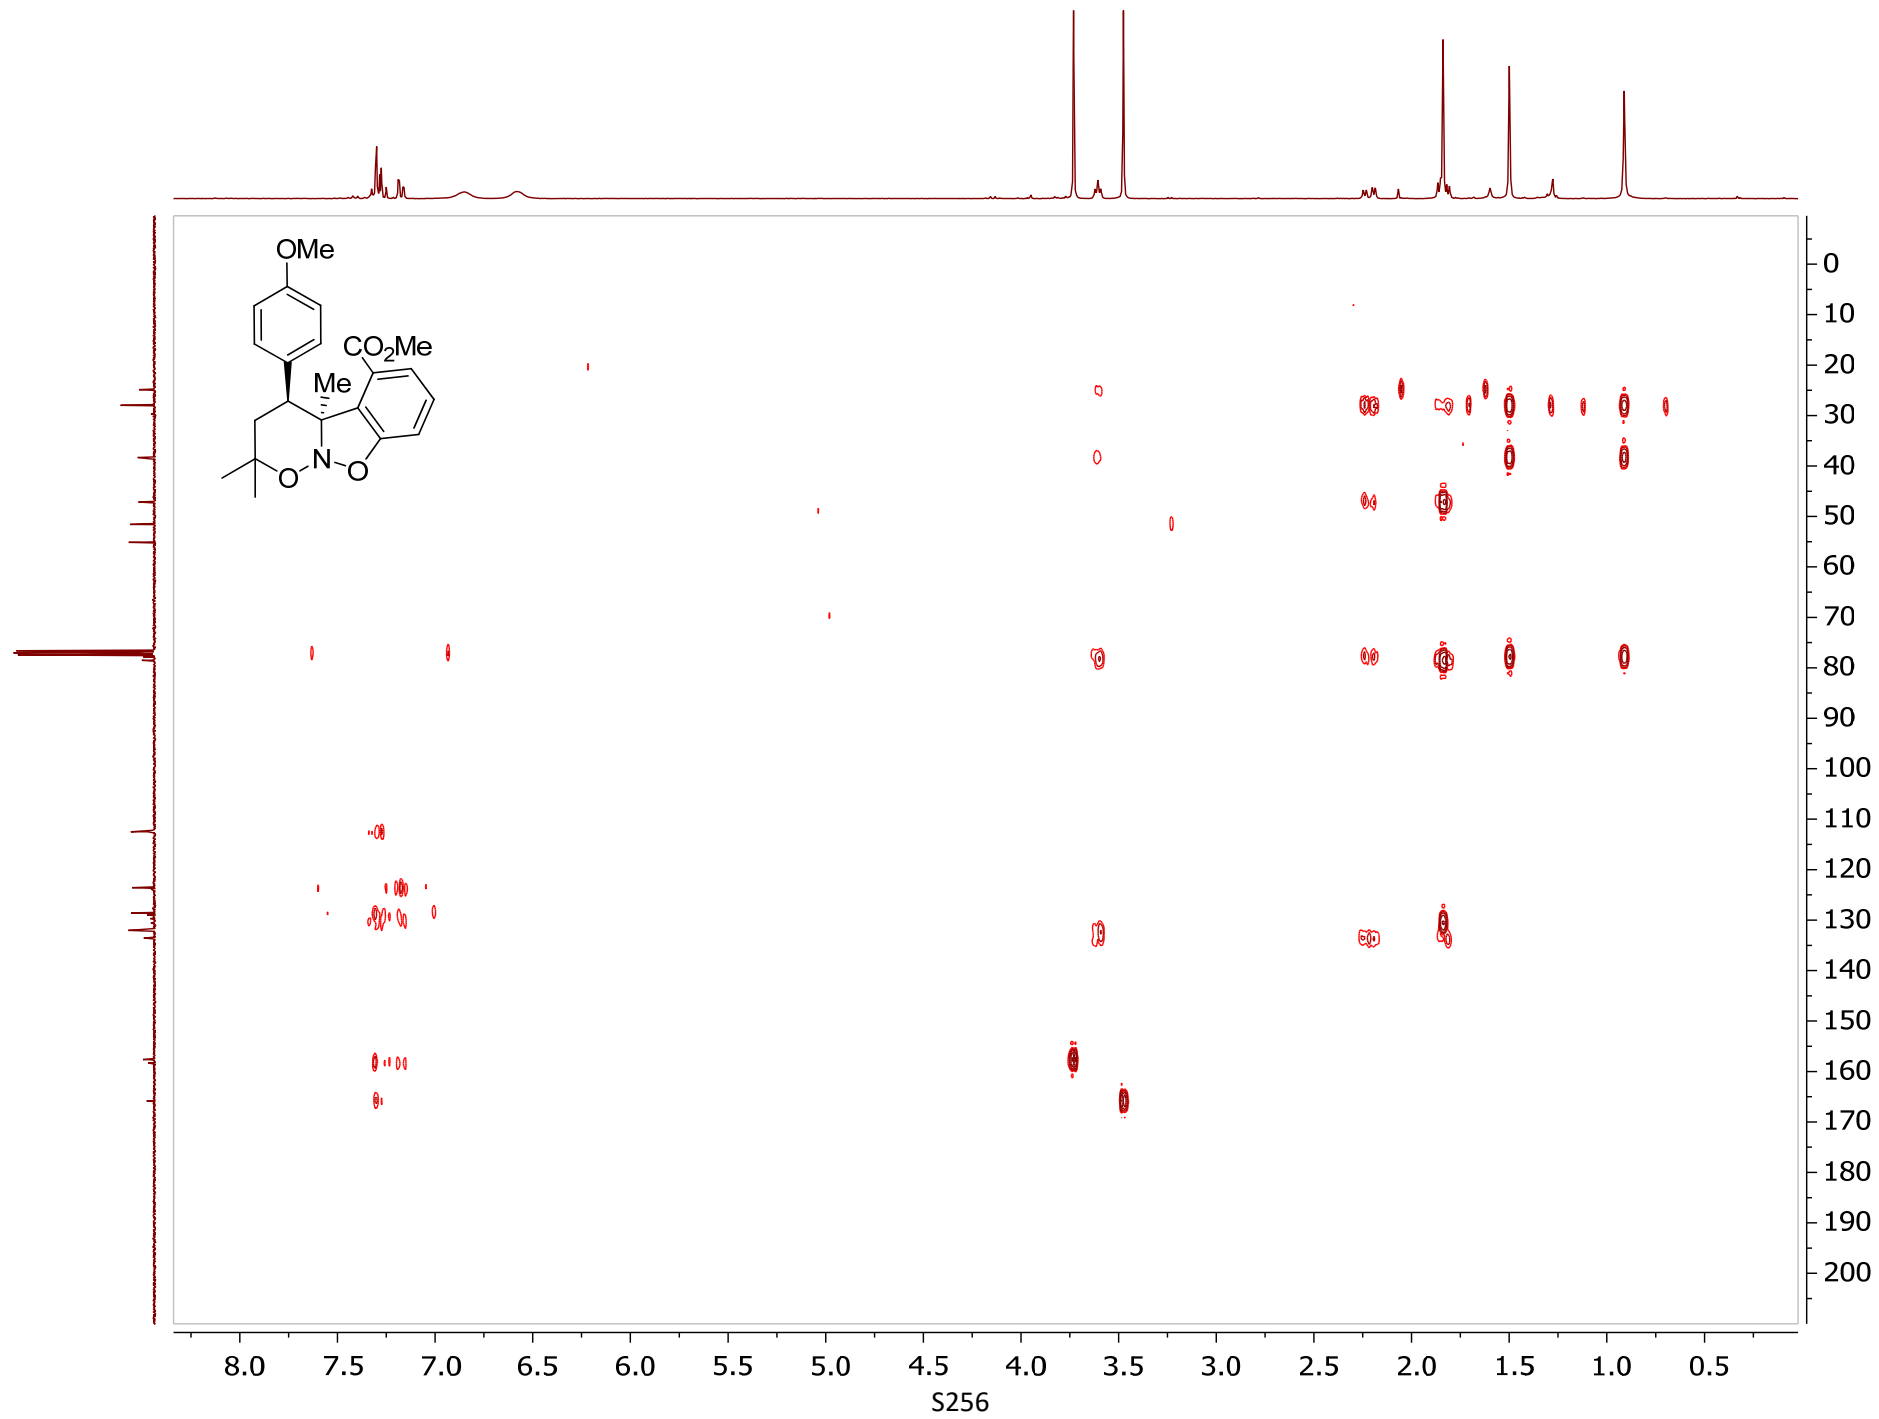



$^1\text{H}$ - $^1\text{H}$  NOESY ( $\text{CDCl}_3$ )

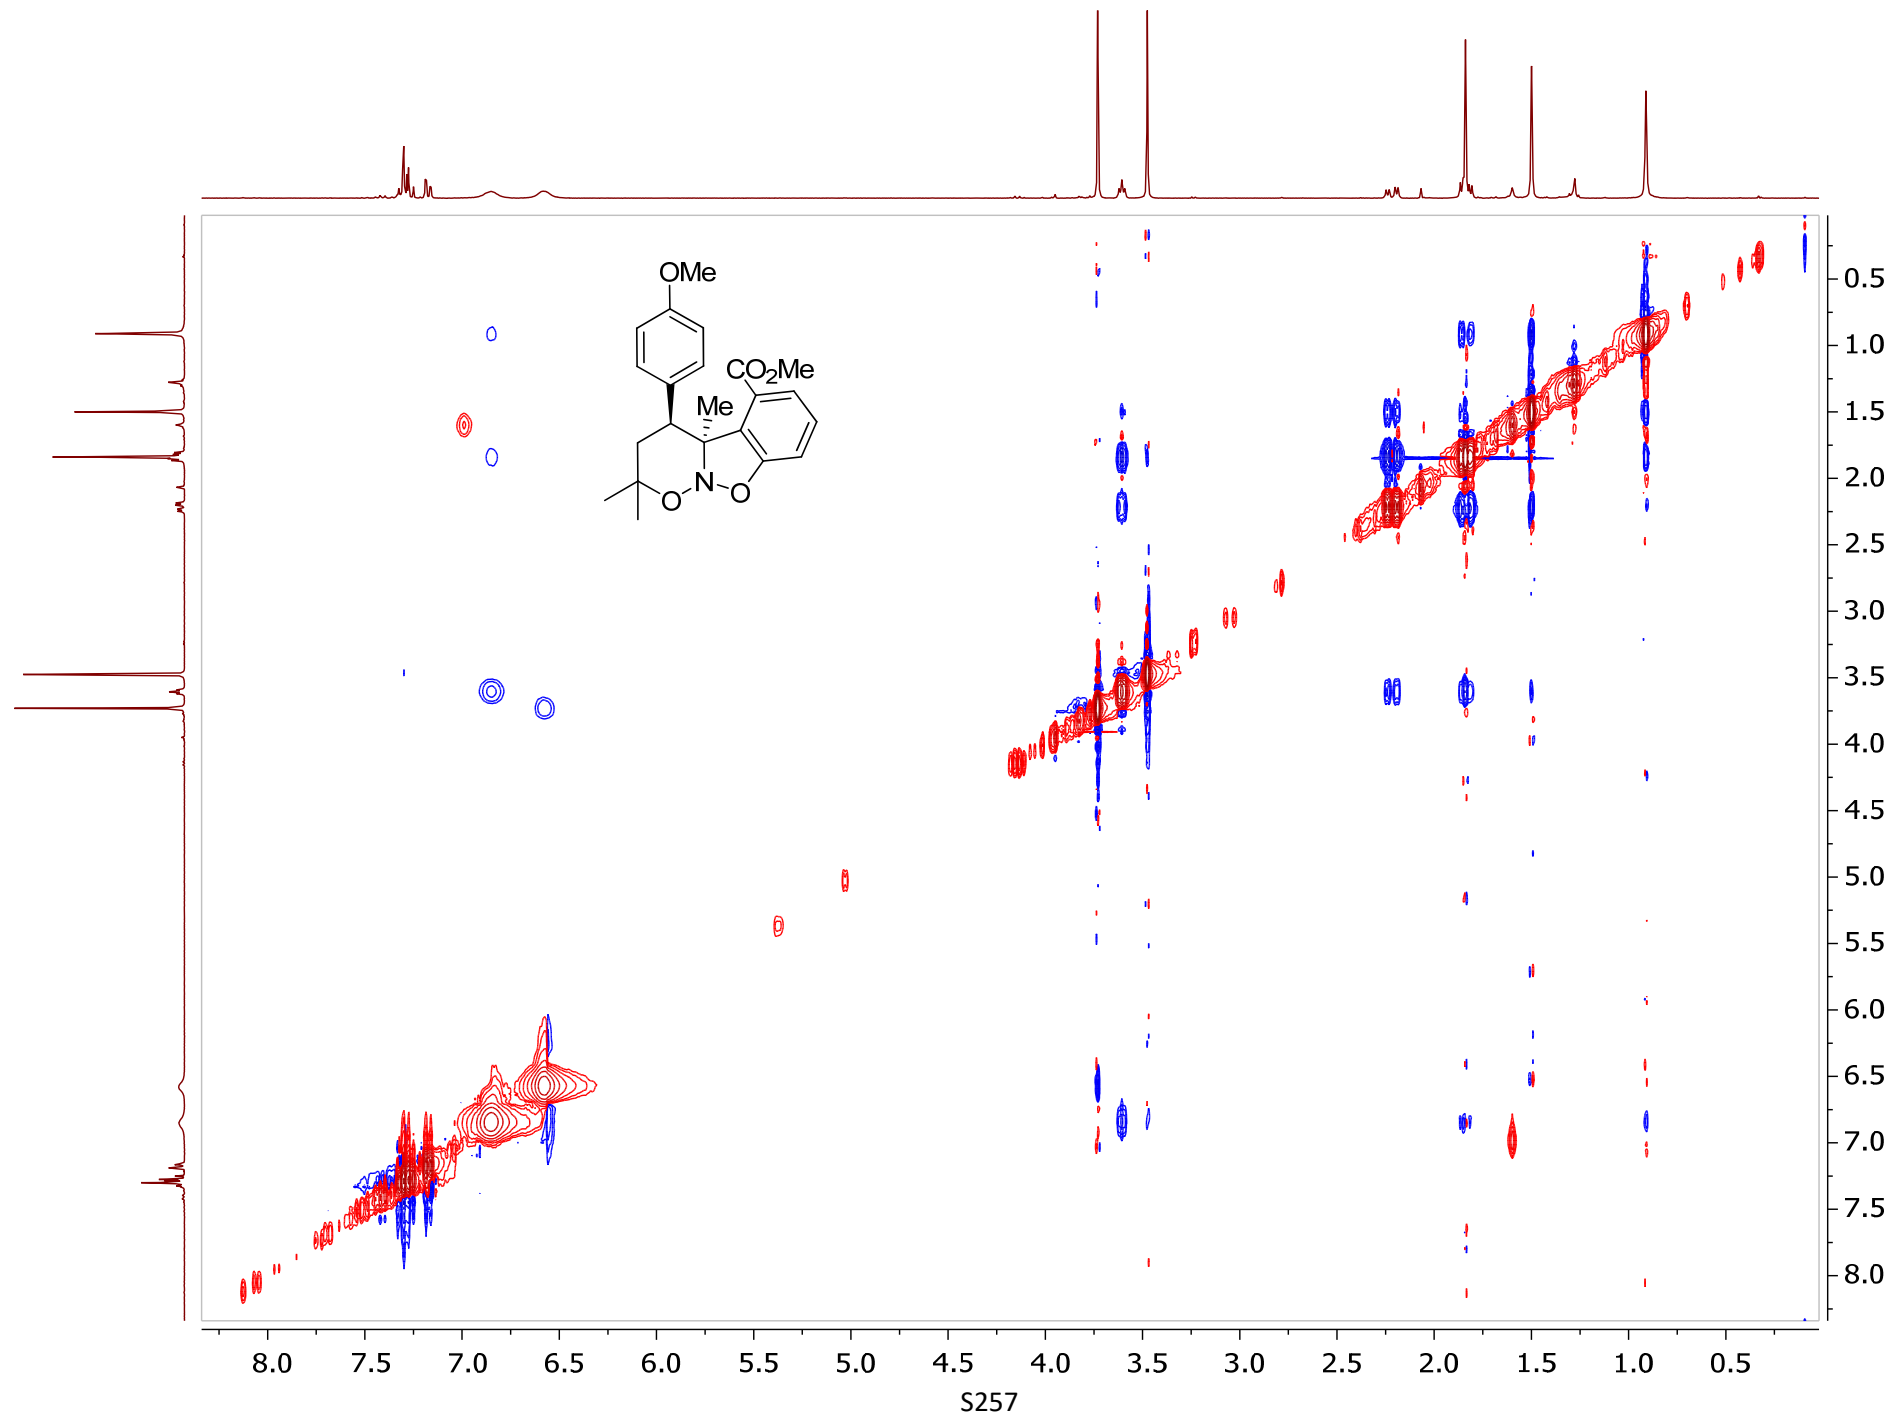

$^1\text{H}$  NMR (300 MHz, benzene- $\text{d}_6$ )

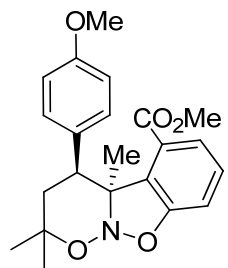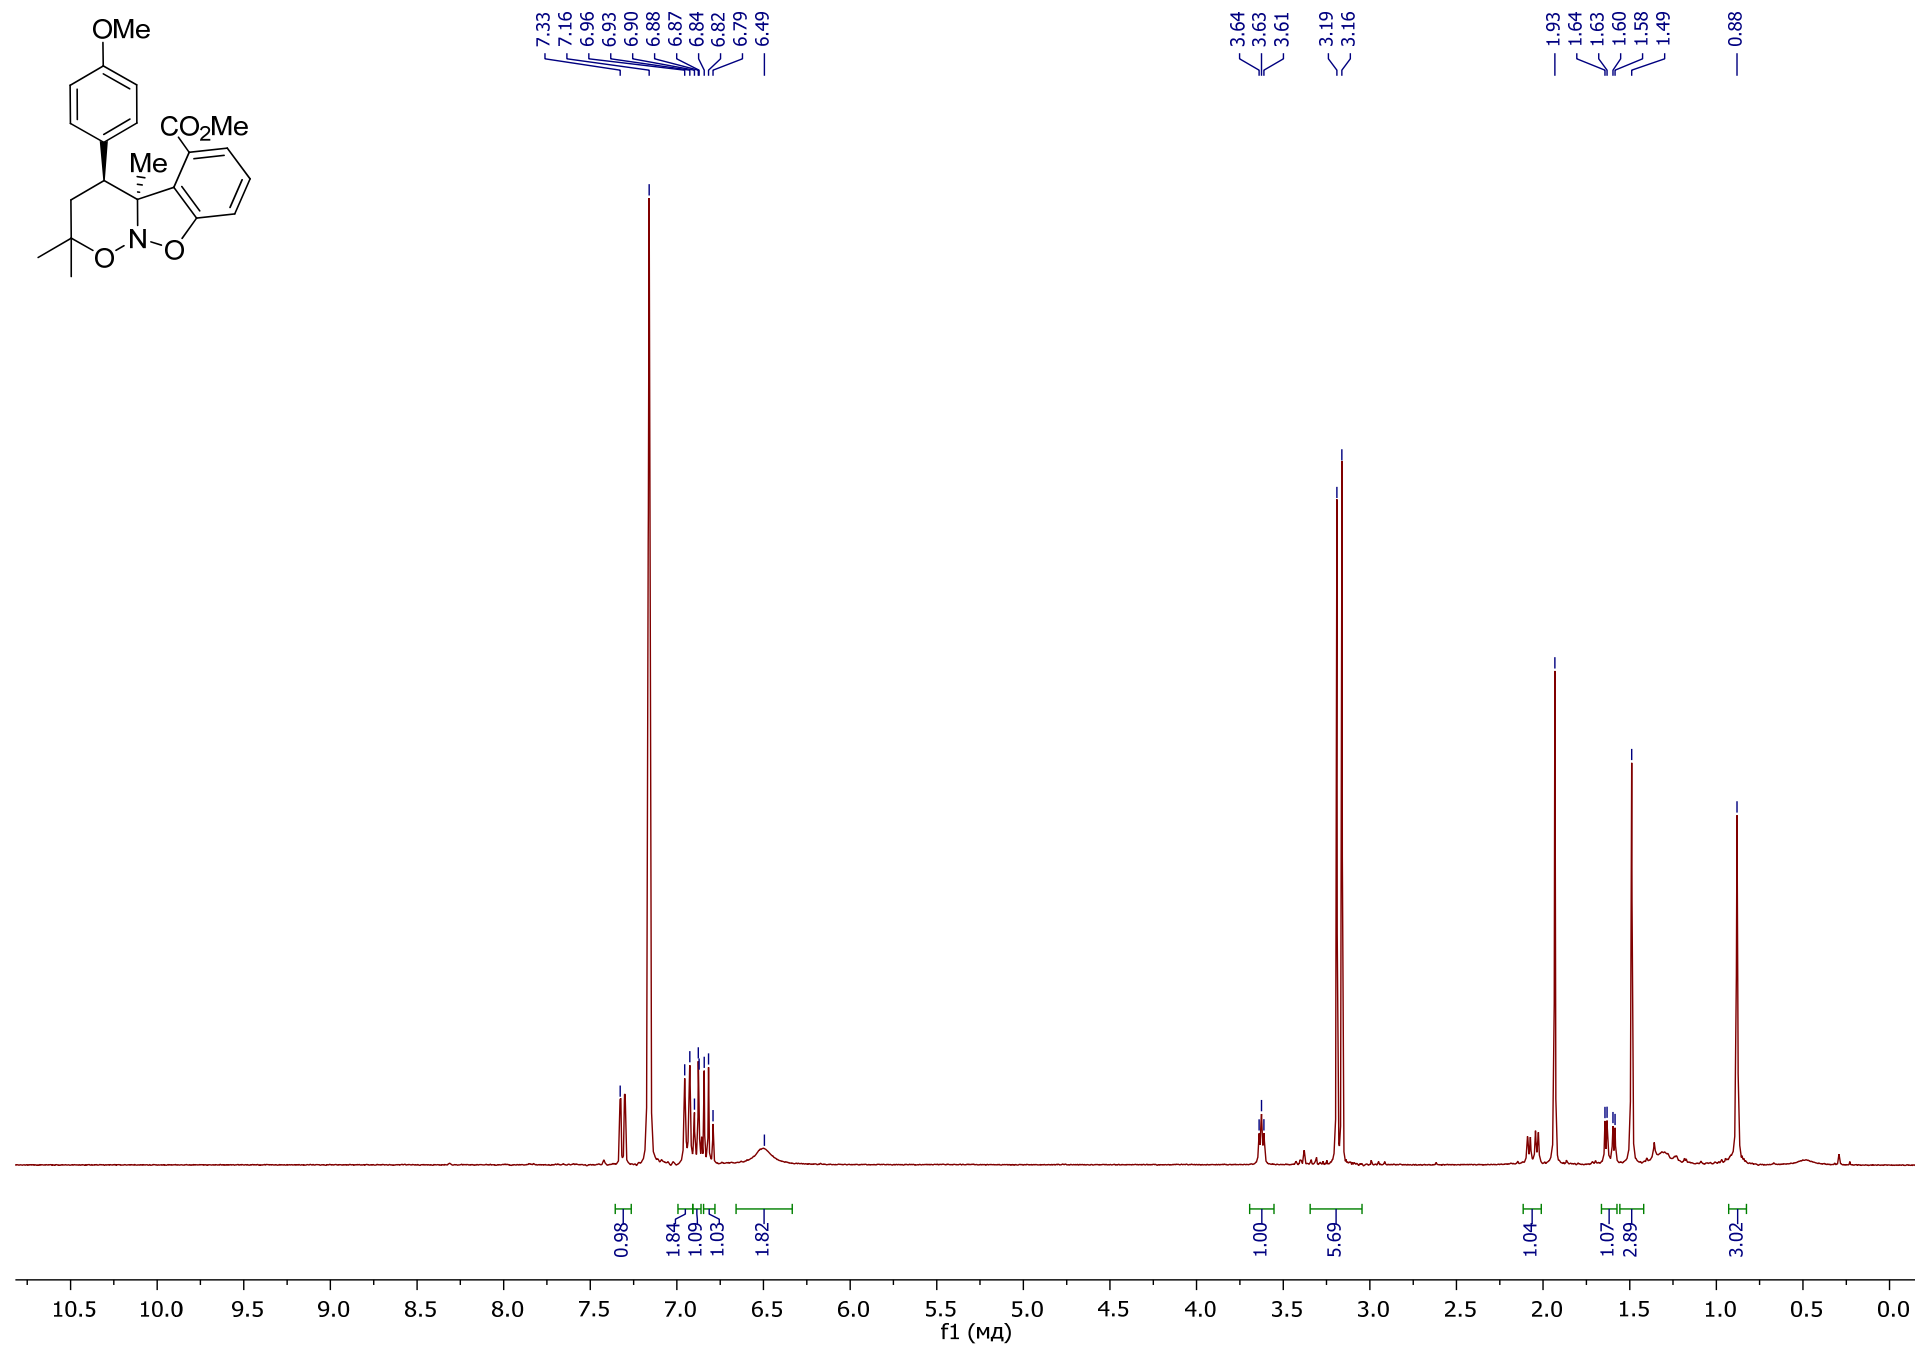

$^{13}\text{C}$  NMR (75 MHz, benzene- $d_6$ )

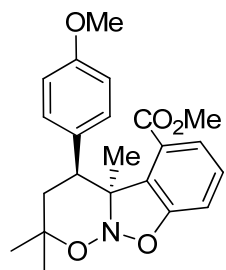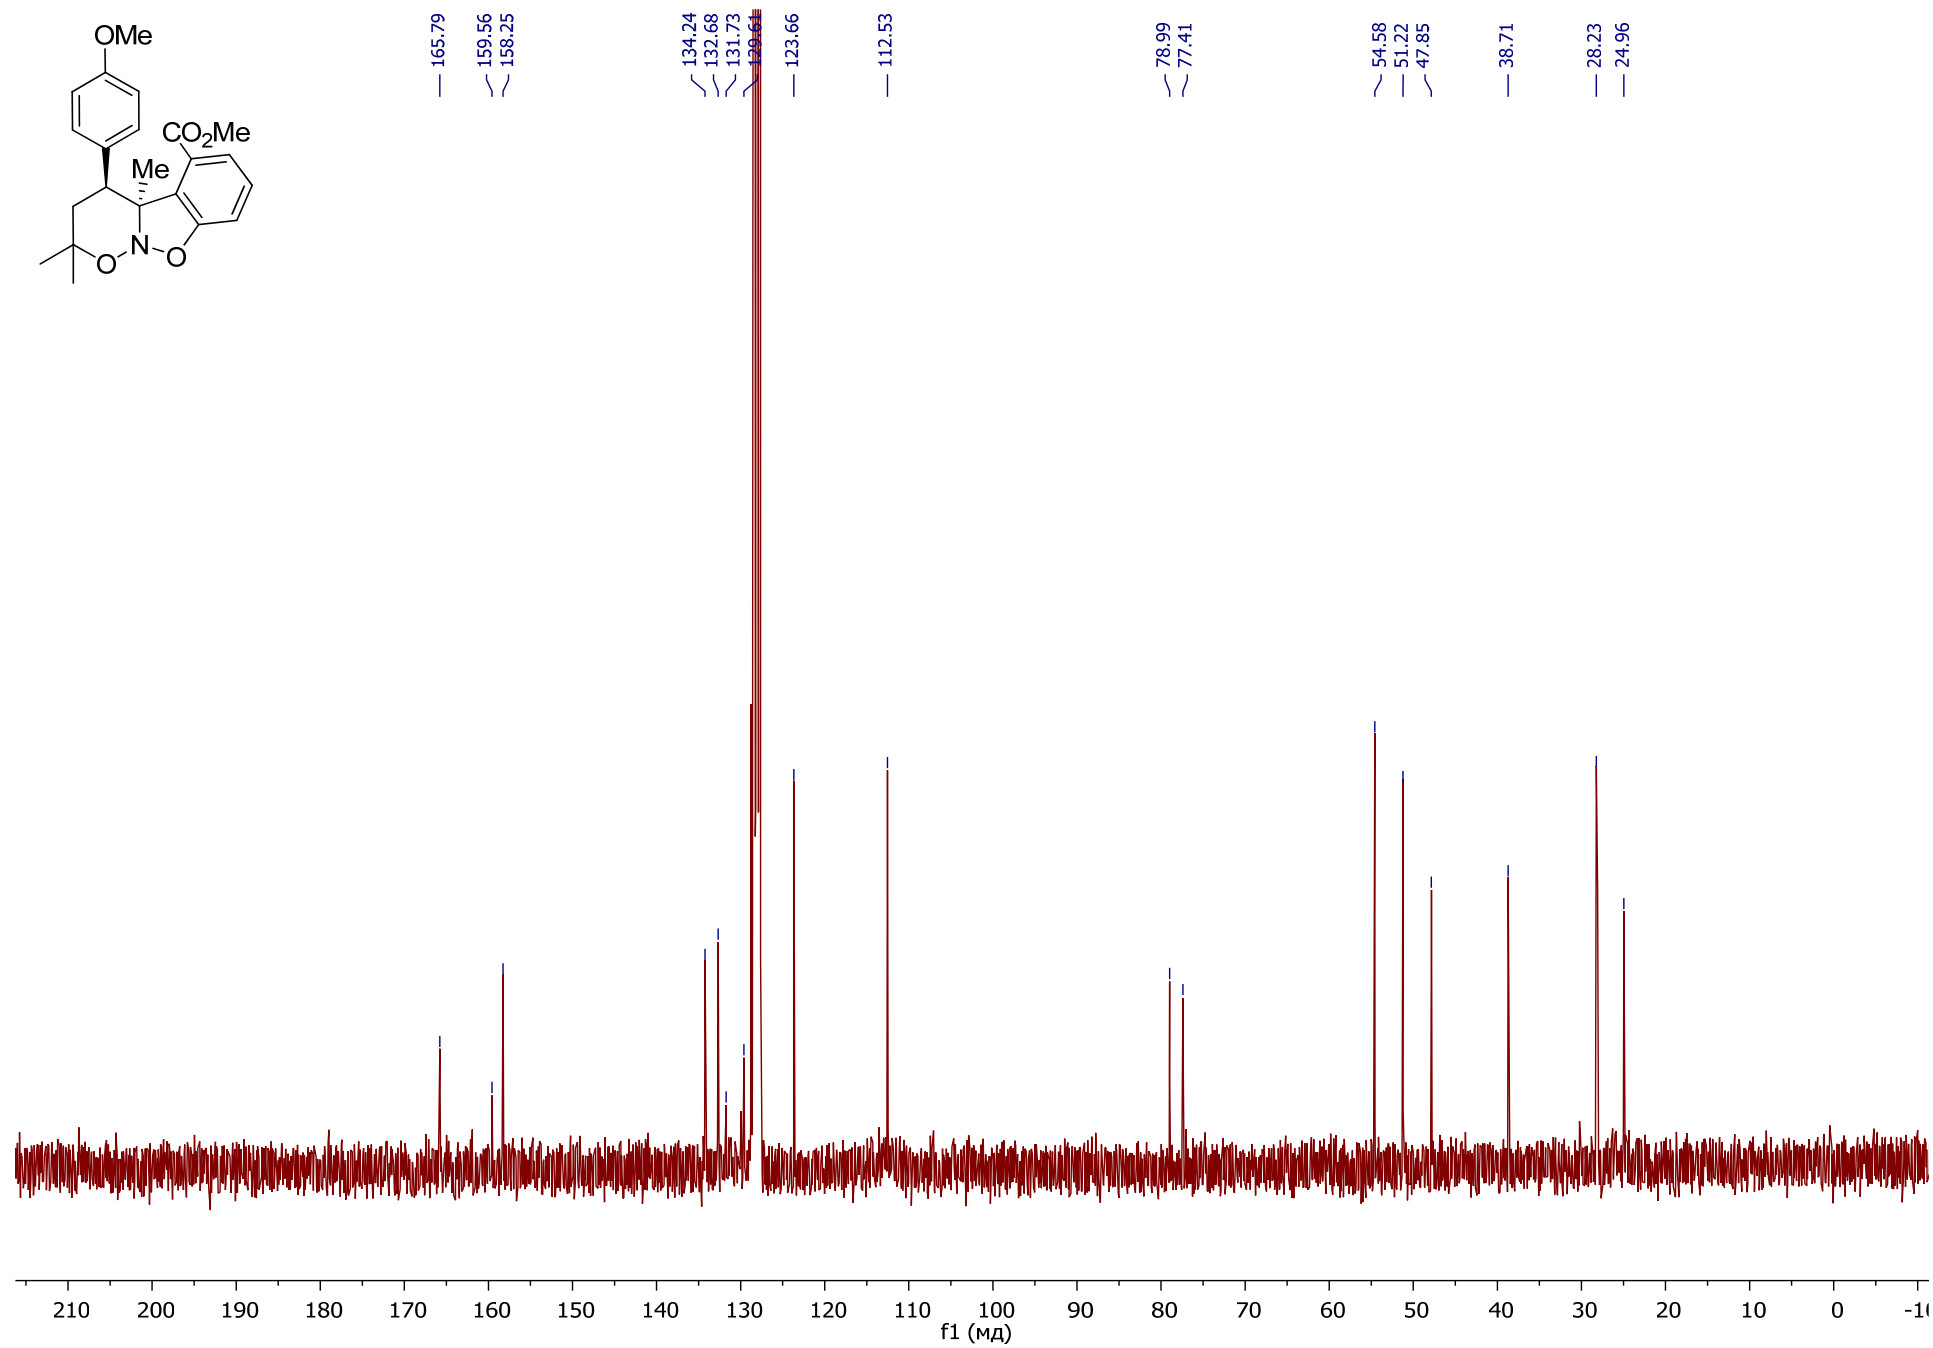

$^1\text{H}$ - $^1\text{H}$  COSY (benzene- $\text{d}_6$ )

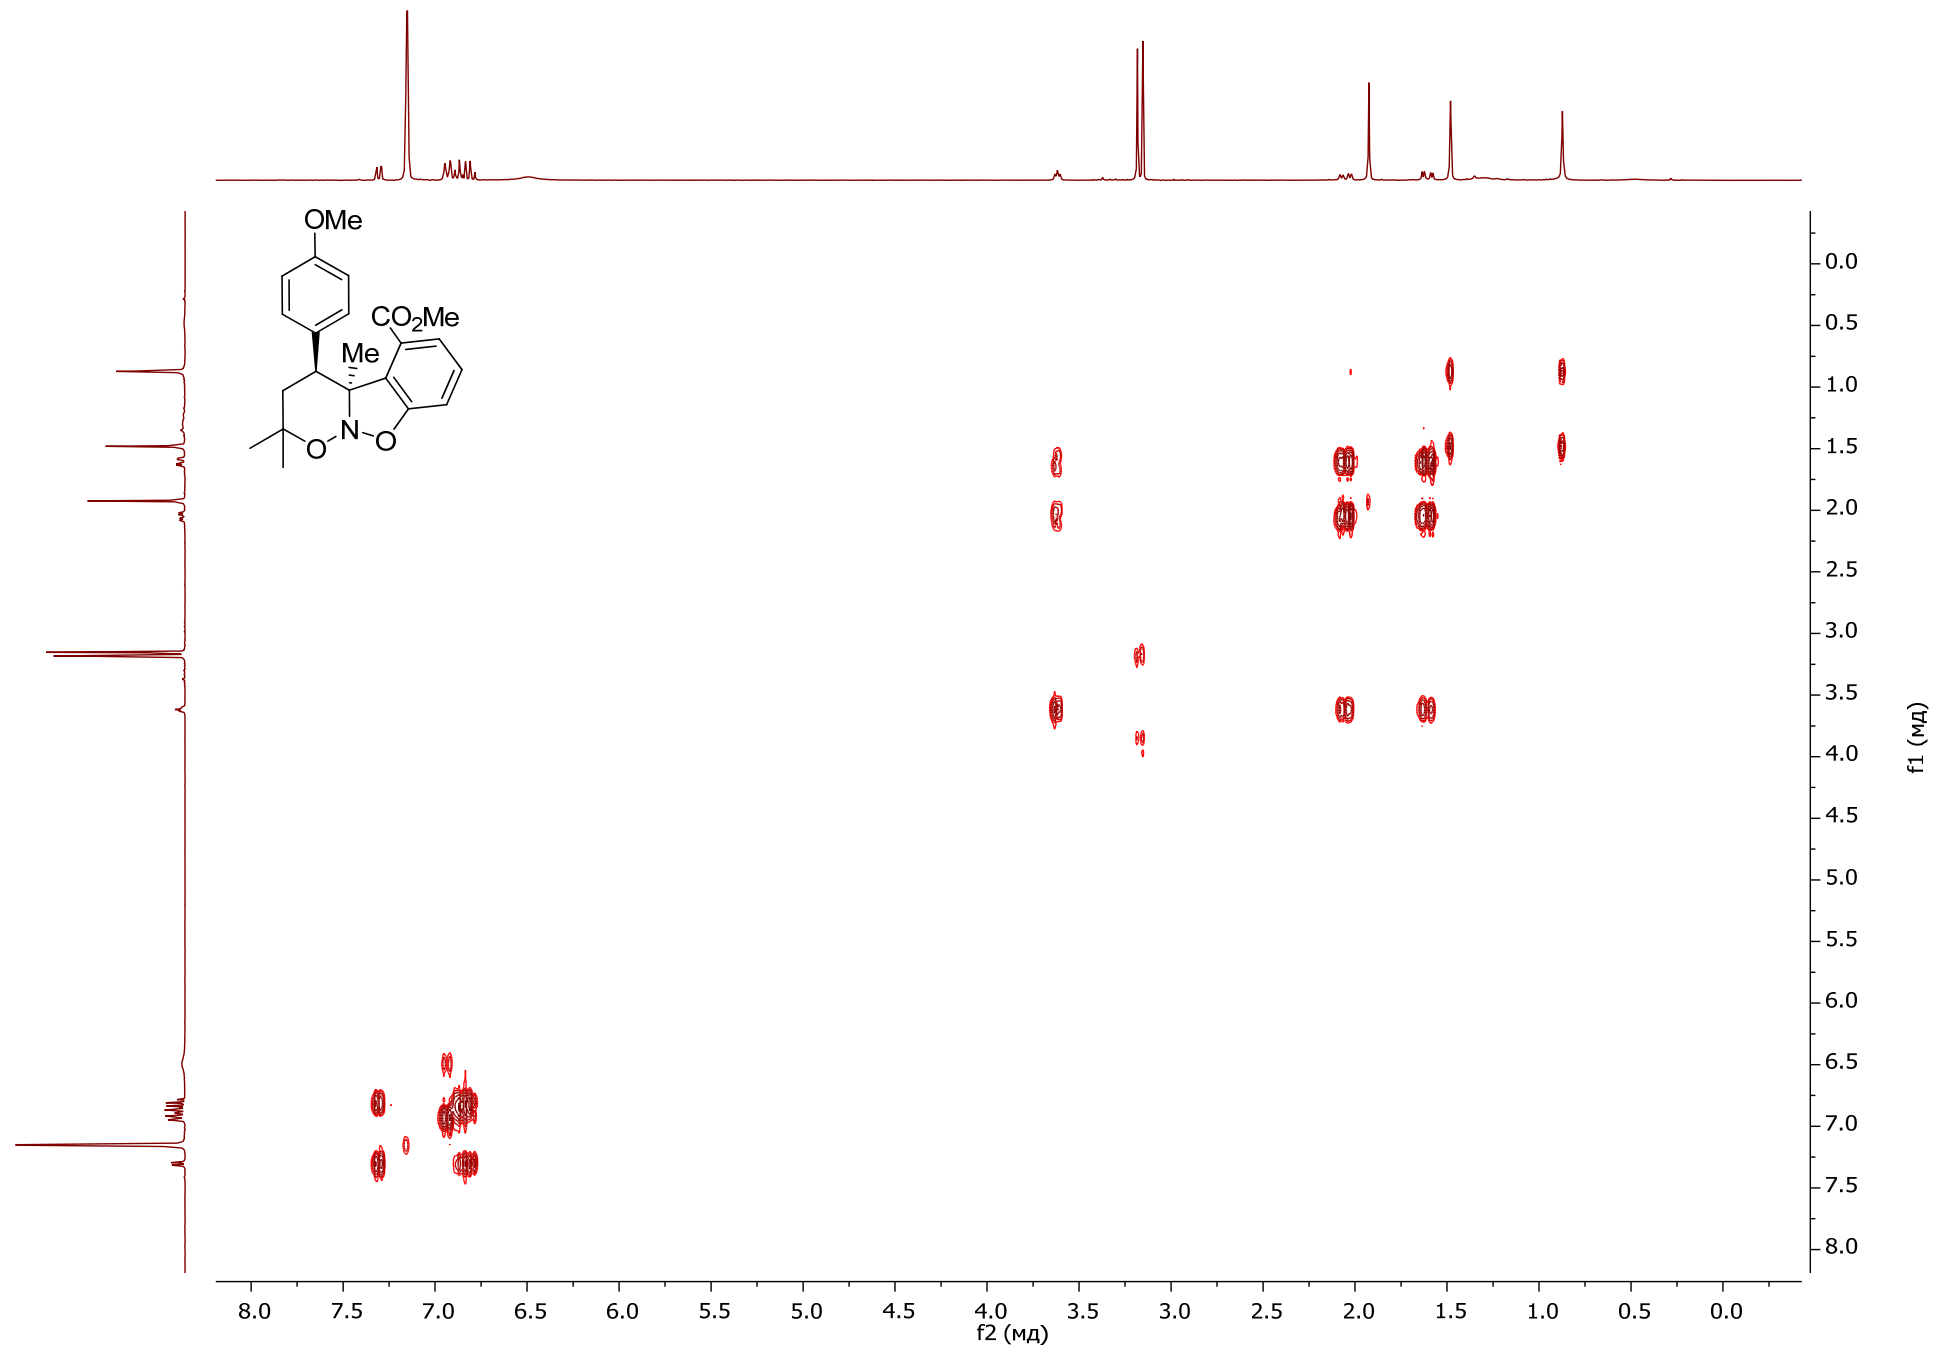

$^1\text{H}$ - $^{13}\text{C}$  HSQC (benzene- $\text{d}_6$ )

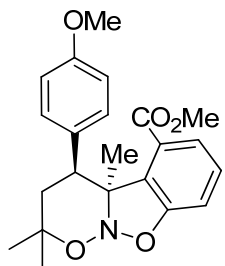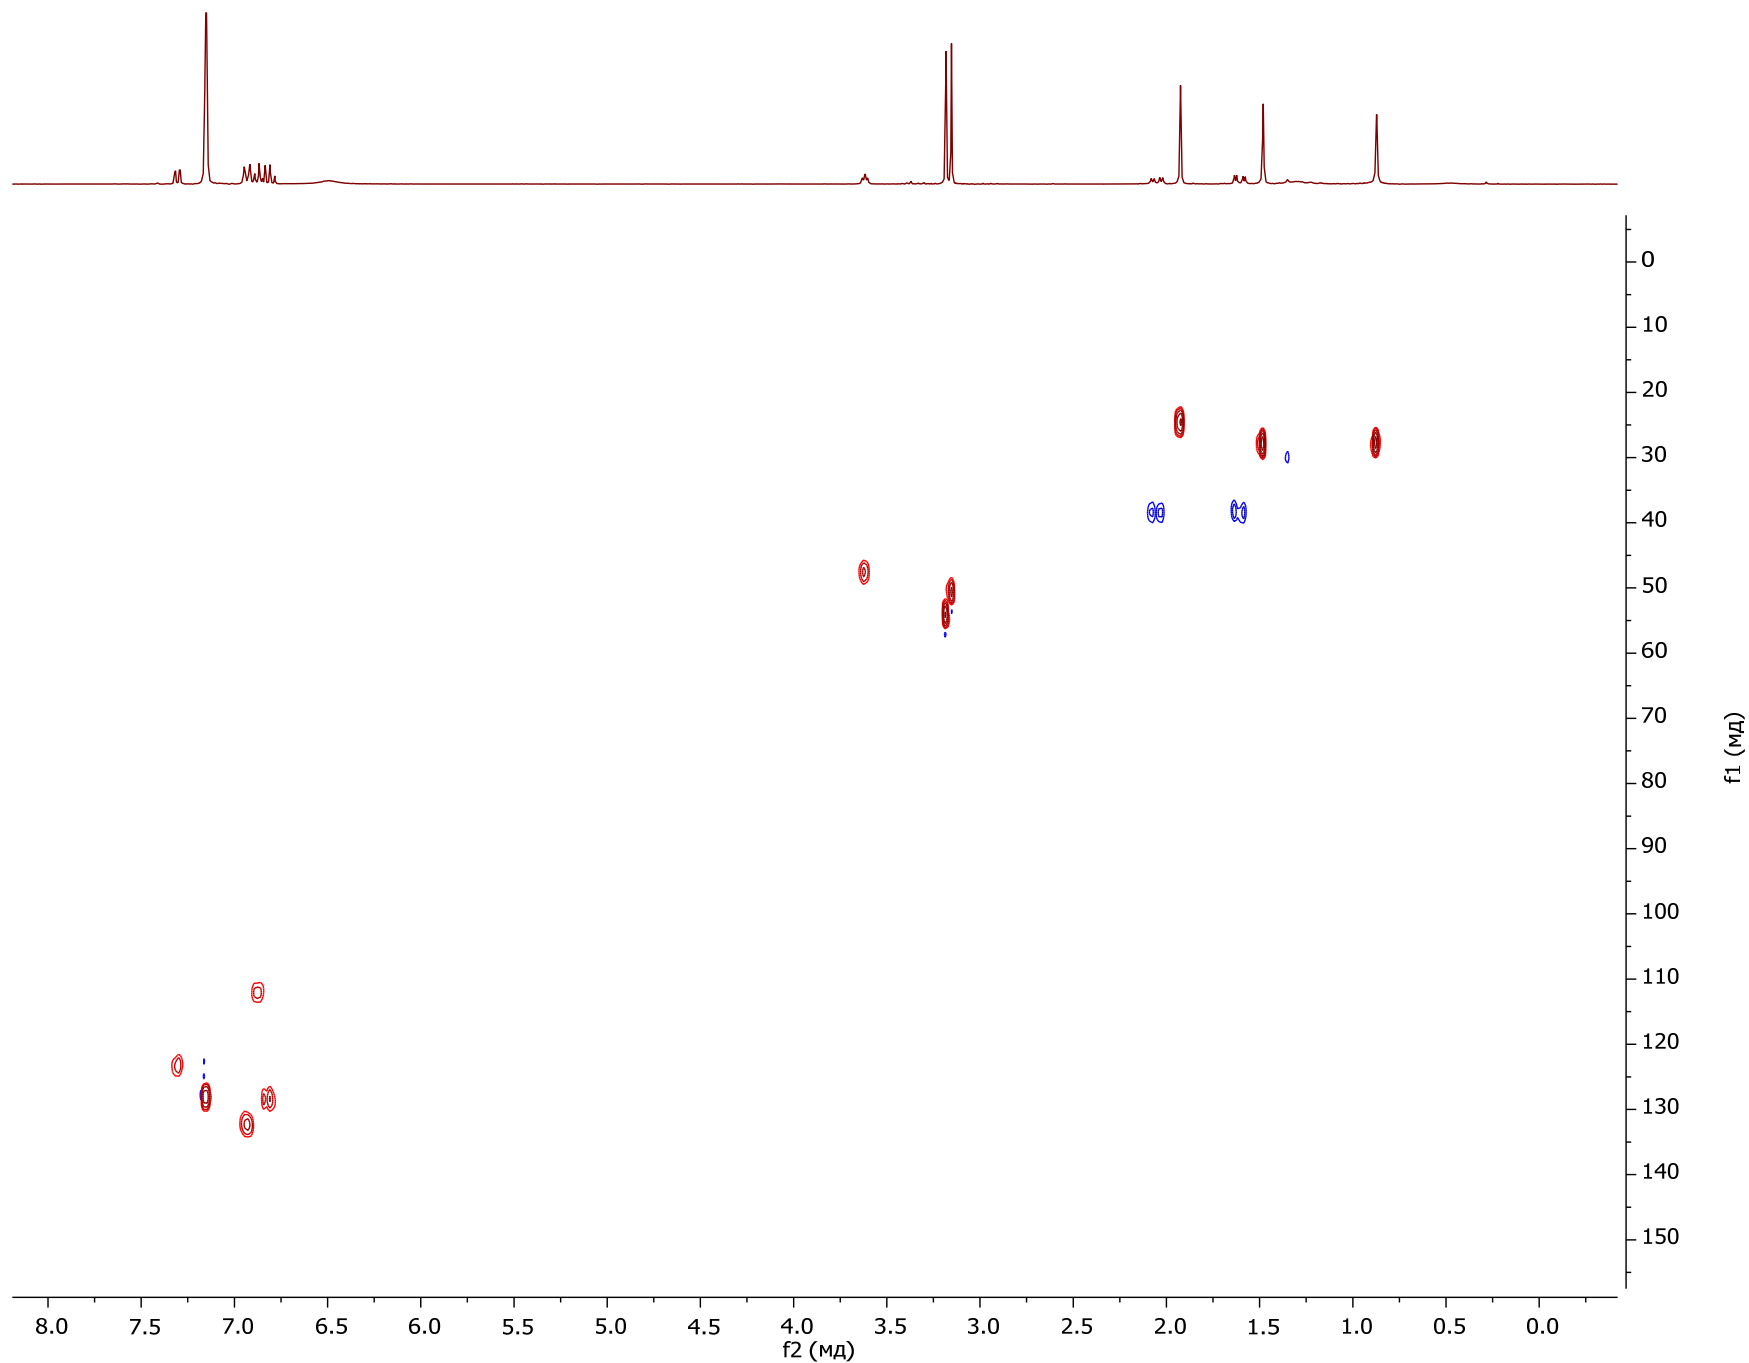

$^1\text{H}$ - $^{13}\text{C}$  HMBC (benzene- $\text{d}_6$ )

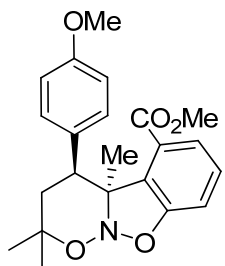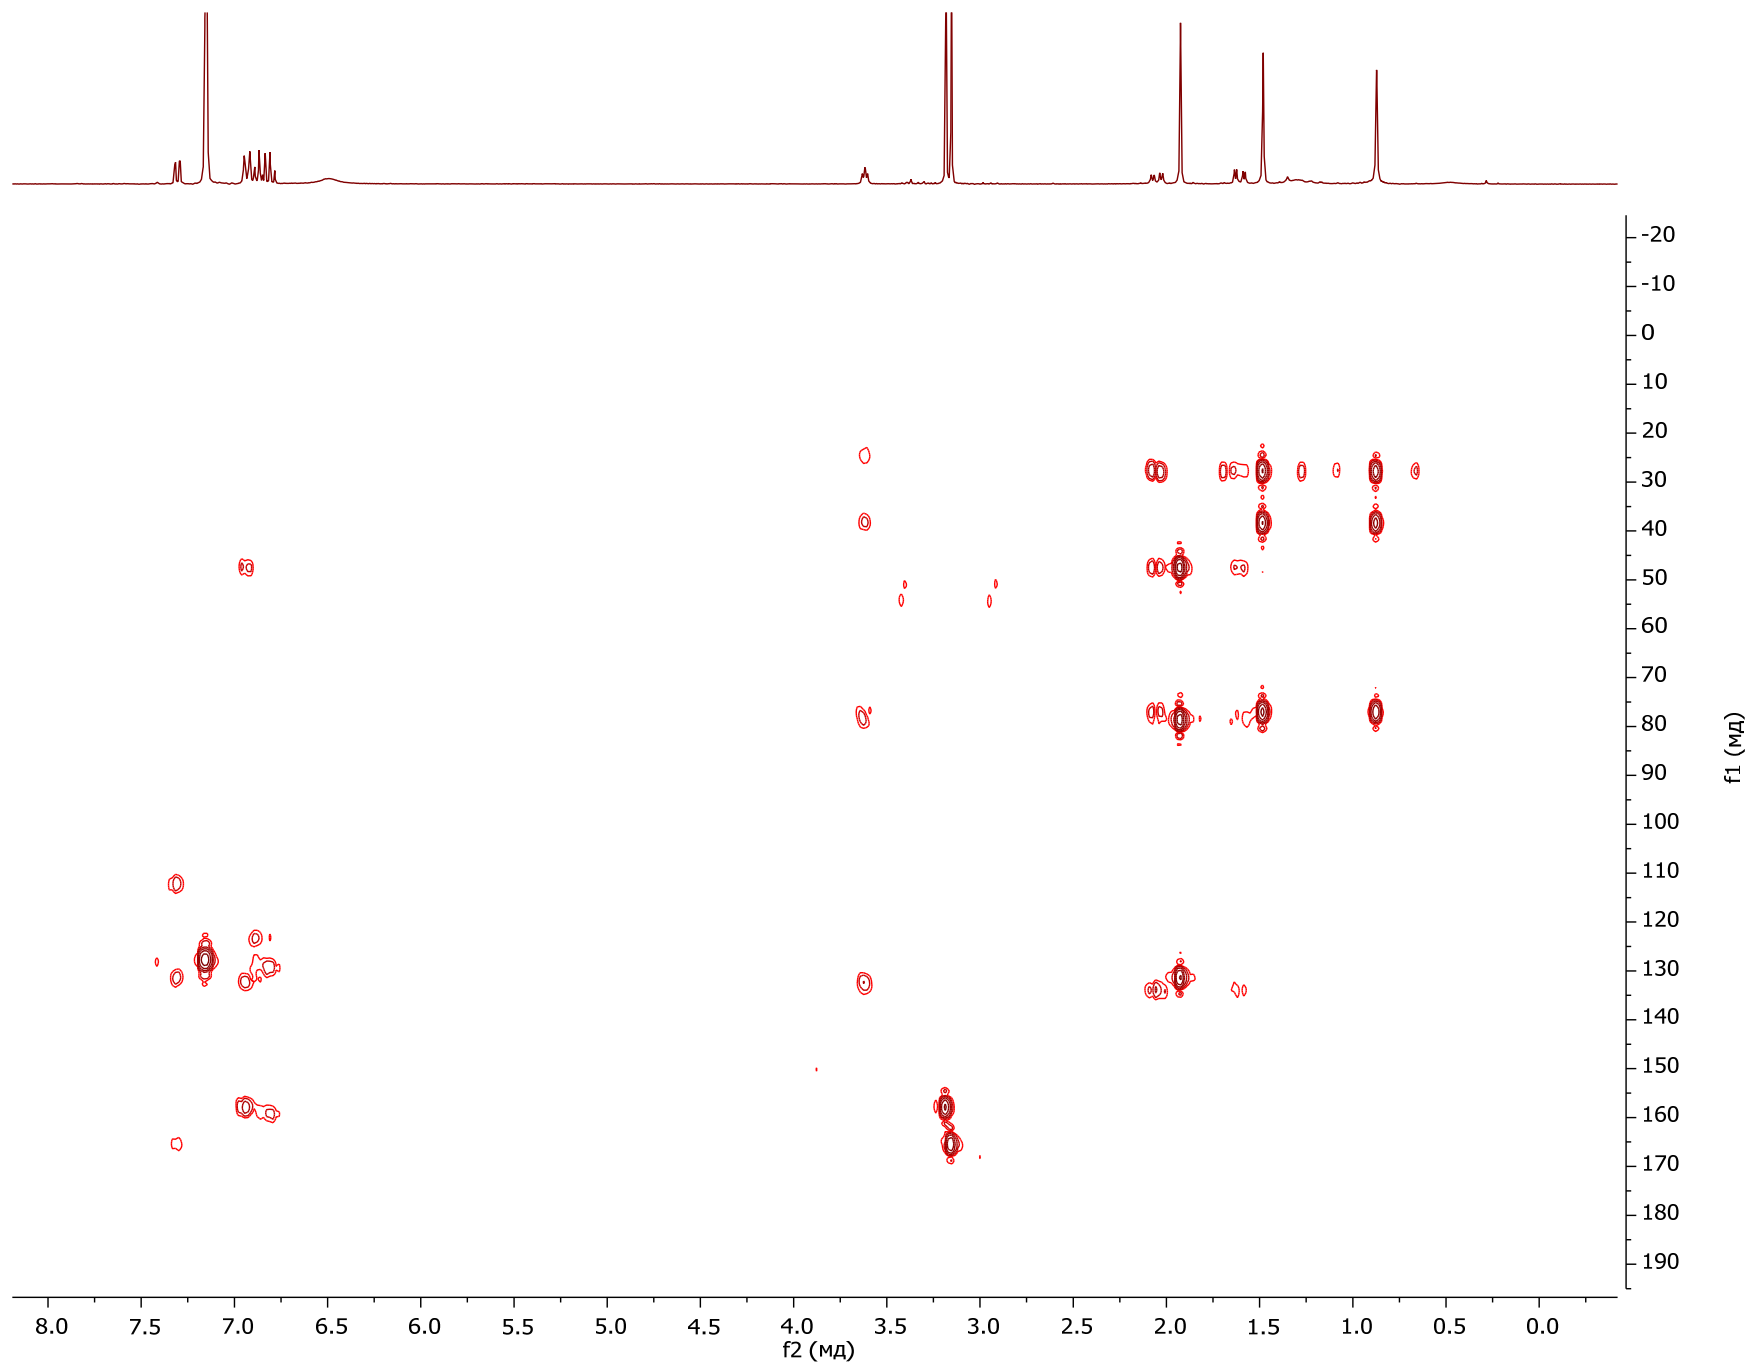

$^1\text{H}$ - $^1\text{H}$  NOESY (benzene- $\text{d}_6$ )

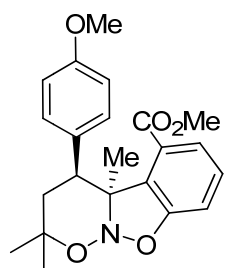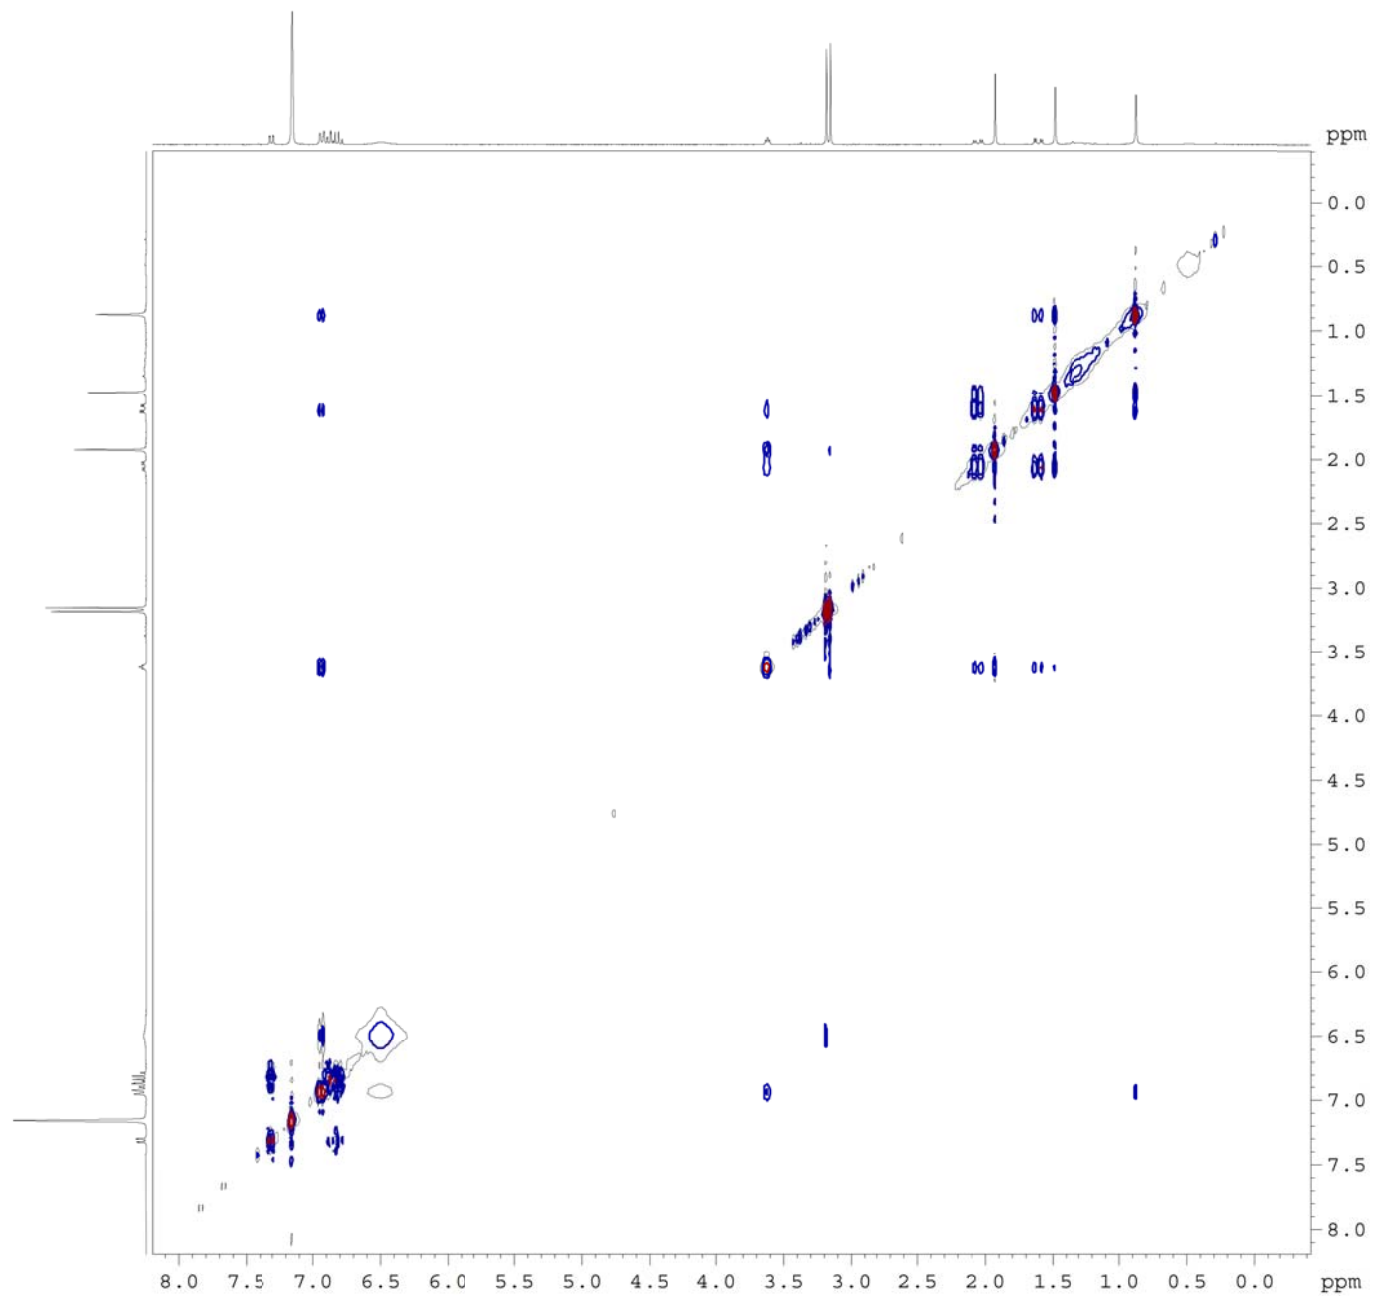

5-Methoxy-4-(4-methoxyphenyl)-2,2,4a-trimethyl-2,3,4,4a-tetrahydrobenzo[4,5]isoxazolo[2,3-b][1,2]oxazine (*trans*-5ag and *cis*-5ag)

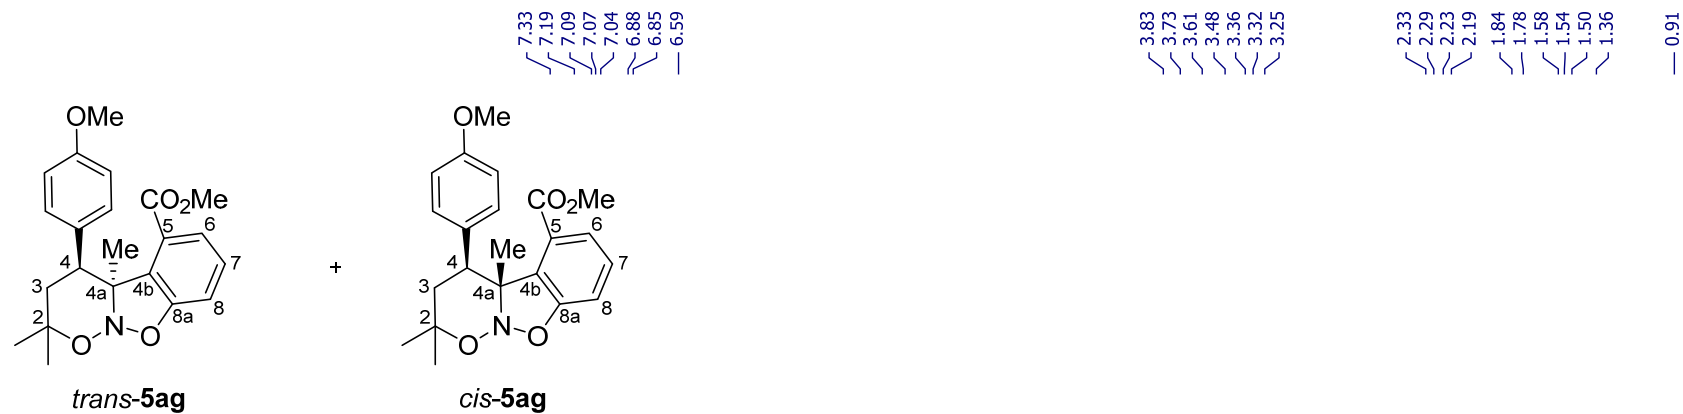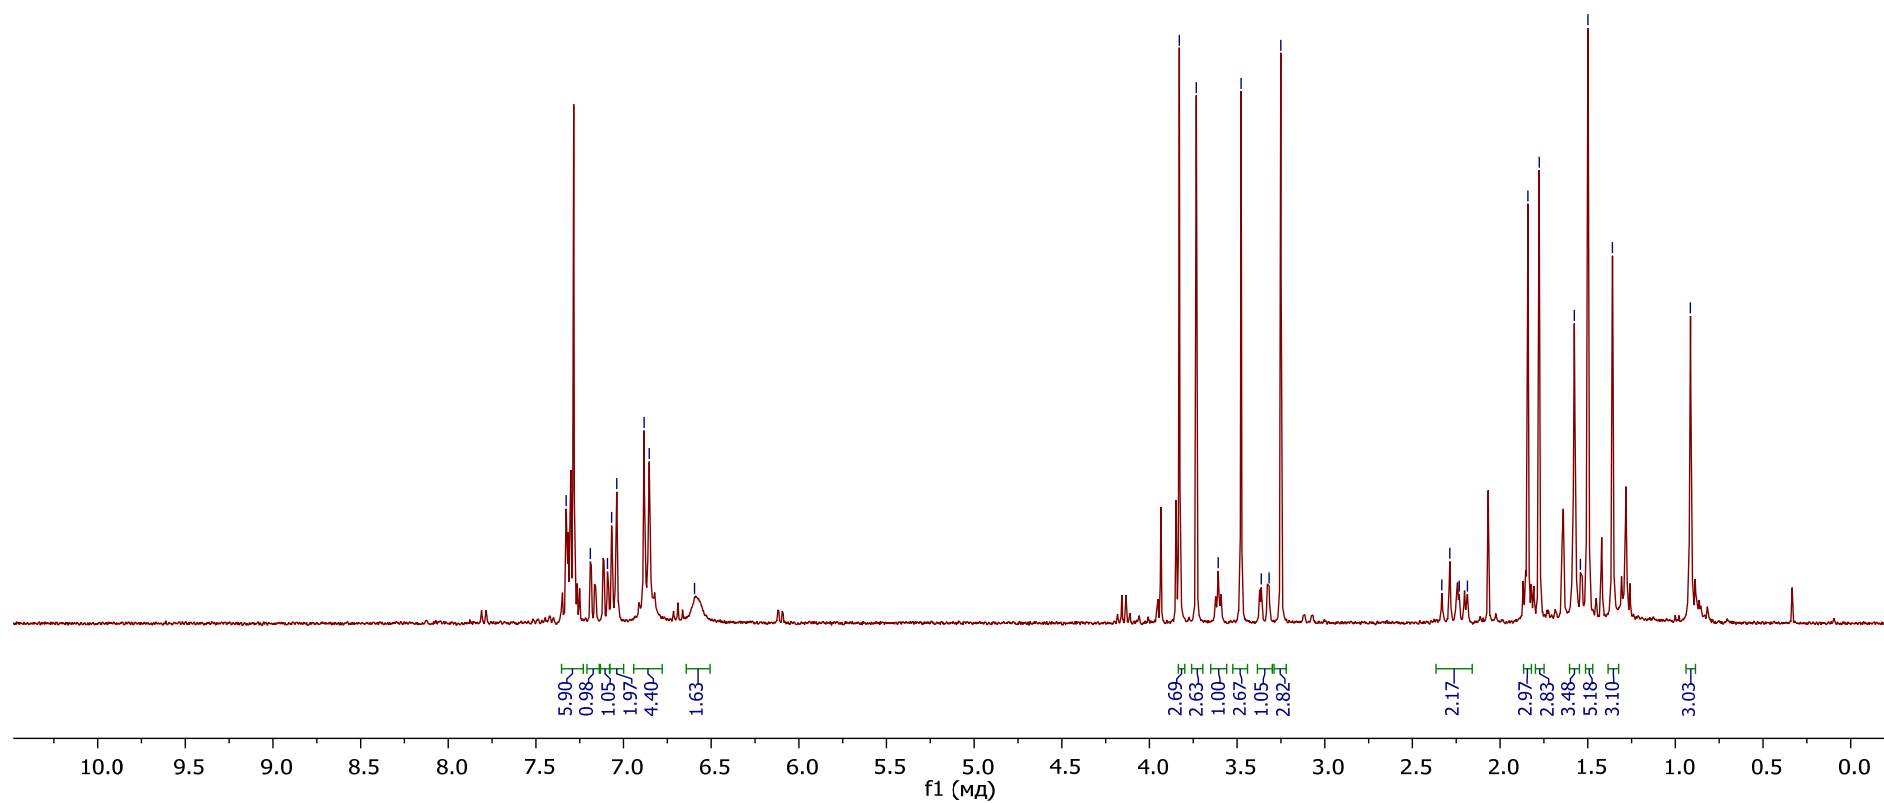



Diethyl (3*S*\*,3*aR*\*)-3-(4-methoxyphenyl)-3*a*-methyl-3,3*a*-dihydro-2*H*-benzo[d]isoxazolo[2,3-*b*]isoxazole-2,2-dicarboxylate 6*aa*

<sup>1</sup>H NMR (300 MHz, CDCl<sub>3</sub>)

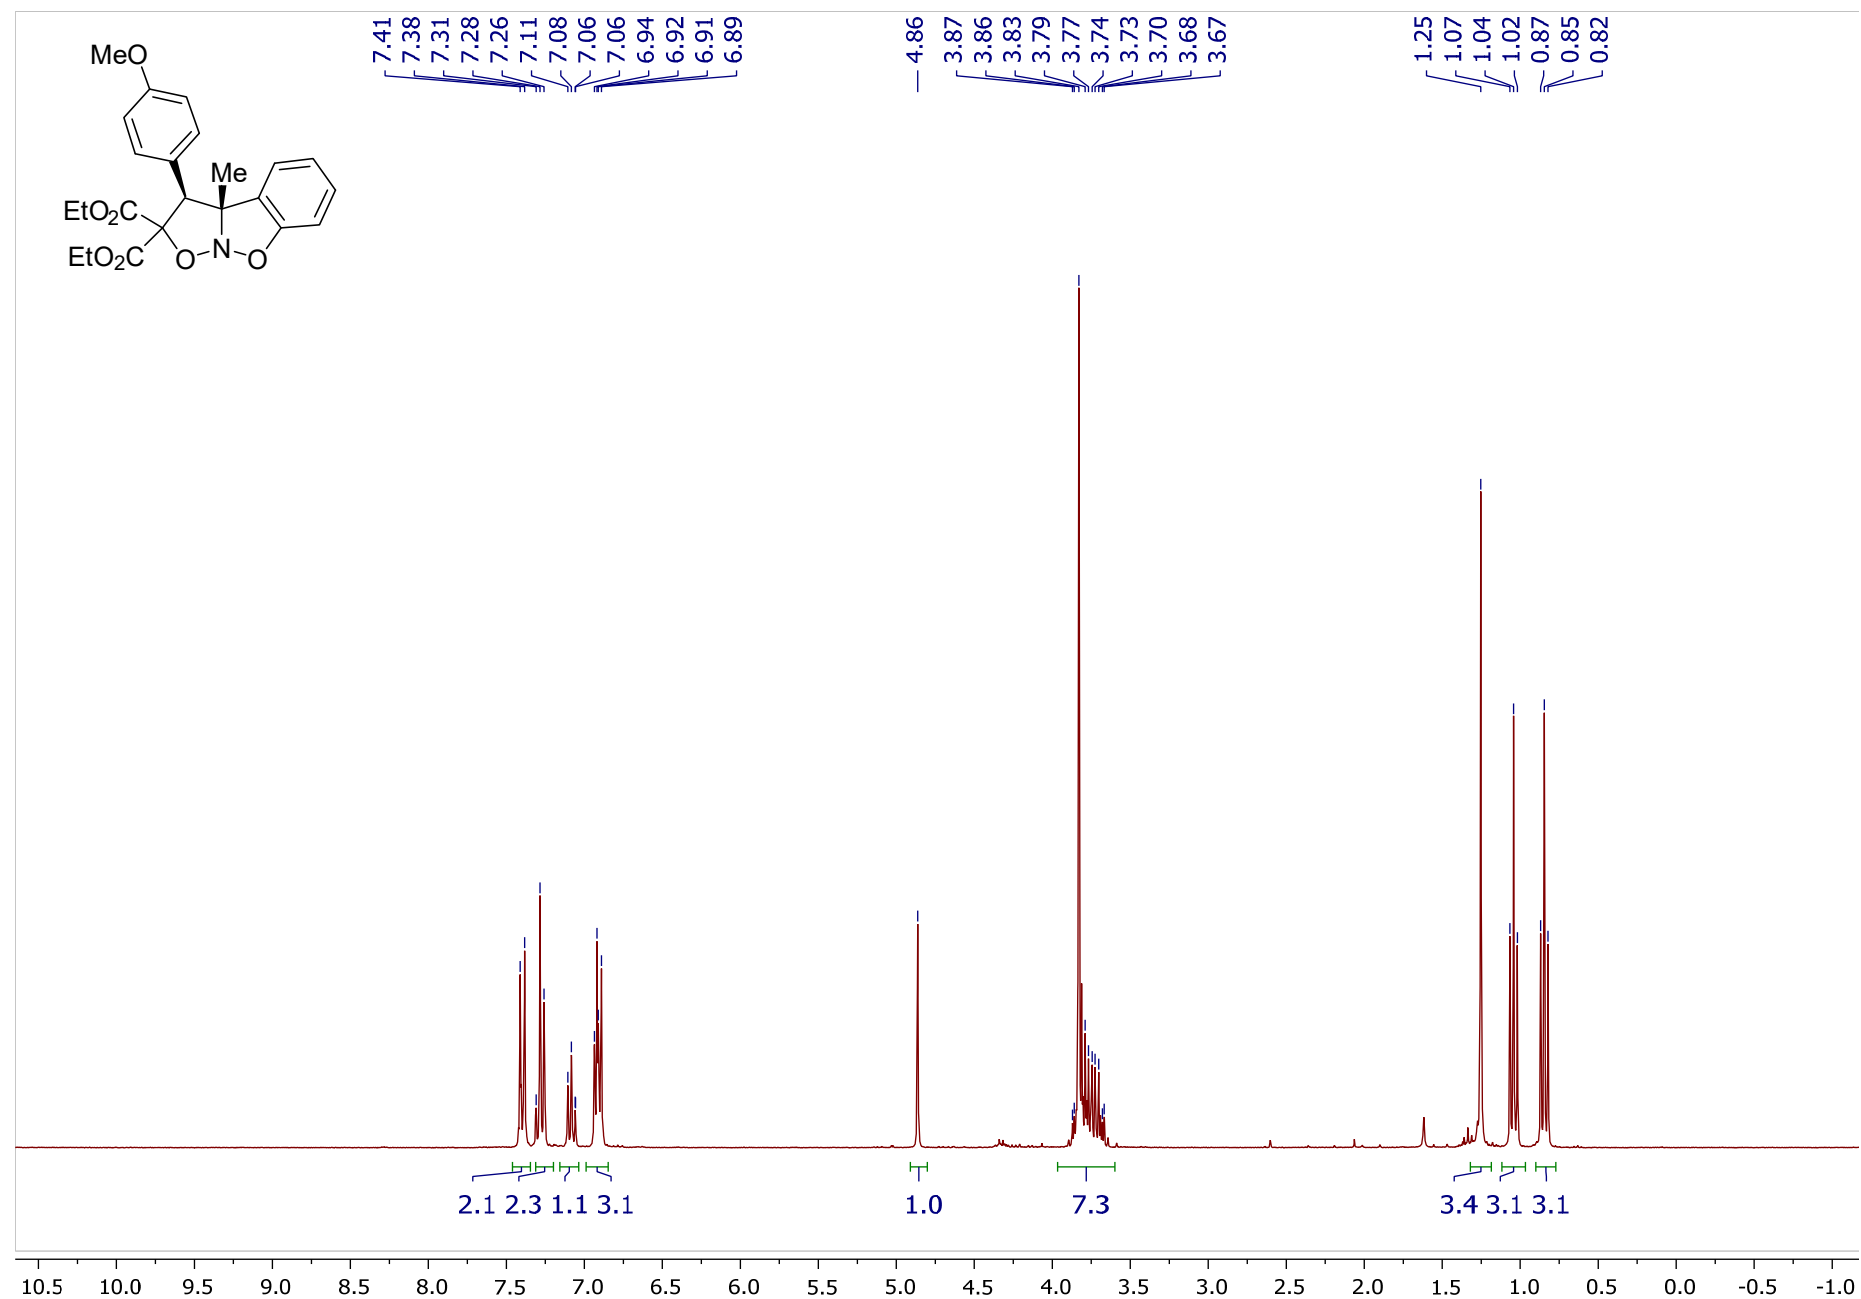

<sup>13</sup>C NMR (75 MHz, CDCl<sub>3</sub>)

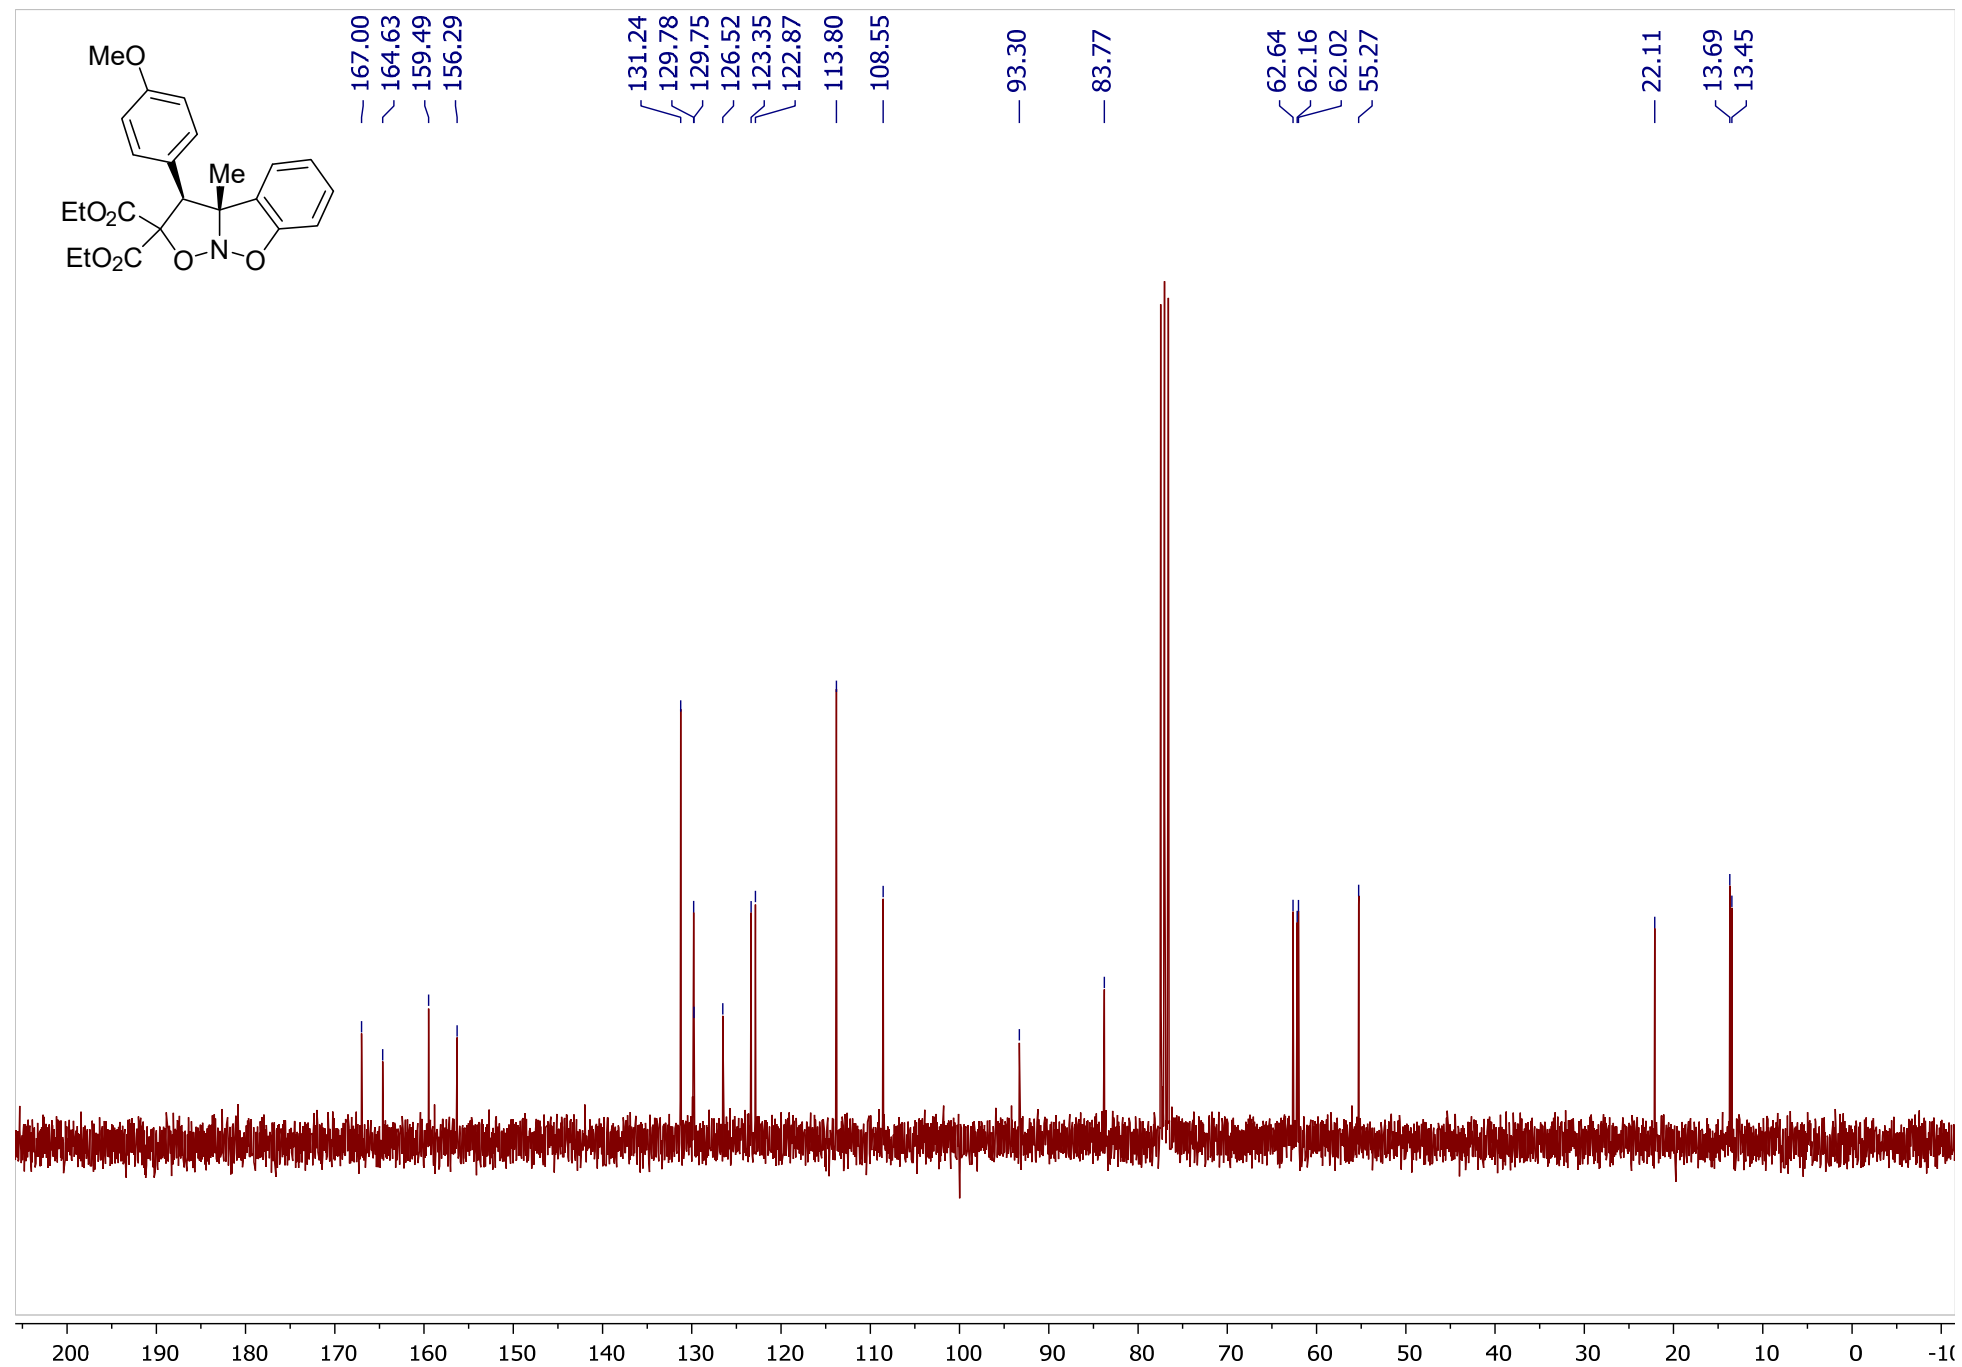

$^{13}\text{C}$  DEPT 135 (75 MHz,  $\text{CDCl}_3$ )

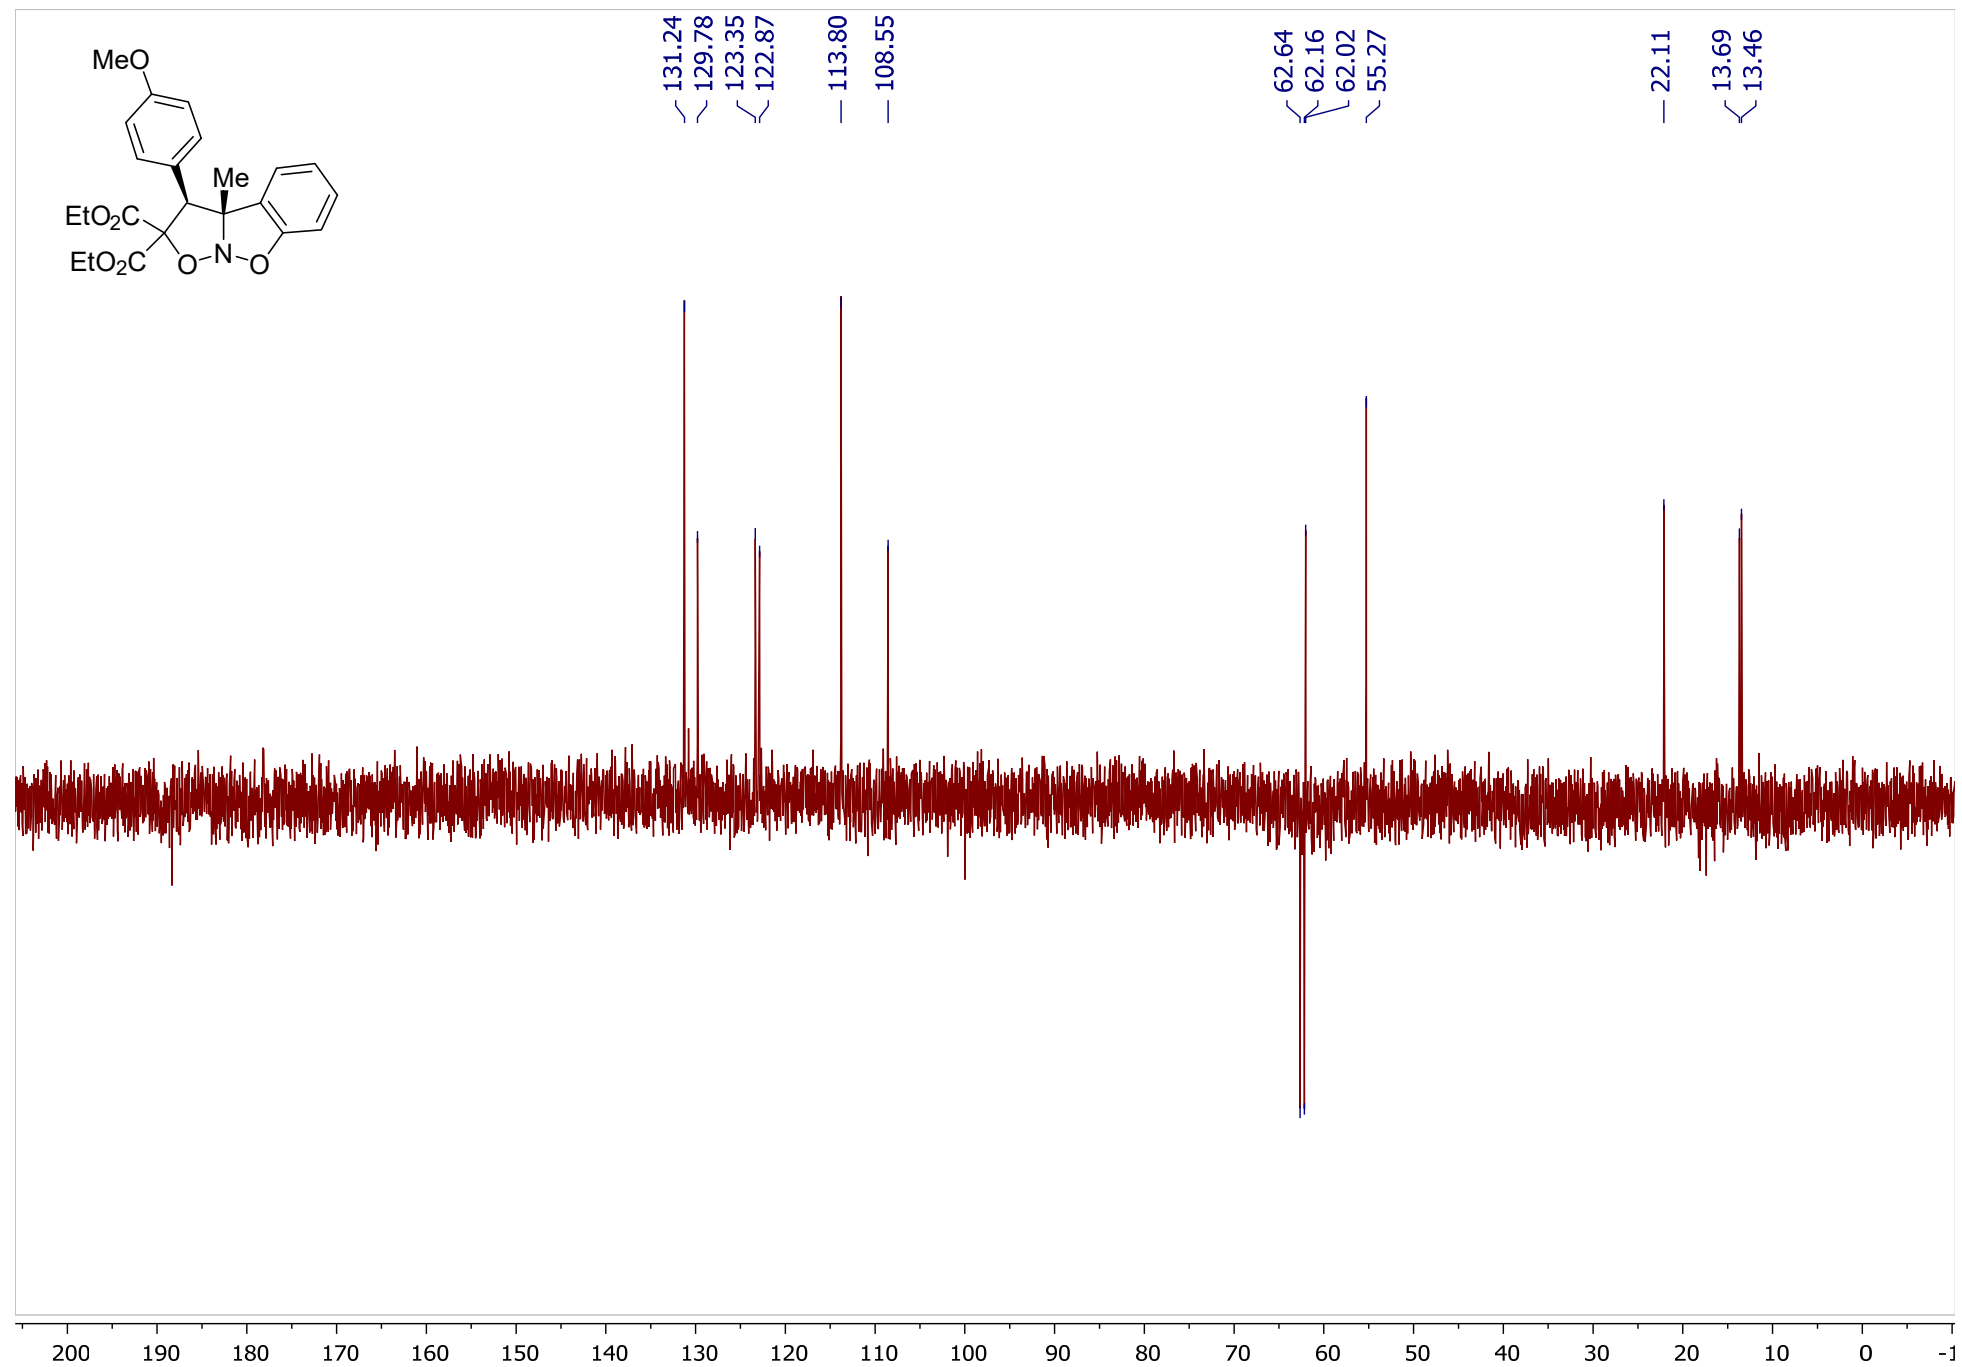

$^1\text{H}$ - $^1\text{H}$  NOESY

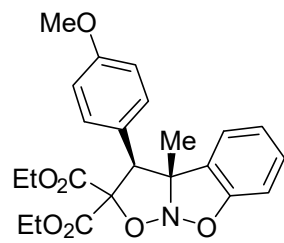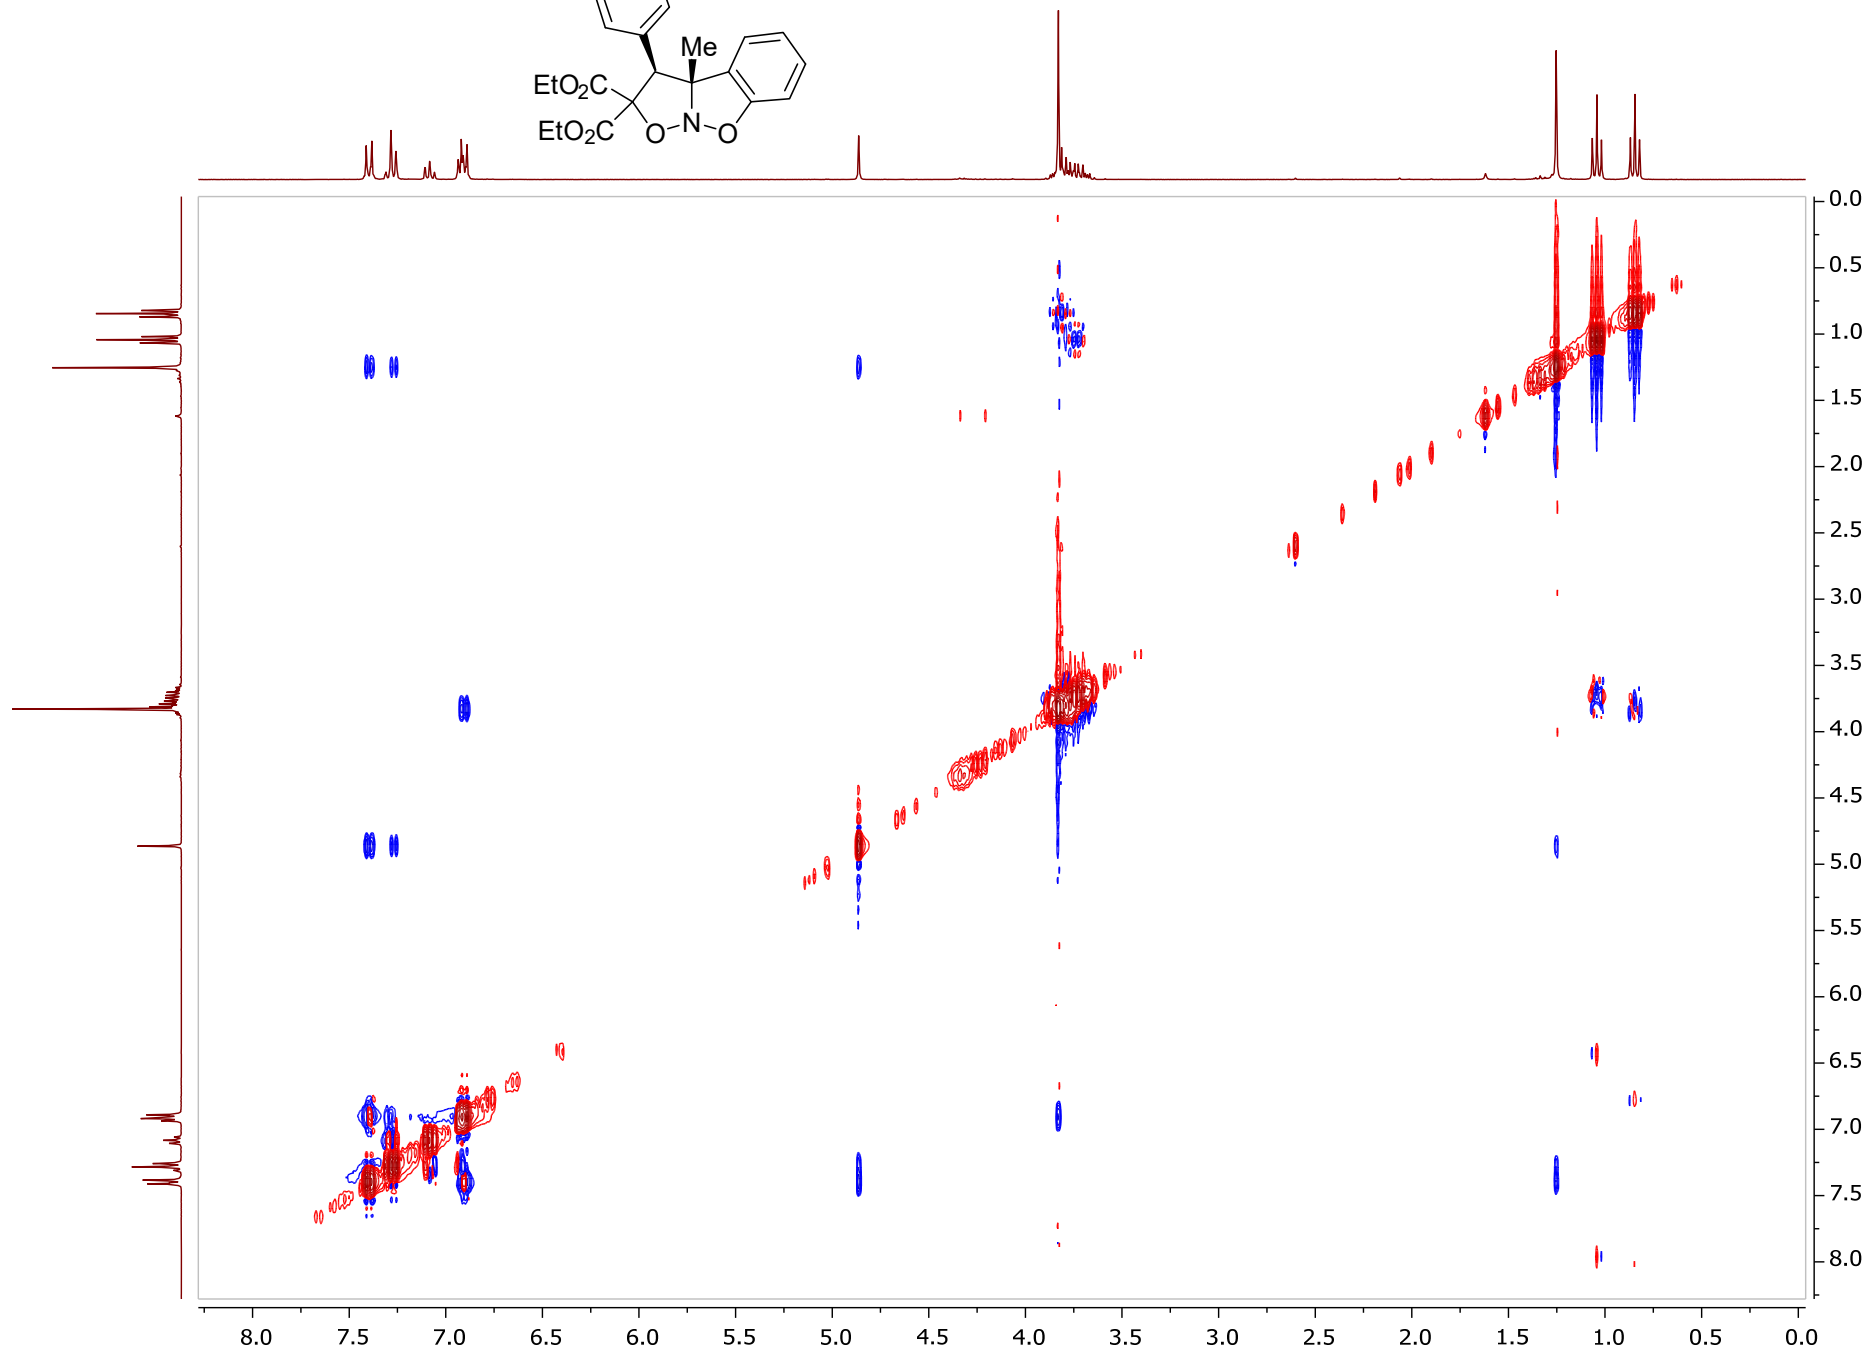

S268

Diethyl (3*S*\*,3*aR*\*)-3-(2-fluorophenyl)-3*a*-methyl-3,3*a*-dihydro-2*H*-benzo[d]isoxazolo[2,3-*b*]isoxazole-2,2-dicarboxylate 6*ba*

<sup>1</sup>H NMR (300 MHz, CDCl<sub>3</sub>)

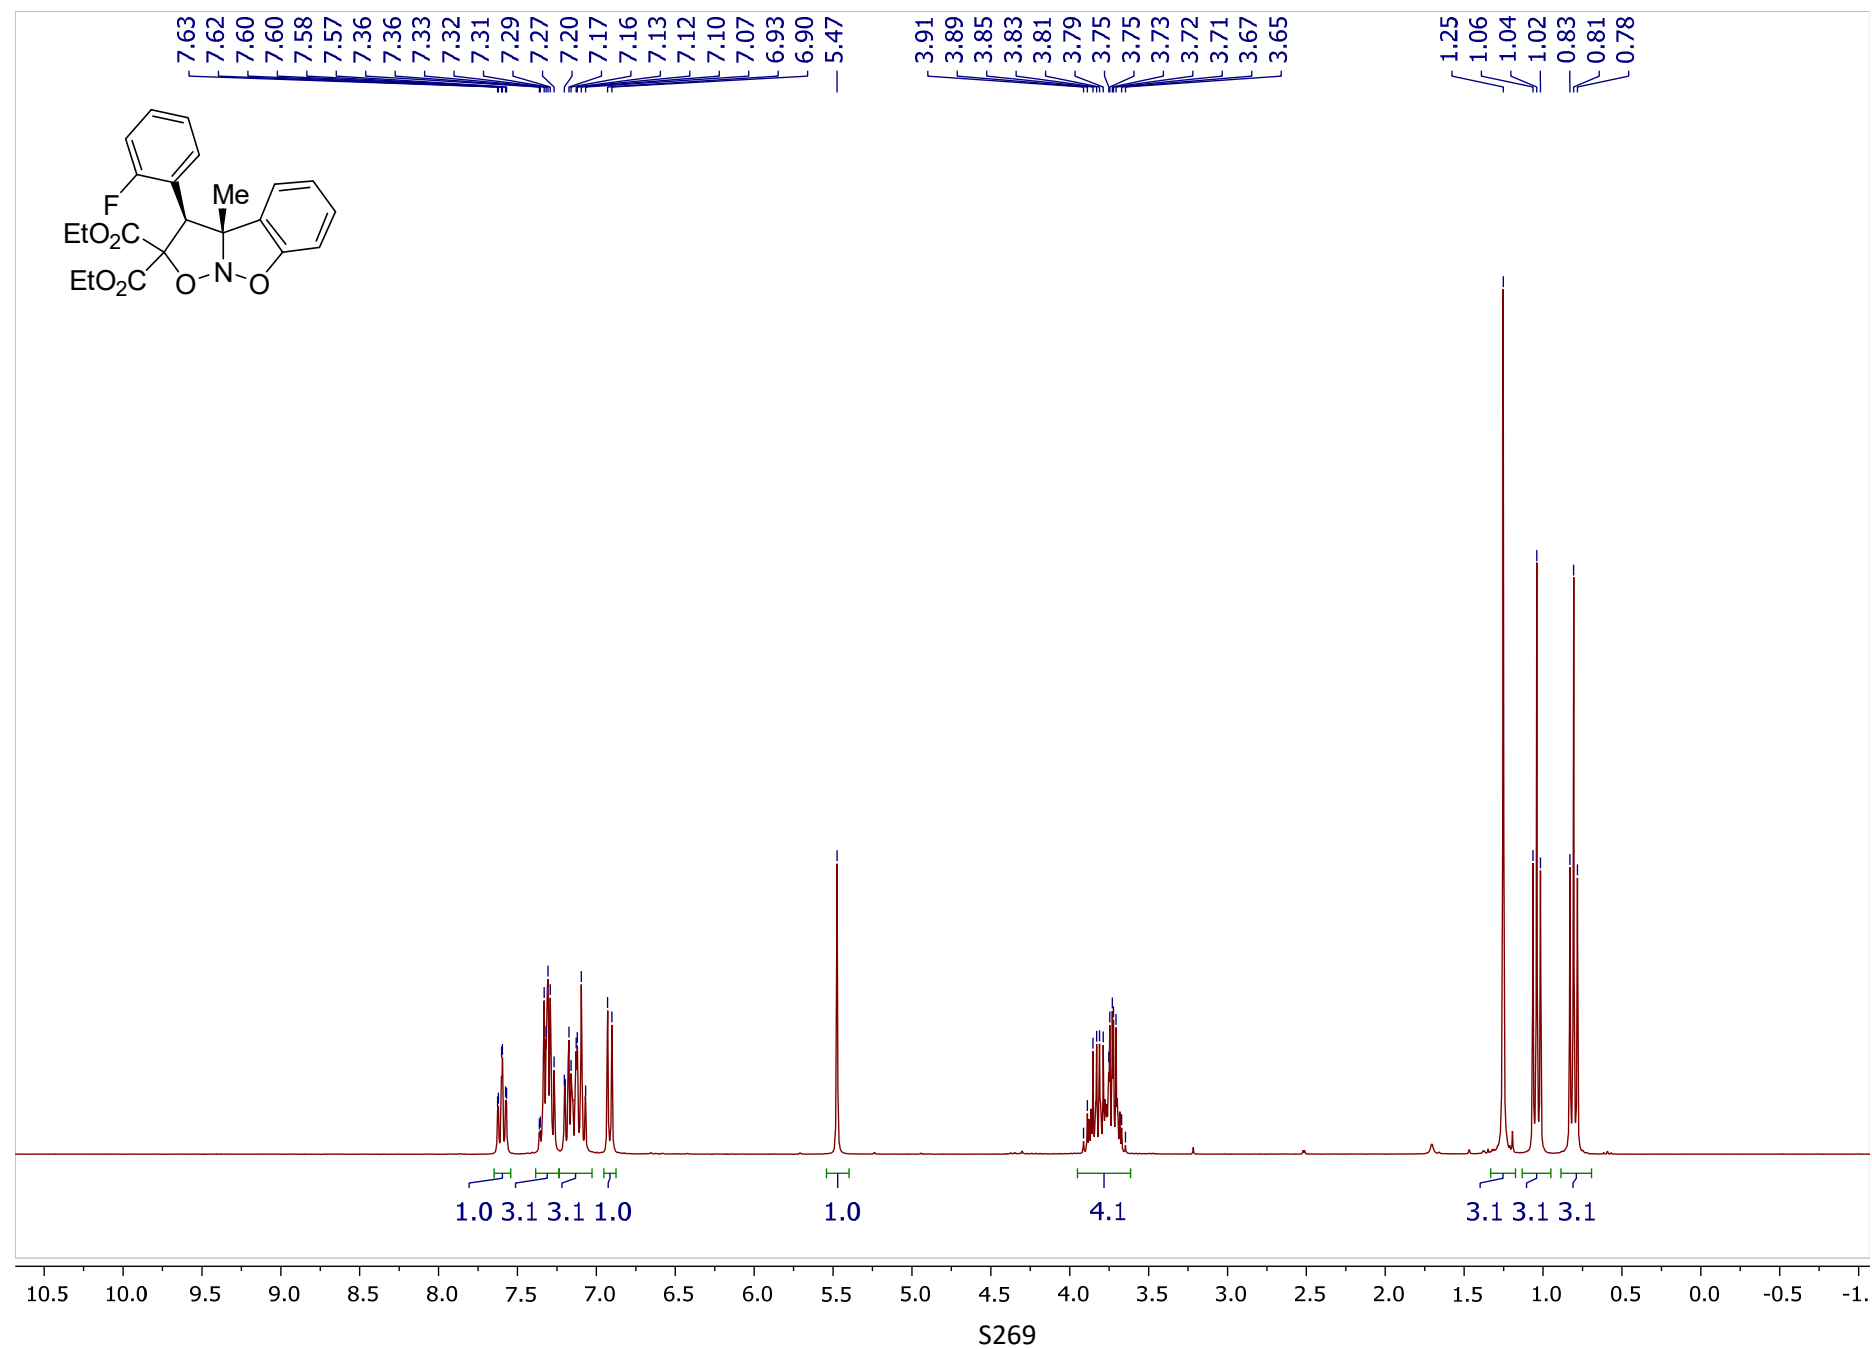

$^{13}\text{C}$  NMR (75 MHz,  $\text{CDCl}_3$ )

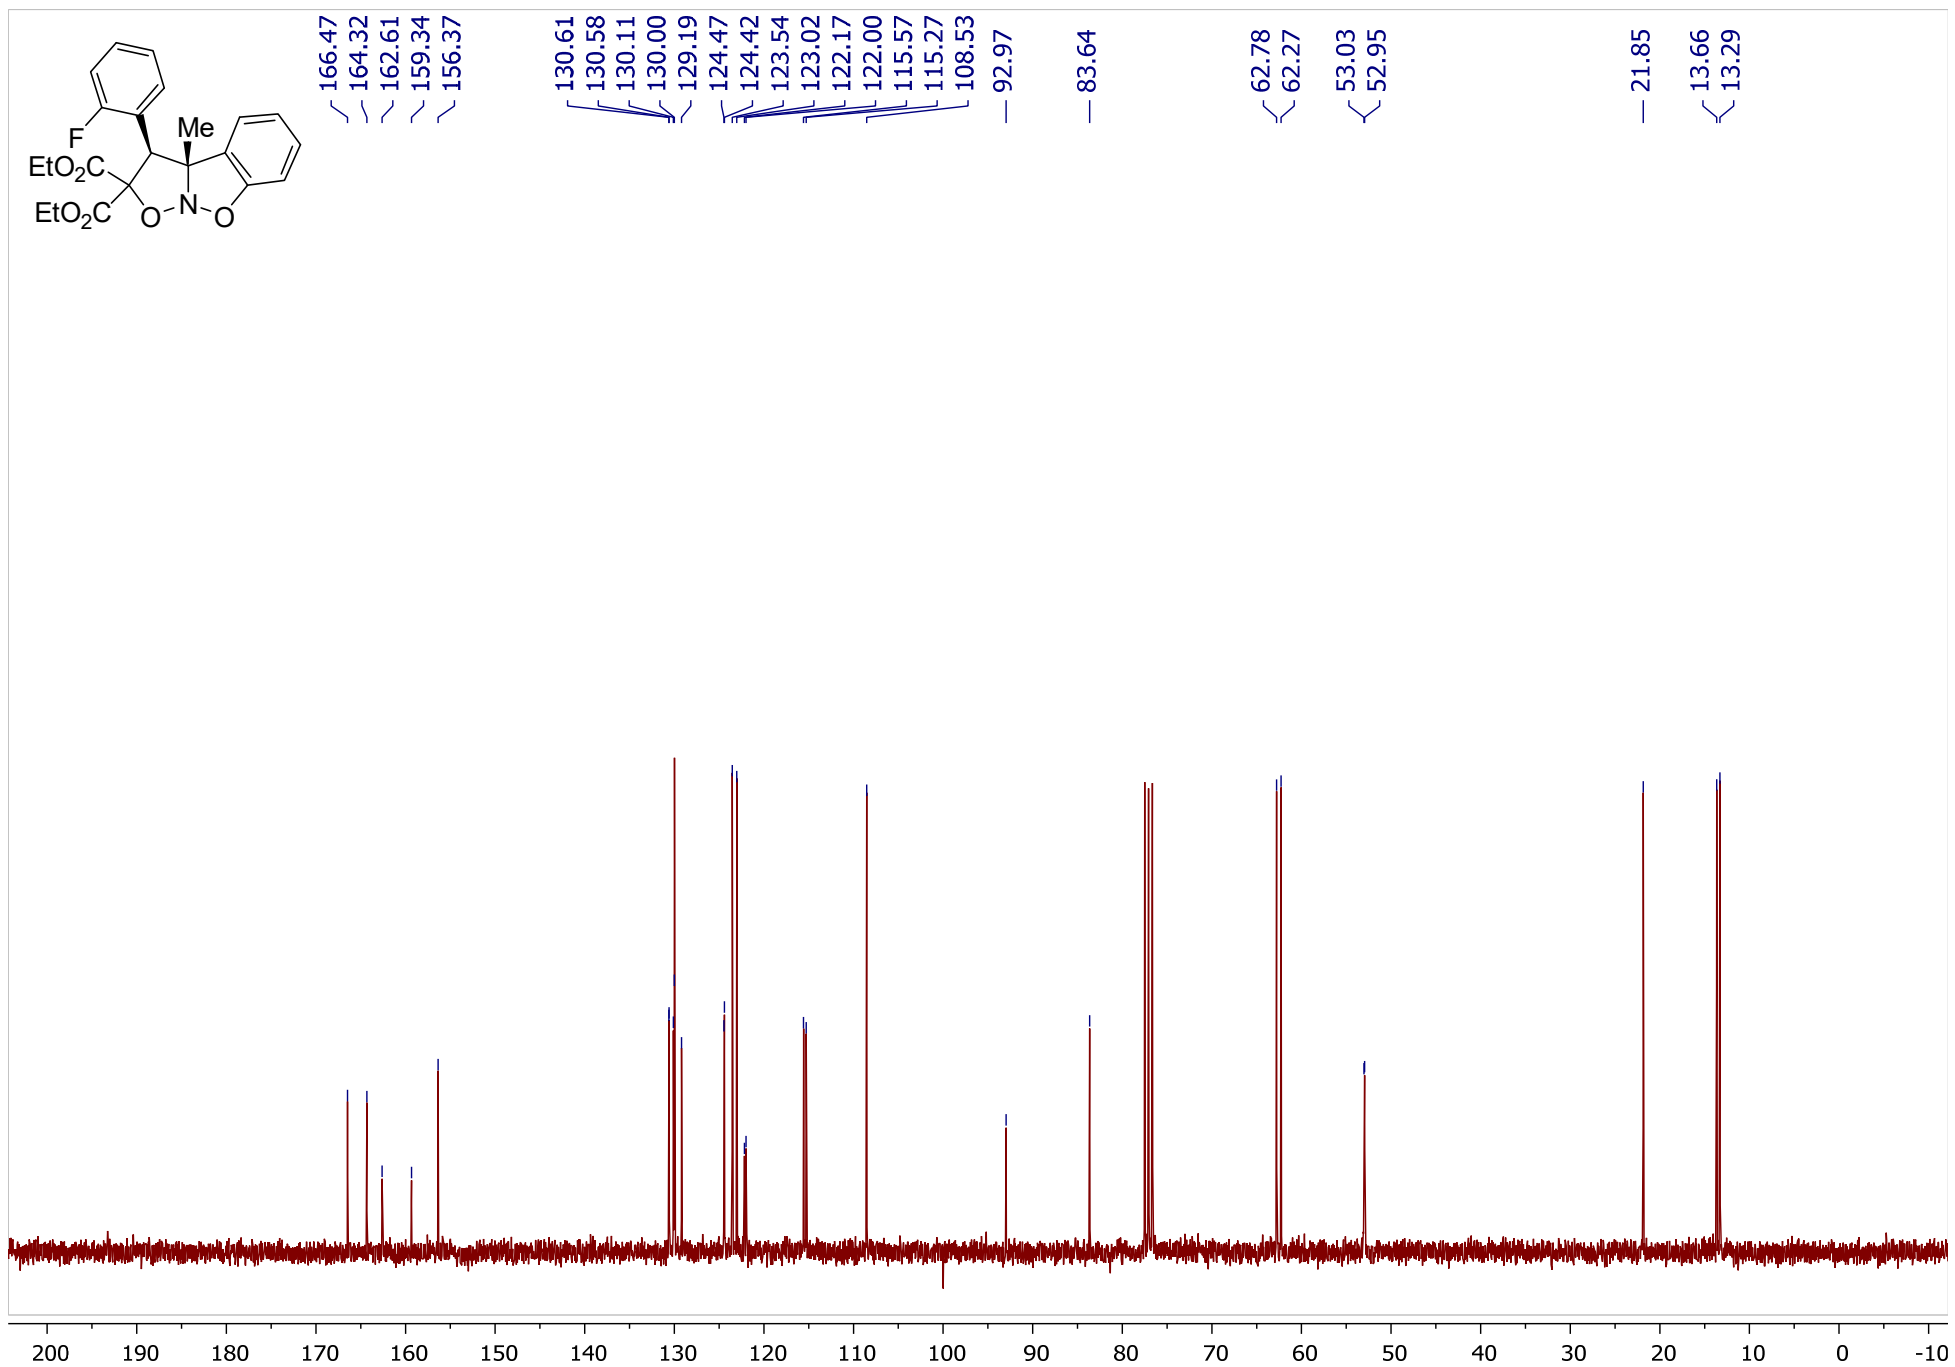

$^{13}\text{C}$  DEPT 135 (75 MHz,  $\text{CDCl}_3$ )

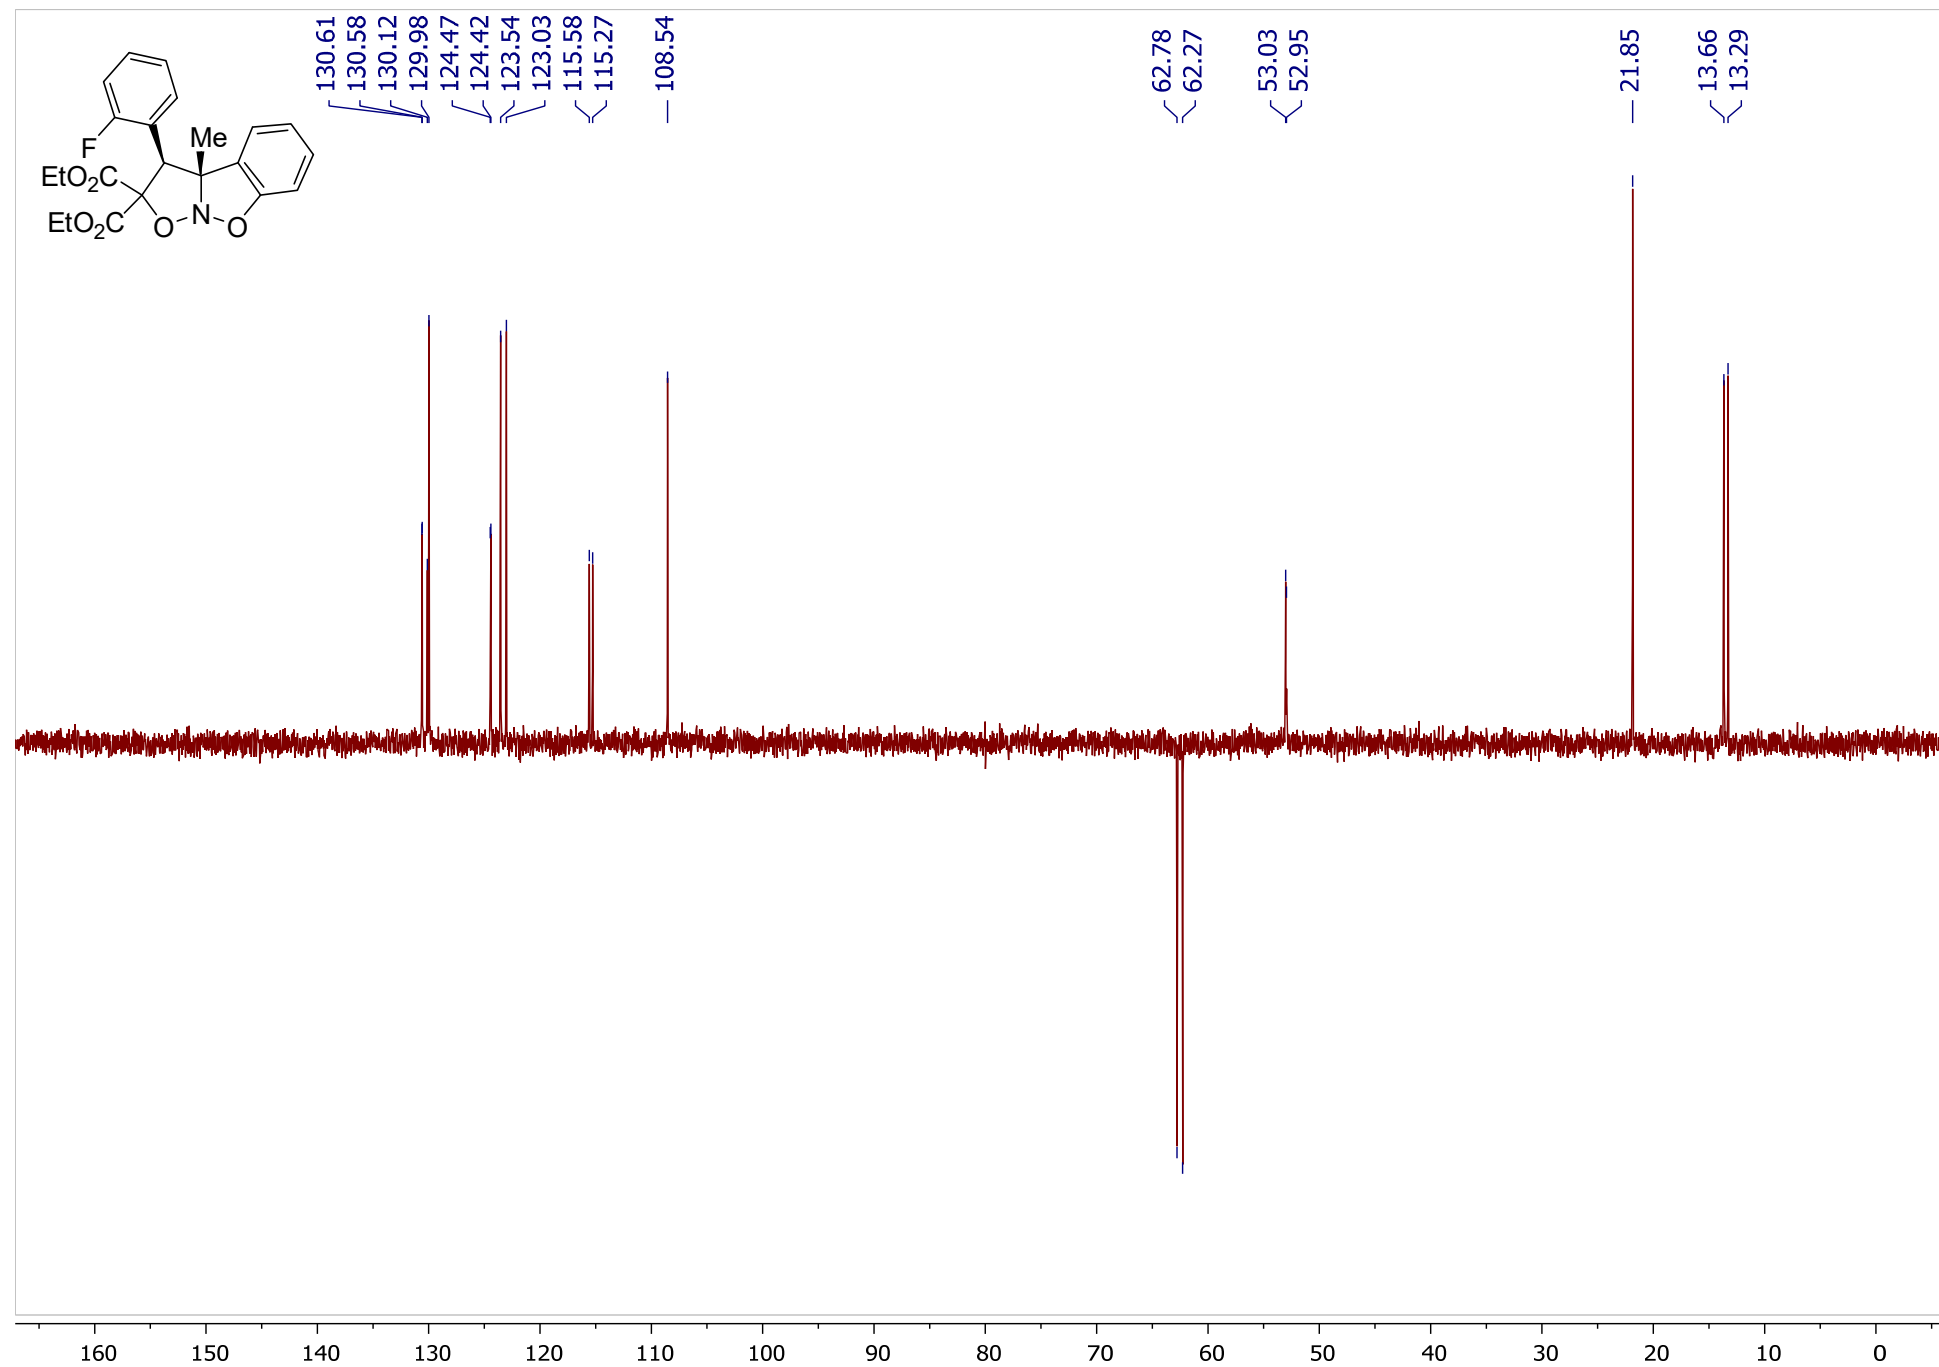

$^{19}\text{F}$  NMR (282 MHz,  $\text{CDCl}_3$ )

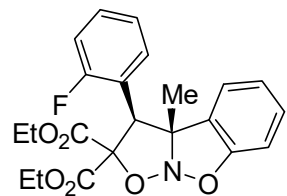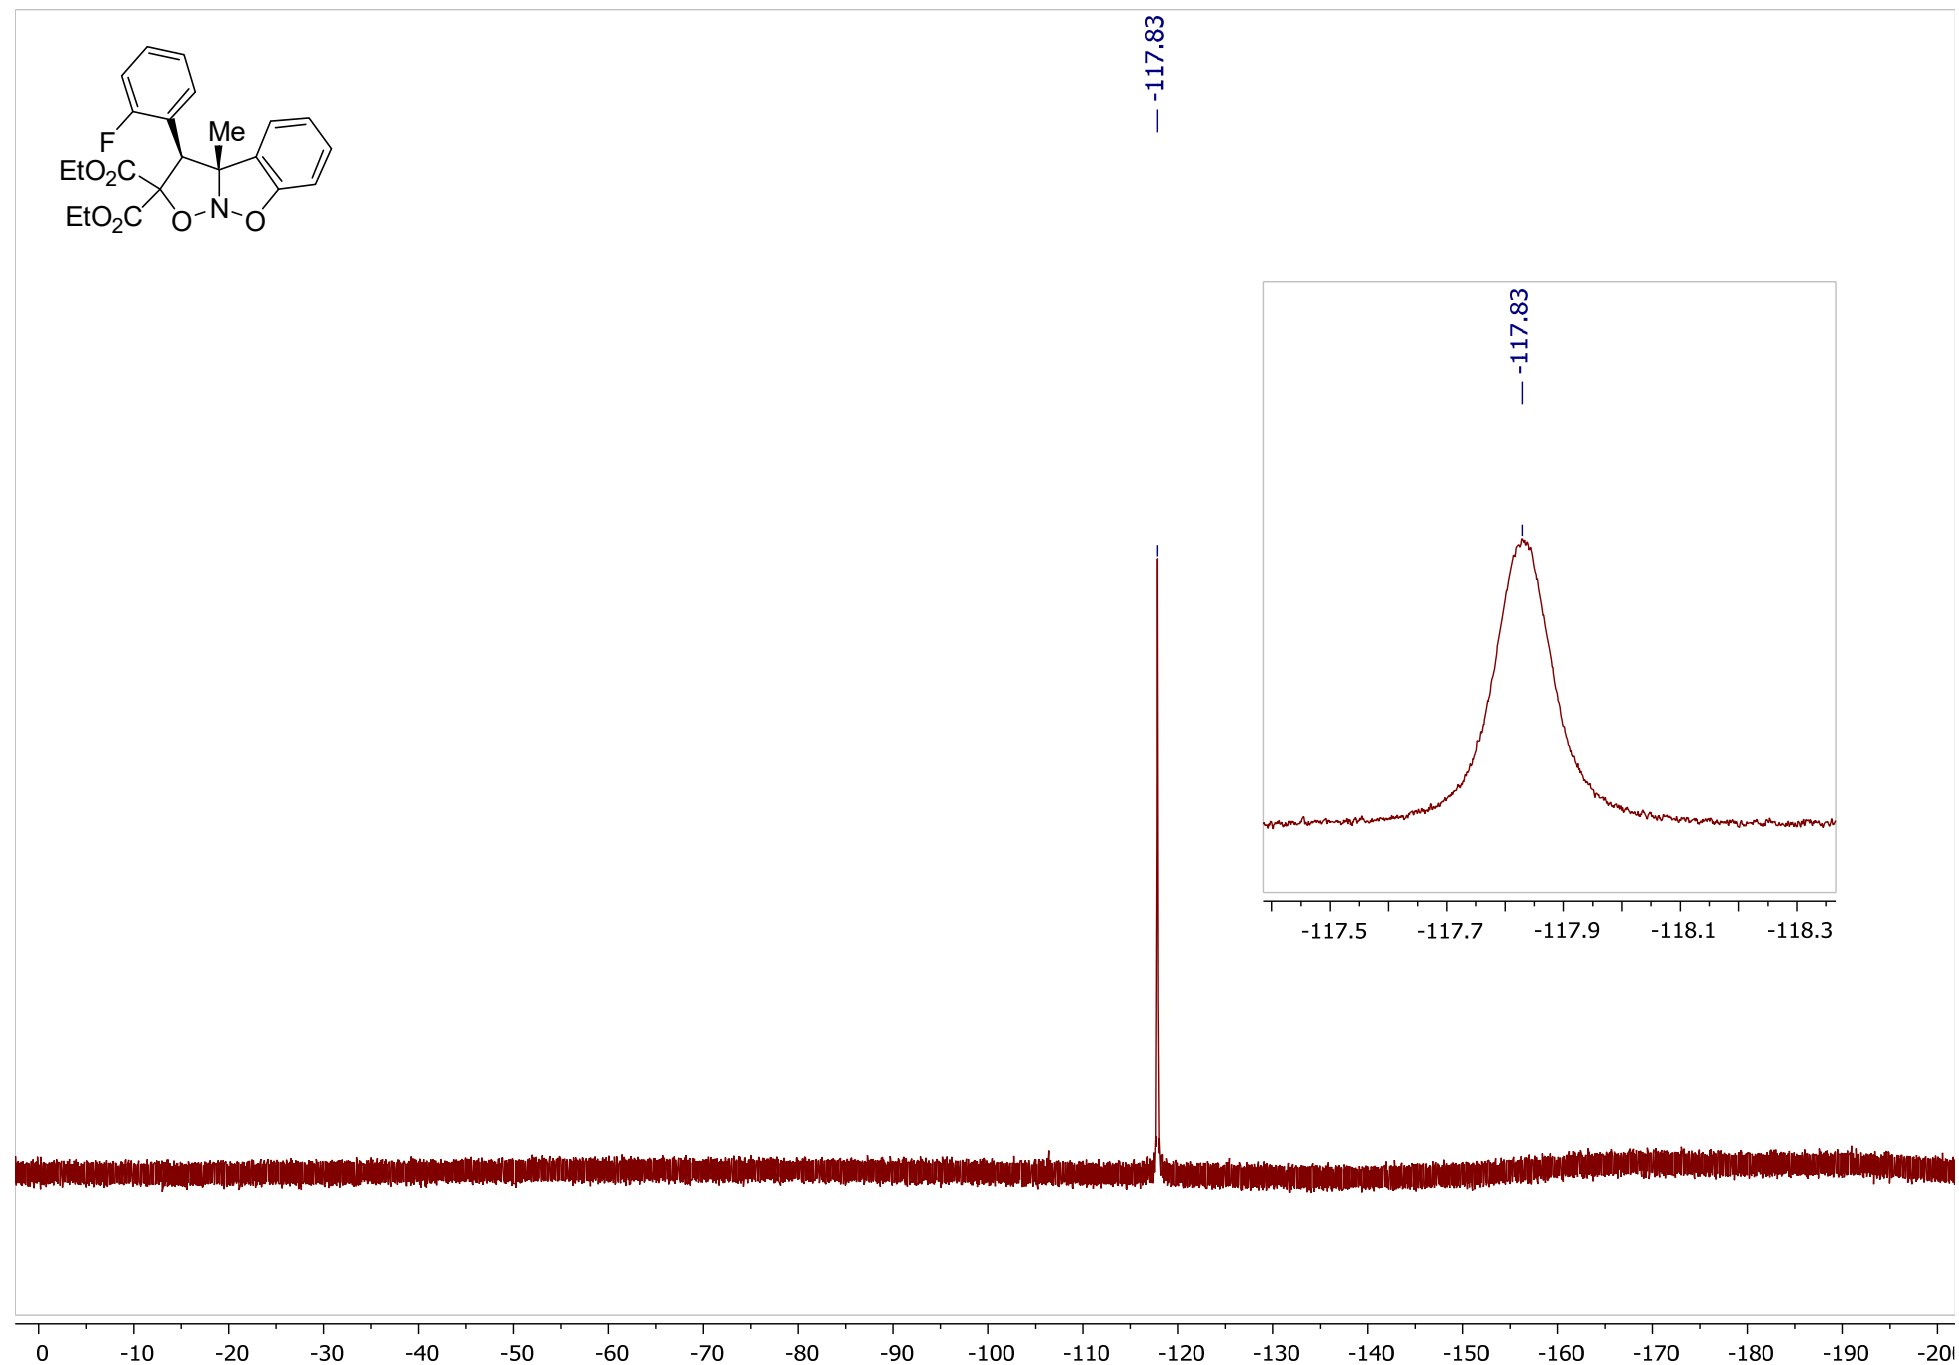



$^1\text{H}$ - $^1\text{H}$  COSY

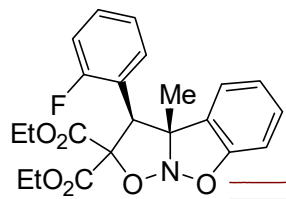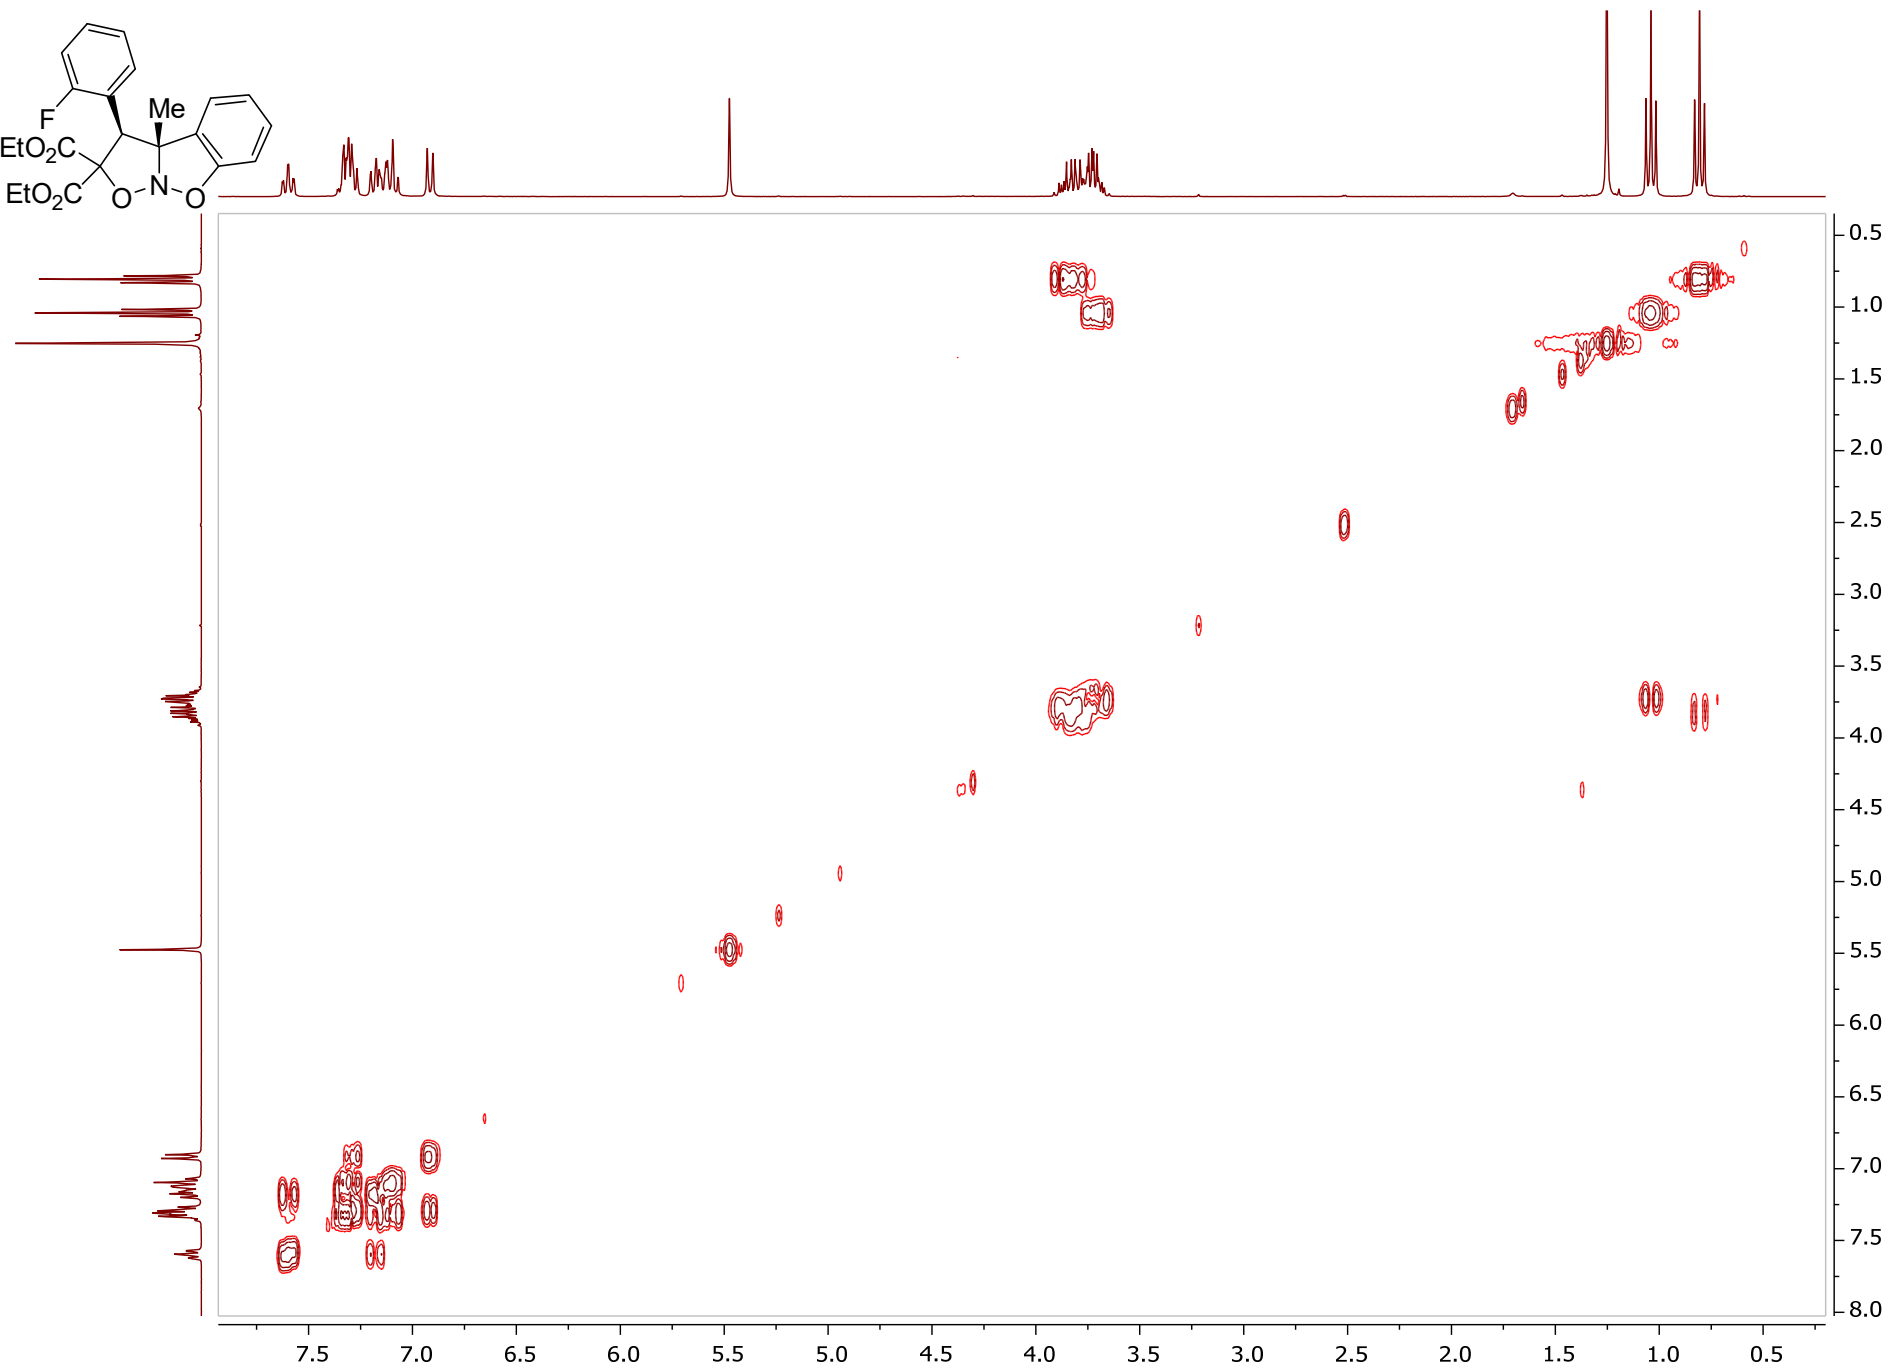

$^1\text{H}$ - $^{13}\text{C}$  HSQC

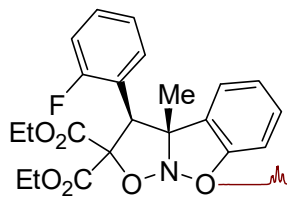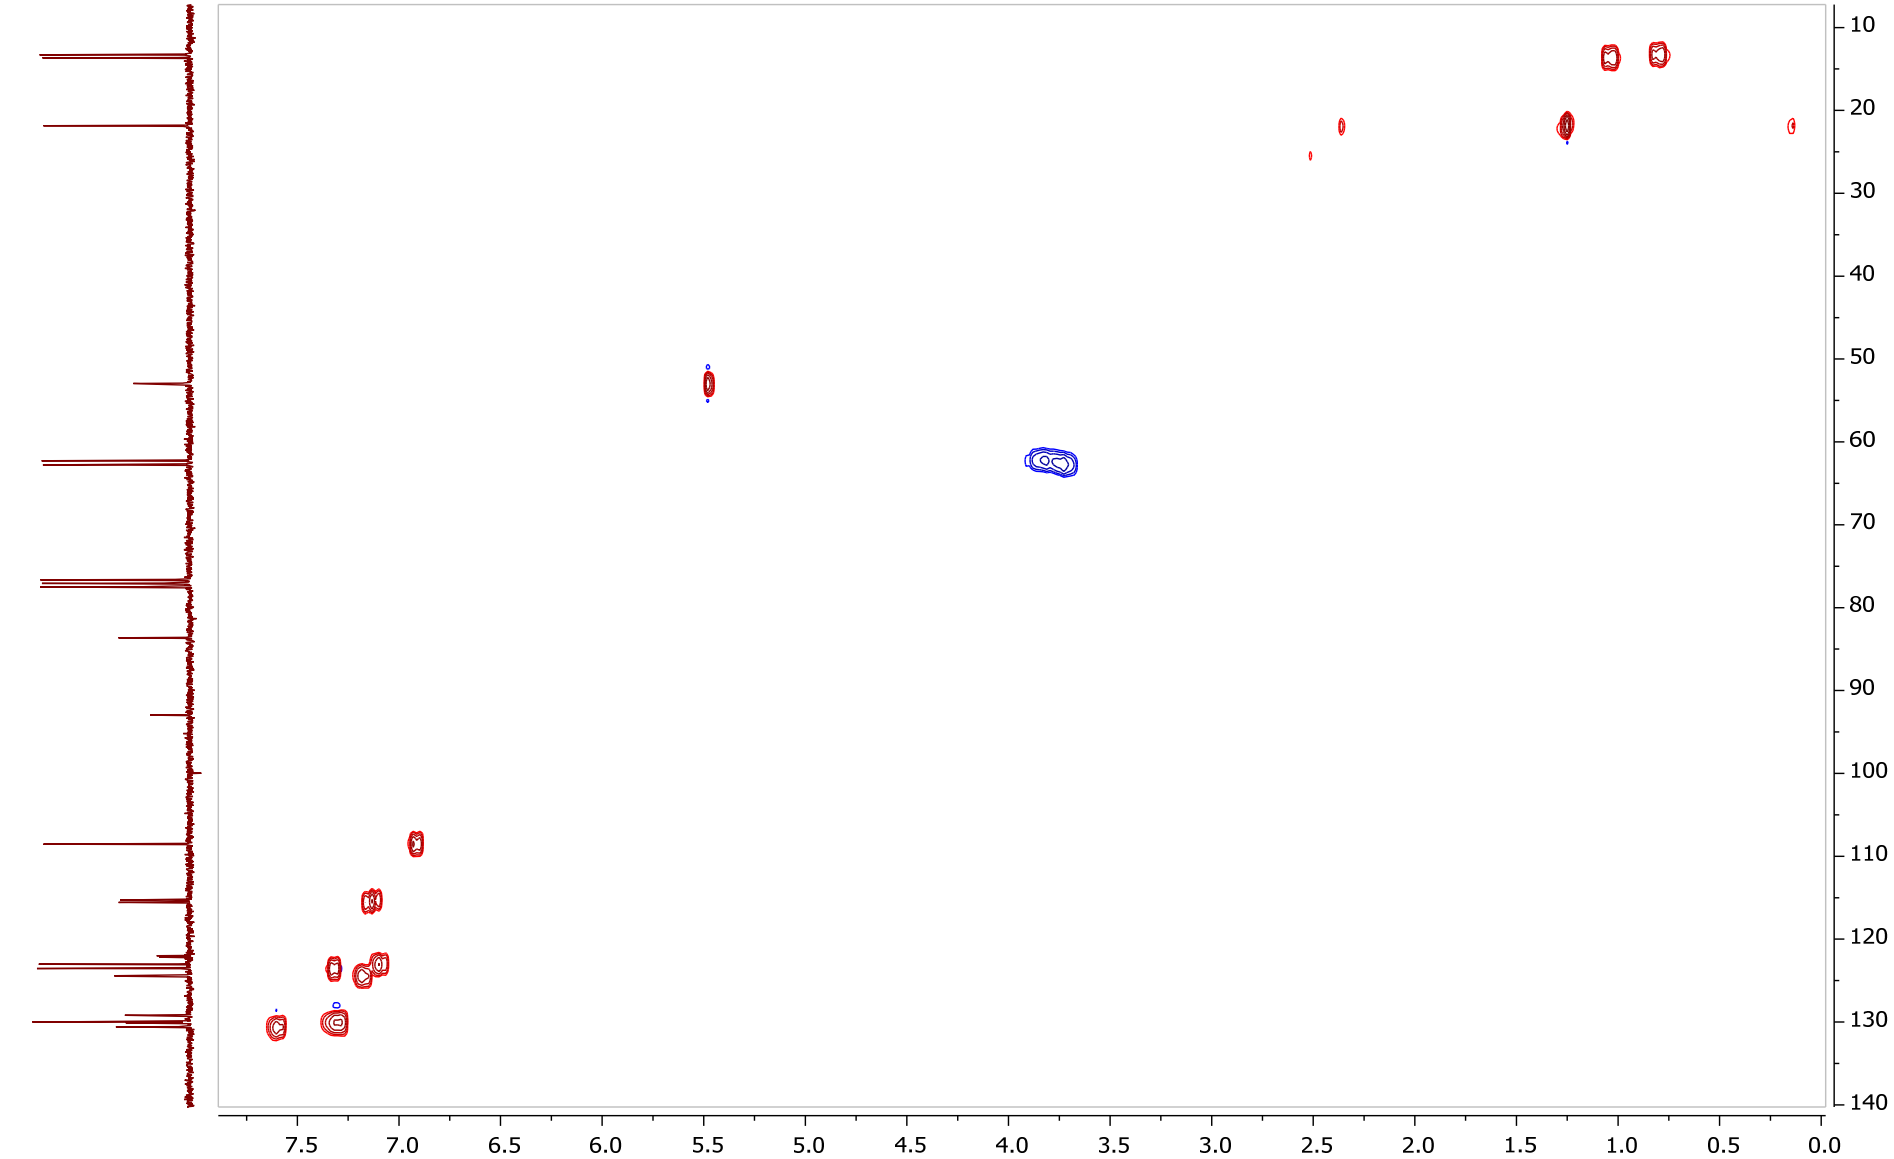



$^1\text{H}$ - $^1\text{H}$  NOESY

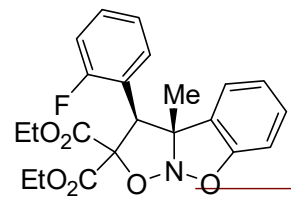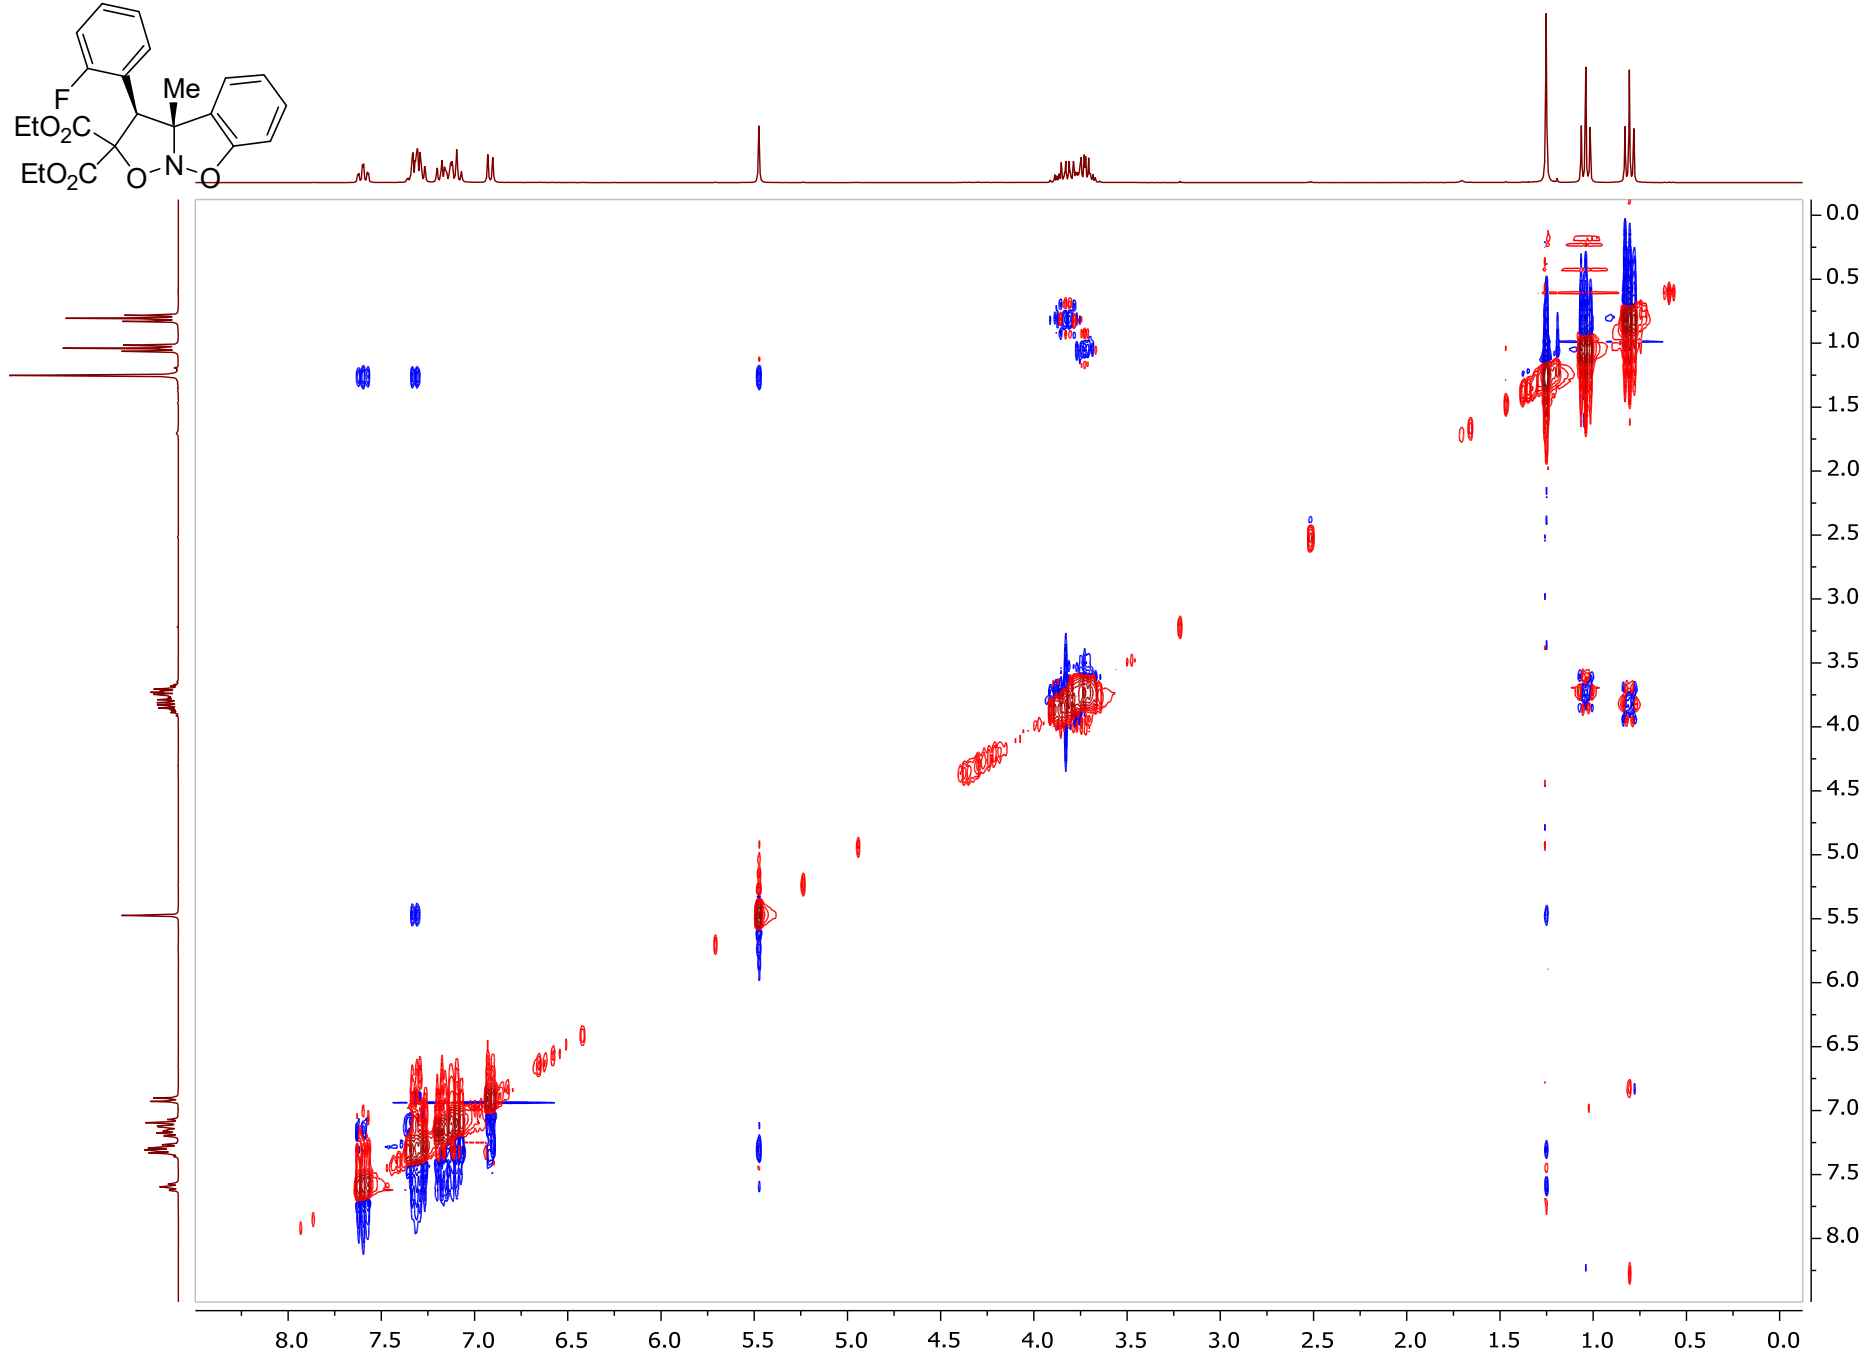

Diethyl (3S\*,3aS\*)-3-(4-methoxyphenyl)-3a-phenyl-3,3a-dihydro-2H-benzo[d]isoxazolo[2,3-b]isoxazole-2,2-dicarboxylate 6ca

$^1\text{H}$  NMR (300 MHz,  $\text{CDCl}_3$ )

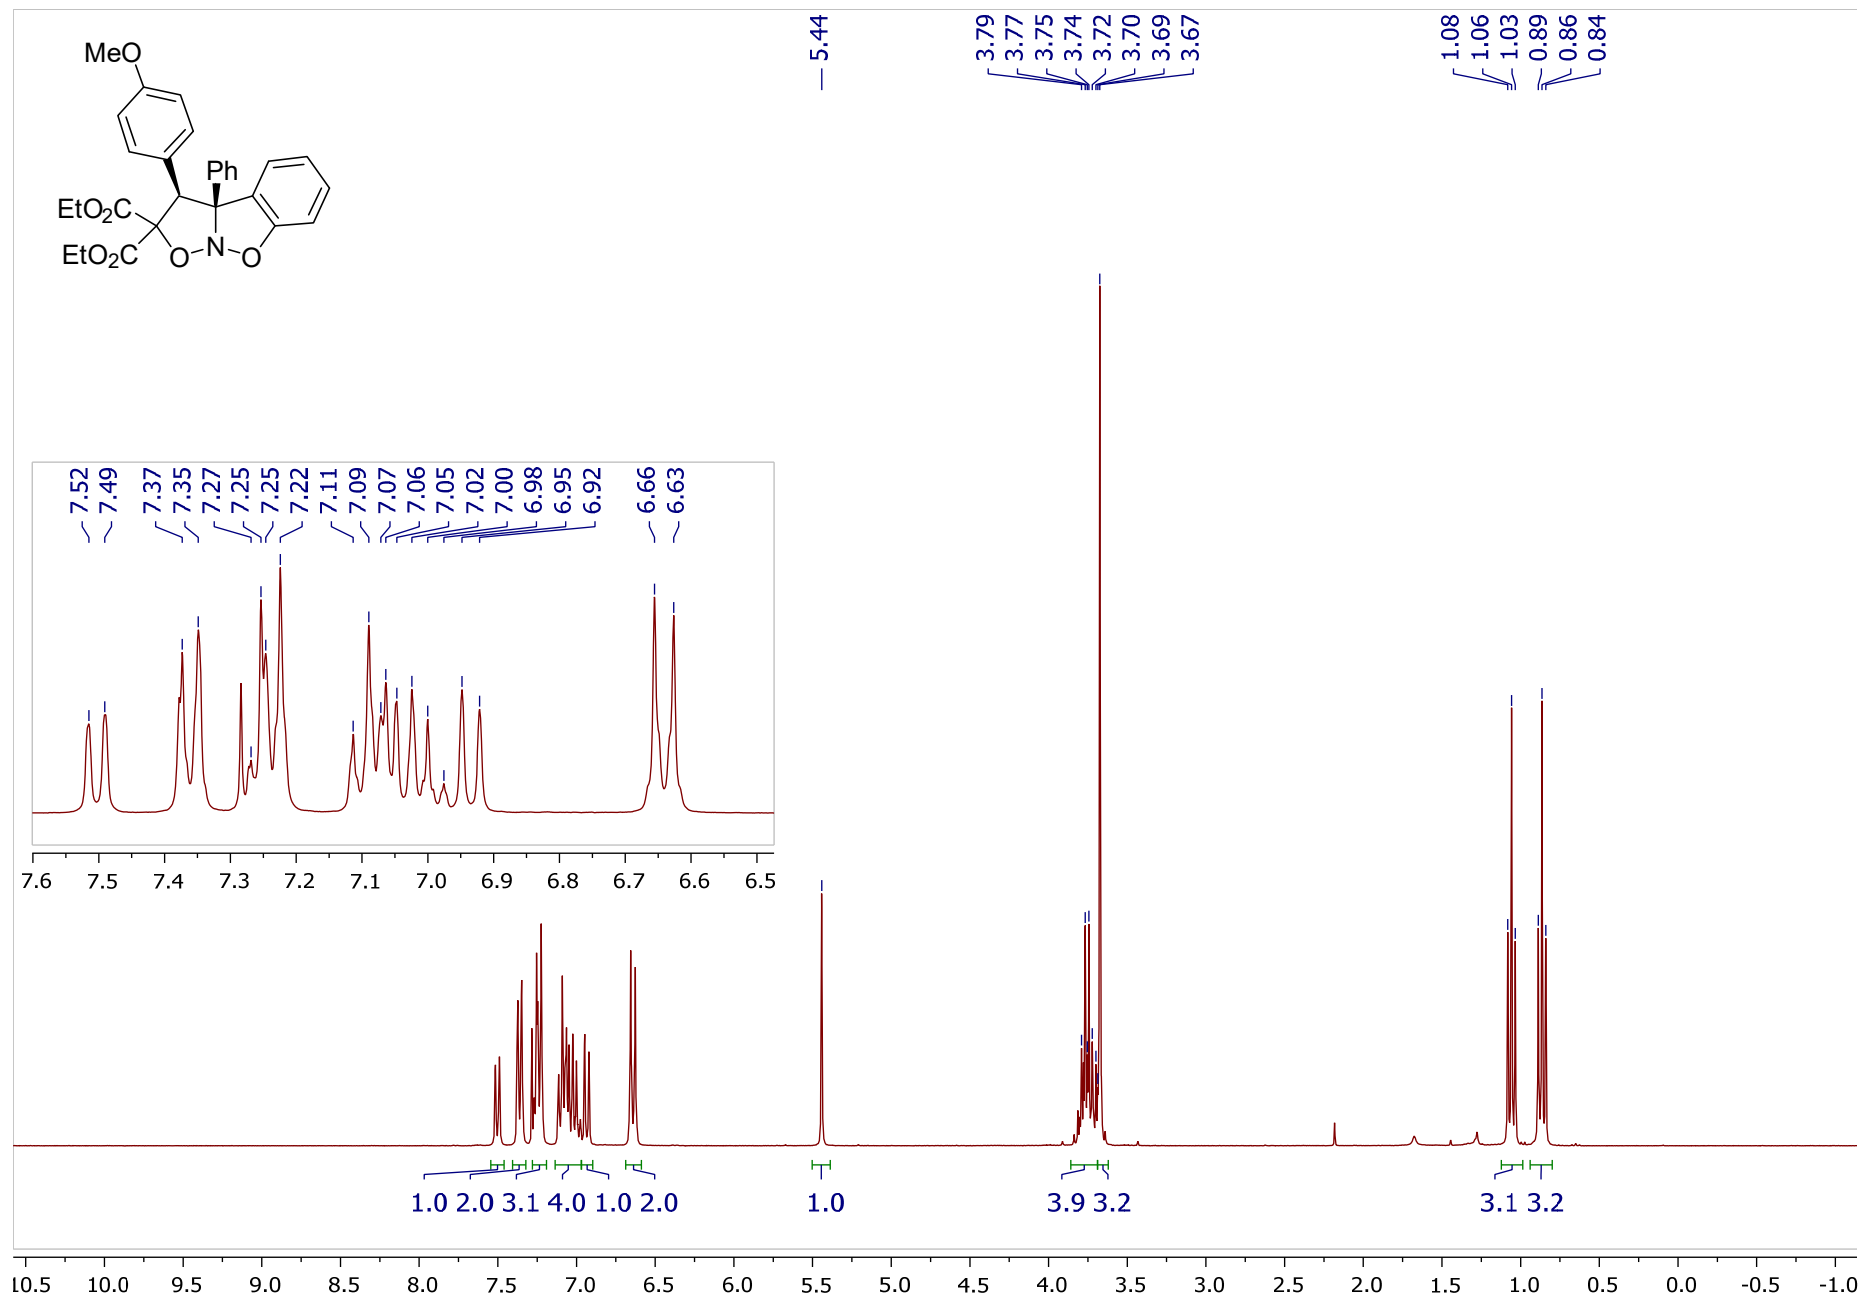

$^{13}\text{C}$  NMR (75 MHz,  $\text{CDCl}_3$ )

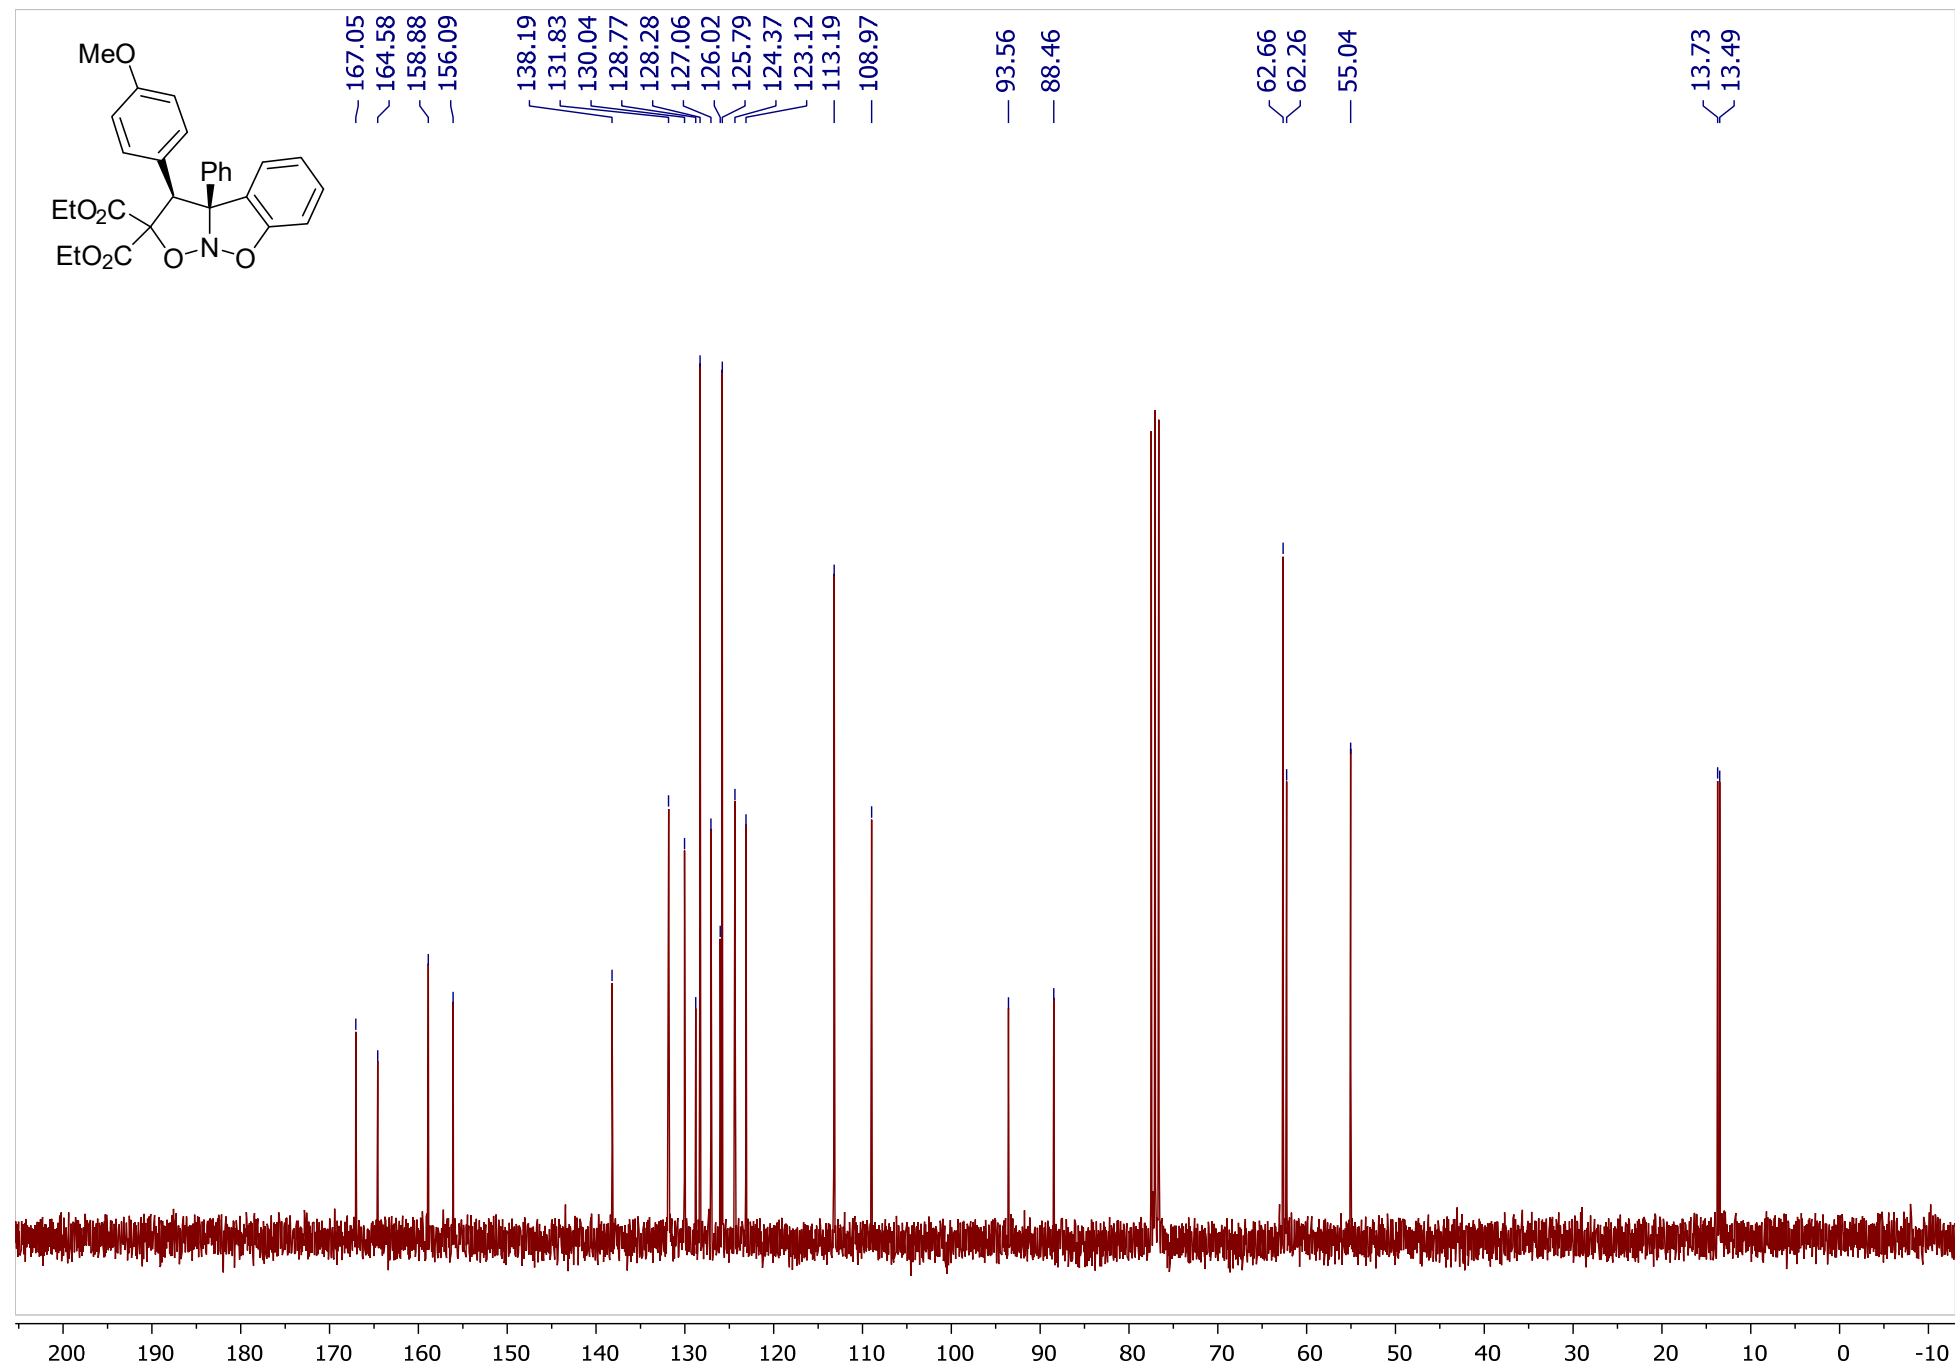

<sup>13</sup>C DEPT 135 (75 MHz, CDCl<sub>3</sub>)

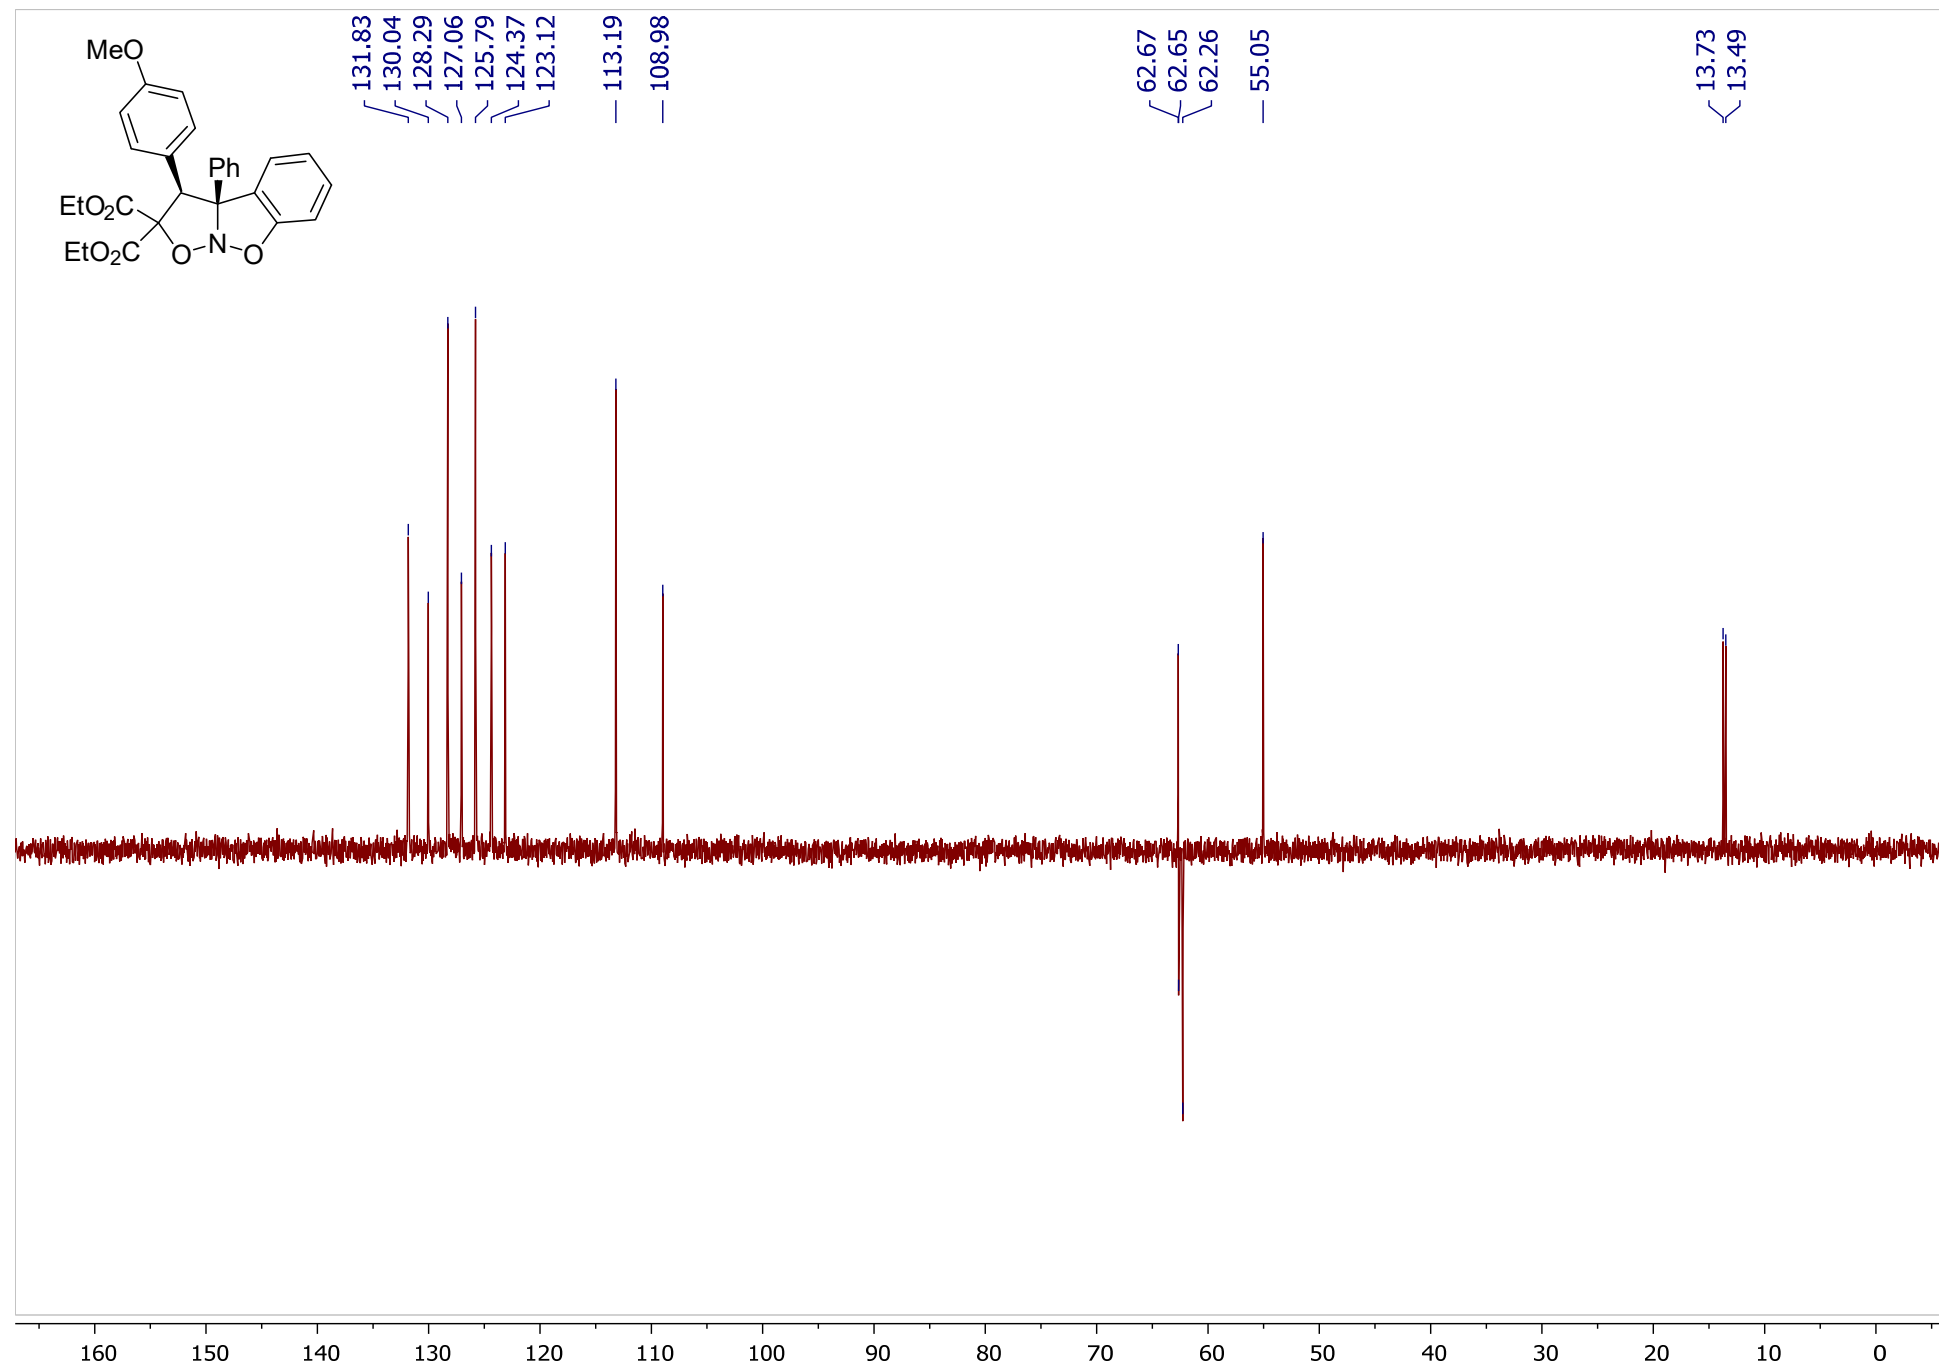

$^1\text{H}$ - $^1\text{H}$  COSY

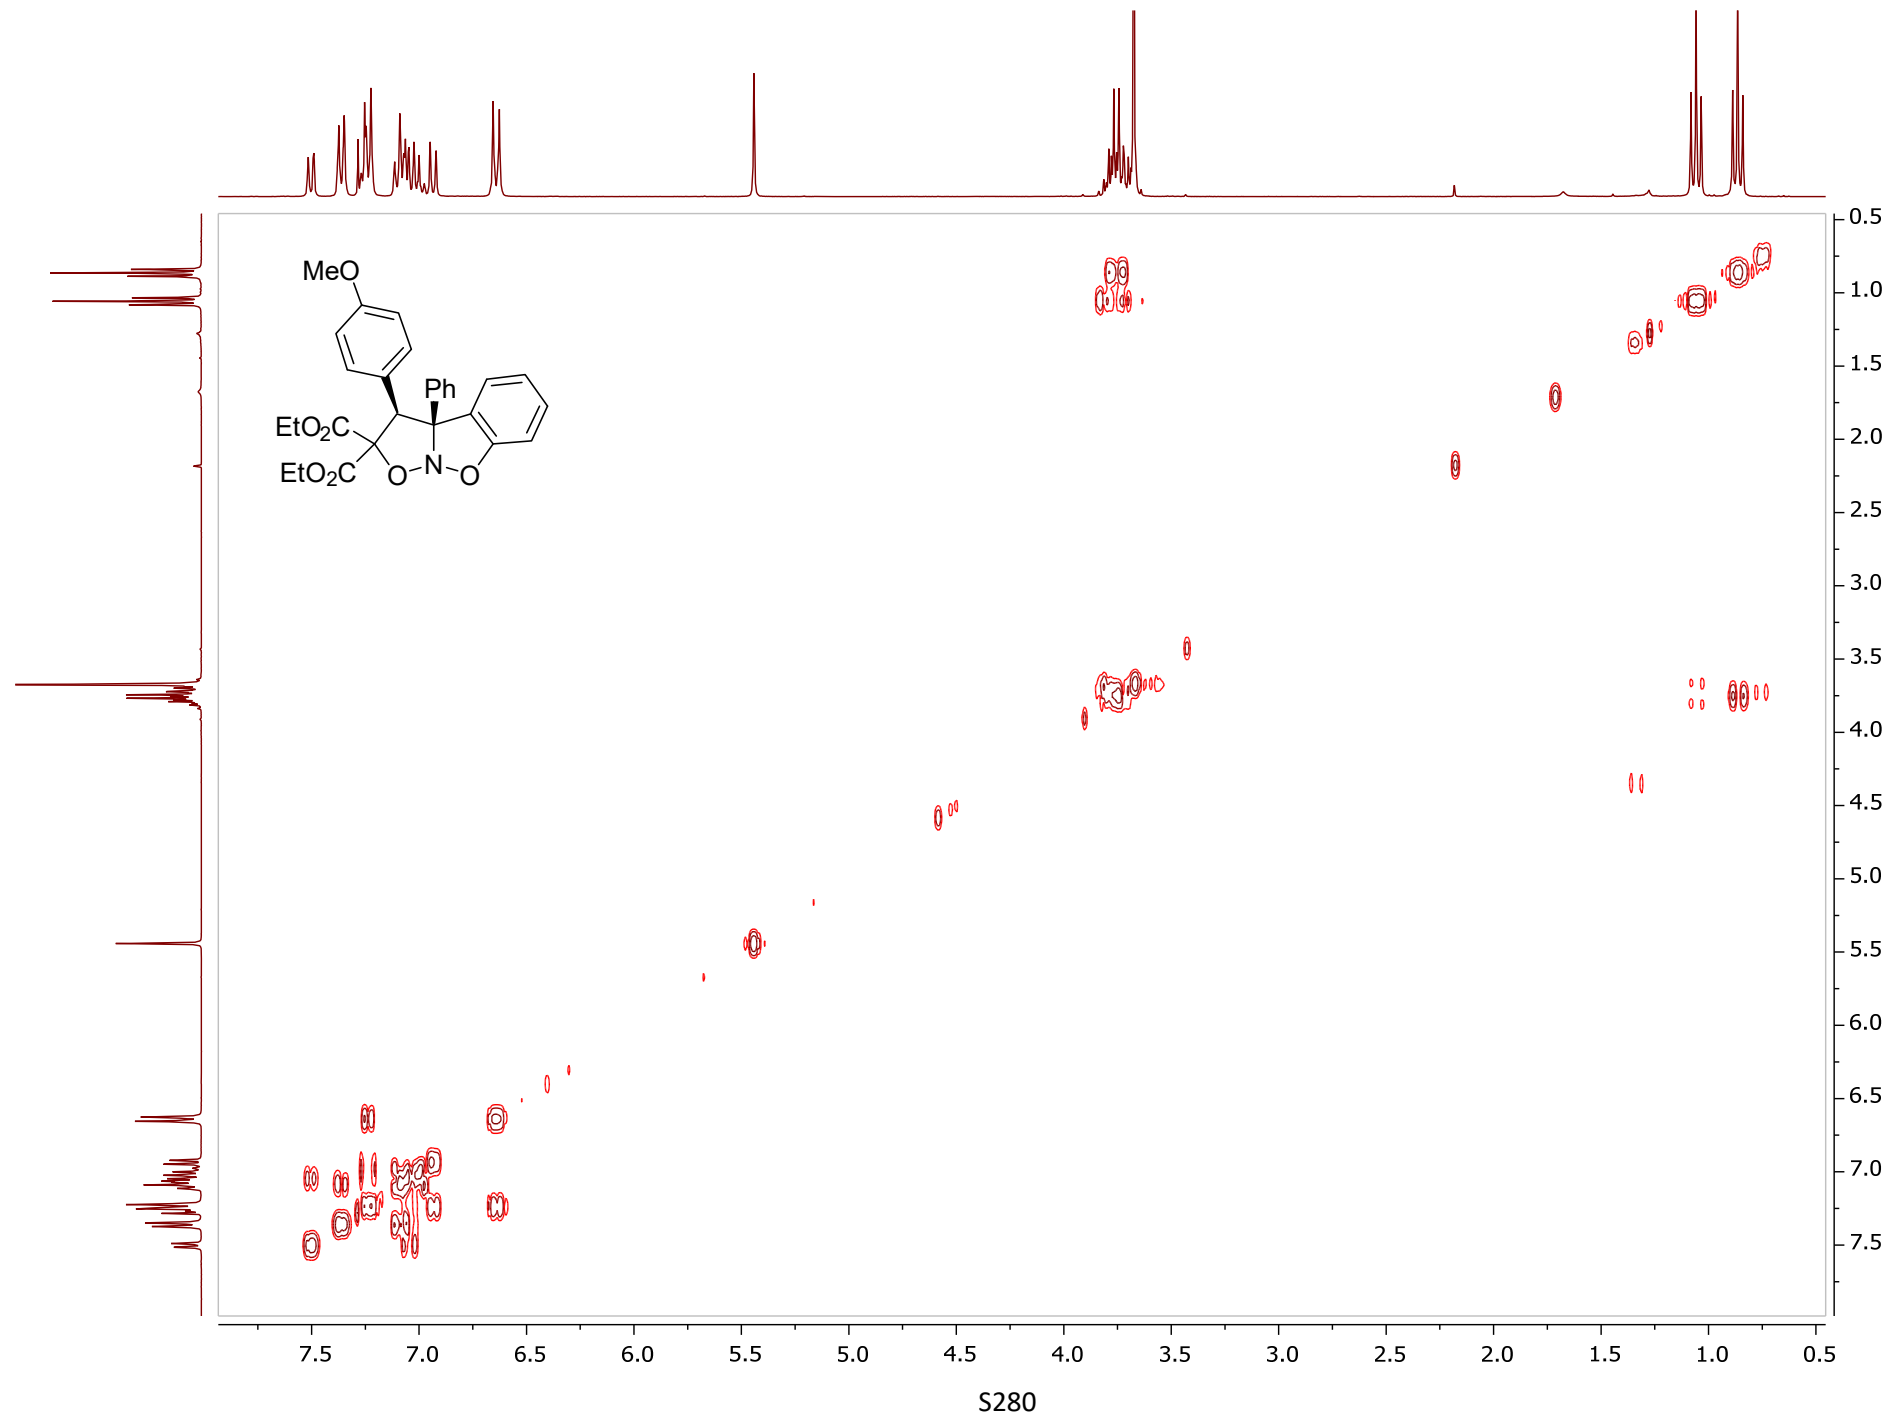



$^1\text{H}-^{13}\text{C}$  HSQC

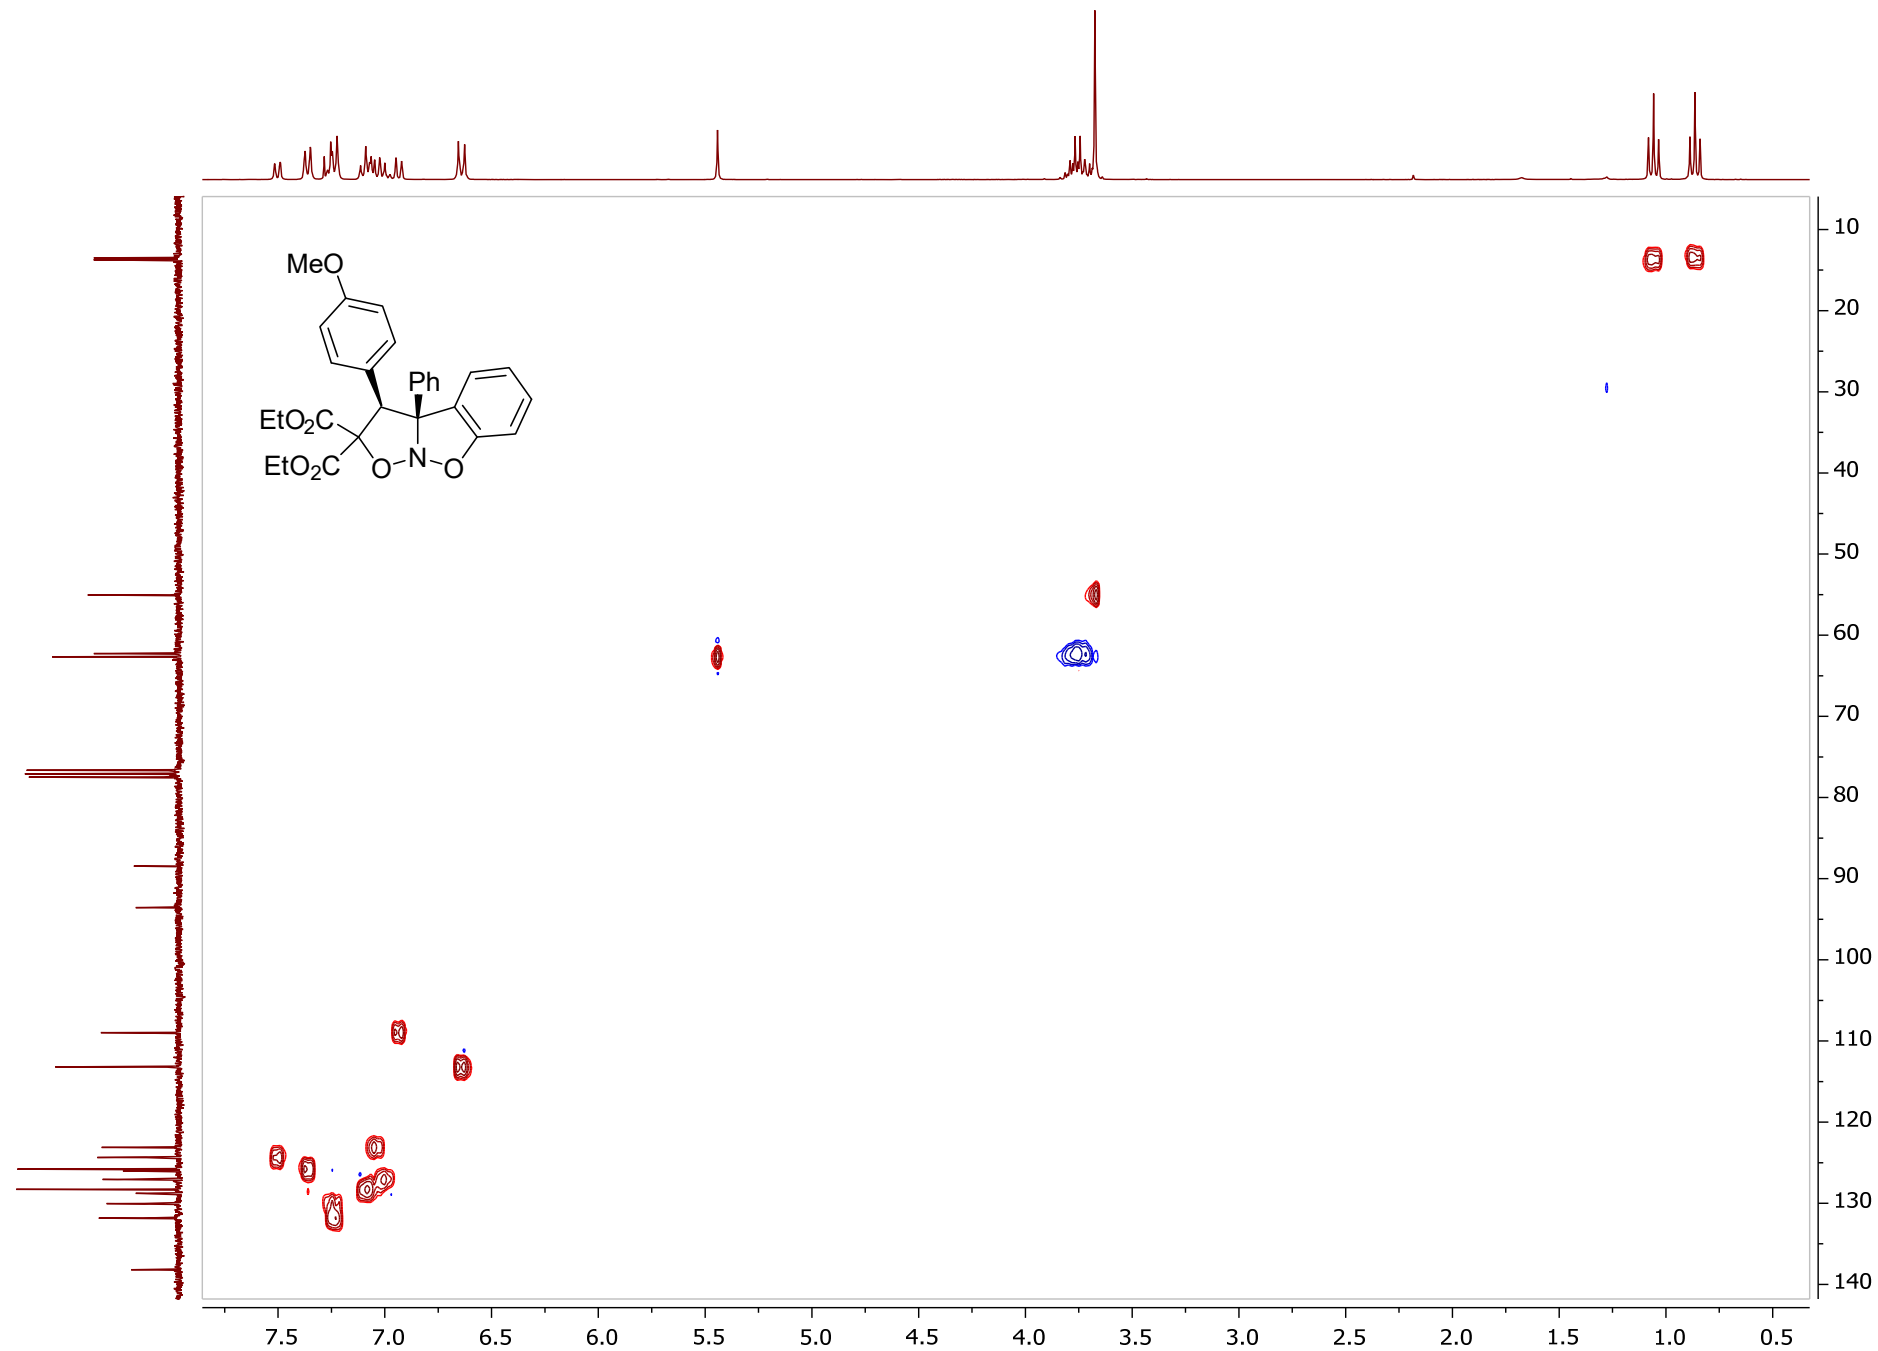

$^1\text{H}$ - $^{13}\text{C}$  HMBC

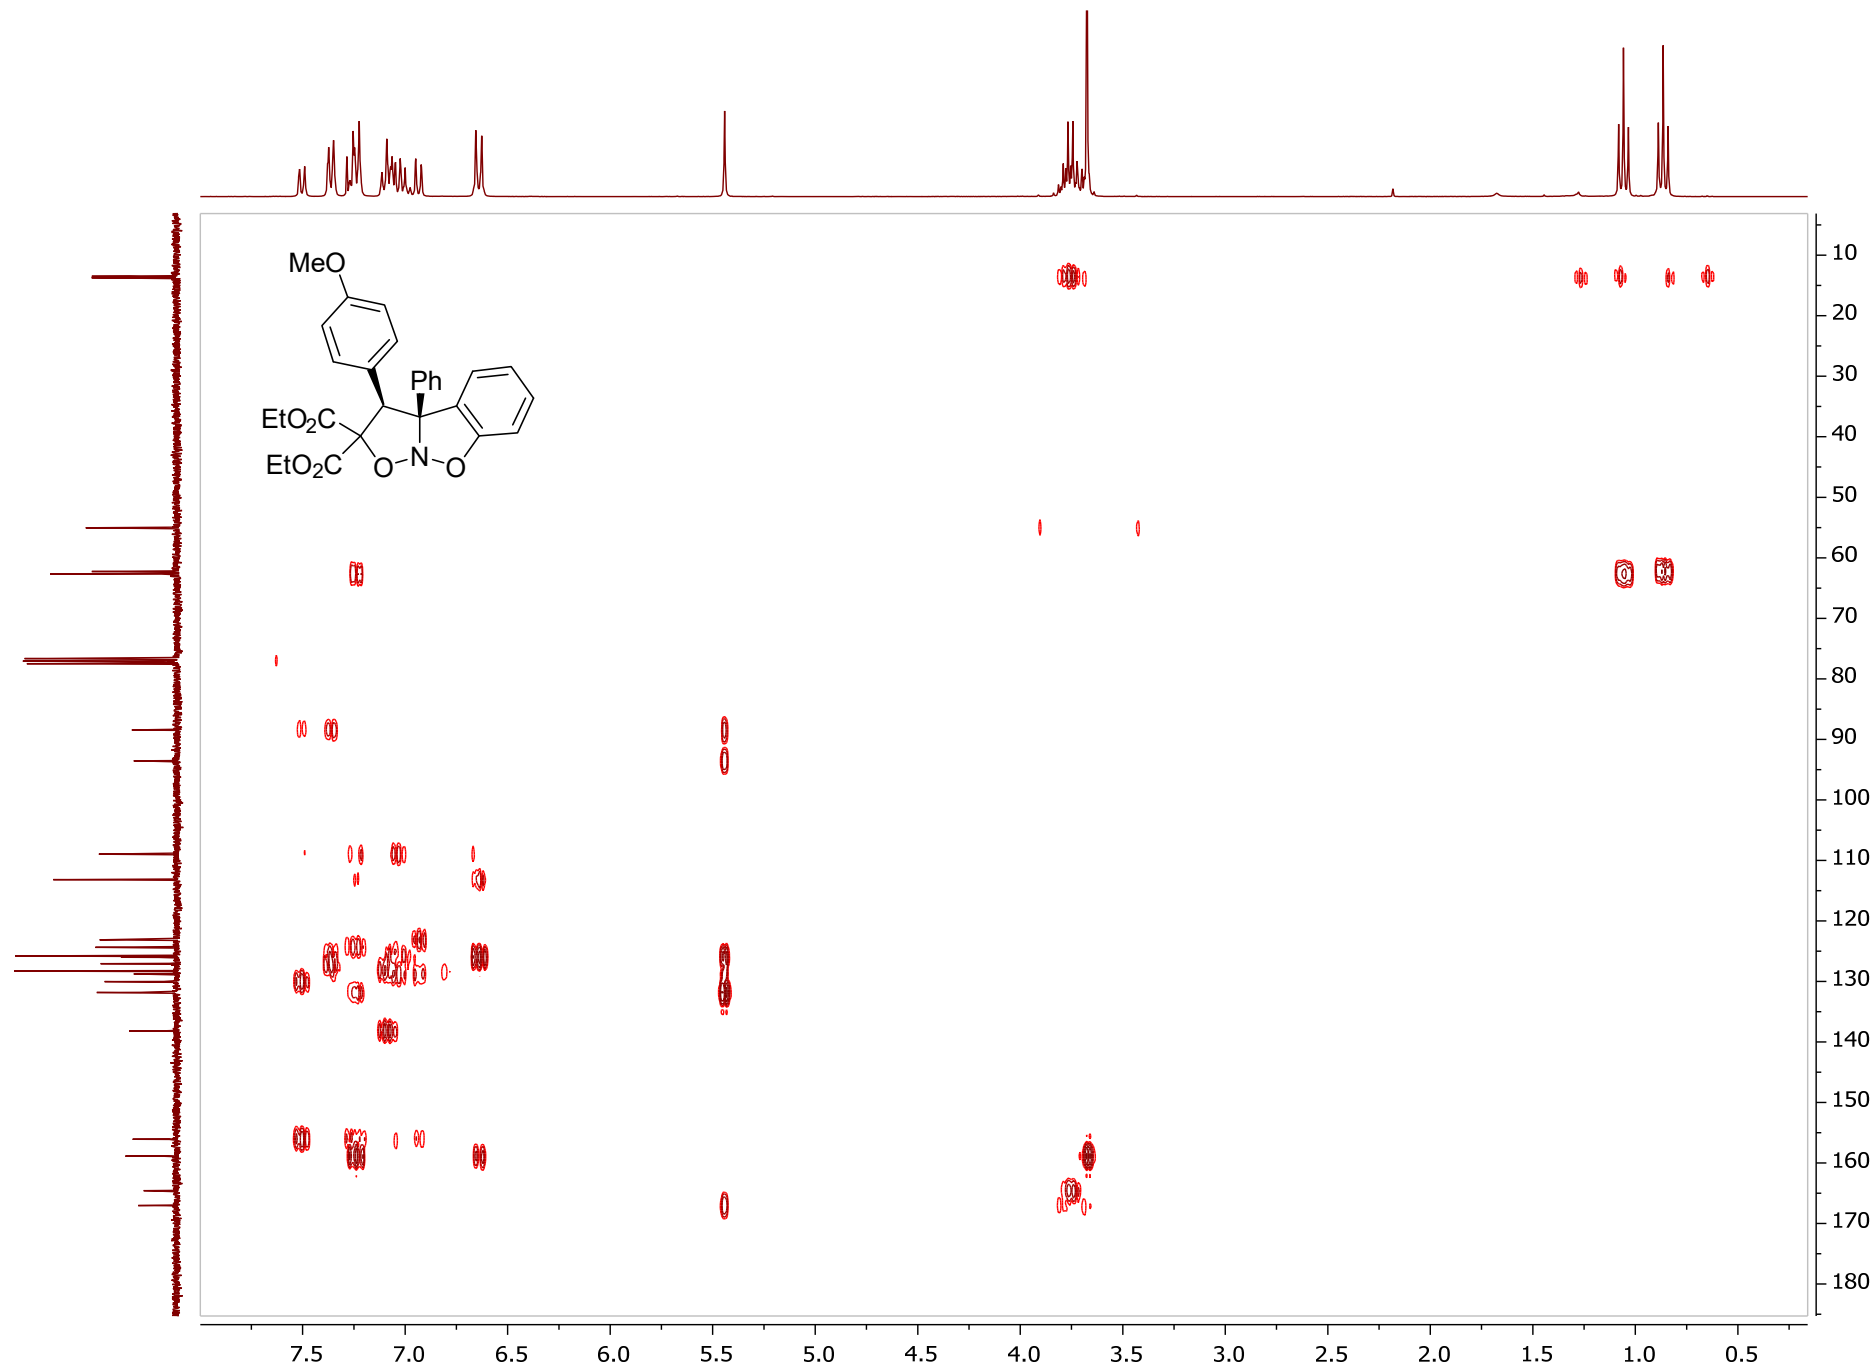

S282

$^1\text{H}$ - $^1\text{H}$  NOESY

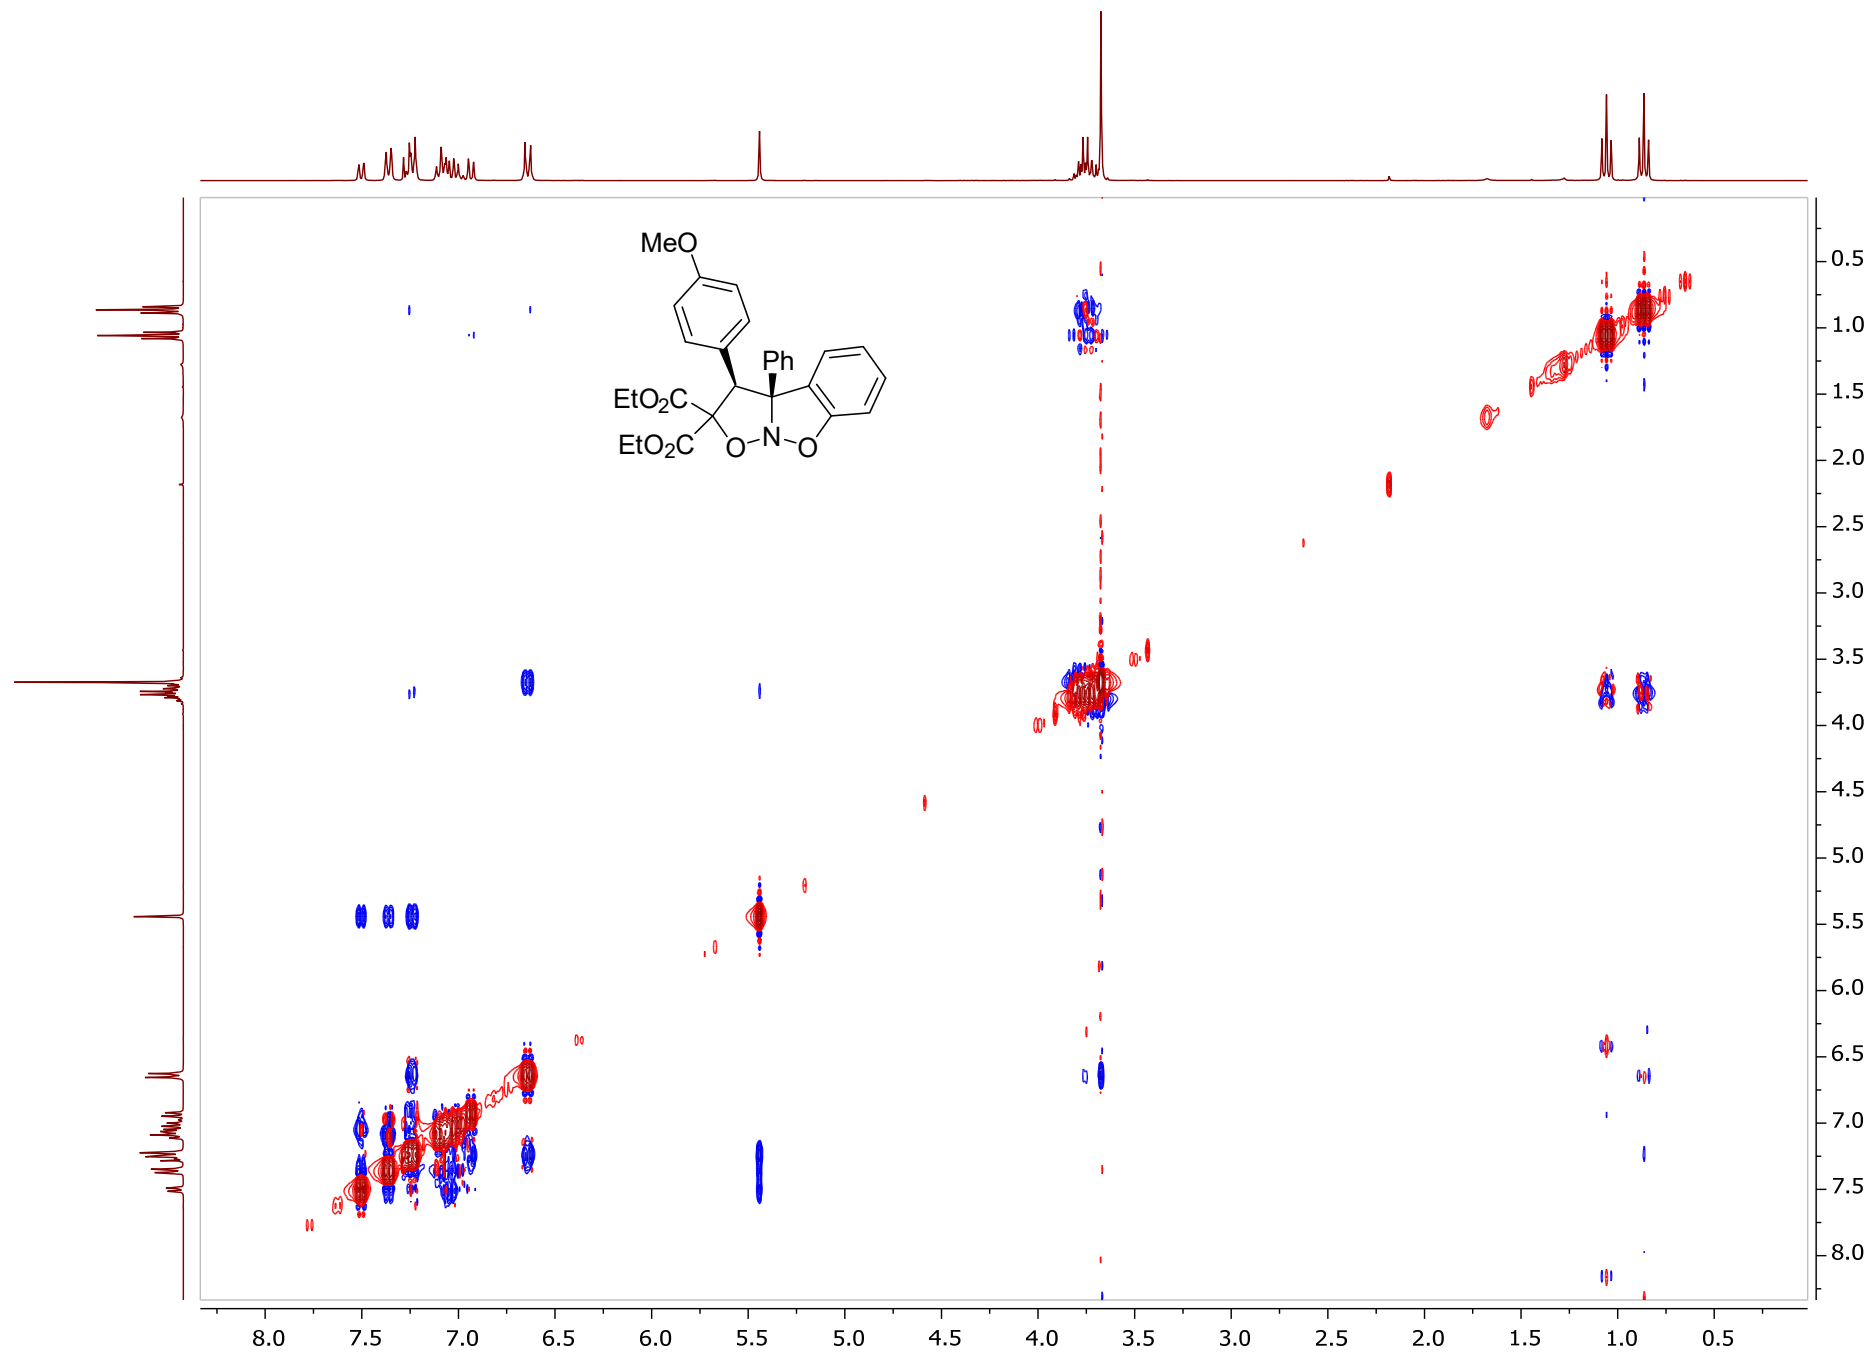

Diethyl (3*R*\*,3*aS*\*)-3a-chloro-3-(4-methoxyphenyl)-3,3a-dihydro-2*H*-benzo[d]isoxazolo[2,3-*b*]isoxazole-2,2-dicarboxylate 6da

<sup>1</sup>H NMR (300 MHz, CDCl<sub>3</sub>)

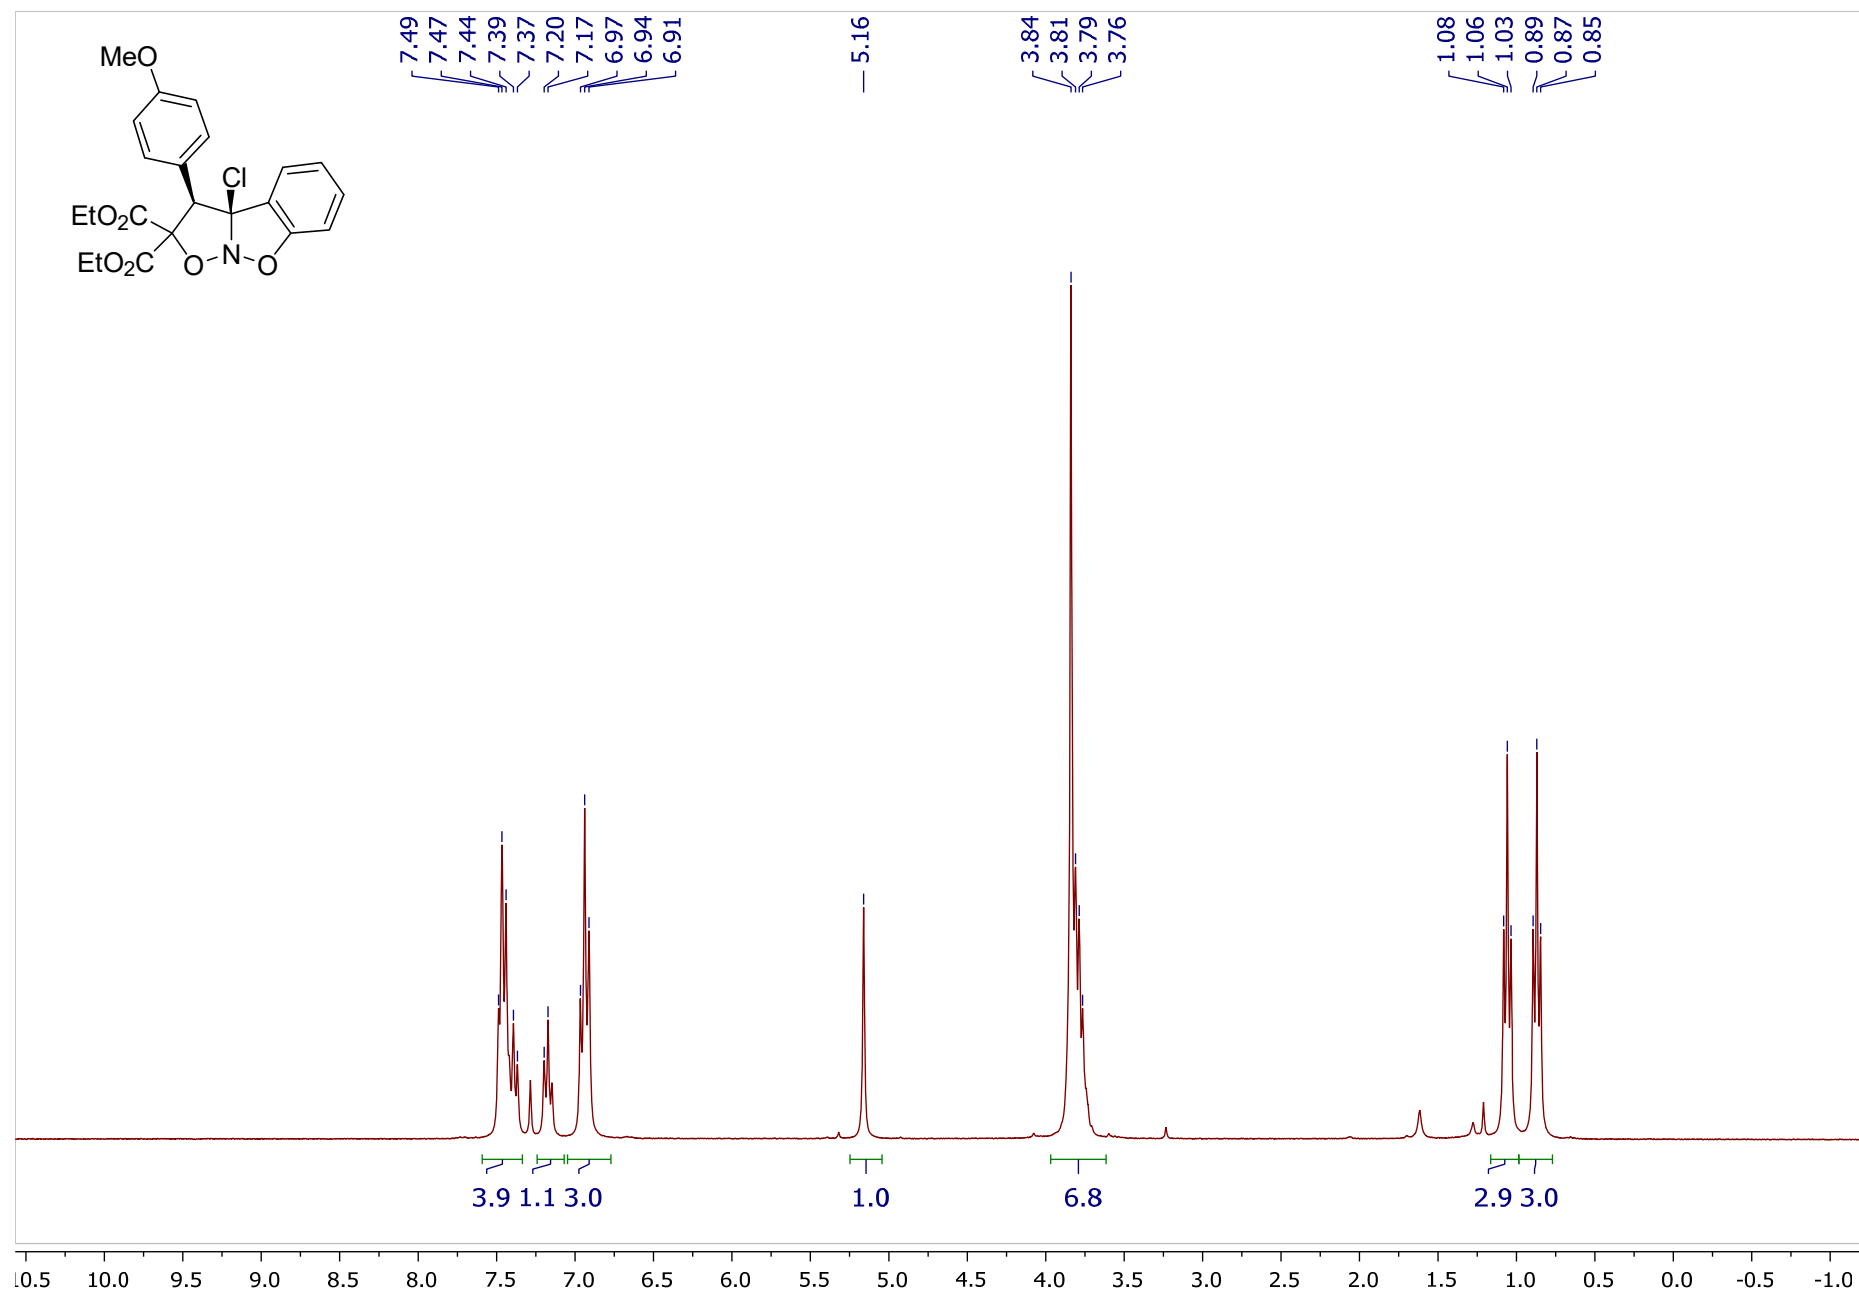

<sup>13</sup>C NMR (75 MHz, CDCl<sub>3</sub>)

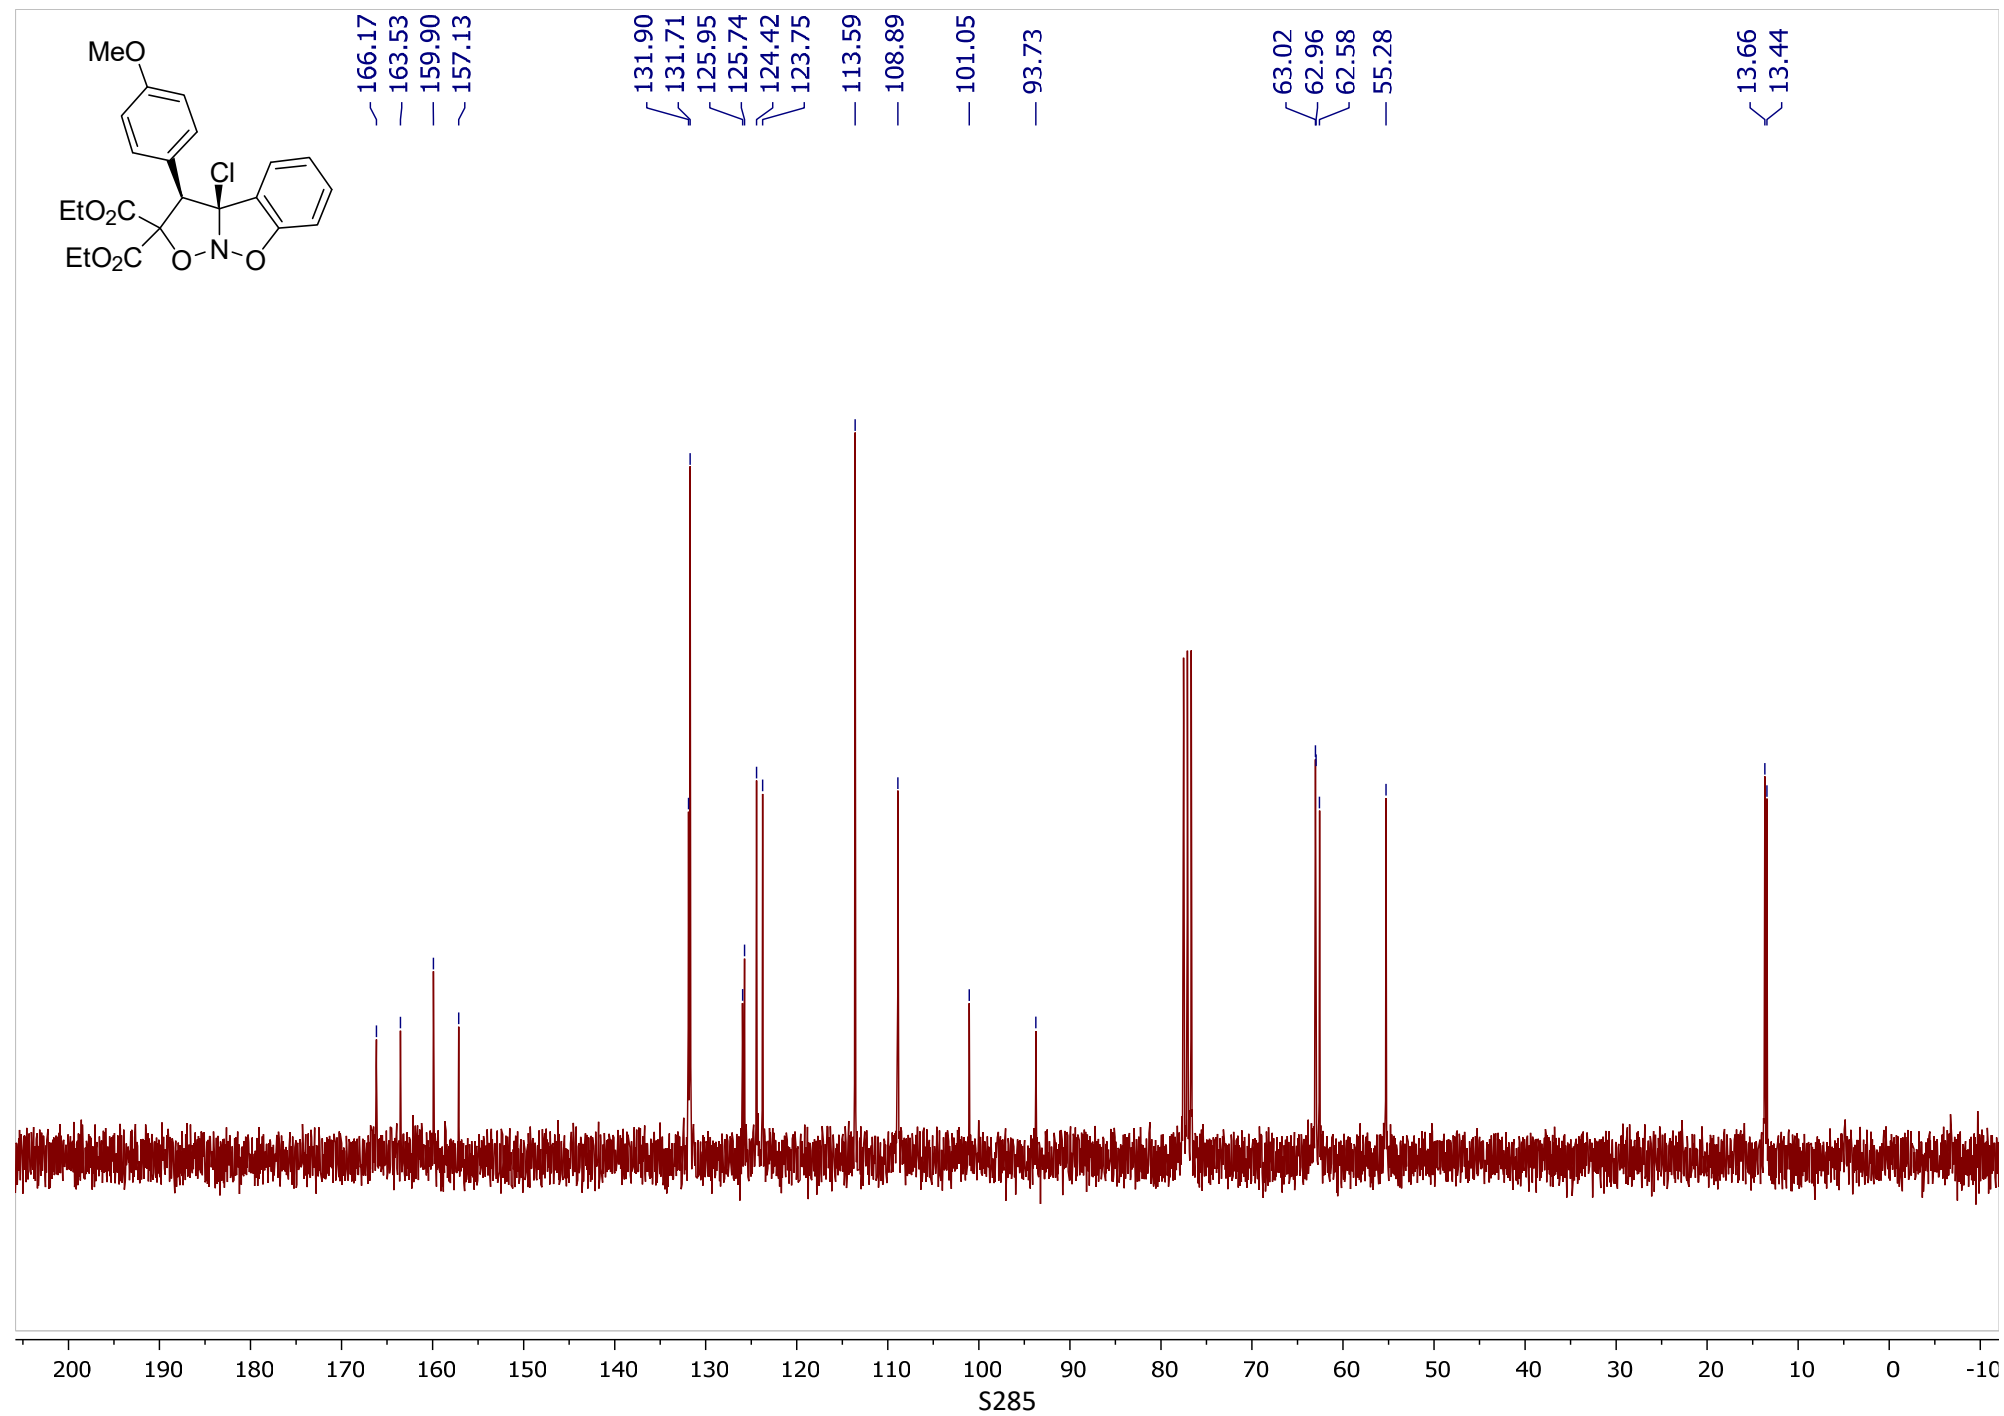

$^{13}\text{C}$  DEPT 135 (75 MHz,  $\text{CDCl}_3$ )

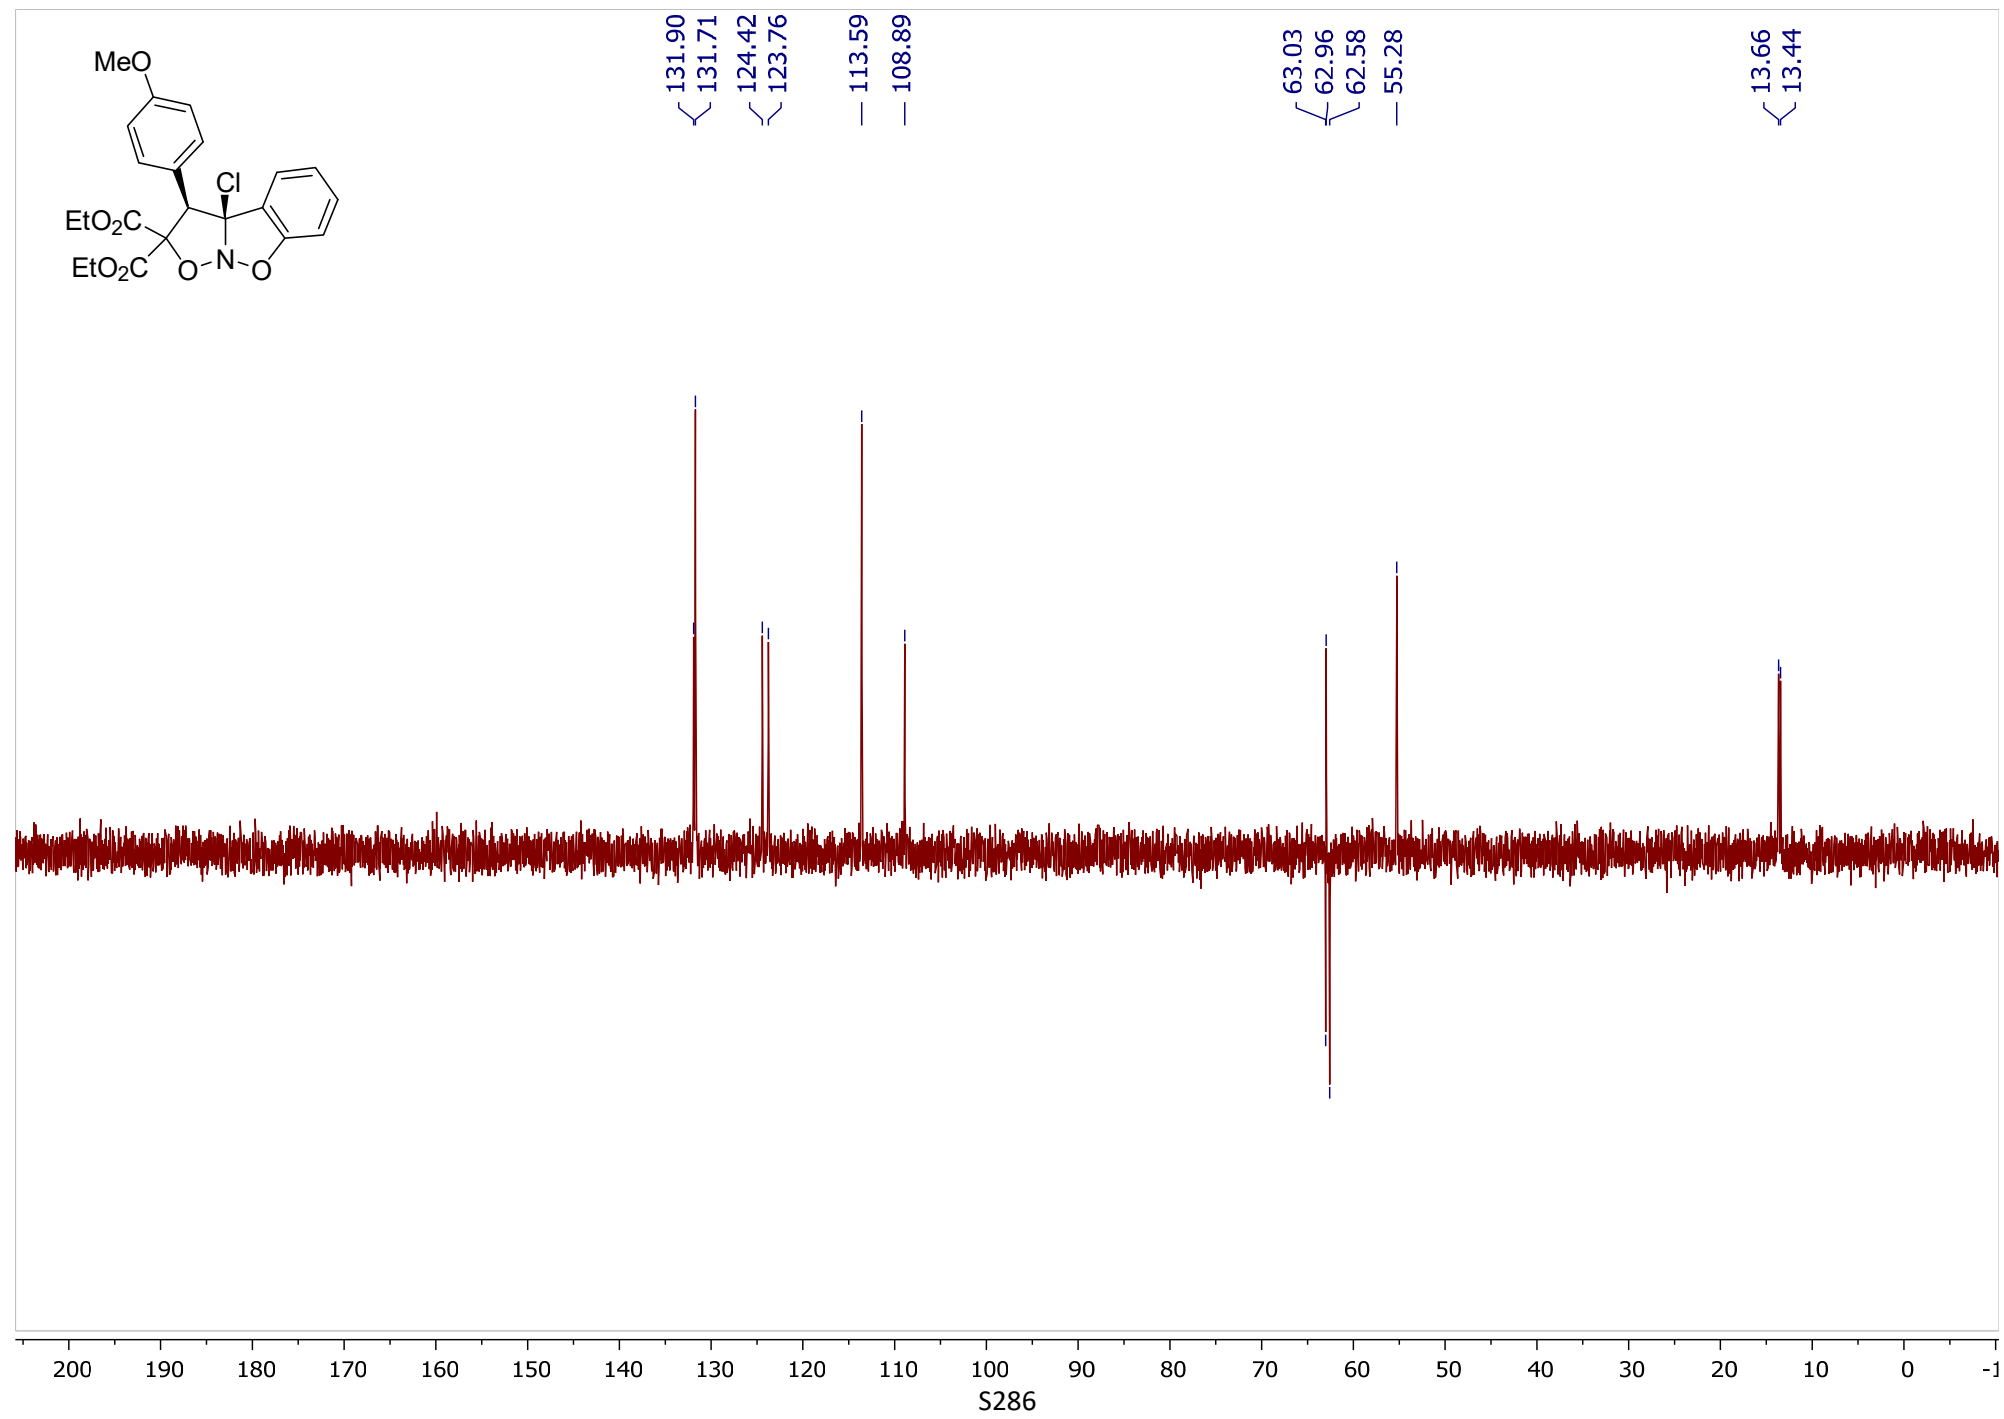

Diethyl (4aR\*,12bS\*)-2,3,4,4a-tetrahydrobenzo[c]benzo[4,5]isoxazolo[2,3-b]isoxazole-5,5(1H)-dicarboxylate 6ea

$^1\text{H}$  NMR (300 MHz,  $\text{CDCl}_3$ )

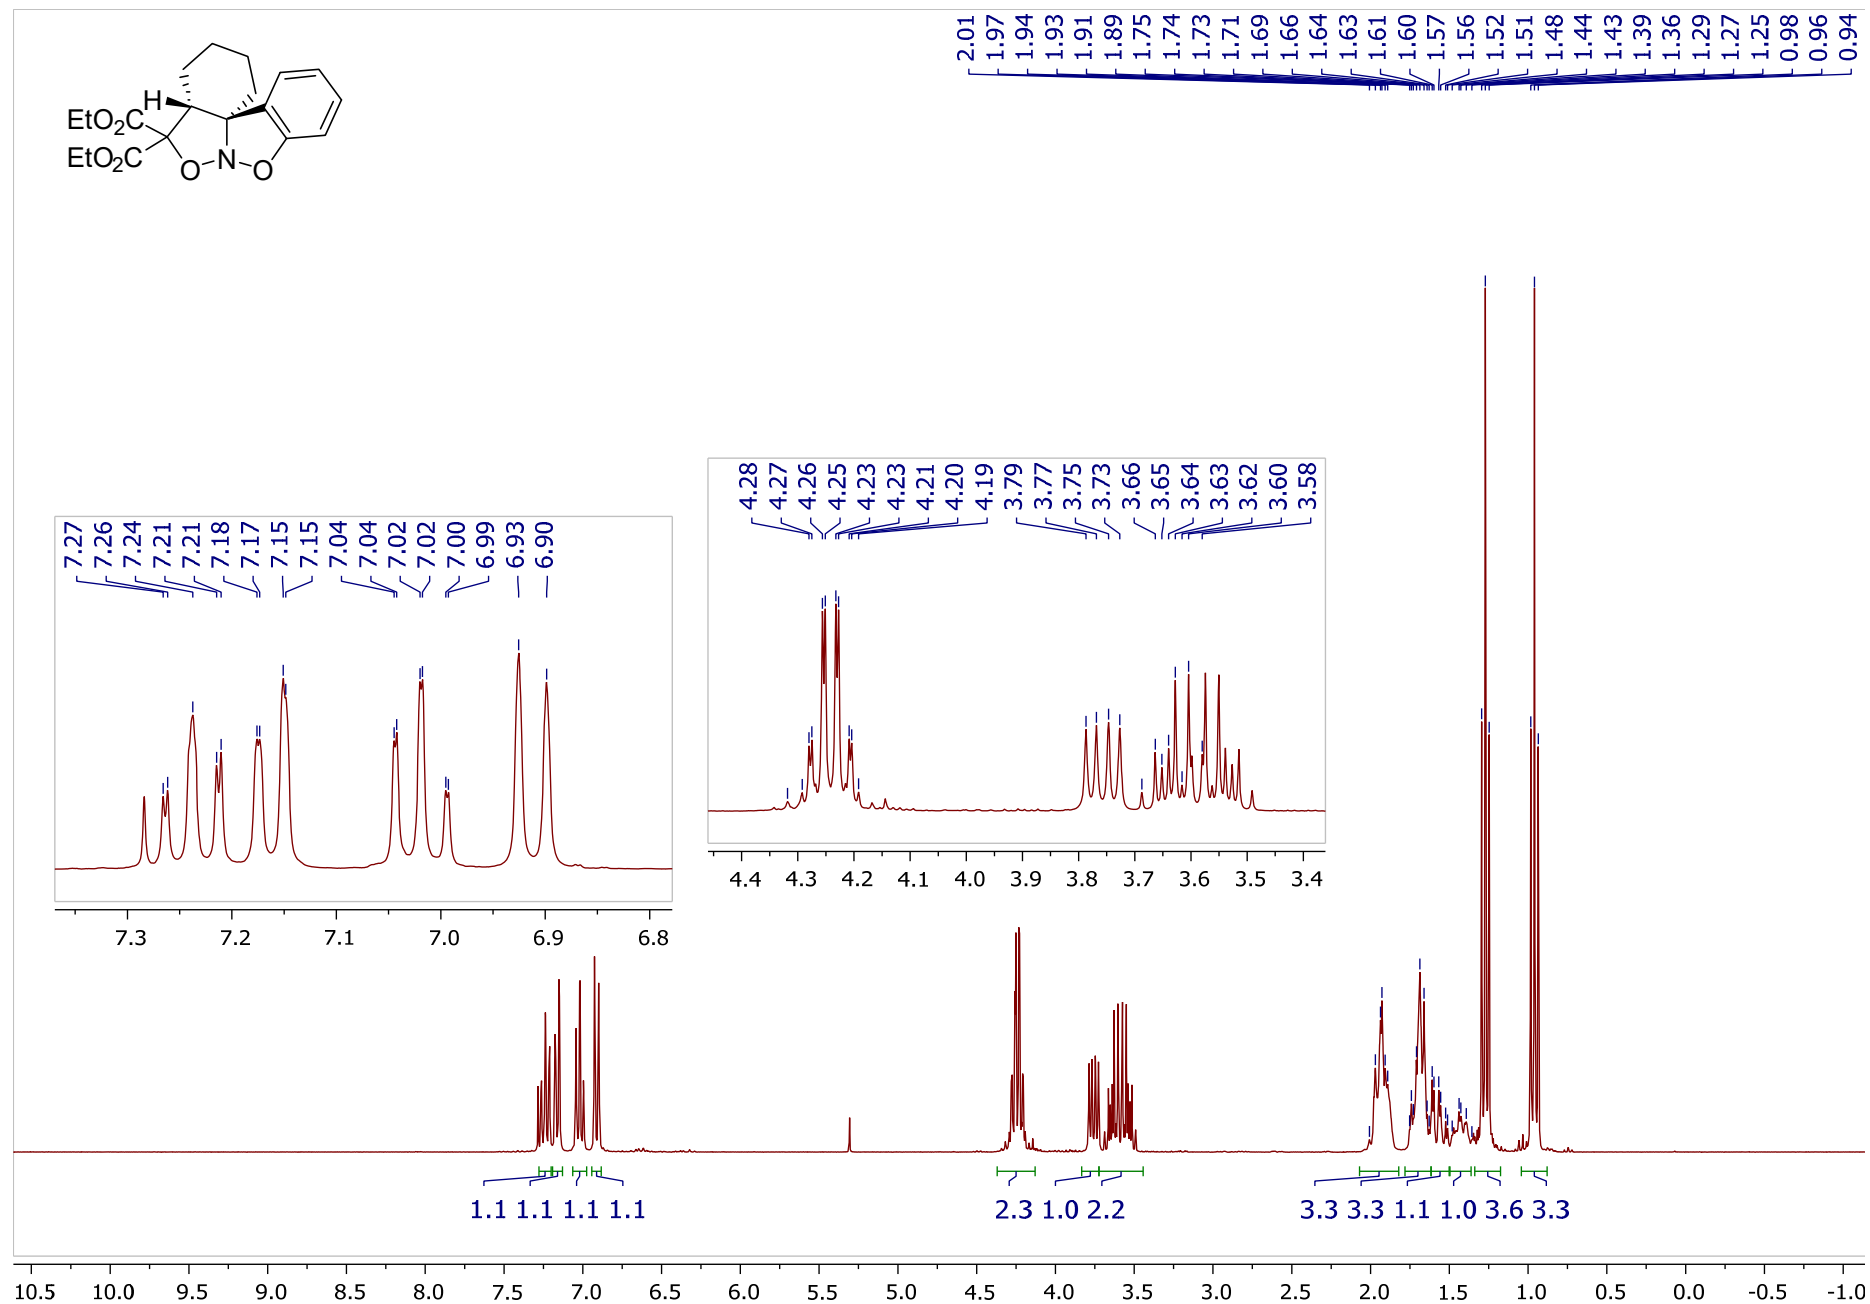

<sup>13</sup>C NMR (75 MHz, CDCl<sub>3</sub>)

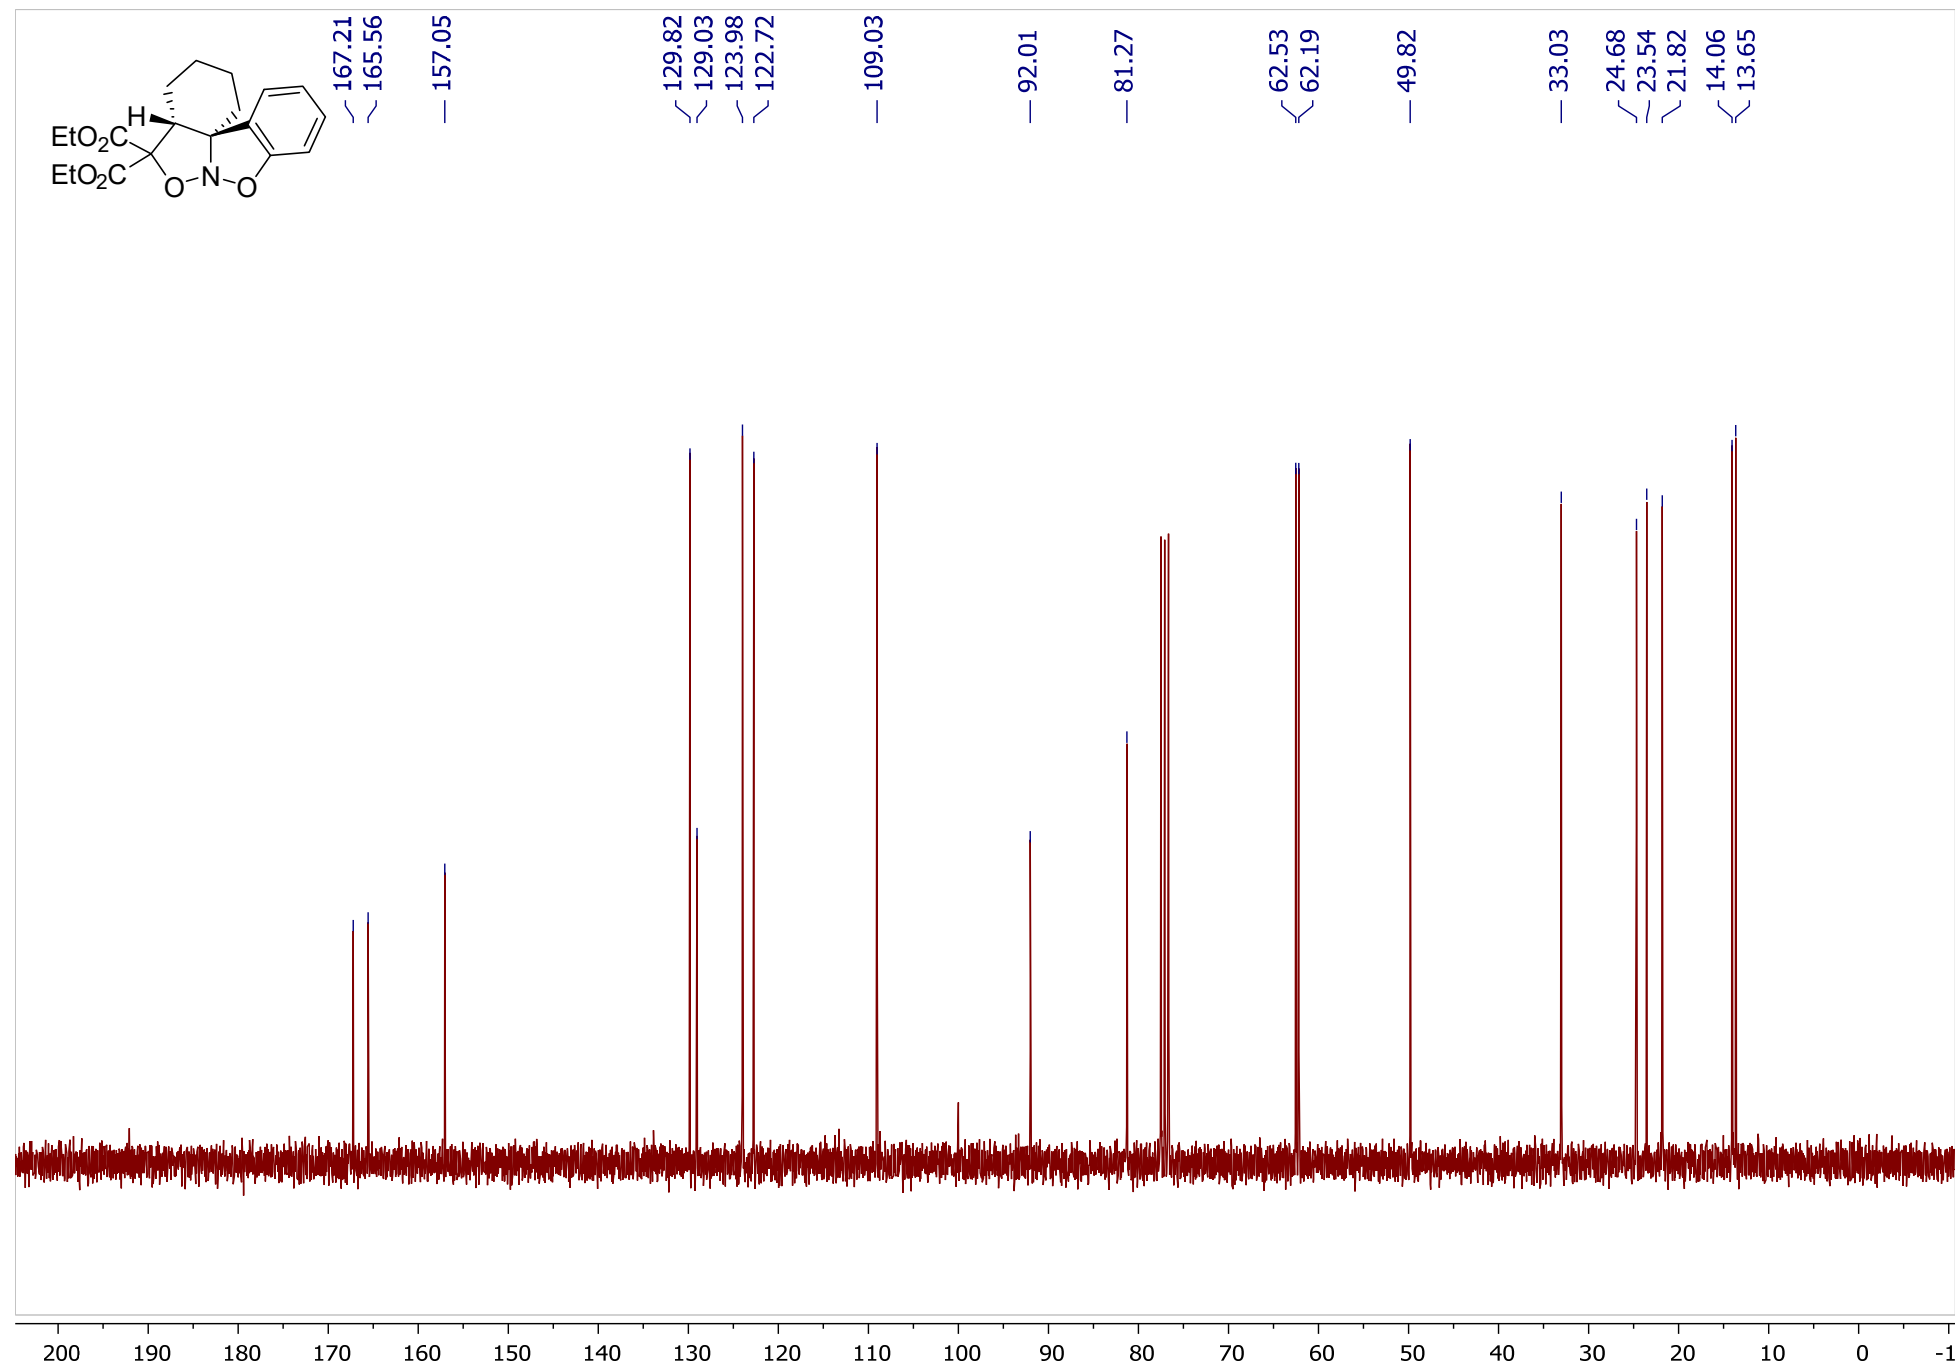





$^1\text{H}$ - $^1\text{H}$  COSY

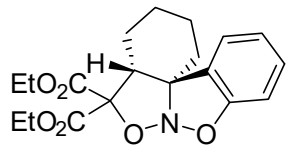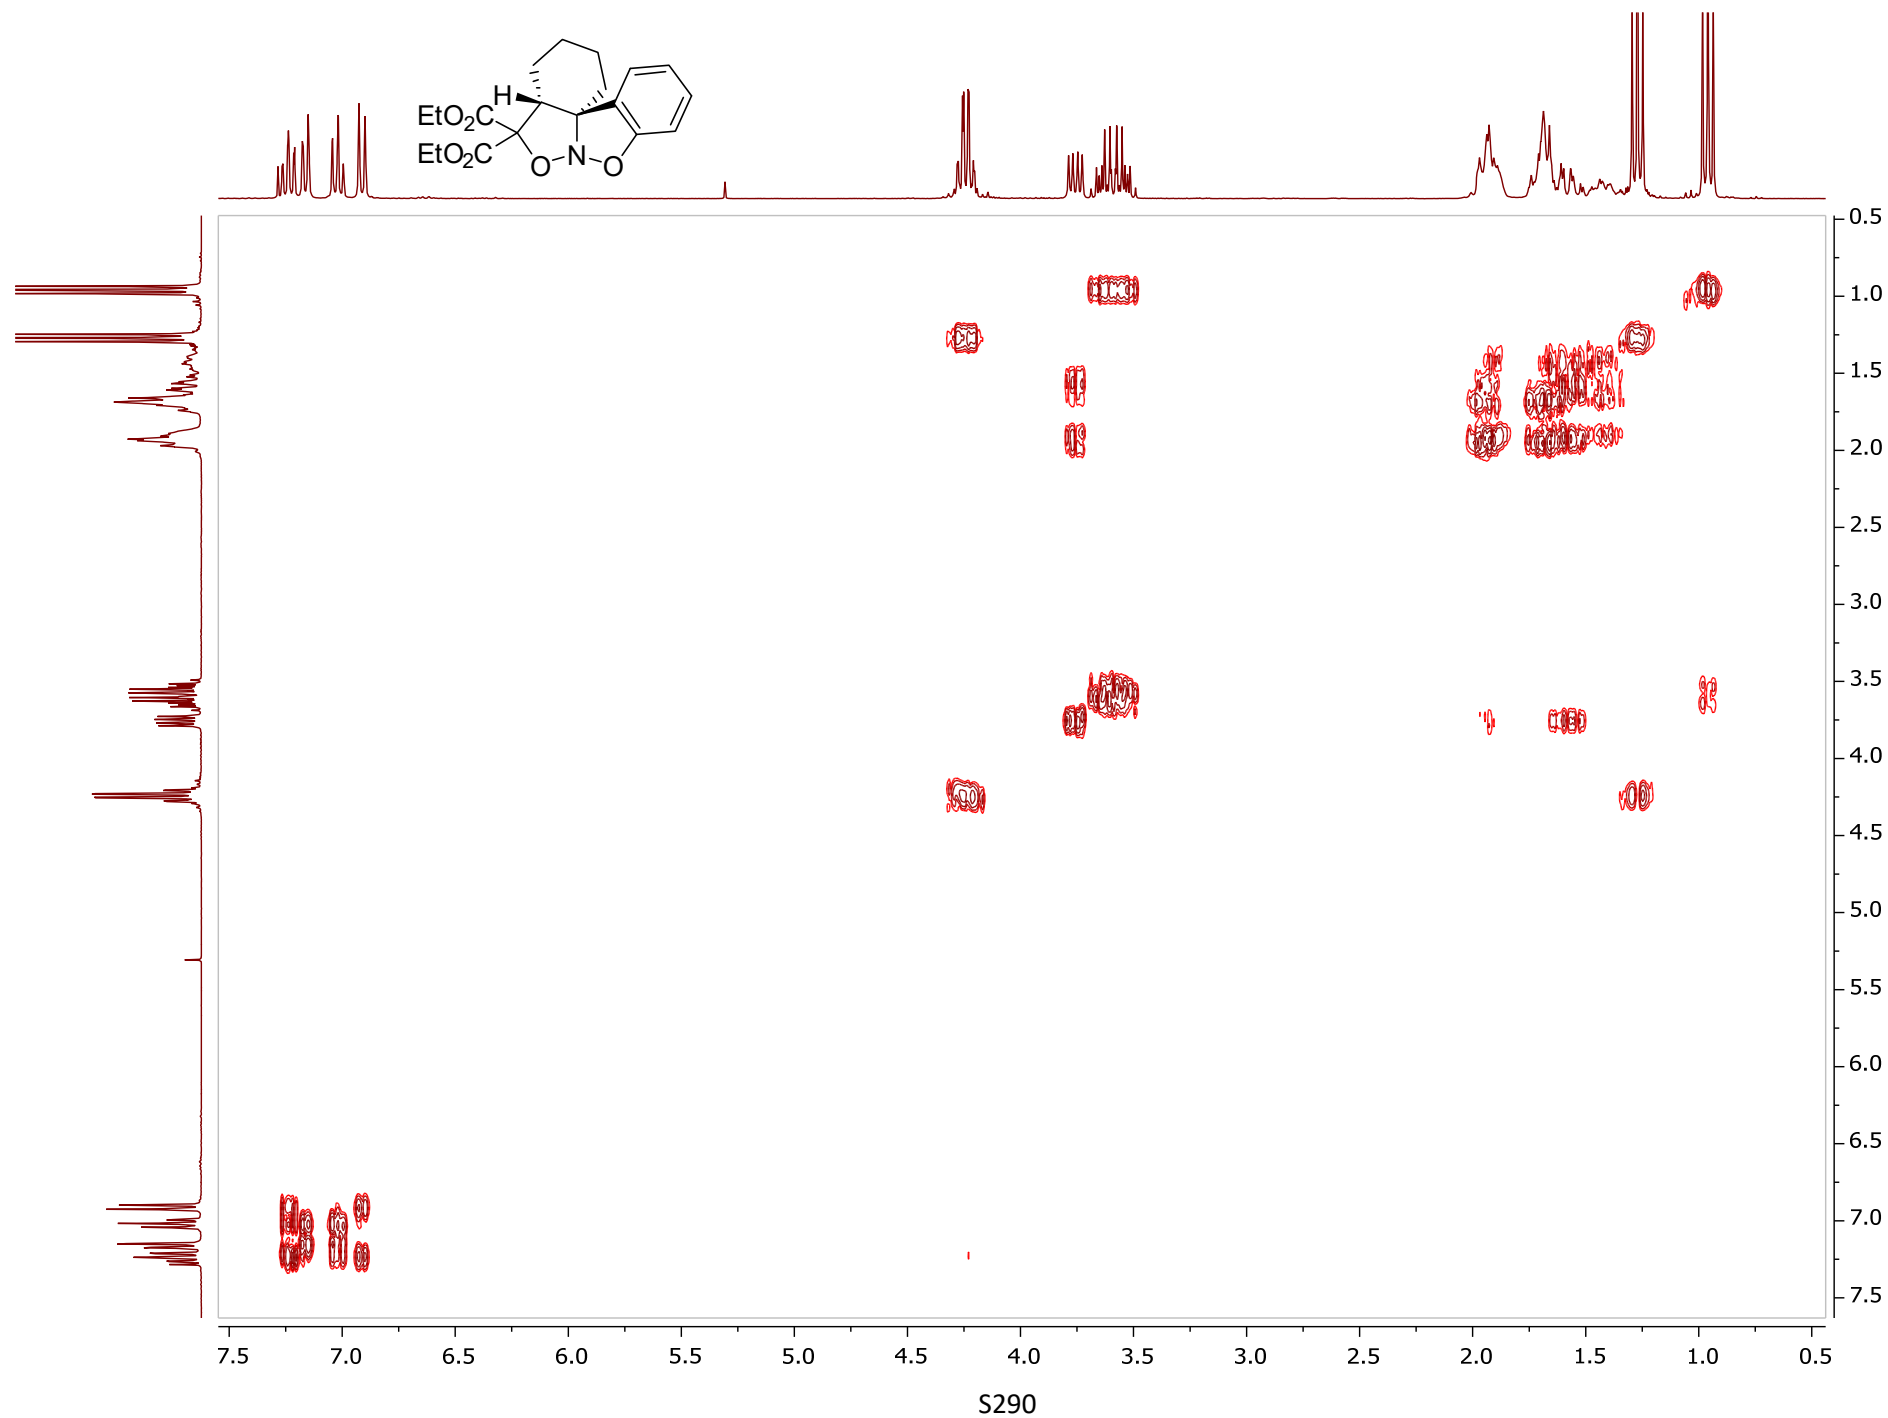

$^1\text{H}$ - $^{13}\text{C}$  HSQC

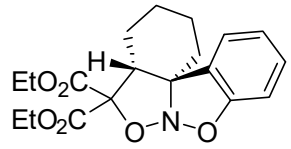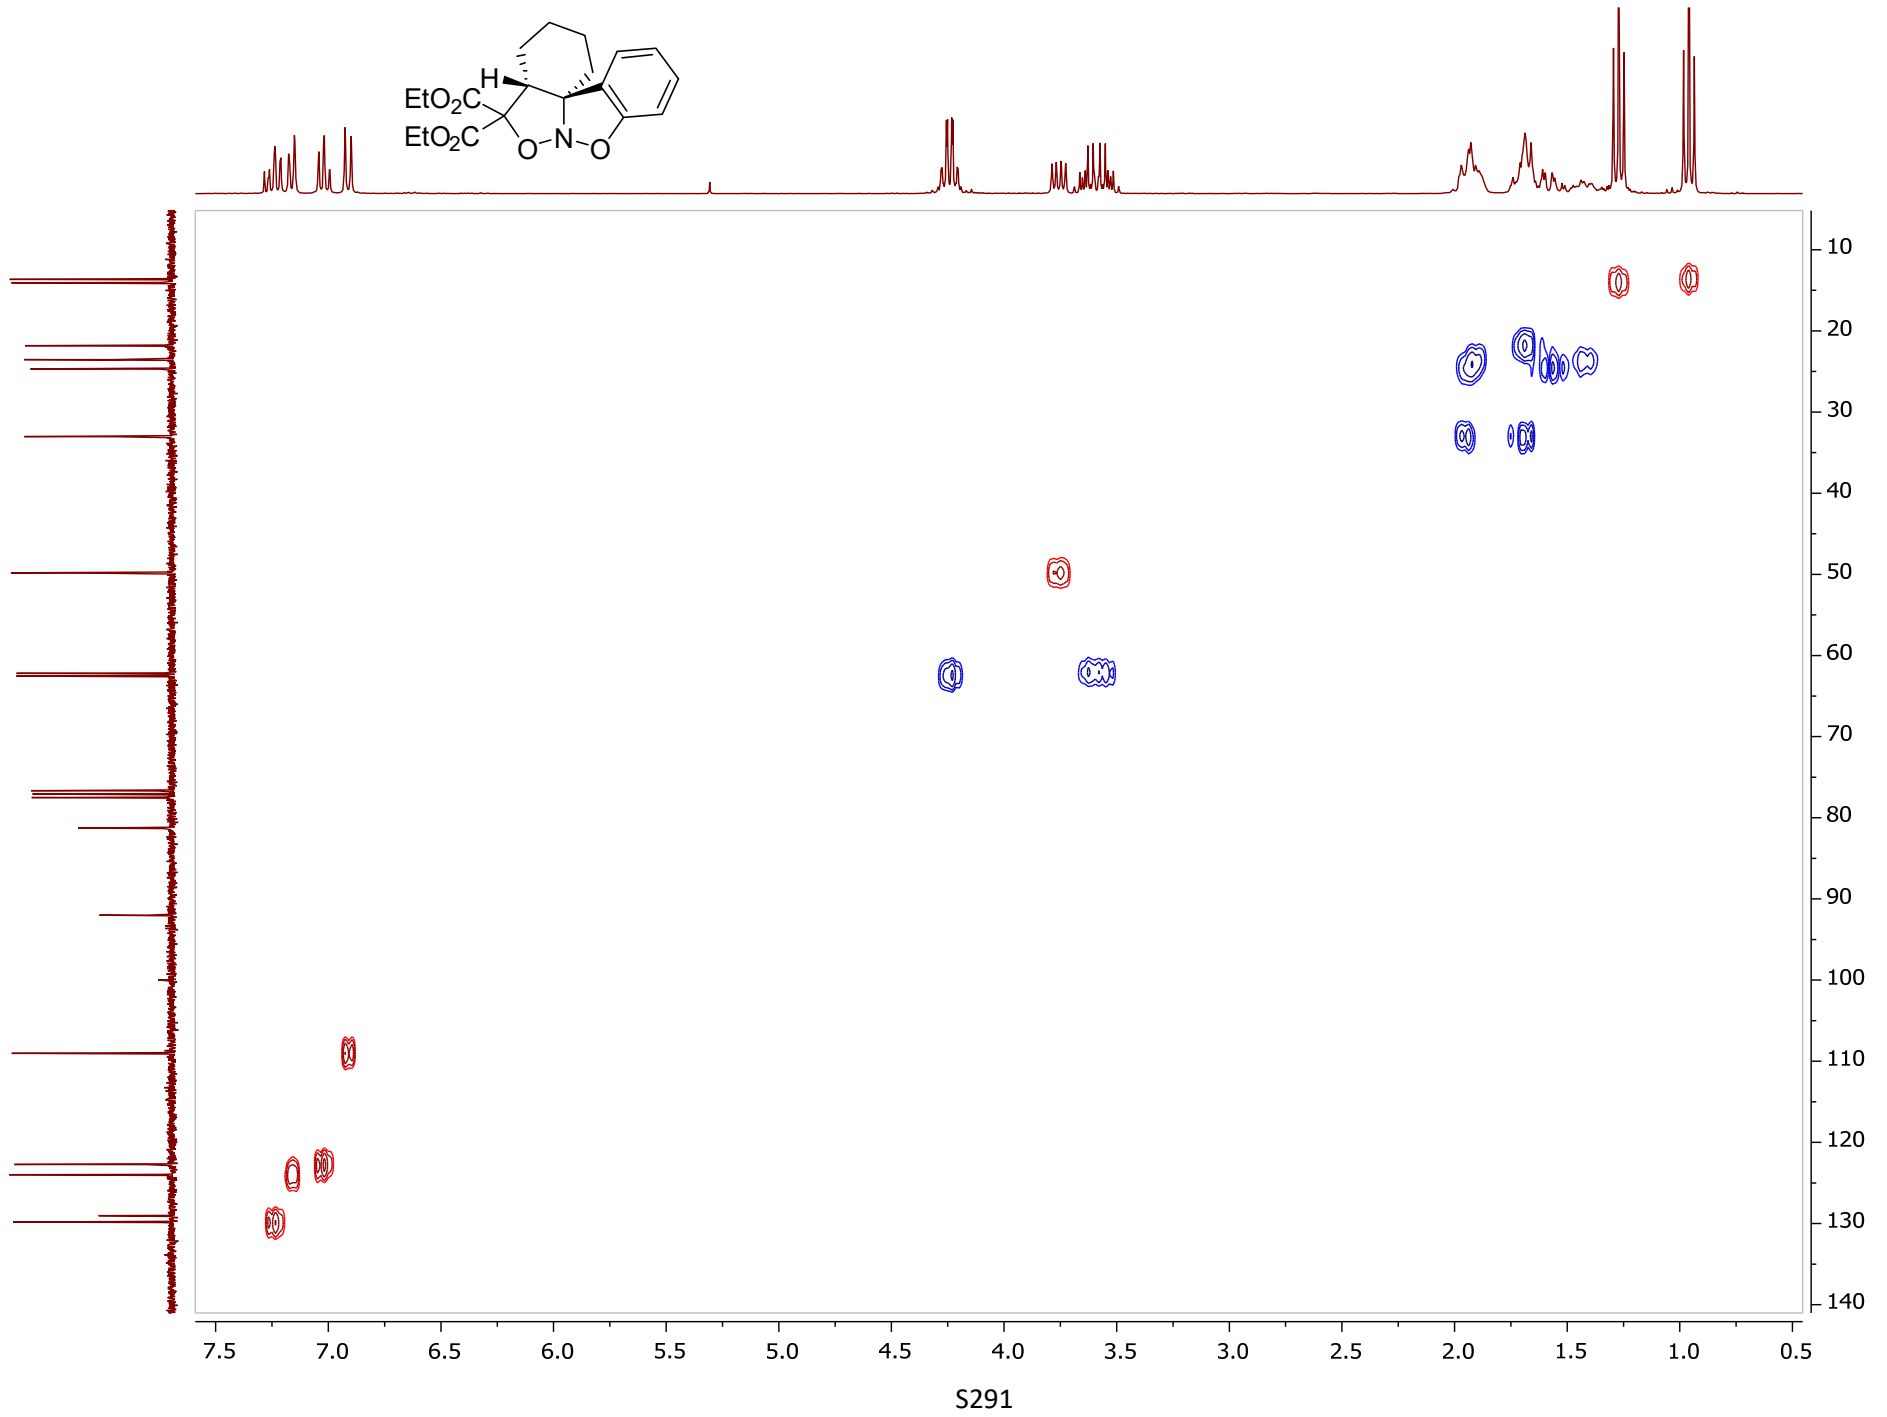

$^1\text{H}$ - $^{13}\text{C}$  HMBC

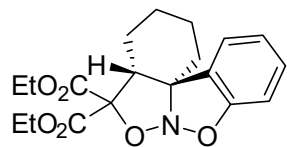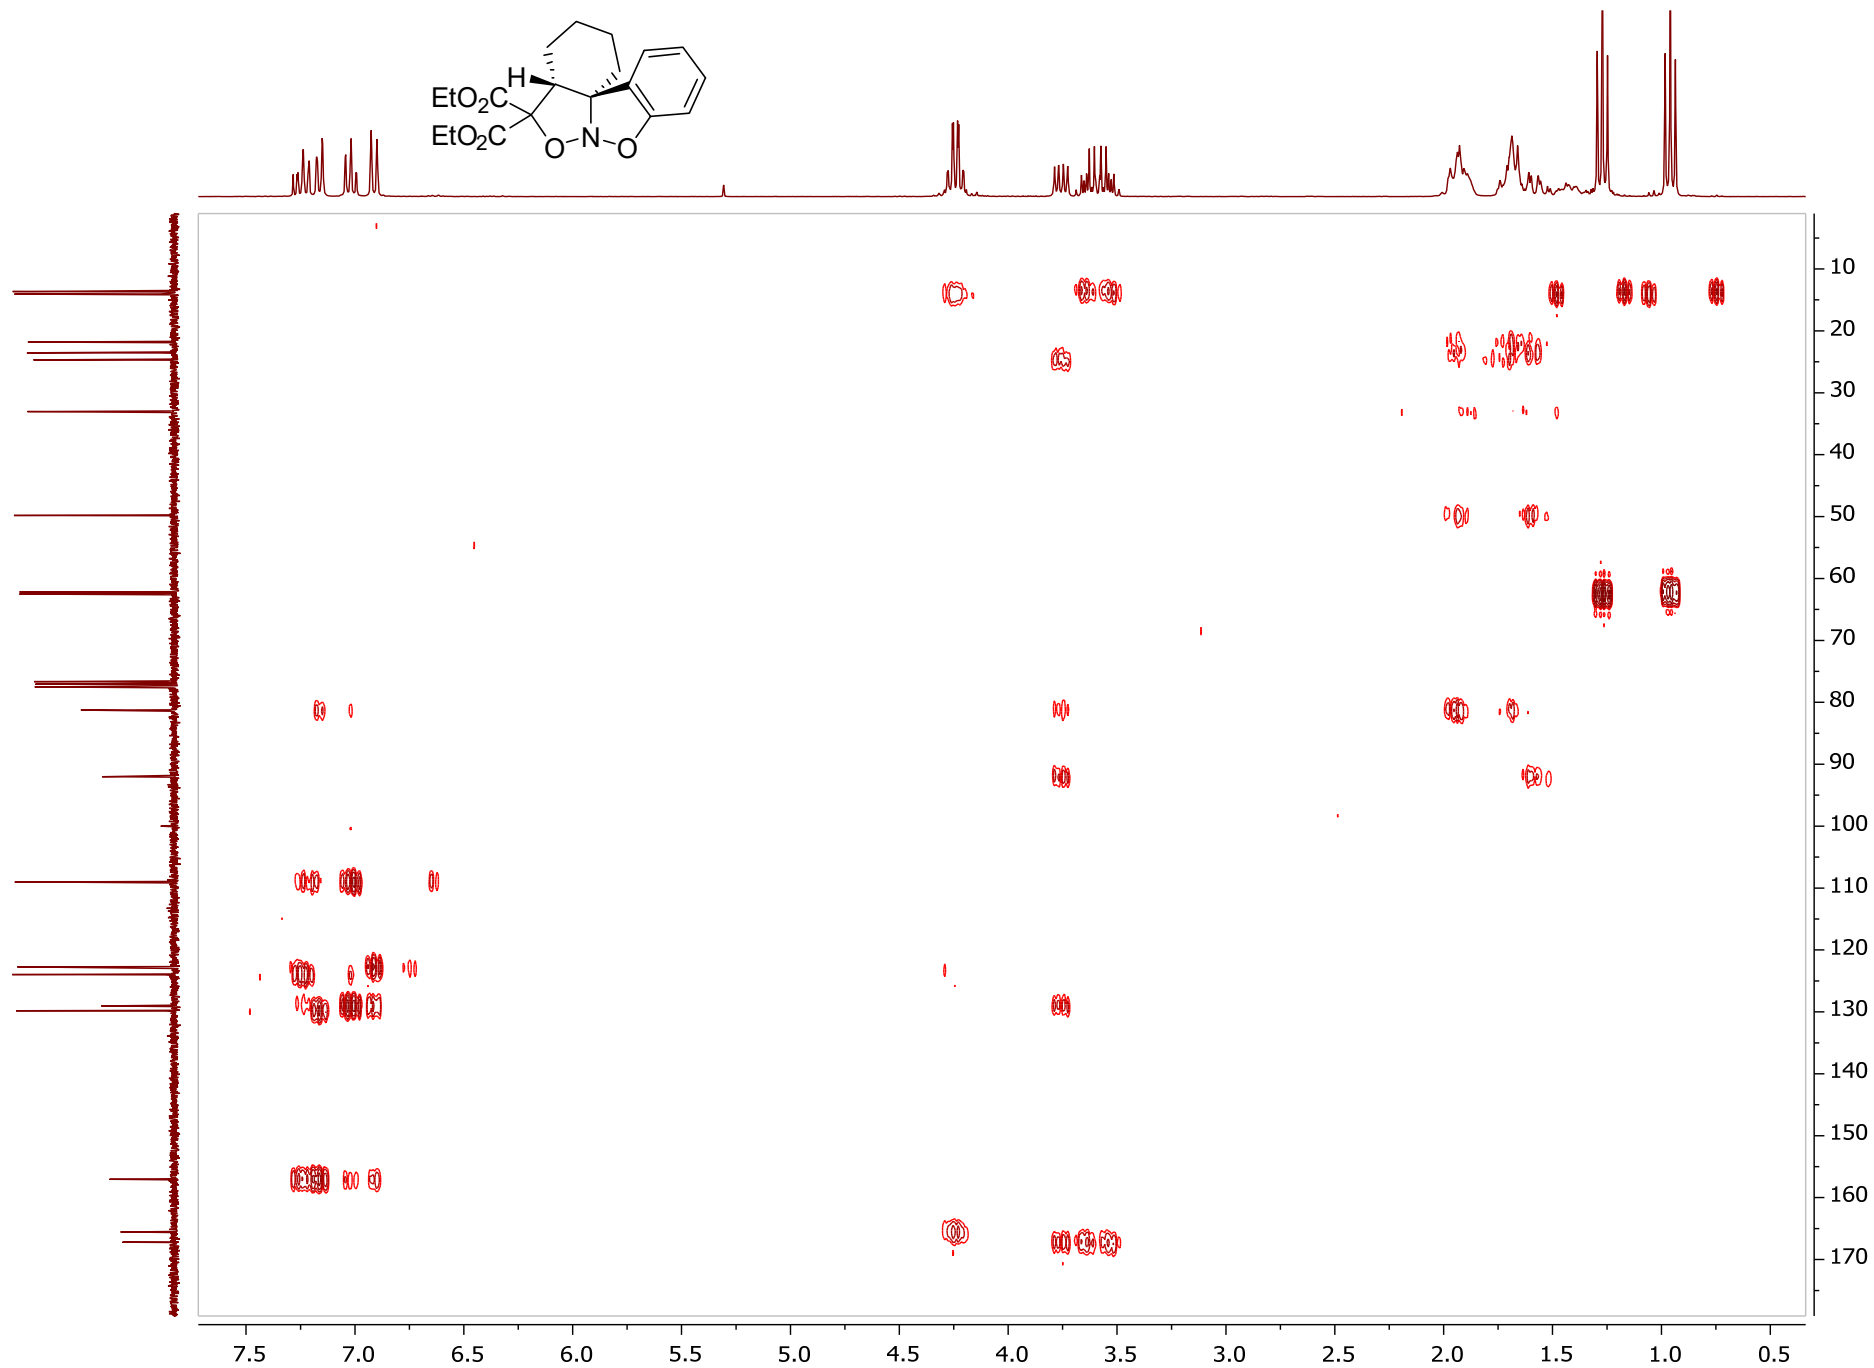

S292

$^1\text{H}$ - $^1\text{H}$  NOESY

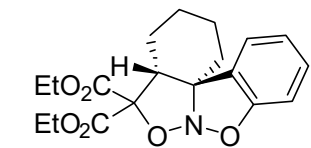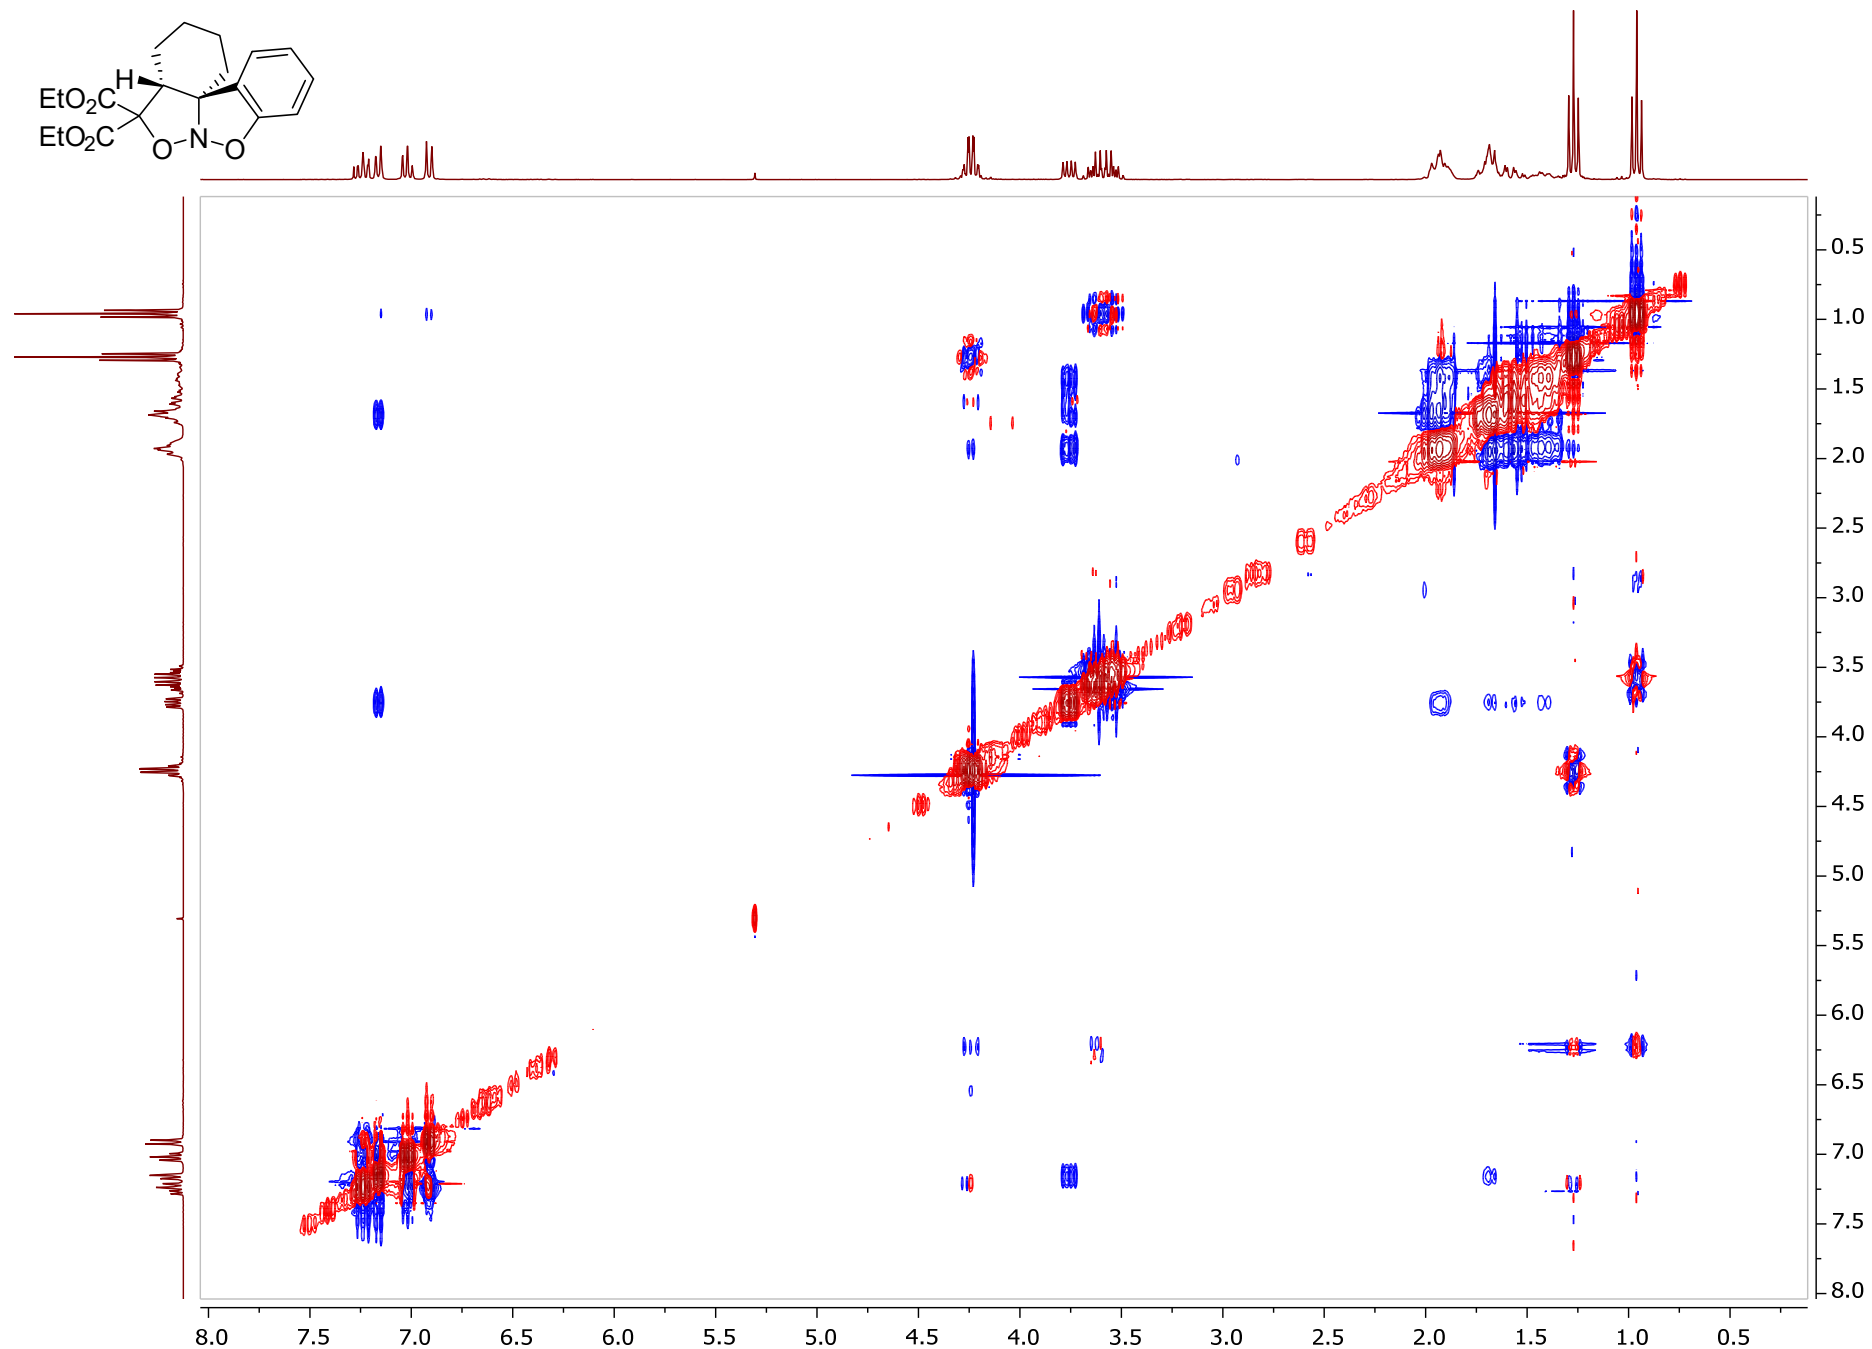

**(3*S*\*,3*aS*\*)-3-(4-Methoxyphenyl)-3*a*-methyl-3,3*a*-dihydro-2*H*-benzo[*d*]isoxazolo[2,3-*b*]isoxazole 6fa**

<sup>1</sup>H NMR (300 MHz, CDCl<sub>3</sub>)

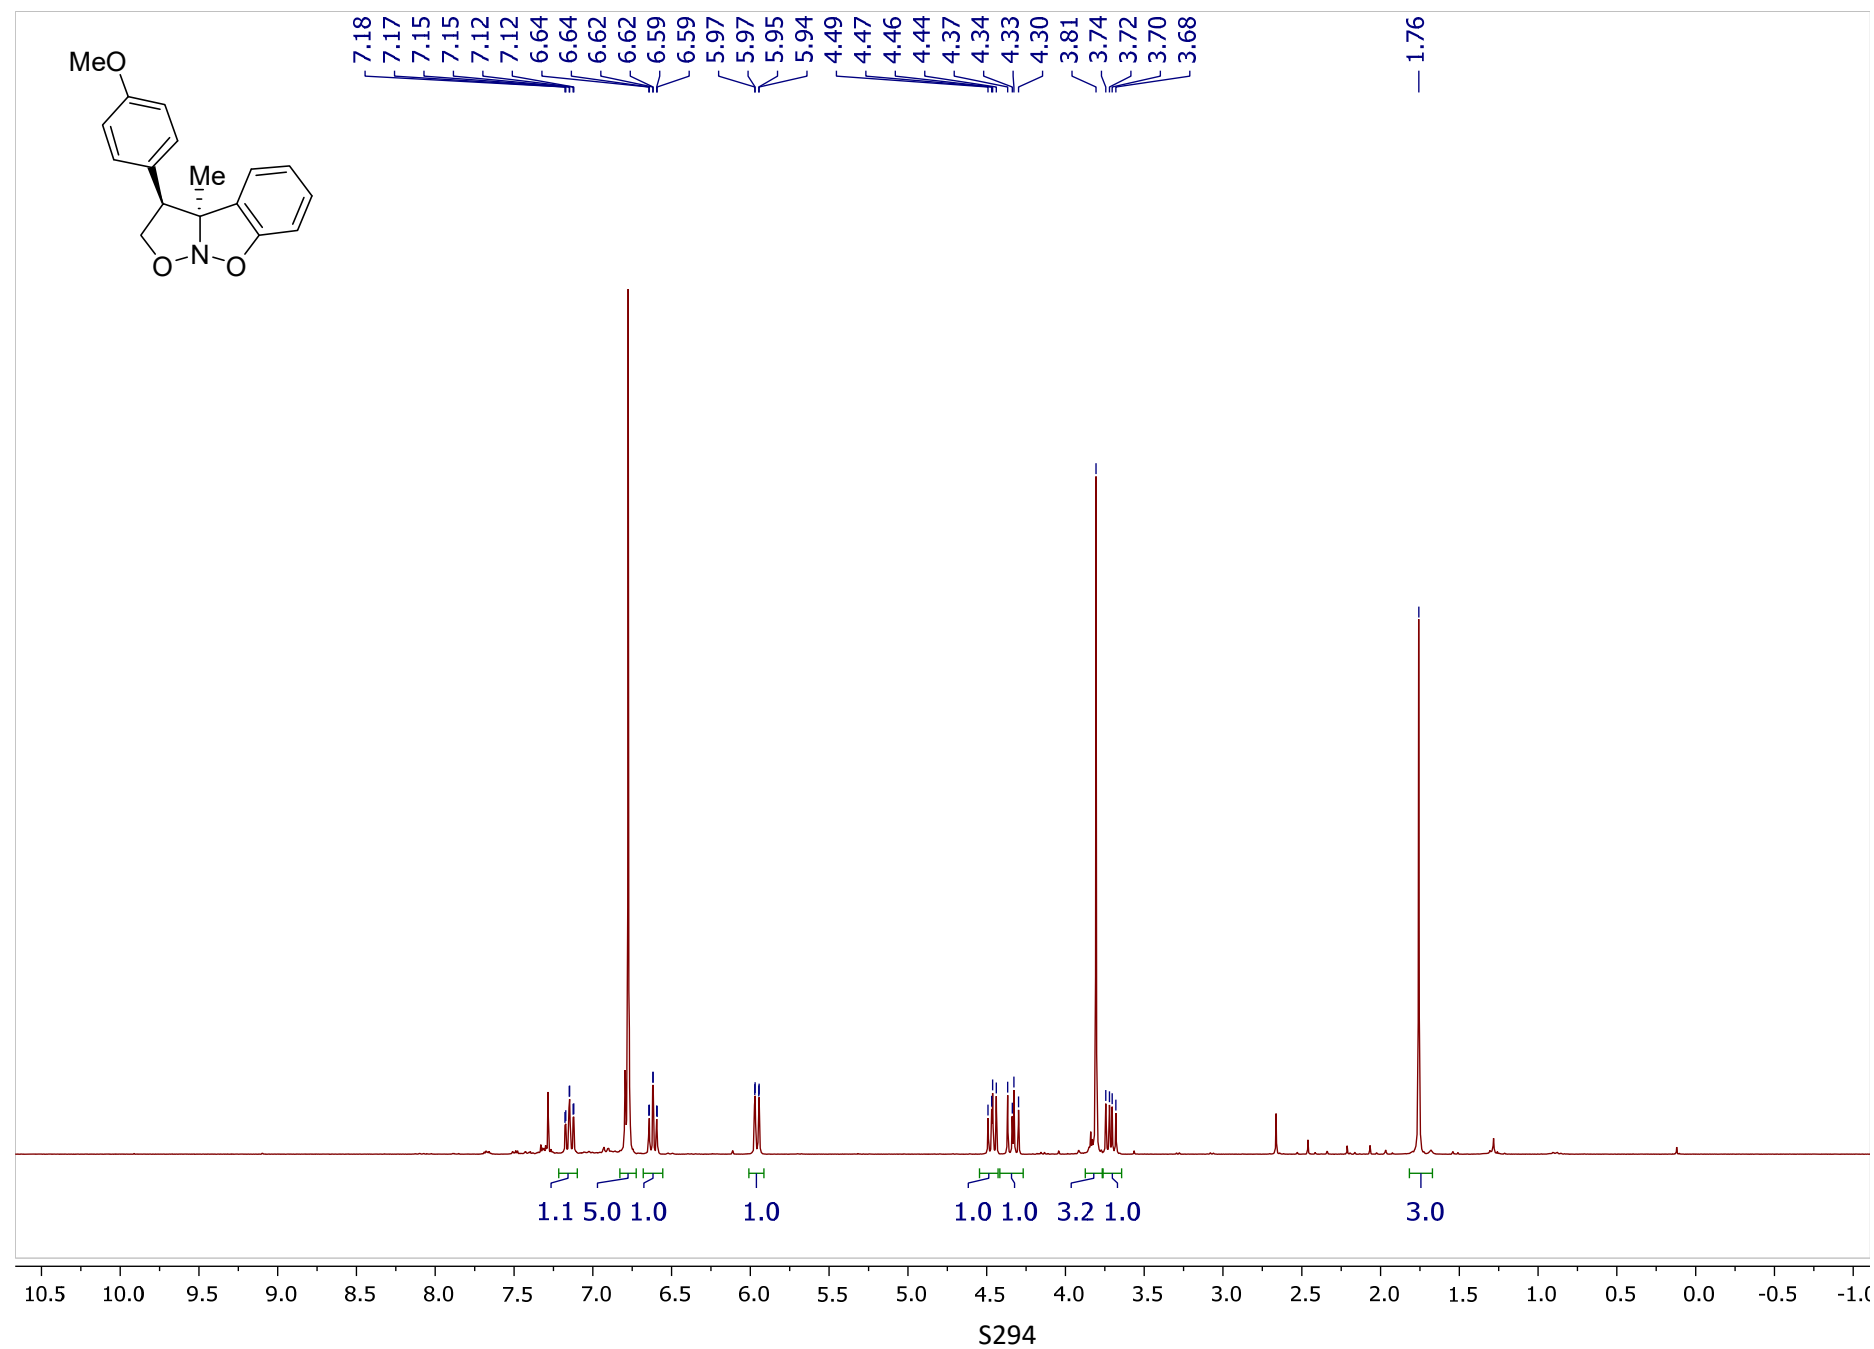

<sup>13</sup>C NMR (75 MHz, CDCl<sub>3</sub>)

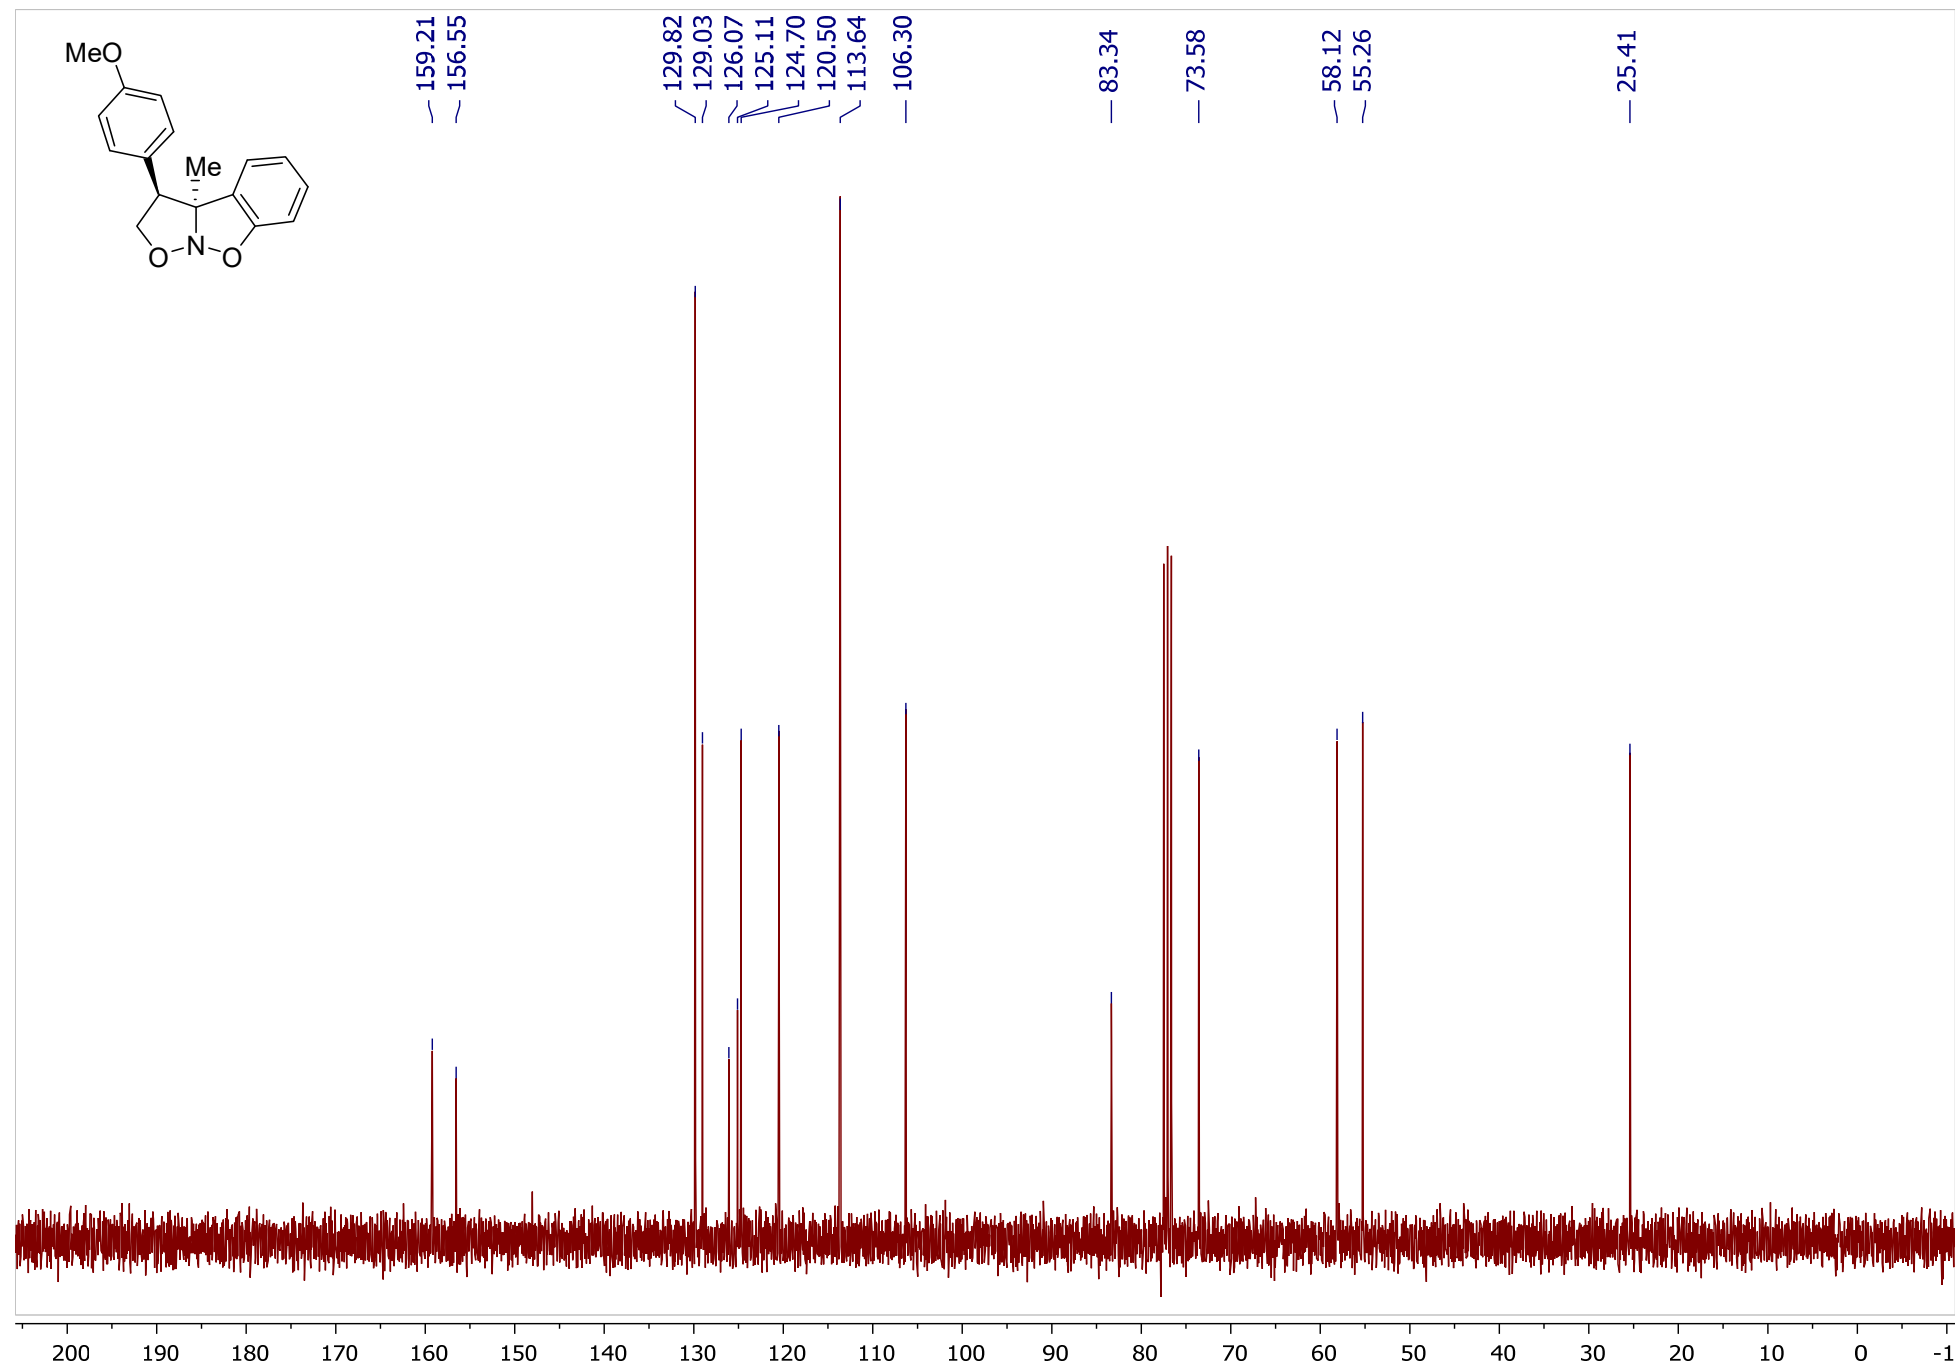

S295

$^{13}\text{C}$  DEPT 135 (75 MHz,  $\text{CDCl}_3$ )

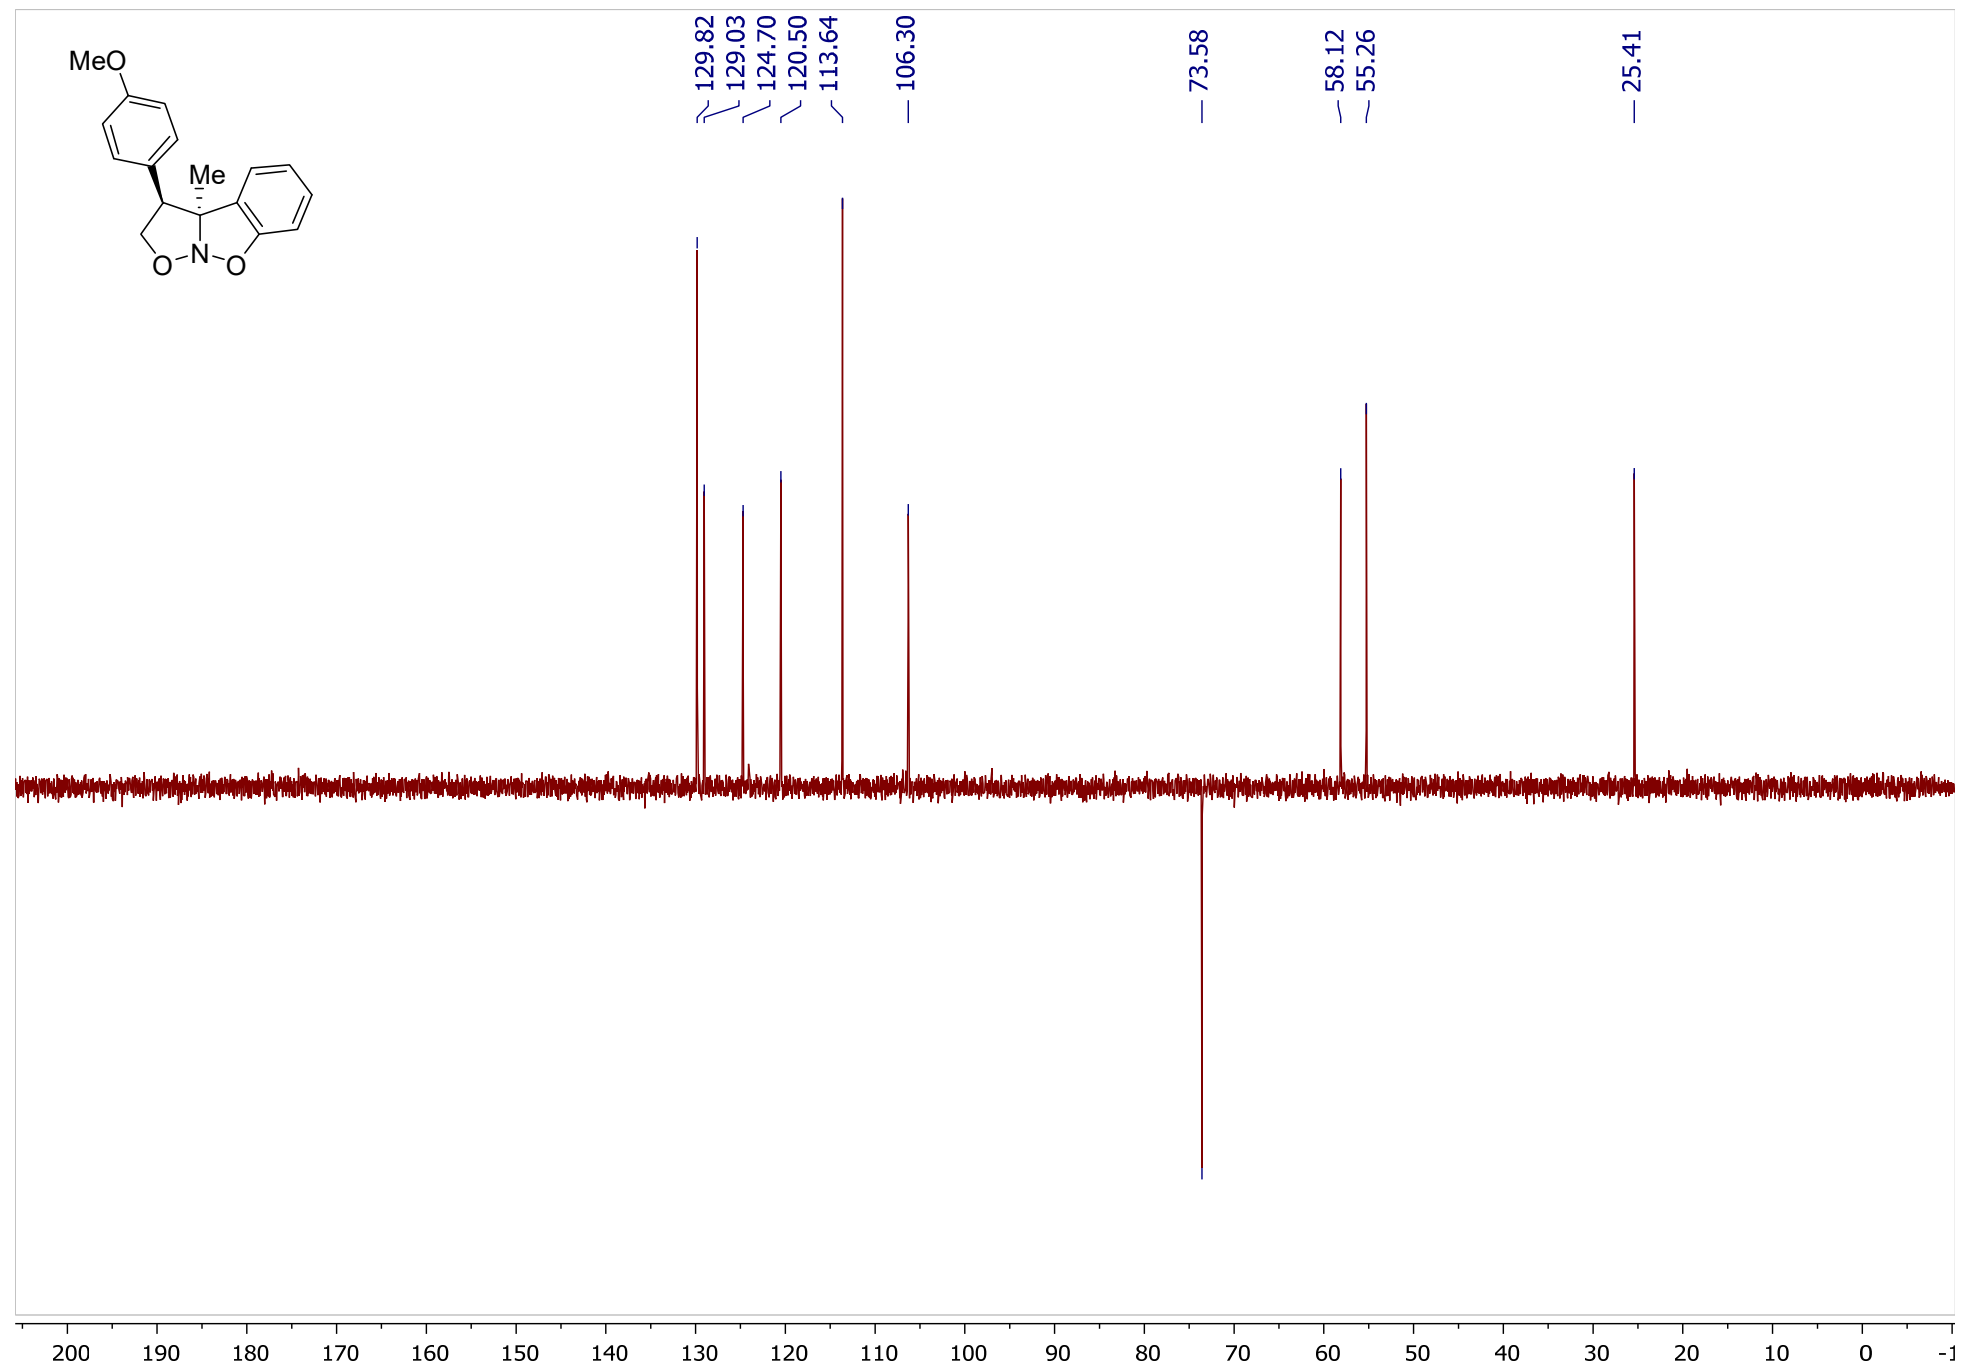





$^1\text{H}$ - $^{13}\text{C}$  HSQC

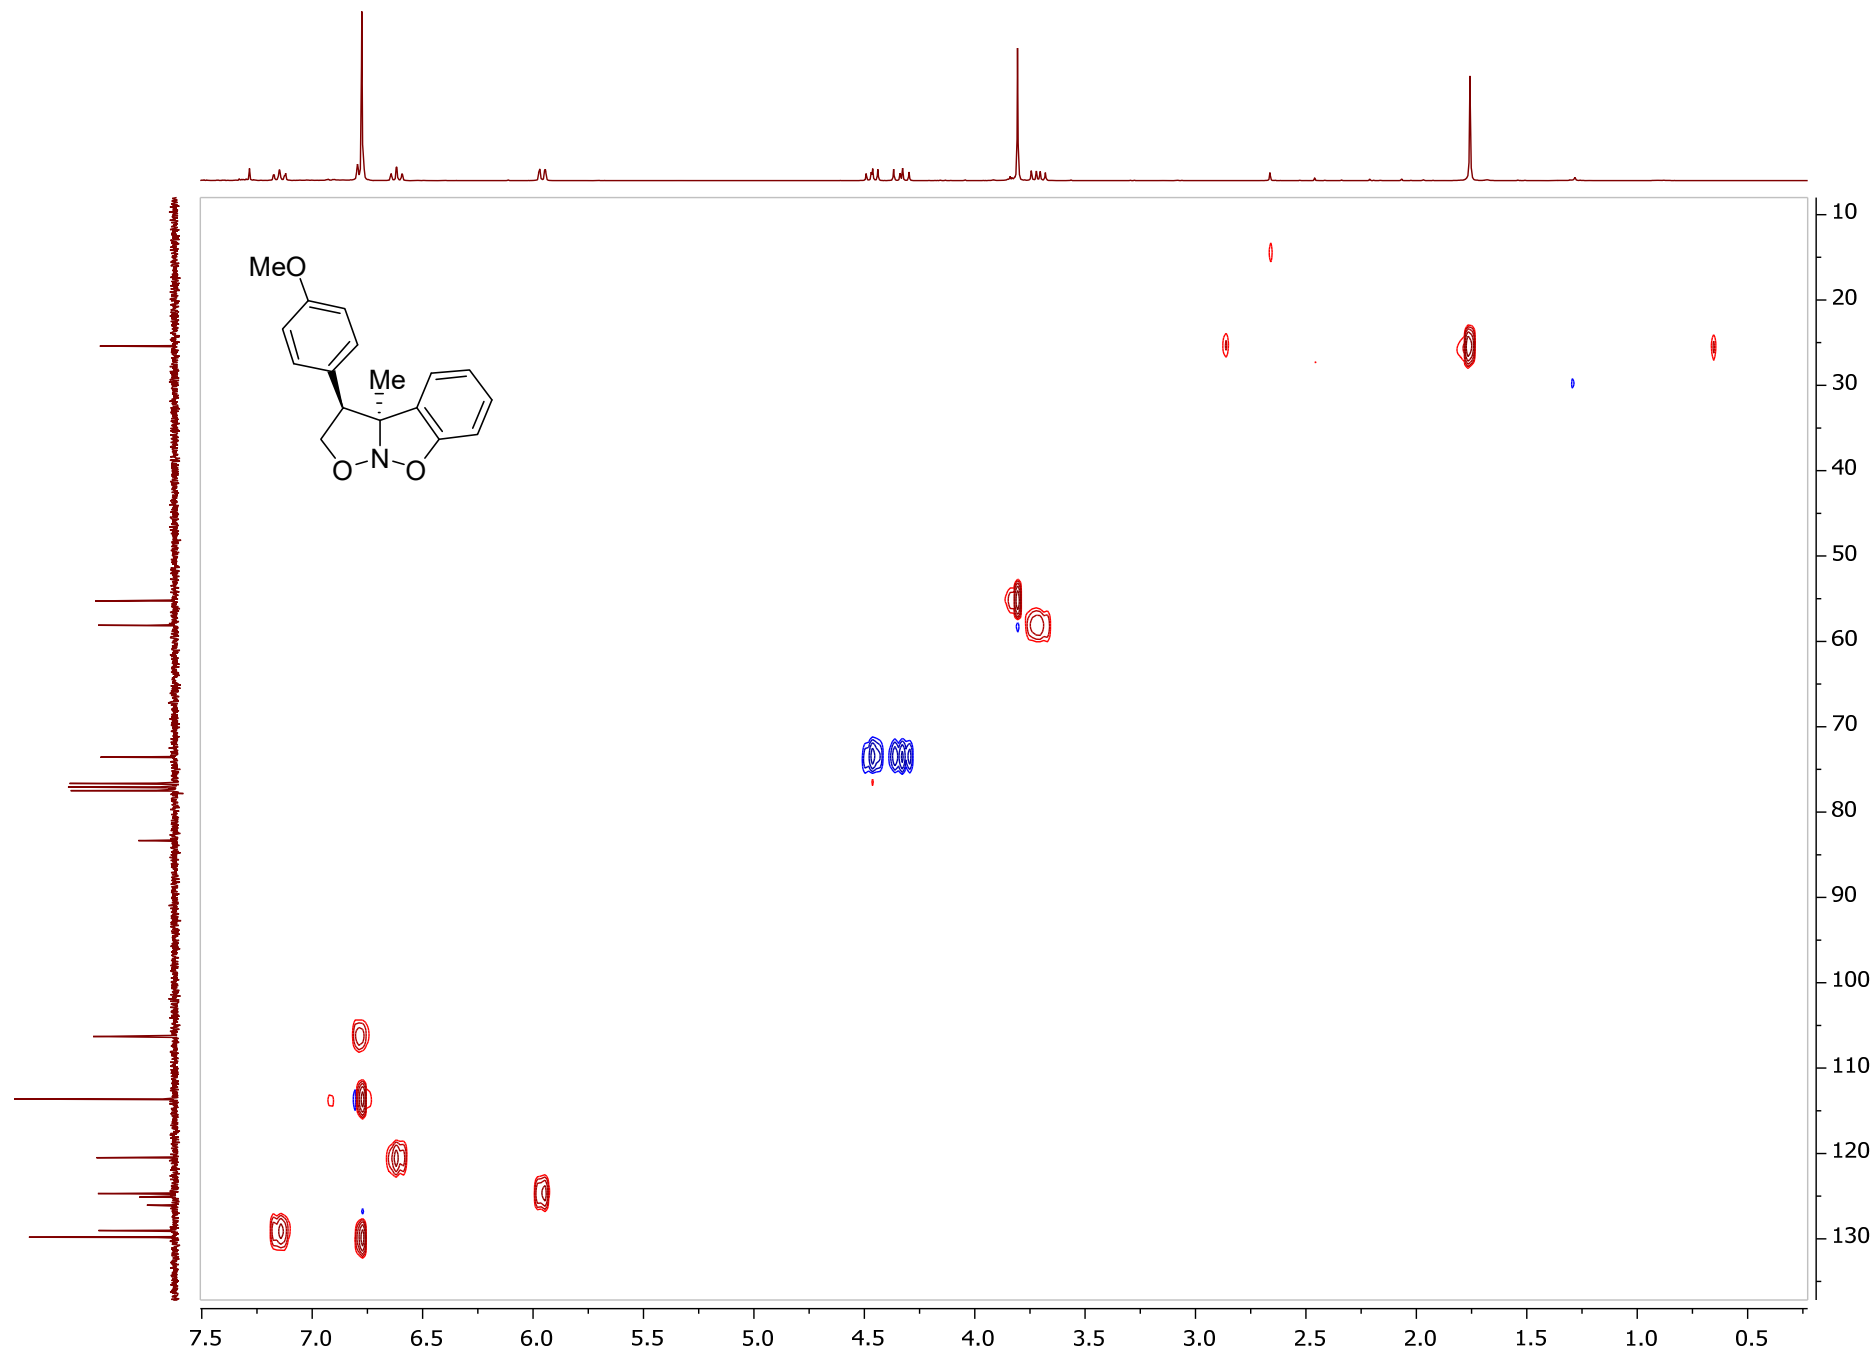

$^1\text{H}$ - $^{13}\text{C}$  HMBC

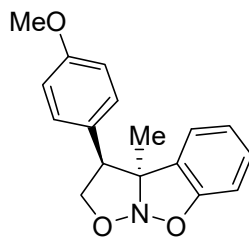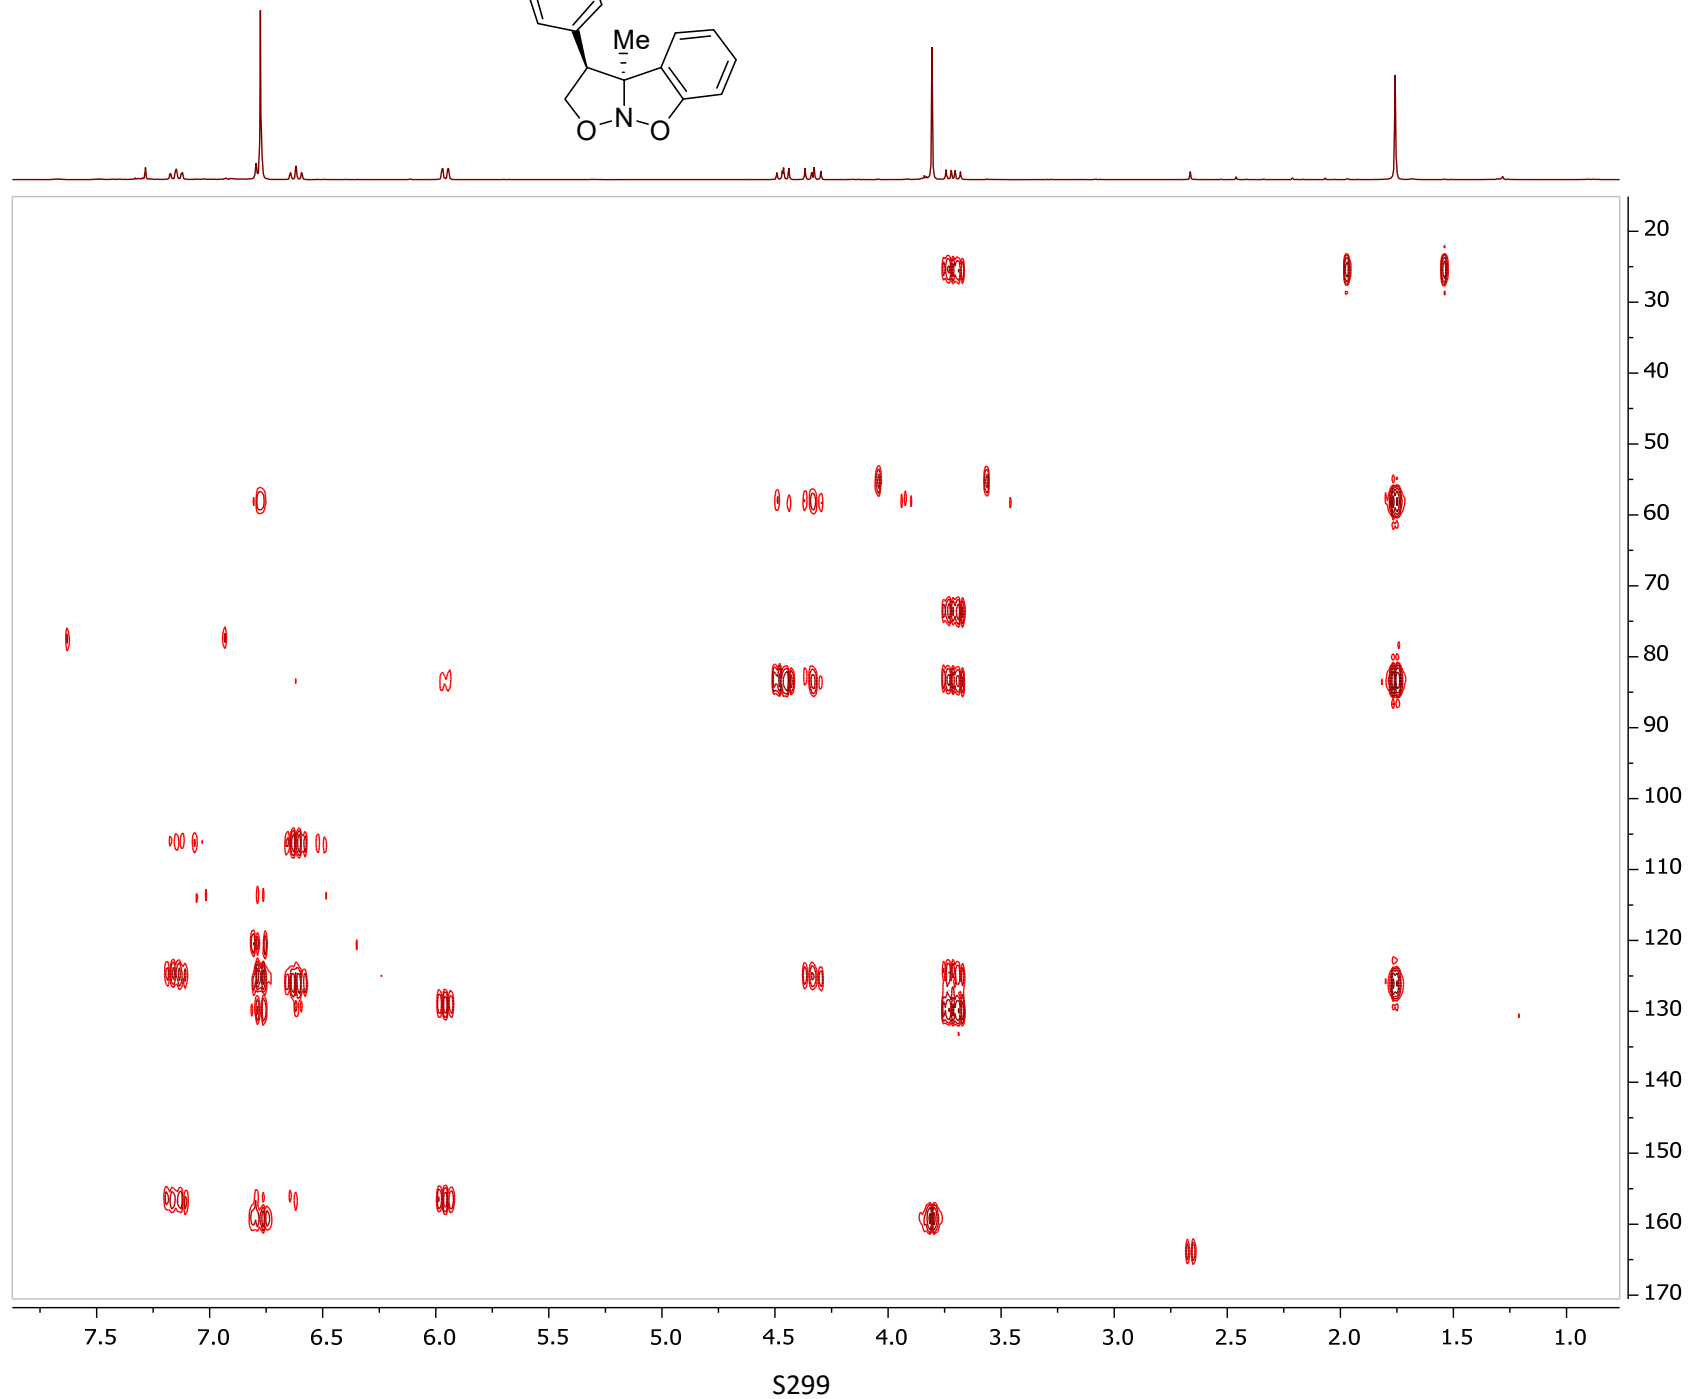

$^1\text{H}$ - $^1\text{H}$  NOESY

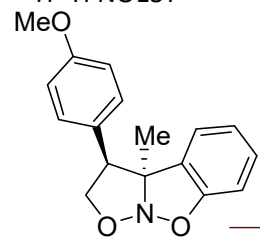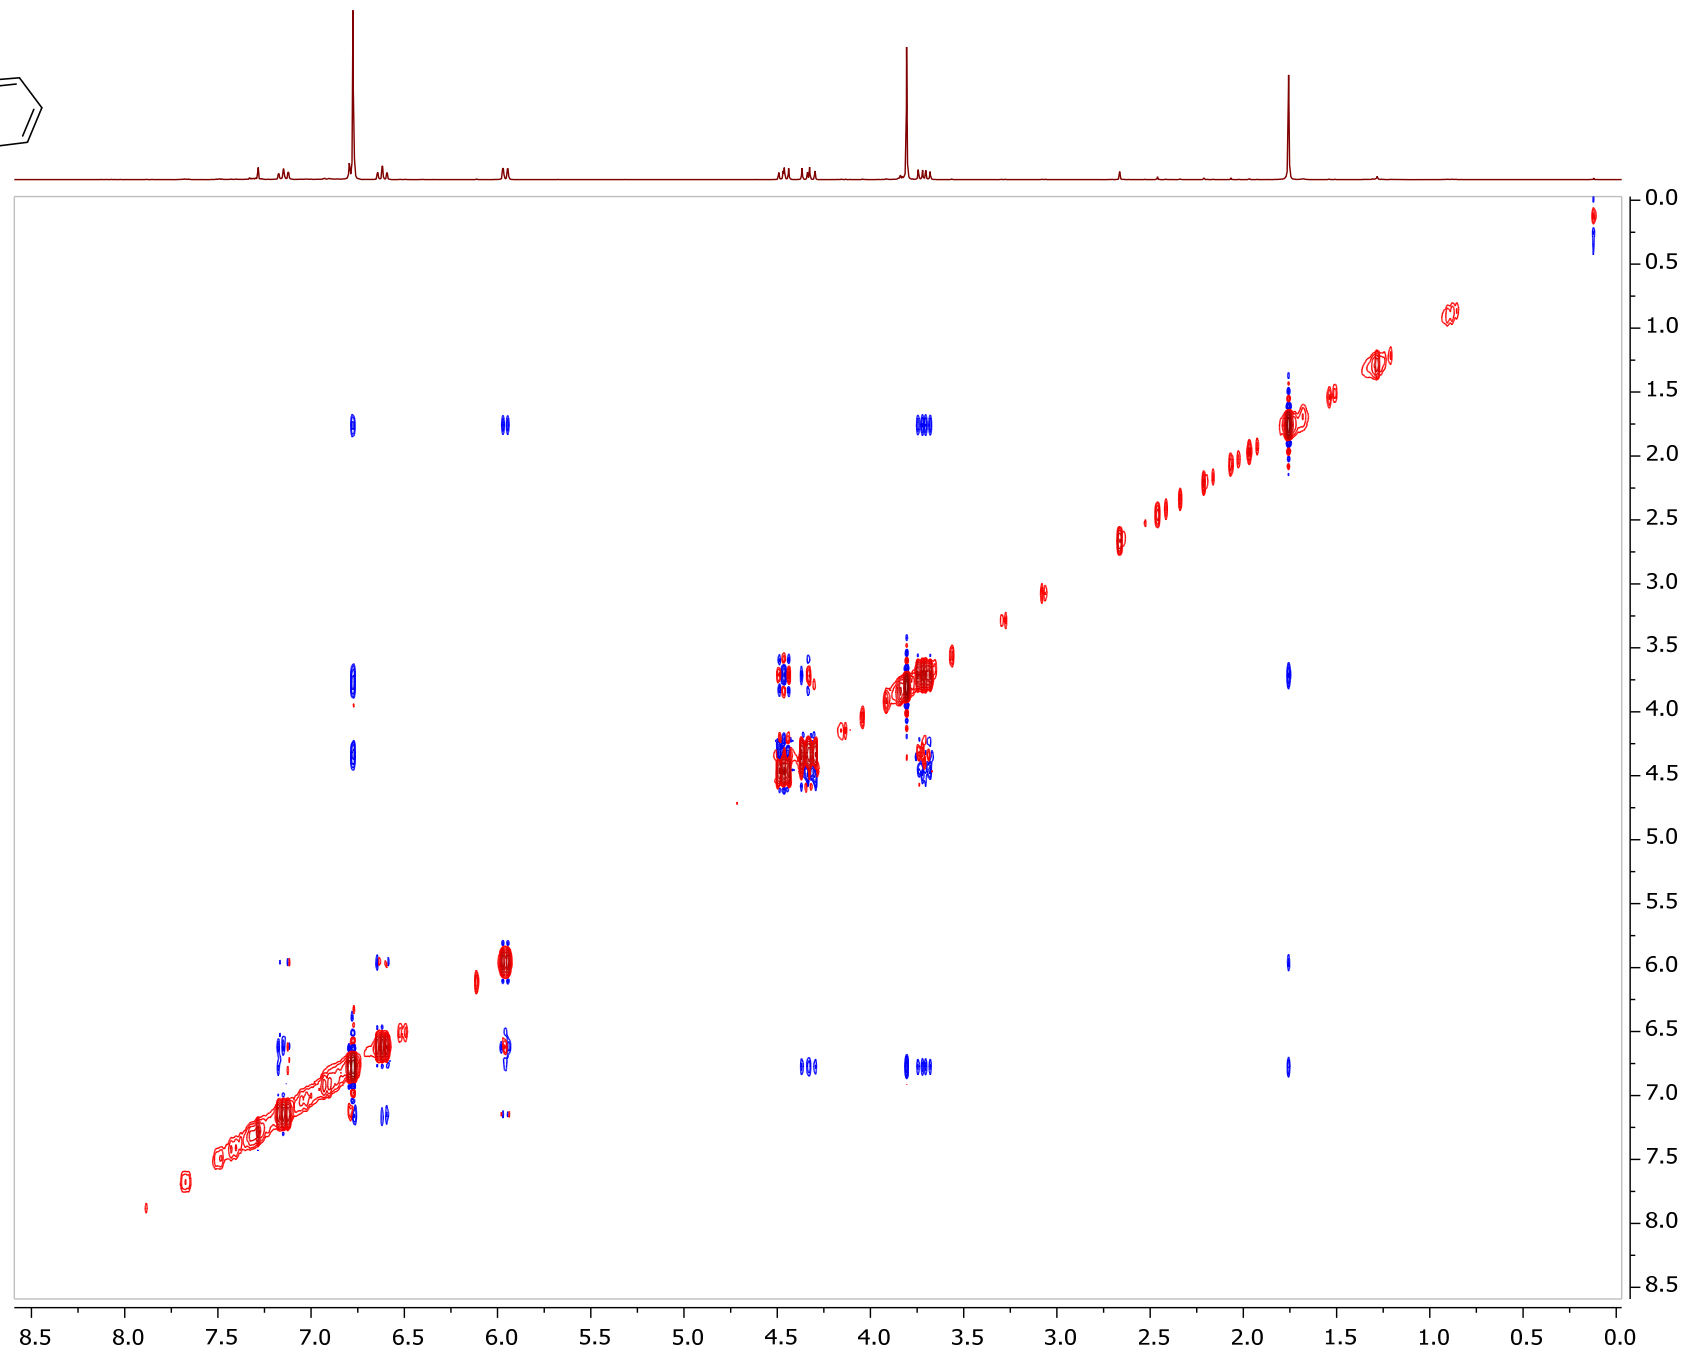

S300

Ethyl (2*S*\*,3*S*\*,3*aS*\*)-3-(4-methoxyphenyl)-3*a*-methyl-3,3*a*-dihydro-2*H*-benzo[*d*]isoxazolo[2,3-*b*]isoxazole-2-carboxylate 6ga

<sup>1</sup>H NMR (300 MHz, CDCl<sub>3</sub>)

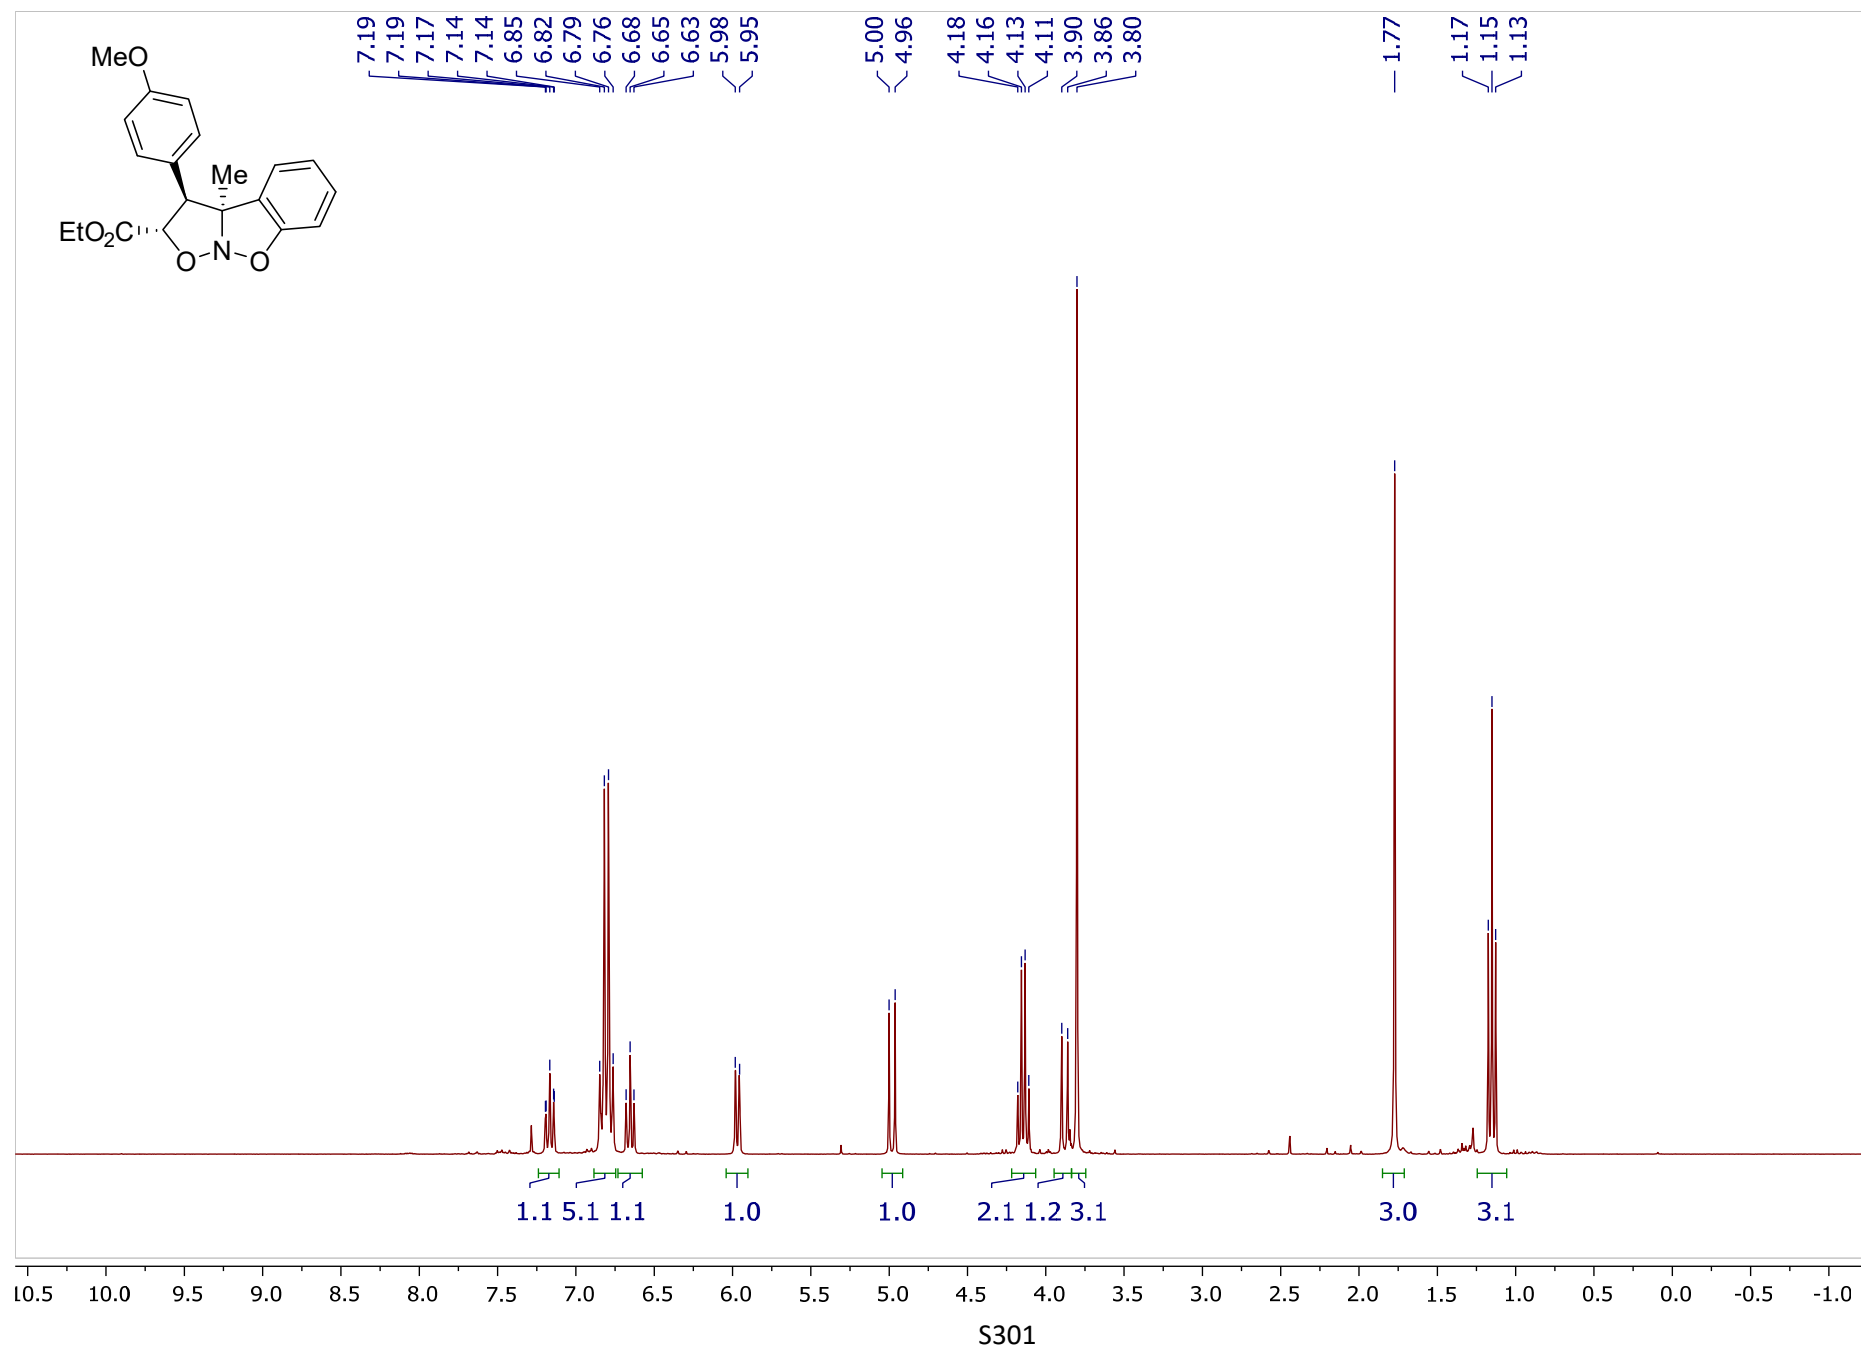

<sup>13</sup>C NMR (75 MHz, CDCl<sub>3</sub>)

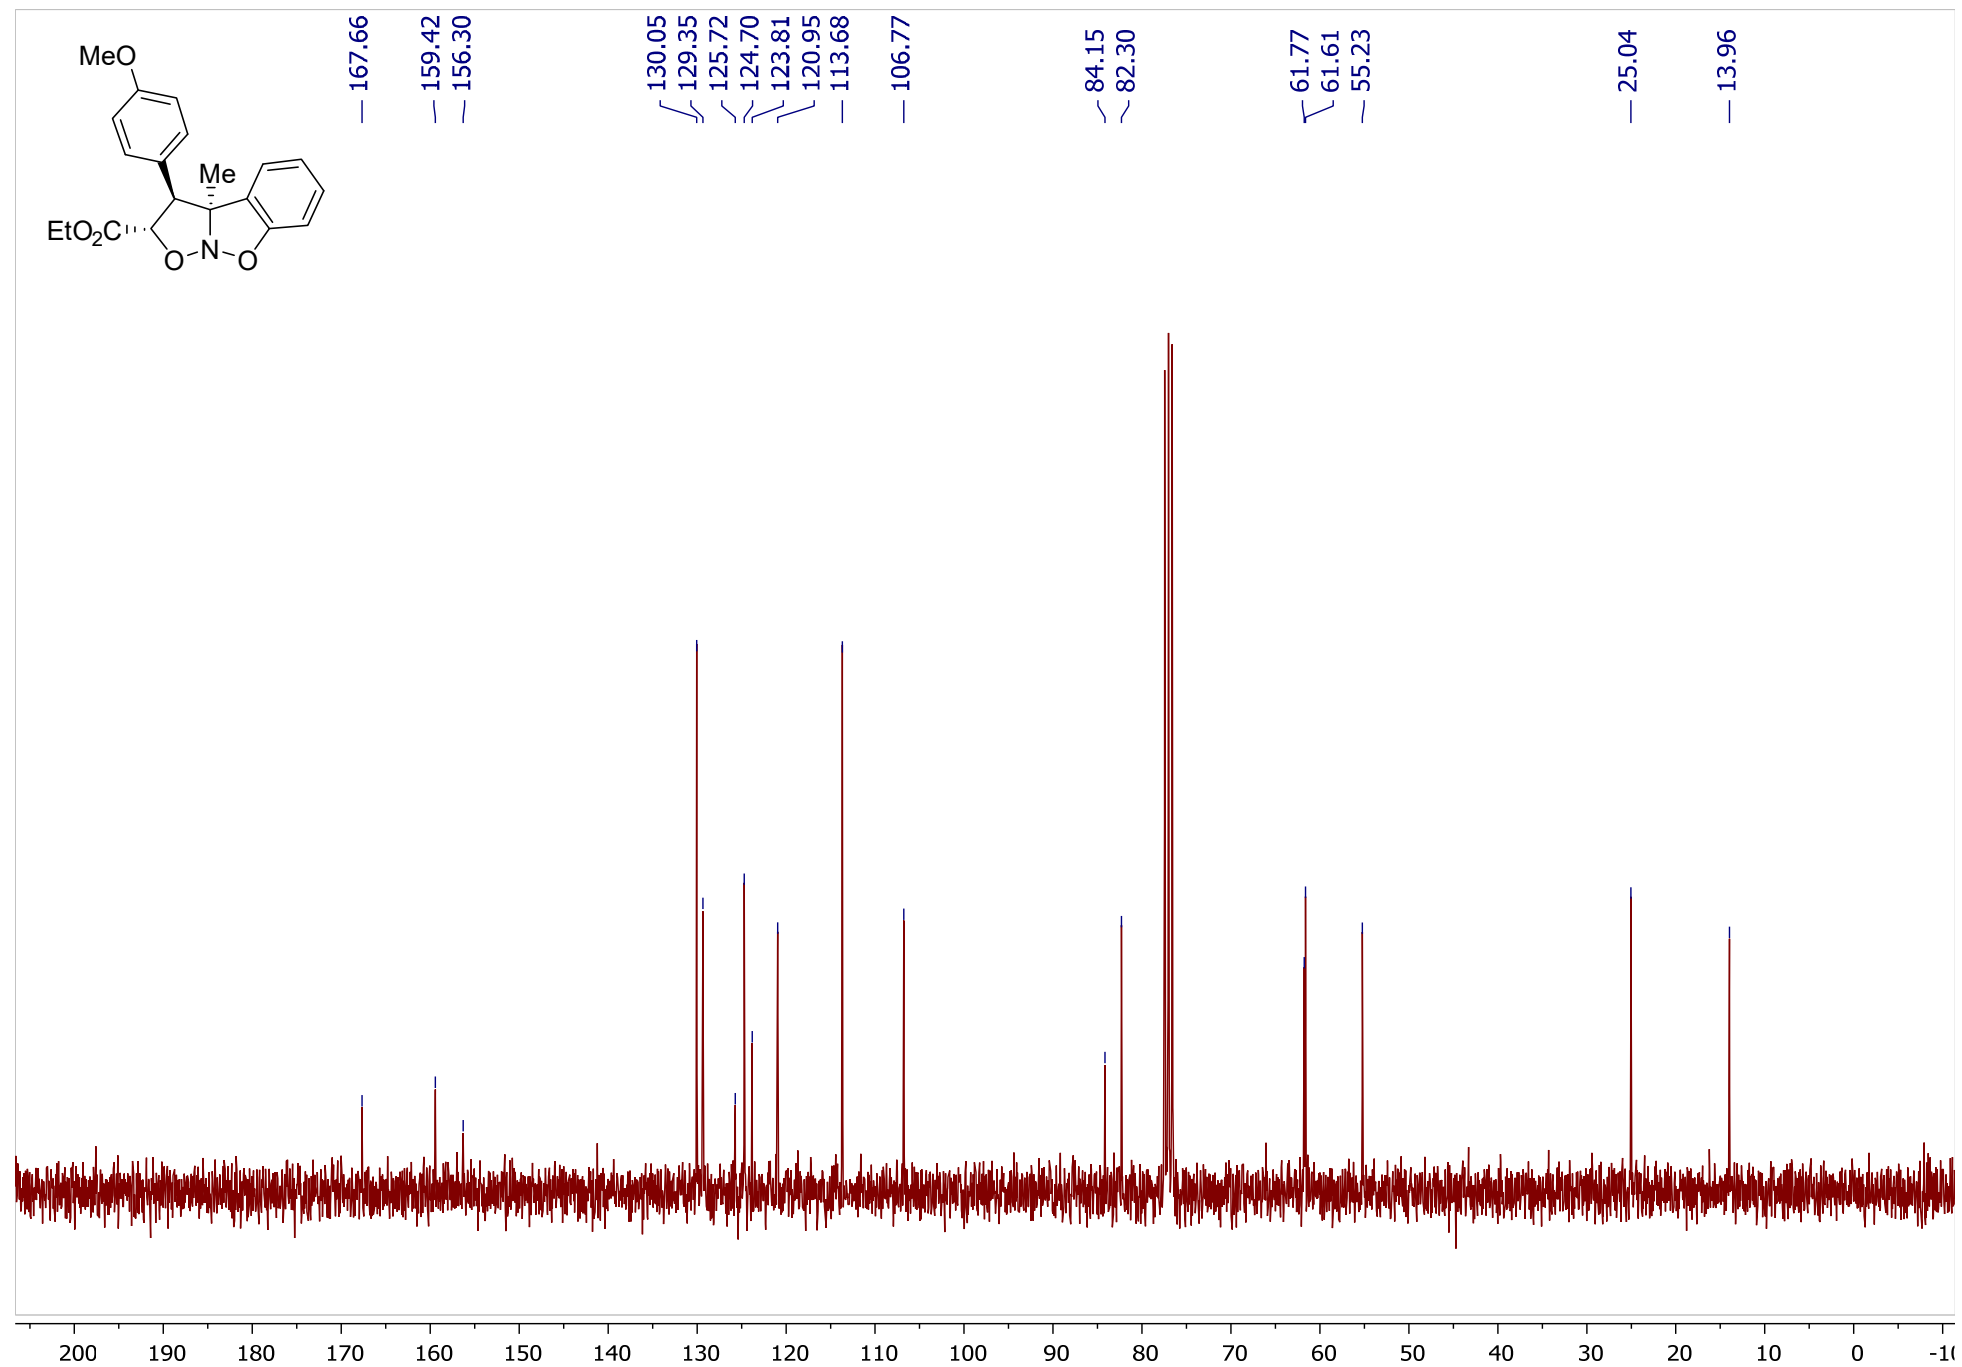

$^{13}\text{C}$  DEPT 135 (75 MHz,  $\text{CDCl}_3$ )

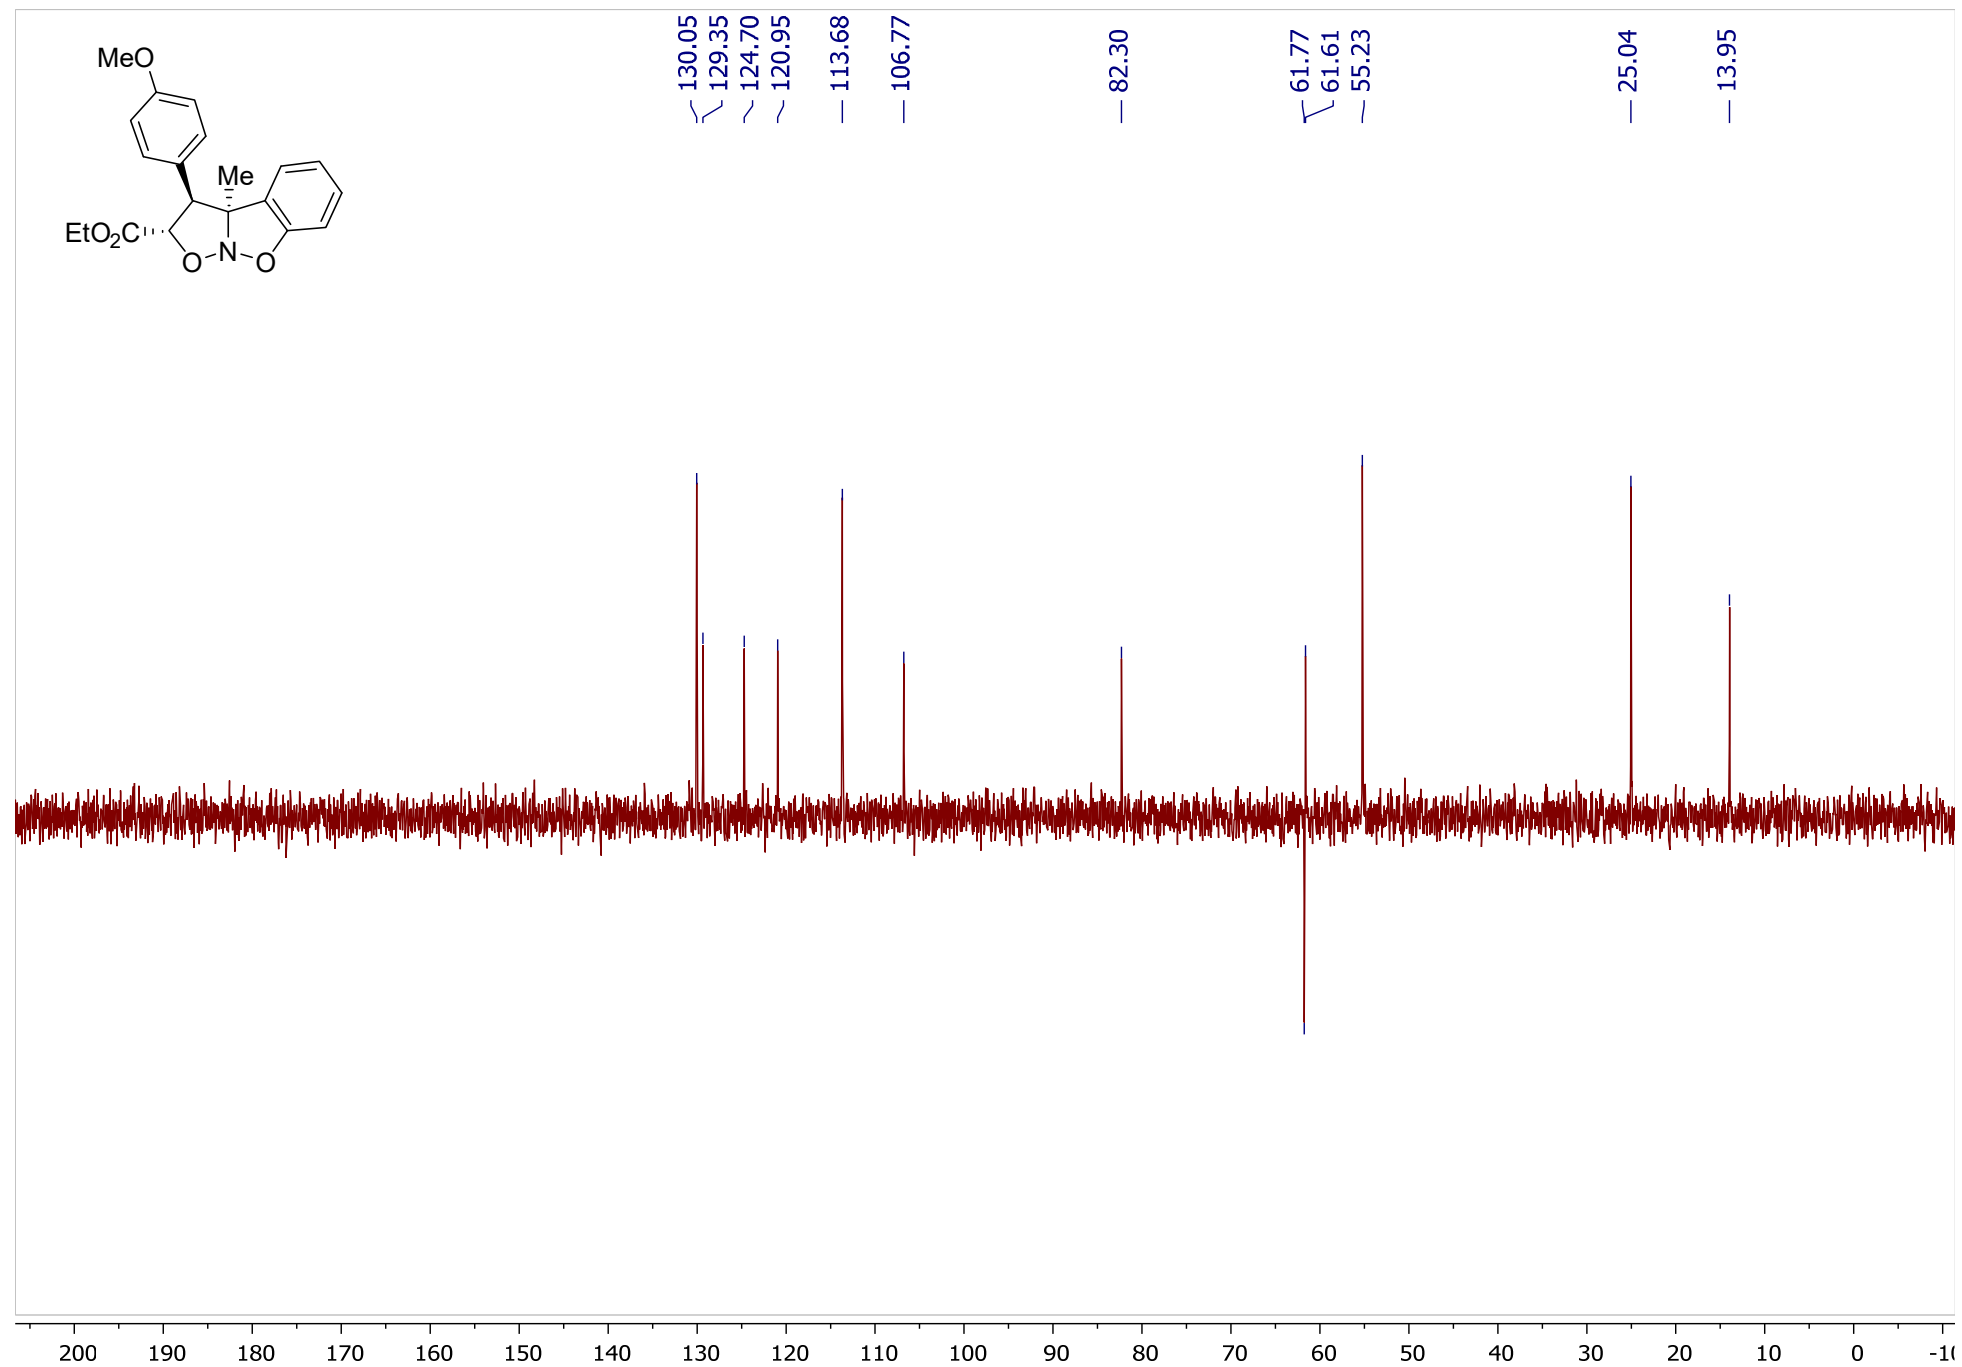

S303

$^1\text{H}$ - $^1\text{H}$  NOESY

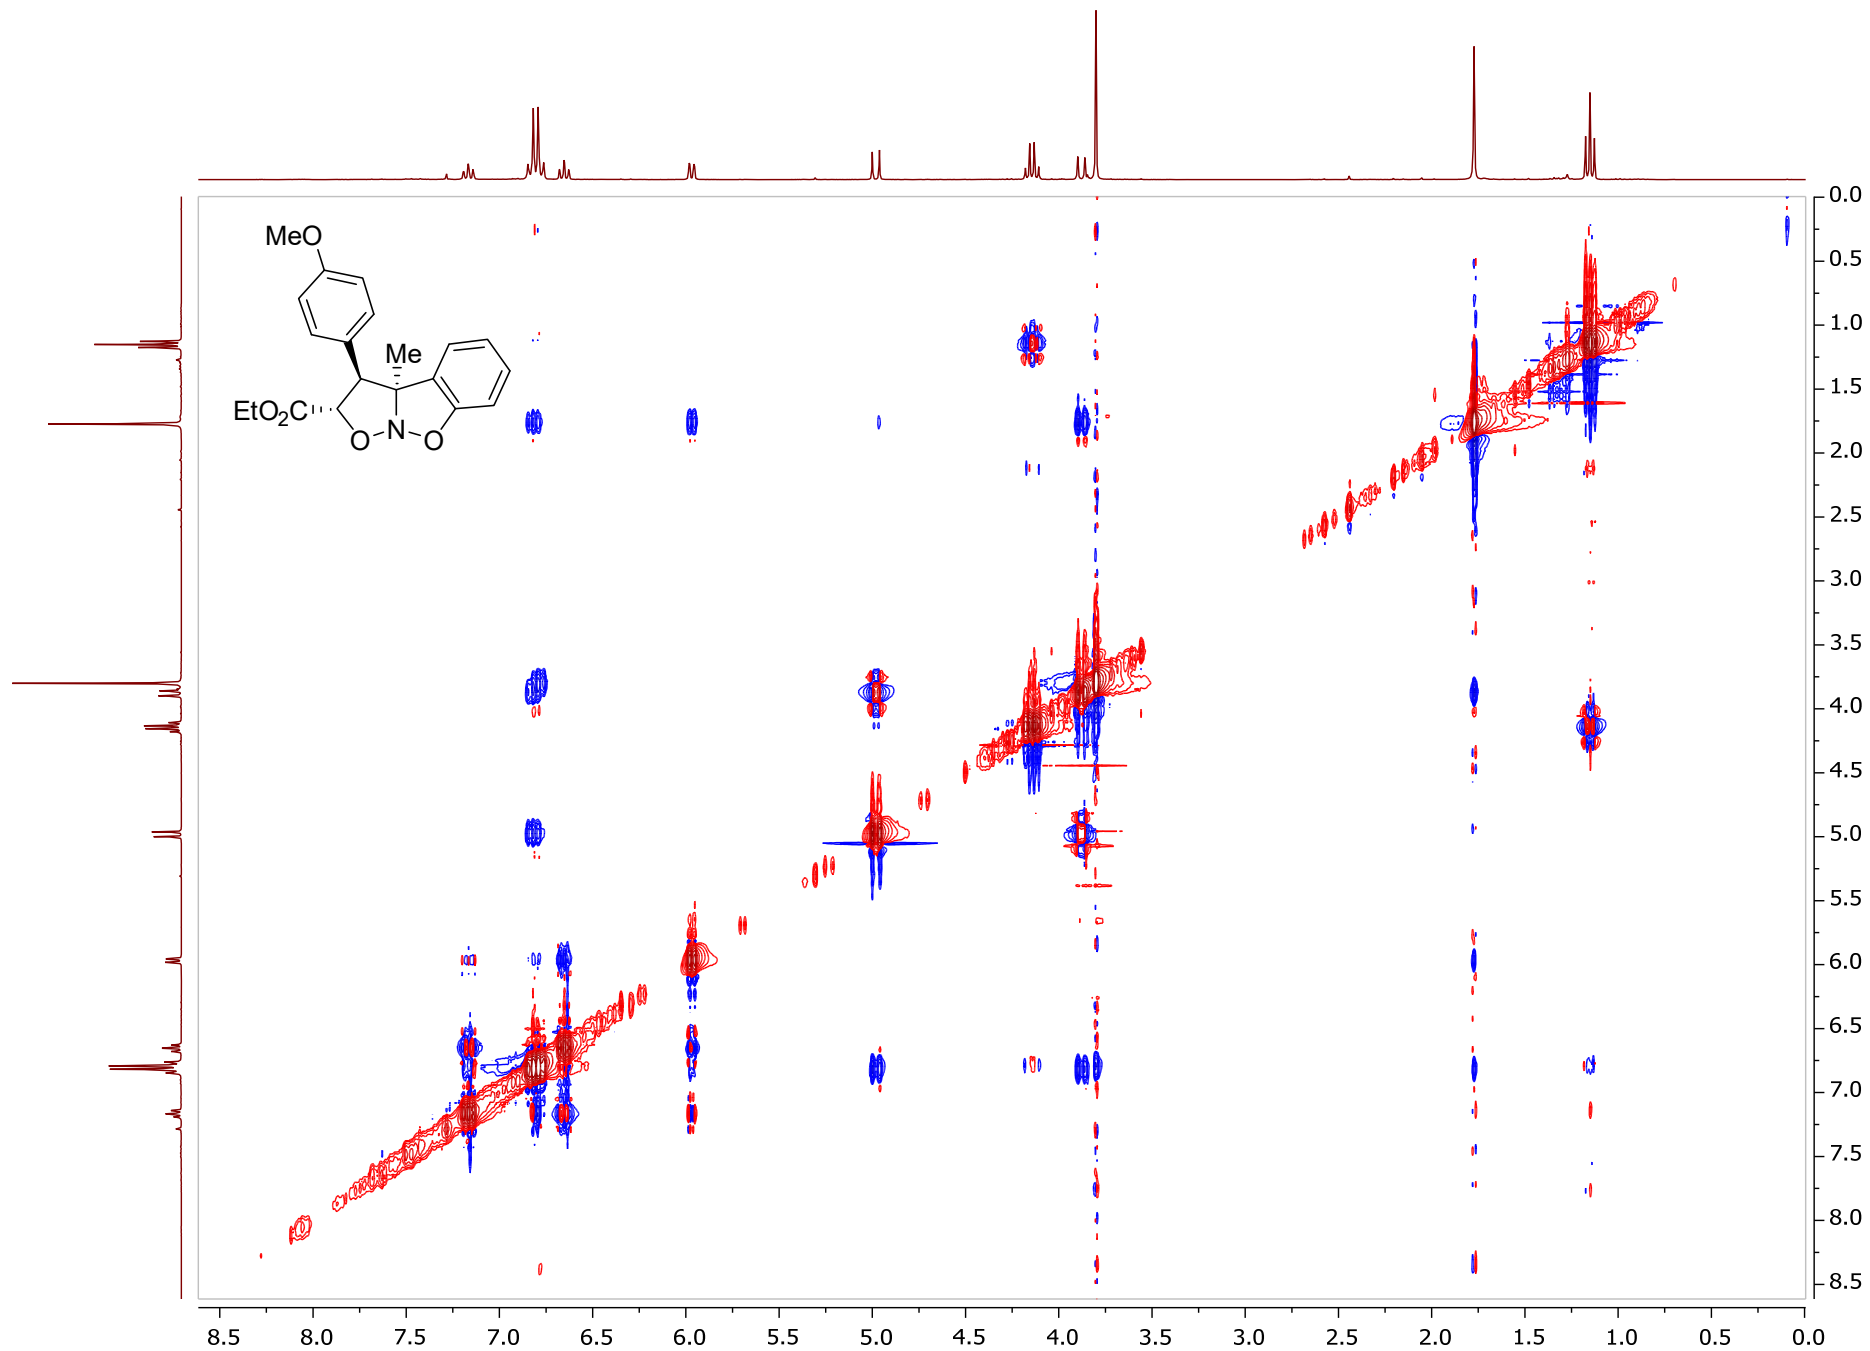



**(2*R*\*,3*R*\*,3*aR*\*)-3,3a-Dimethyl-2-phenyl-3,3a-dihydro-2H-benzo[d]isoxazolo[2,3-b]isoxazole 6ha**

<sup>1</sup>H NMR (300 MHz, CDCl<sub>3</sub>)

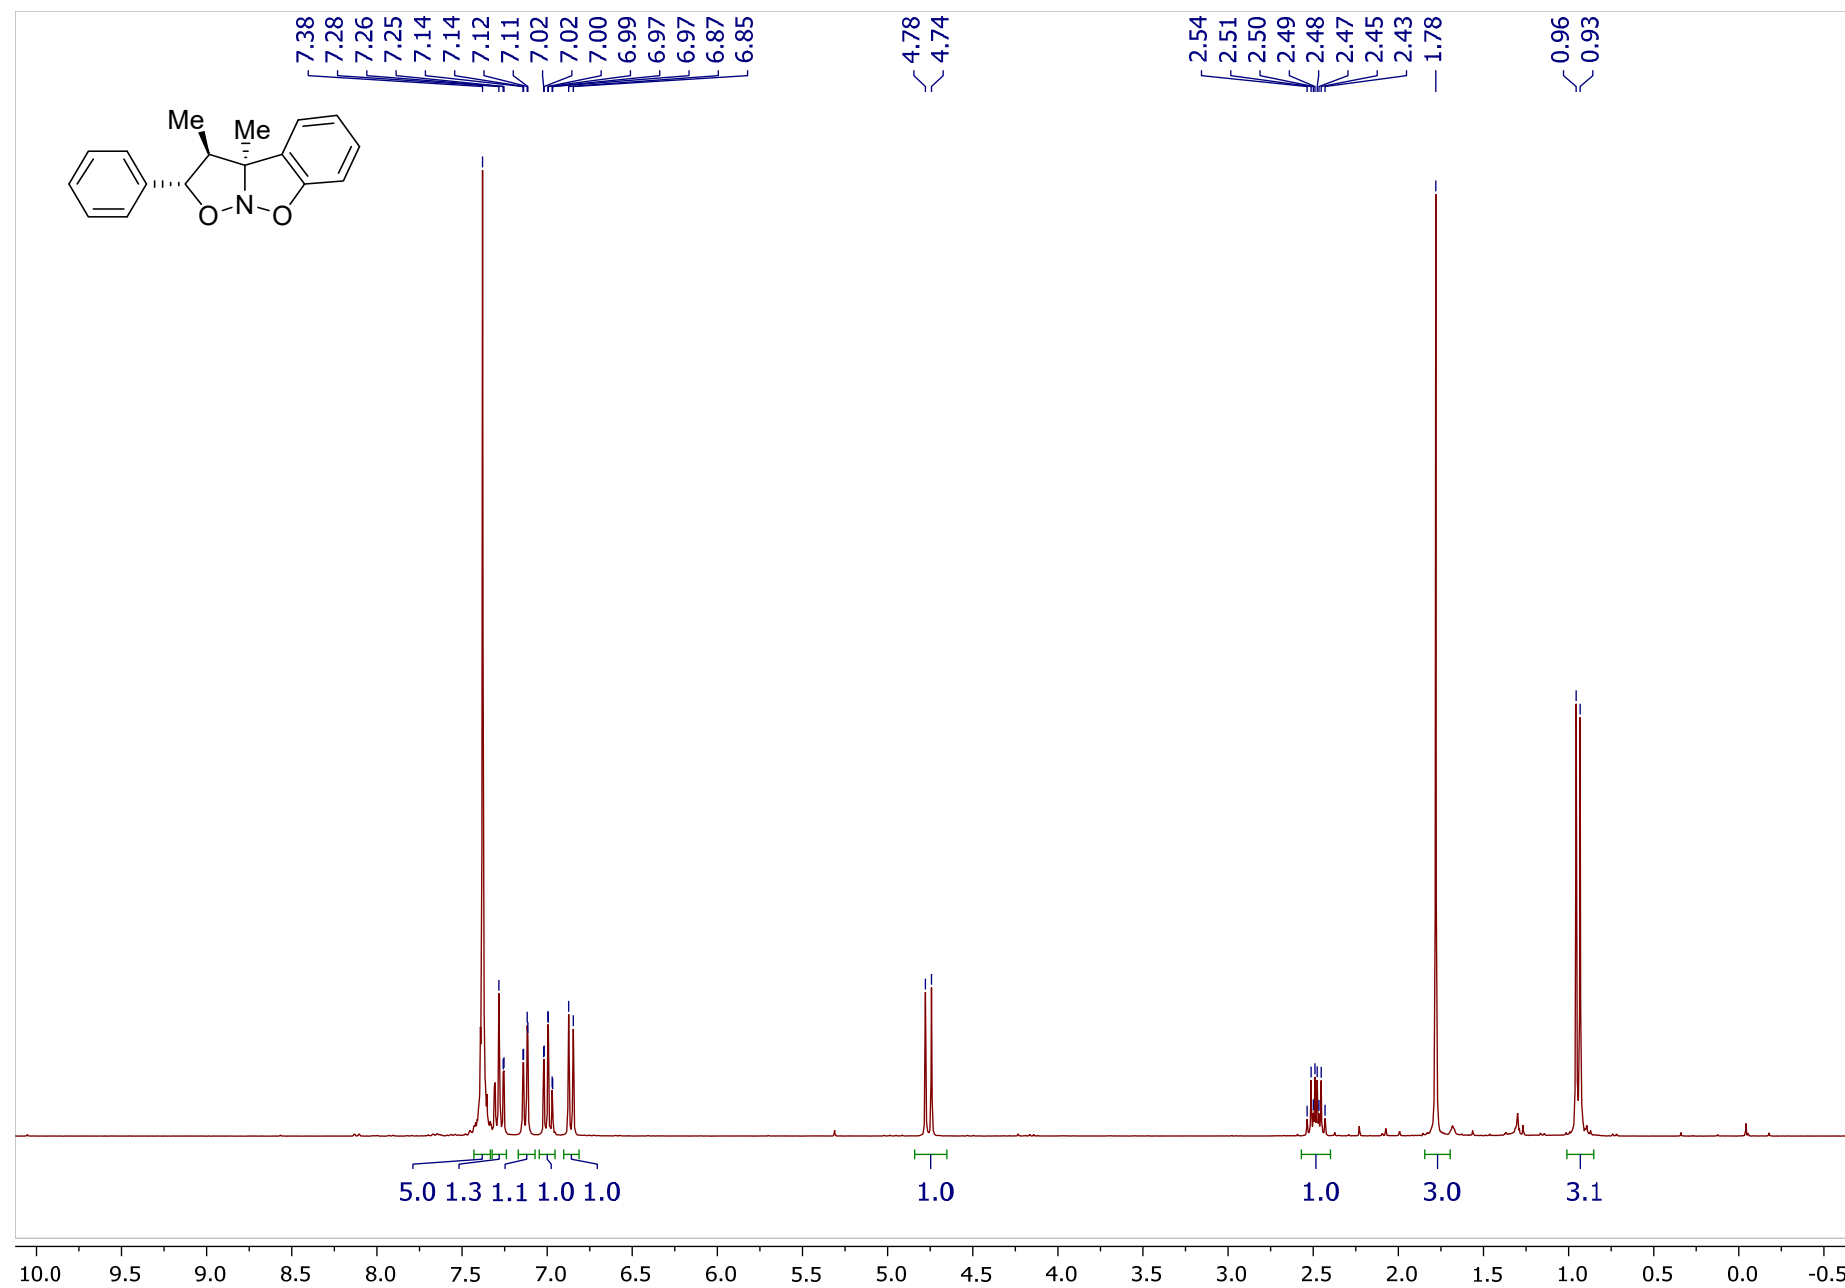

$^{13}\text{C}$  NMR (75 MHz,  $\text{CDCl}_3$ )

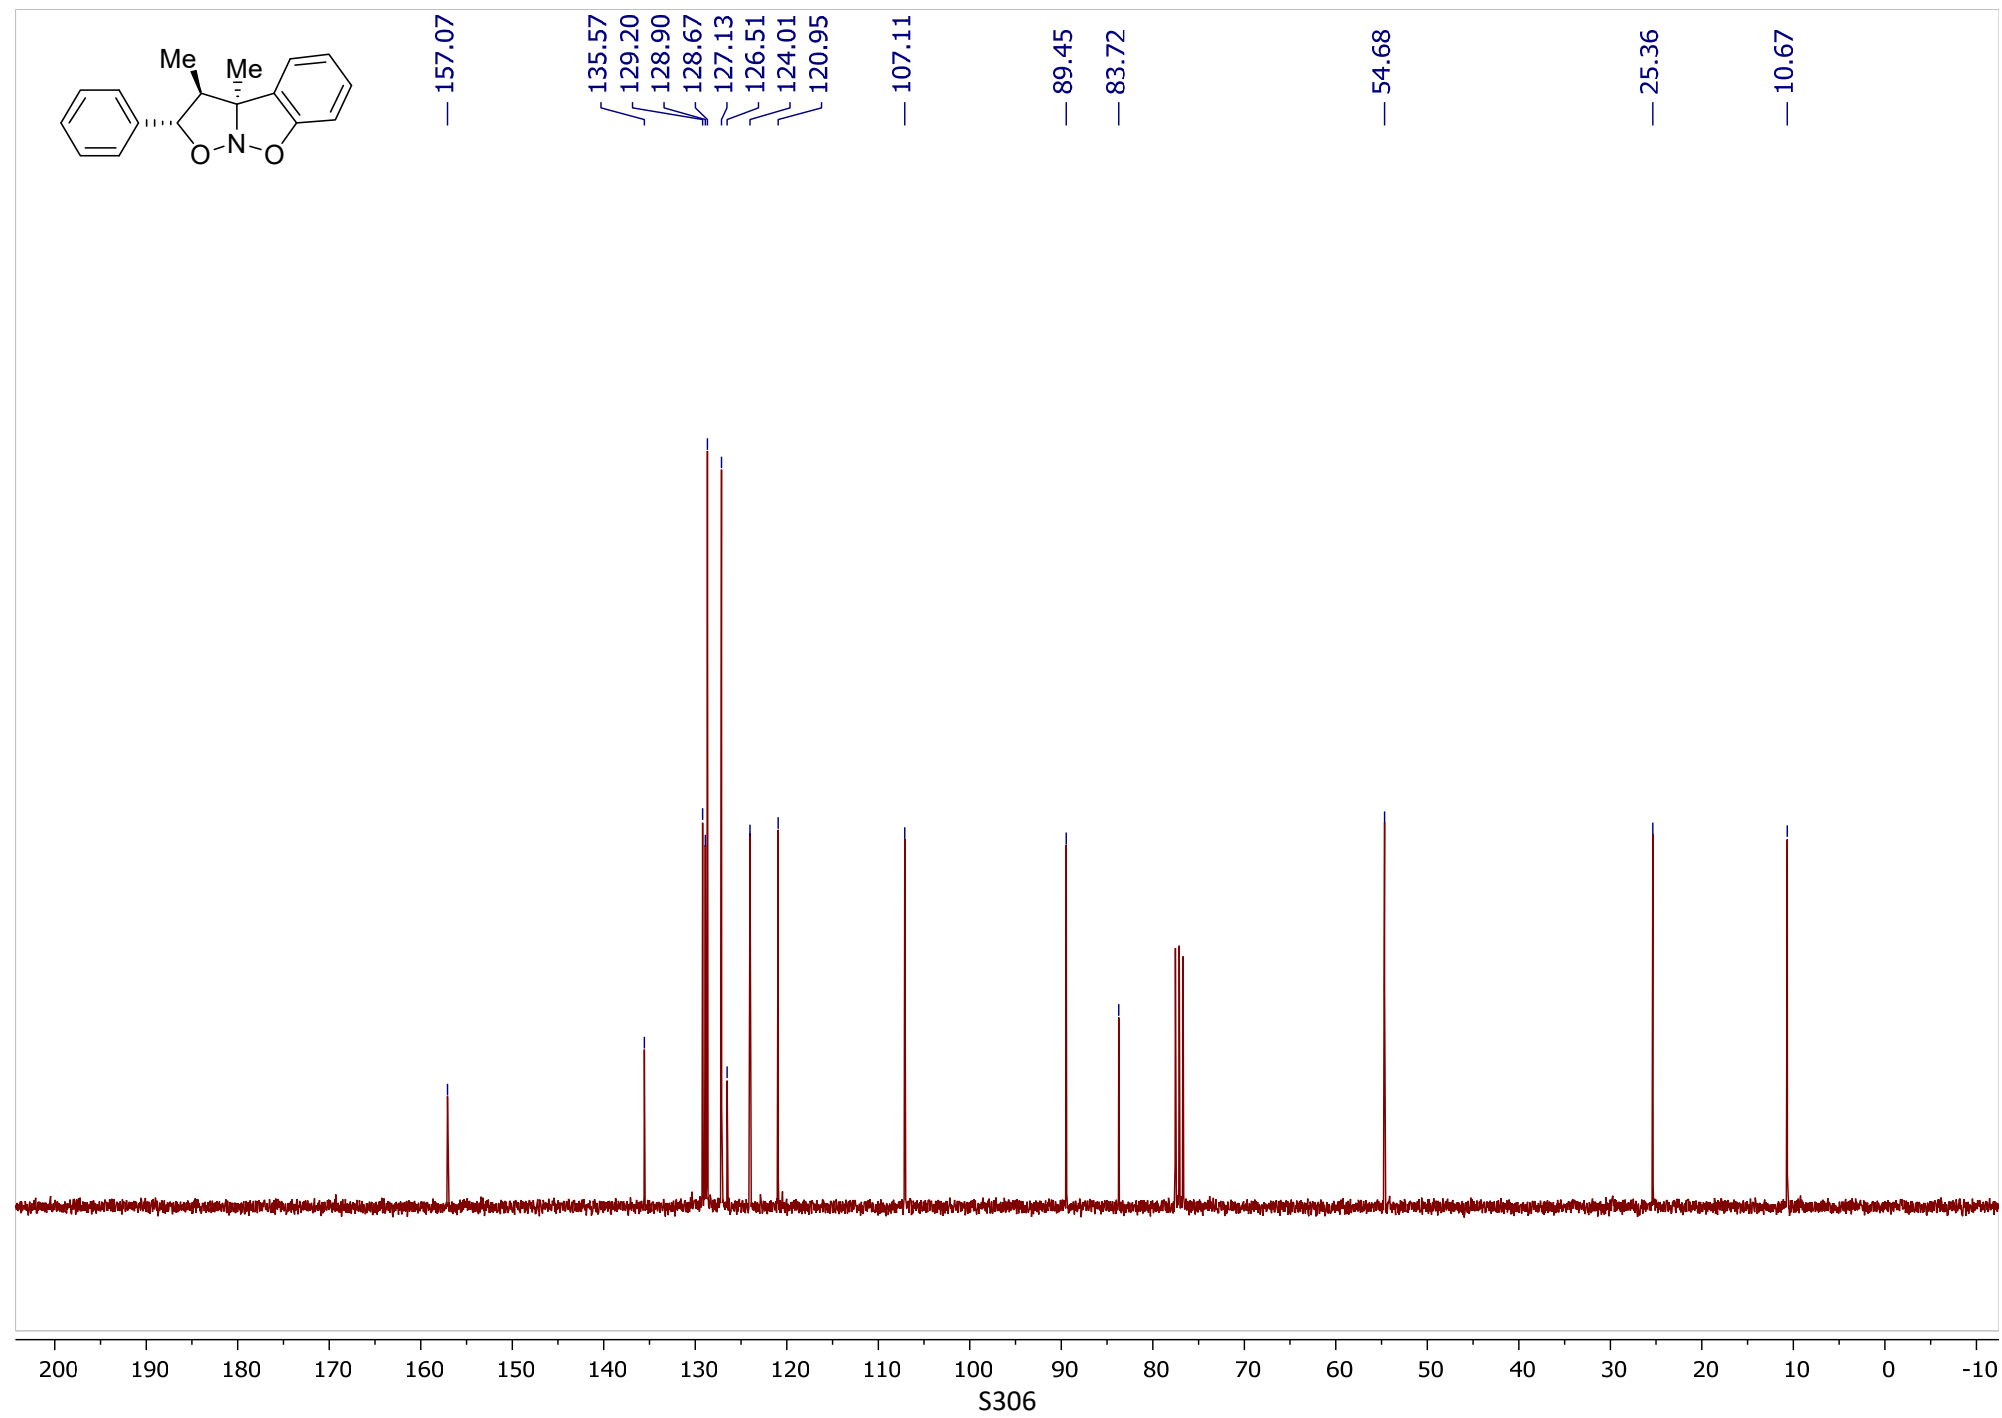

$^{13}\text{C}$  DEPT 135 (75 MHz,  $\text{CDCl}_3$ )

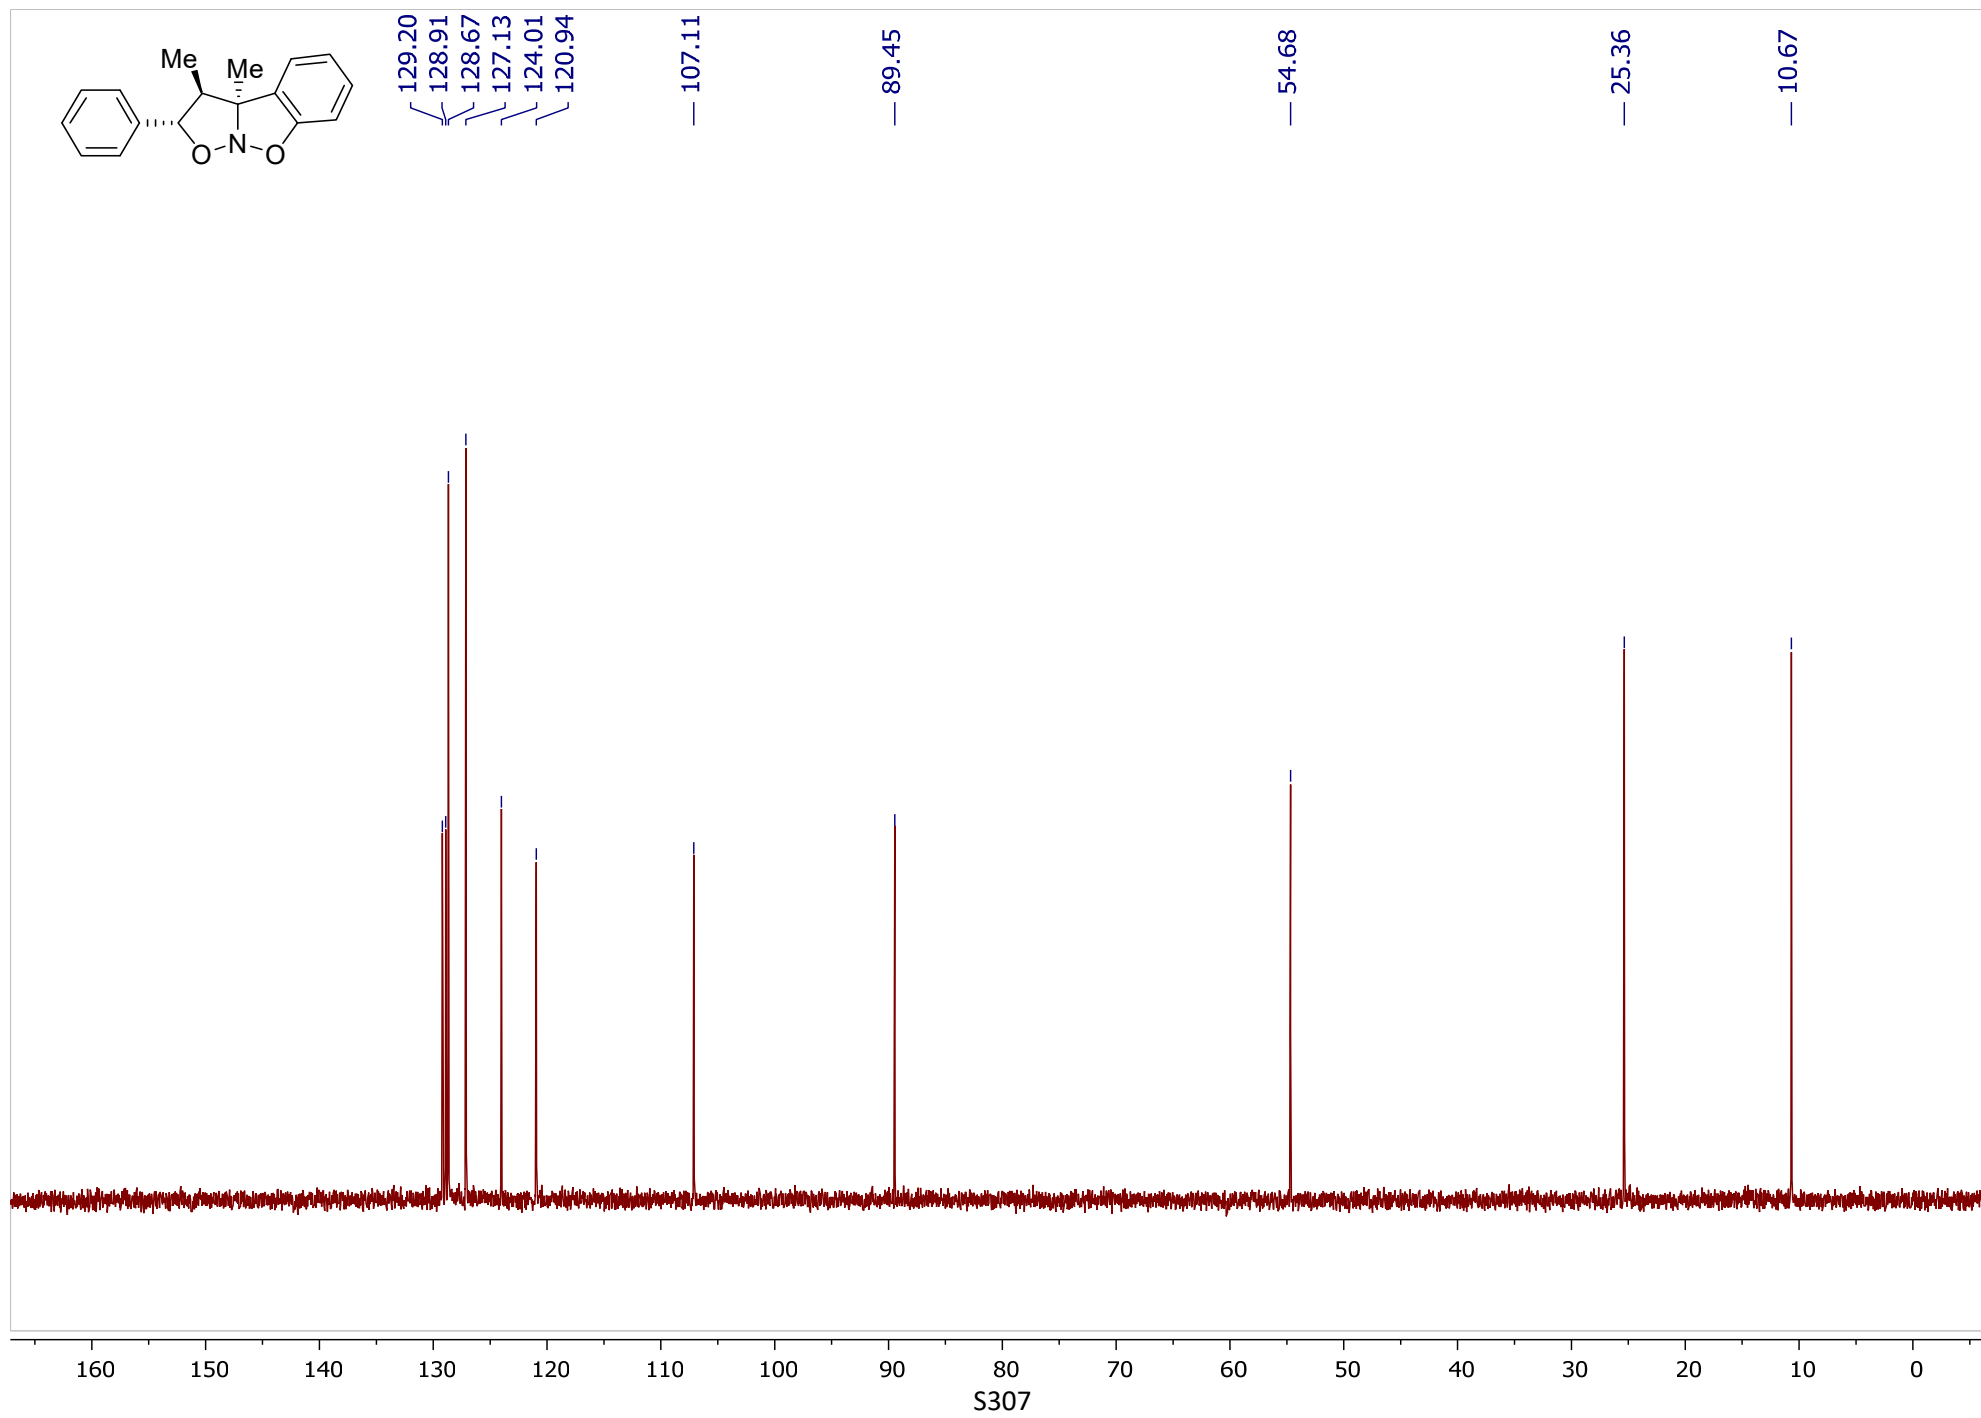

$^1\text{H}$ - $^1\text{H}$  COSY

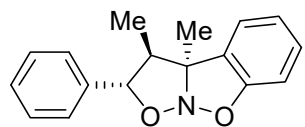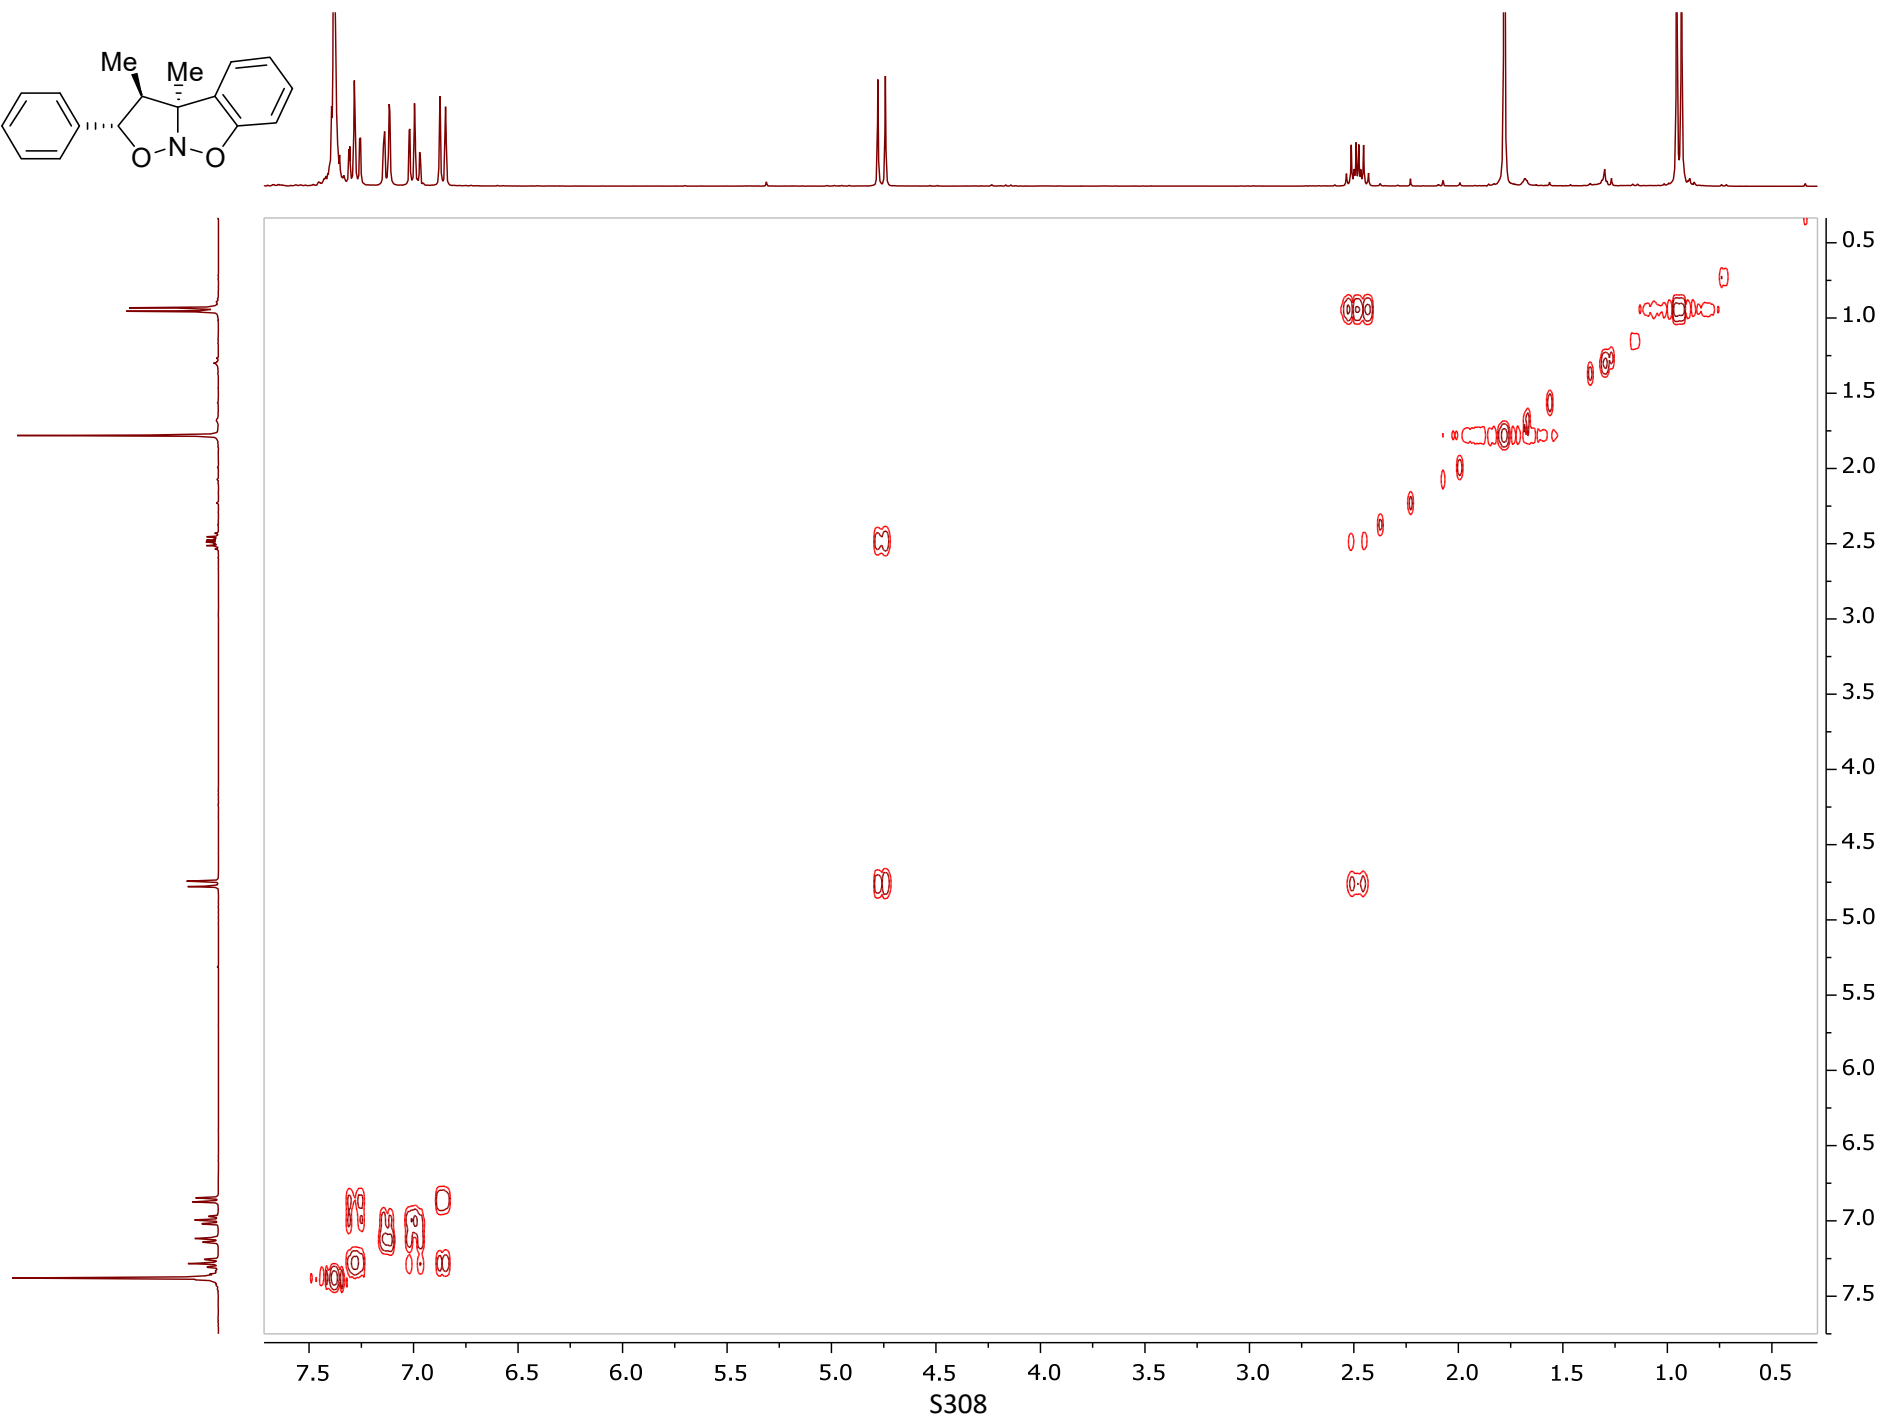

$^1\text{H}$ - $^{13}\text{C}$  HSQC

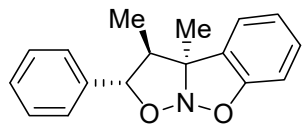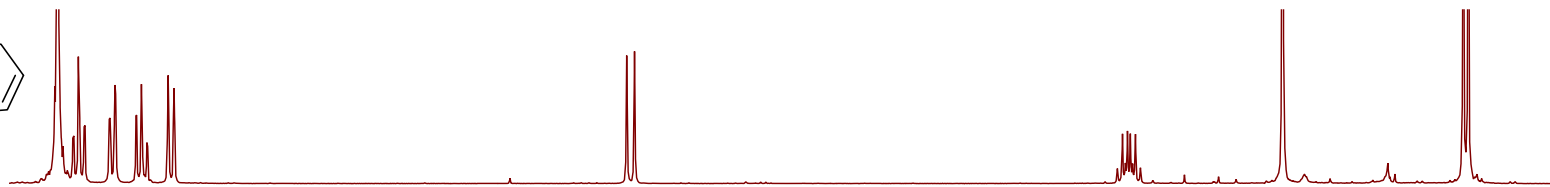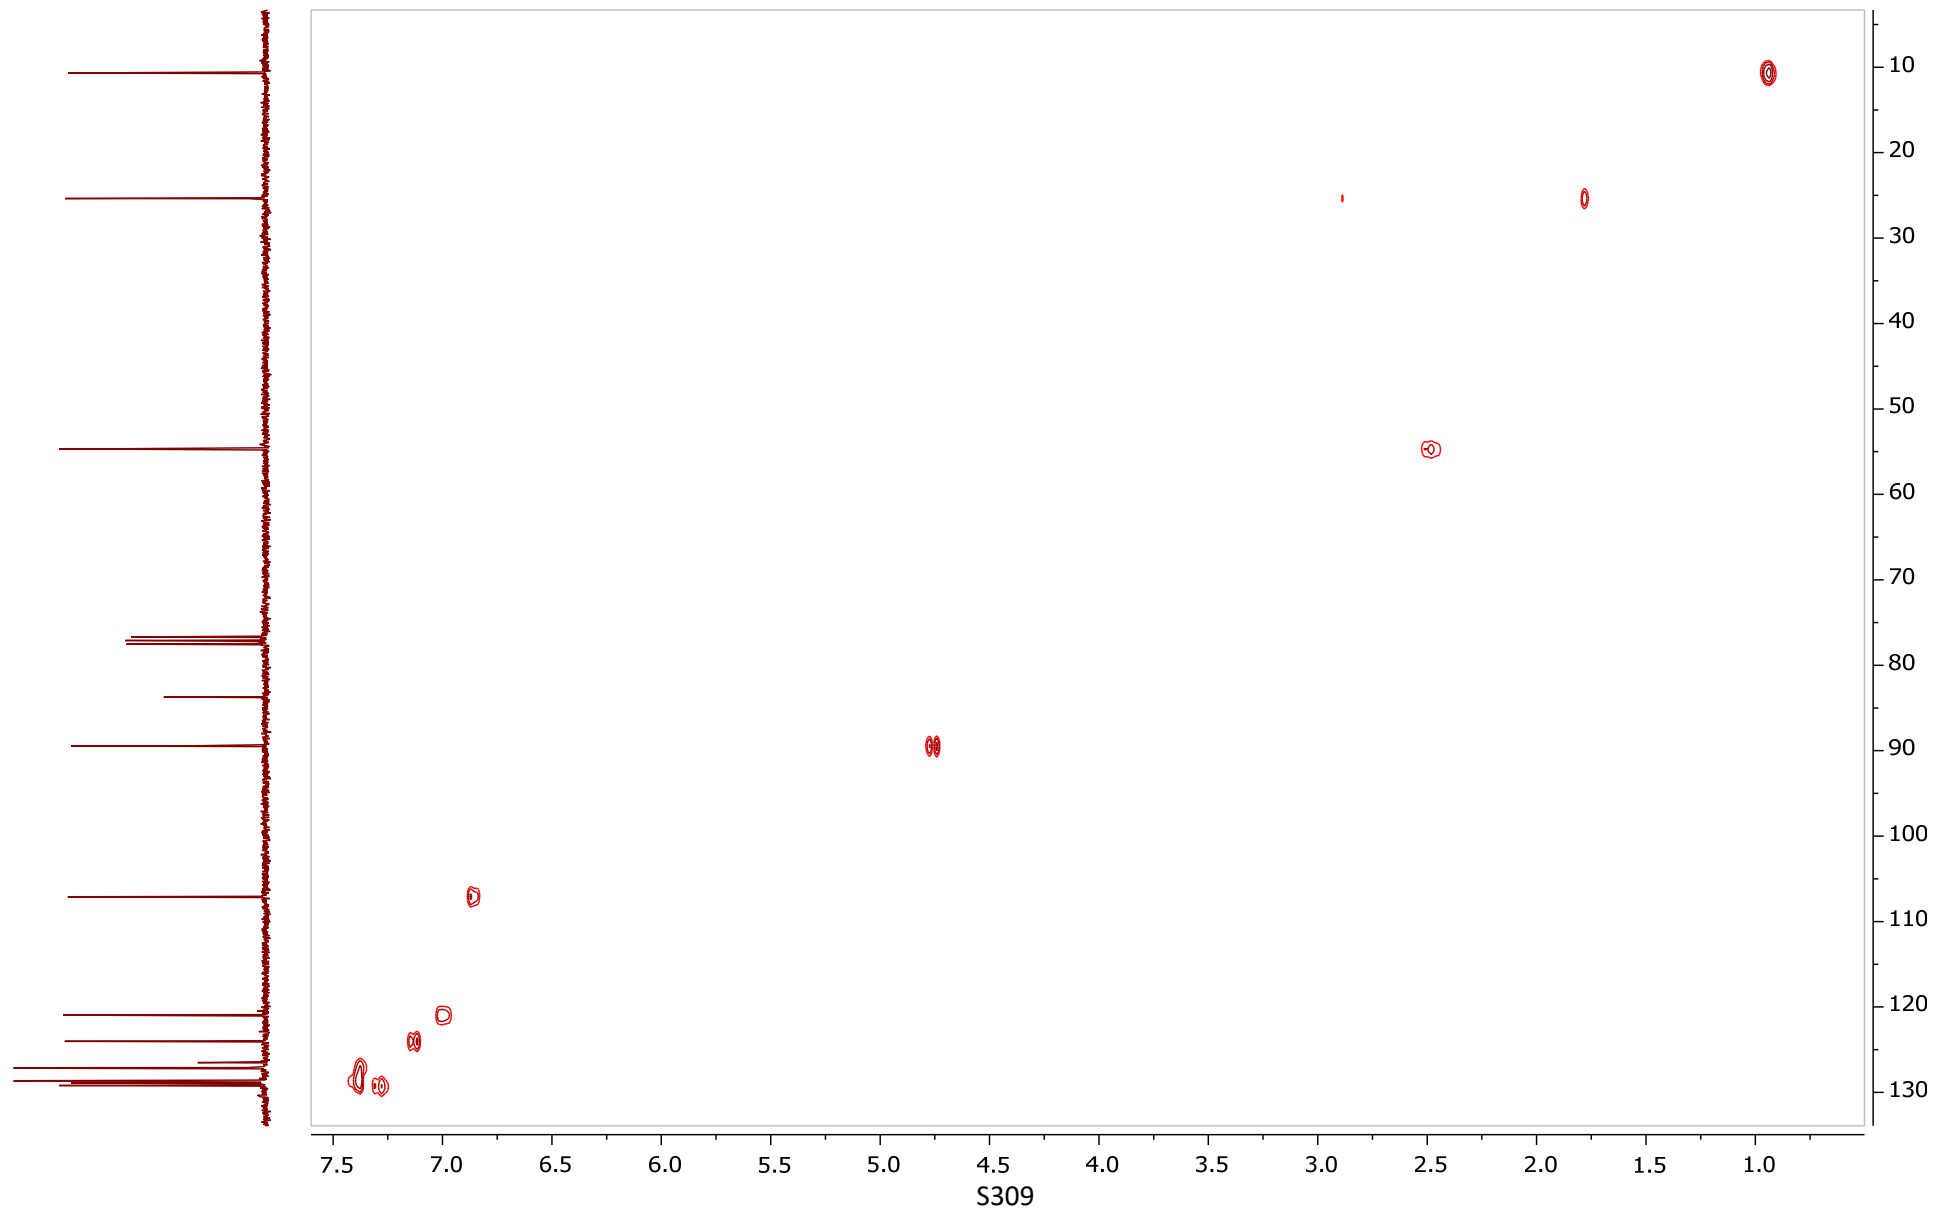

$^1\text{H}-^{13}\text{C}$  HMBC

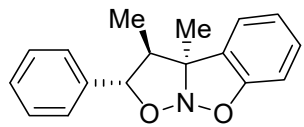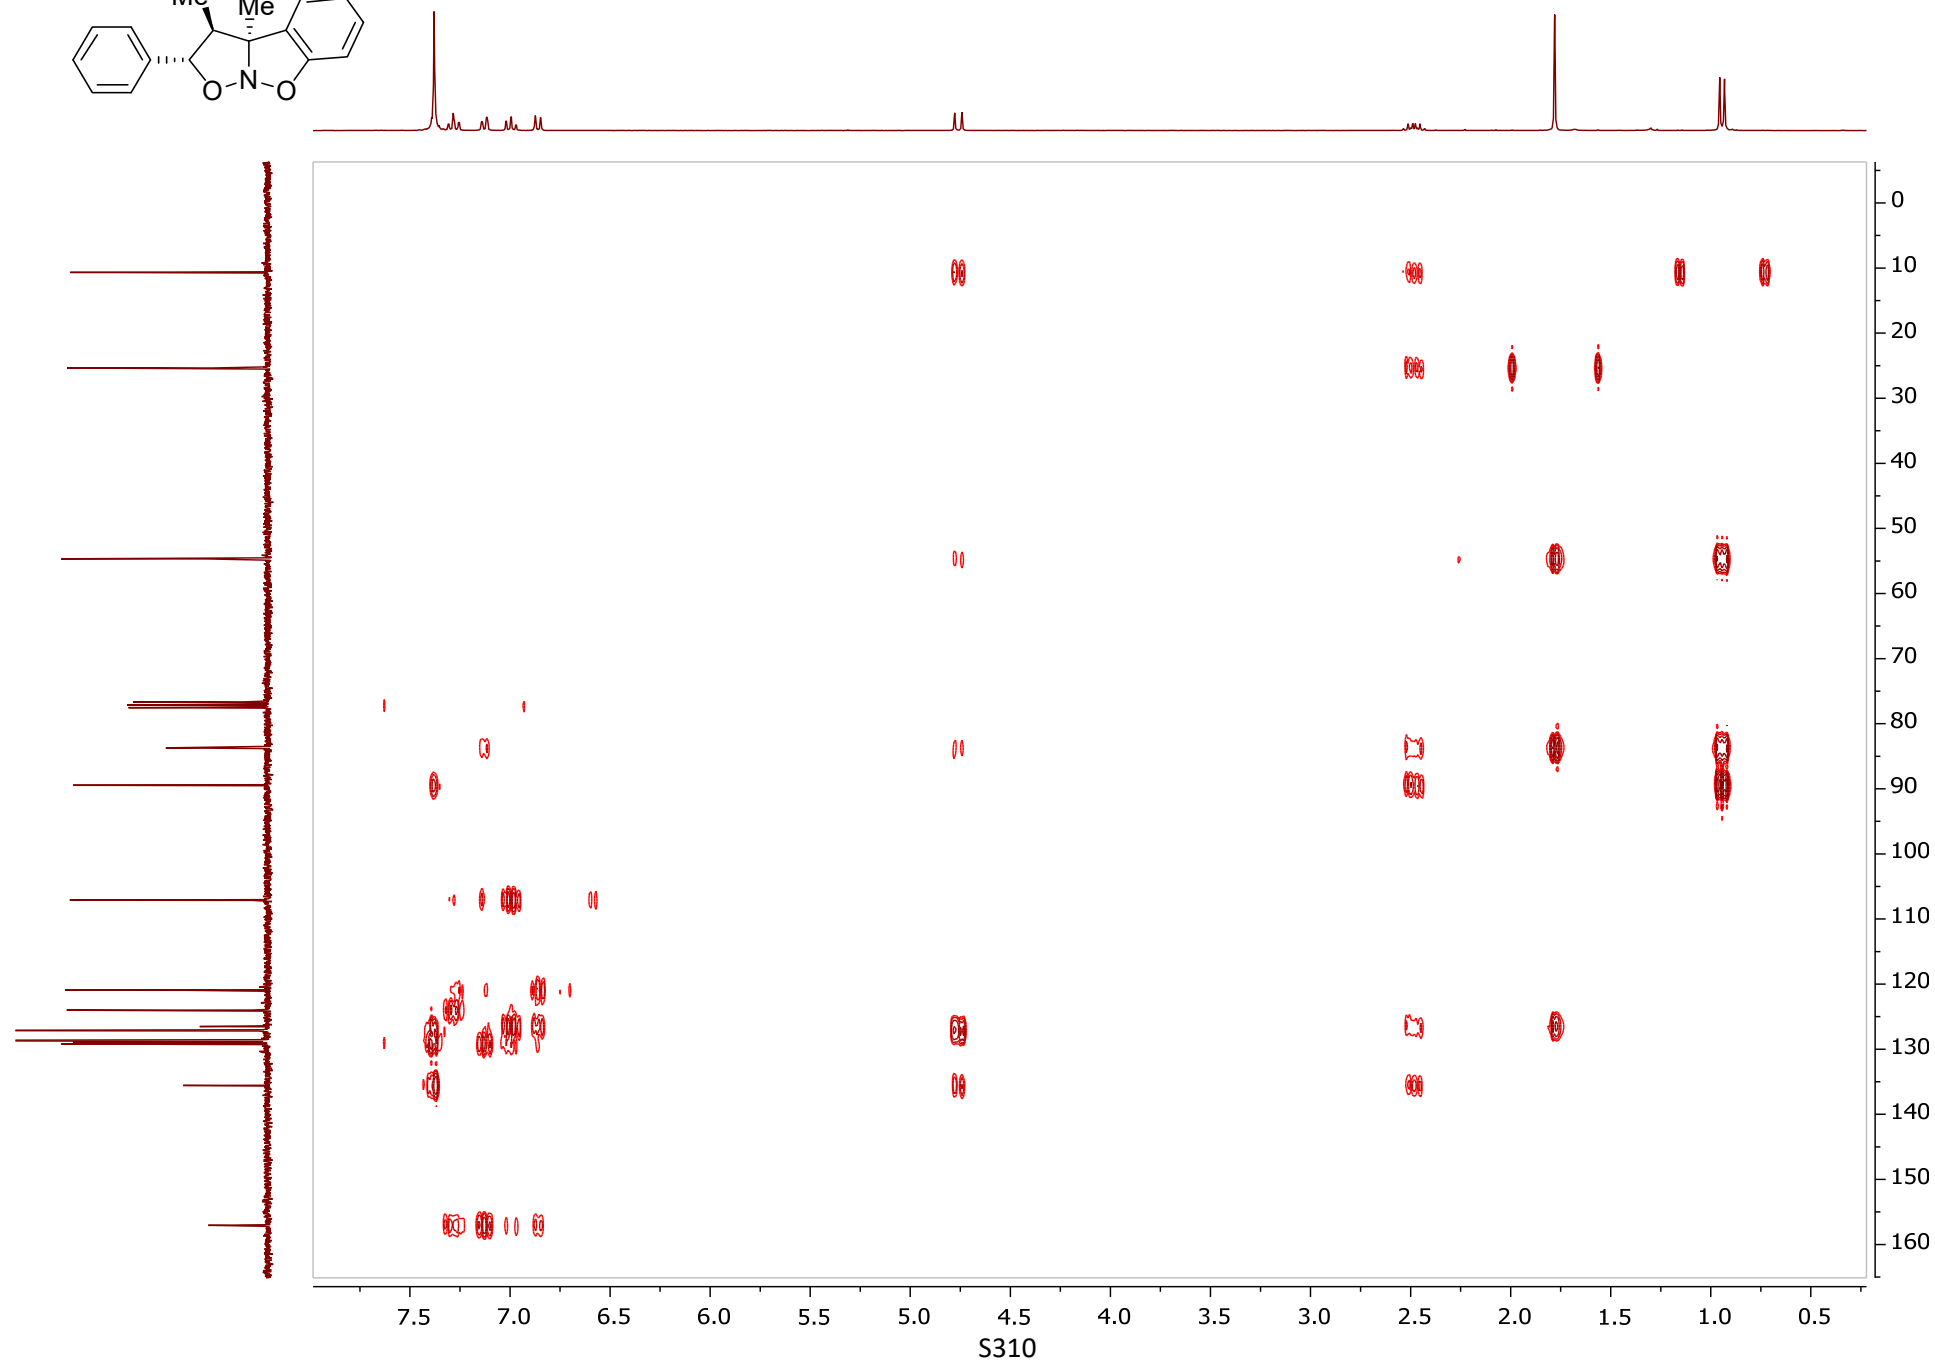

$^1\text{H}$ - $^1\text{H}$  NOESY

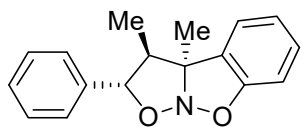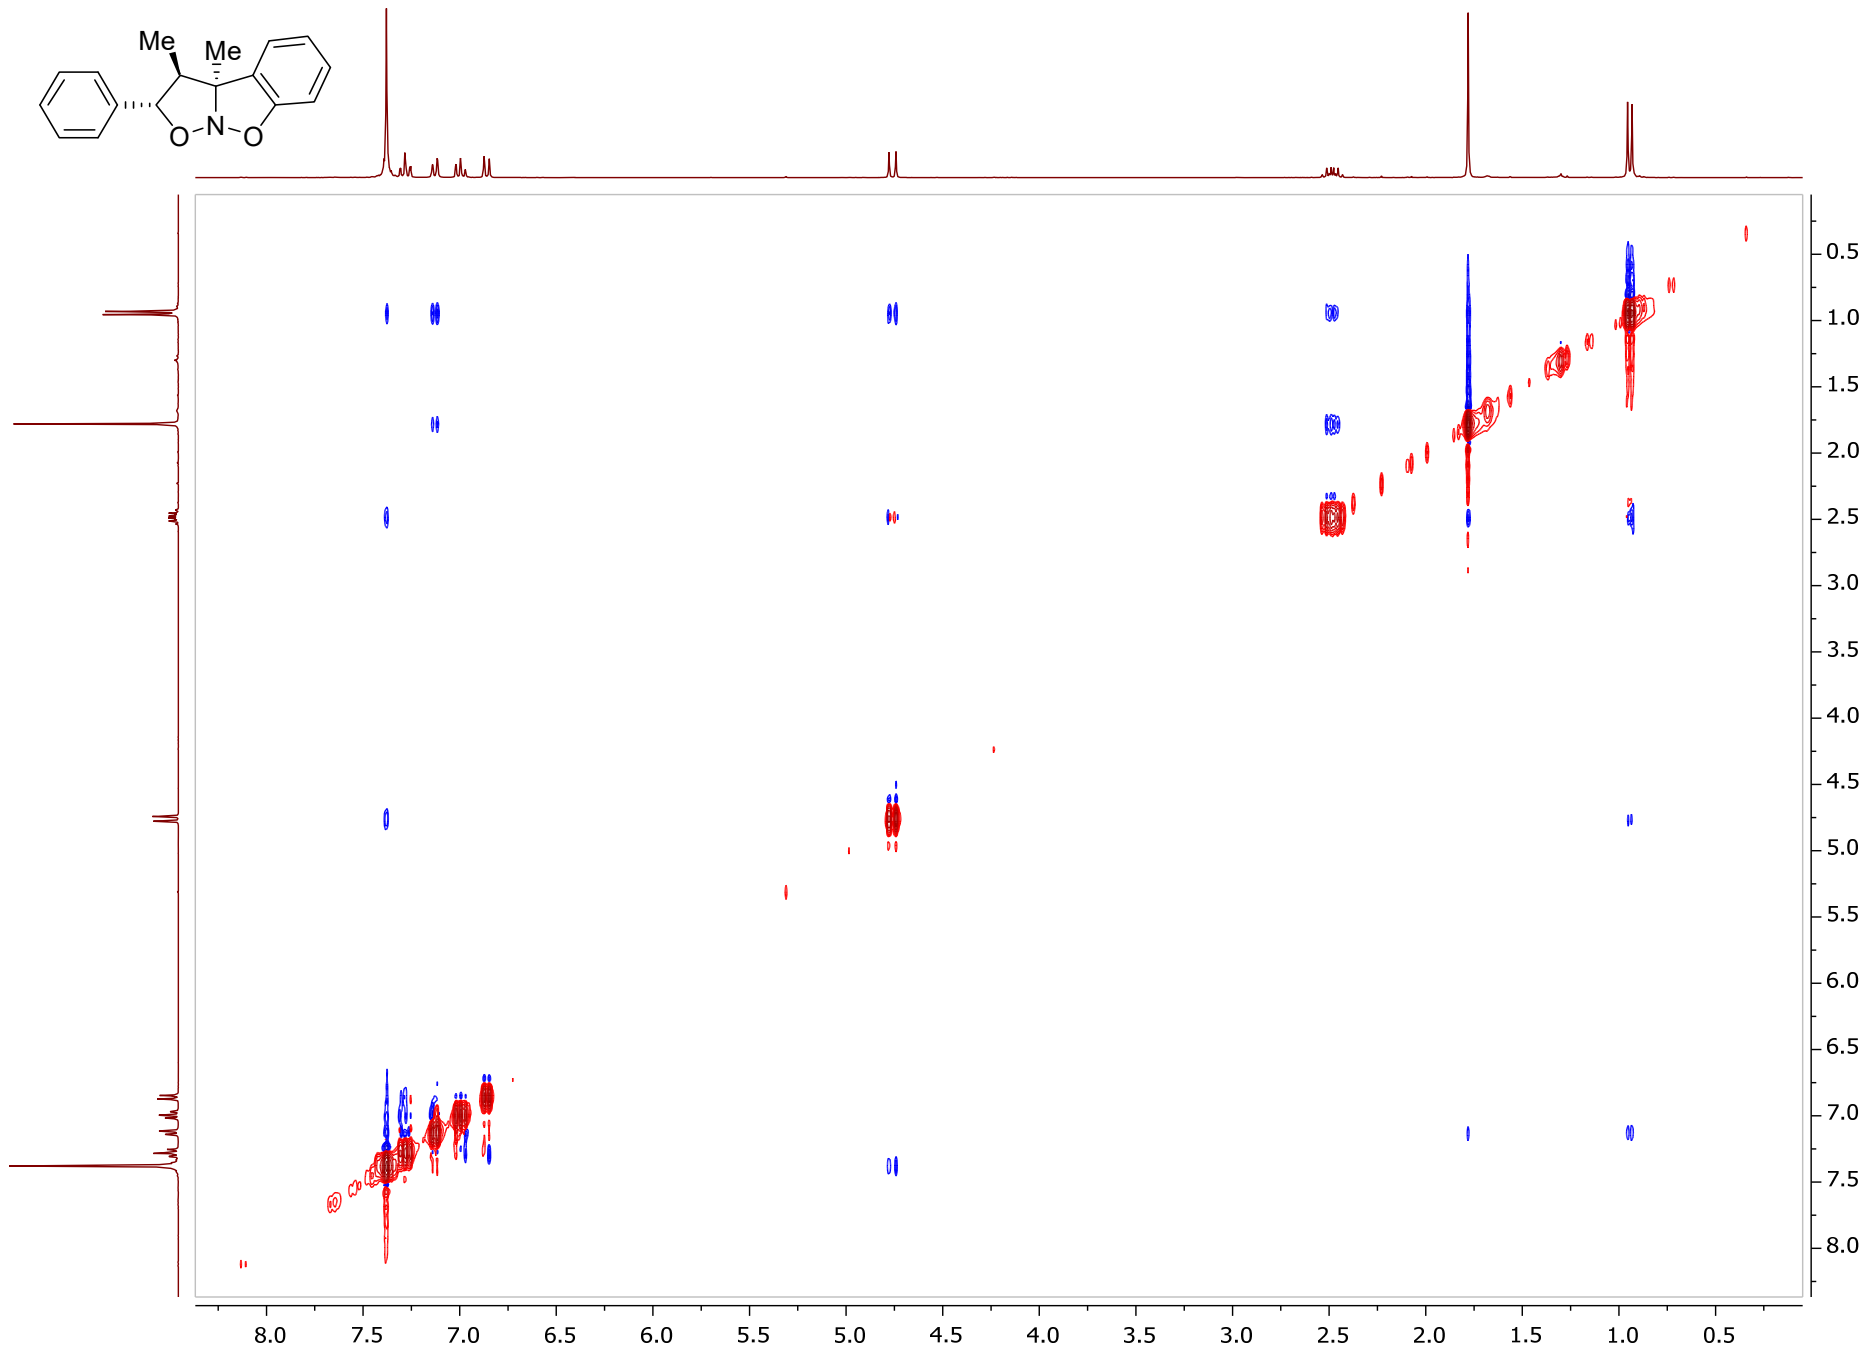

(2*S*\*,3*S*\*,3*aS*\*)-3-(4-Methoxyphenyl)-3*a*-methyl-2-phenyl-3,3*a*-dihydro-2*H*-benzo[*d*]isoxazolo[2,3-*b*]isoxazole 6ia

<sup>1</sup>H NMR (300 MHz, CDCl<sub>3</sub>)

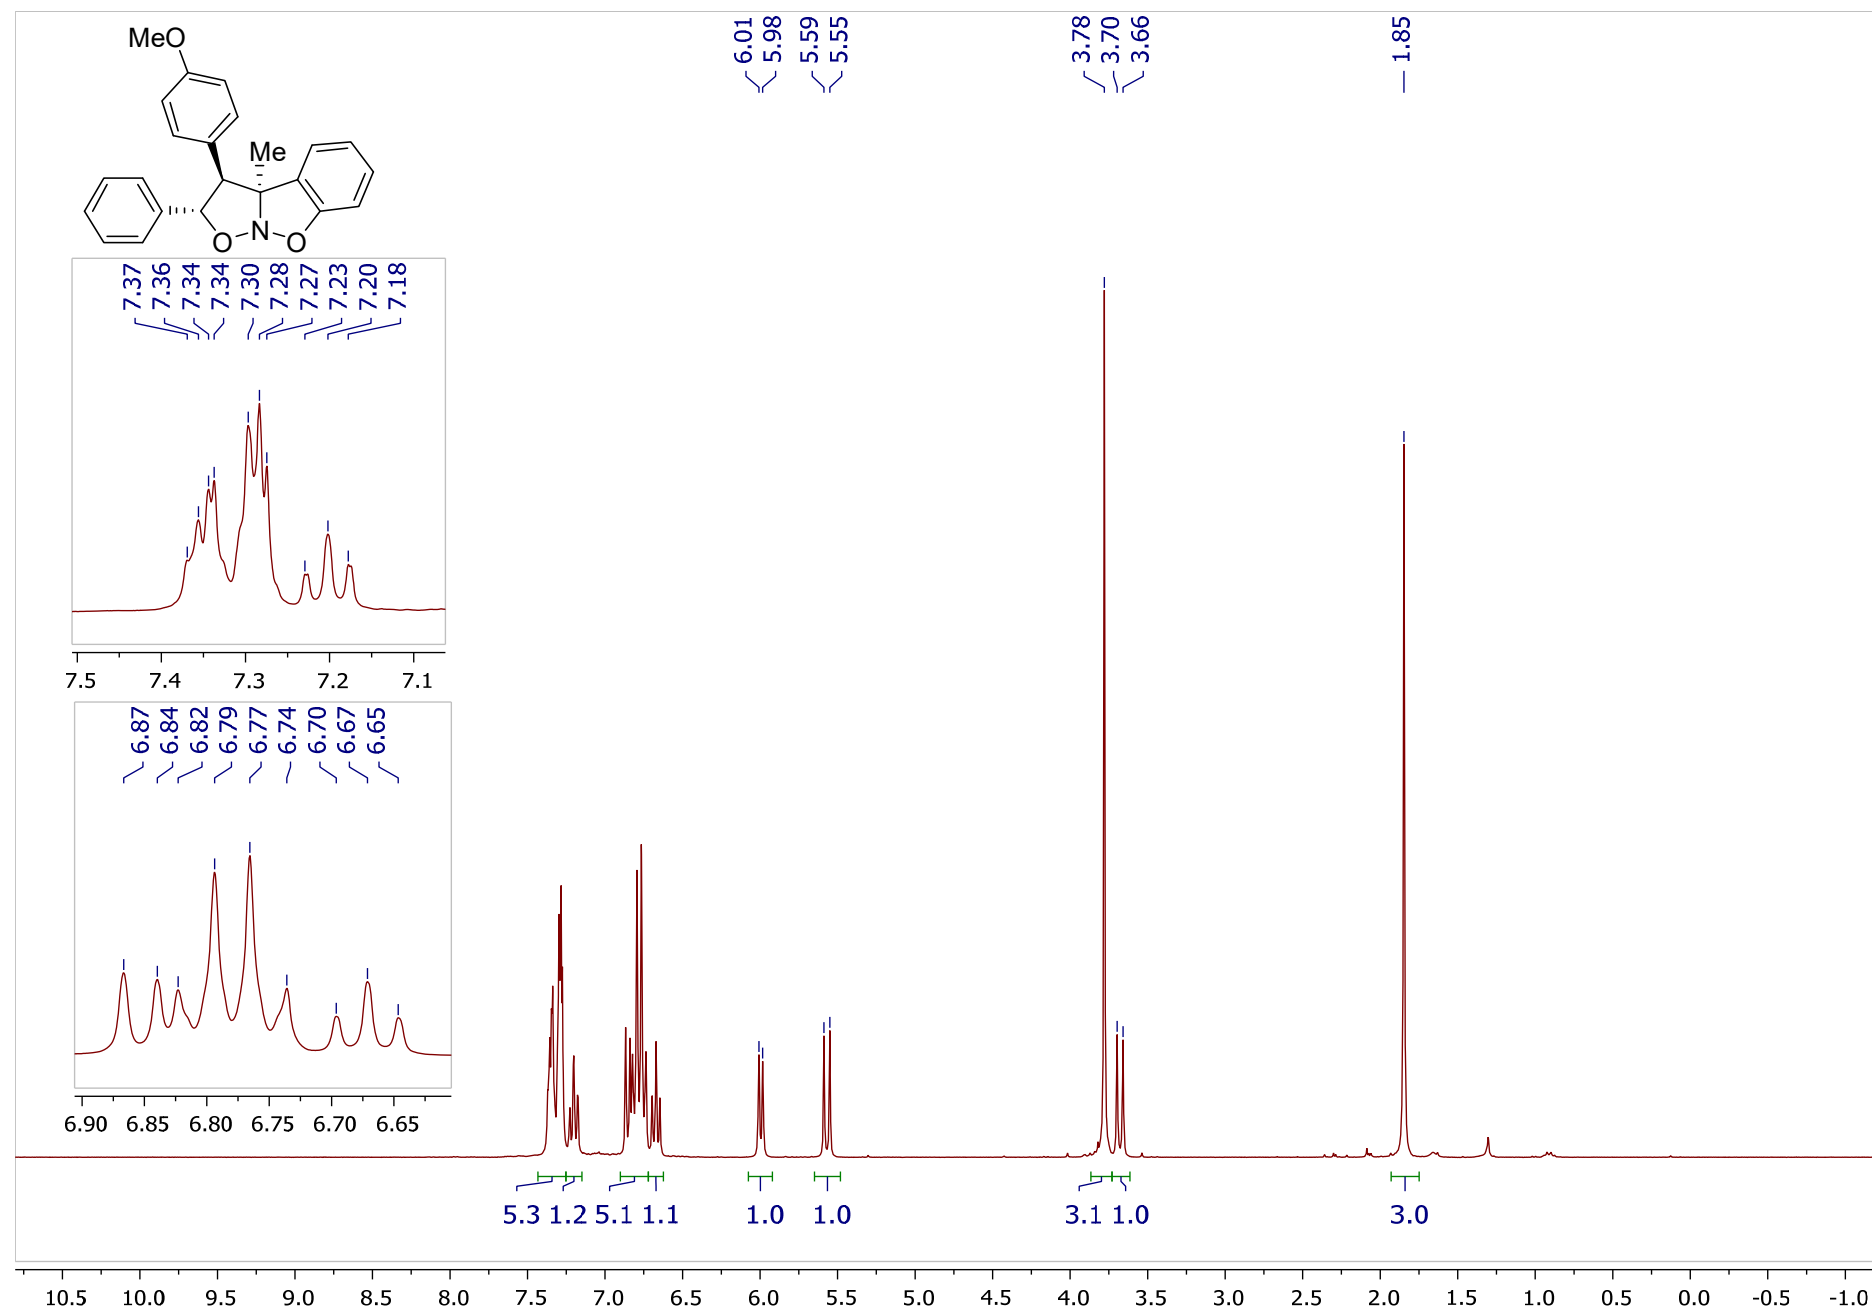



<sup>13</sup>C NMR (75 MHz, CDCl<sub>3</sub>)

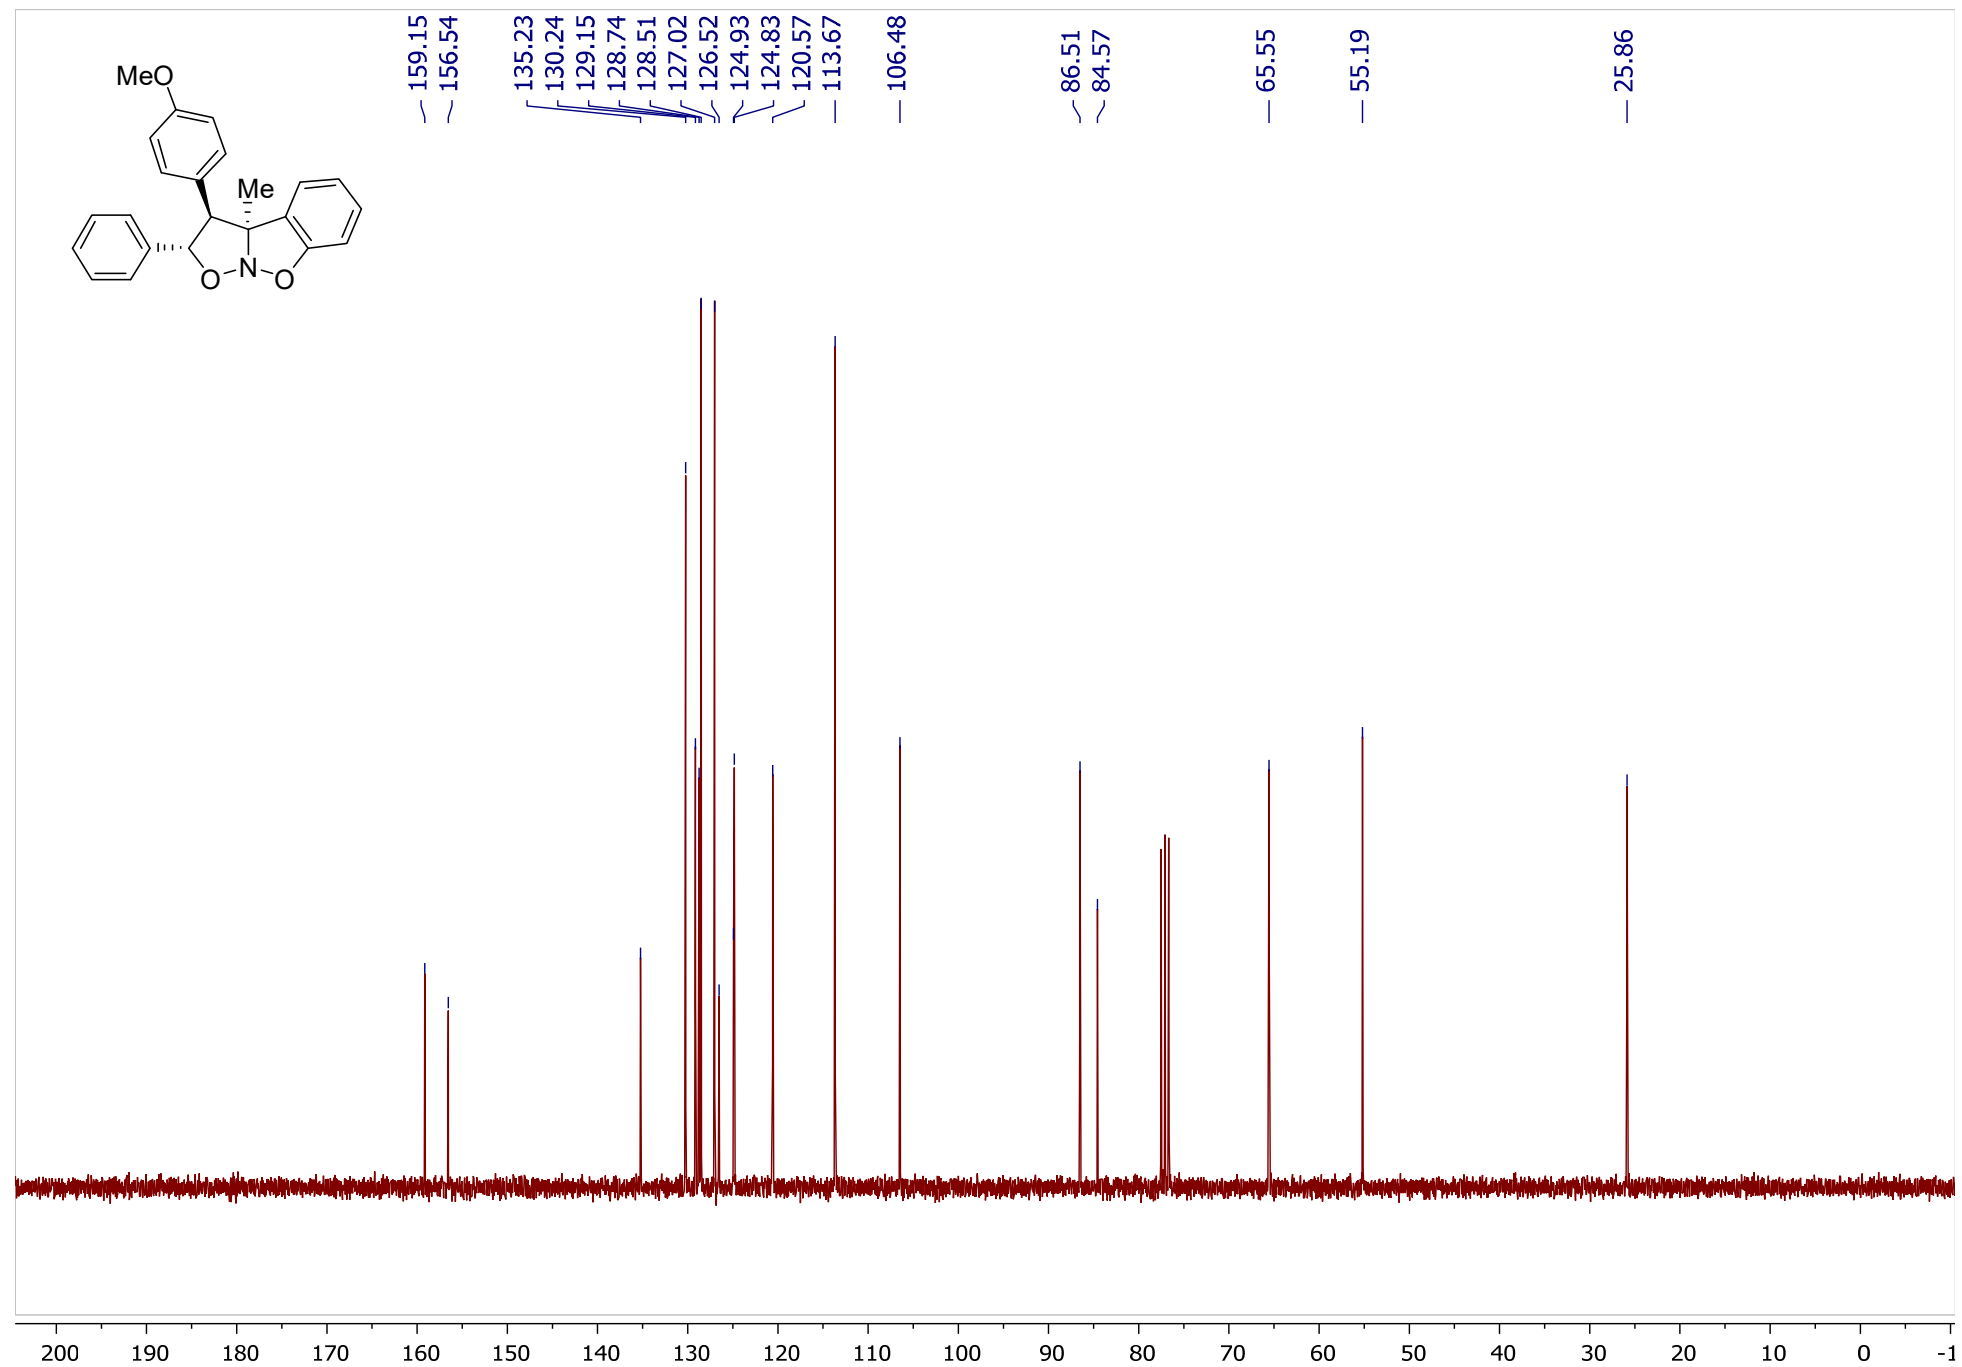

$^{13}\text{C}$  DEPT 135 (75 MHz,  $\text{CDCl}_3$ )

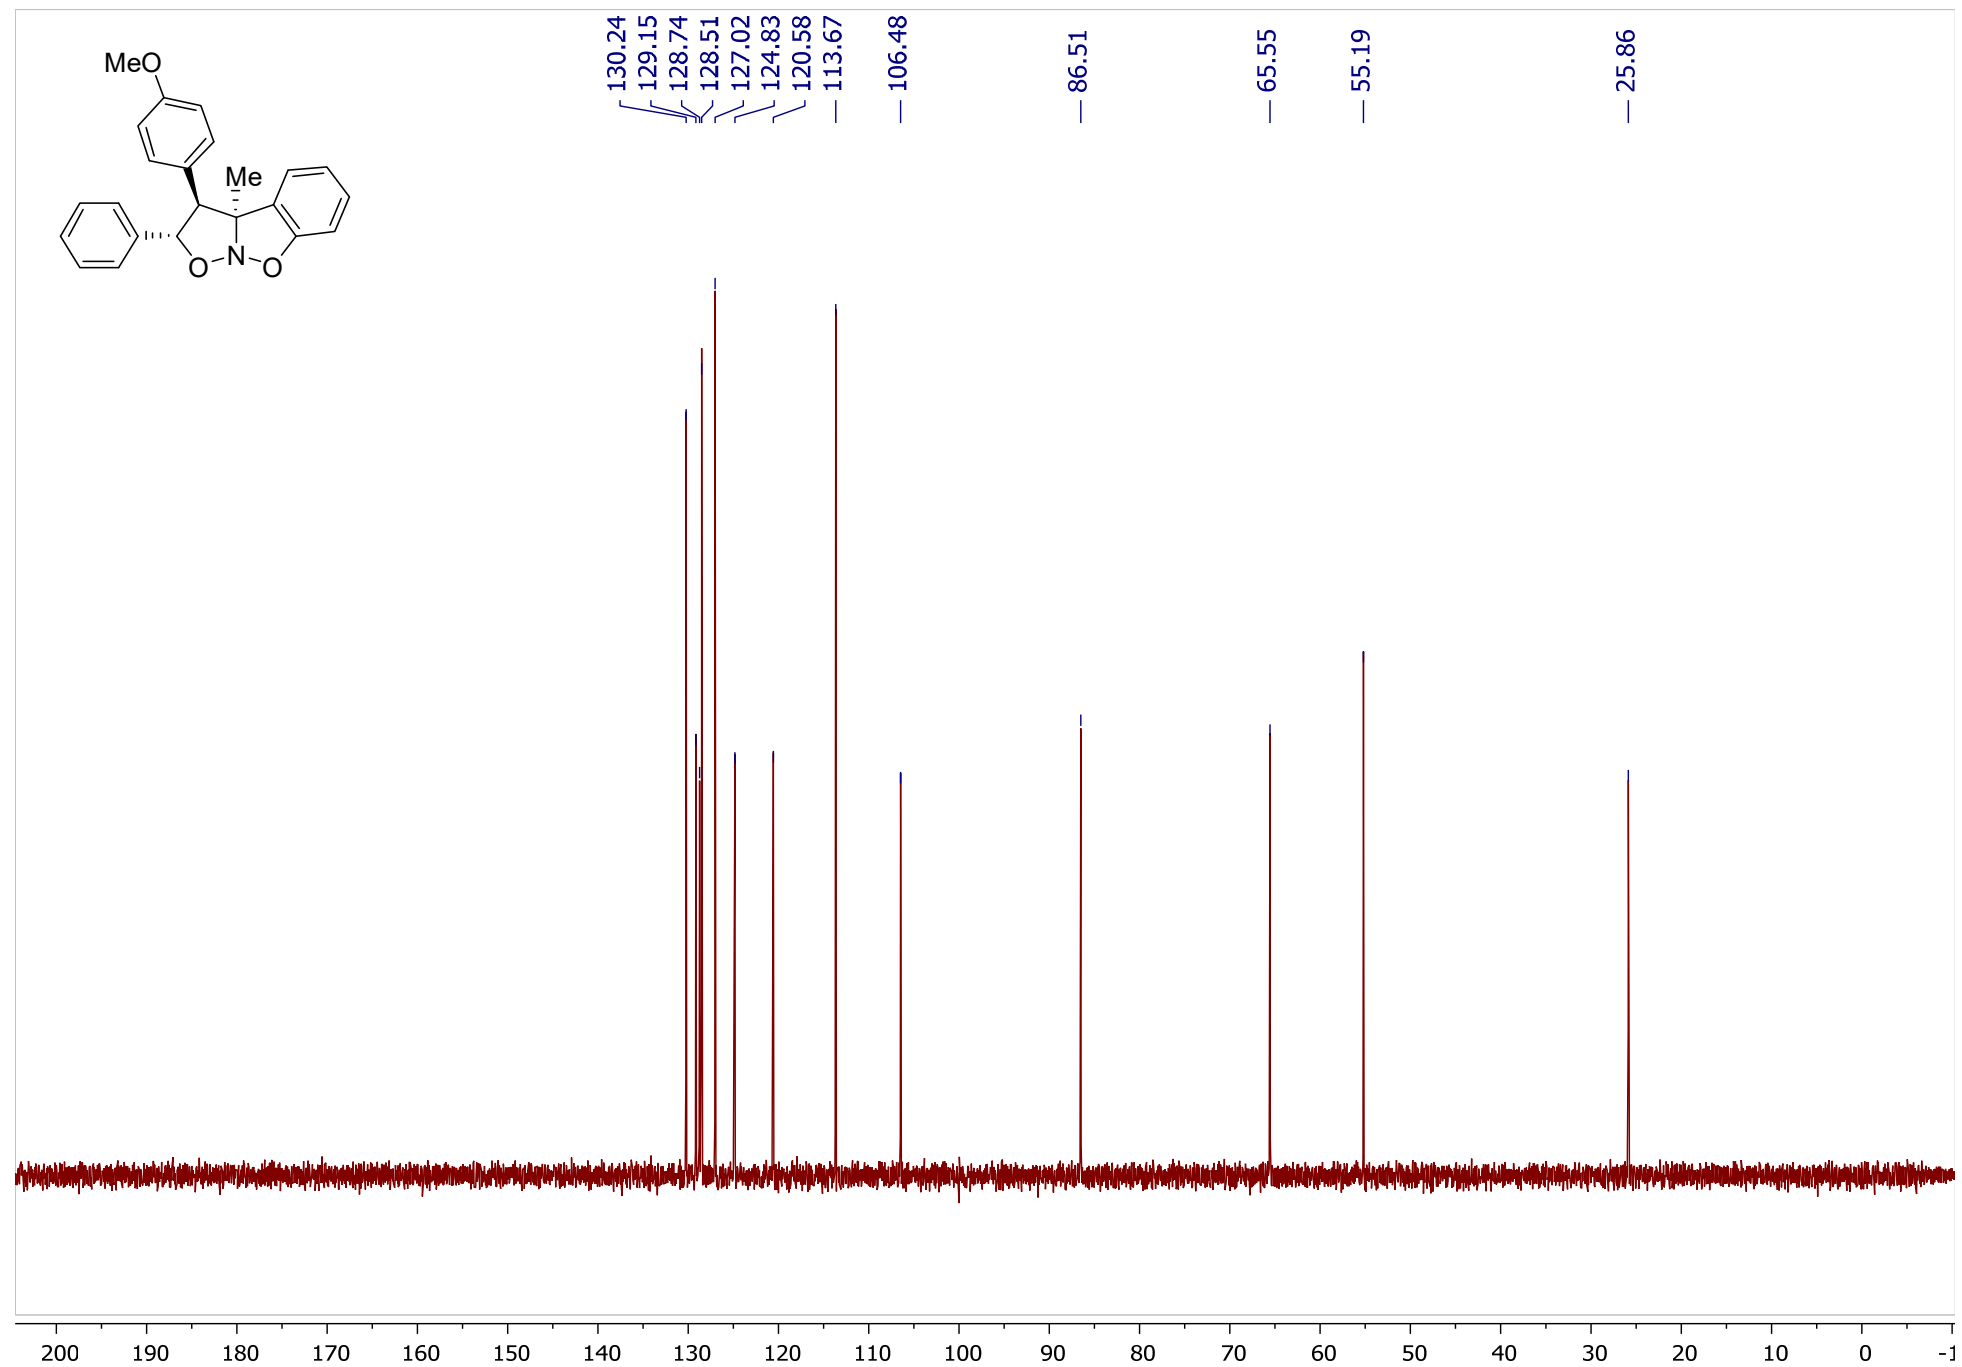

$^1\text{H}$ - $^1\text{H}$  COSY

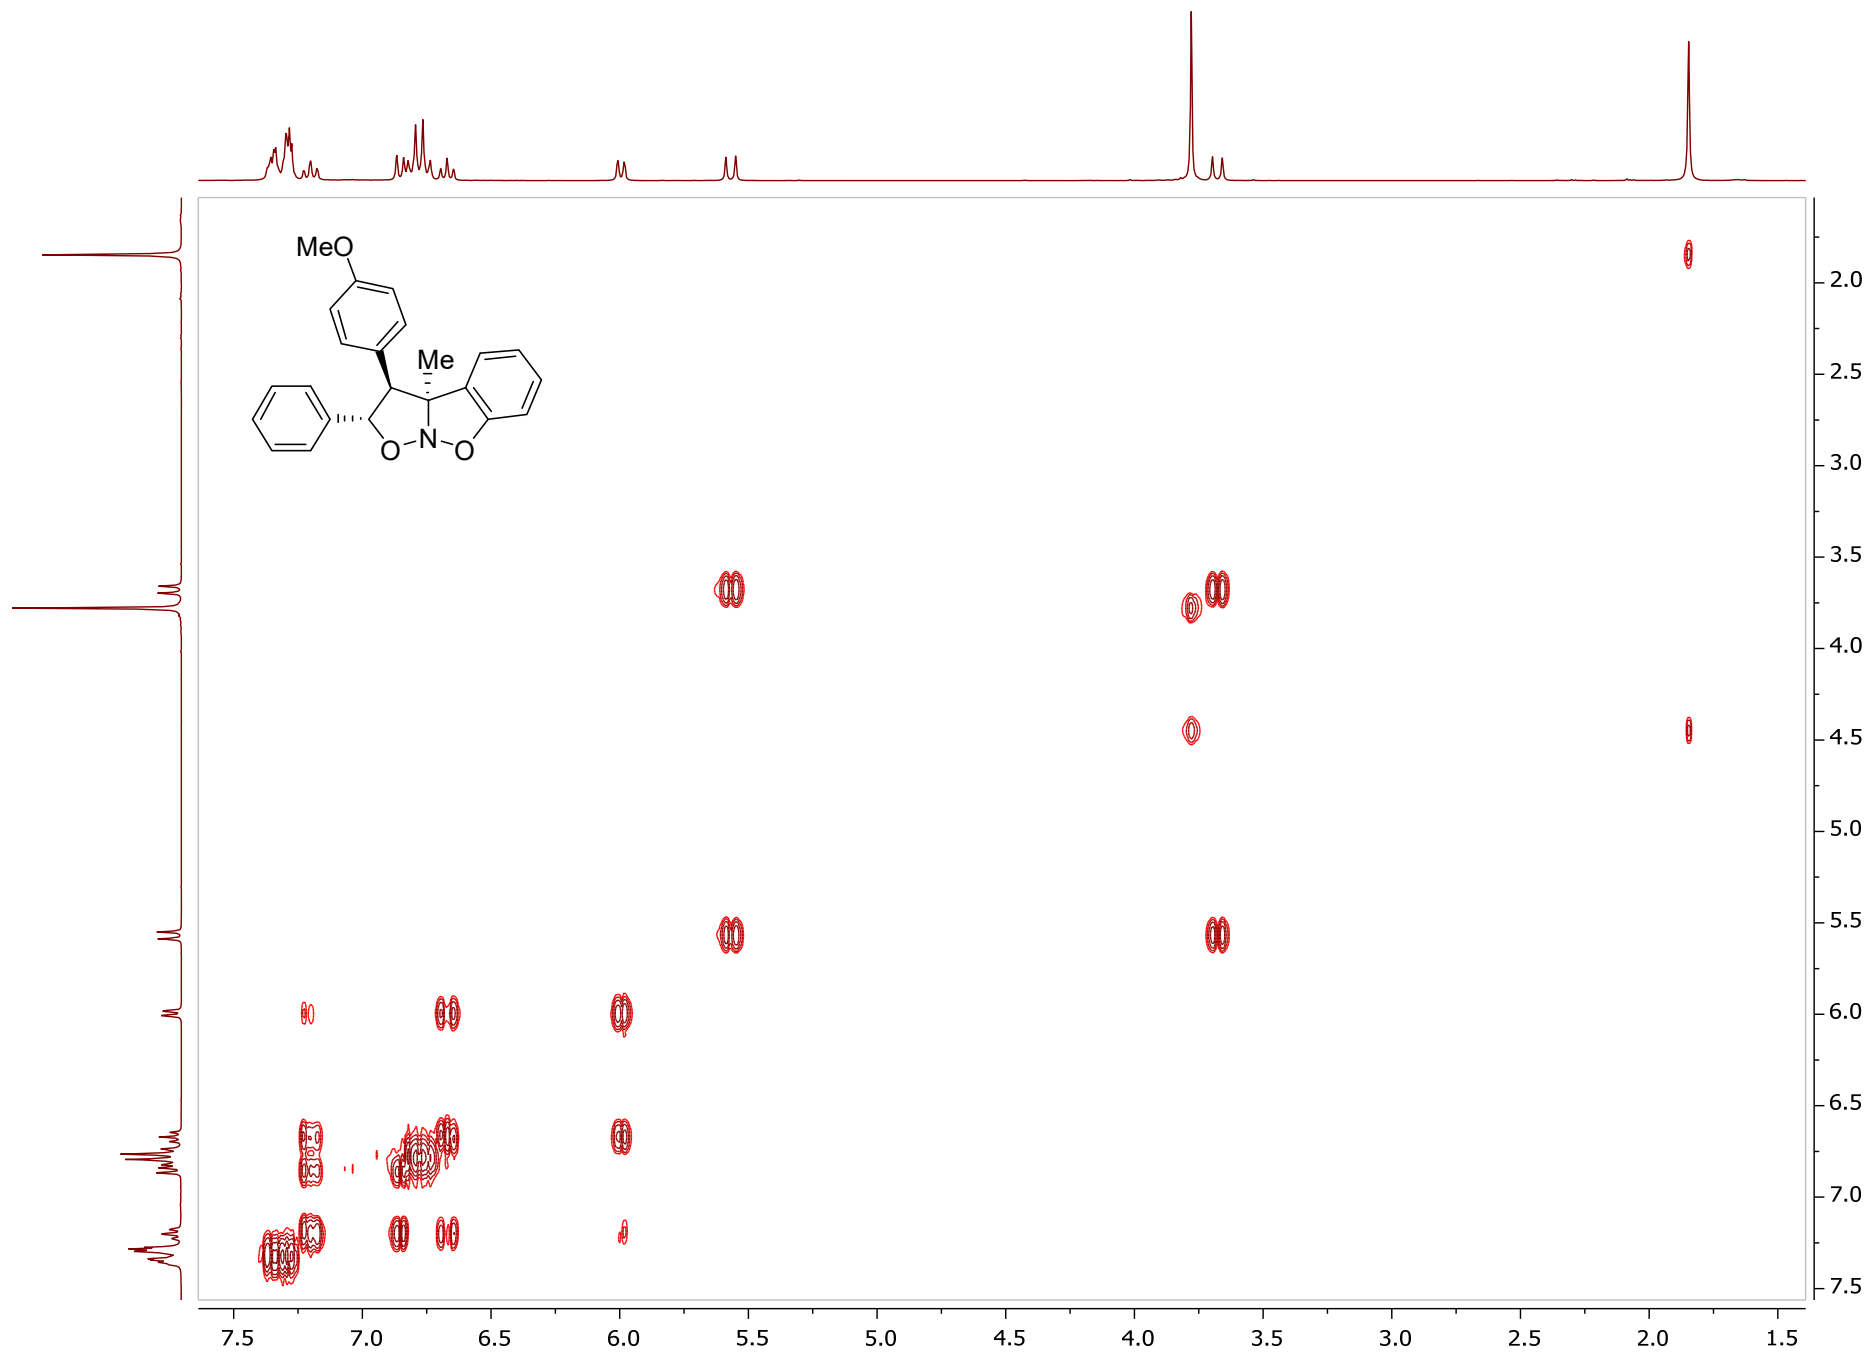

S315

$^1\text{H}$ - $^{13}\text{C}$  HSQC

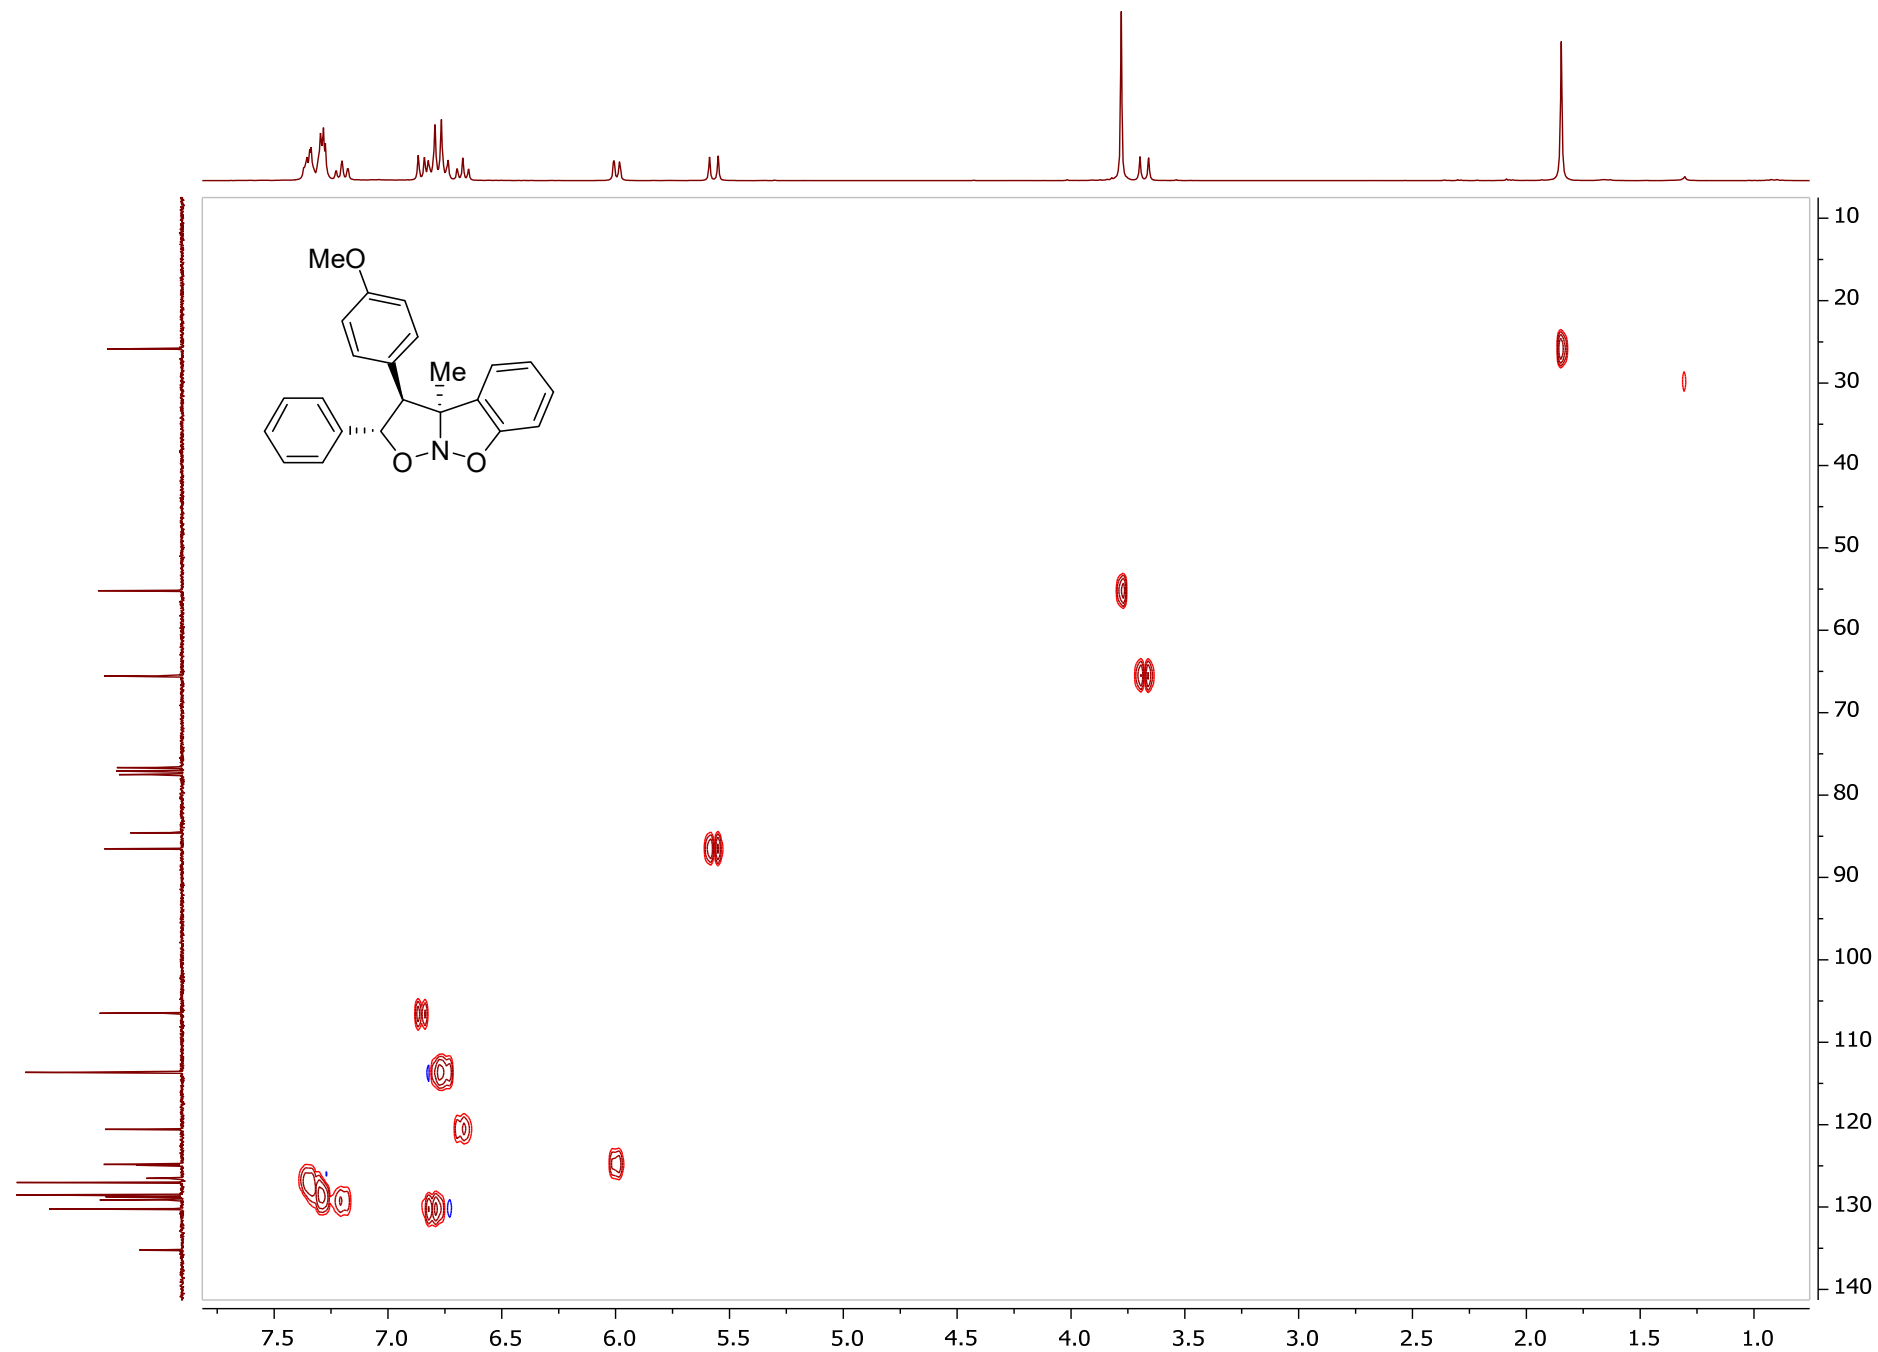

$^1\text{H}$ - $^{13}\text{C}$  HMBC

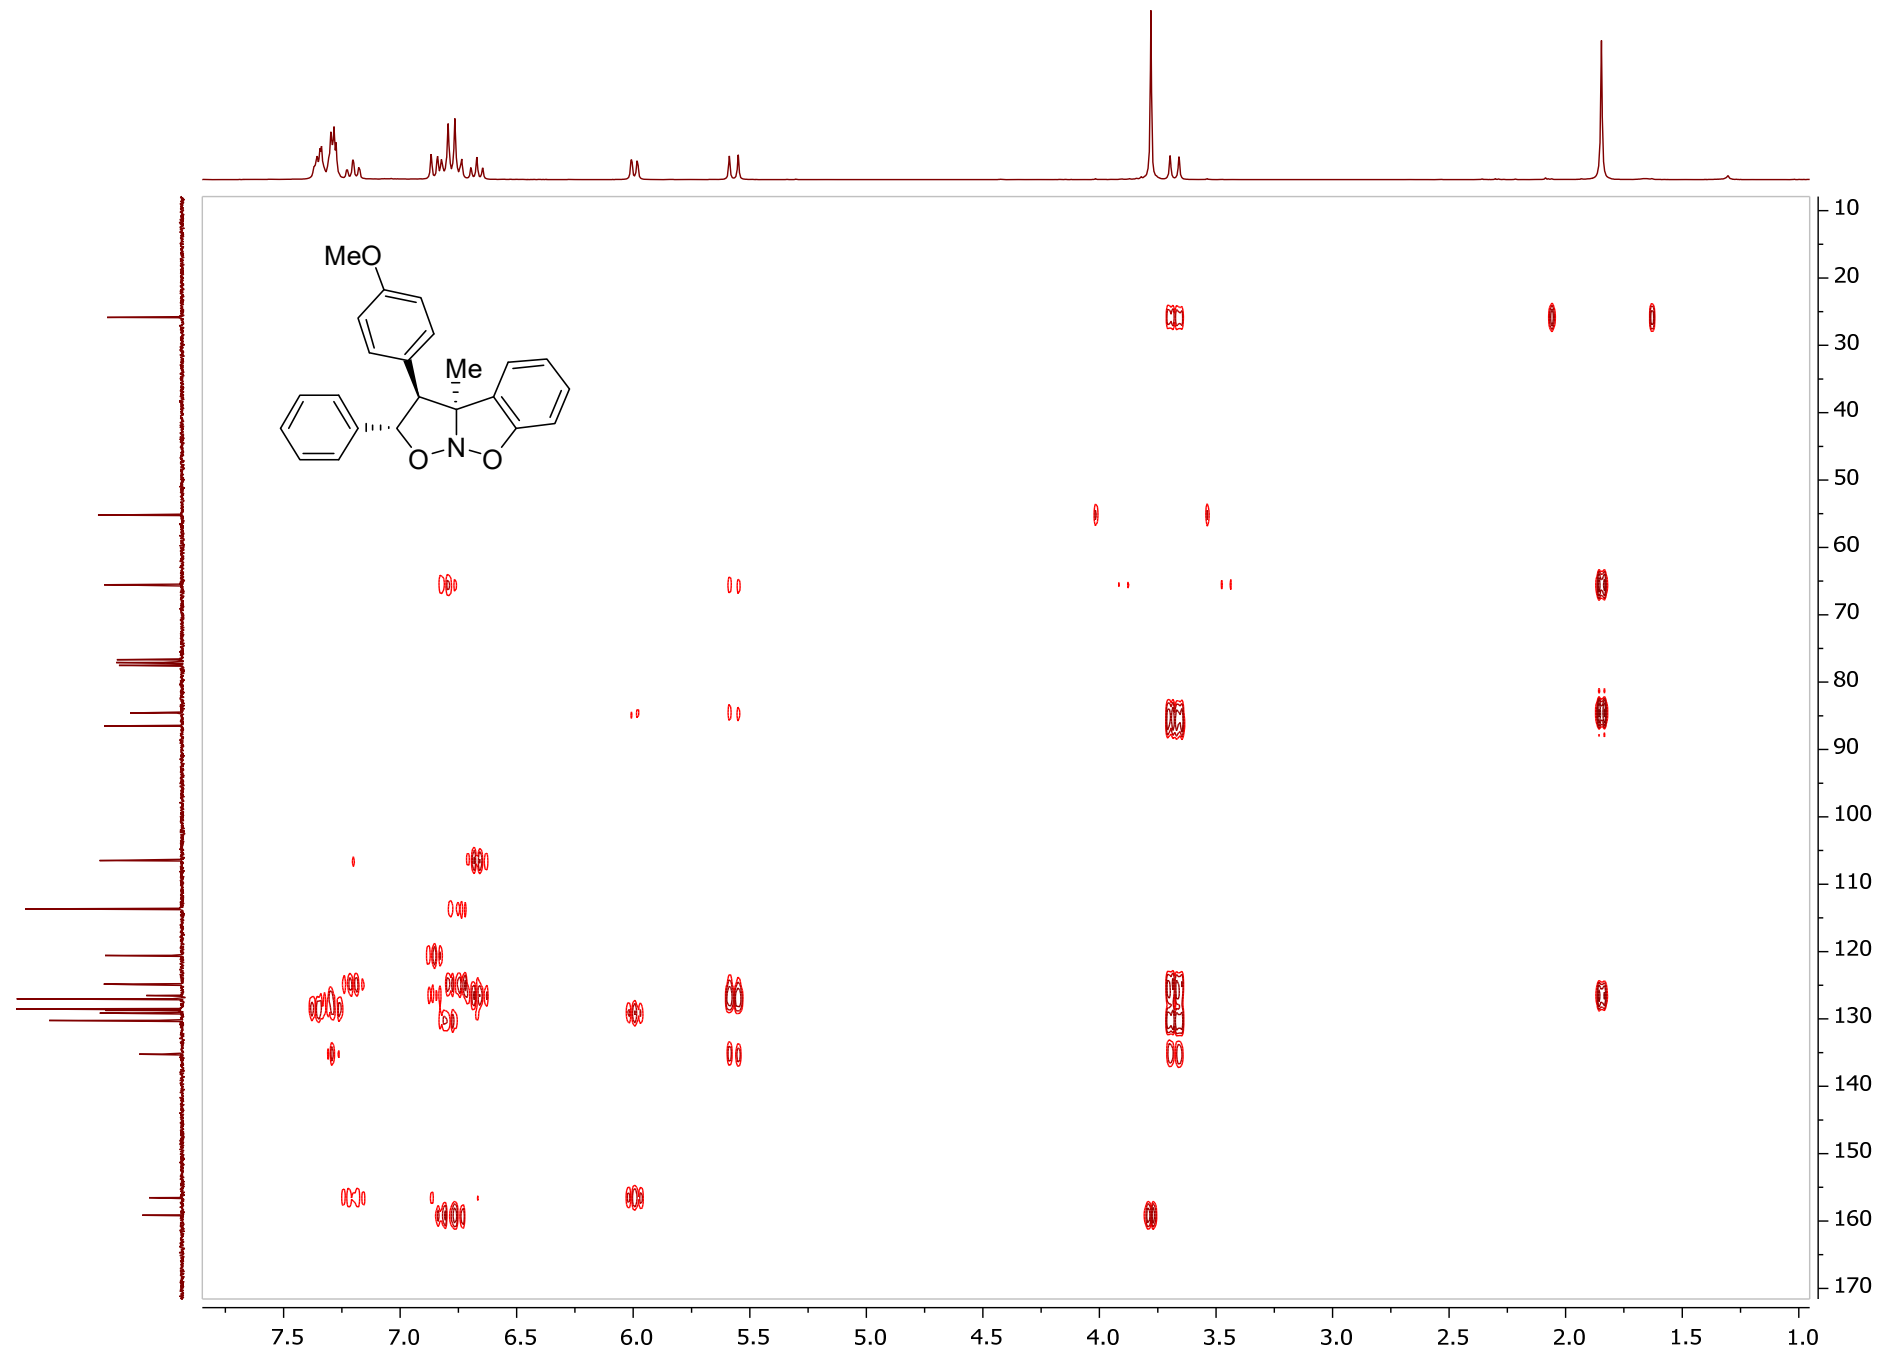

S317

$^1\text{H}$ - $^1\text{H}$  NOESY

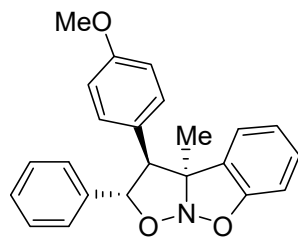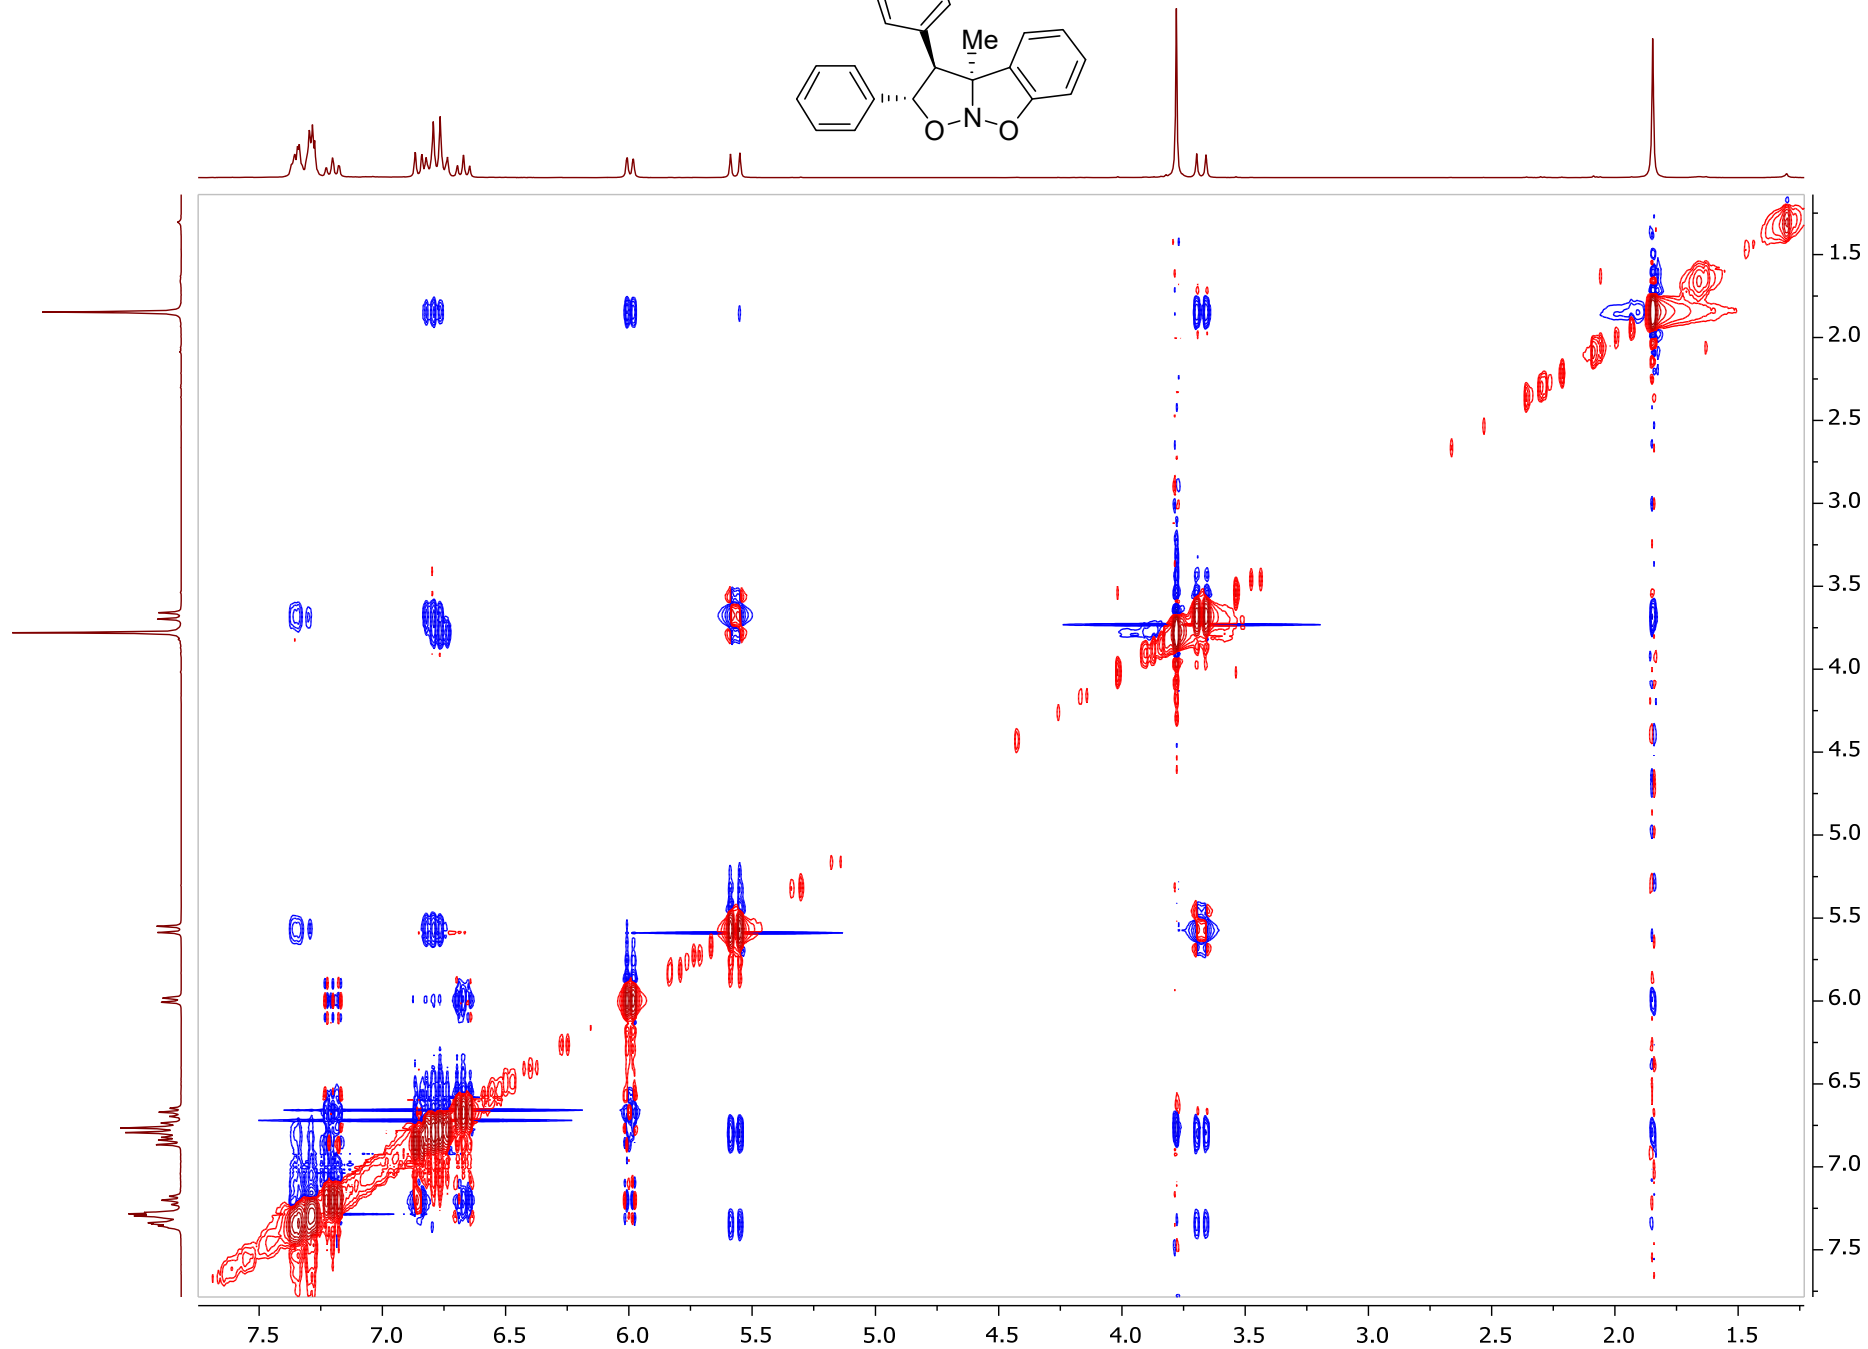

S318

Diethyl (3*S*\*,3*aR*\*)-4-methoxy-3-(4-methoxyphenyl)-3*a*-methyl-3,3*a*-dihydro-2*H*-benzo[*d*]isoxazolo[2,3-*b*]isoxazole-2,2-dicarboxylate 6ab

<sup>1</sup>H NMR (300 MHz, CDCl<sub>3</sub>)

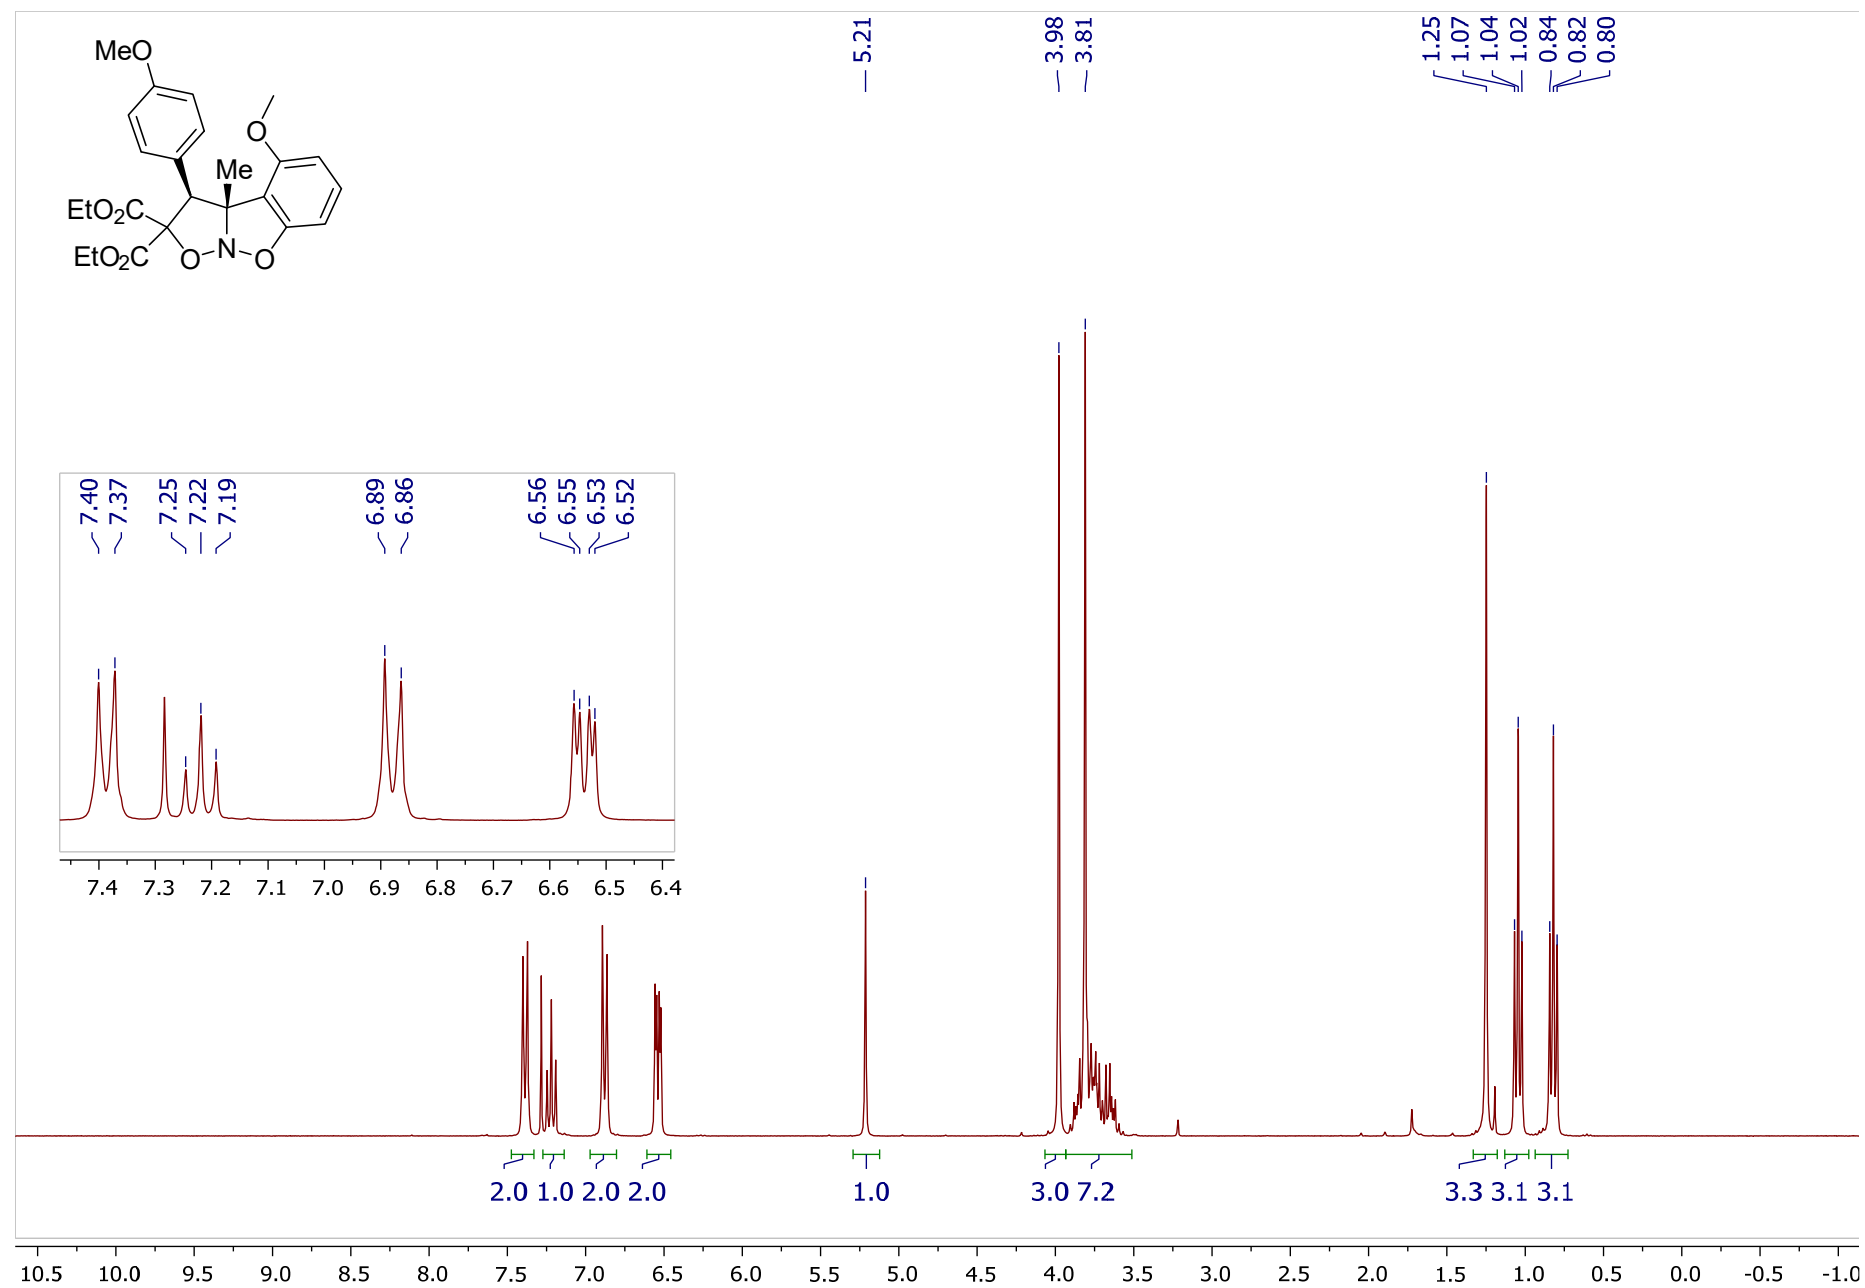

$^{13}\text{C}$  NMR (75 MHz,  $\text{CDCl}_3$ )

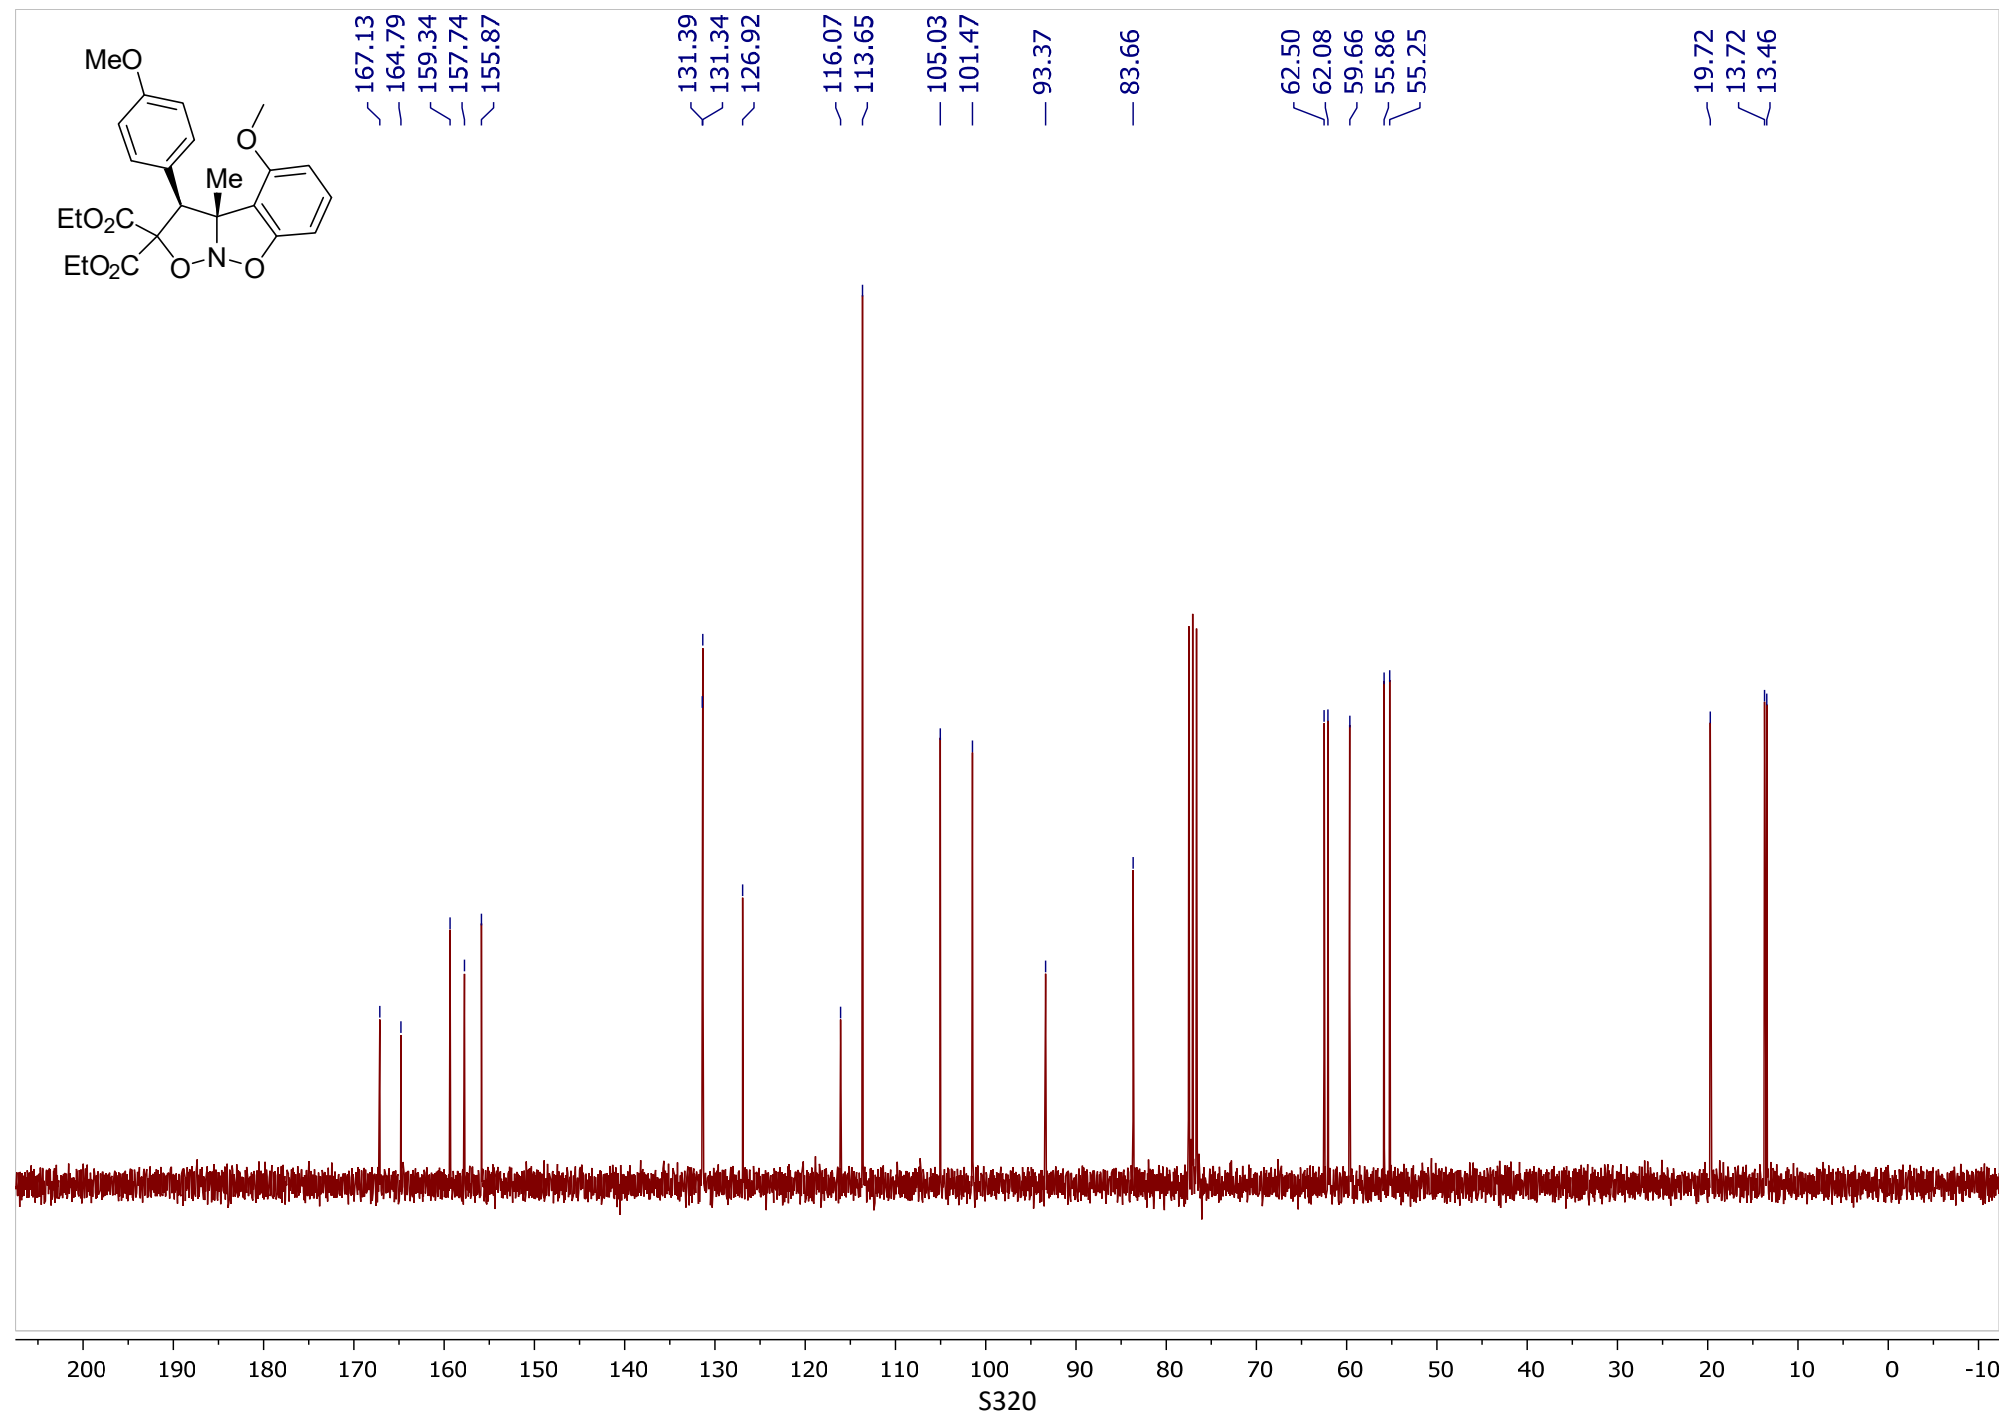



$^{13}\text{C}$  DEPT 135 (75 MHz,  $\text{CDCl}_3$ )

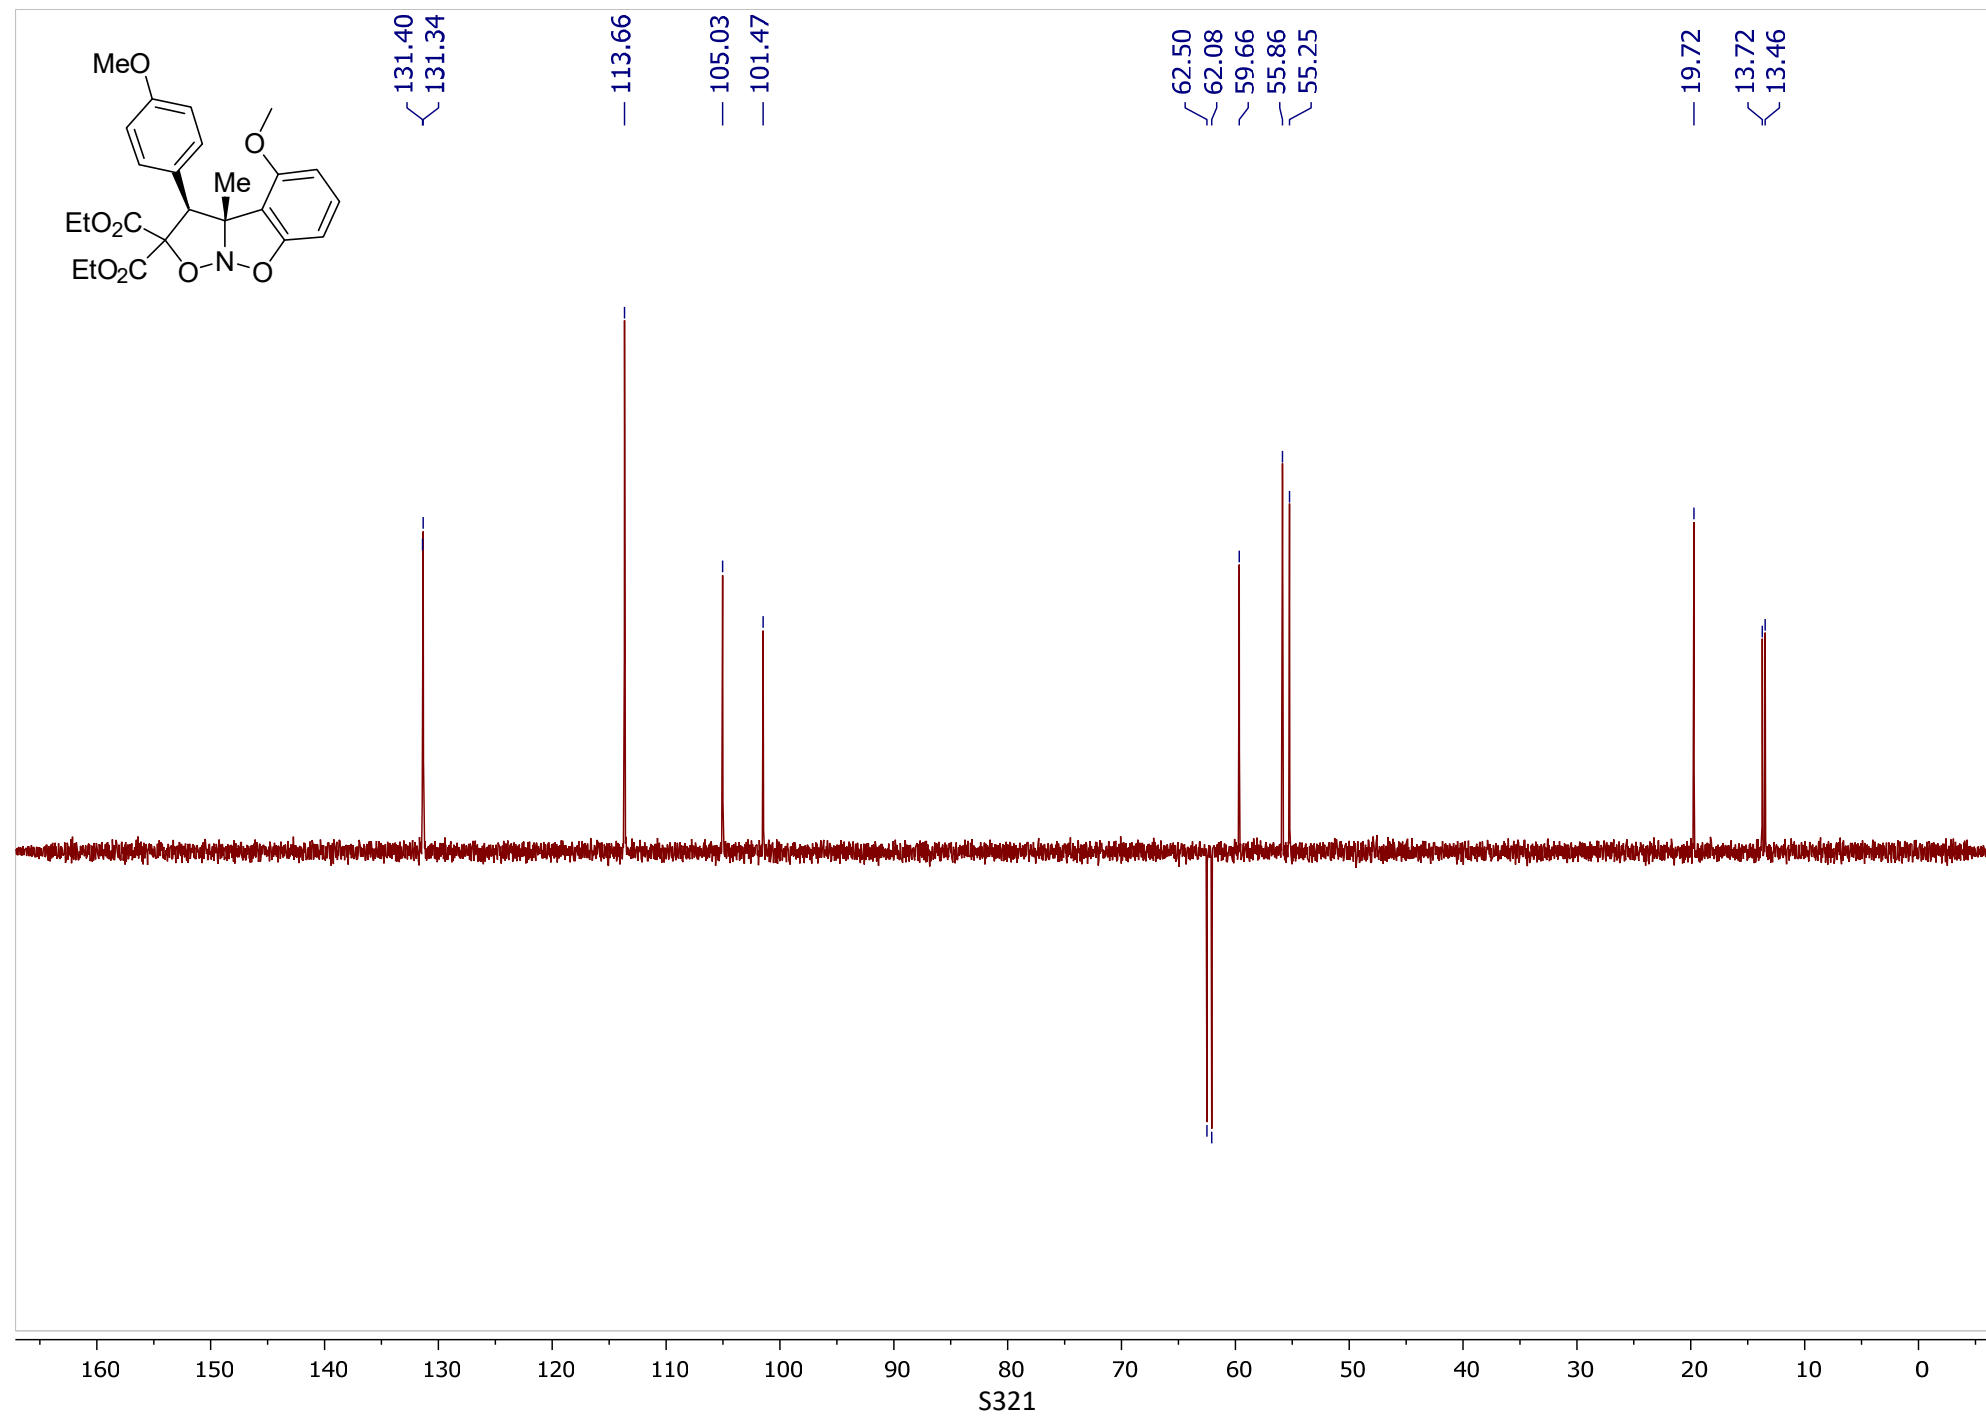

$^1\text{H}-^{13}\text{C}$  HSQC

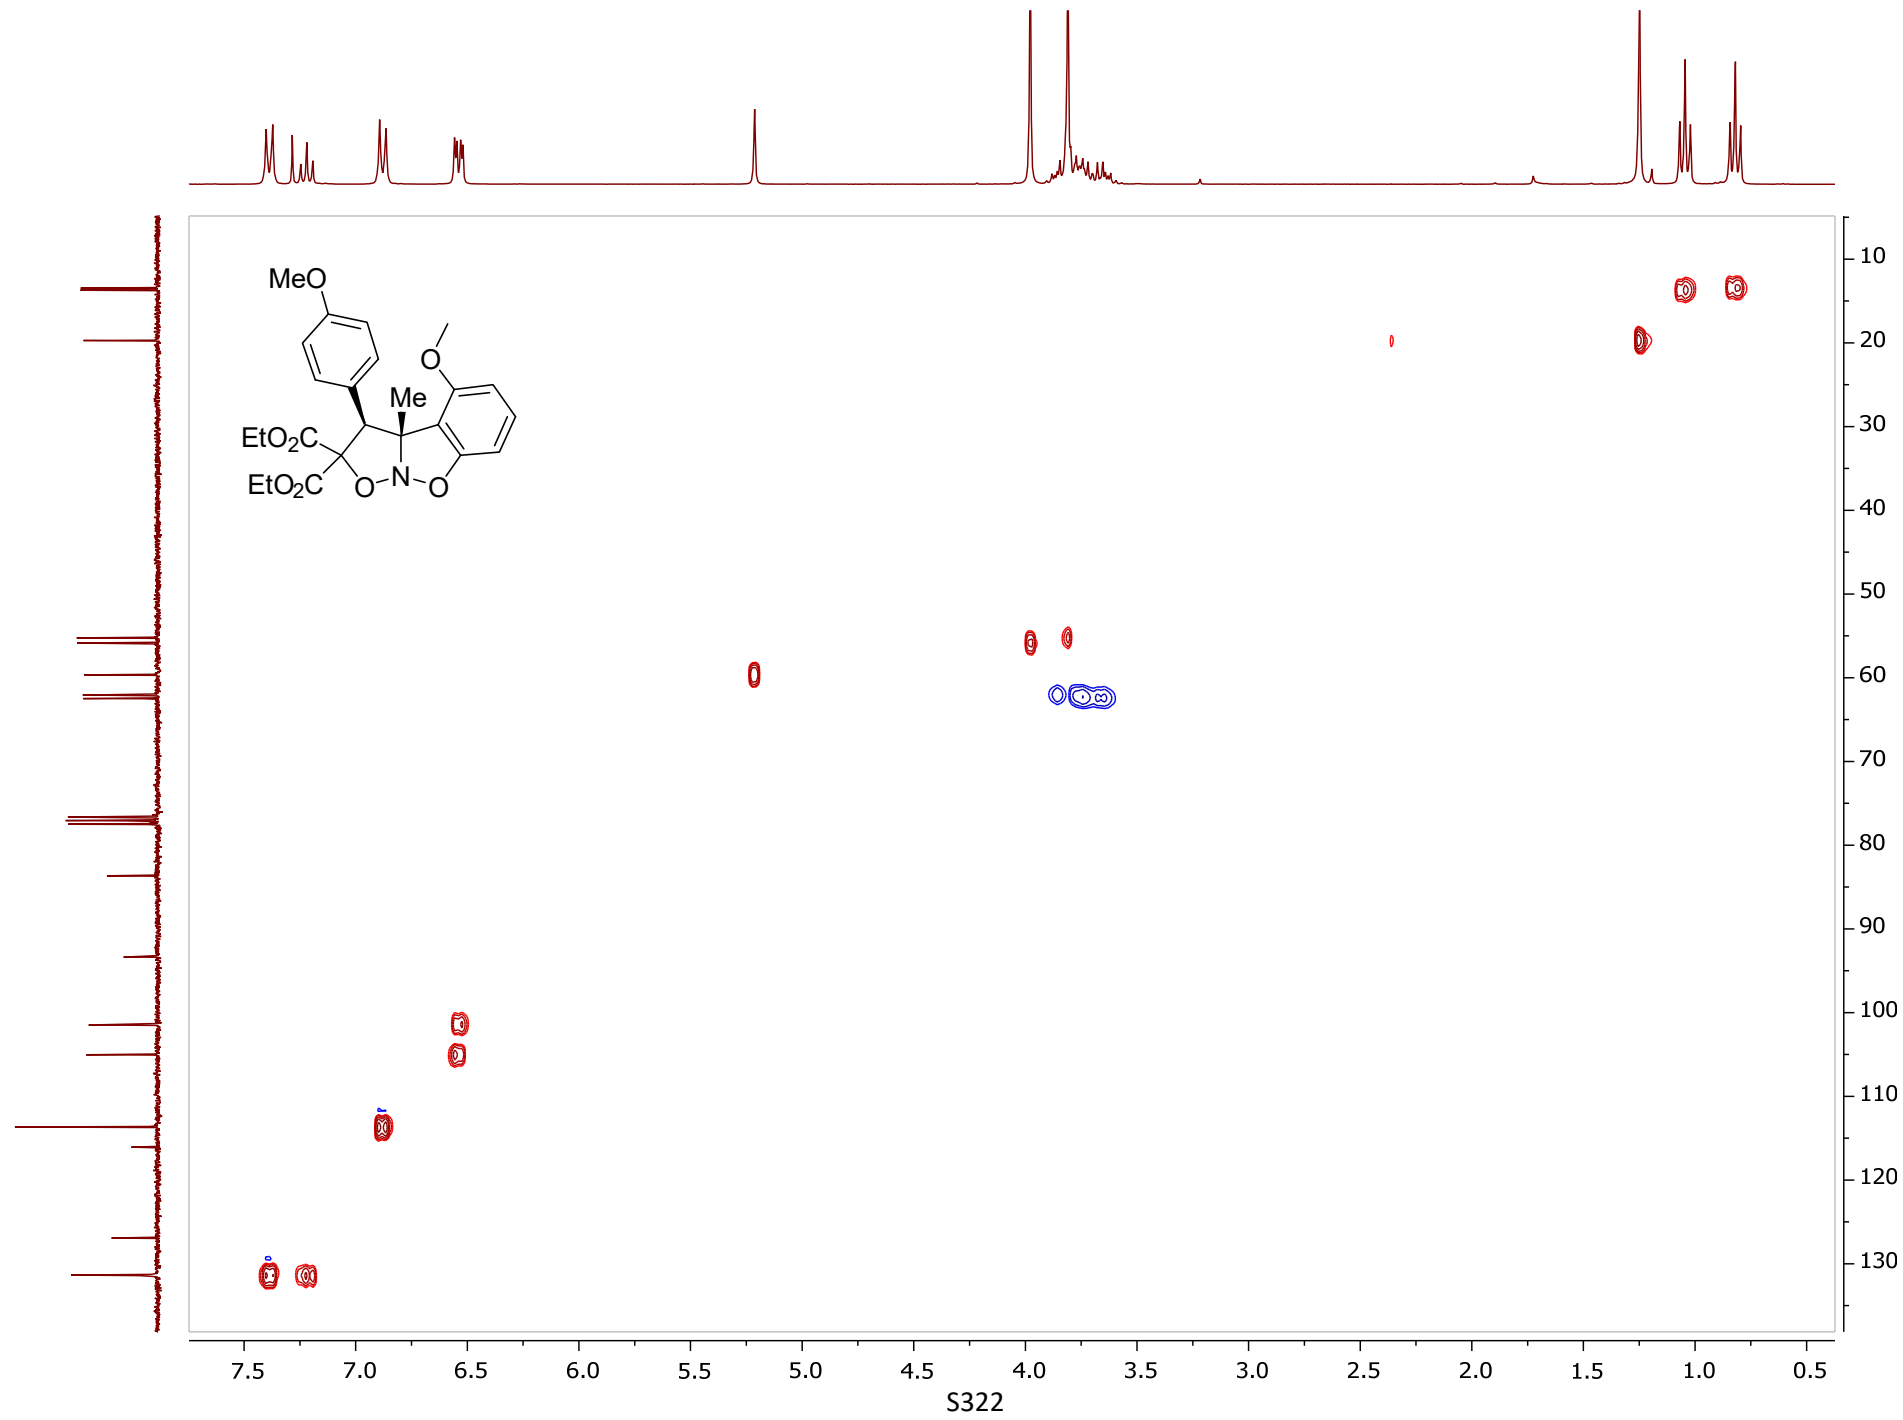

$^1\text{H}$ - $^{13}\text{C}$  HMBC

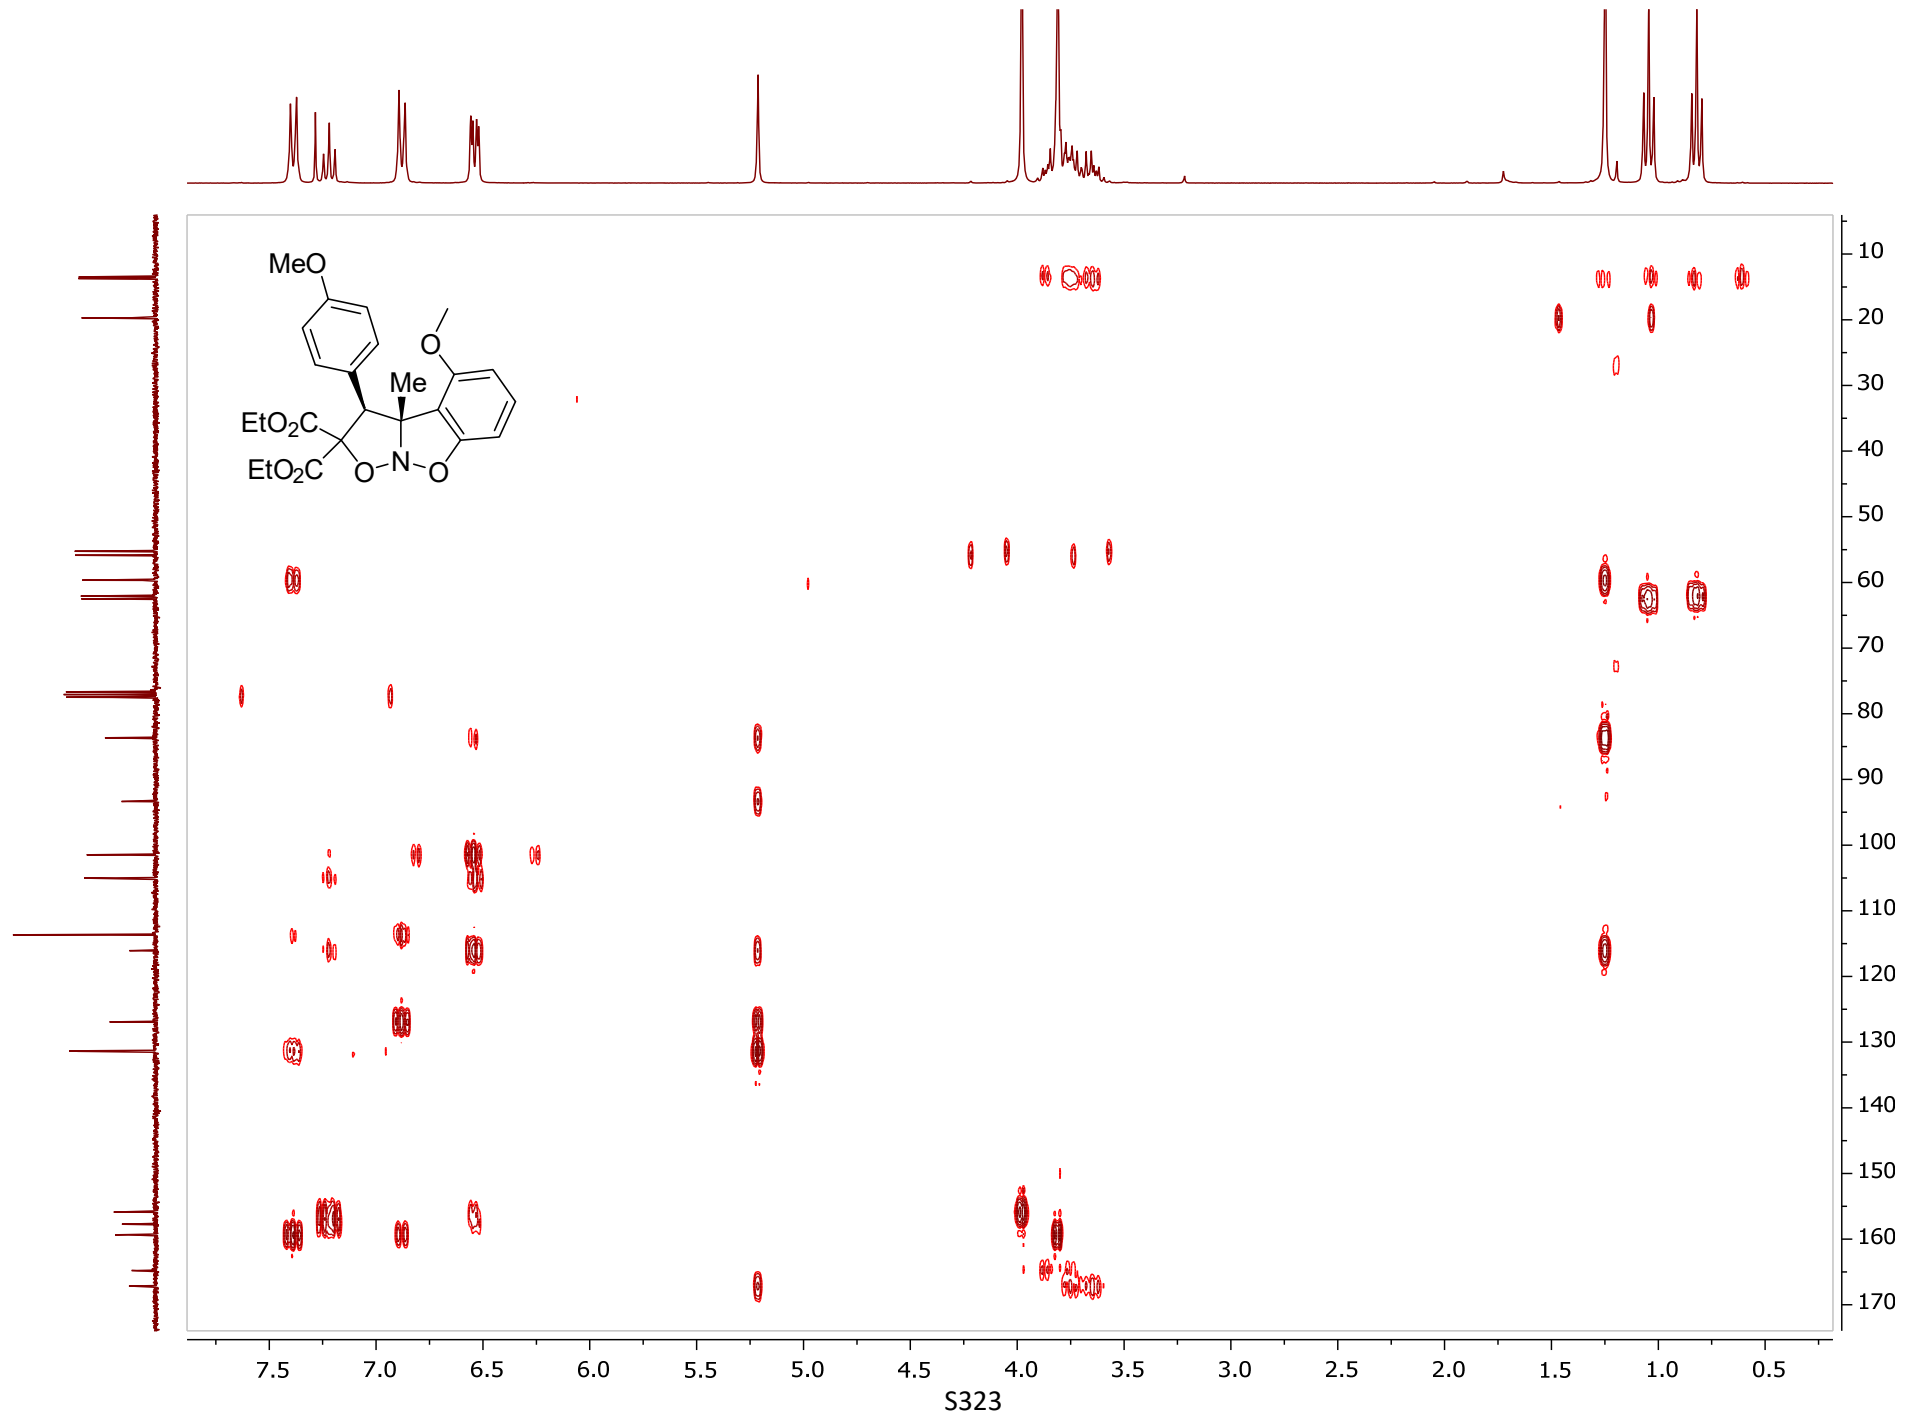

$^1\text{H}$ - $^1\text{H}$  NOESY

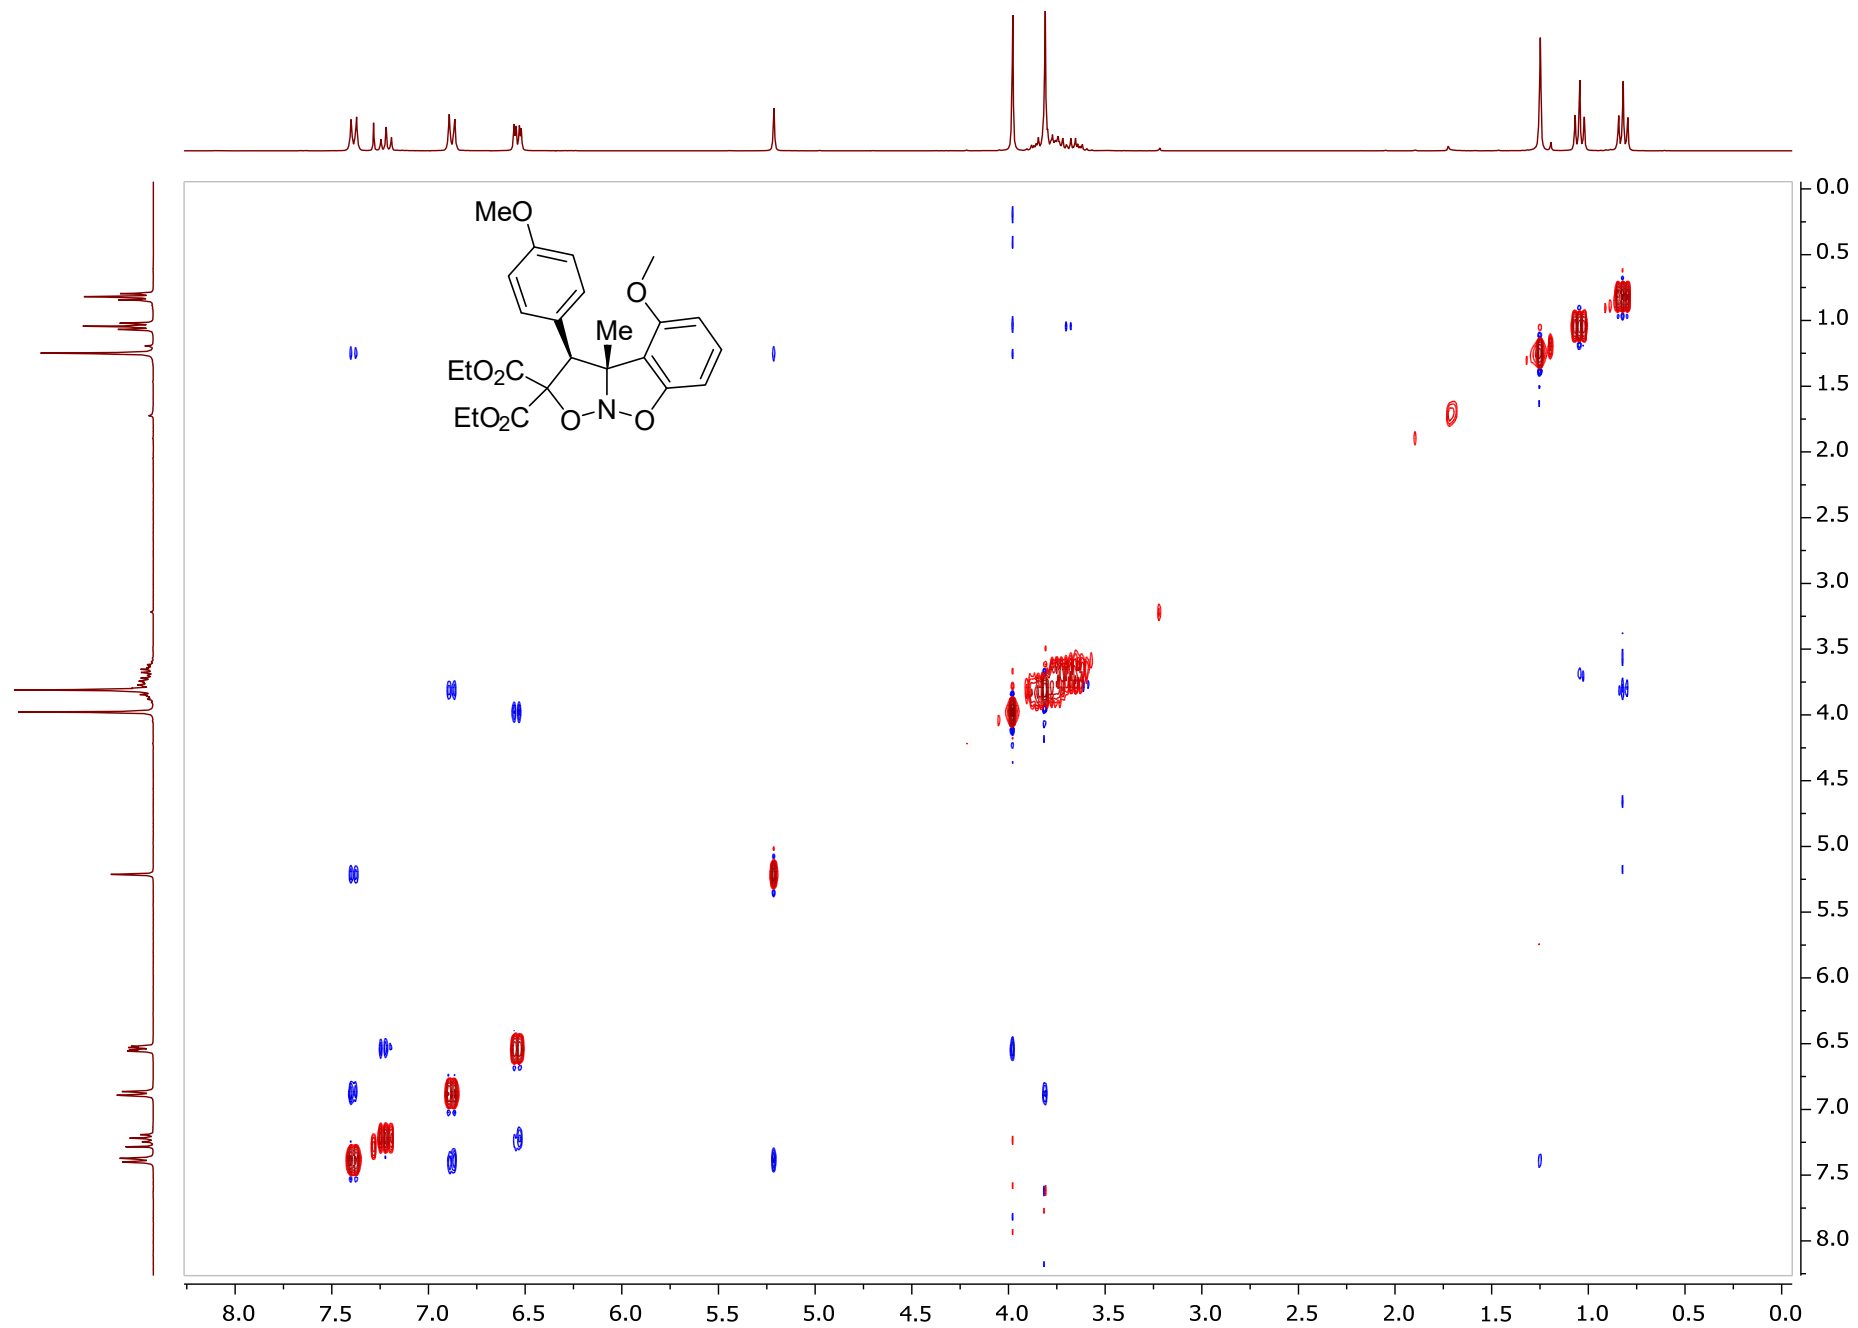

***tert*-Butyl ((2*S*\*,3*S*\*)-5-hydroxy-2-(2-hydroxyphenyl)-3-(4-methoxyphenyl)-5-methylhexan-2-yl)carbamate 7aa**

<sup>1</sup>H NMR (300 MHz, CDCl<sub>3</sub>)

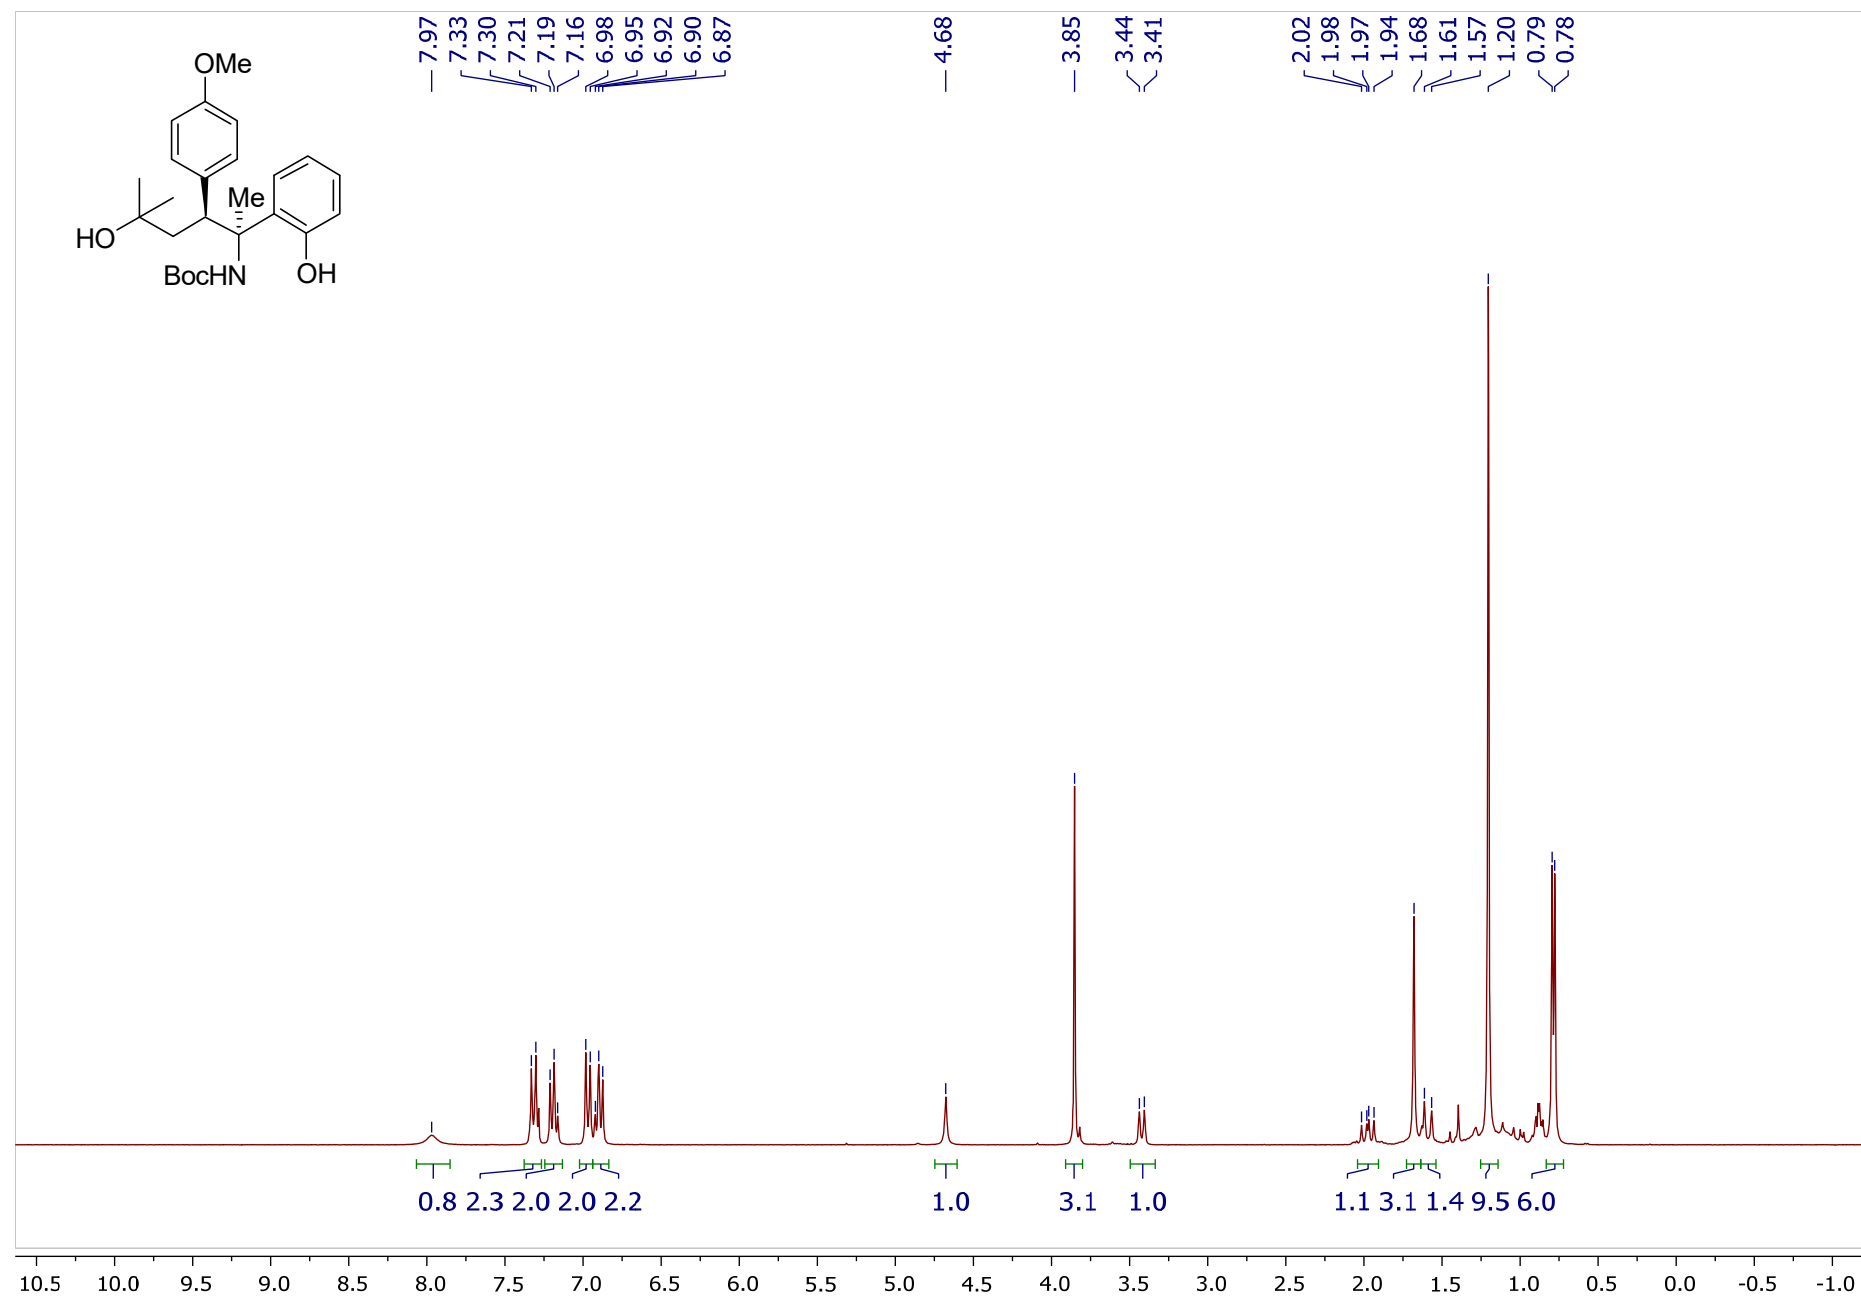

$^{13}\text{C}$  NMR (75 MHz,  $\text{CDCl}_3$ )

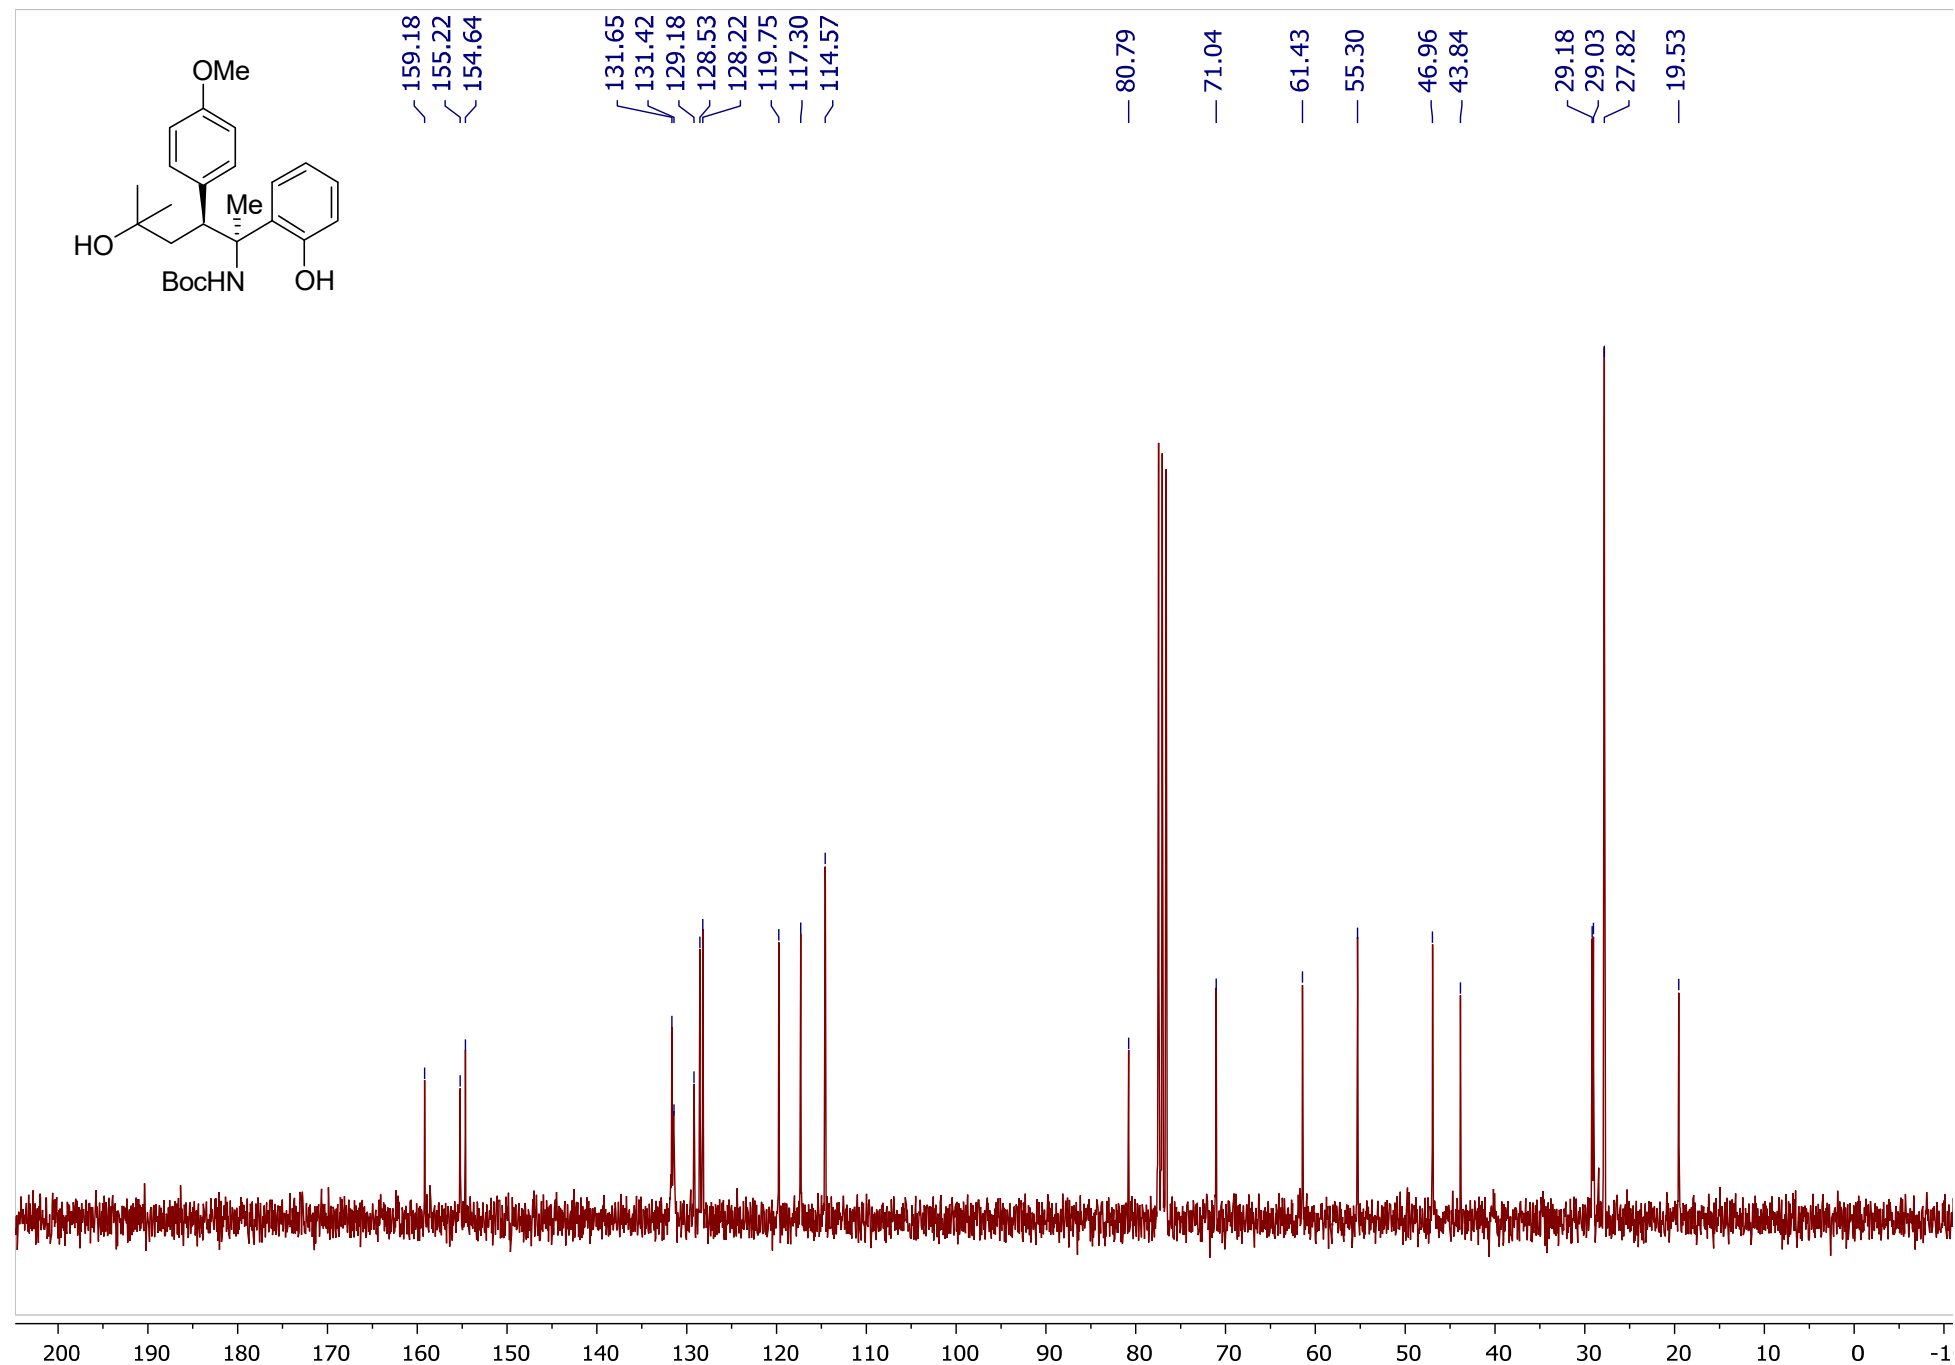

$^{13}\text{C}$  DEPT 135 (75 MHz,  $\text{CDCl}_3$ )

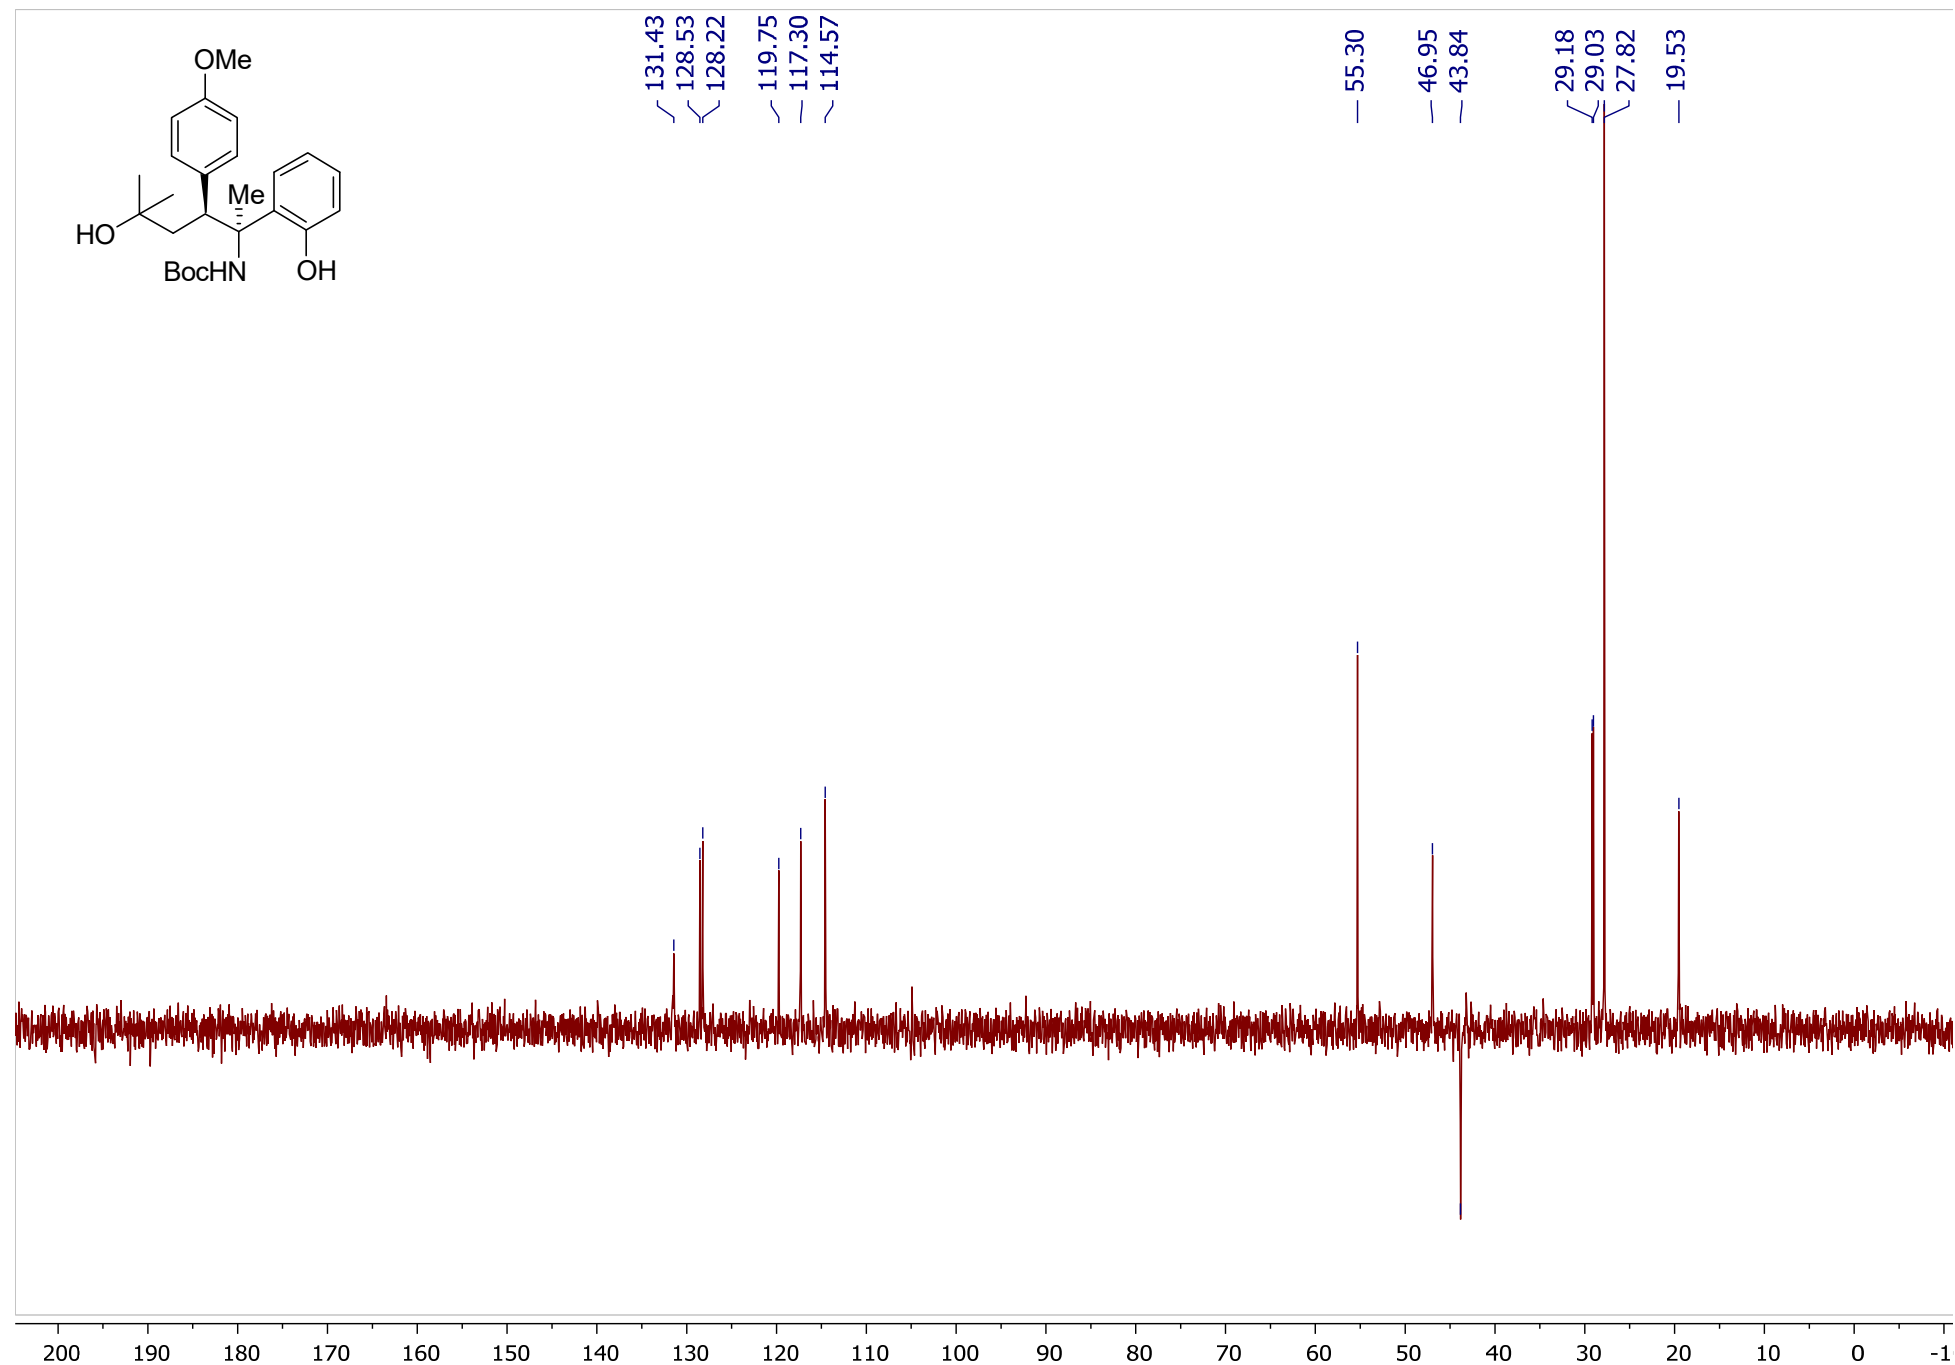

***tert*-Butyl ((2*S*\*,3*S*\*)-5-hydroxy-2-(2-hydroxy-6-methoxyphenyl)-3-(4-methoxyphenyl)-5-methylhexan-2-yl)carbamate 7ab**

<sup>1</sup>H NMR (300 MHz, CDCl<sub>3</sub>)

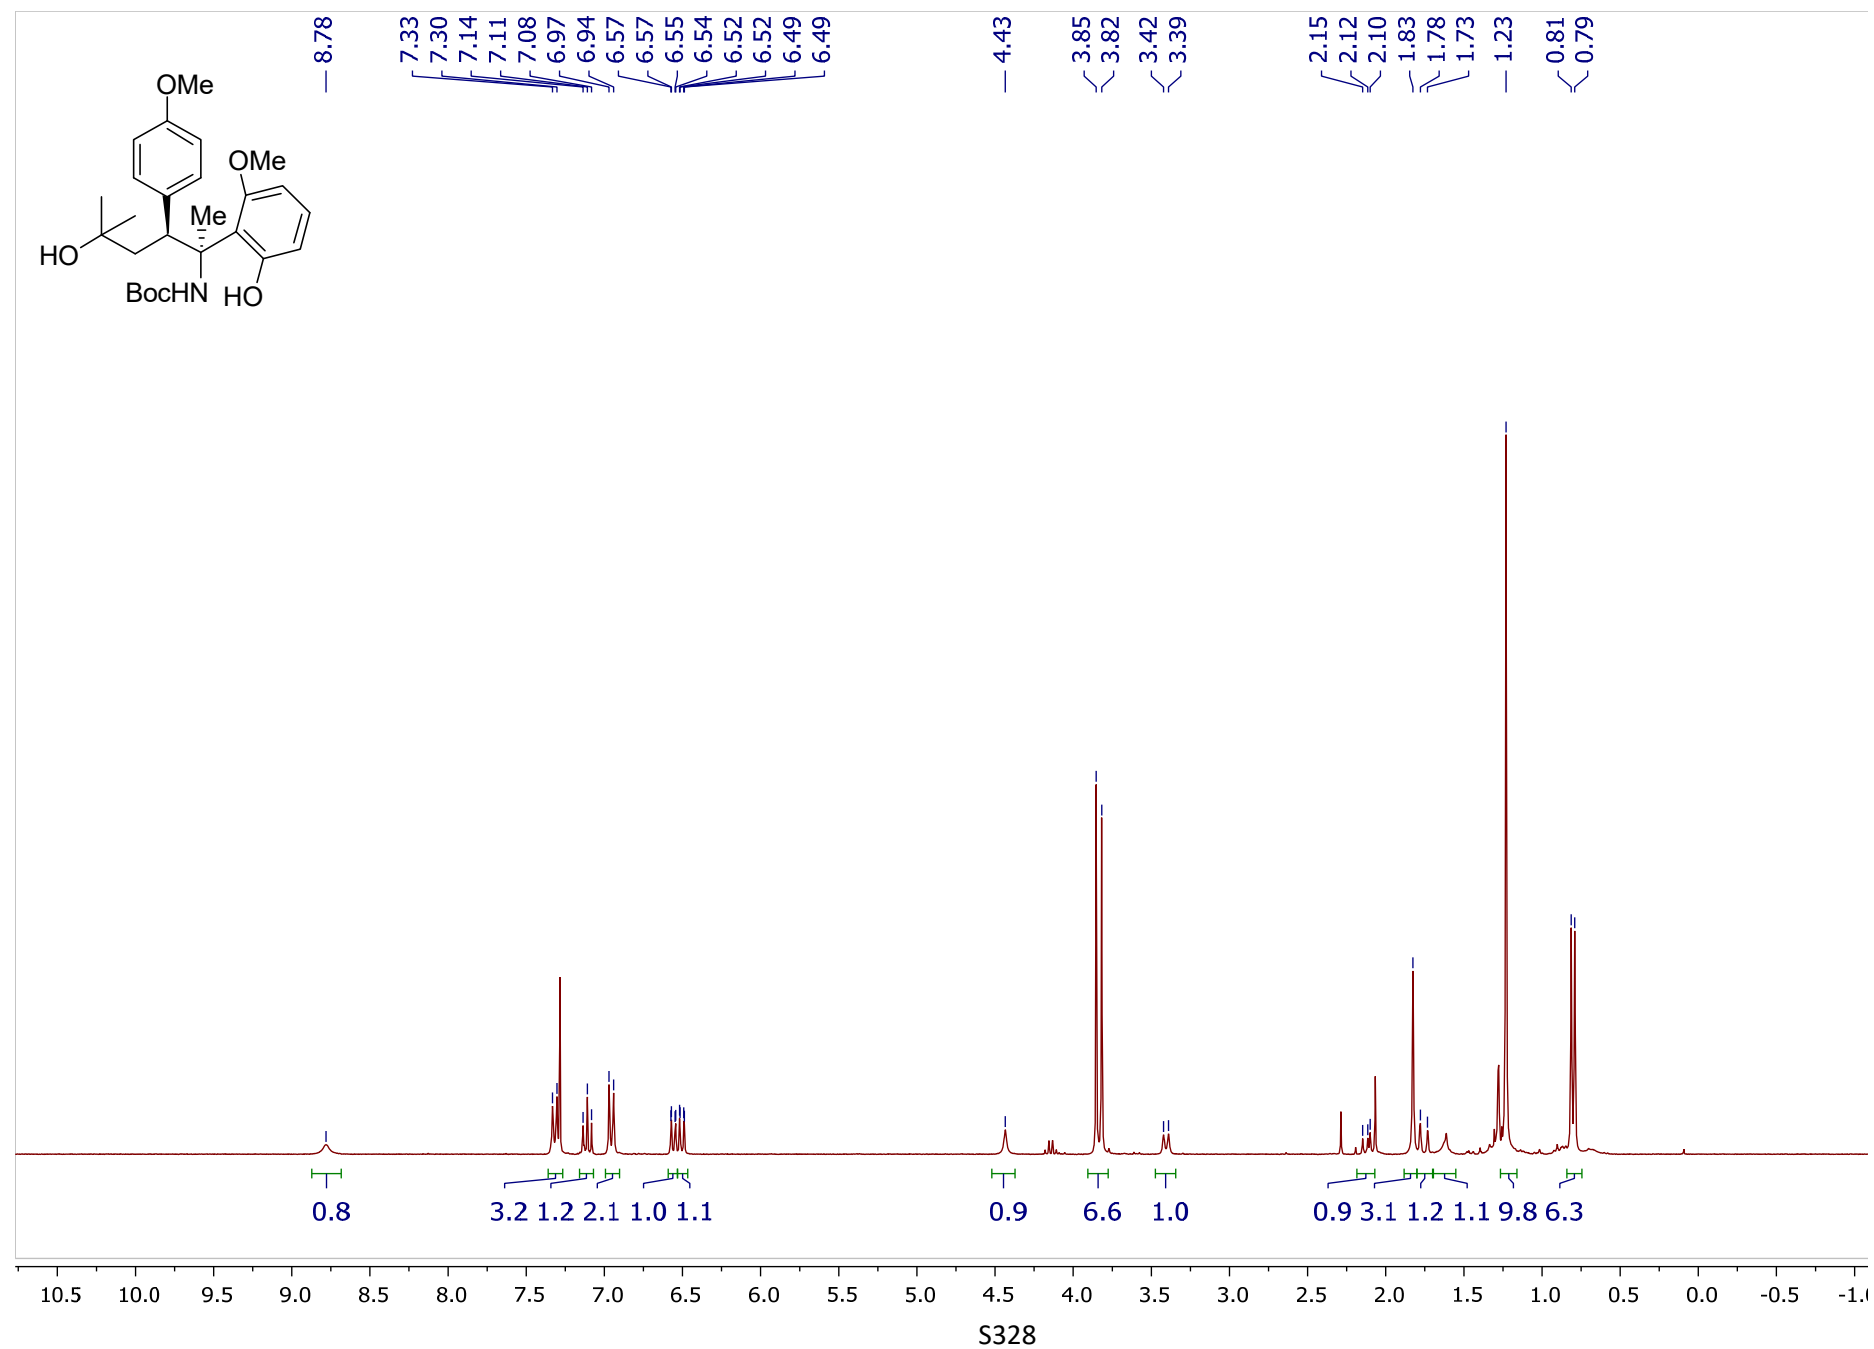



$^{13}\text{C}$  NMR (75 MHz,  $\text{CDCl}_3$ )

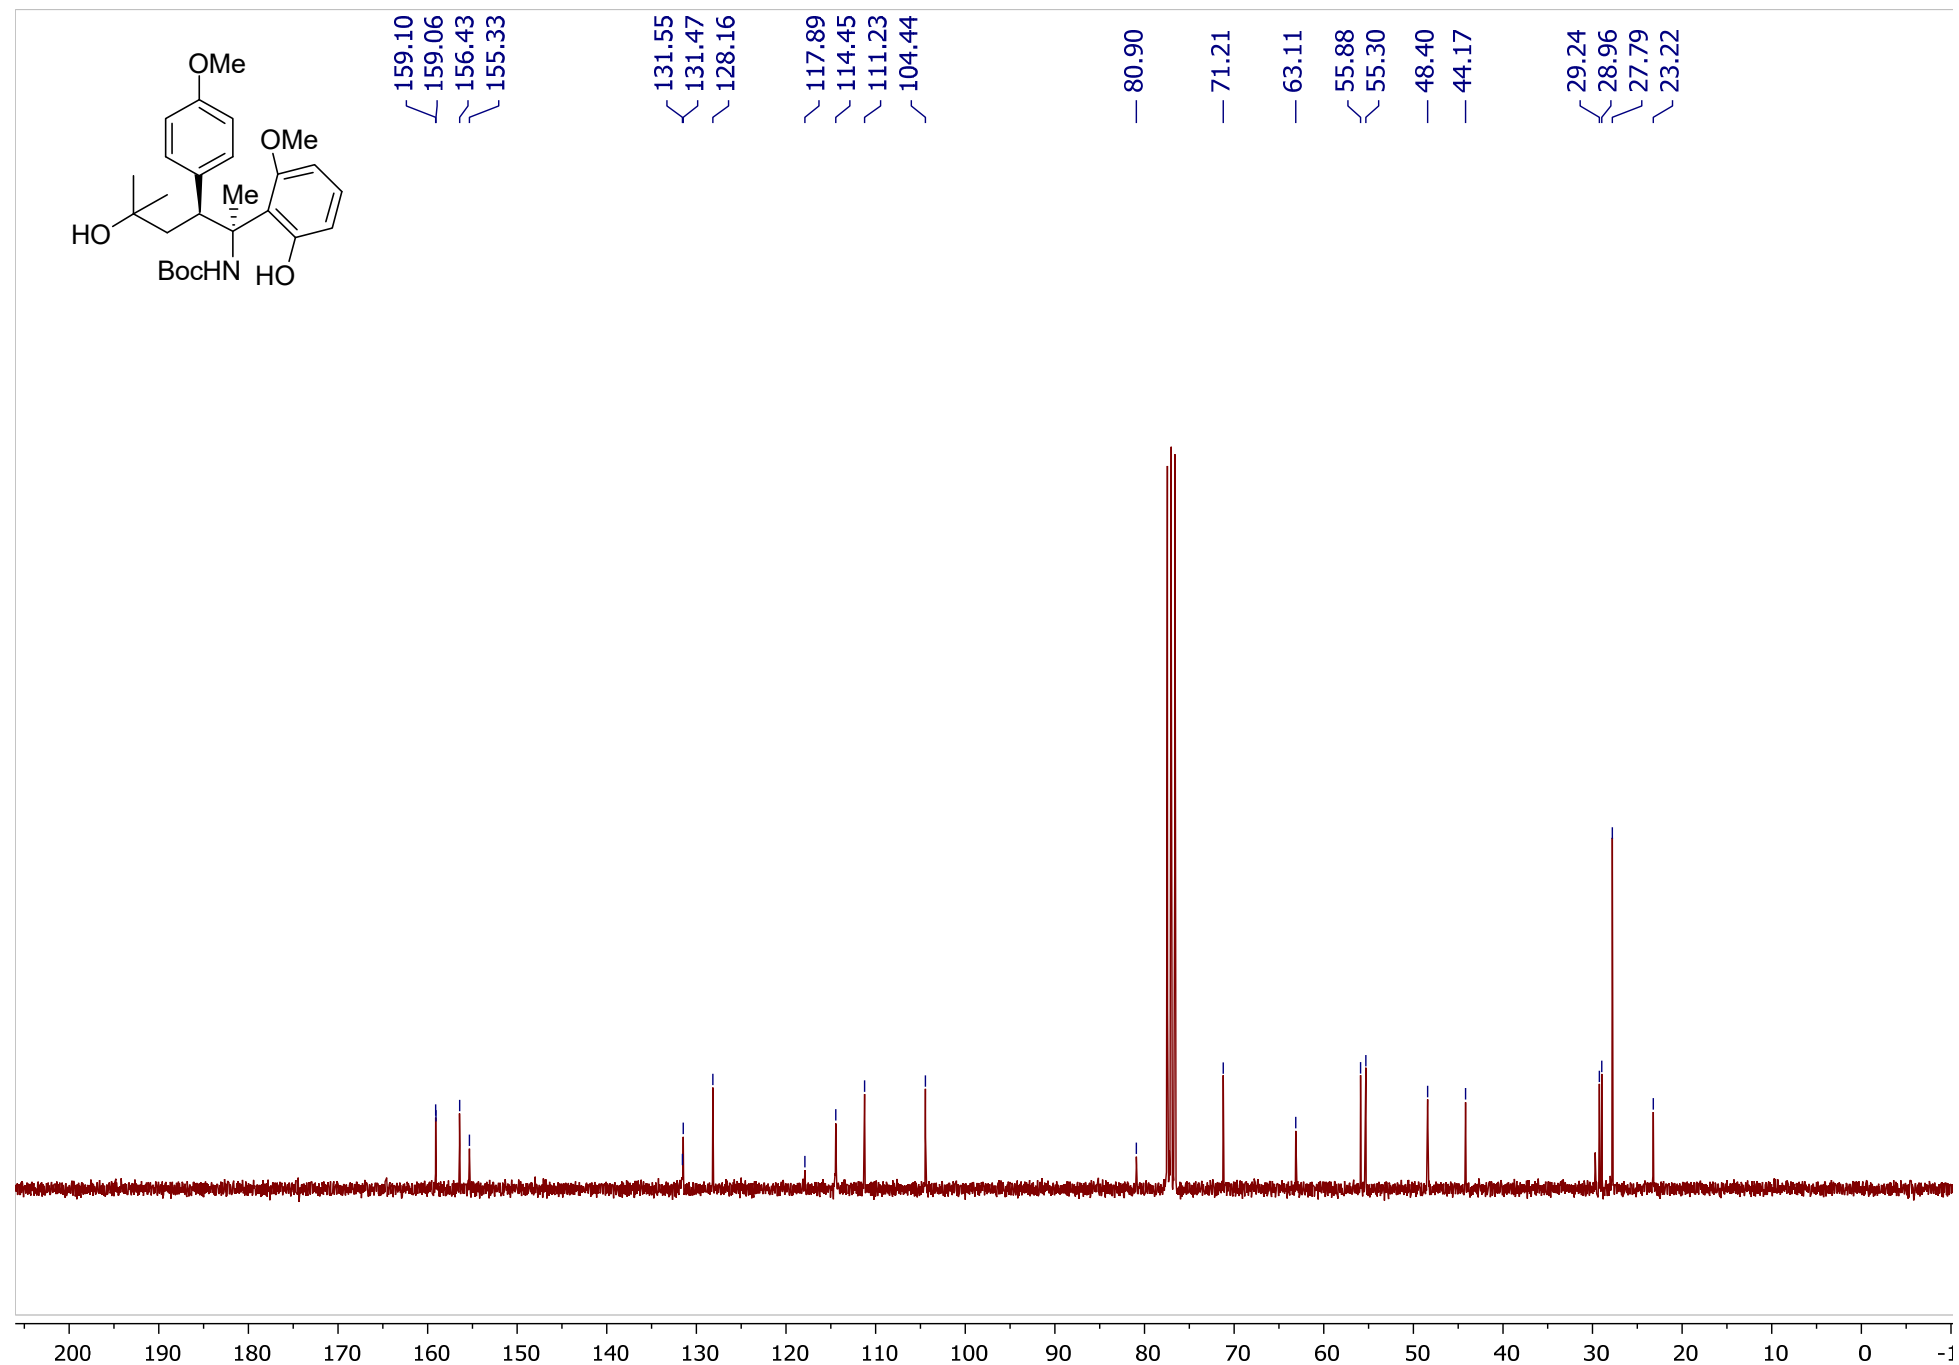



$^1\text{H}-^{13}\text{C}$  HSQC

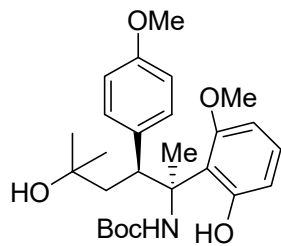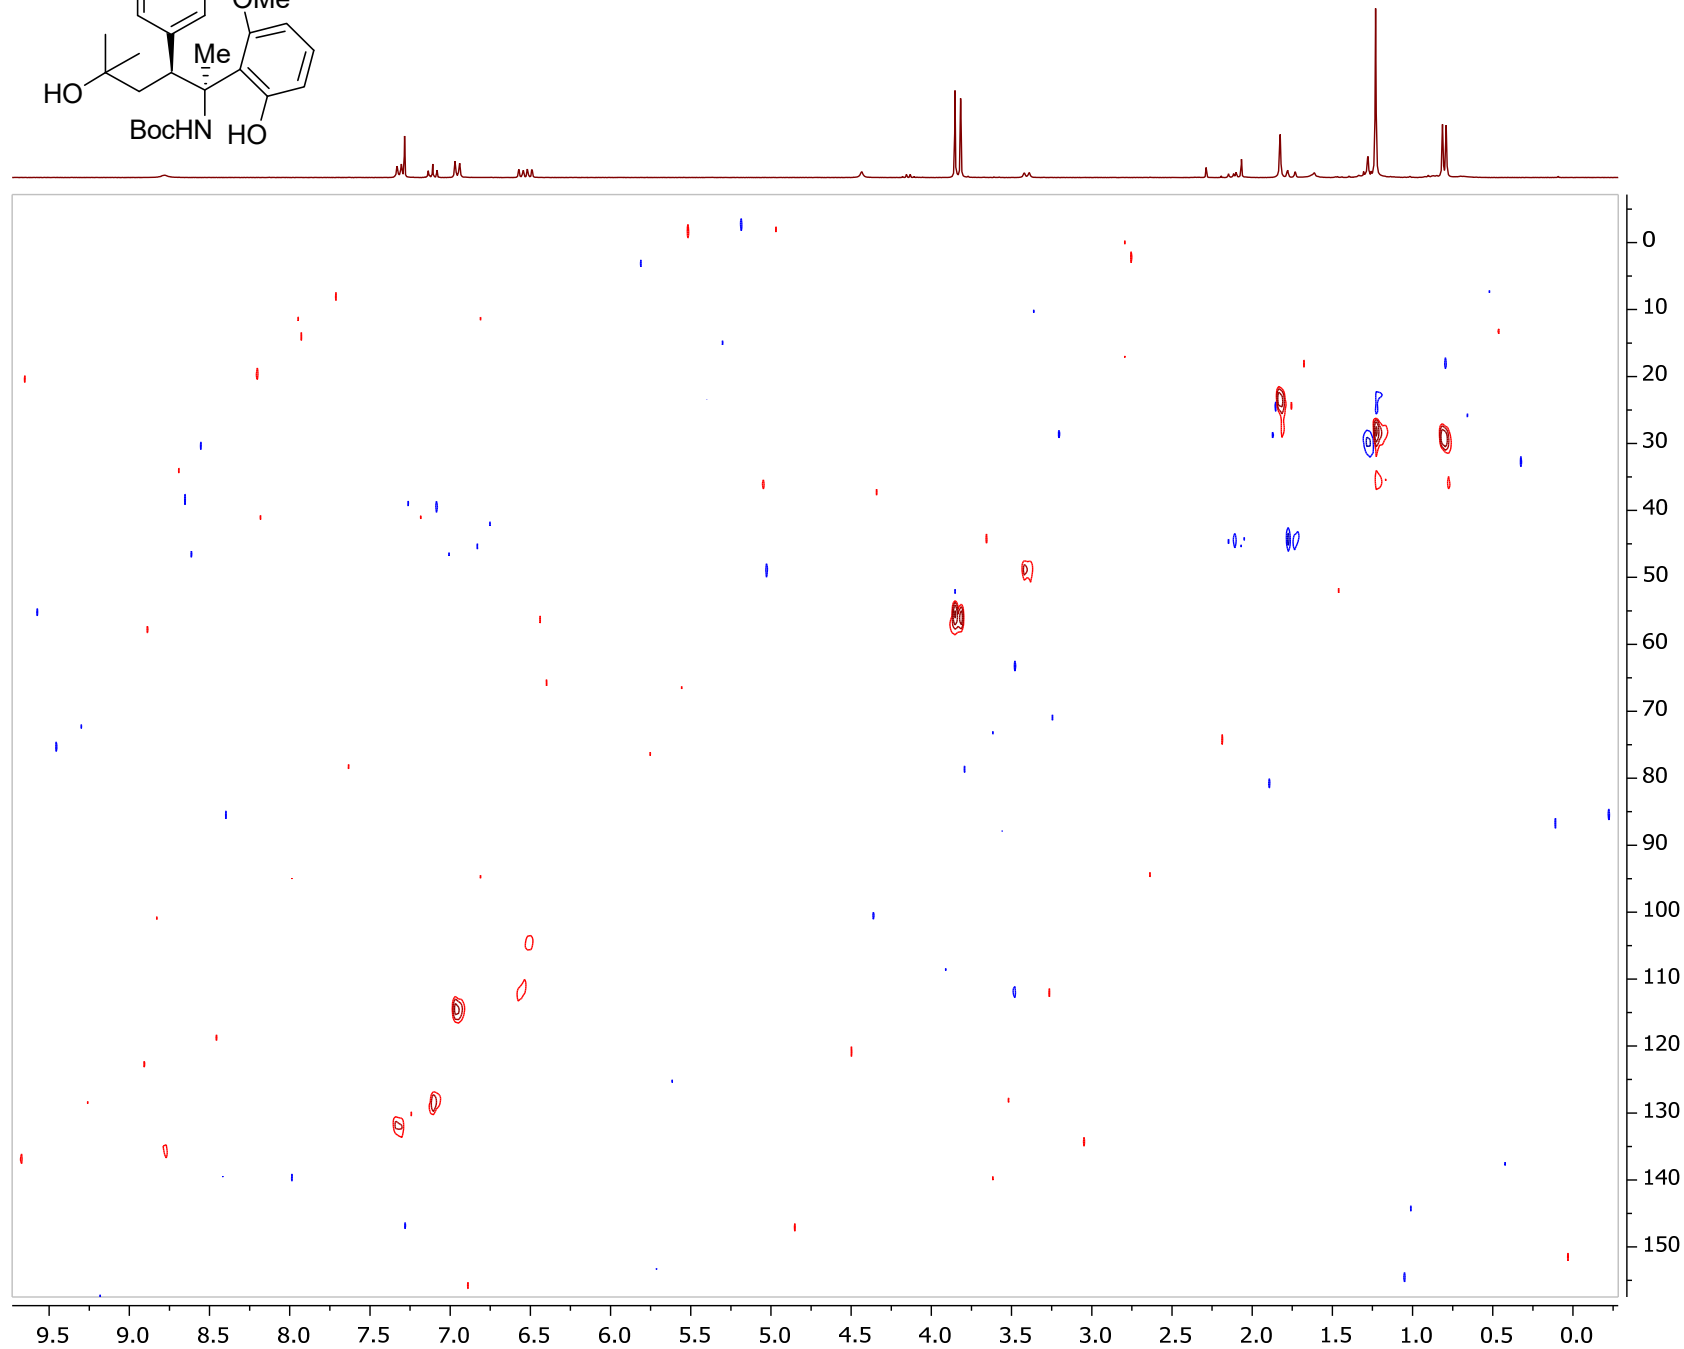

S331

$^1\text{H}$ - $^{13}\text{C}$  HMBC

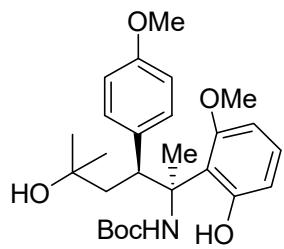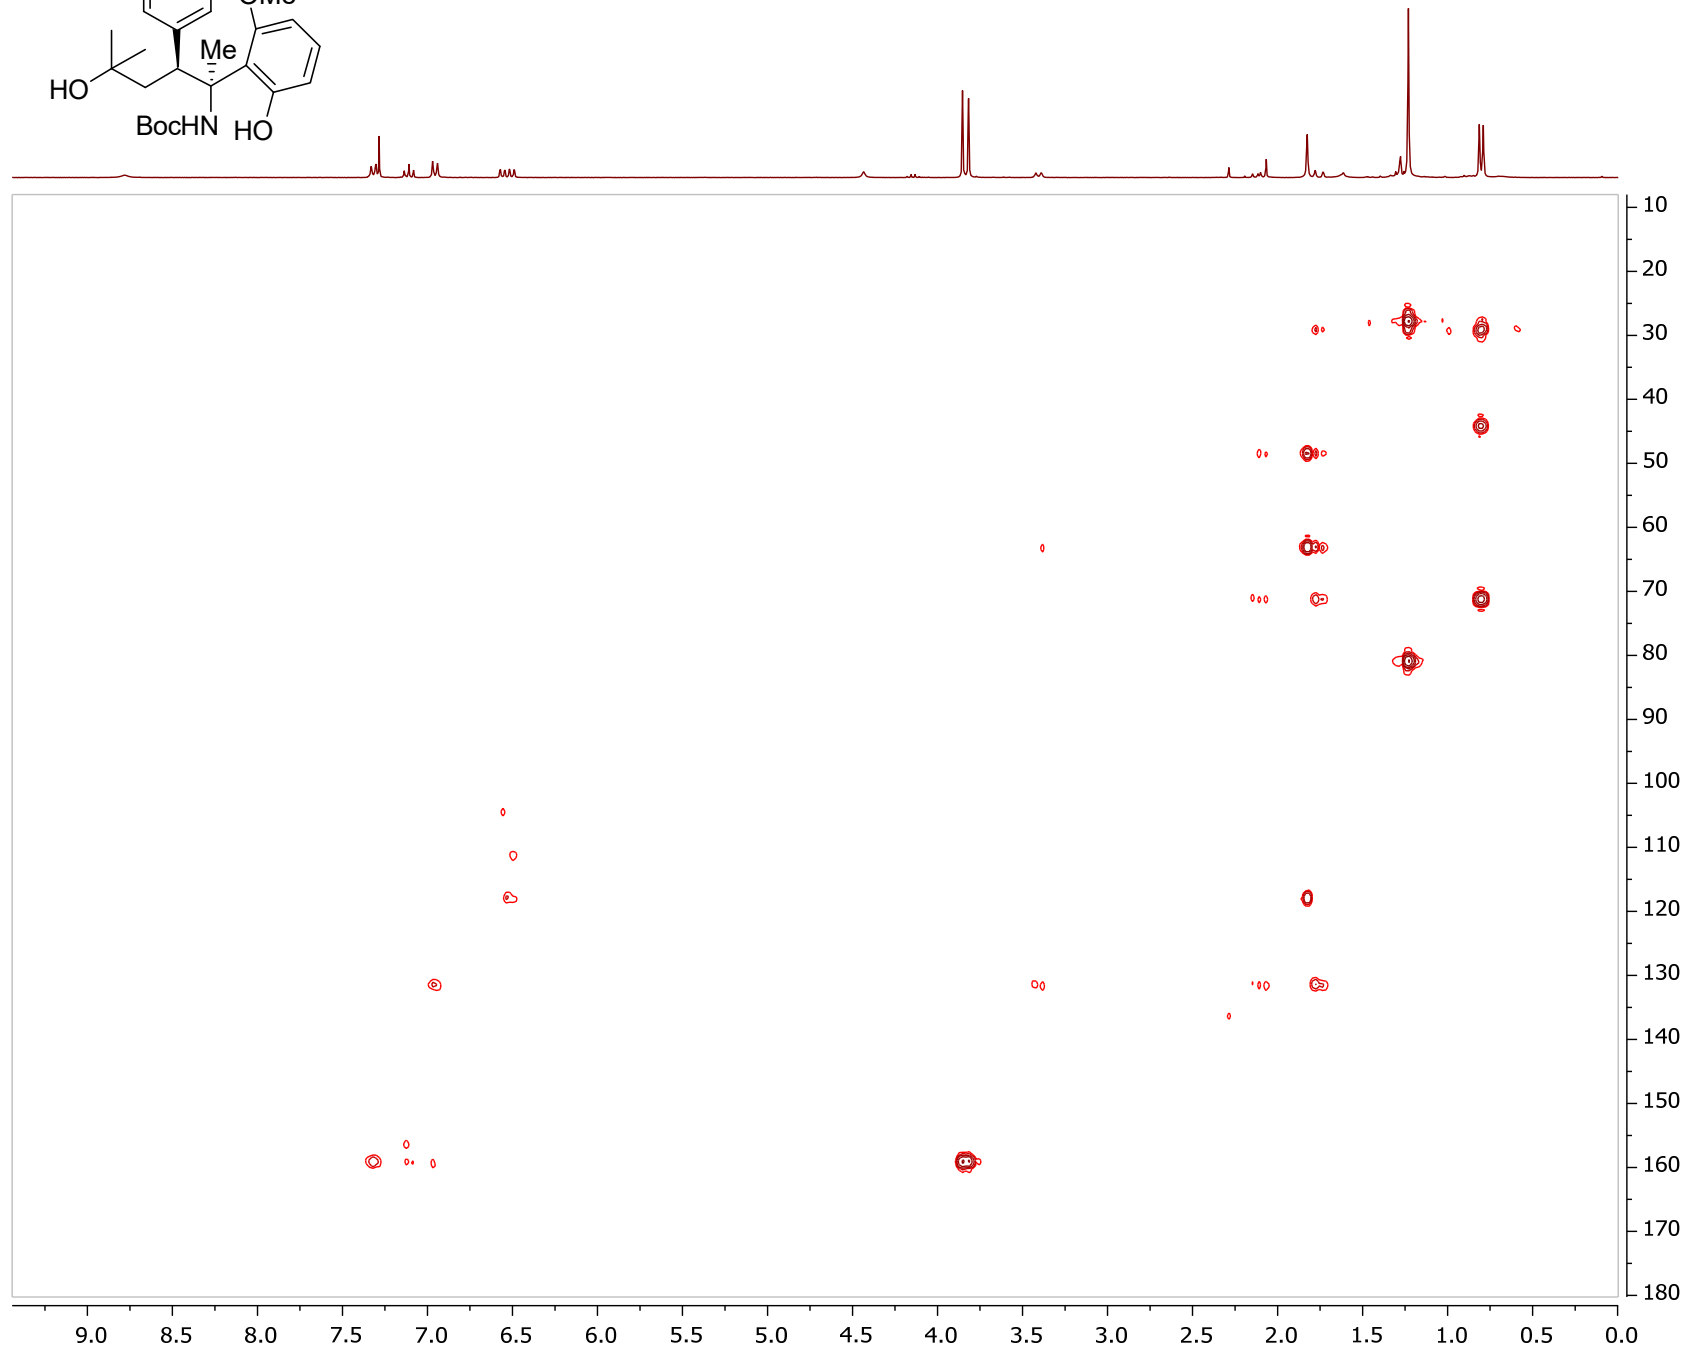

***tert*-Butyl ((2*S*\*,3*R*\*)-5-hydroxy-2-(2-hydroxyphenyl)-3,5-dimethylhexan-2-yl)carbamate 7da**

<sup>1</sup>H NMR (300 MHz, CDCl<sub>3</sub>)

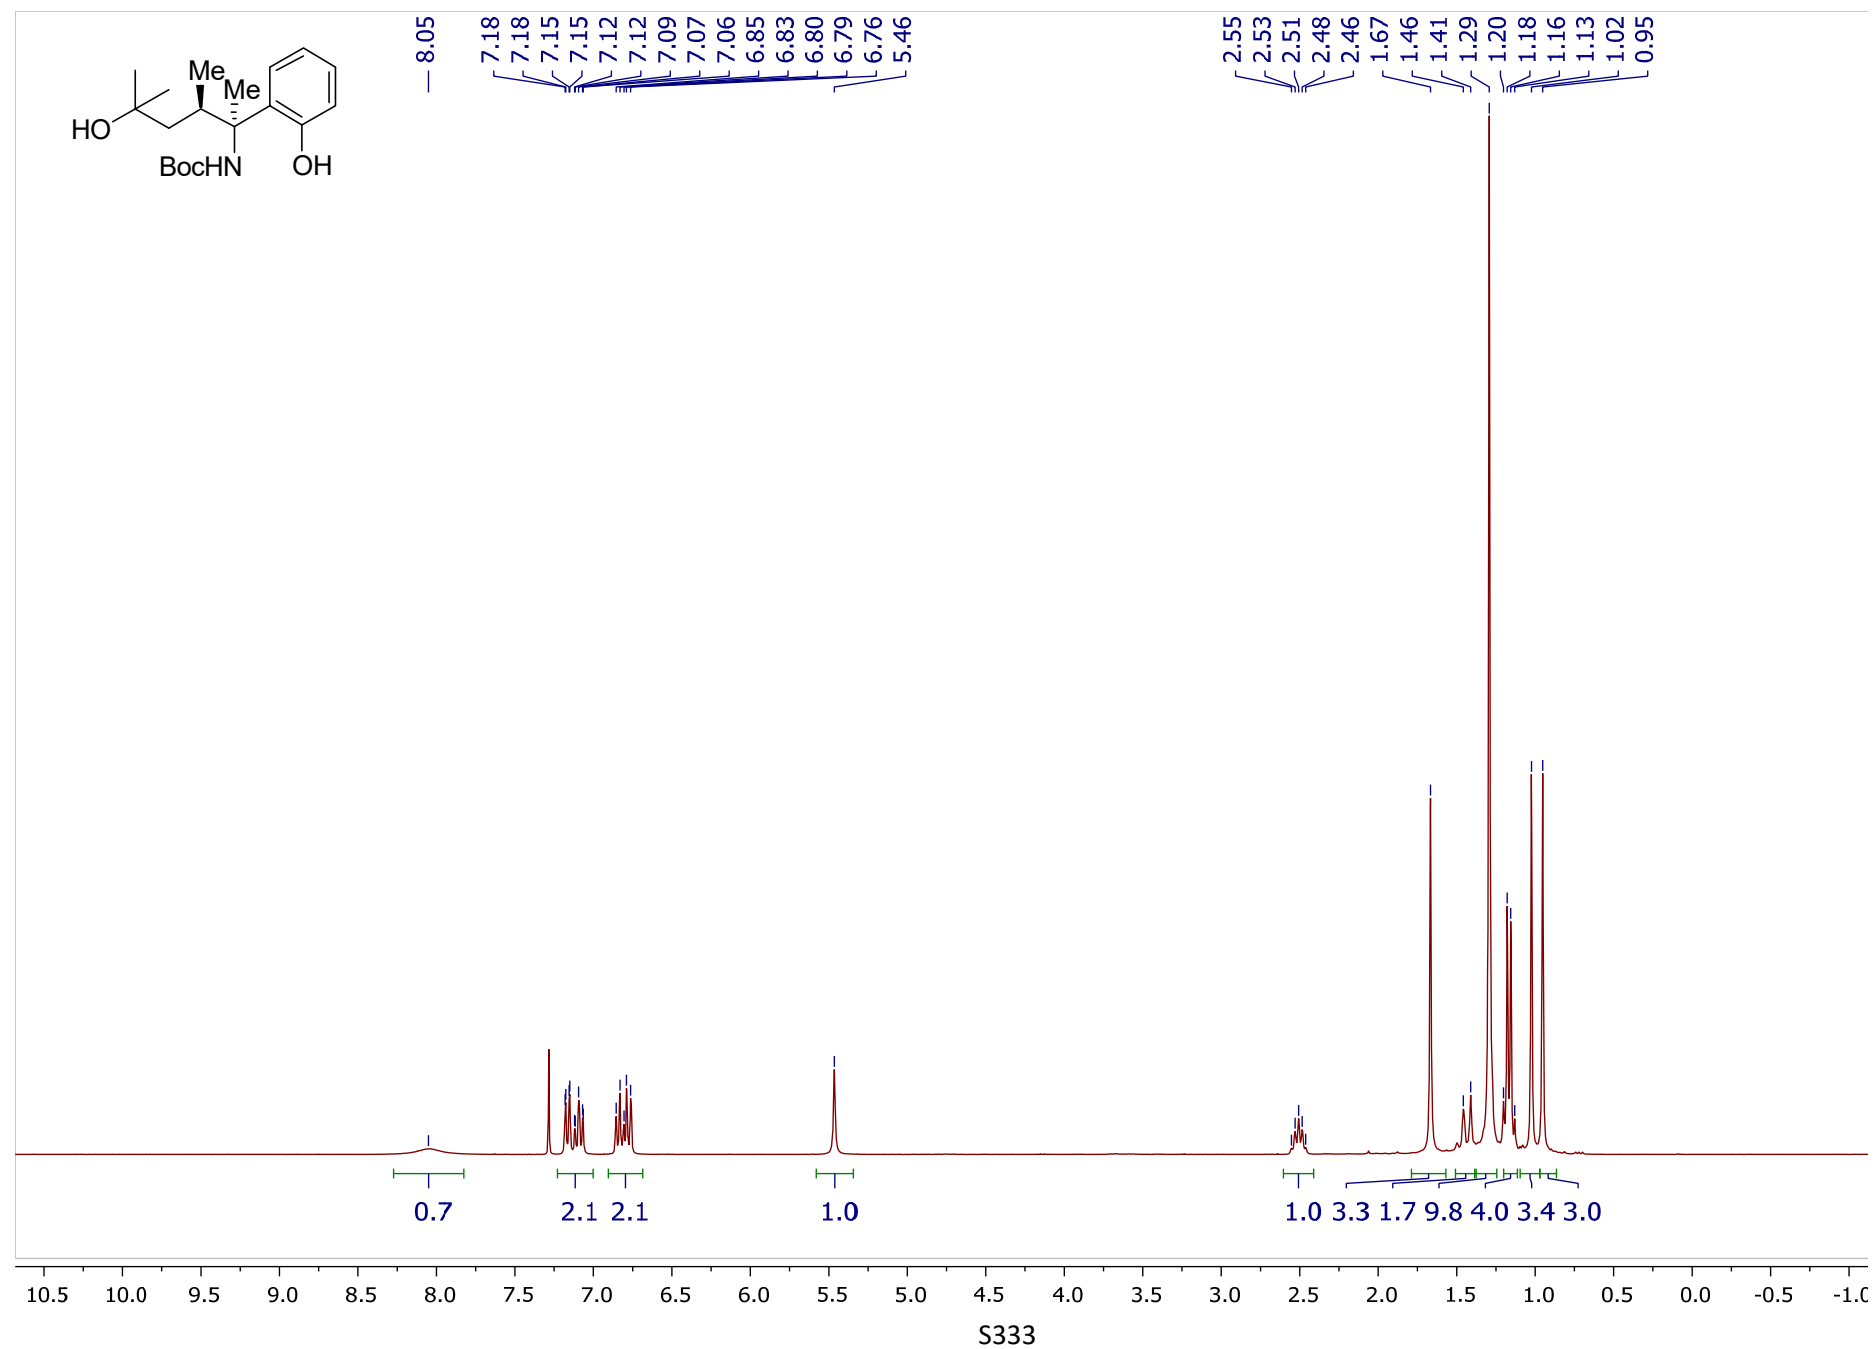

$^{13}\text{C}$  NMR (75 MHz,  $\text{CDCl}_3$ )

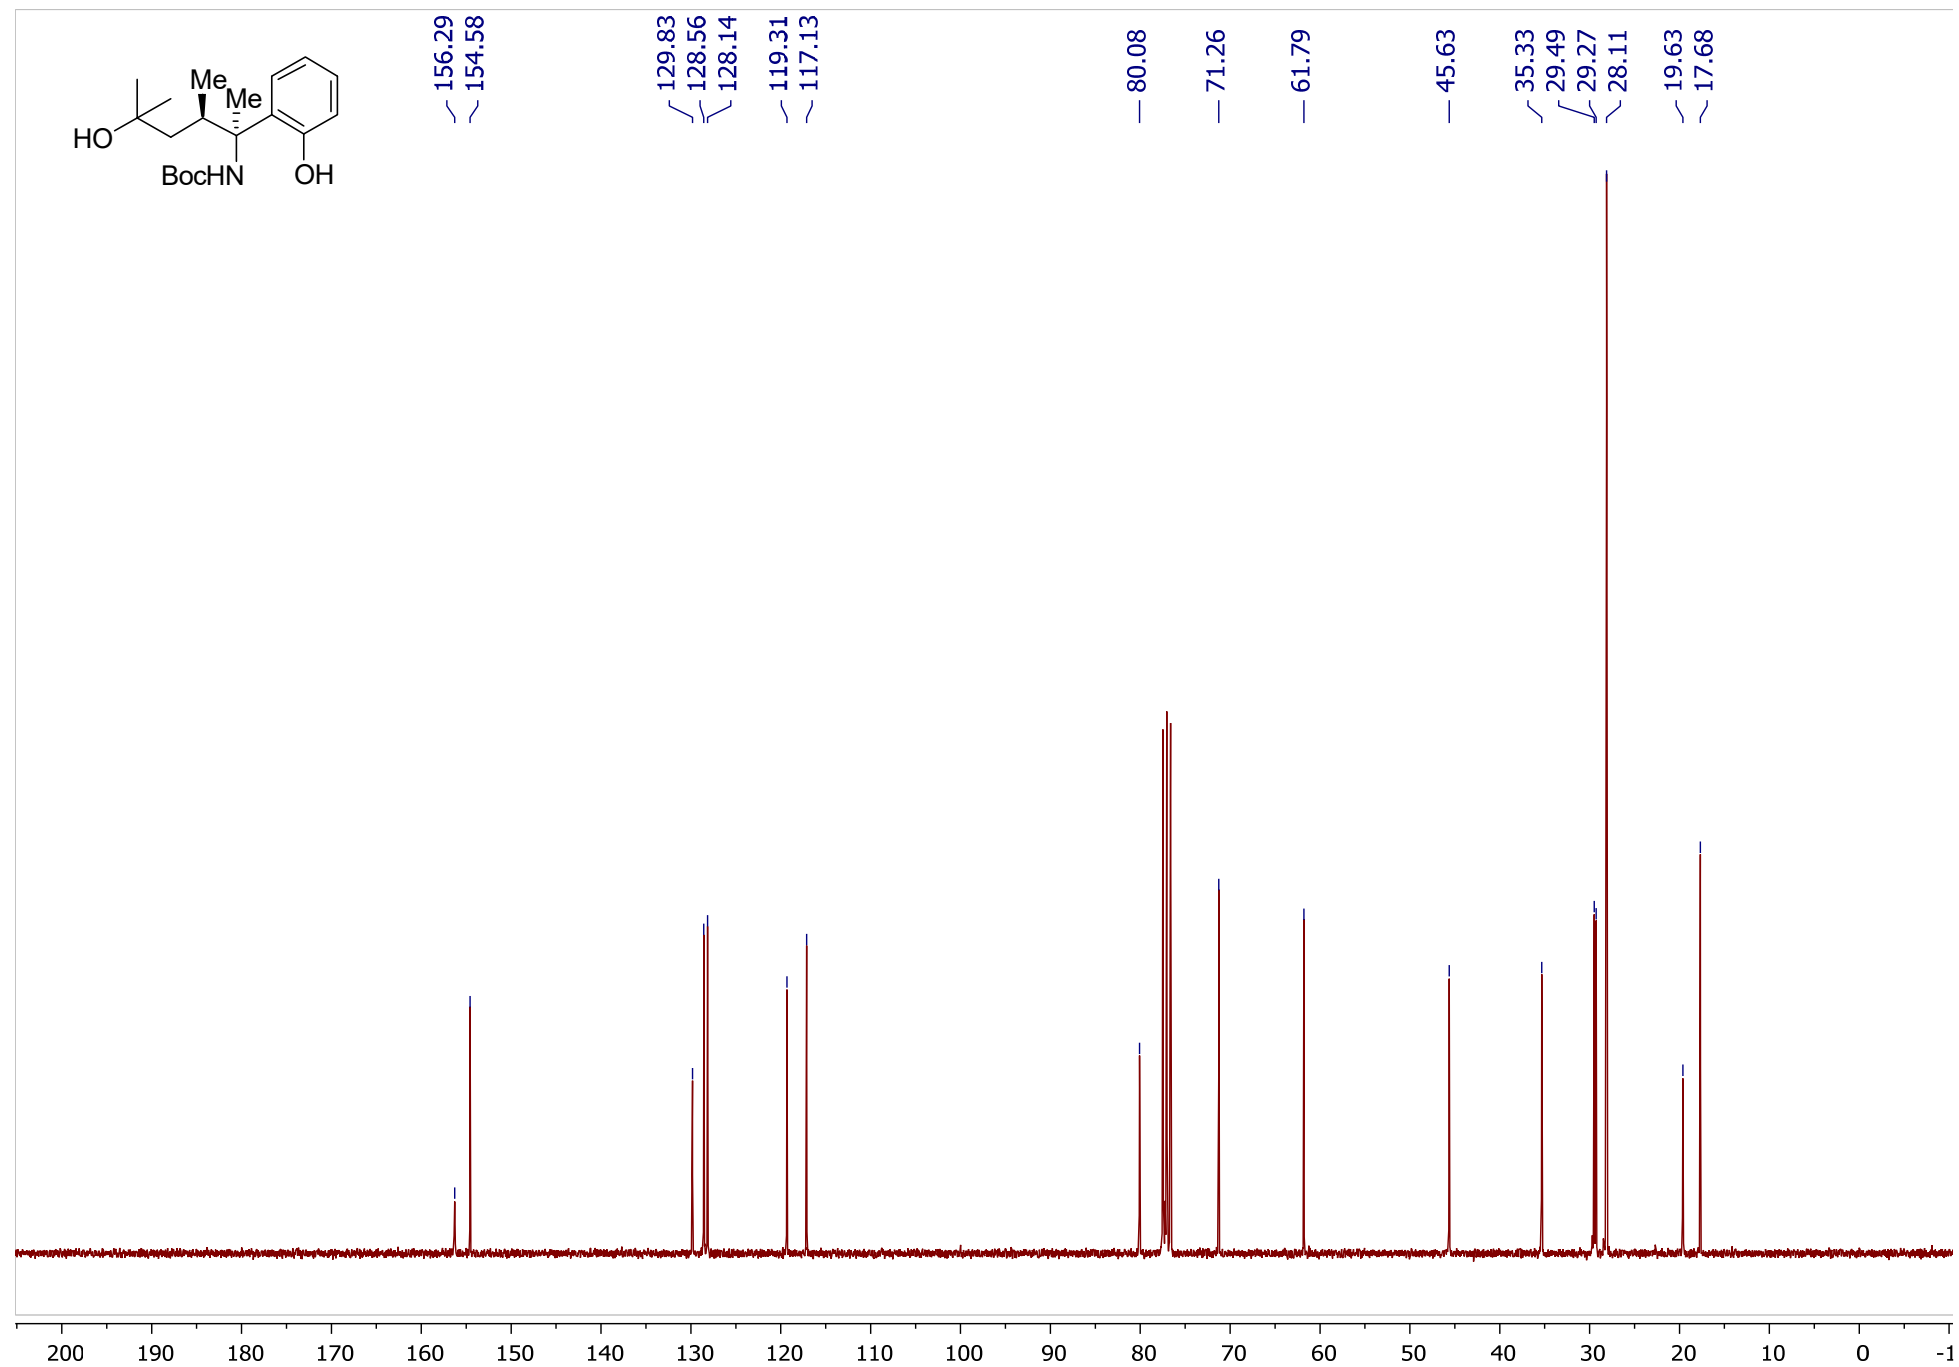

$^{13}\text{C}$  DEPT 135 (75 MHz,  $\text{CDCl}_3$ )

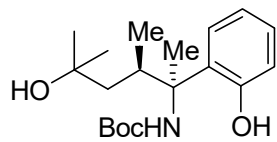

128.56  
128.14  
119.31  
117.13

45.63  
35.32  
29.49  
29.27  
28.12  
19.62  
17.68

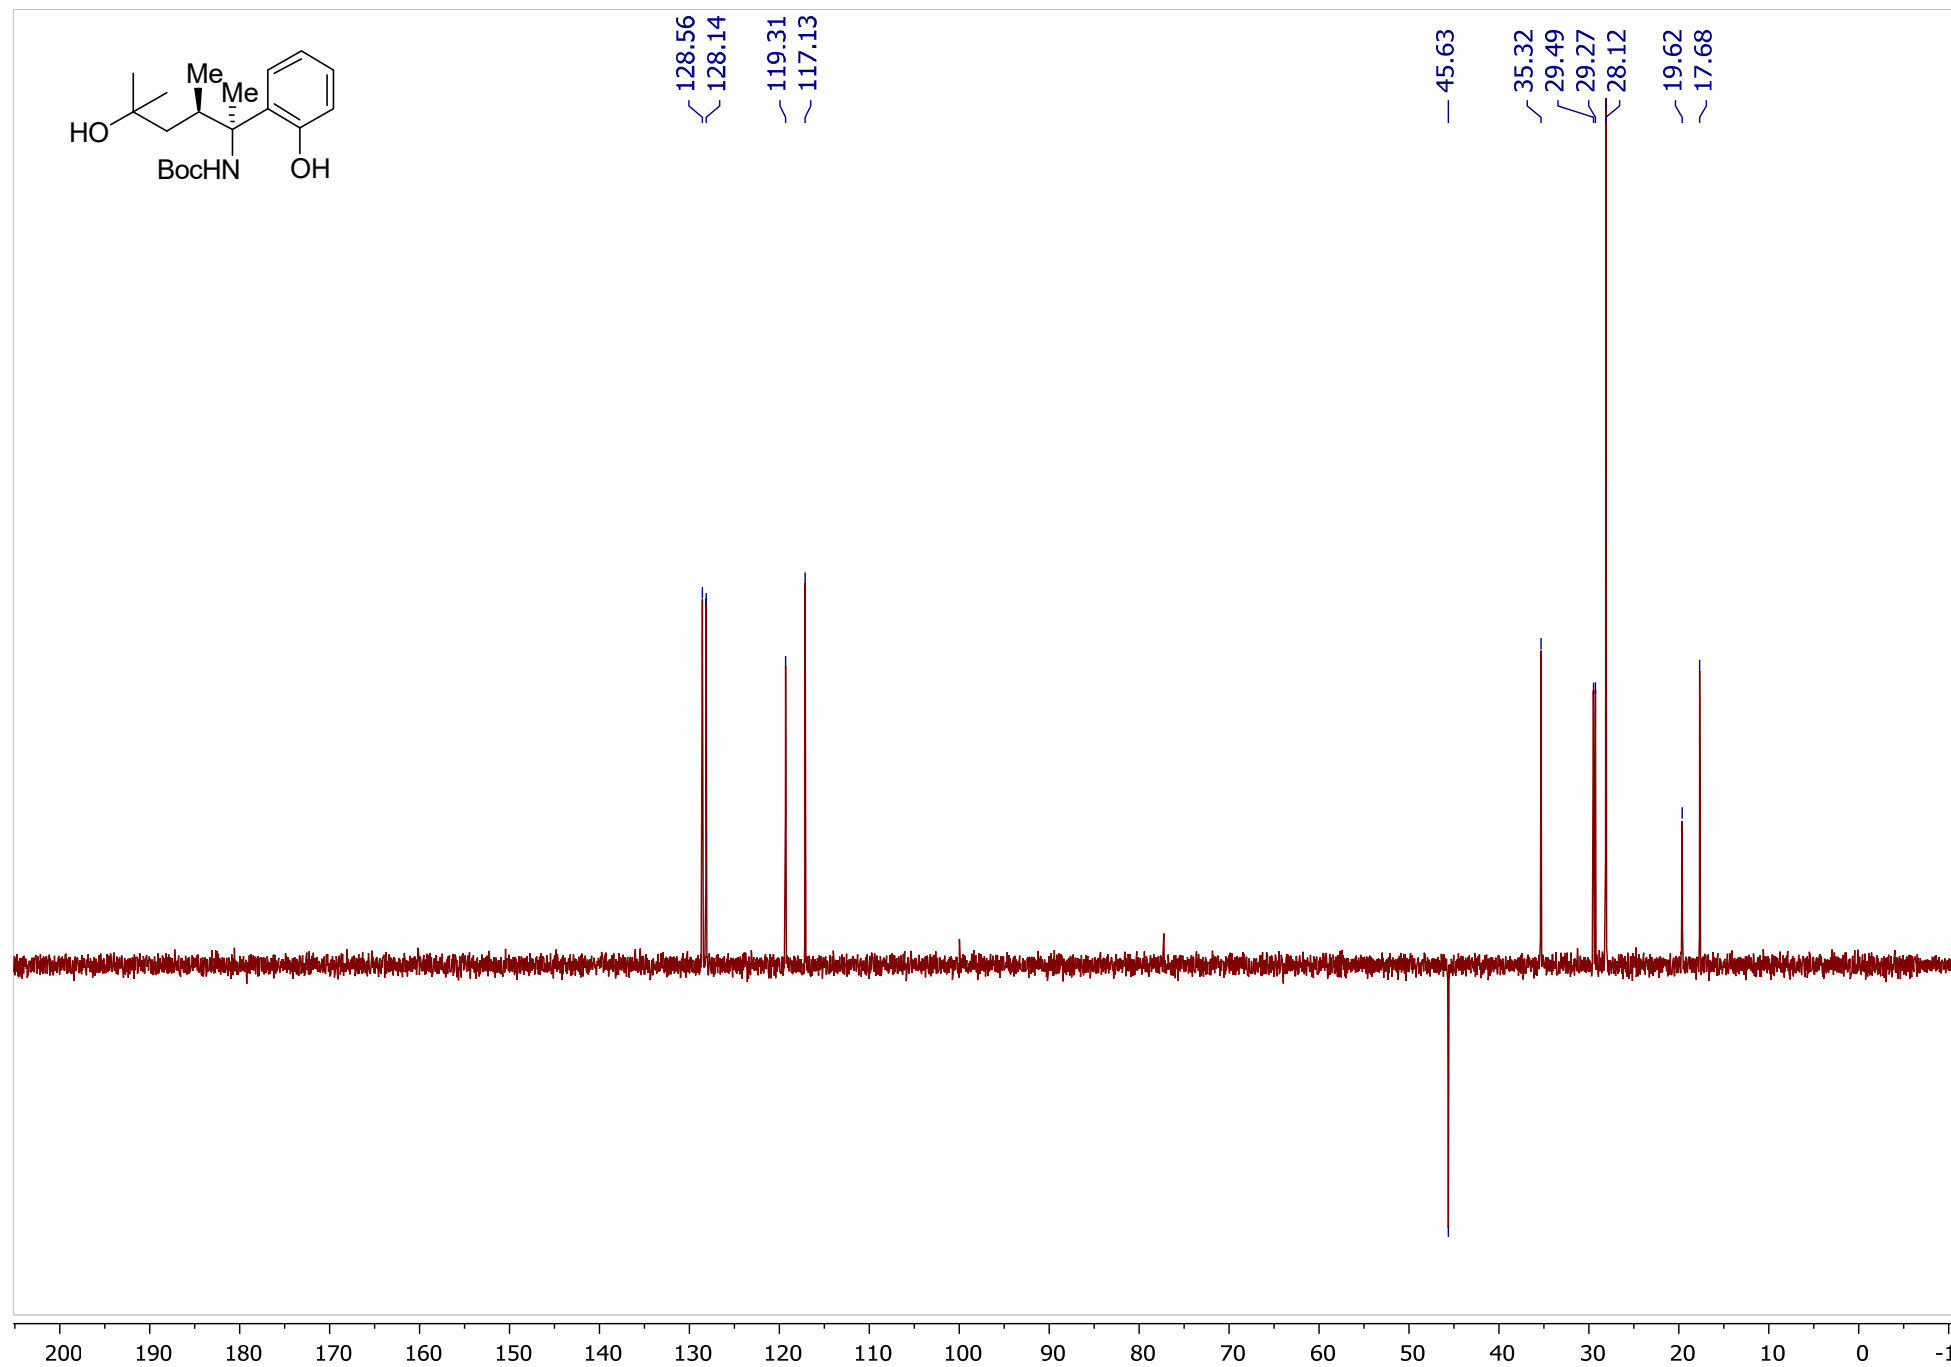

$^1\text{H}$ - $^1\text{H}$  COSY

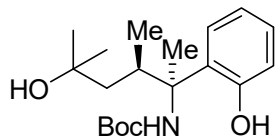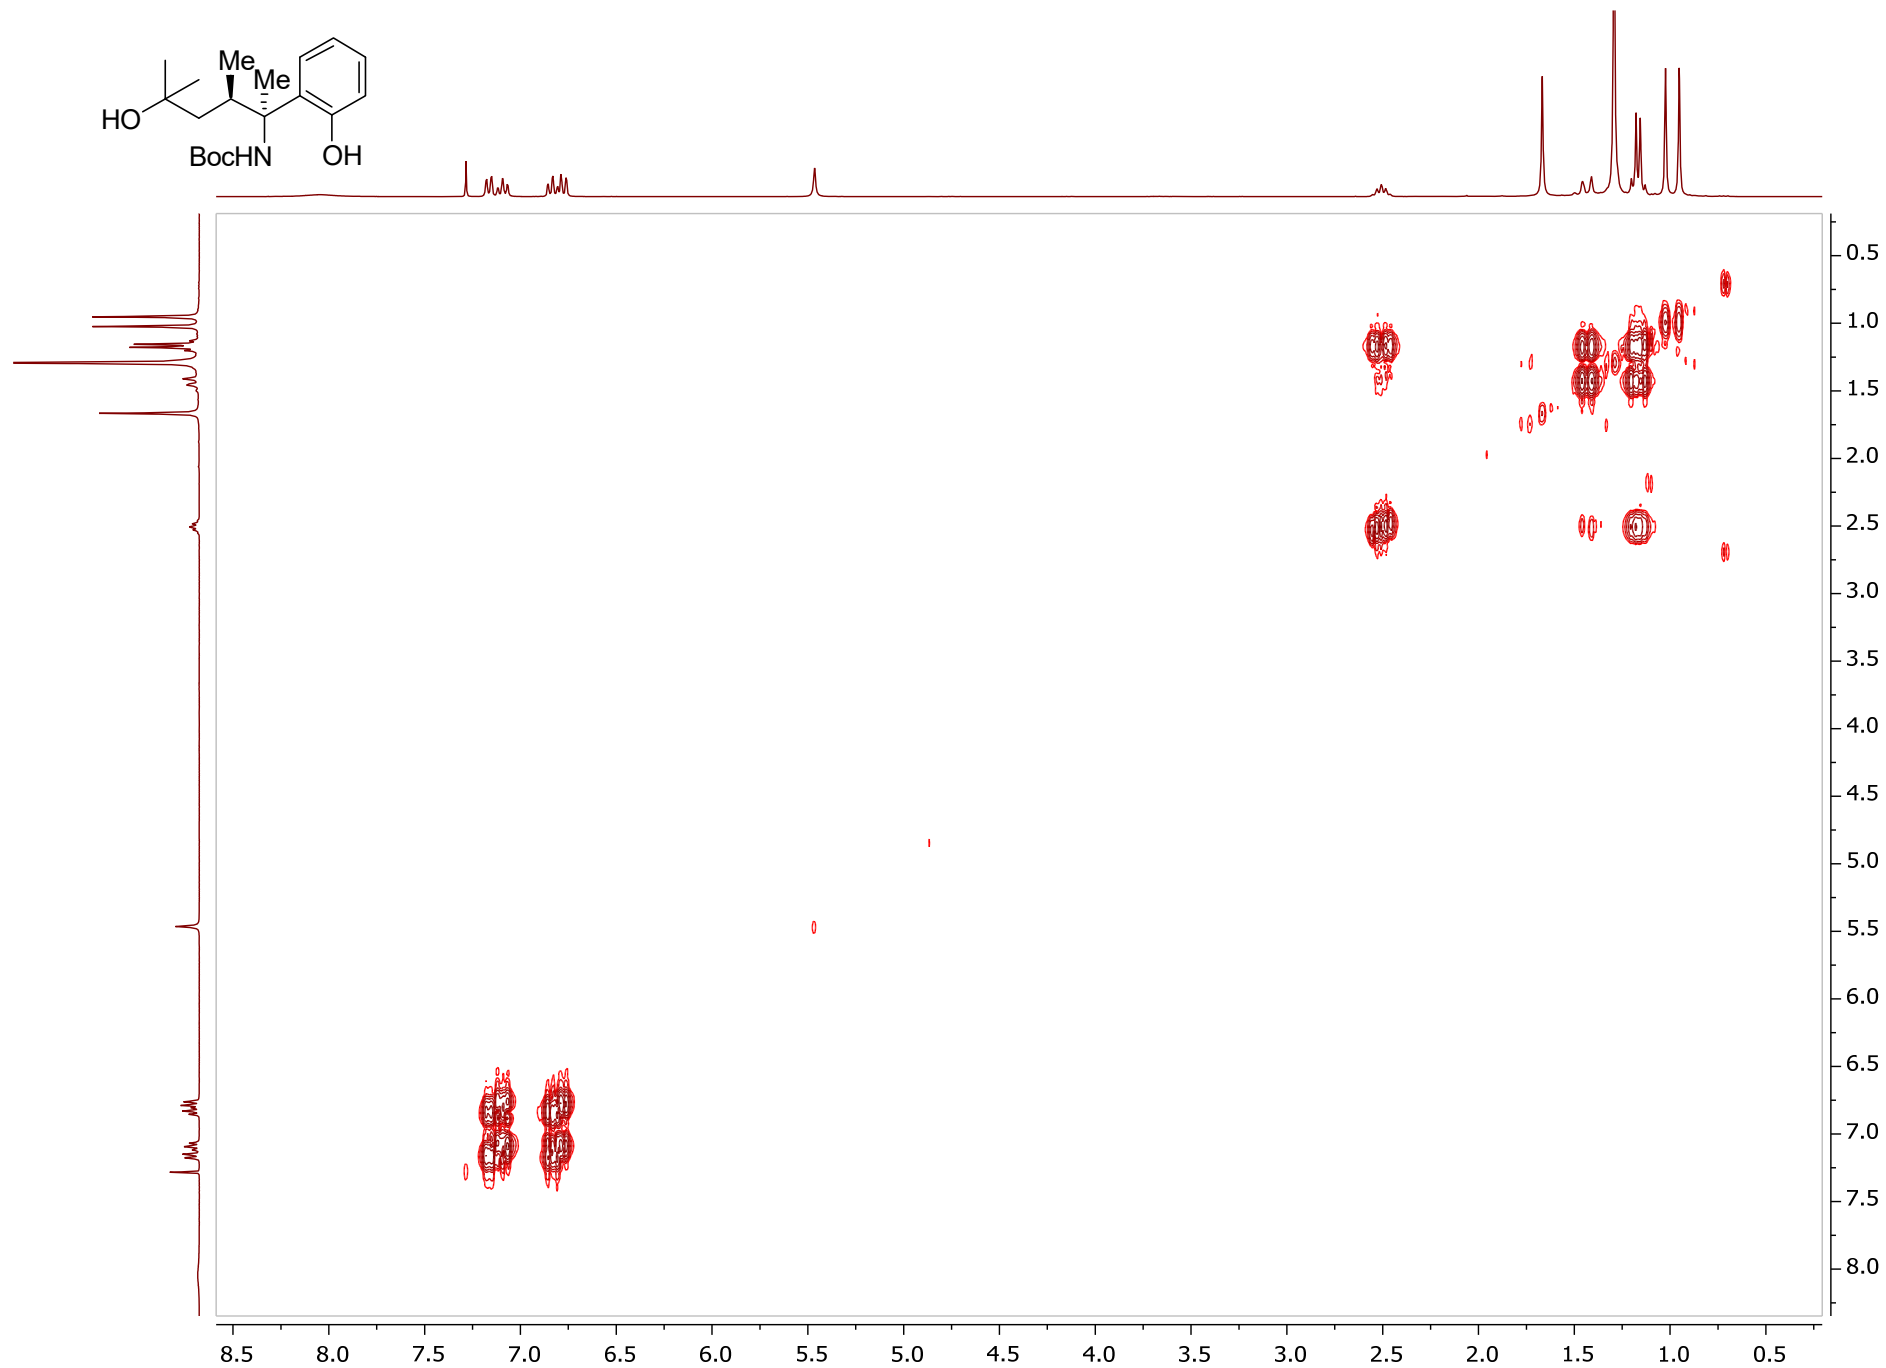



$^1\text{H}$ - $^{13}\text{C}$  HSQC

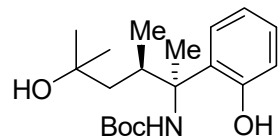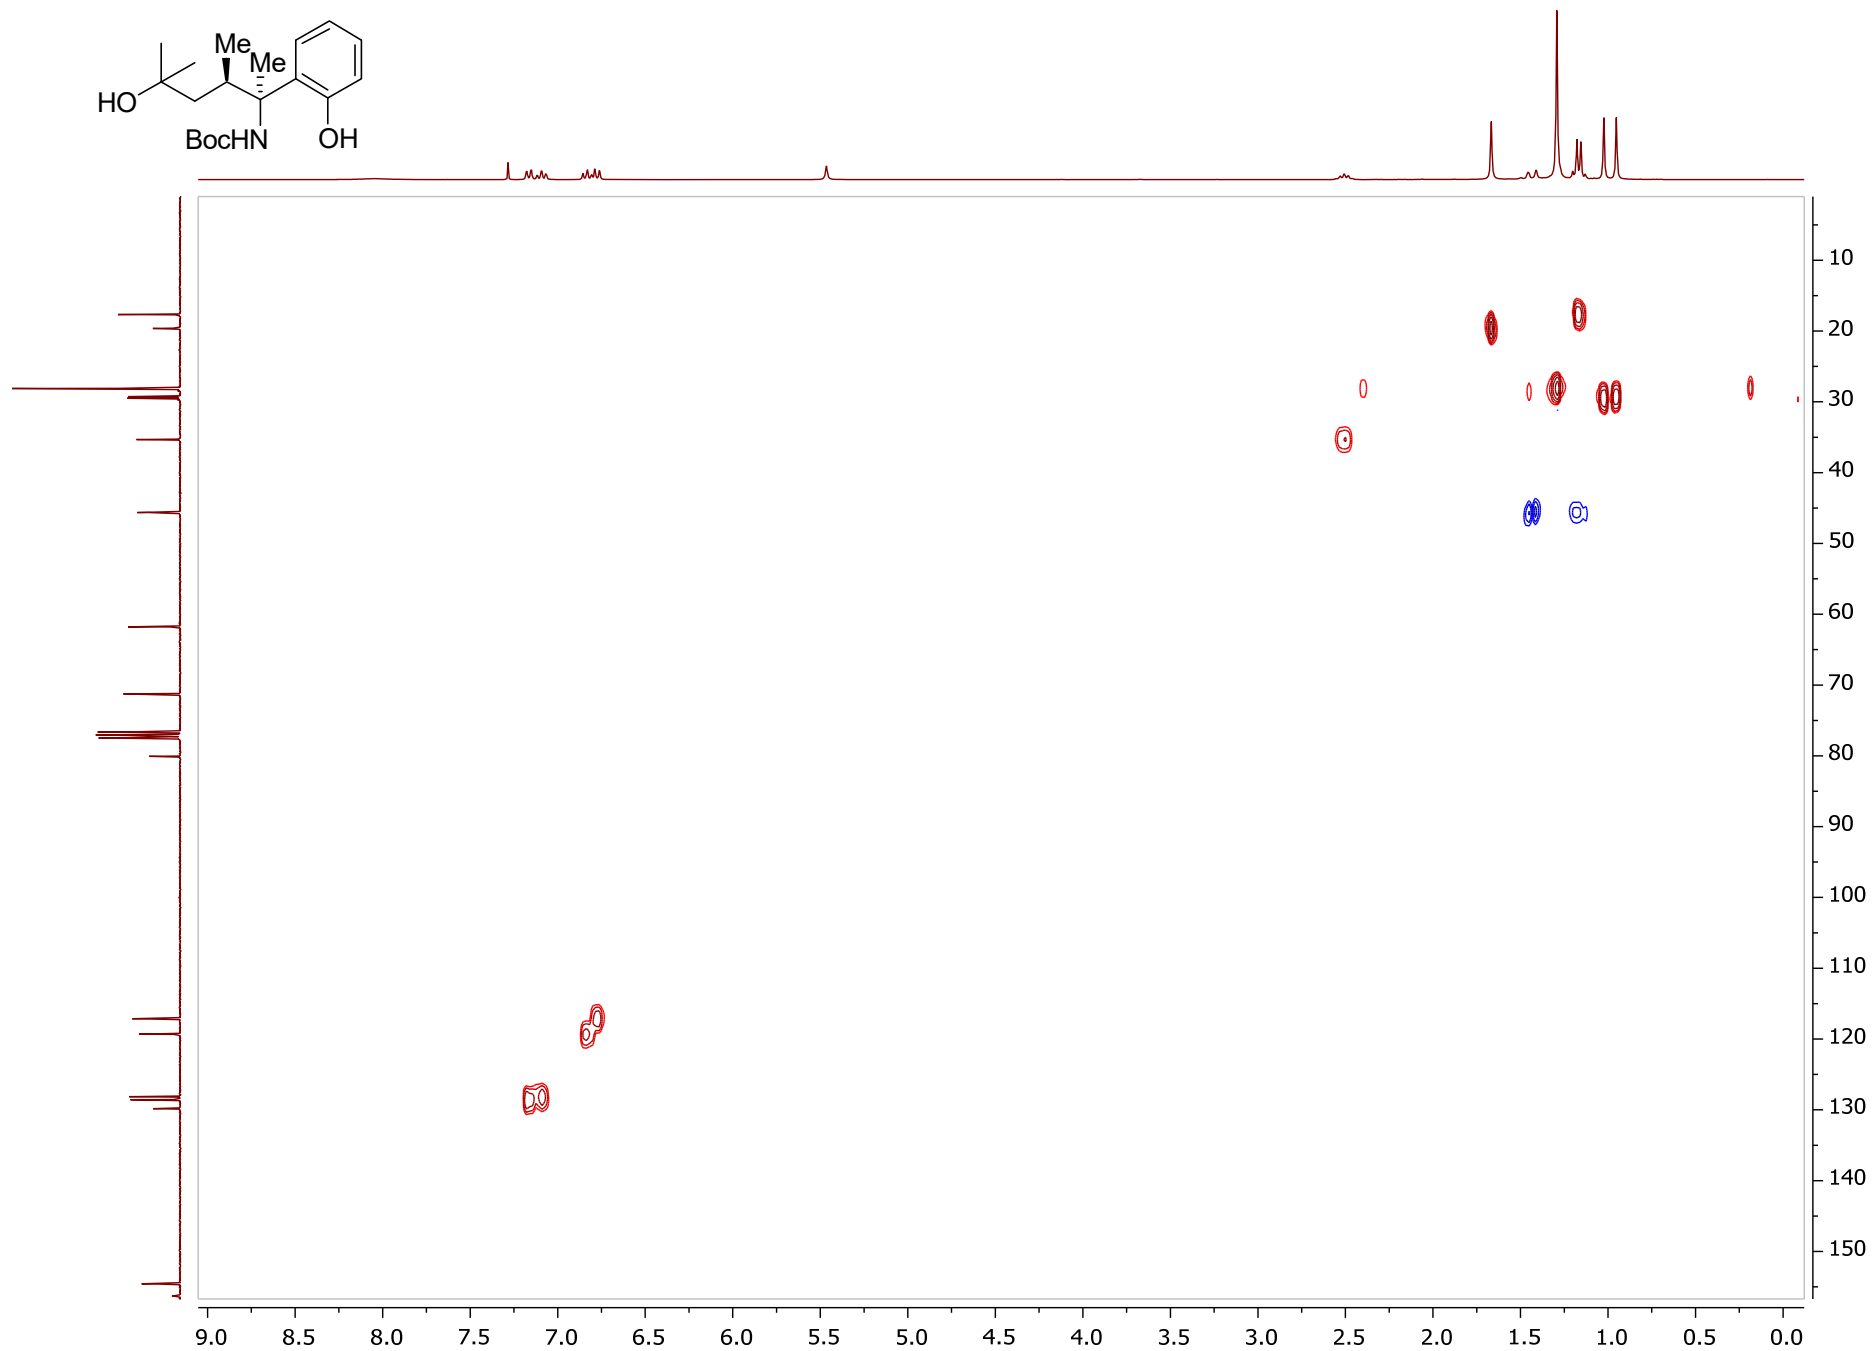

$^1\text{H}$ - $^{13}\text{C}$  HMBC

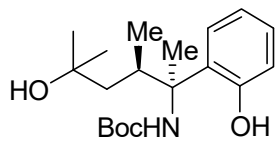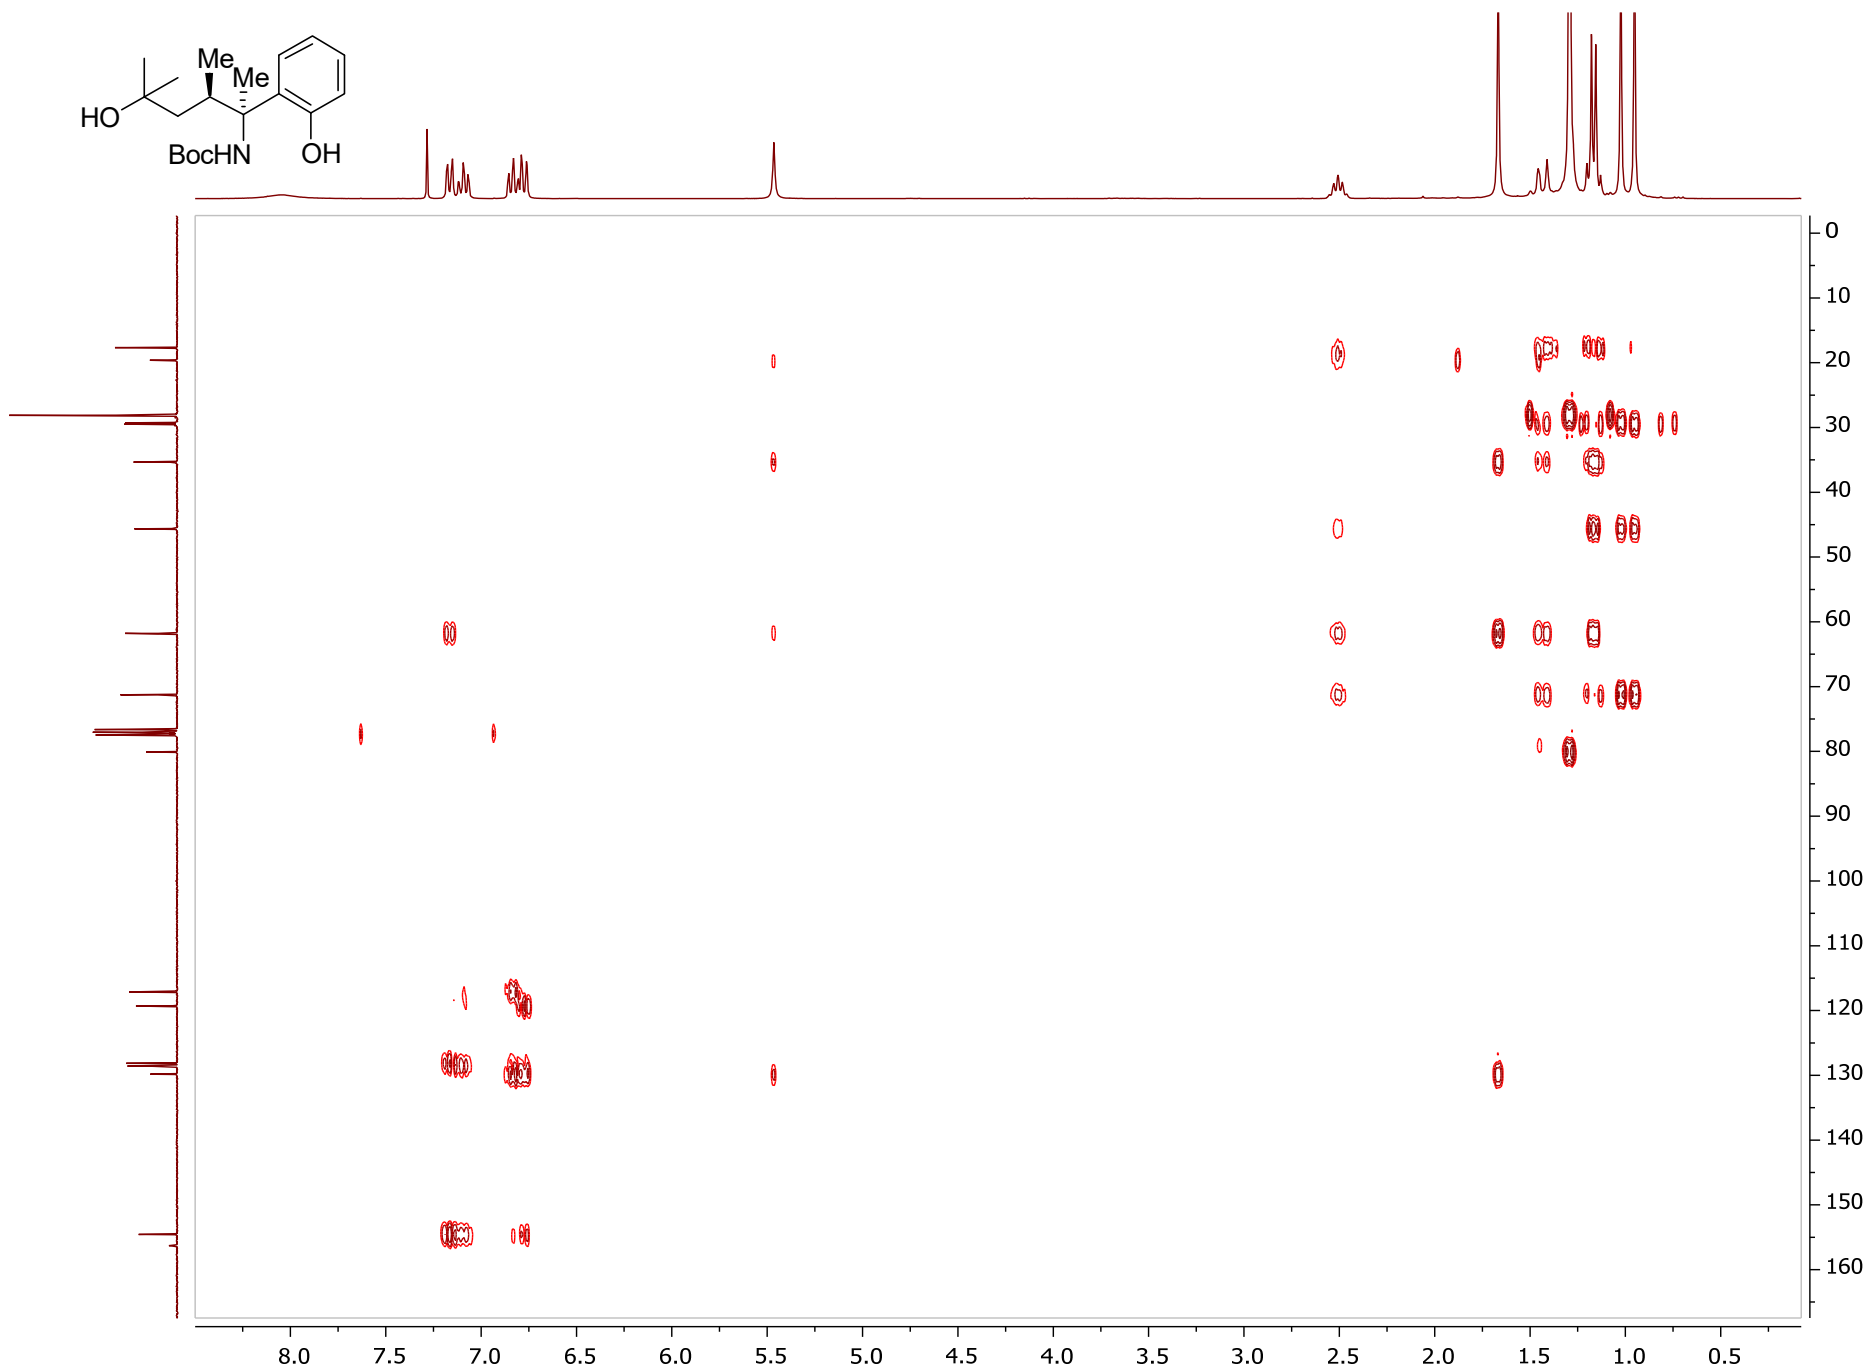

***tert*-Butyl (2*S*\*,3*S*\*,5*R*\*)-5-hydroxy-2-(2-hydroxyphenyl)-3-(4-methoxyphenyl)-5-phenylpentan-2-ylcarbamate 7ja**

<sup>1</sup>H NMR (300 MHz, CDCl<sub>3</sub>)

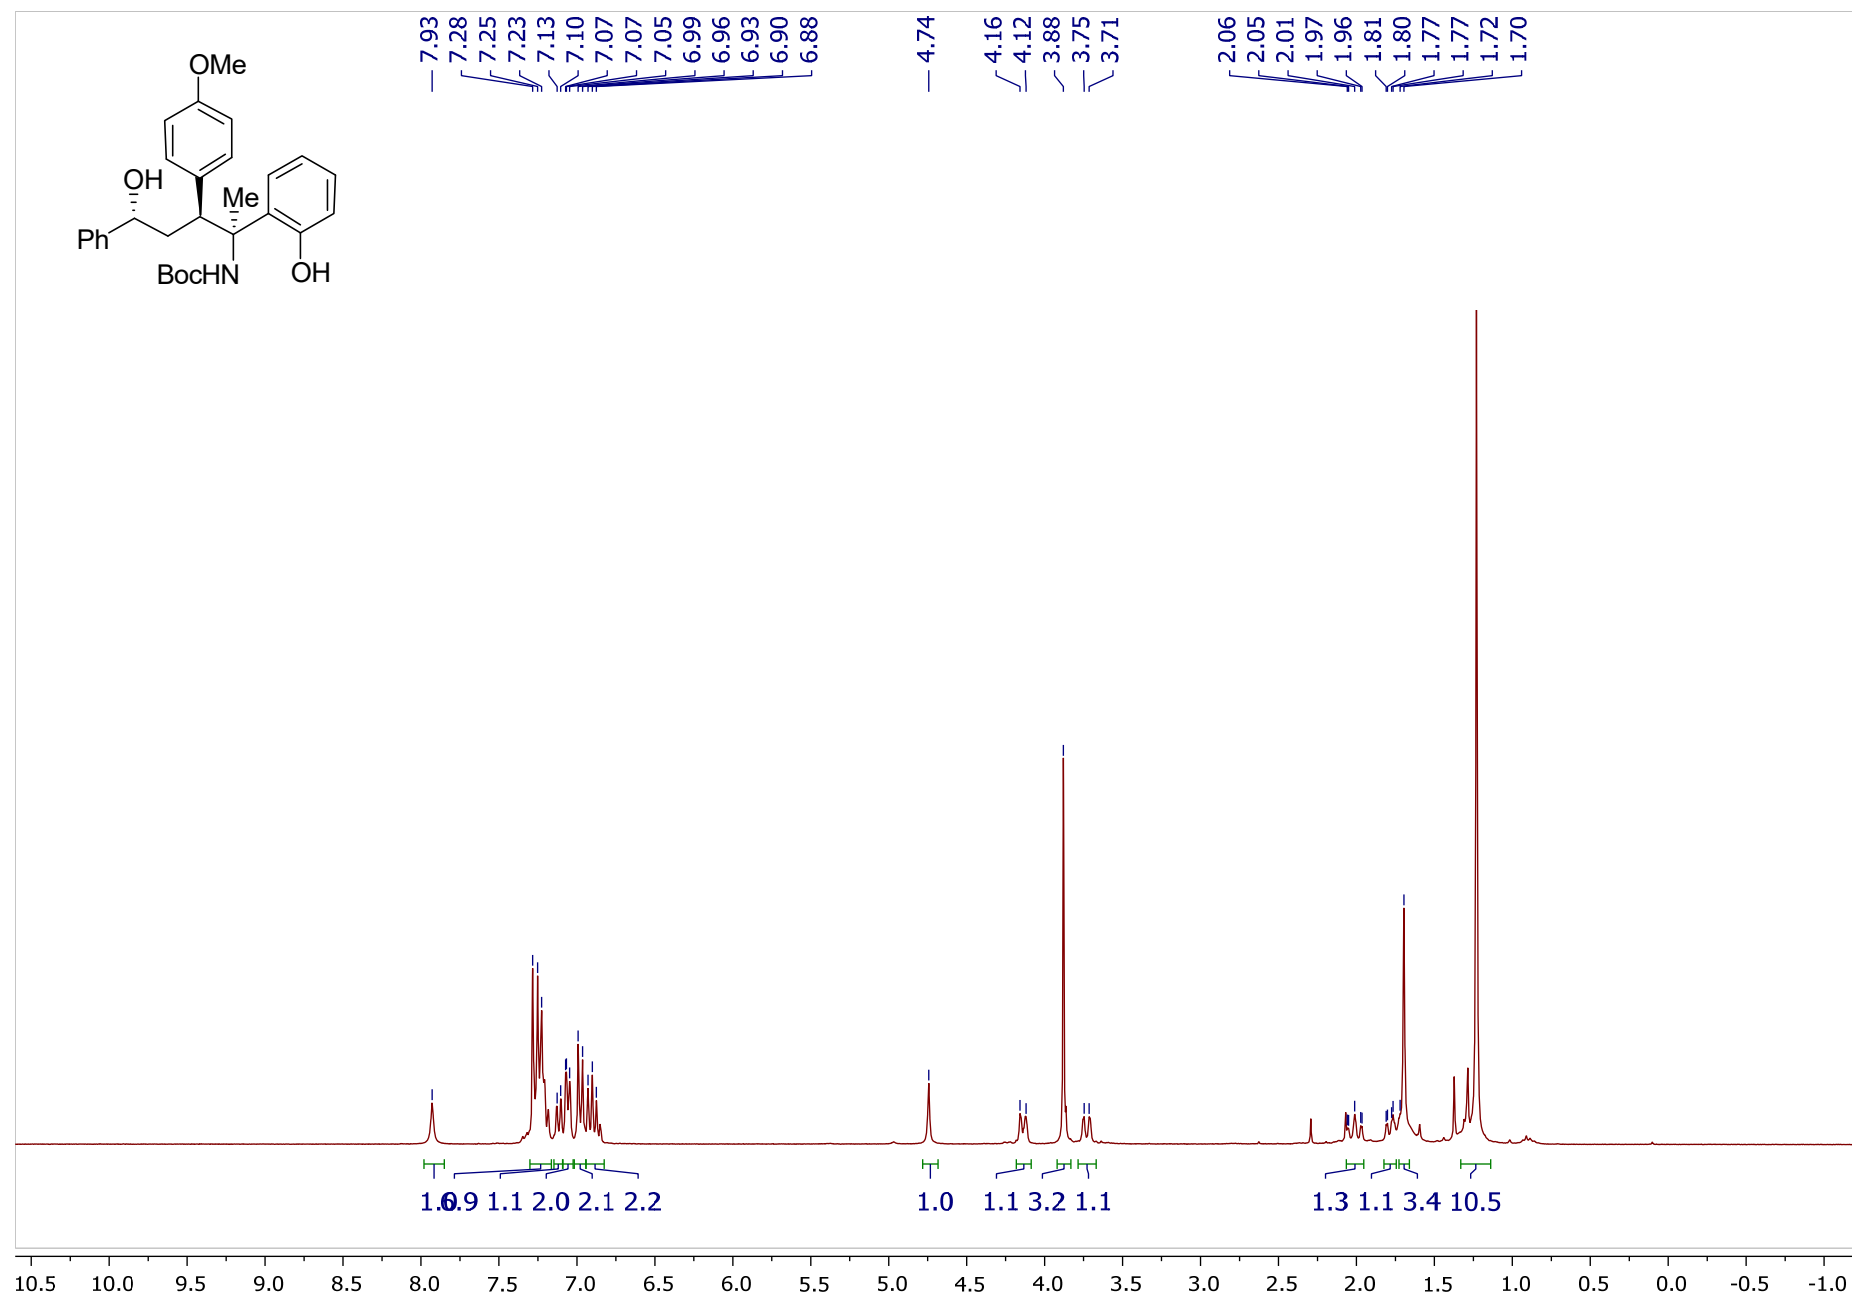

$^{13}\text{C}$  NMR (75 MHz,  $\text{CDCl}_3$ )

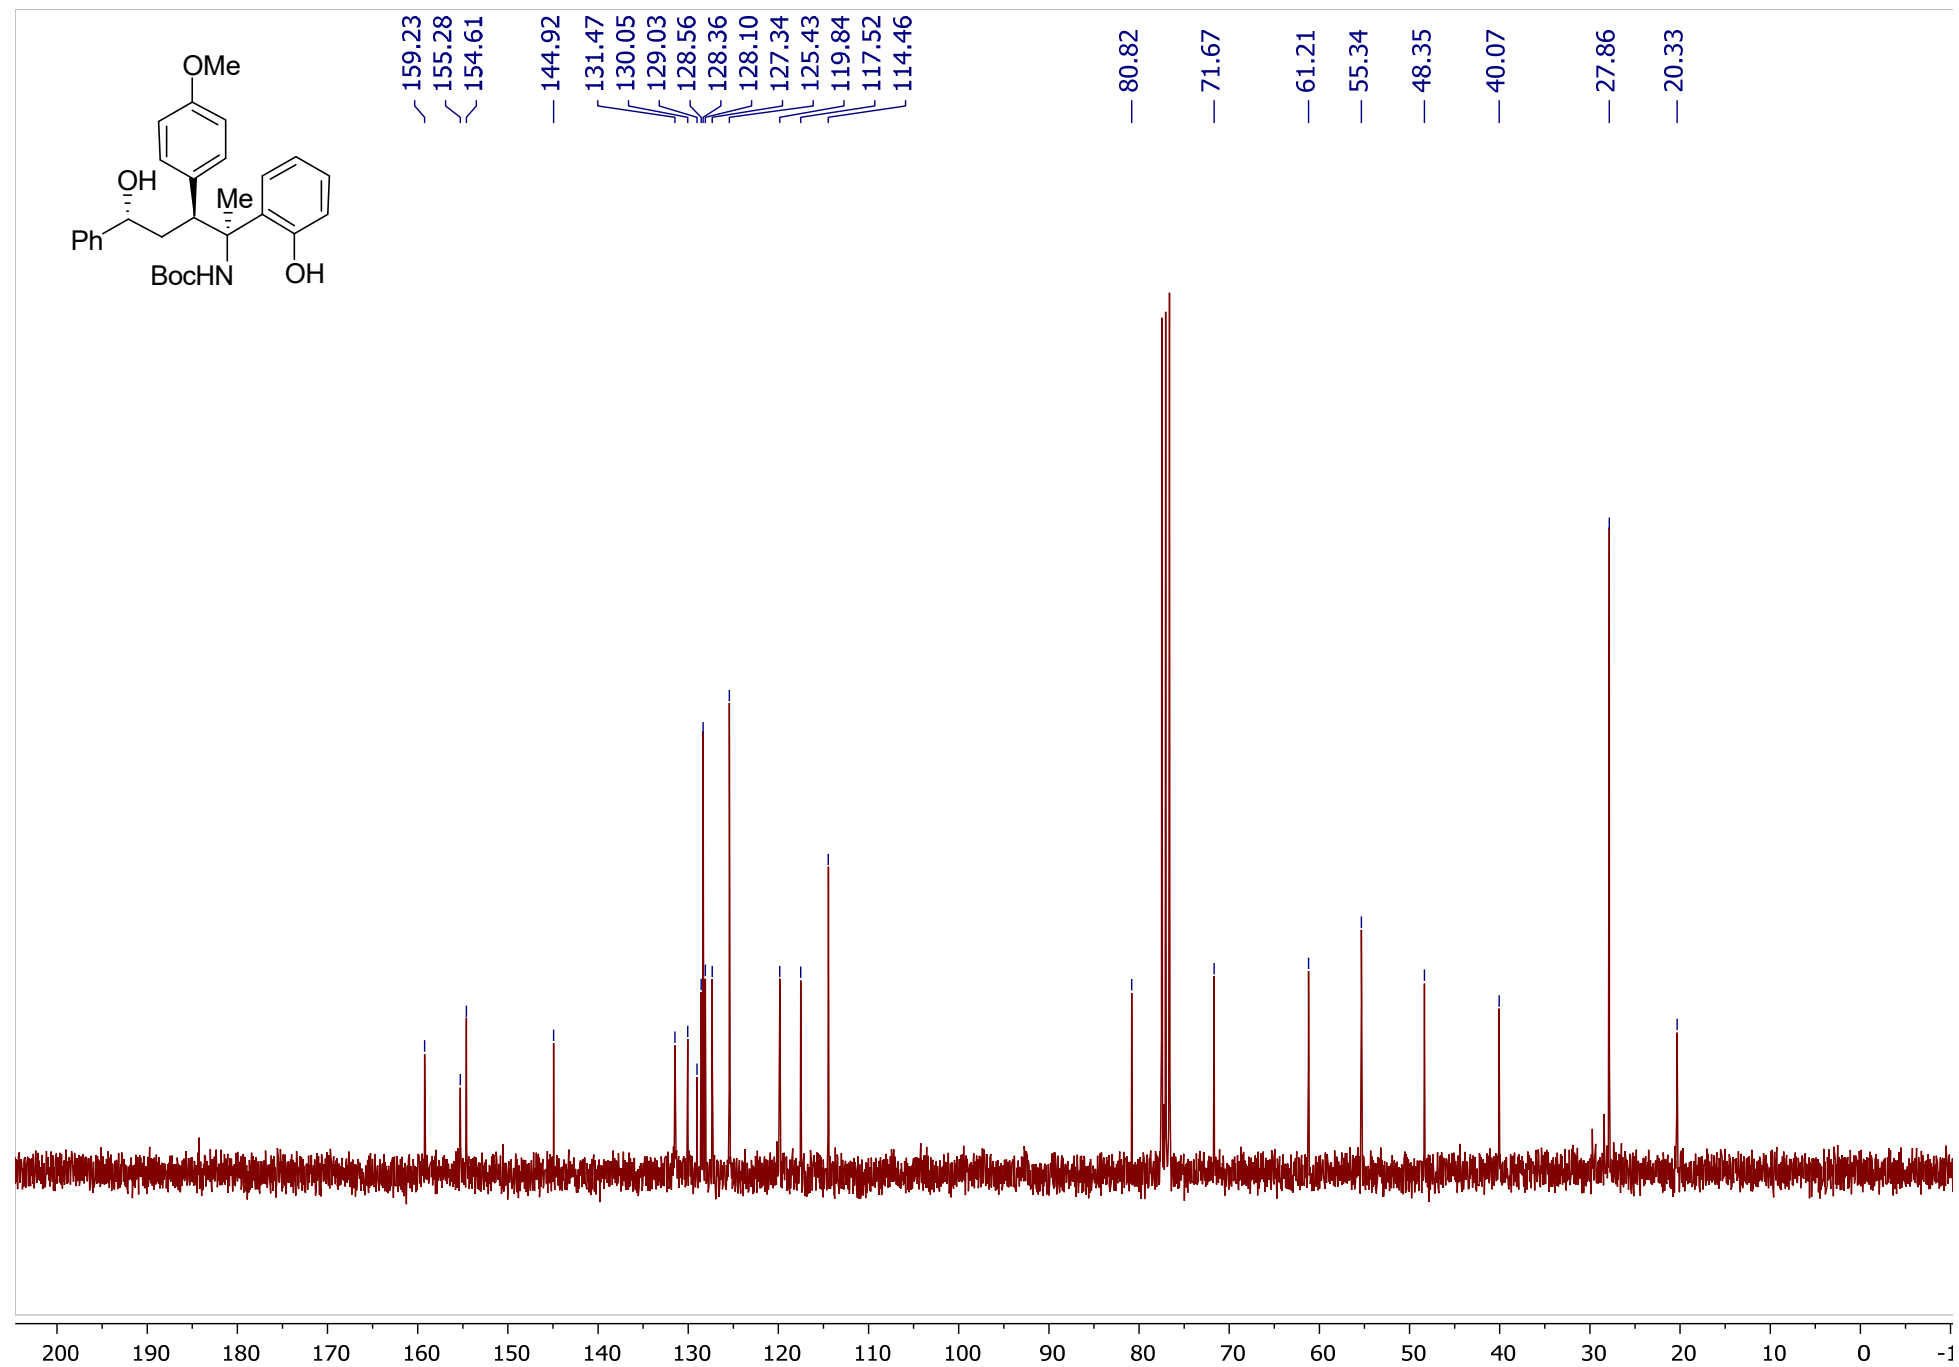

$^{13}\text{C}$  DEPT 135 (75 MHz,  $\text{CDCl}_3$ )

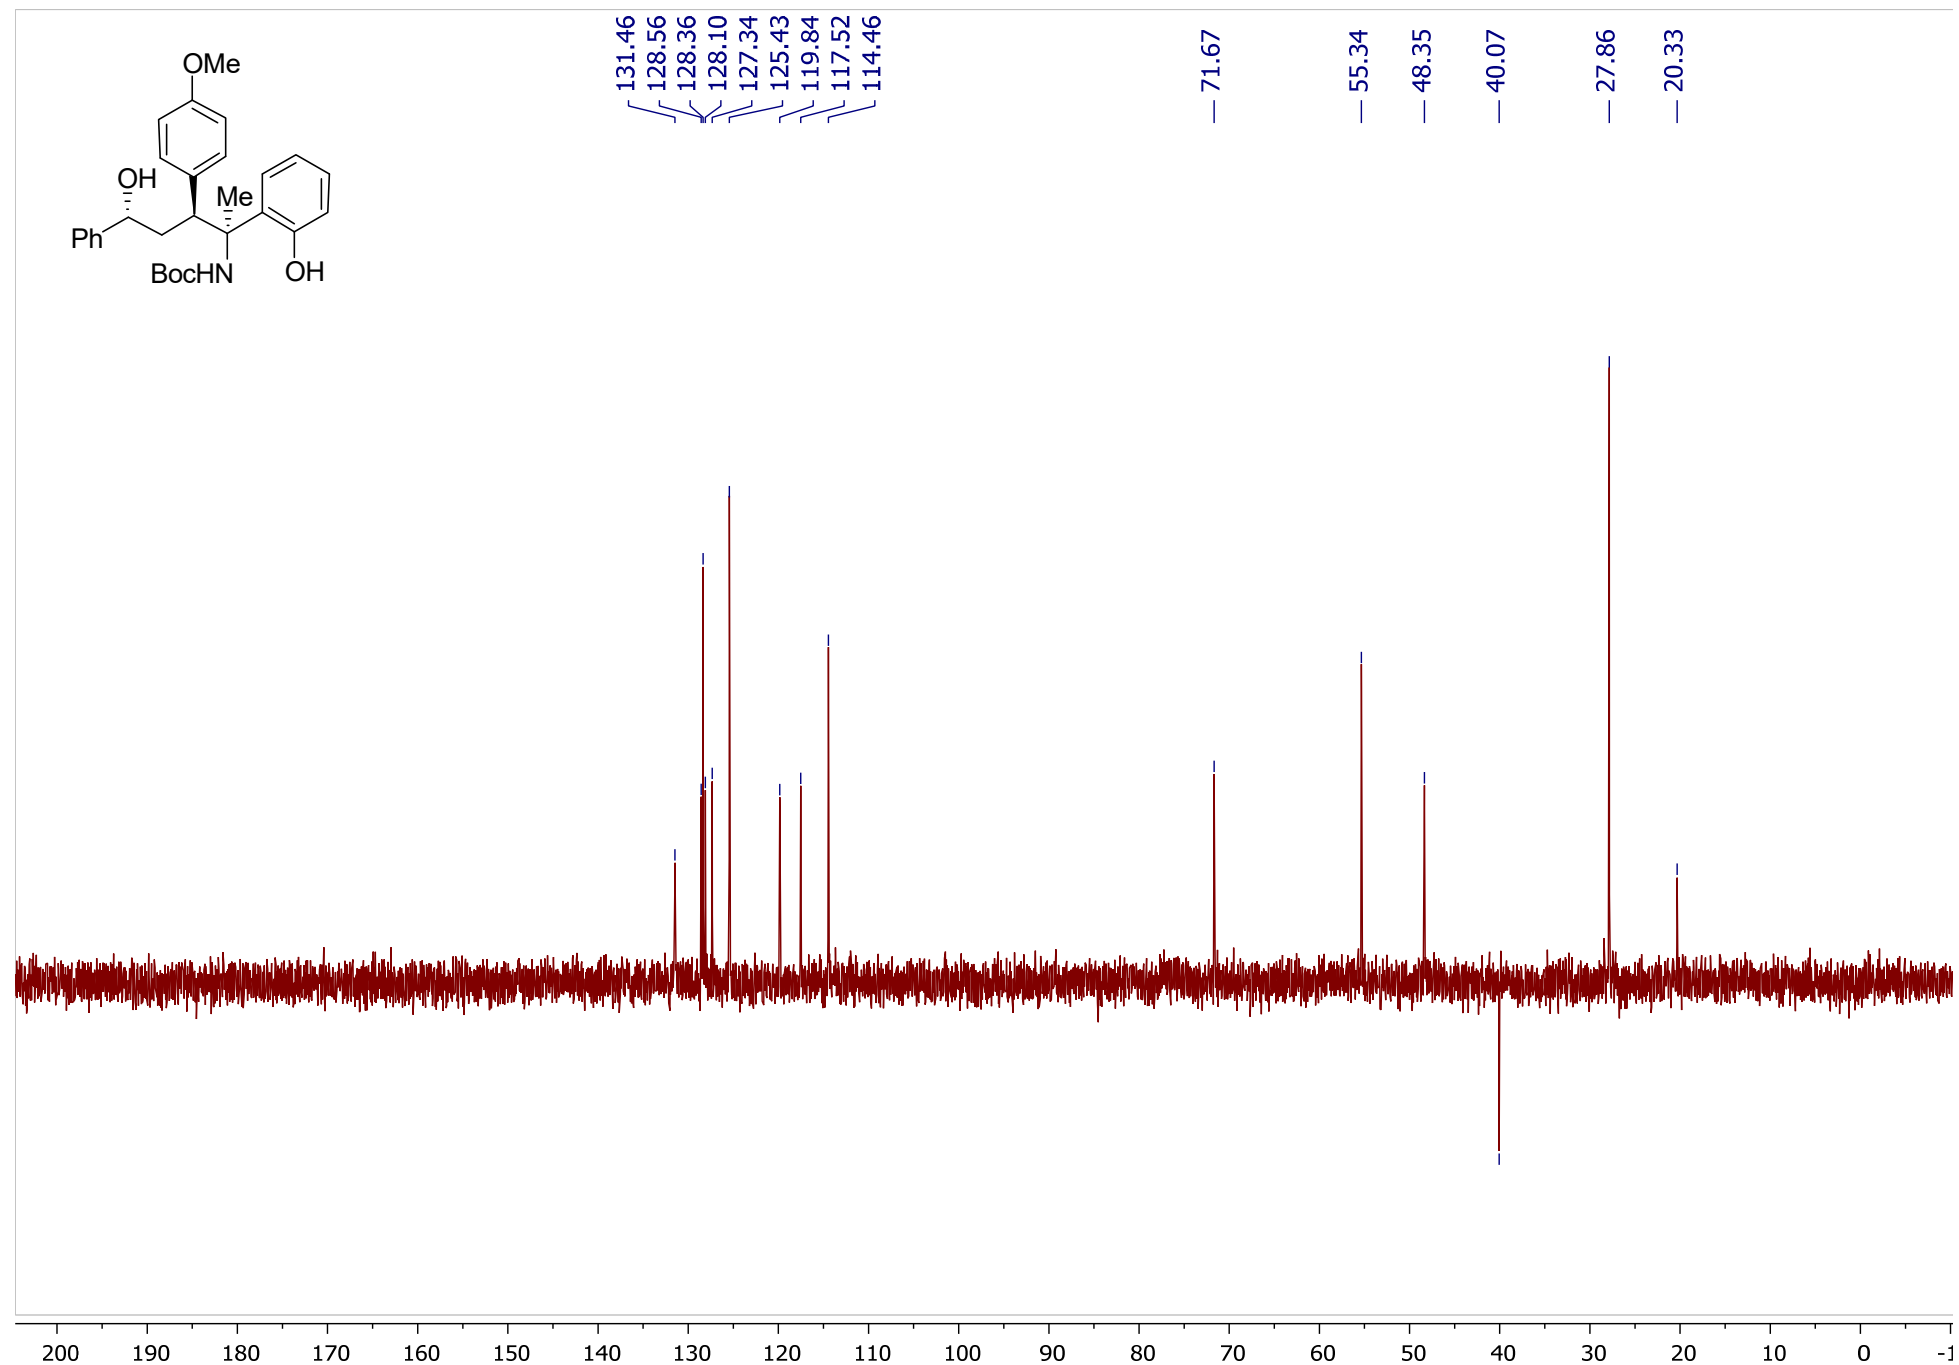

$^1\text{H}$ - $^1\text{H}$  COSY

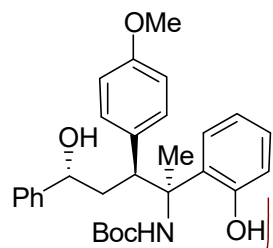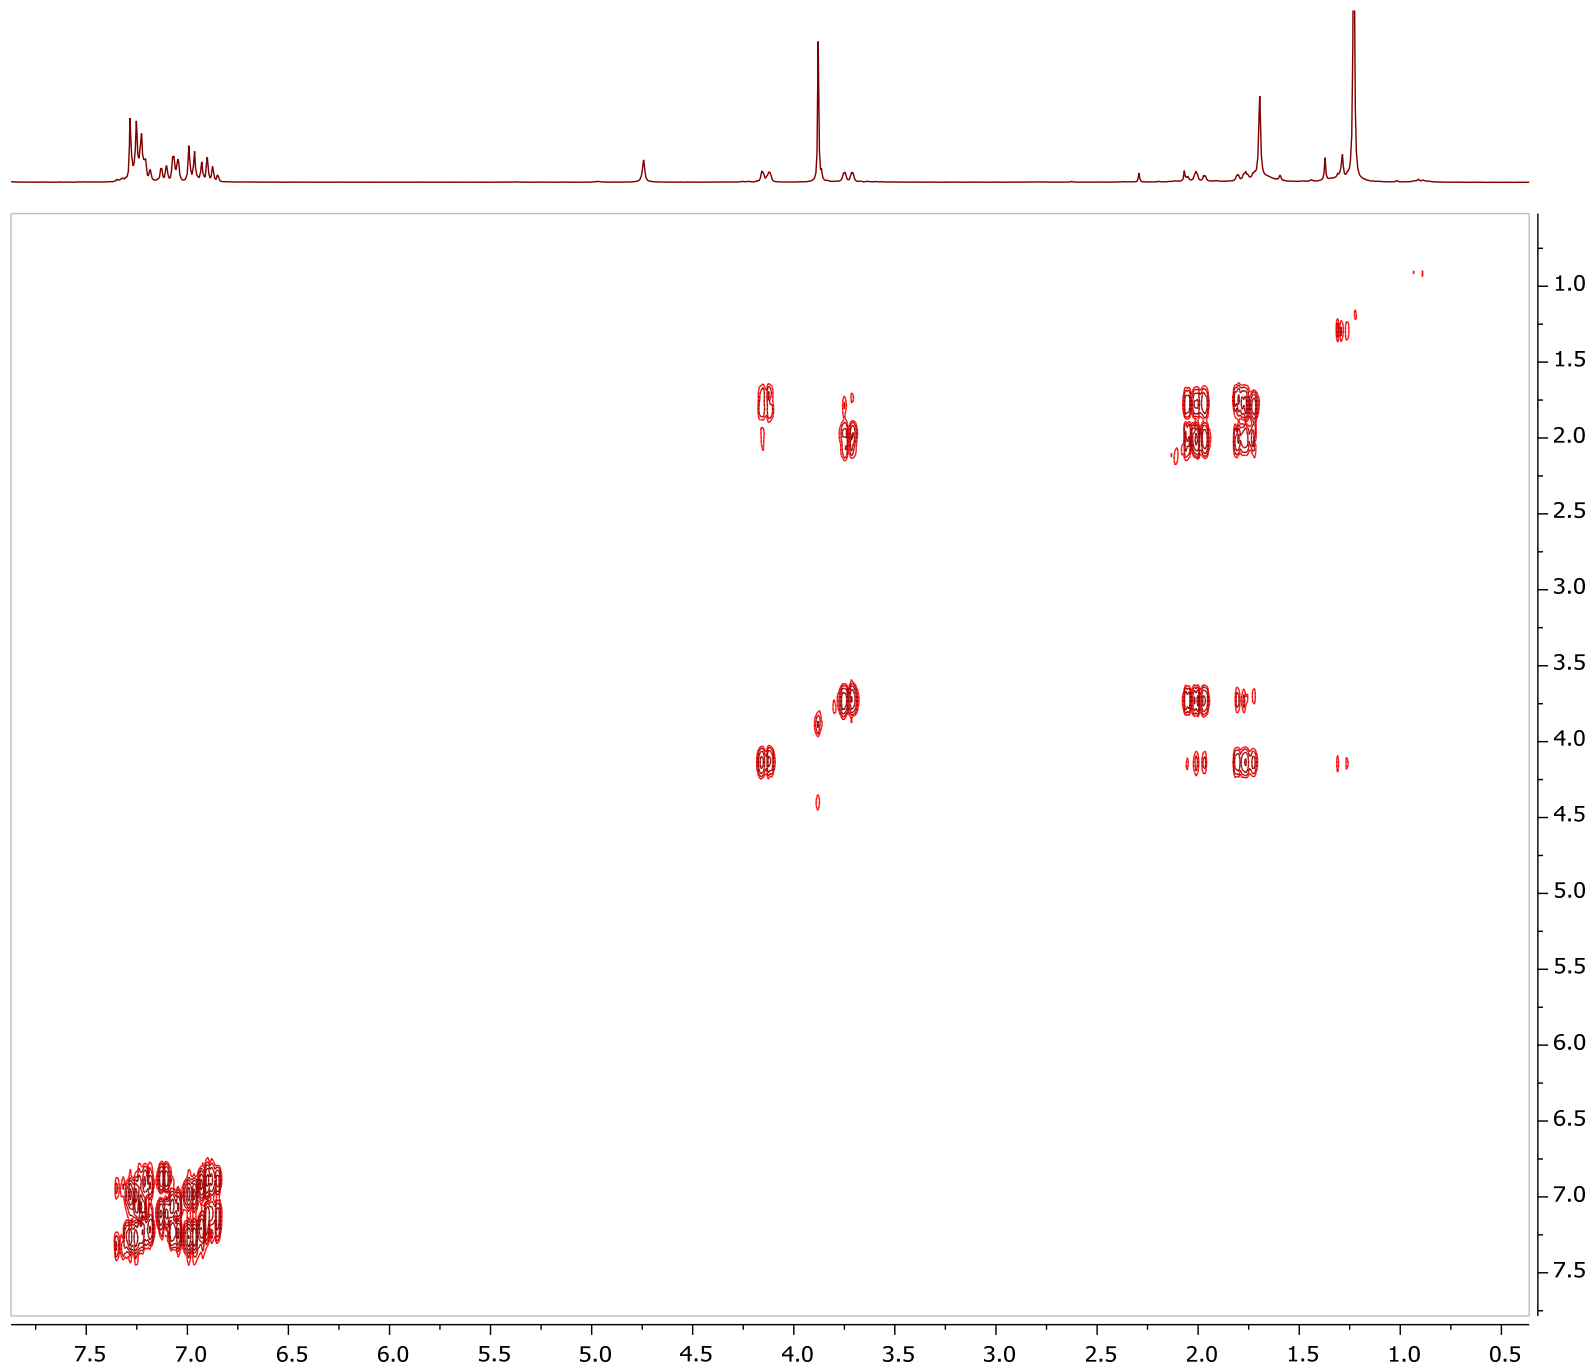

$^1\text{H}$ - $^{13}\text{C}$  HSQC

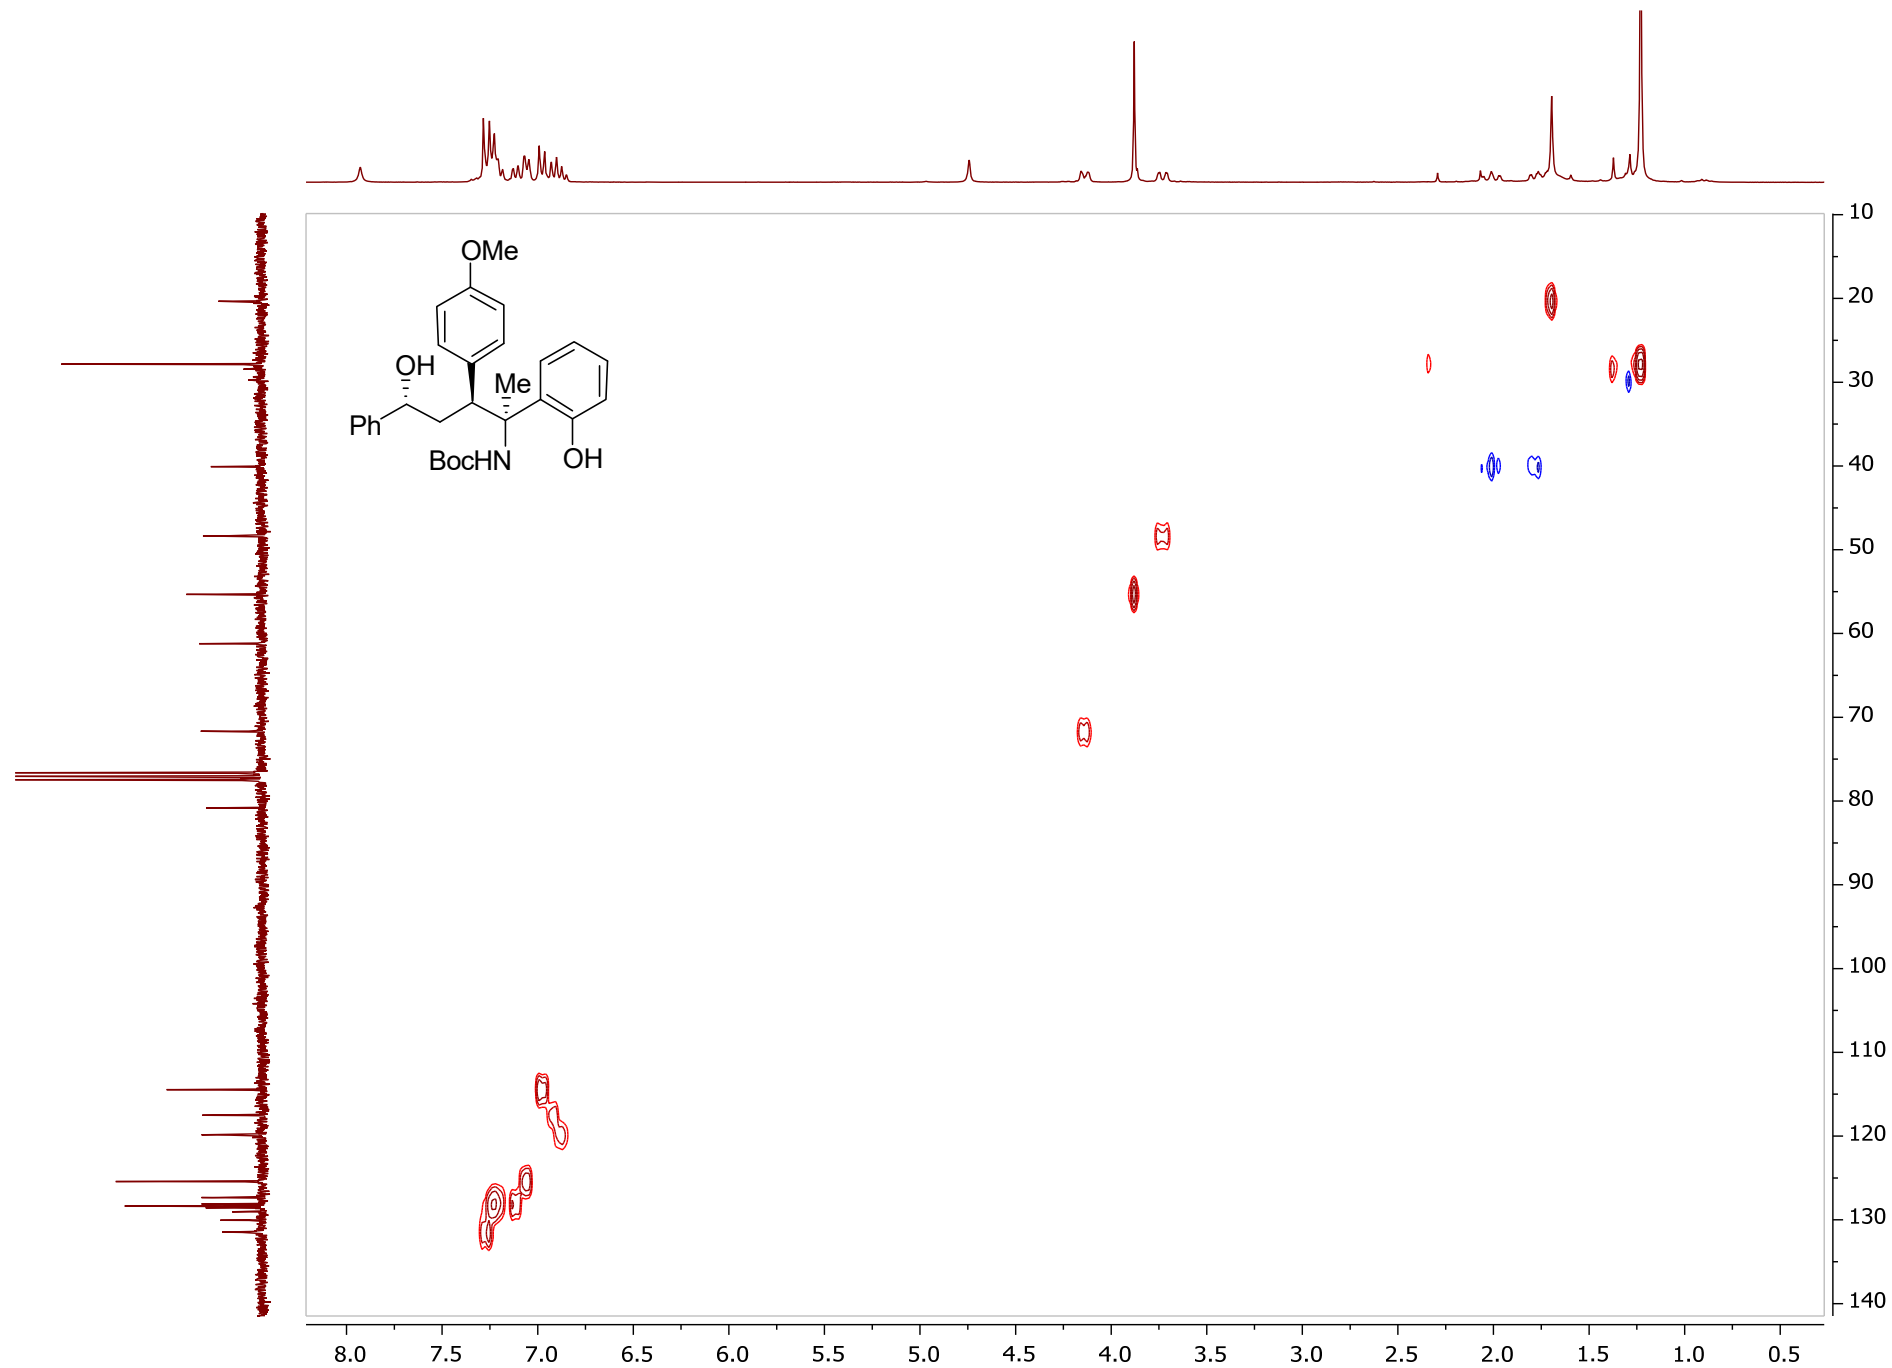

$^1\text{H}$ - $^{13}\text{C}$  HMBC

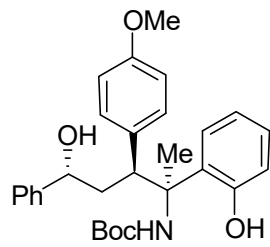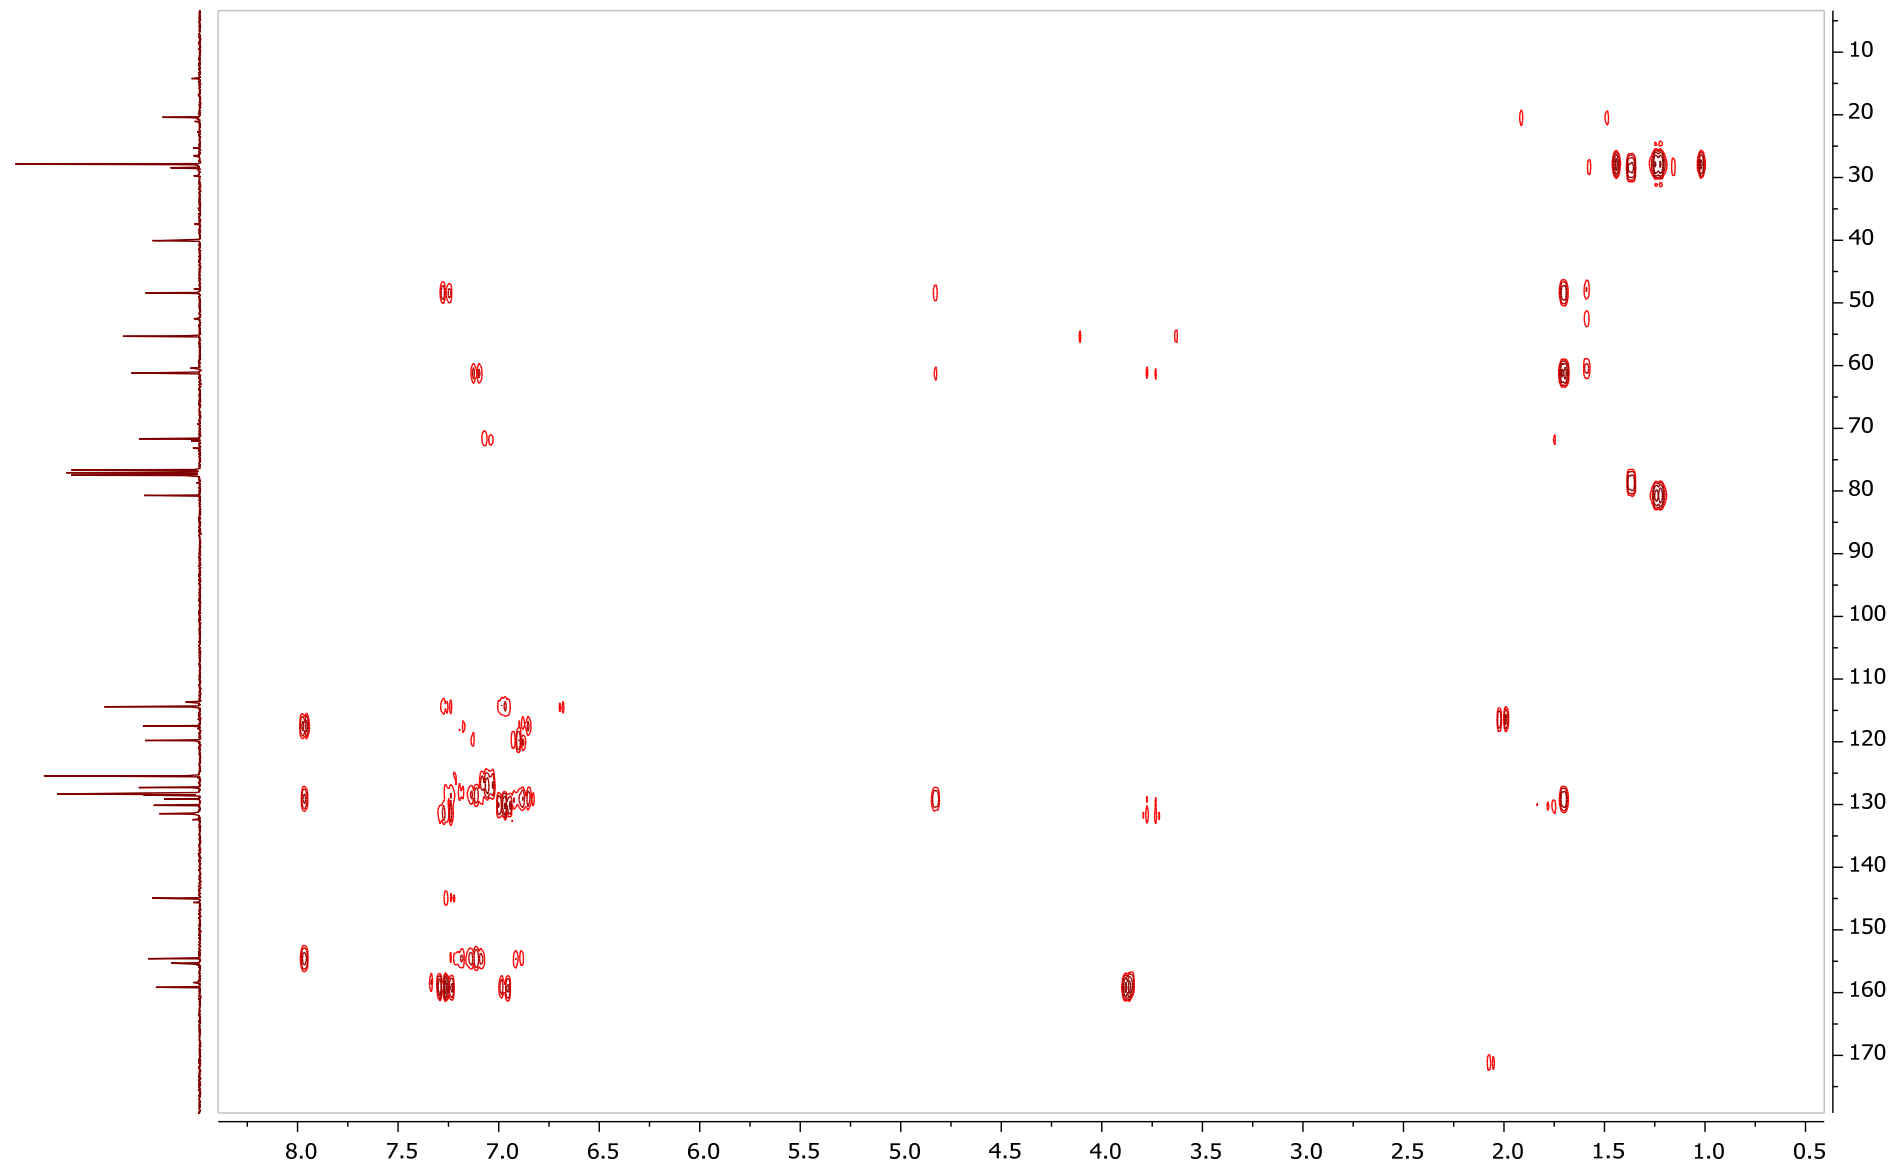



**tert-Butyl ((1S\*,2S\*)-1-((1R\*,2R\*)-2-hydroxycyclohexyl)-2-(2-hydroxyphenyl)-1-(4-methoxyphenyl)propan-2-yl)carbamate 71a**

<sup>1</sup>H NMR (300 MHz, CDCl<sub>3</sub>)

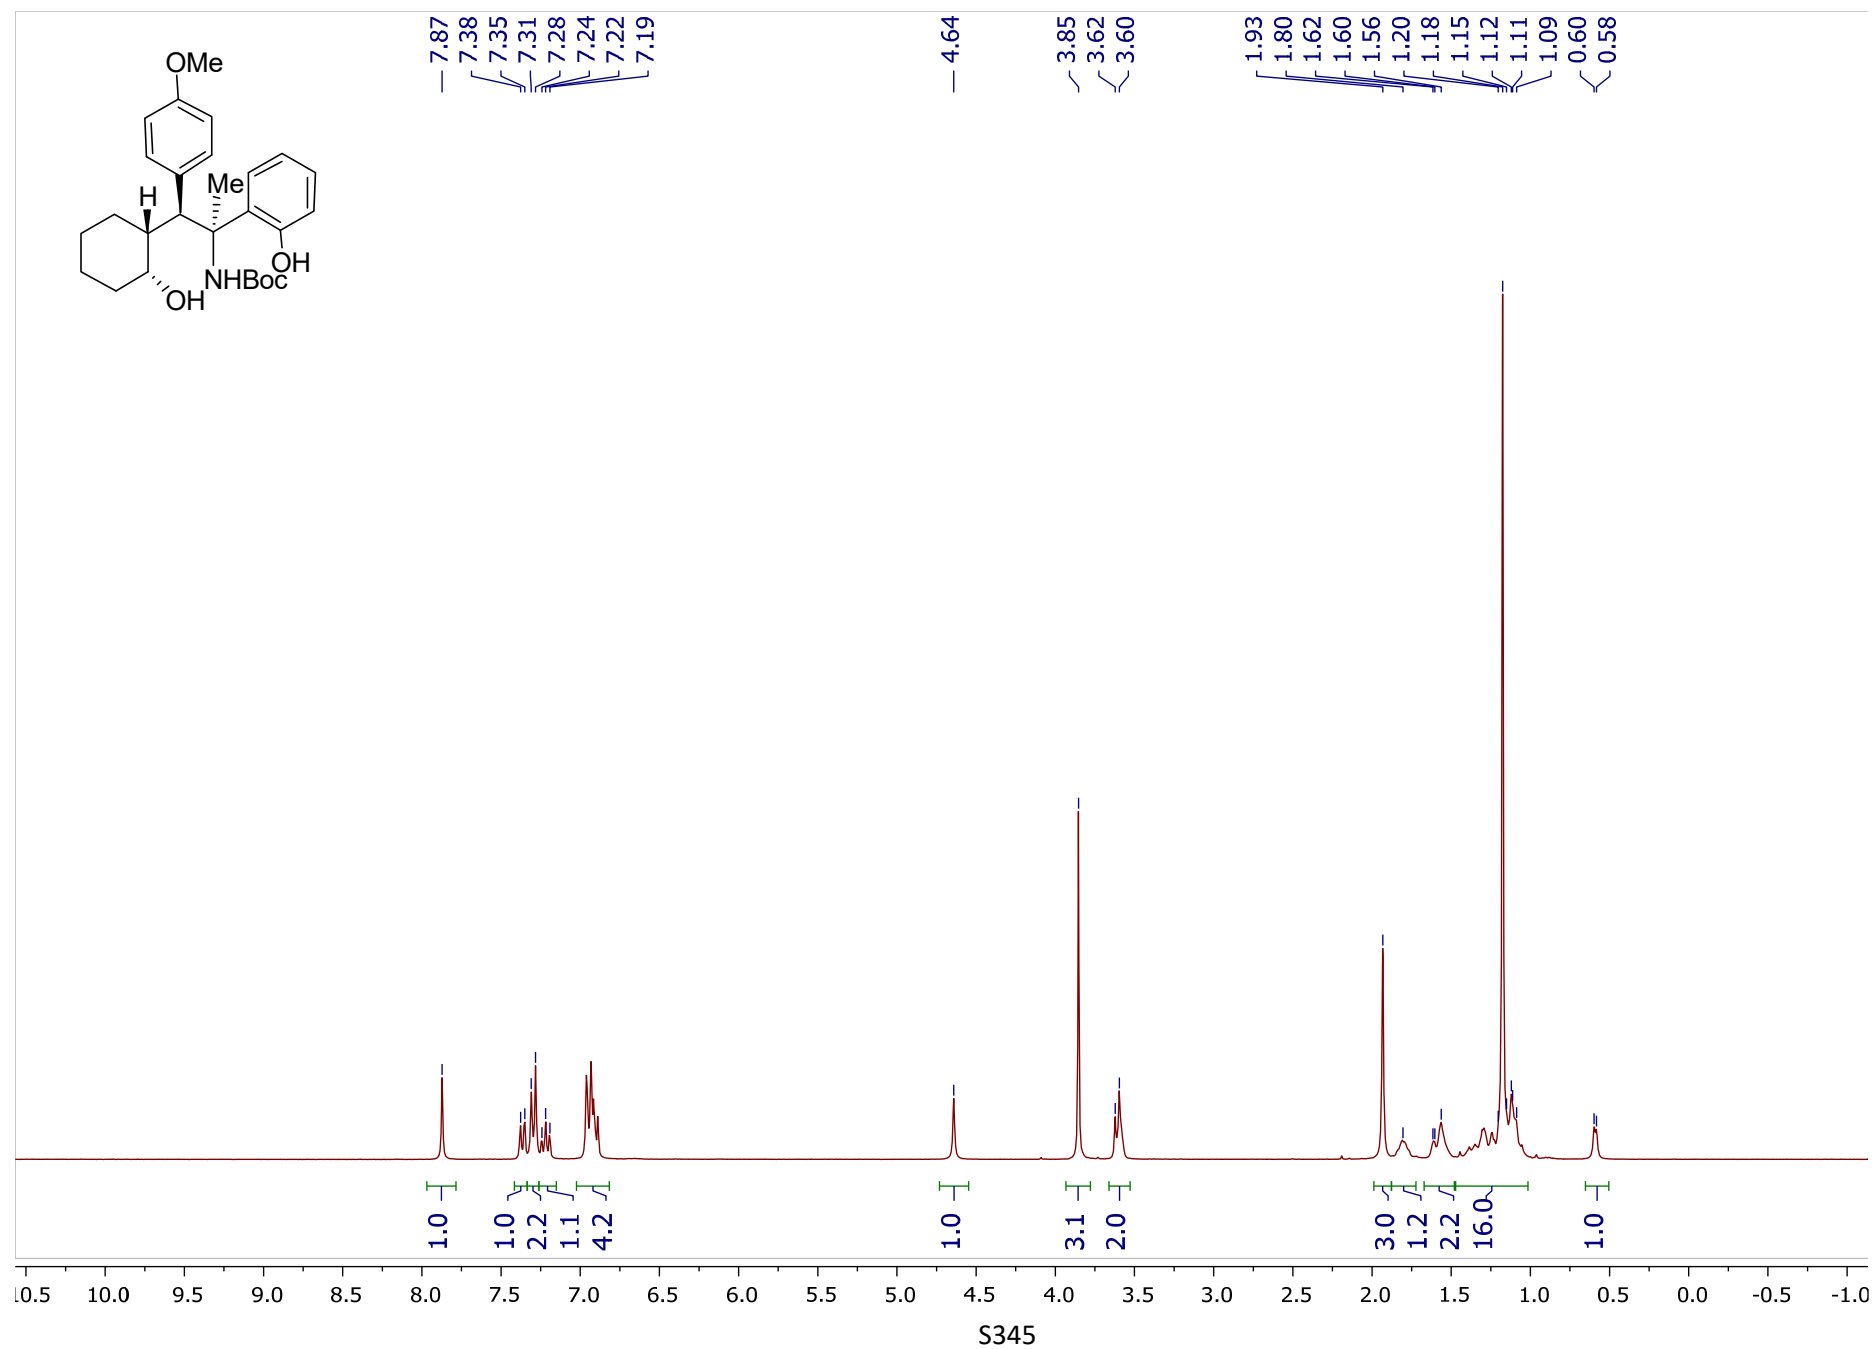

<sup>13</sup>C NMR (75 MHz, CDCl<sub>3</sub>)

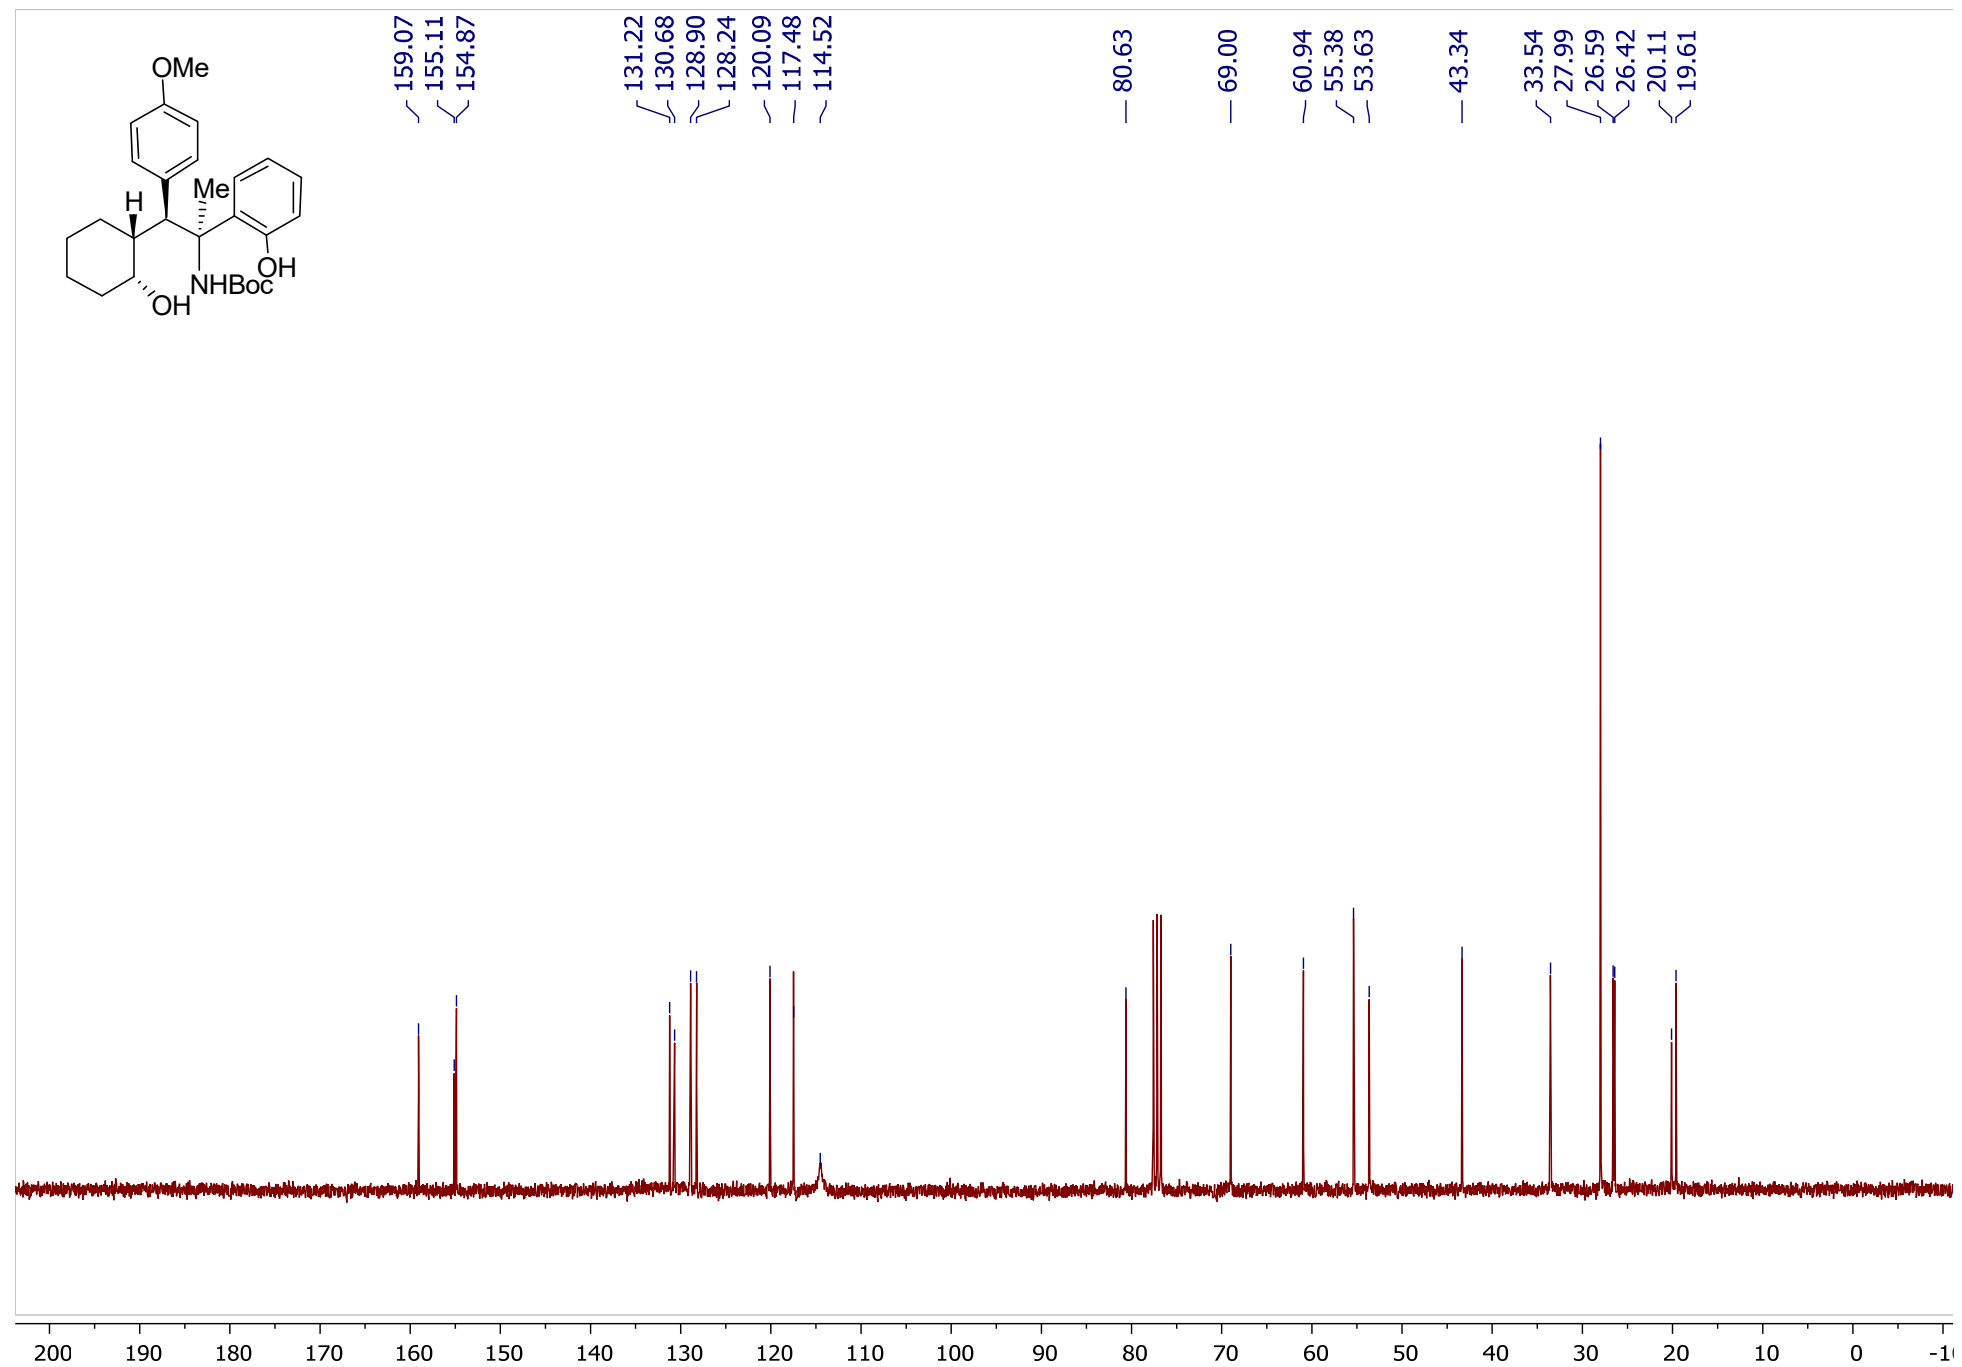

$^{13}\text{C}$  DEPT 135 (75 MHz,  $\text{CDCl}_3$ )

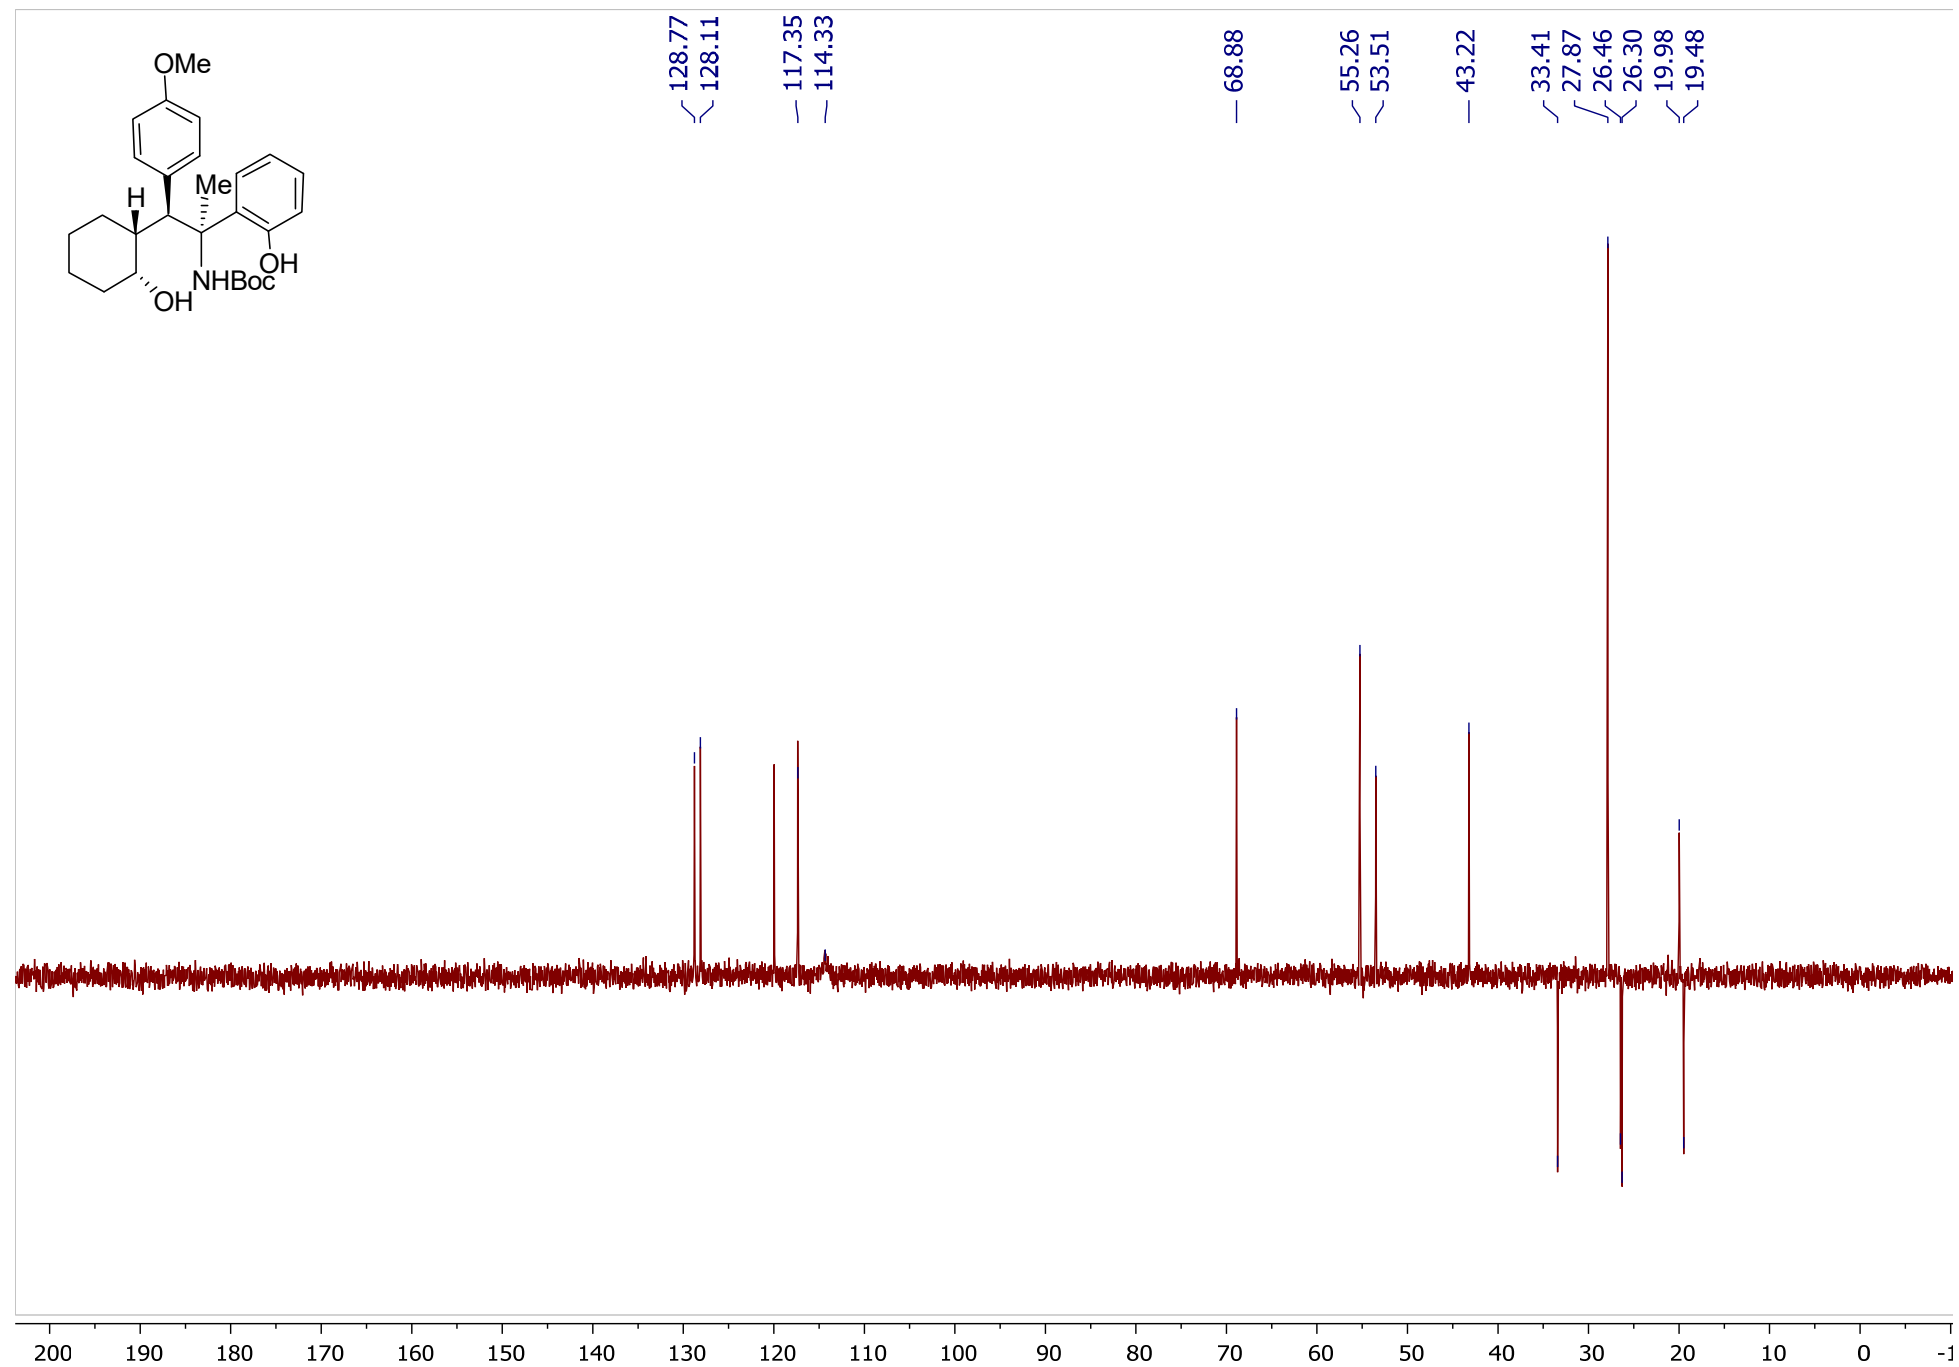

$^1\text{H}$ - $^1\text{H}$  COSY

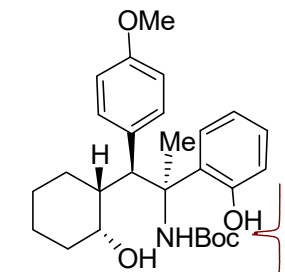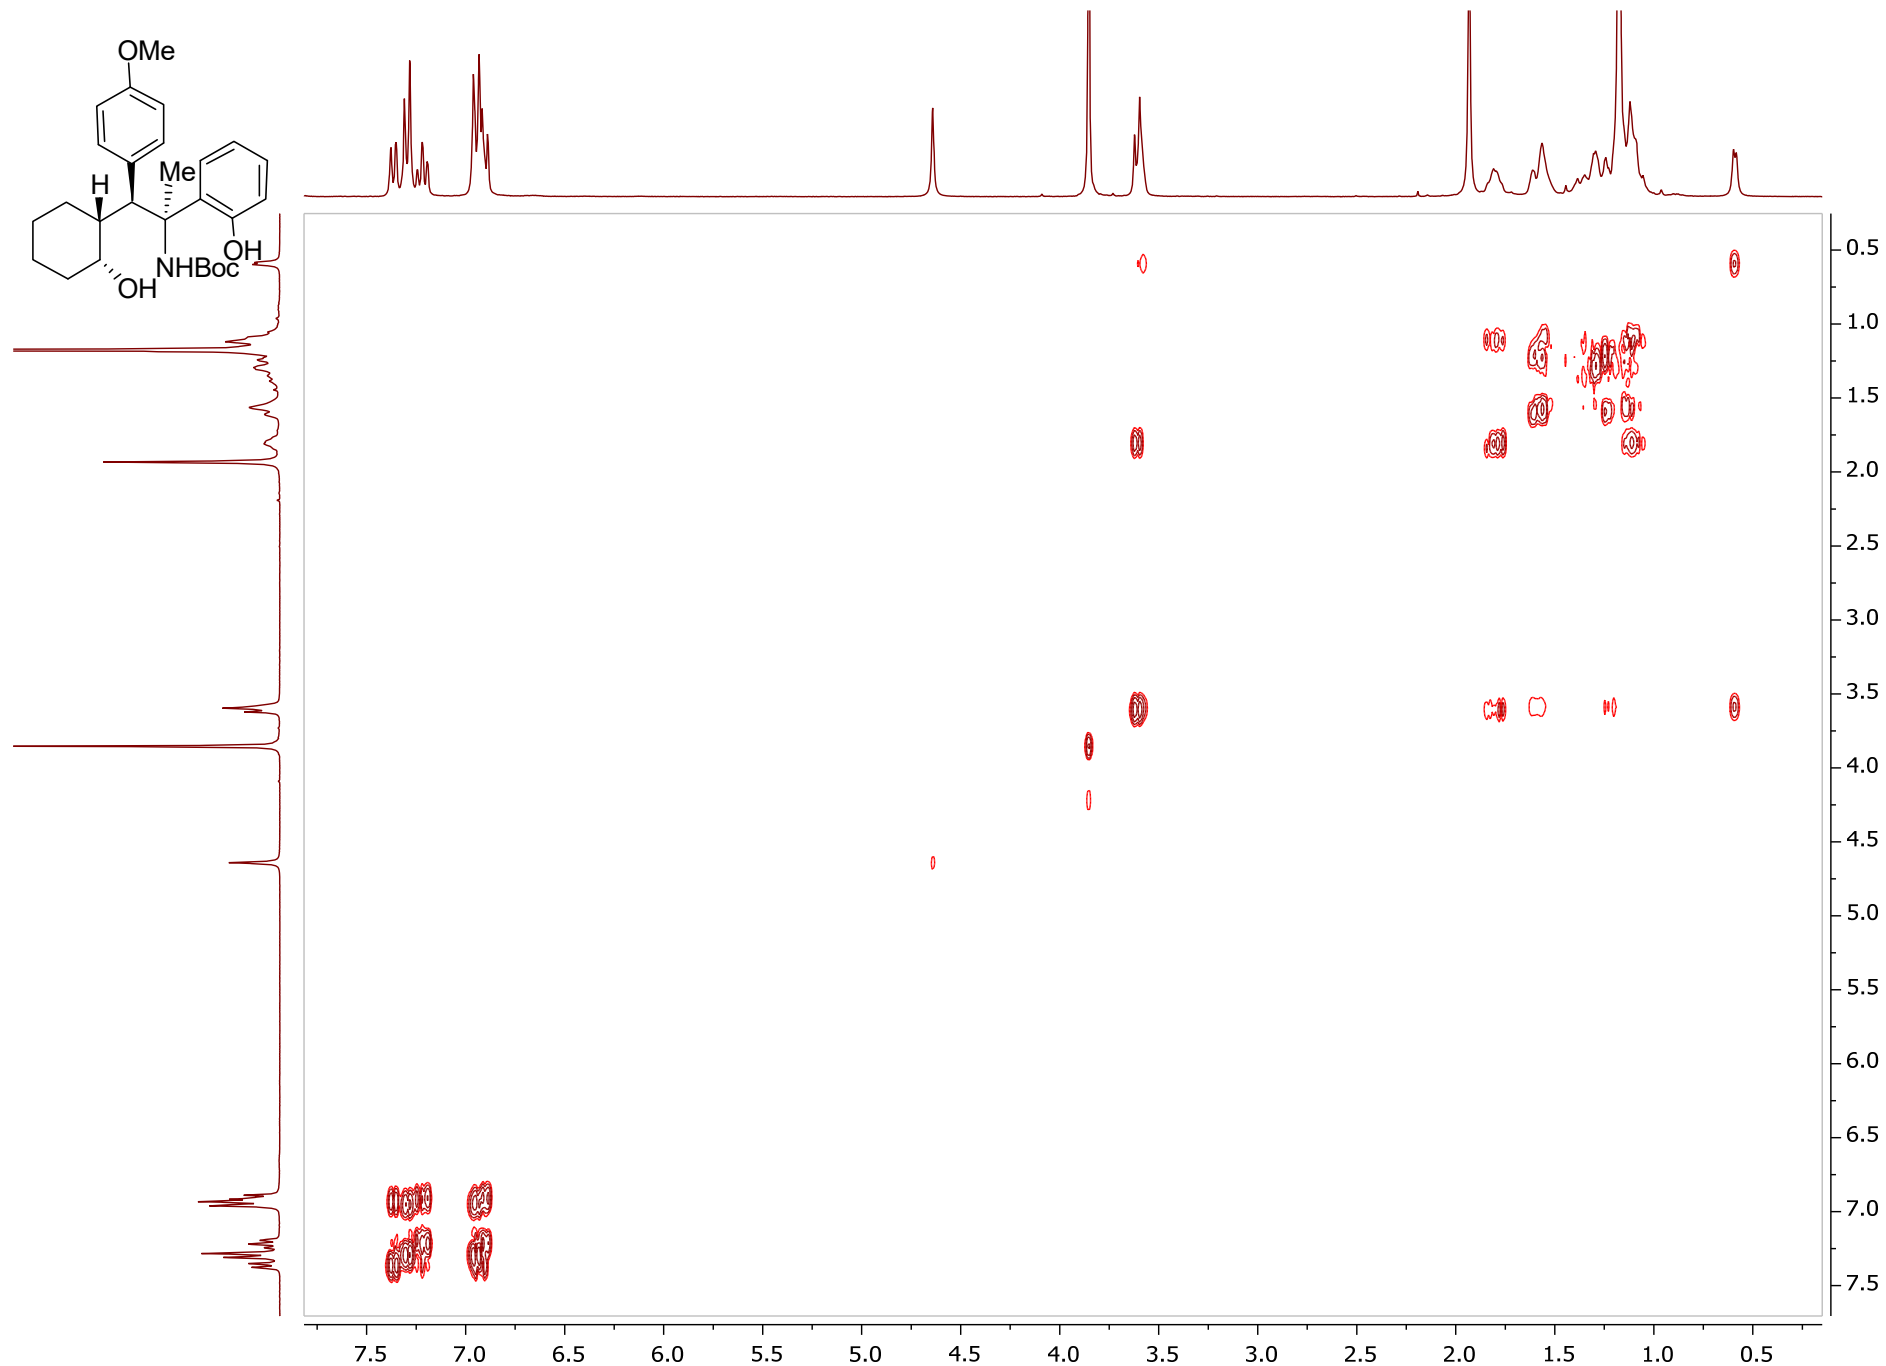

$^1\text{H}$ - $^{13}\text{C}$  HSQC

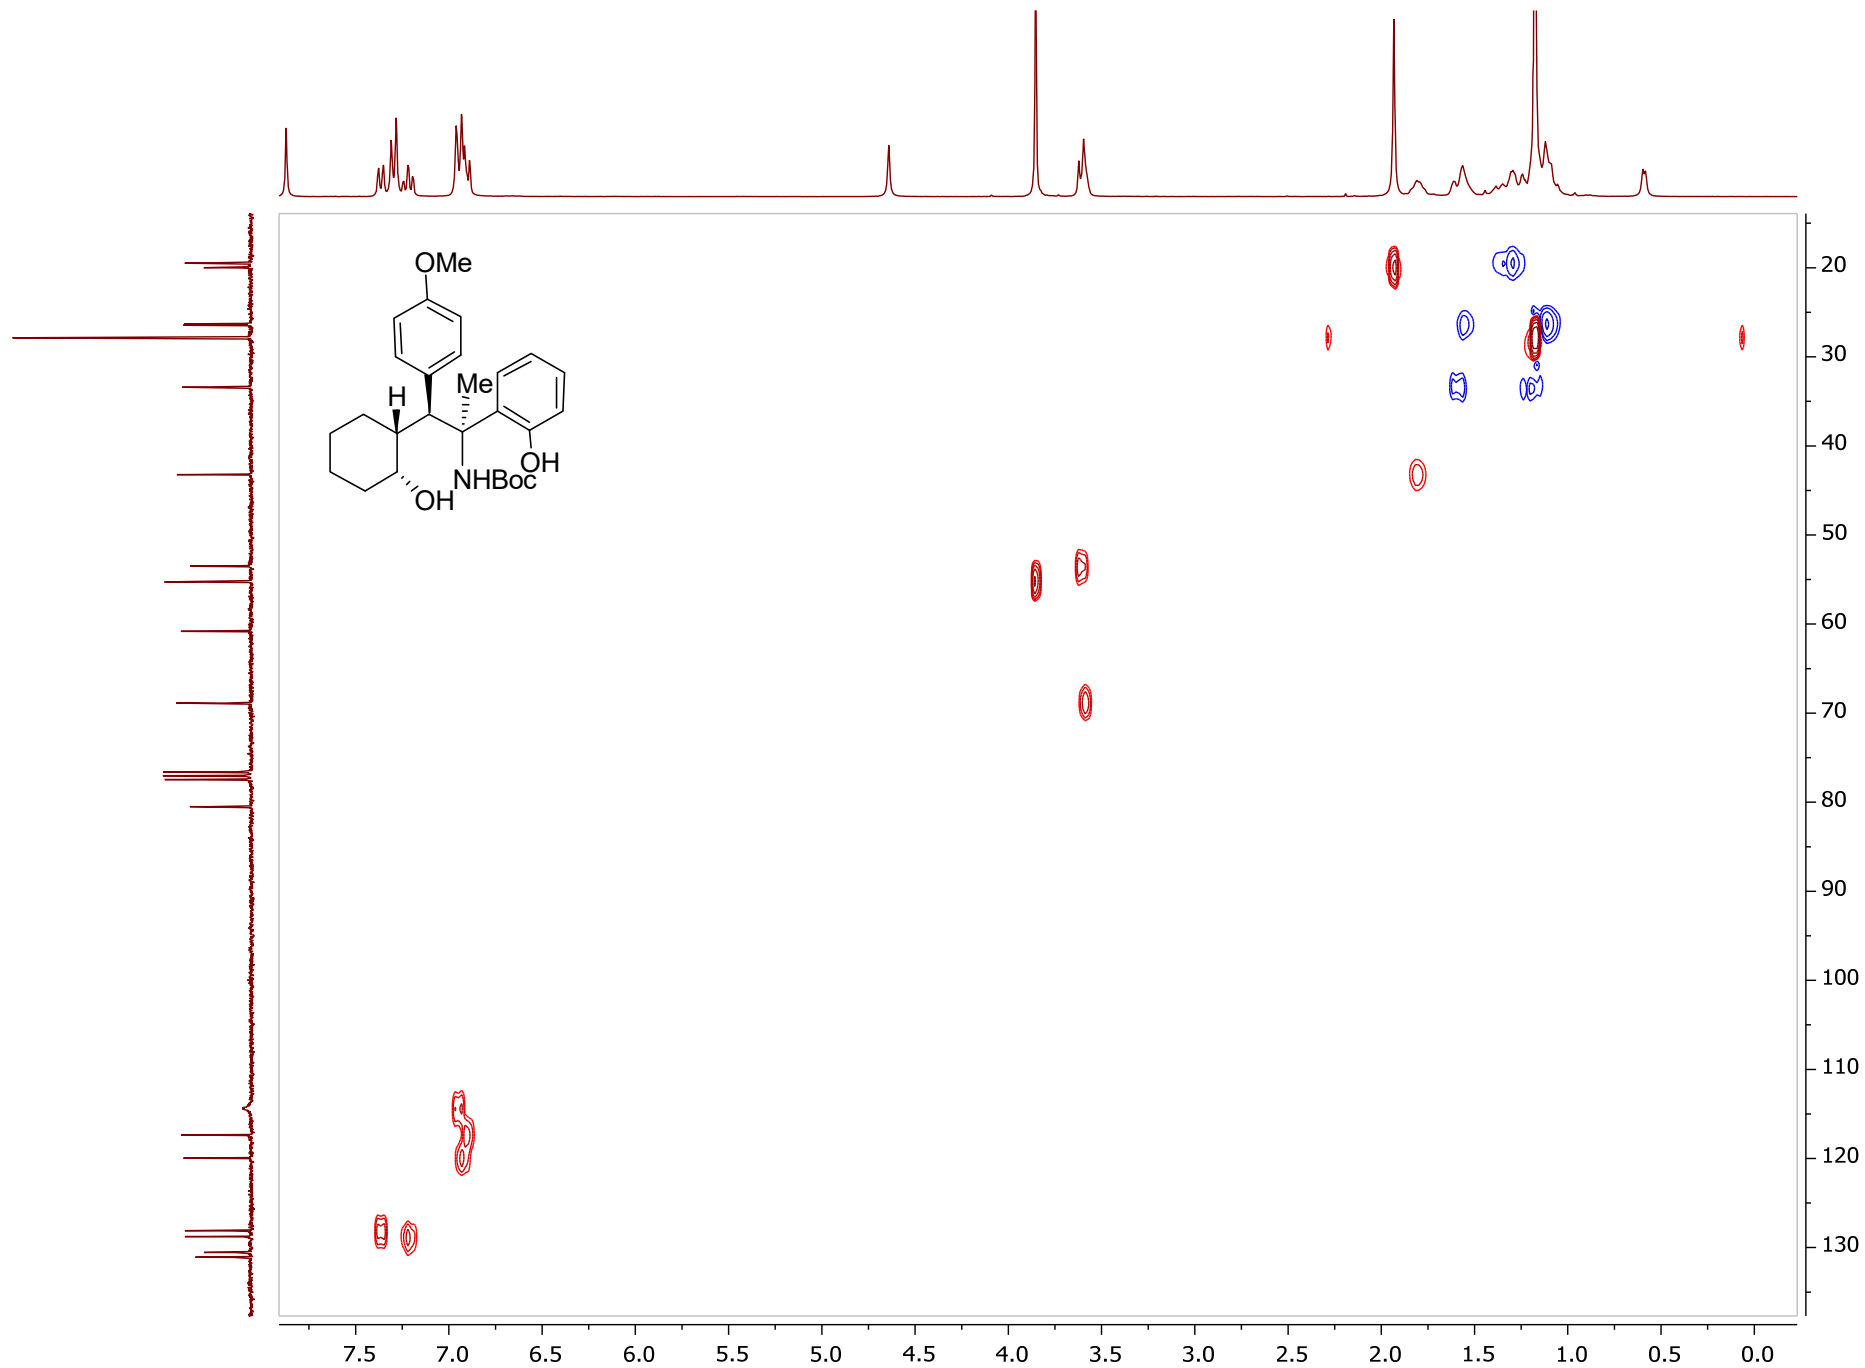

***tert*-Butyl ((2*S*\*,3*S*\*)-4-hydroxy-2-(2-hydroxyphenyl)-3-(4-methoxyphenyl)butan-2-yl)carbamate 8fa**

<sup>1</sup>H NMR (300 MHz, CDCl<sub>3</sub>)

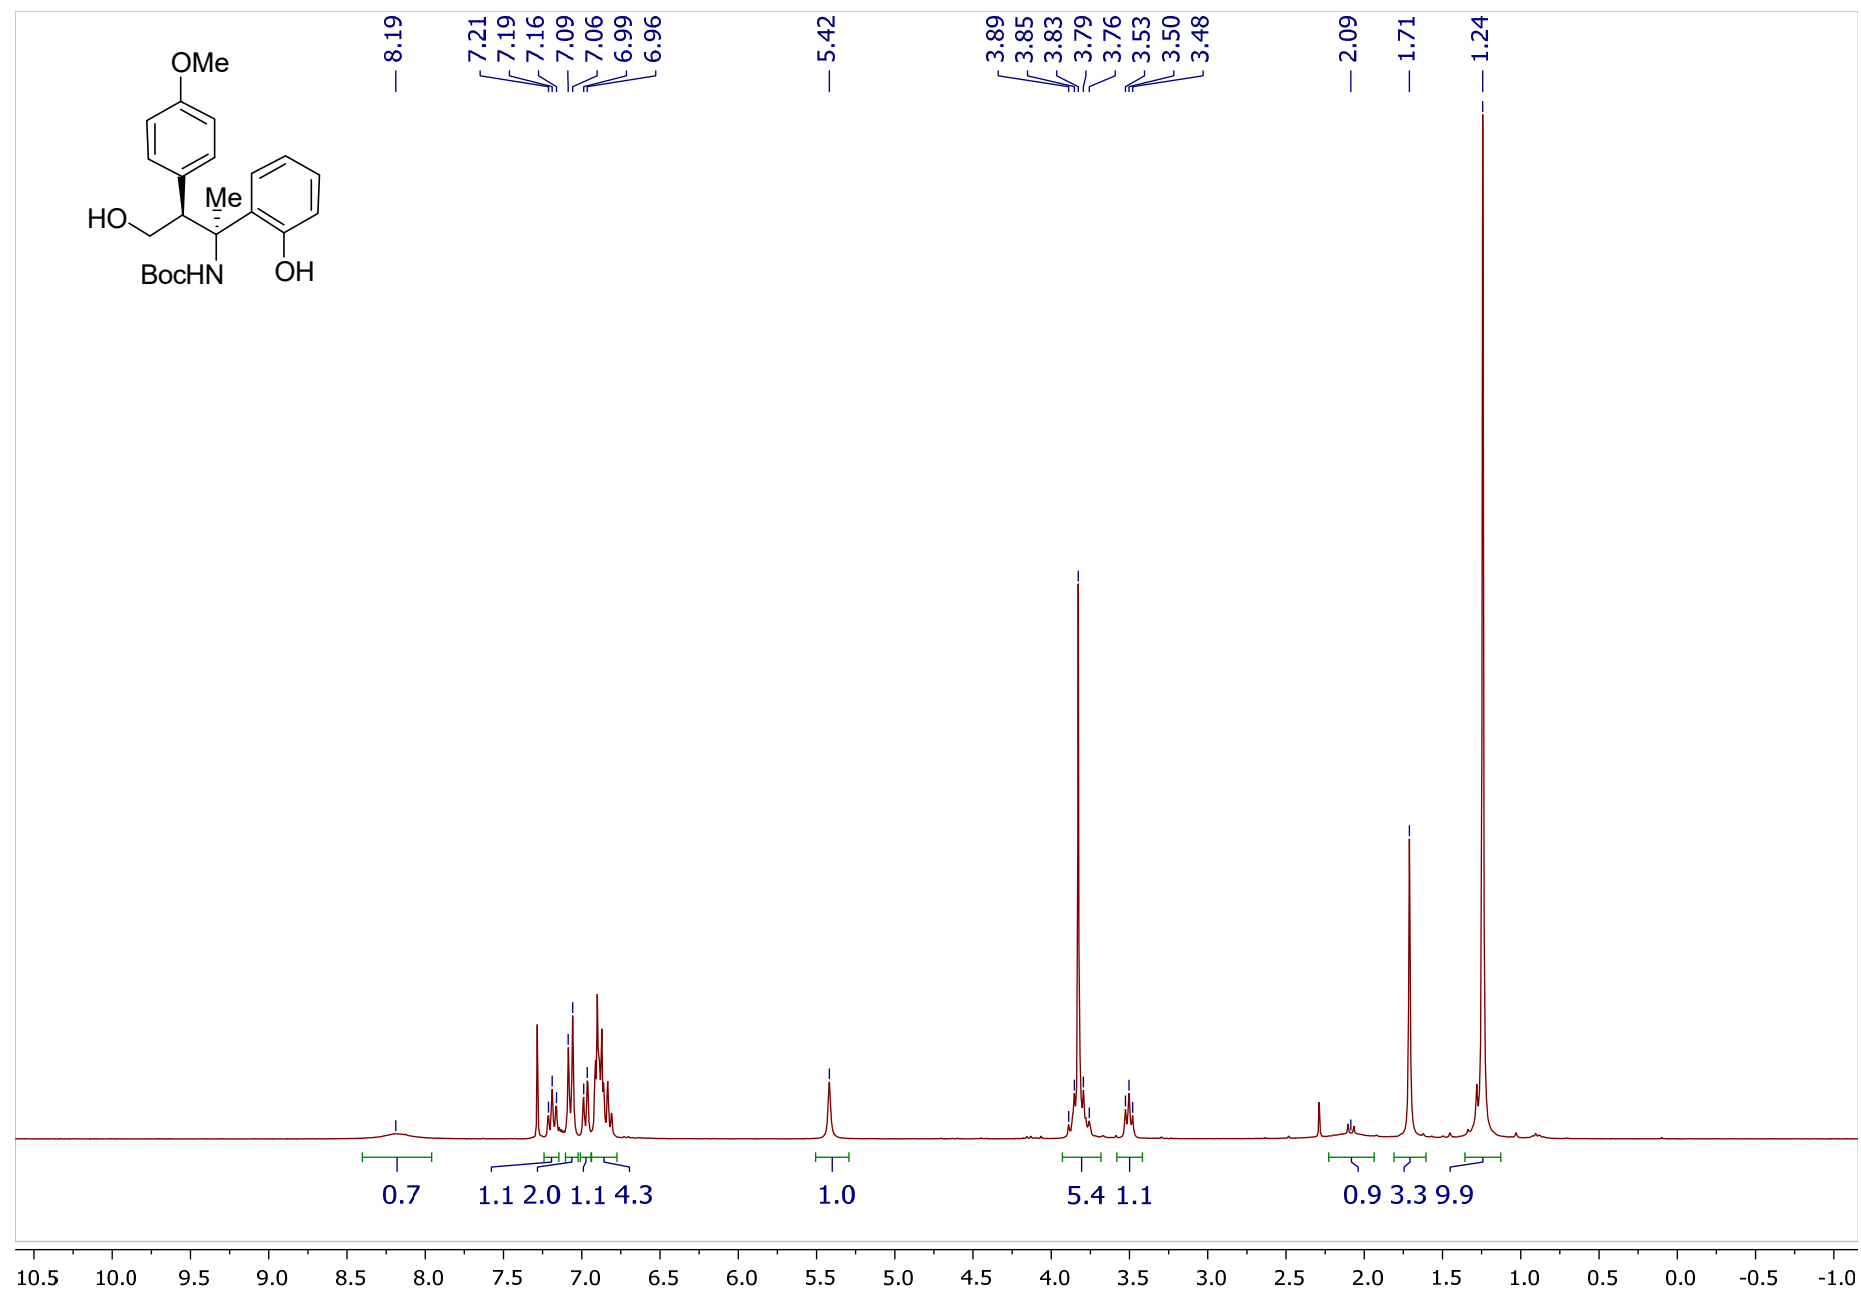

<sup>13</sup>C NMR (75 MHz, CDCl<sub>3</sub>)

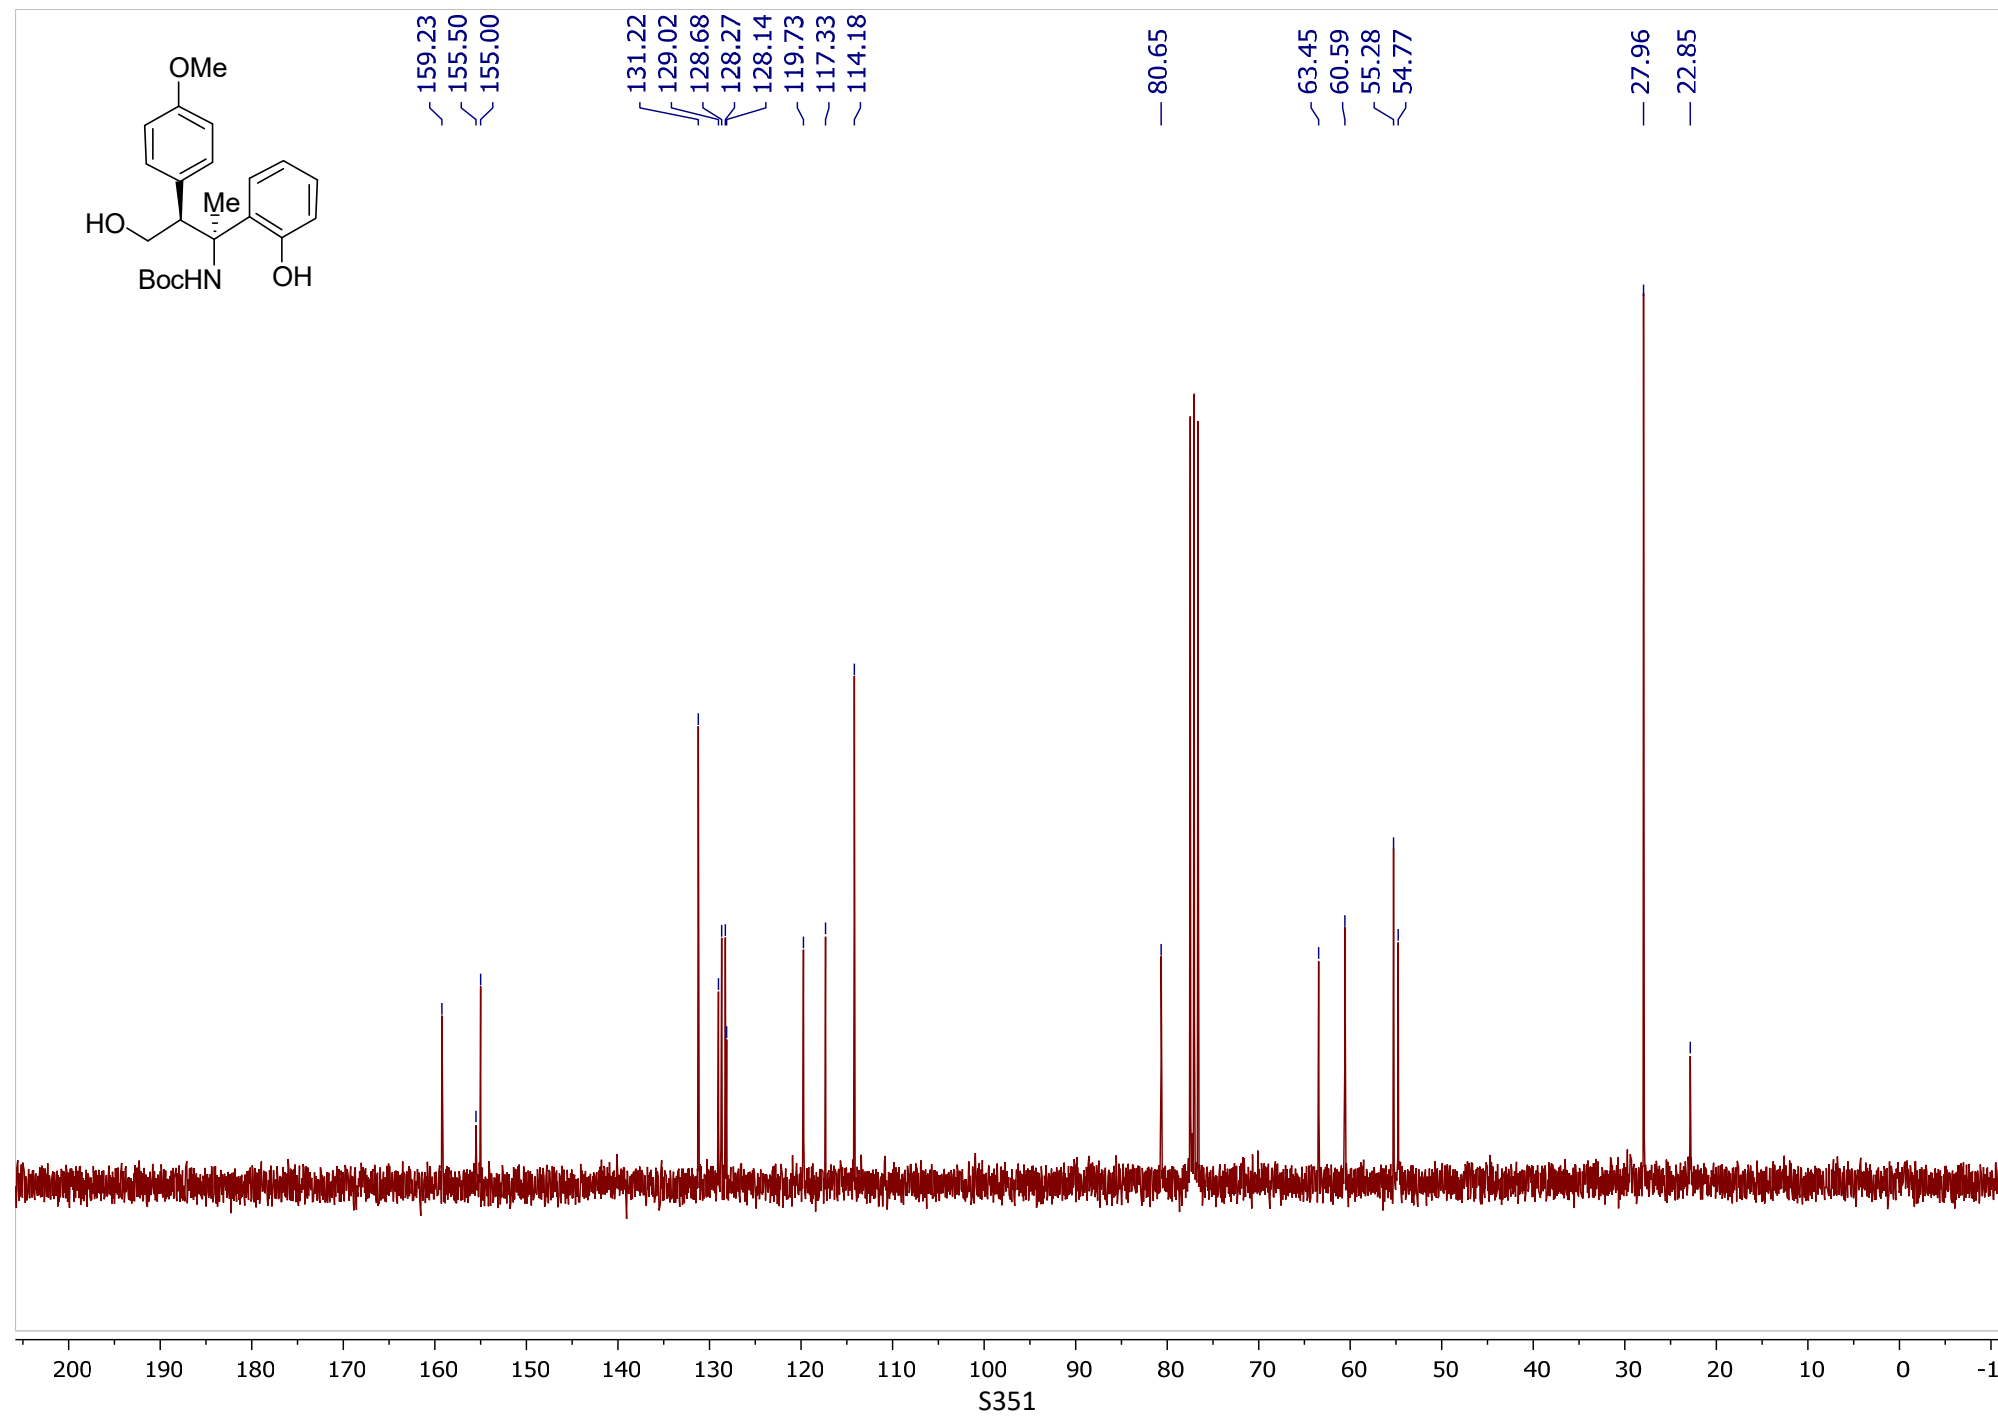

$^{13}\text{C}$  DEPT 135 (75 MHz,  $\text{CDCl}_3$ )

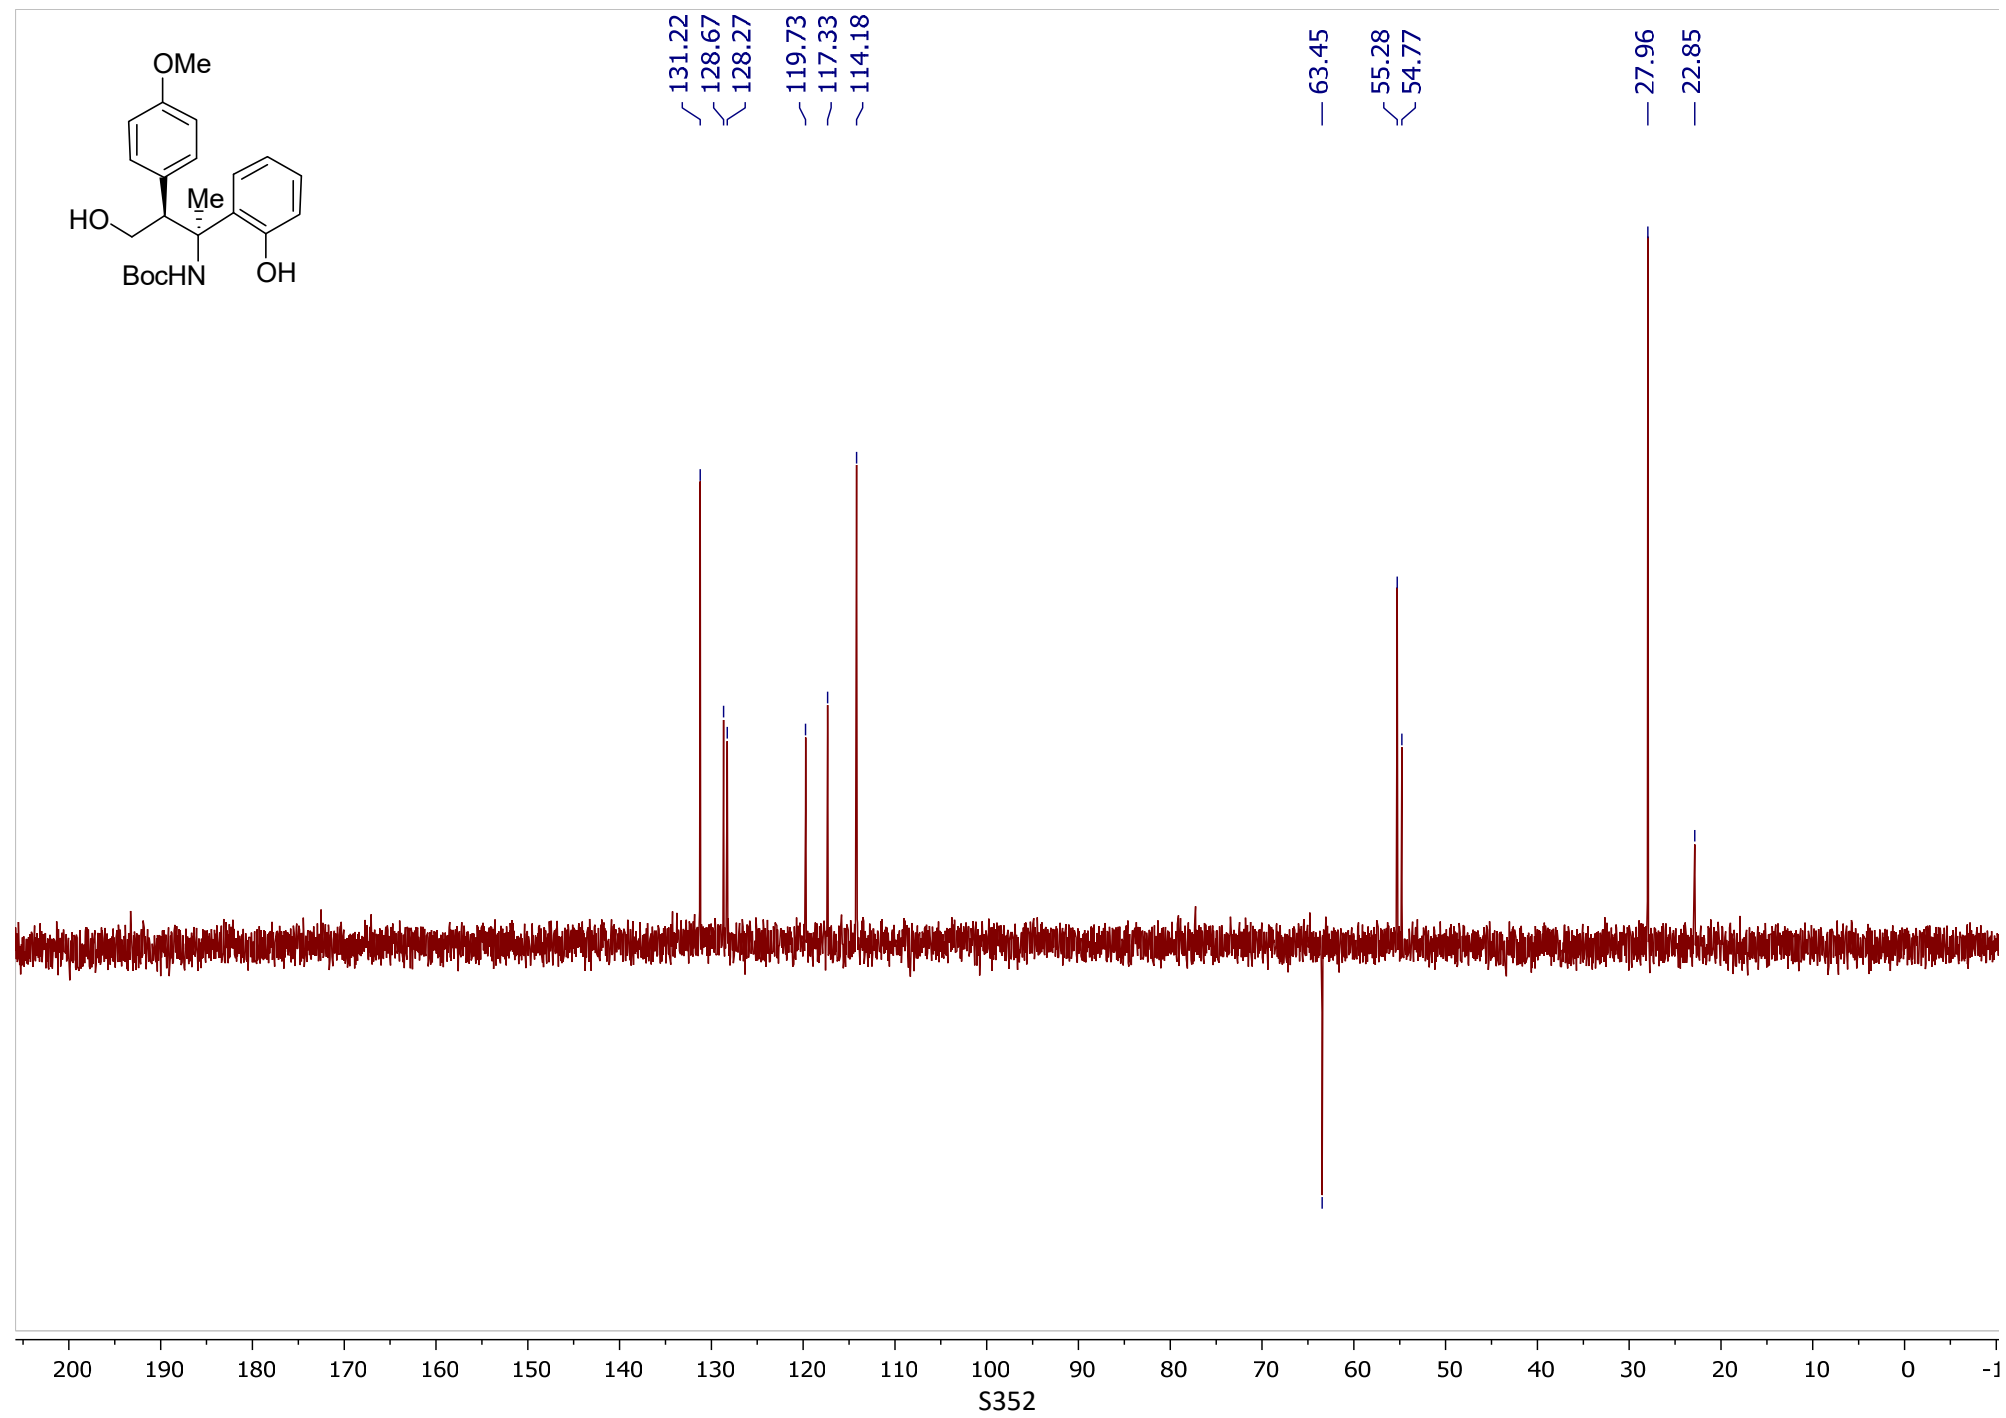



$^1\text{H}$ - $^1\text{H}$  COSY

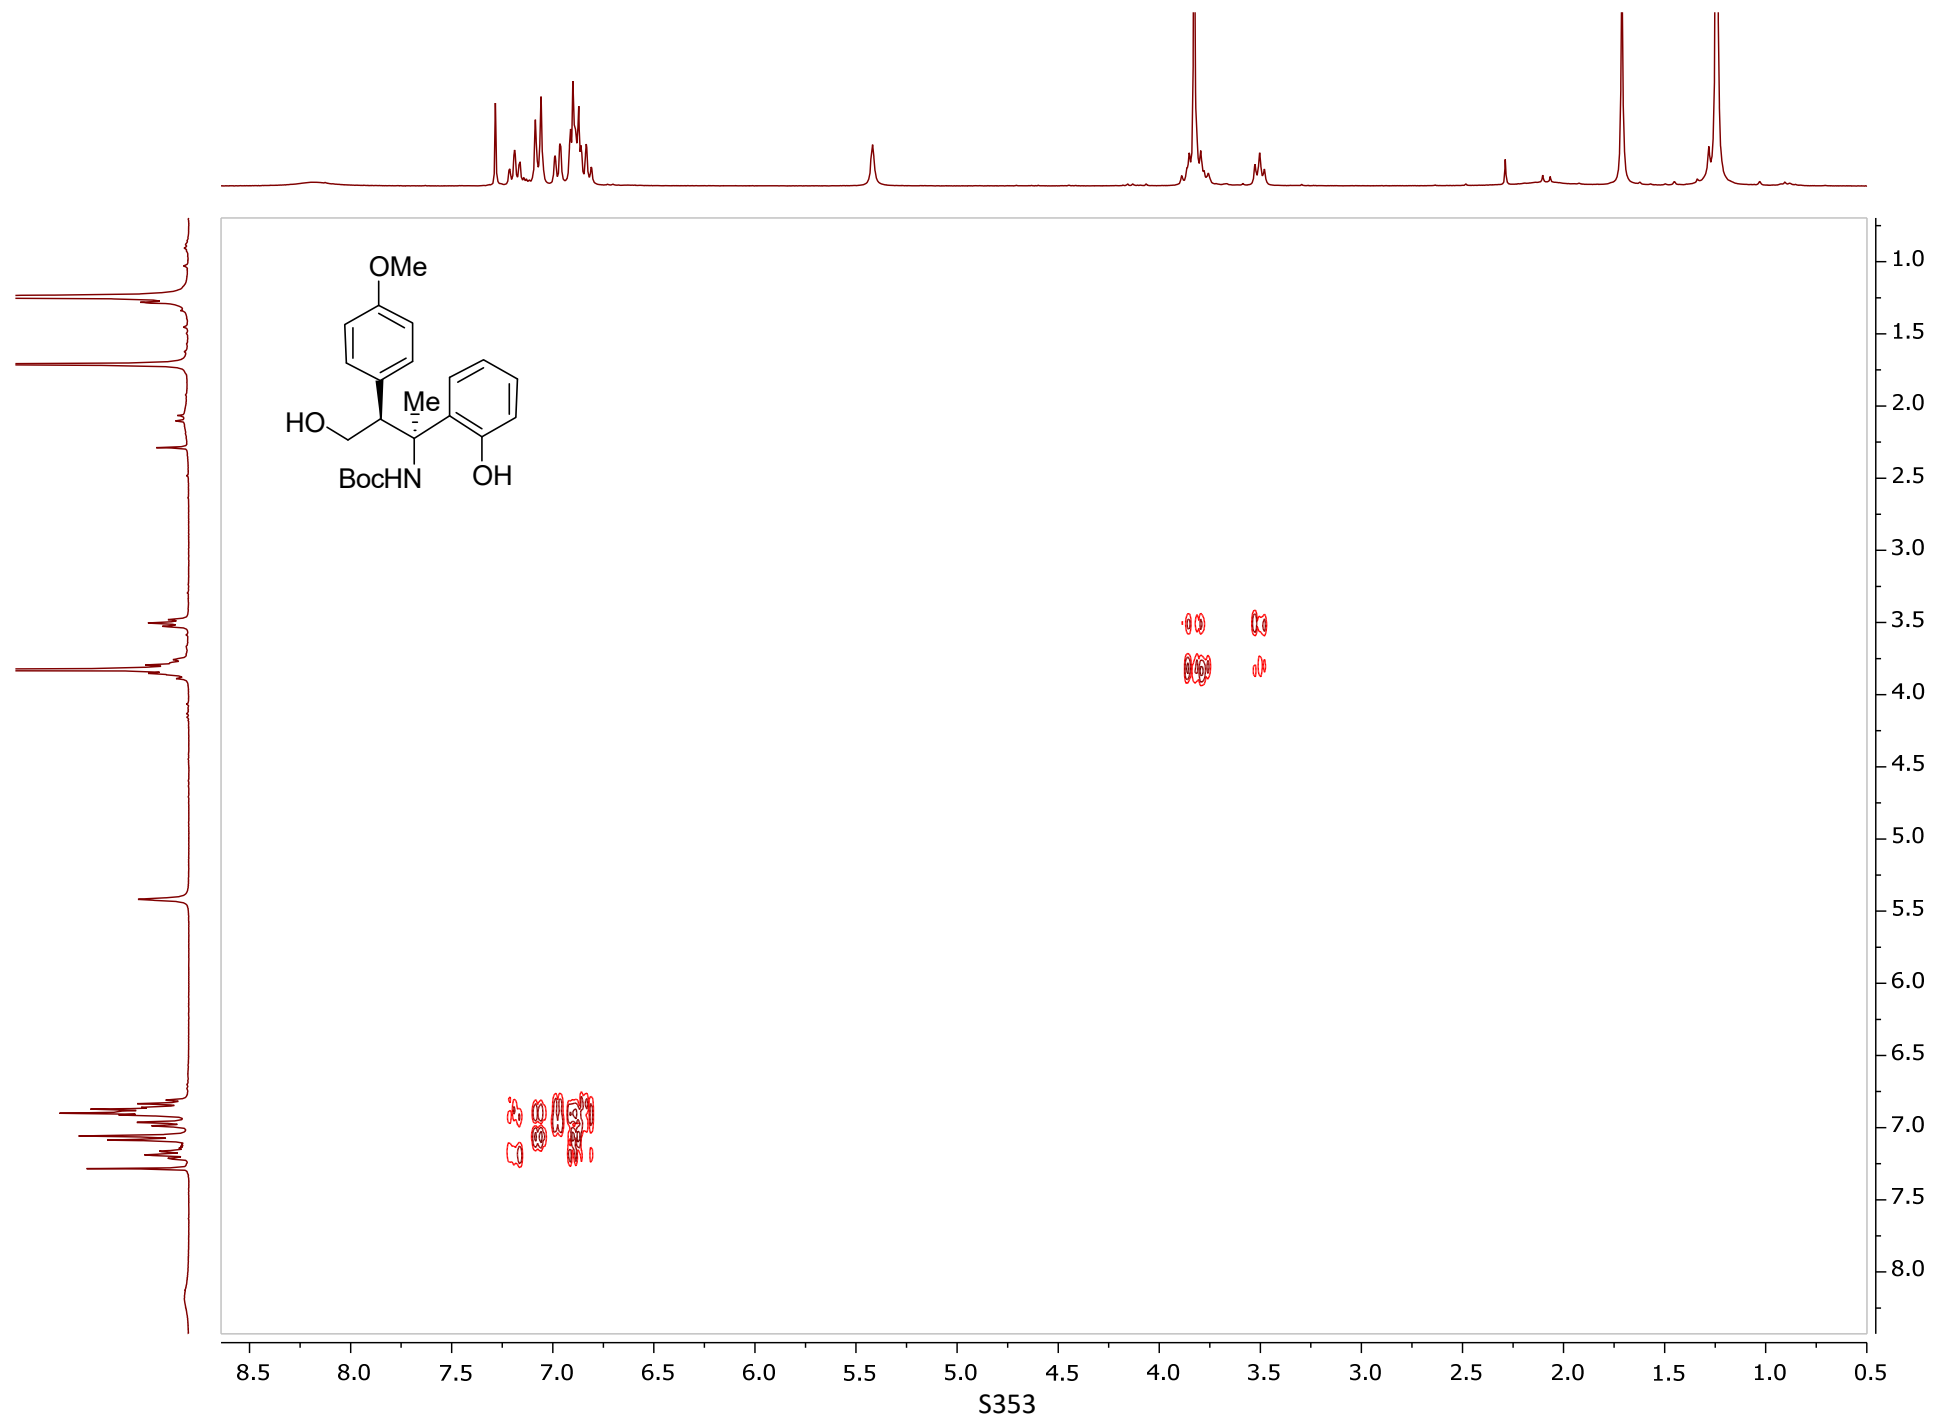

$^1\text{H}-^{13}\text{C}$  HSQC

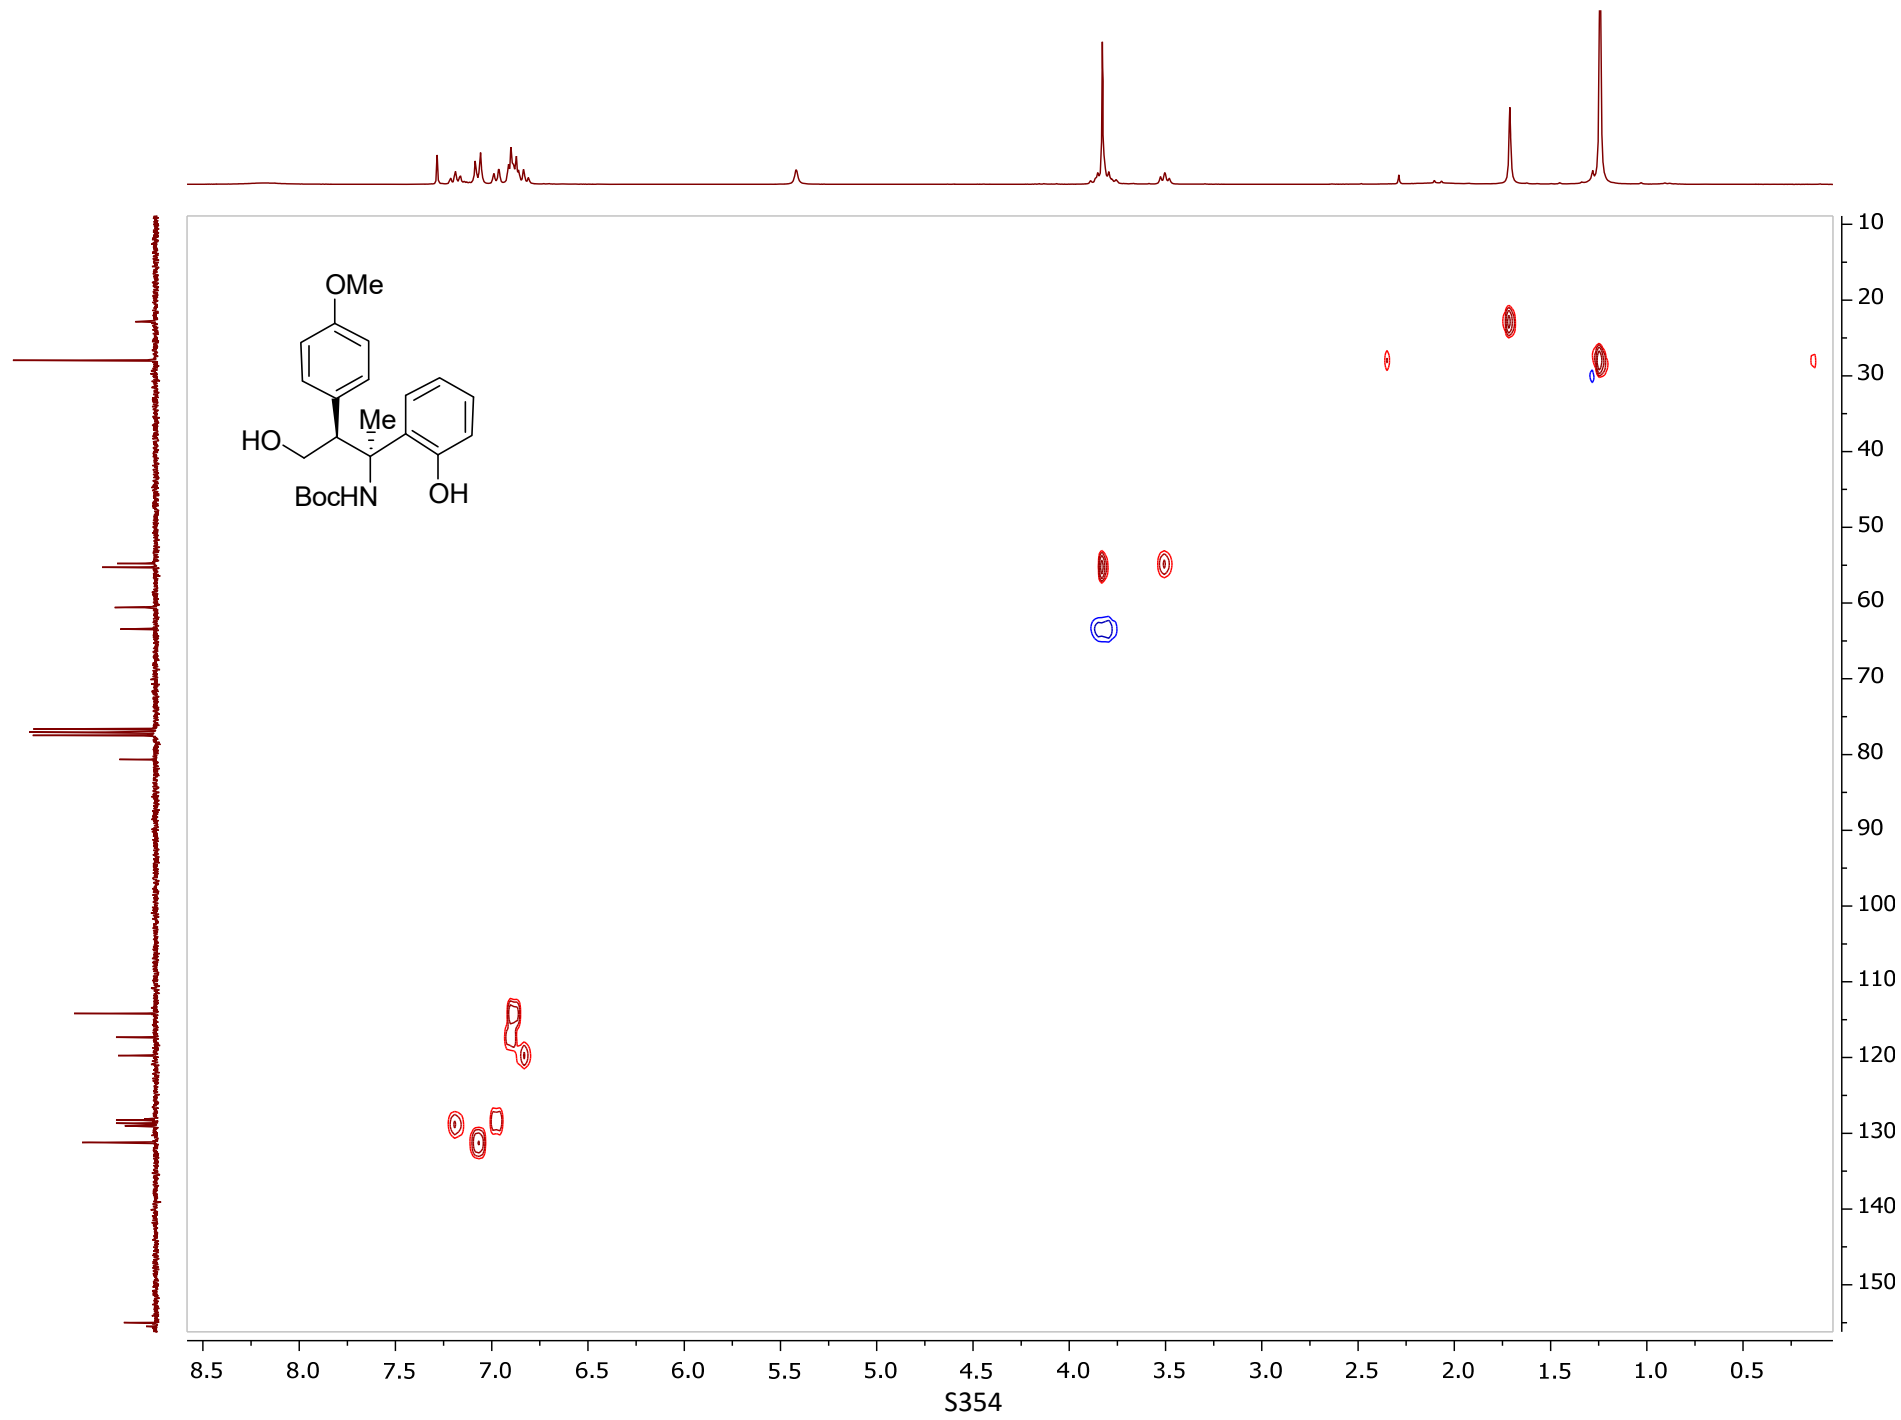

**(2*S*\*,3*S*\*,4*S*\*)-Ethyl 4-(*tert*-butoxycarbonylamino)-2-hydroxy-4-(2-hydroxyphenyl)-3-(4-methoxyphenyl)pentanoate 8ga**

<sup>1</sup>H NMR (300 MHz, CDCl<sub>3</sub>)

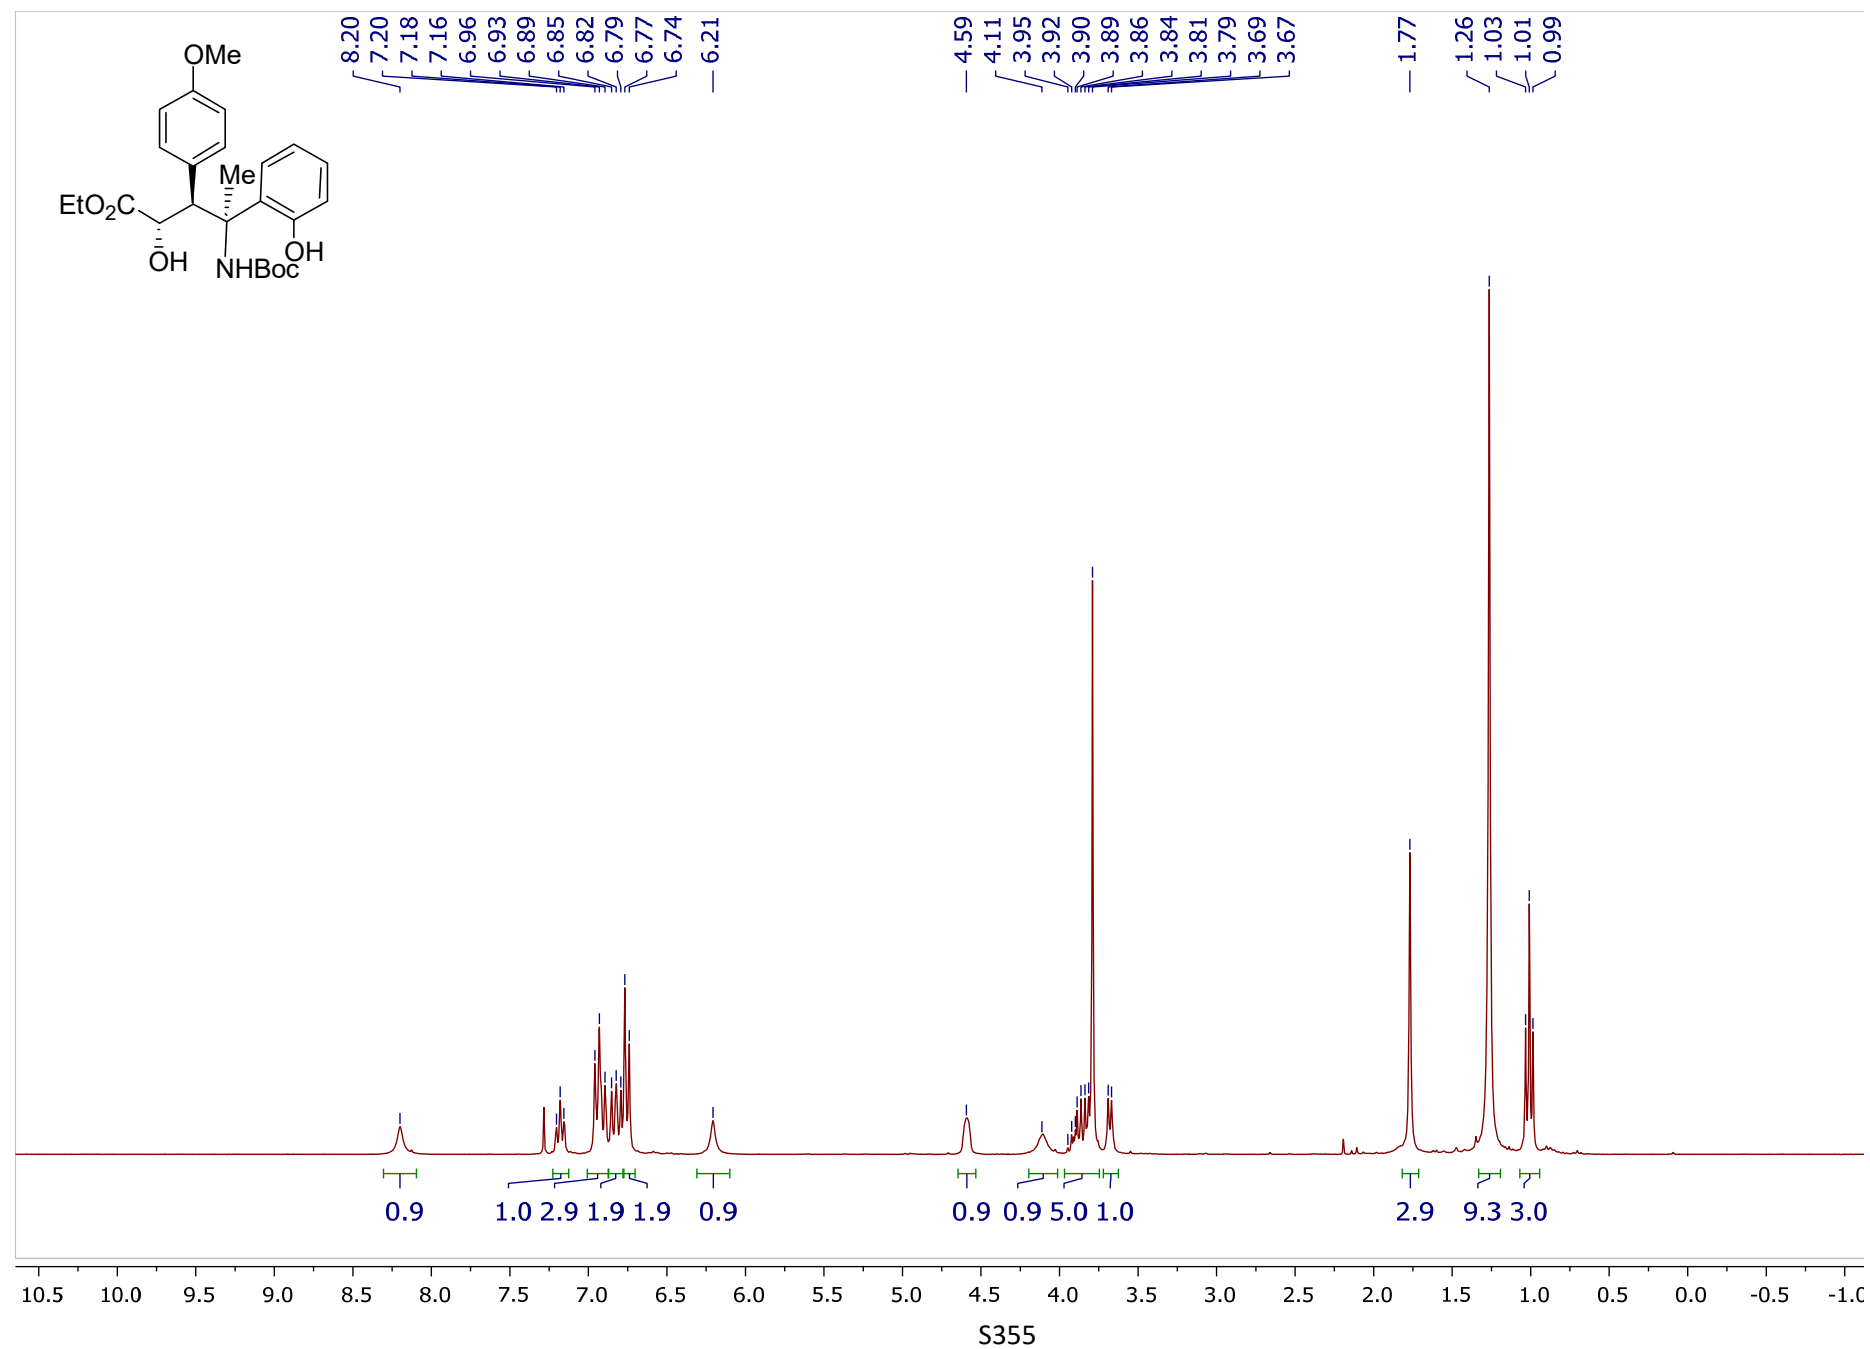

<sup>13</sup>C NMR (75 MHz, CDCl<sub>3</sub>)

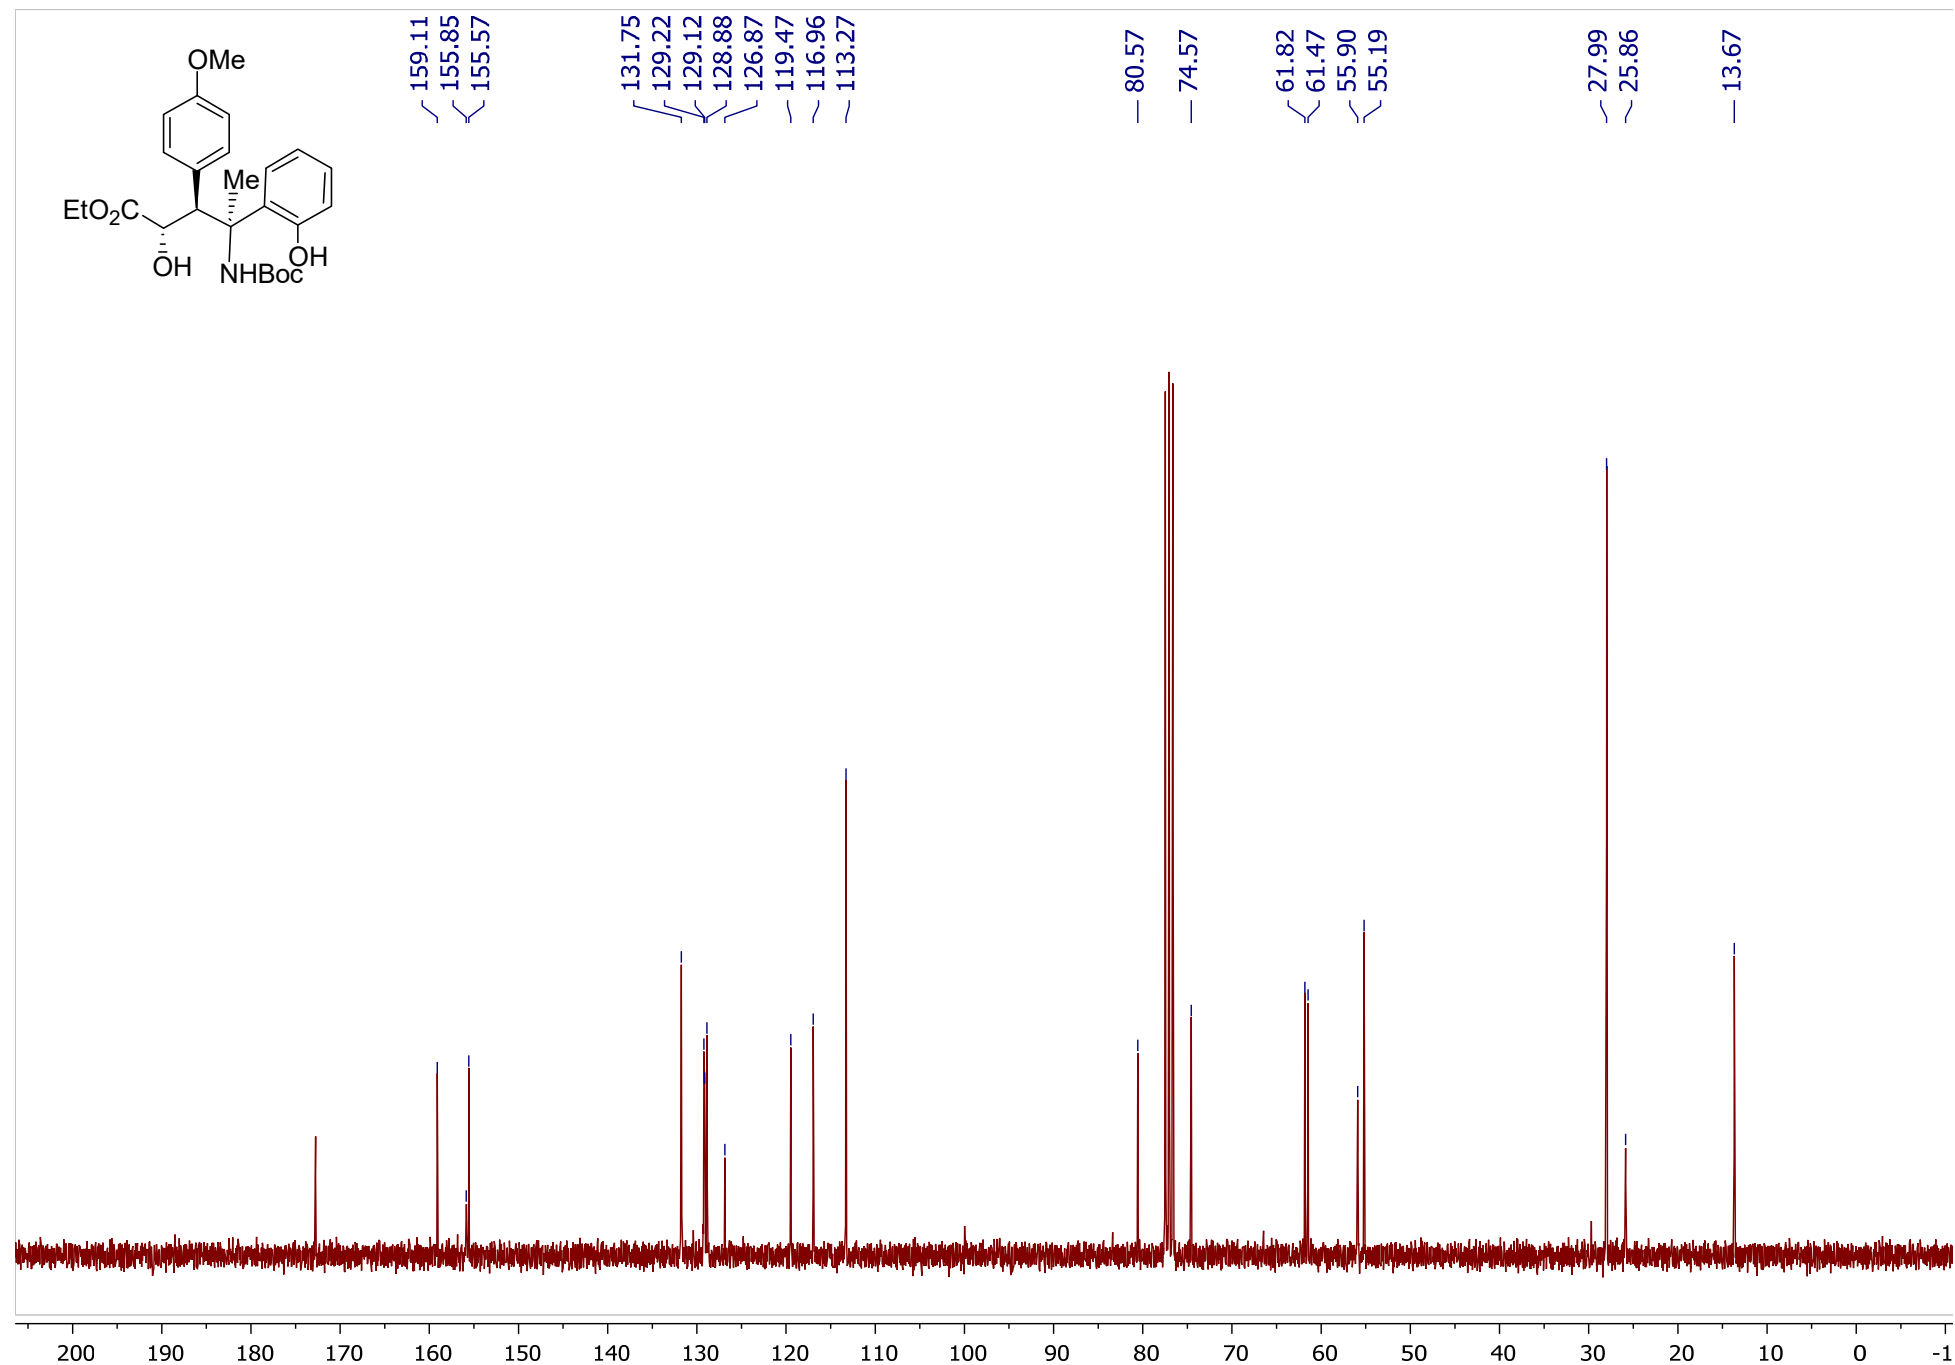

$^{13}\text{C}$  DEPT 135 (75 MHz,  $\text{CDCl}_3$ )

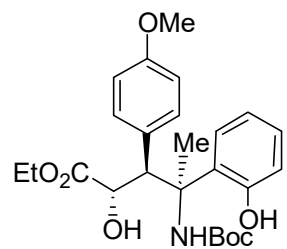

131.75  
129.22  
128.88

119.47  
116.95  
113.27

74.57

61.47  
55.90  
55.19

27.99  
25.86

13.67

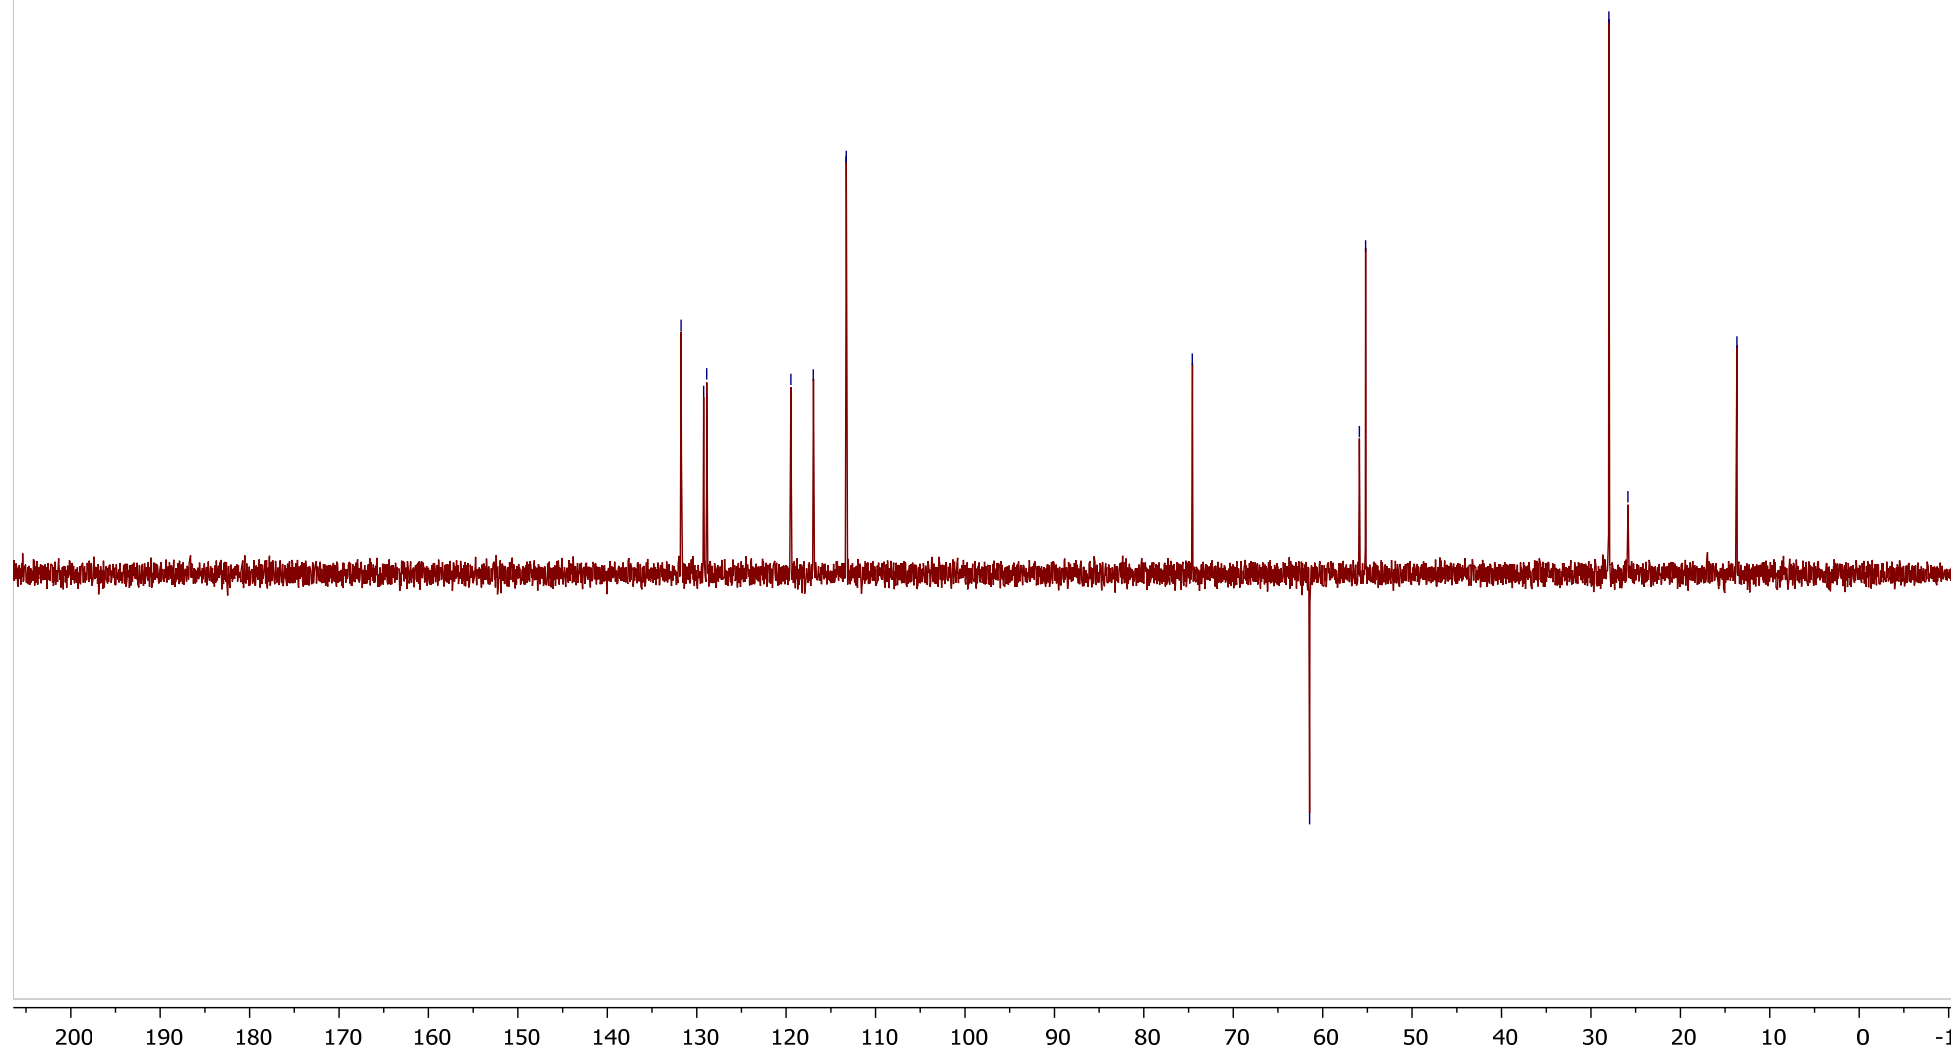

$^1\text{H}$ - $^1\text{H}$  COSY

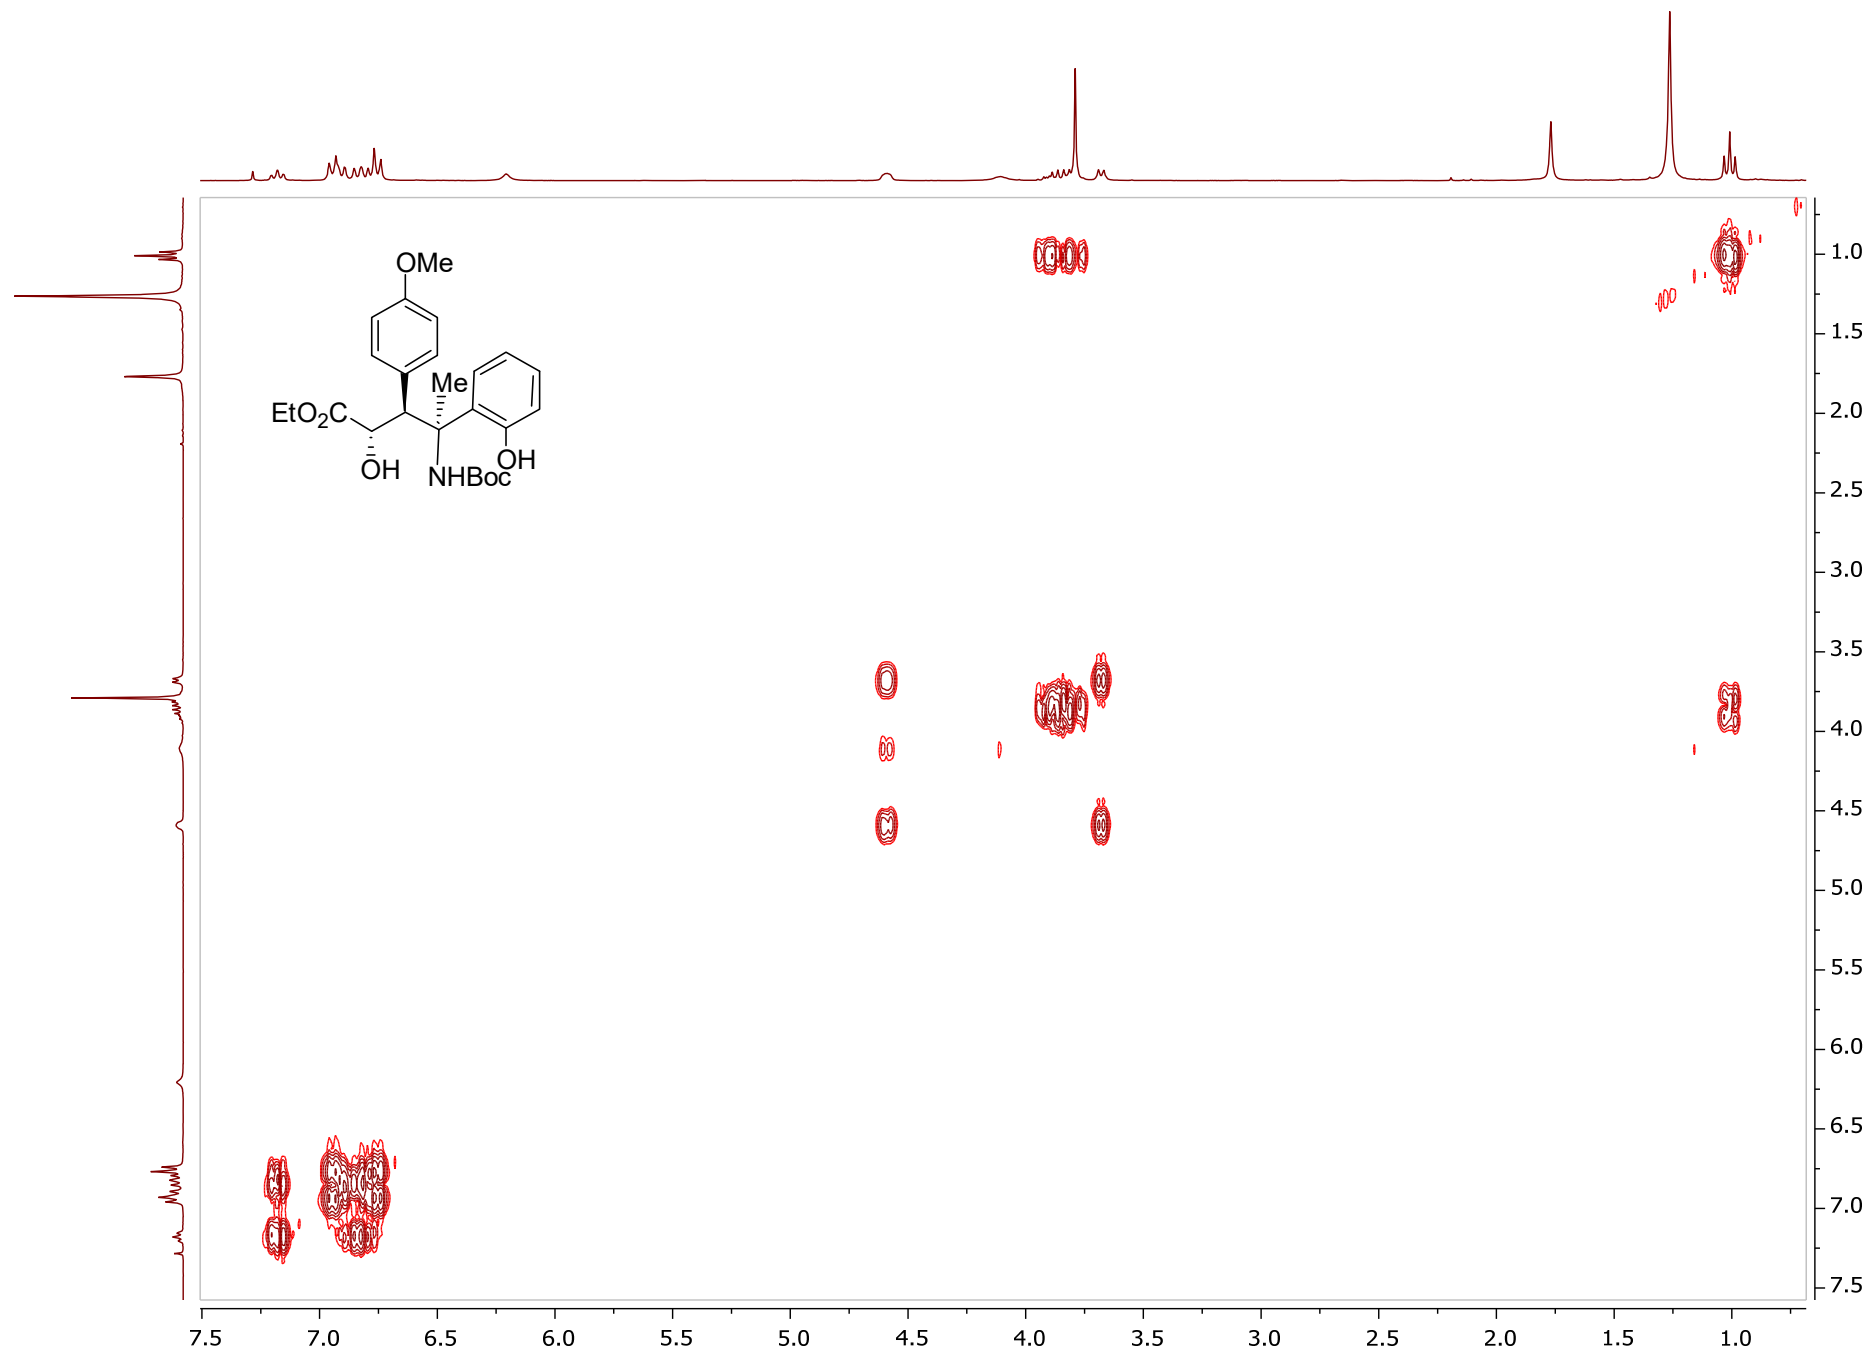

$^1\text{H}$ - $^{13}\text{C}$  HSQC

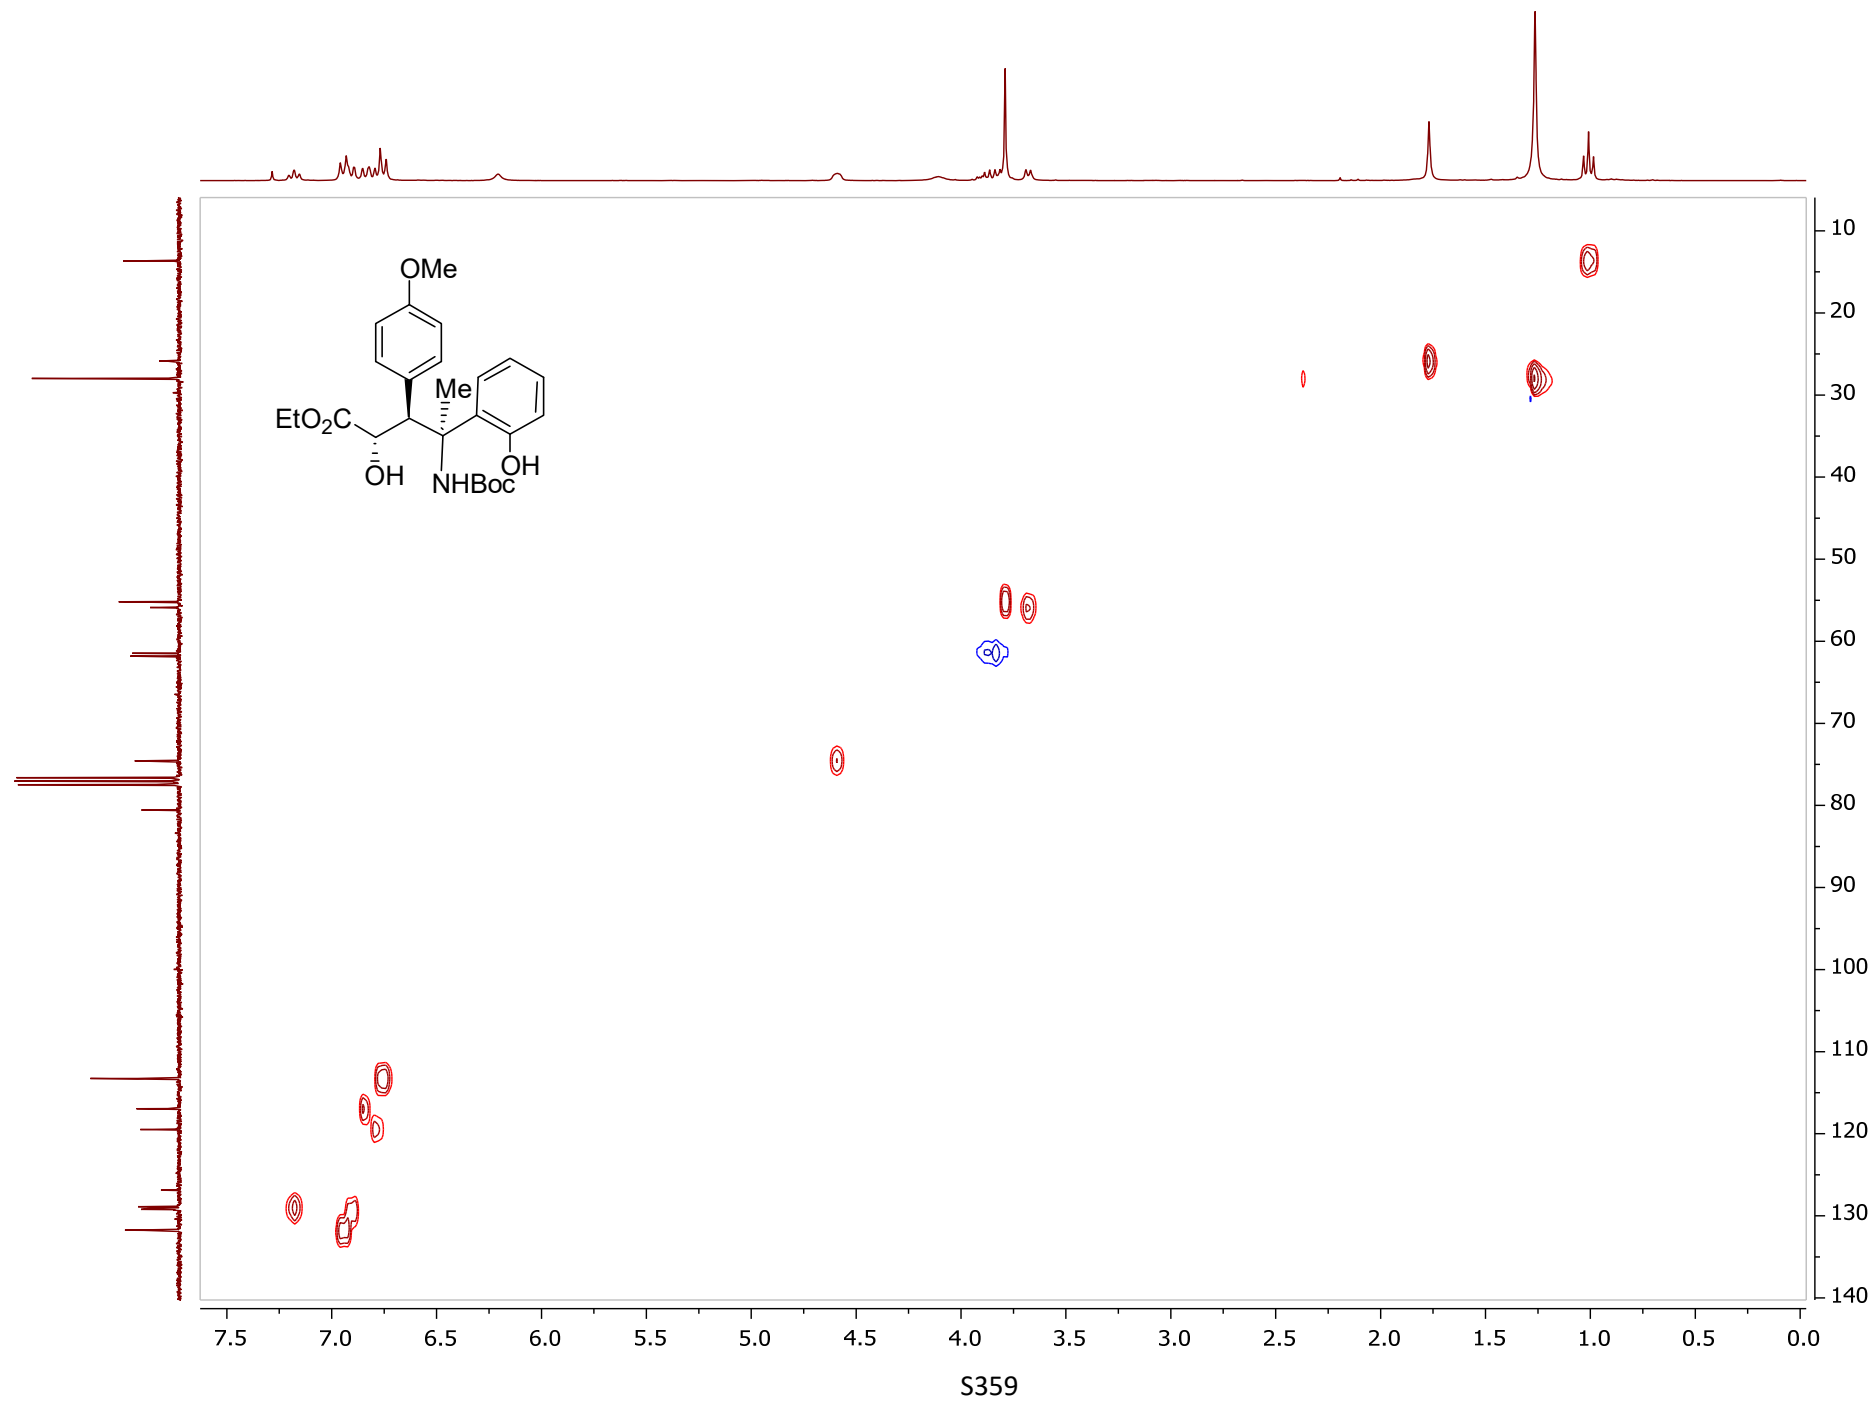

**3-Methoxy-2-((3S\*,4S\*)-4-(4-methoxyphenyl)-3,6,6-trimethyl-1,2-oxazinan-3-yl)phenol 12ab**

<sup>1</sup>H NMR (300 MHz, CDCl<sub>3</sub>)

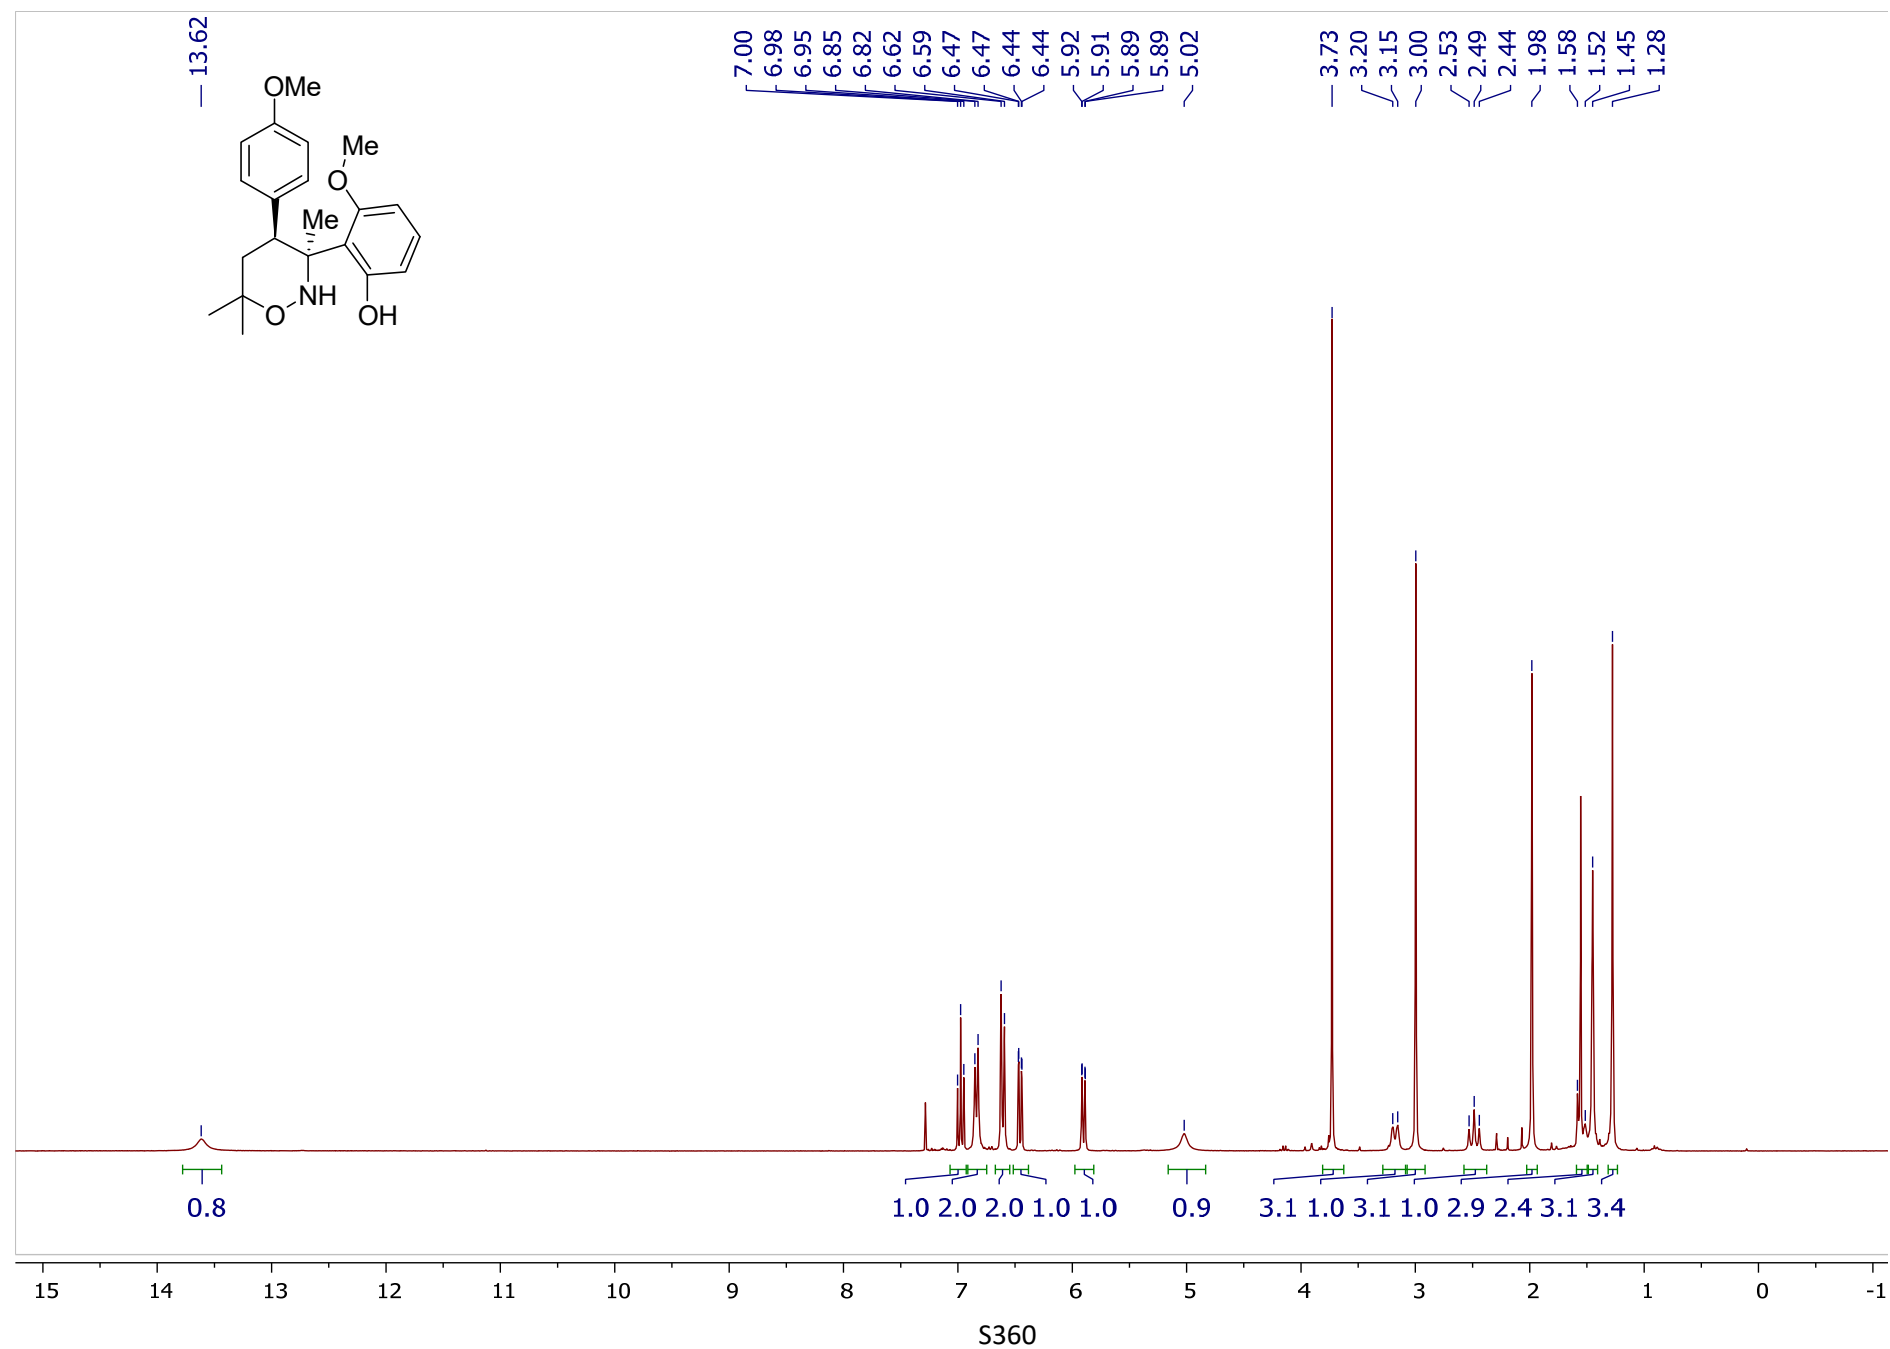



$^{13}\text{C}$  NMR (75 MHz,  $\text{CDCl}_3$ )

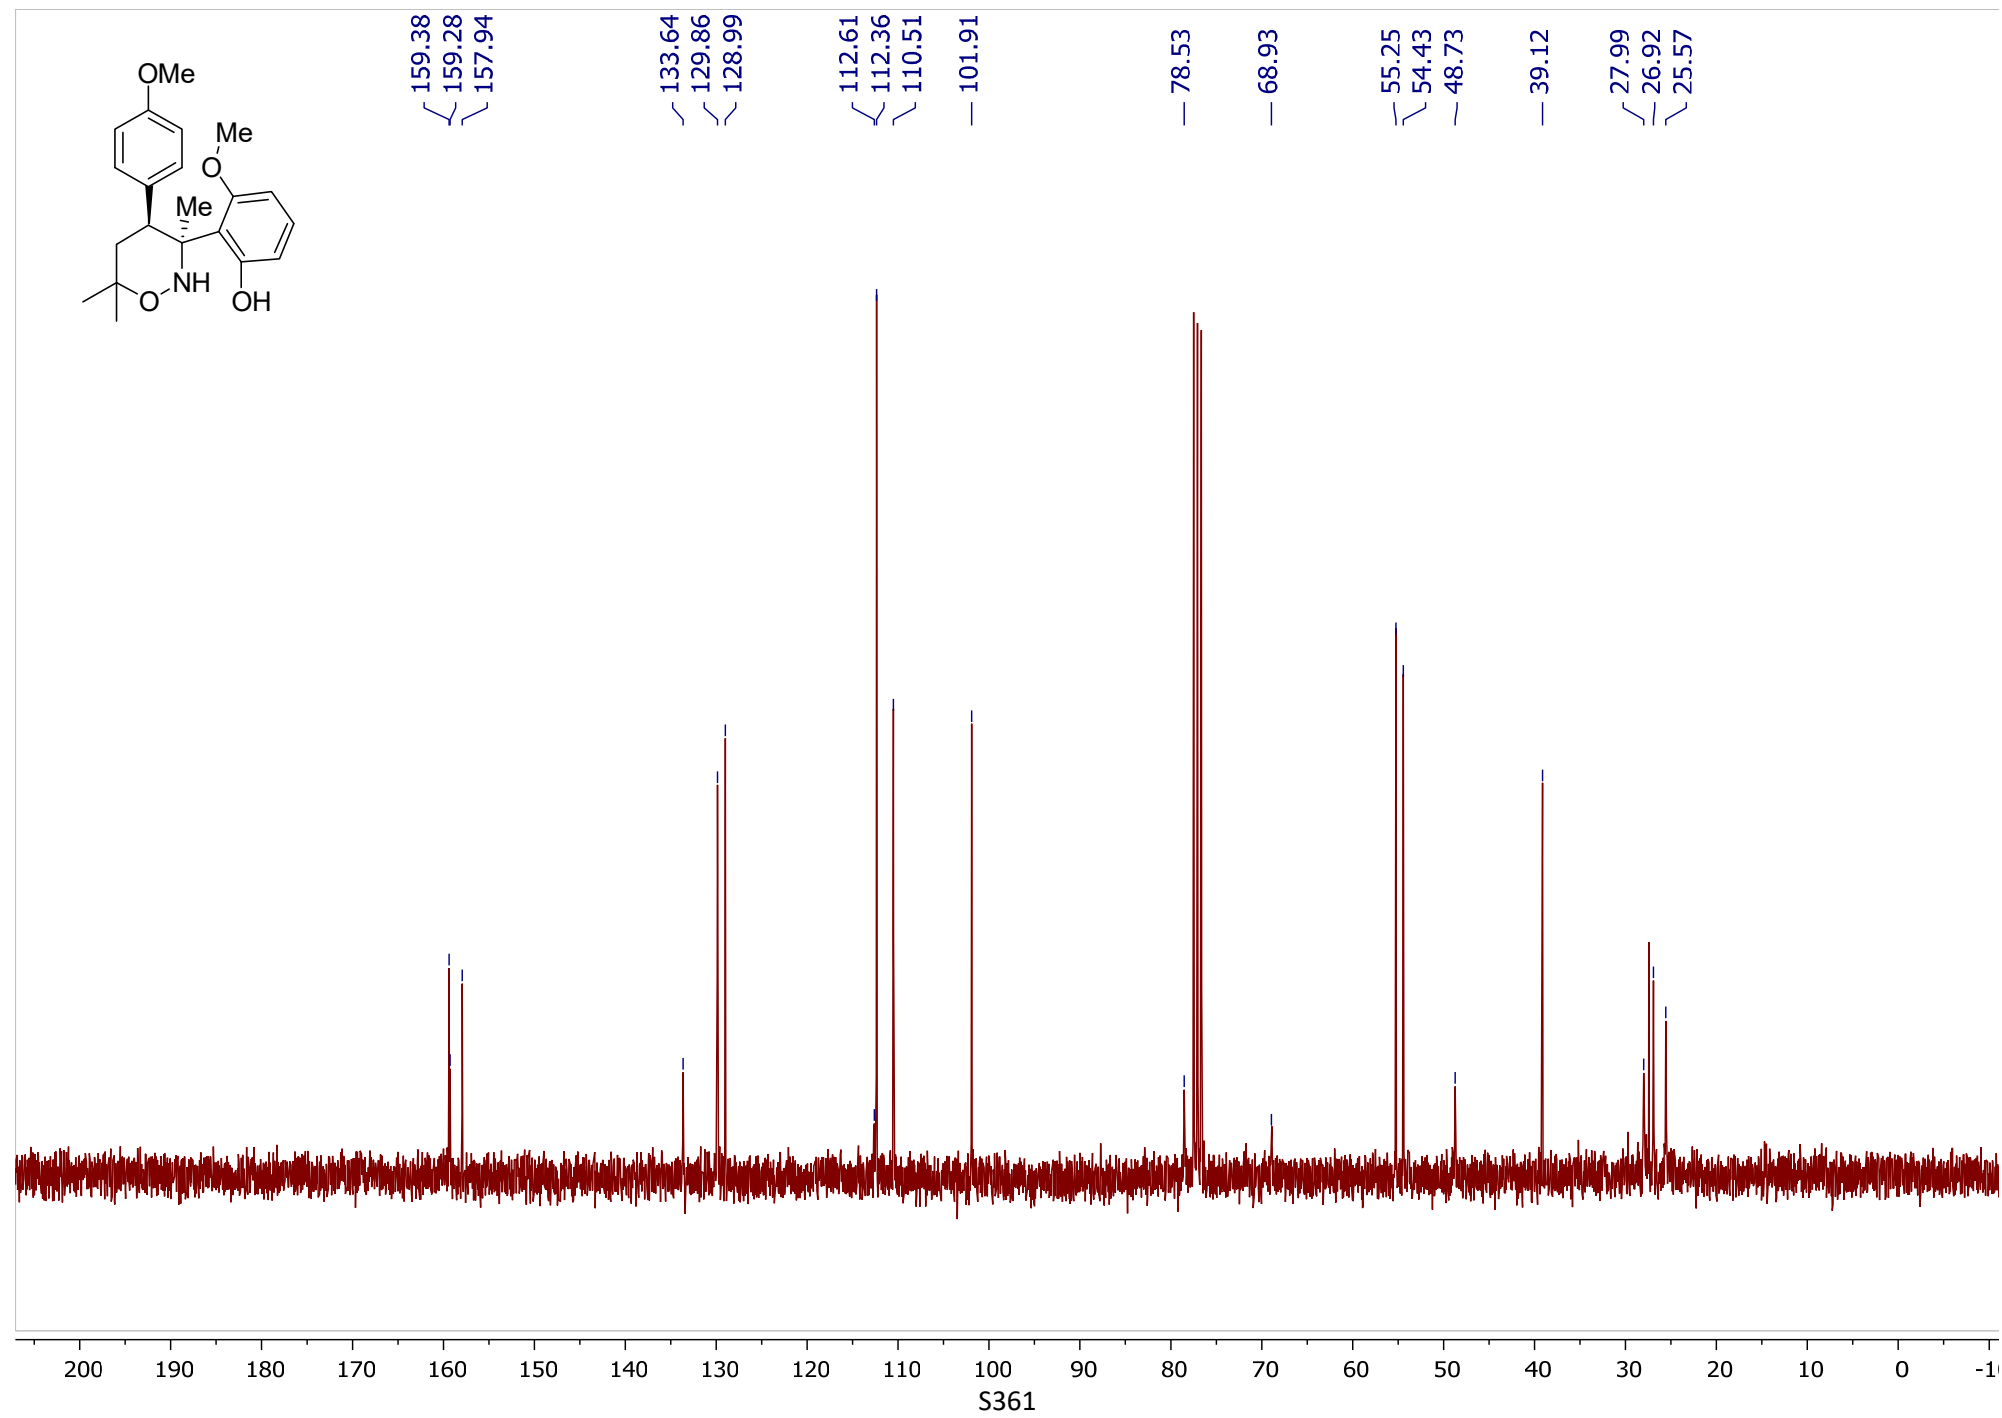

$^{13}\text{C}$  DEPT 135 (75 MHz,  $\text{CDCl}_3$ )

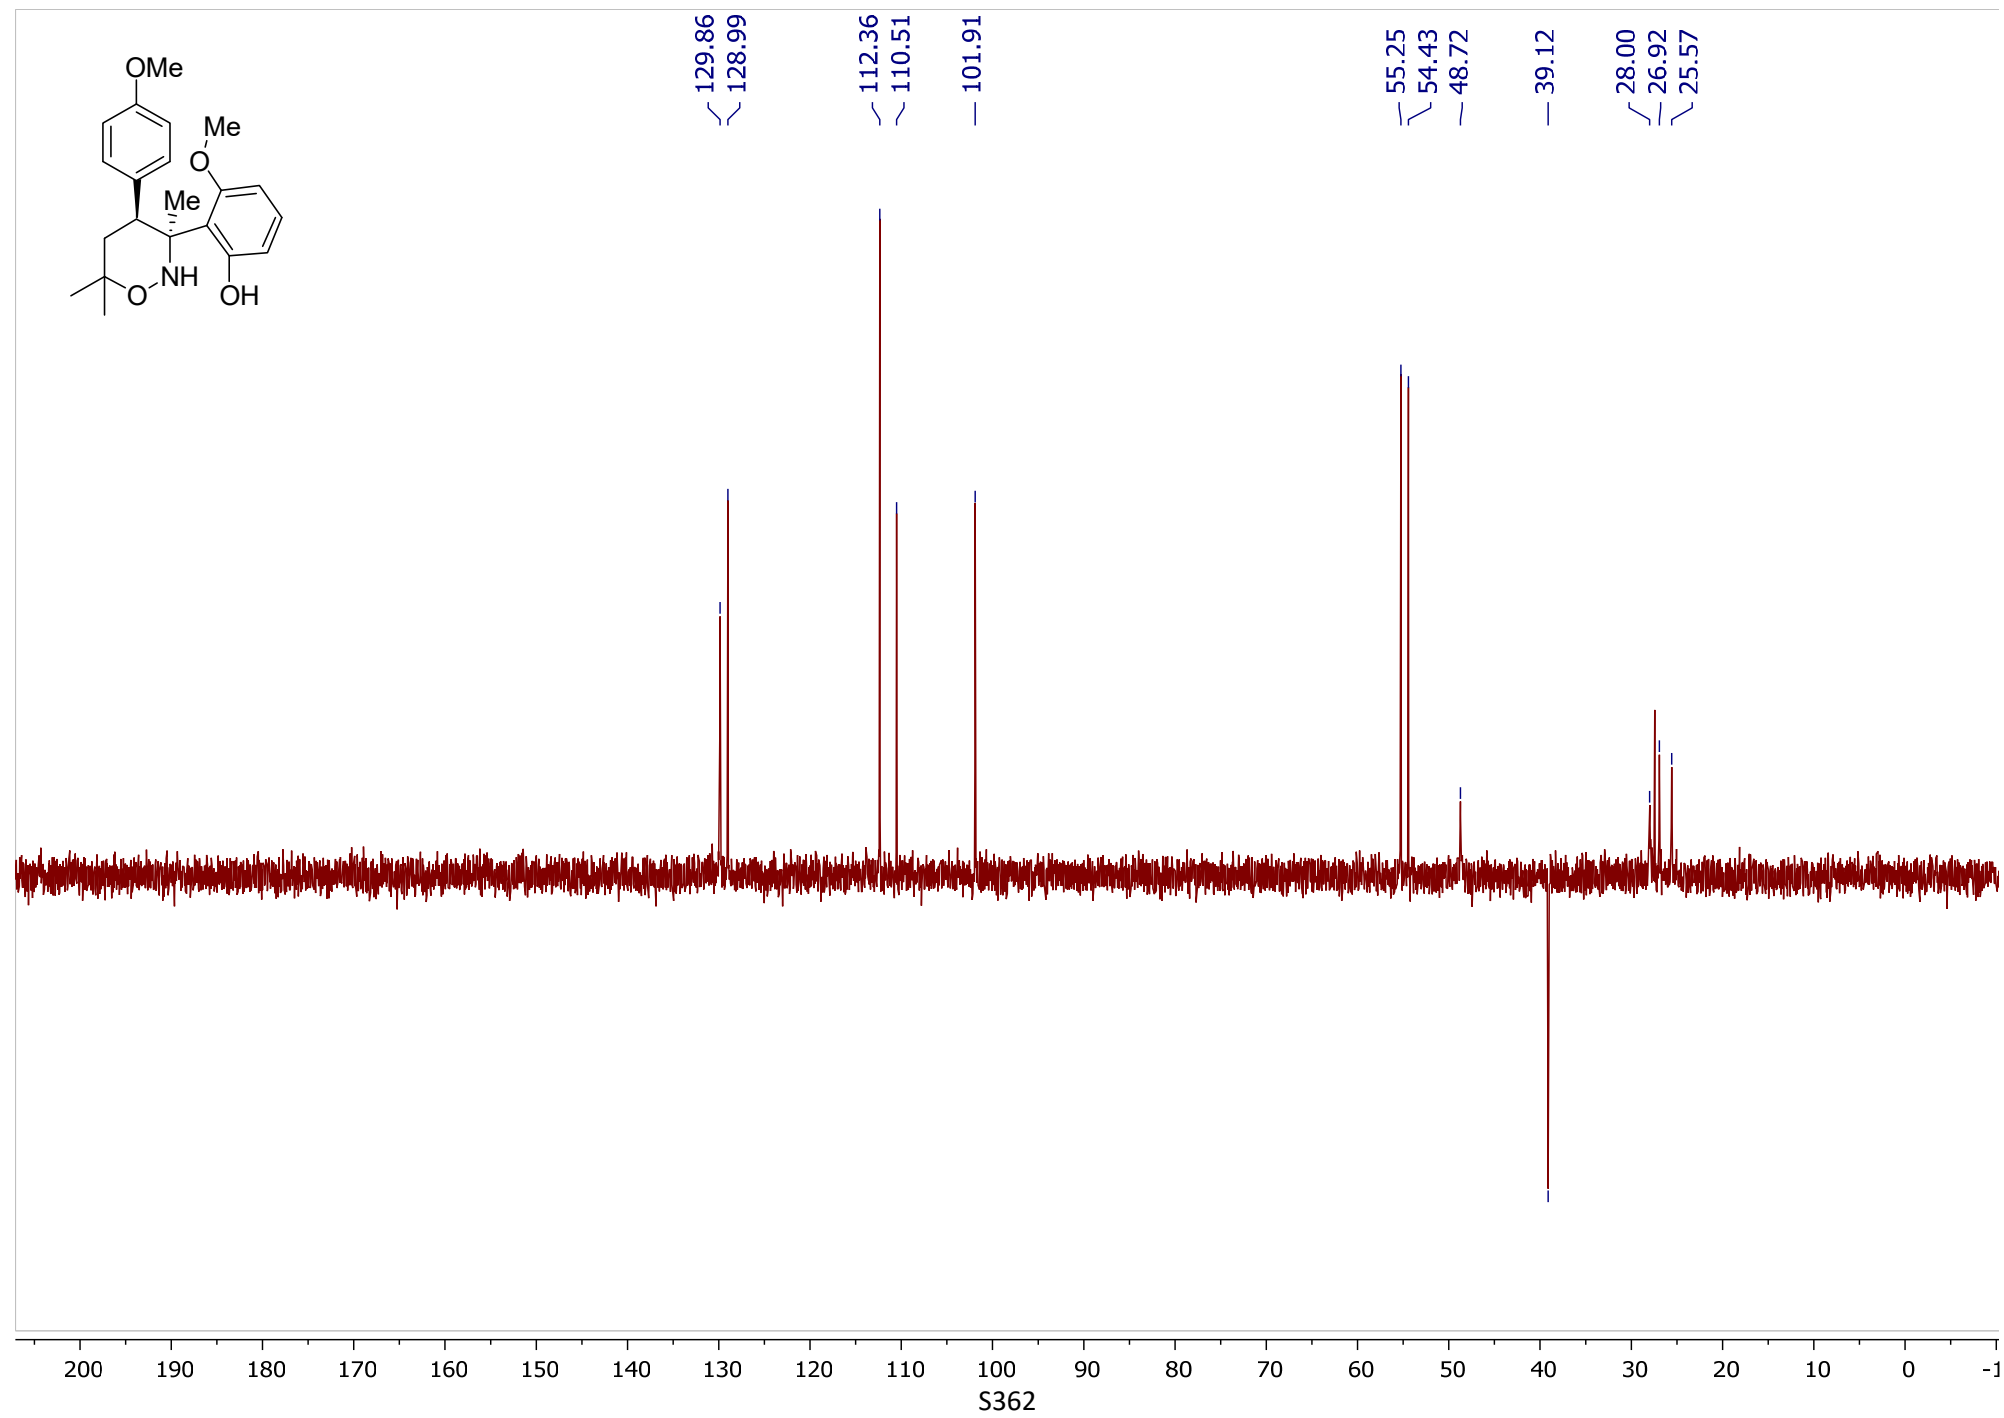

$^1\text{H}$ - $^1\text{H}$  COSY

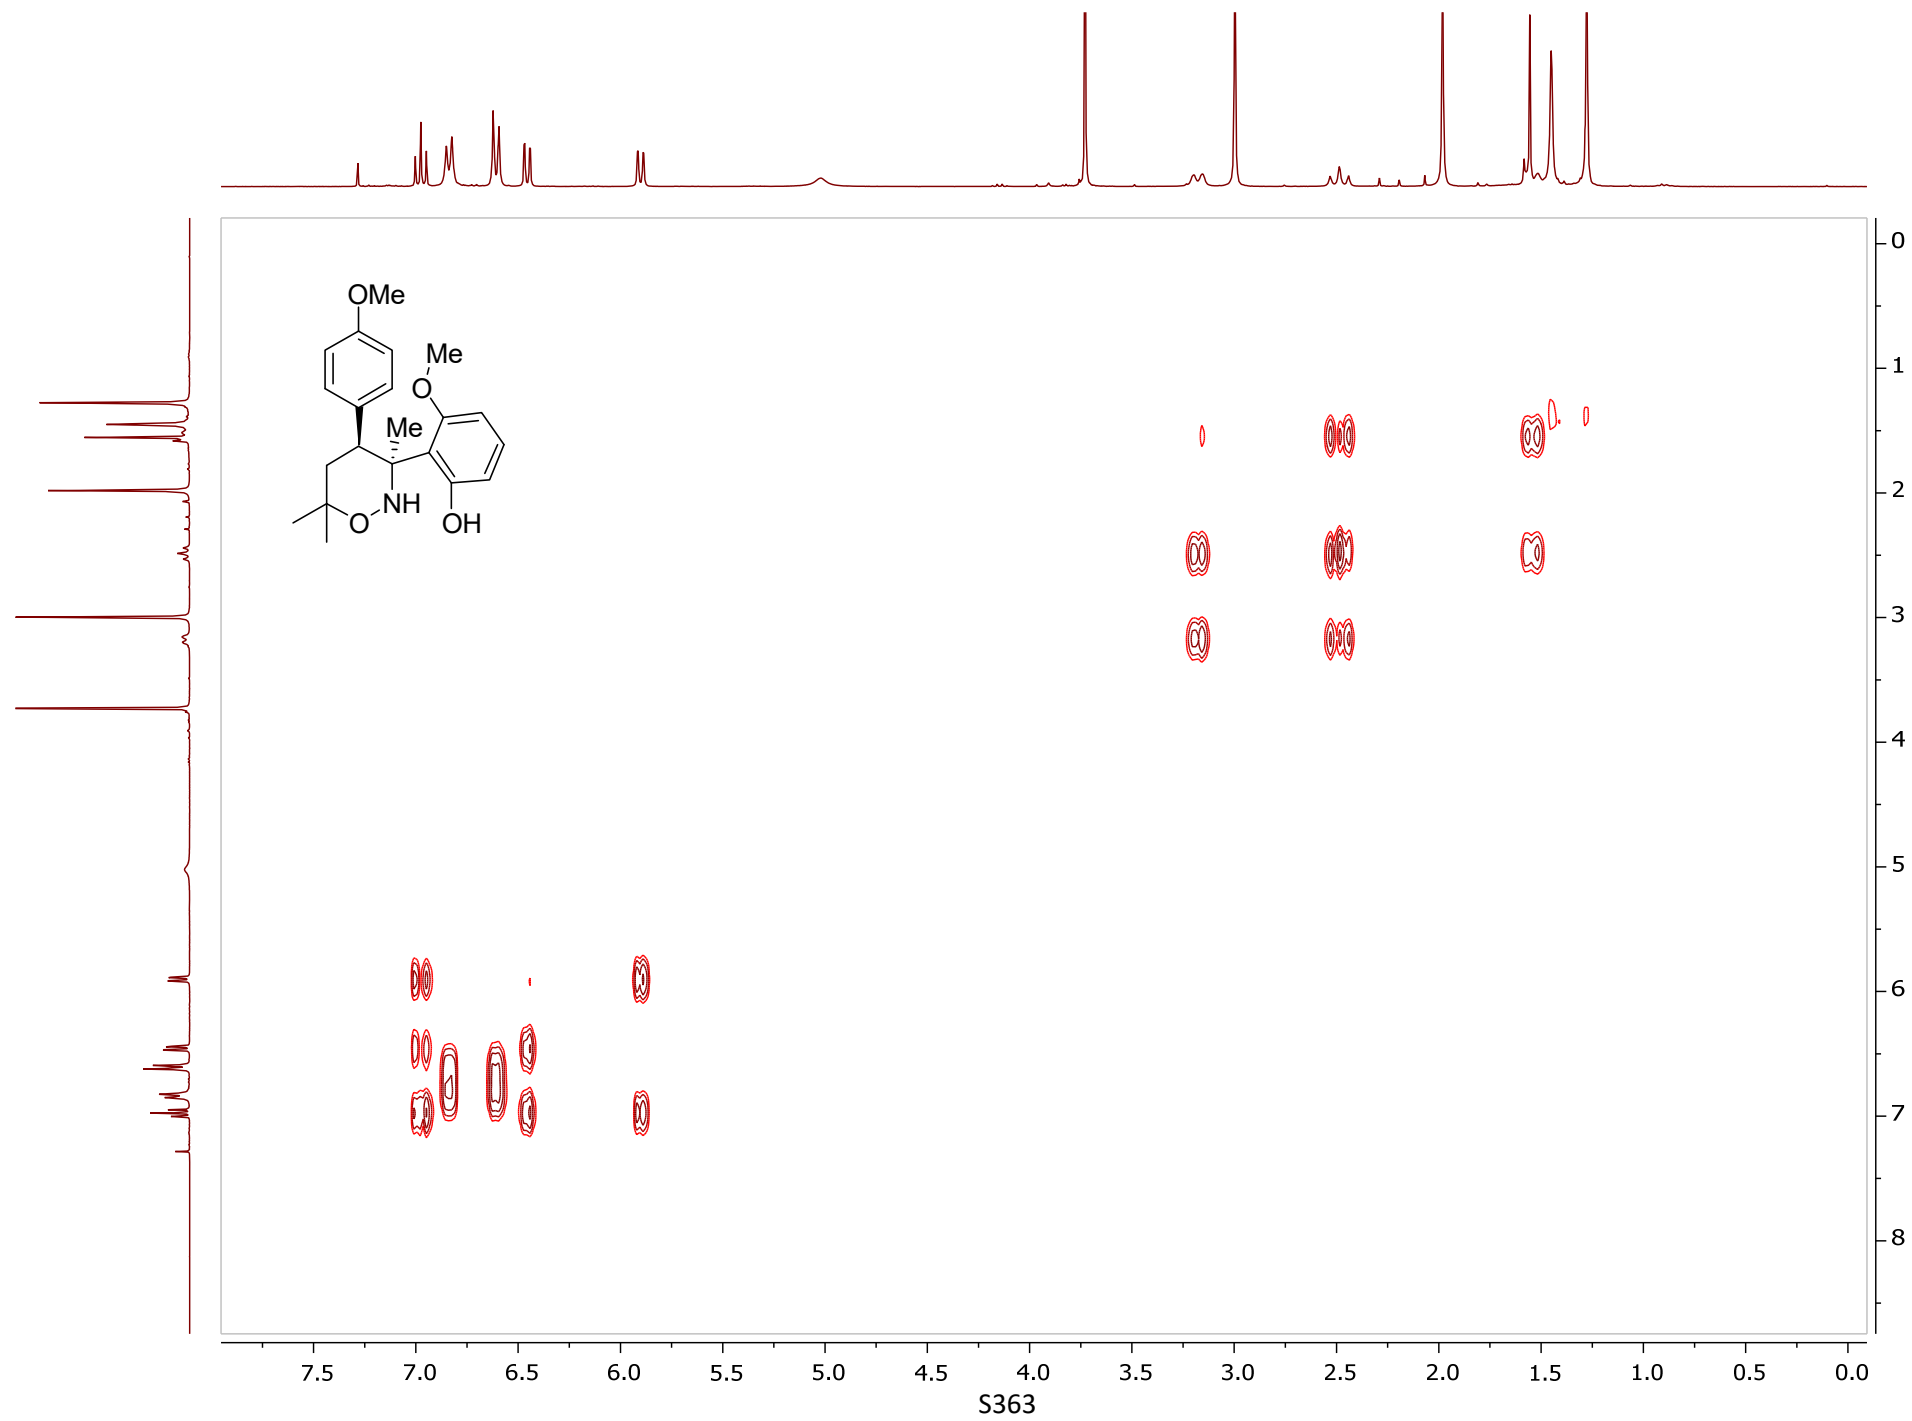

$^1\text{H}$ - $^{13}\text{C}$  HSQC

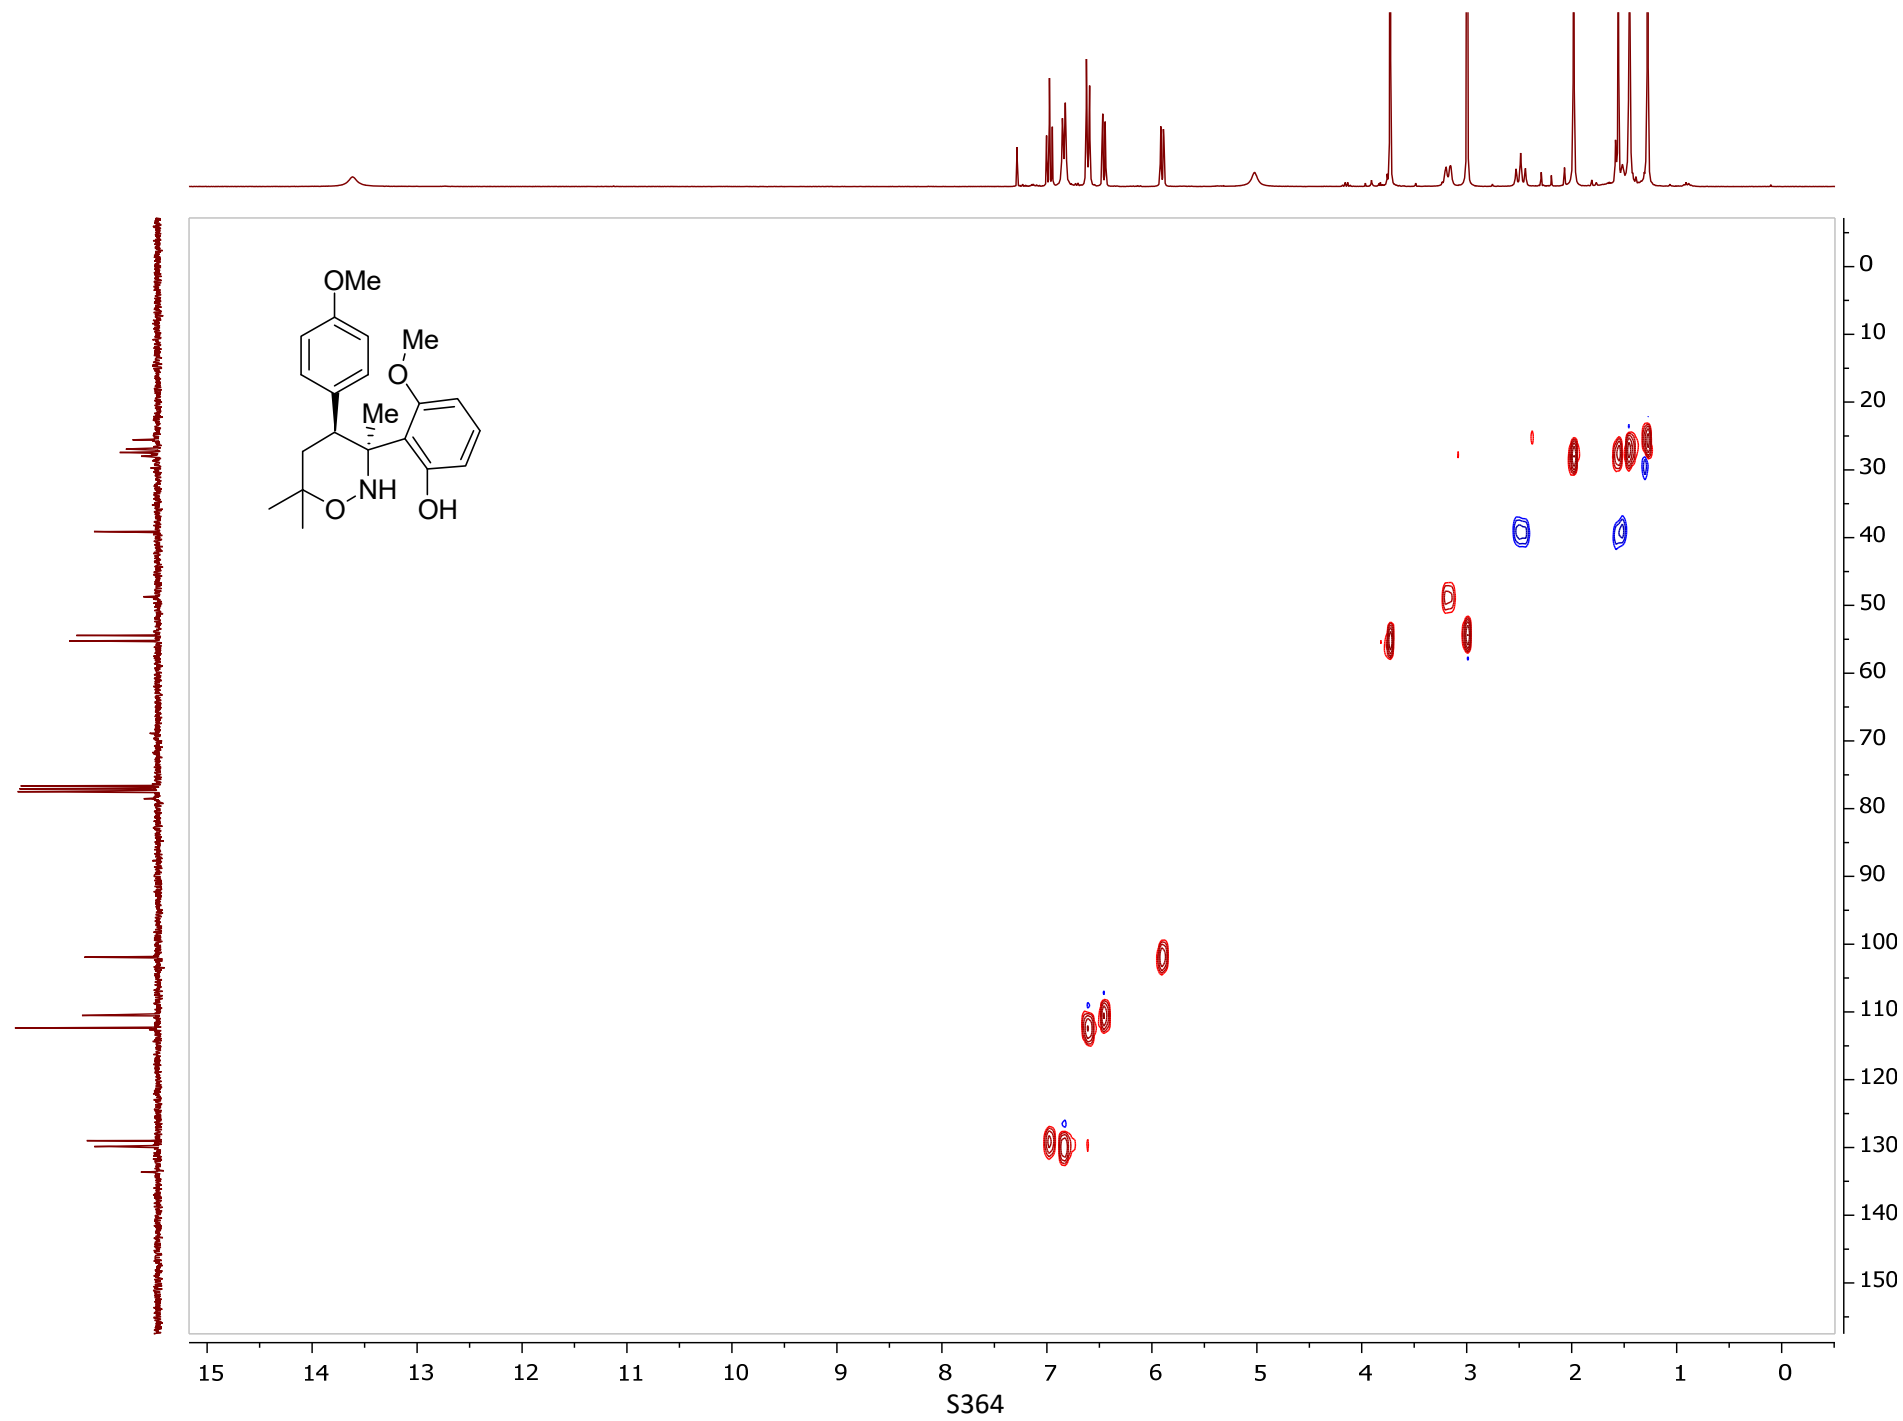

$^1\text{H}$ - $^{13}\text{C}$  HMBC

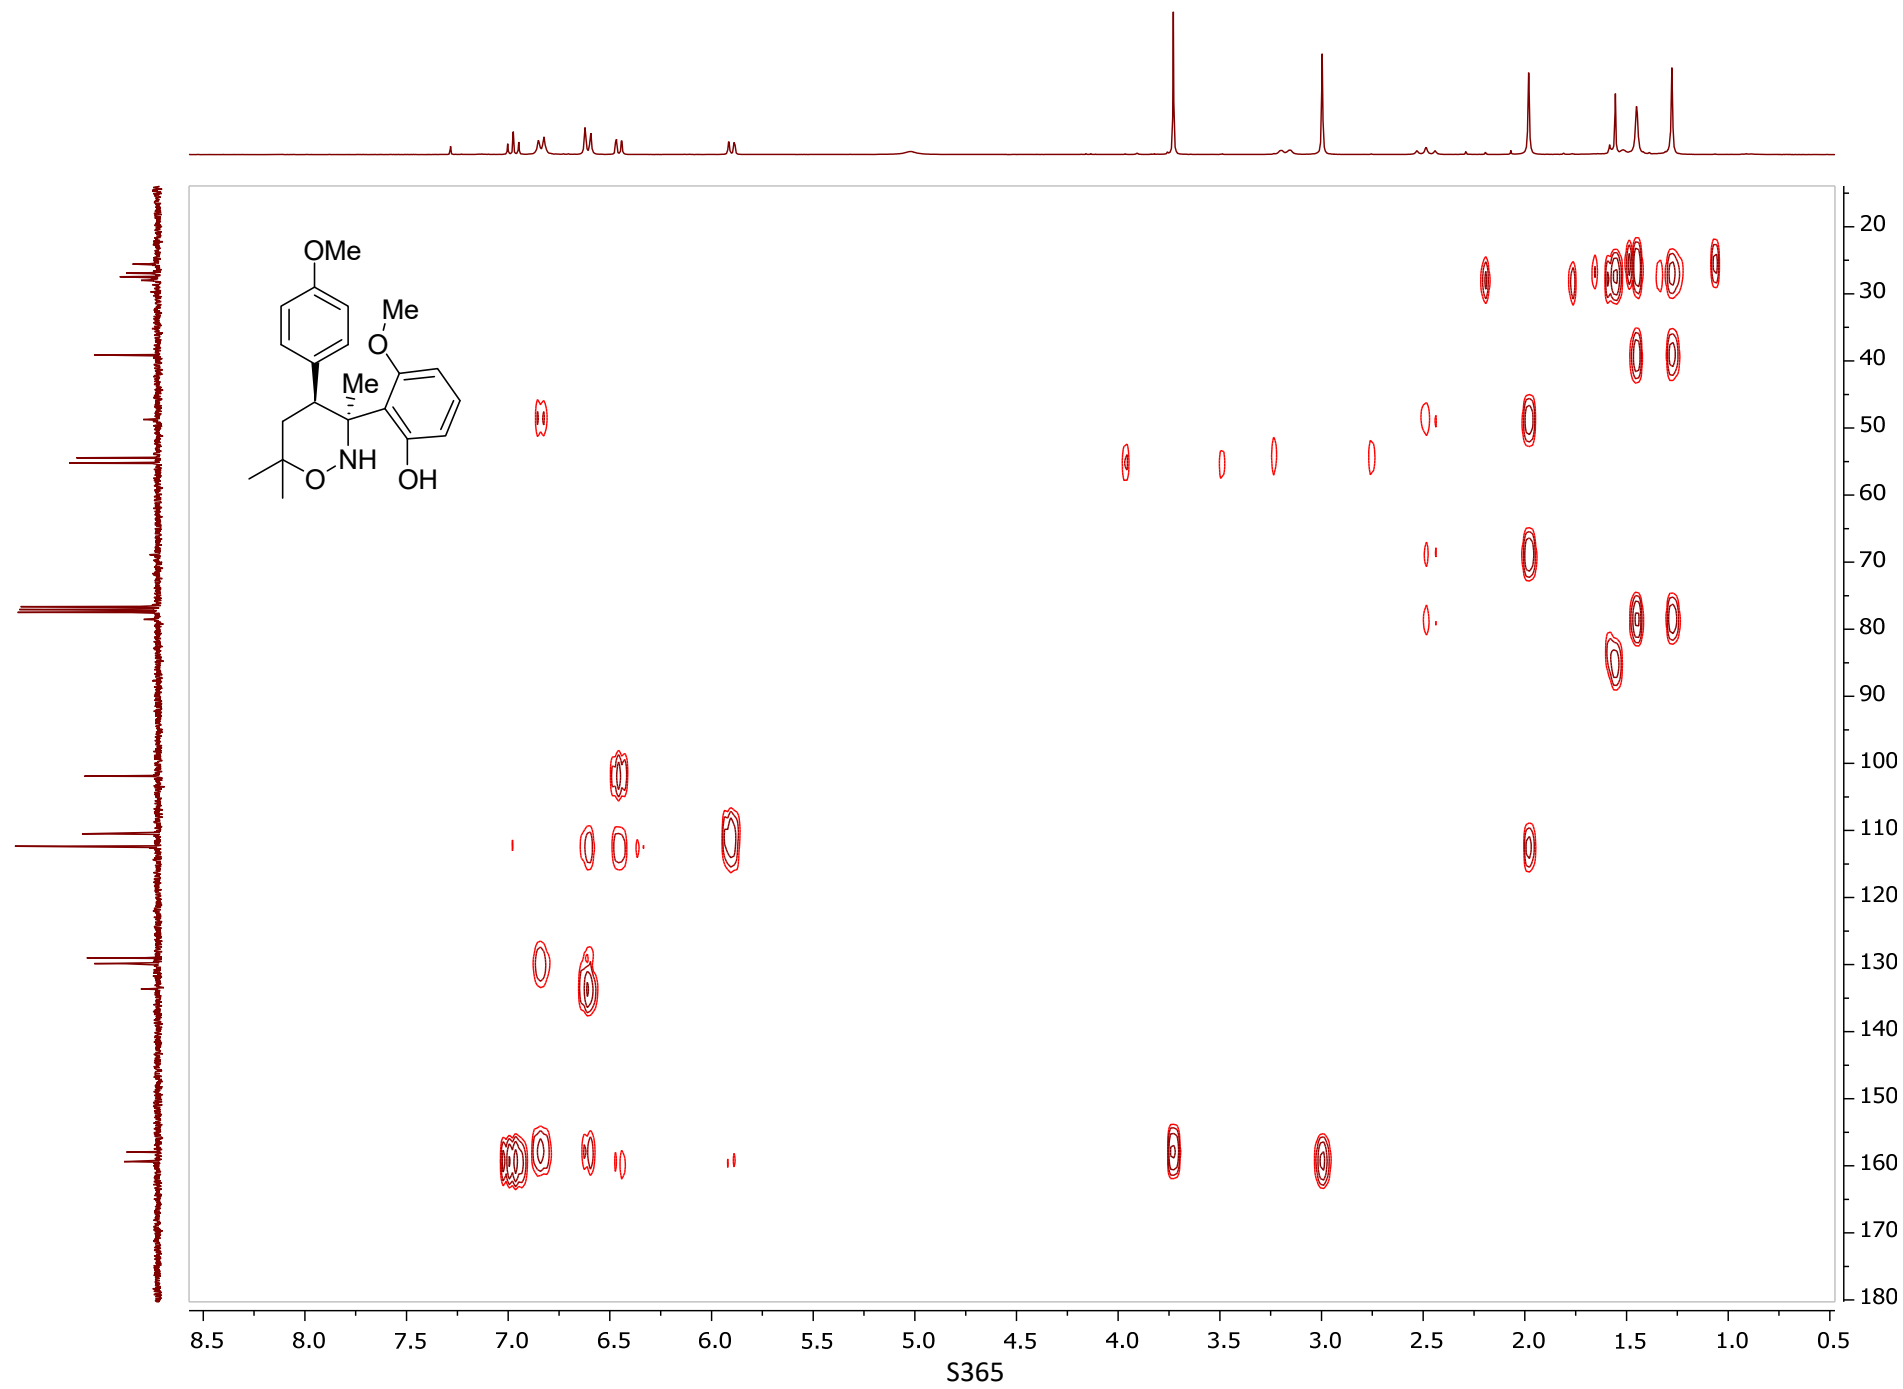

Diethyl 2-hydroxy-2-((4-methoxyphenyl)(2,2,2-trifluoroacetoxy)methyl)malonate 13

$^1\text{H}$  NMR (300 MHz,  $\text{CDCl}_3$ )

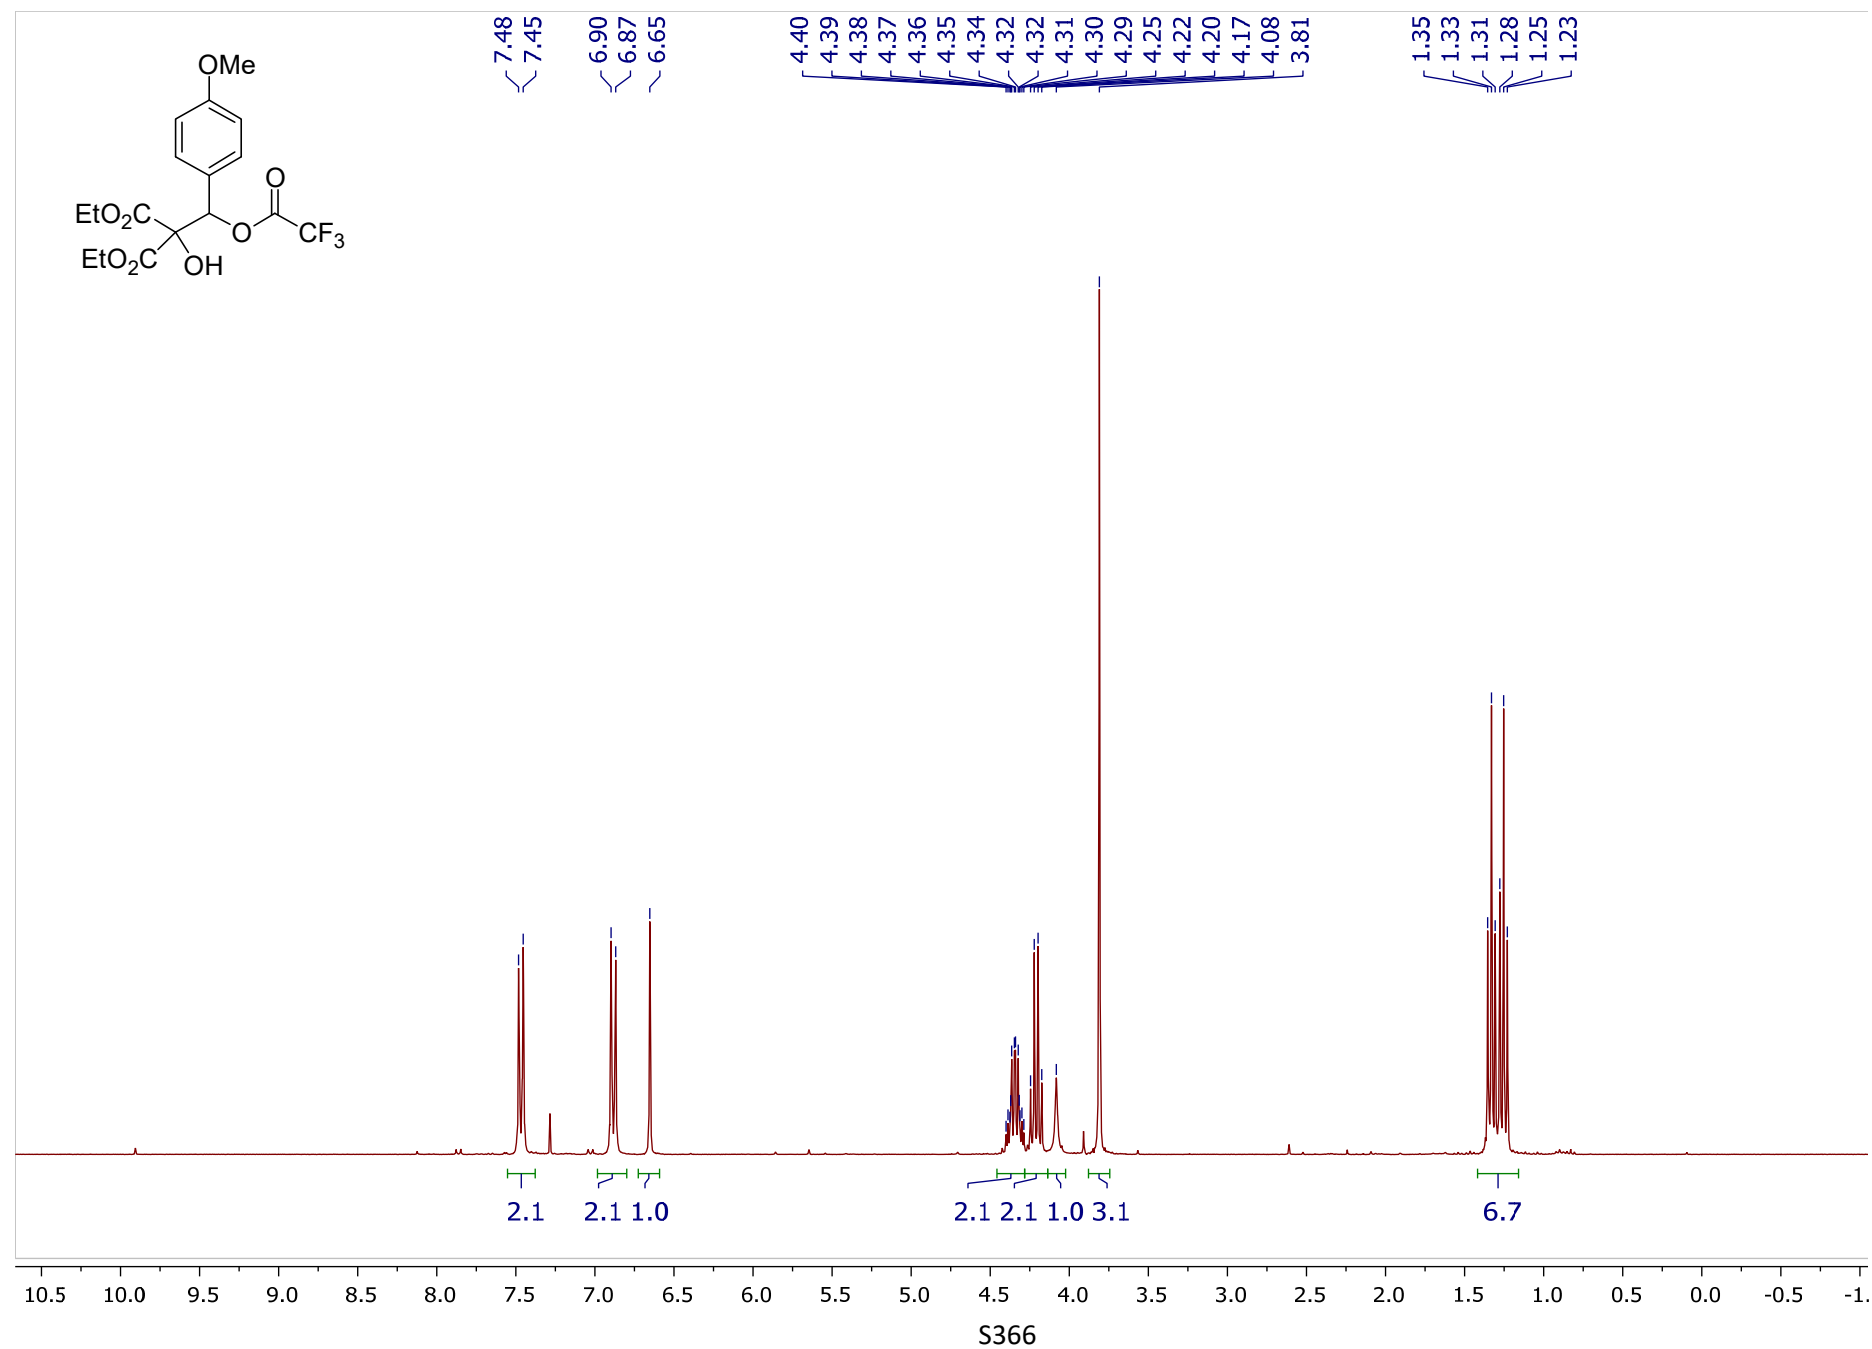

$^{13}\text{C}$  NMR (75 MHz,  $\text{CDCl}_3$ )

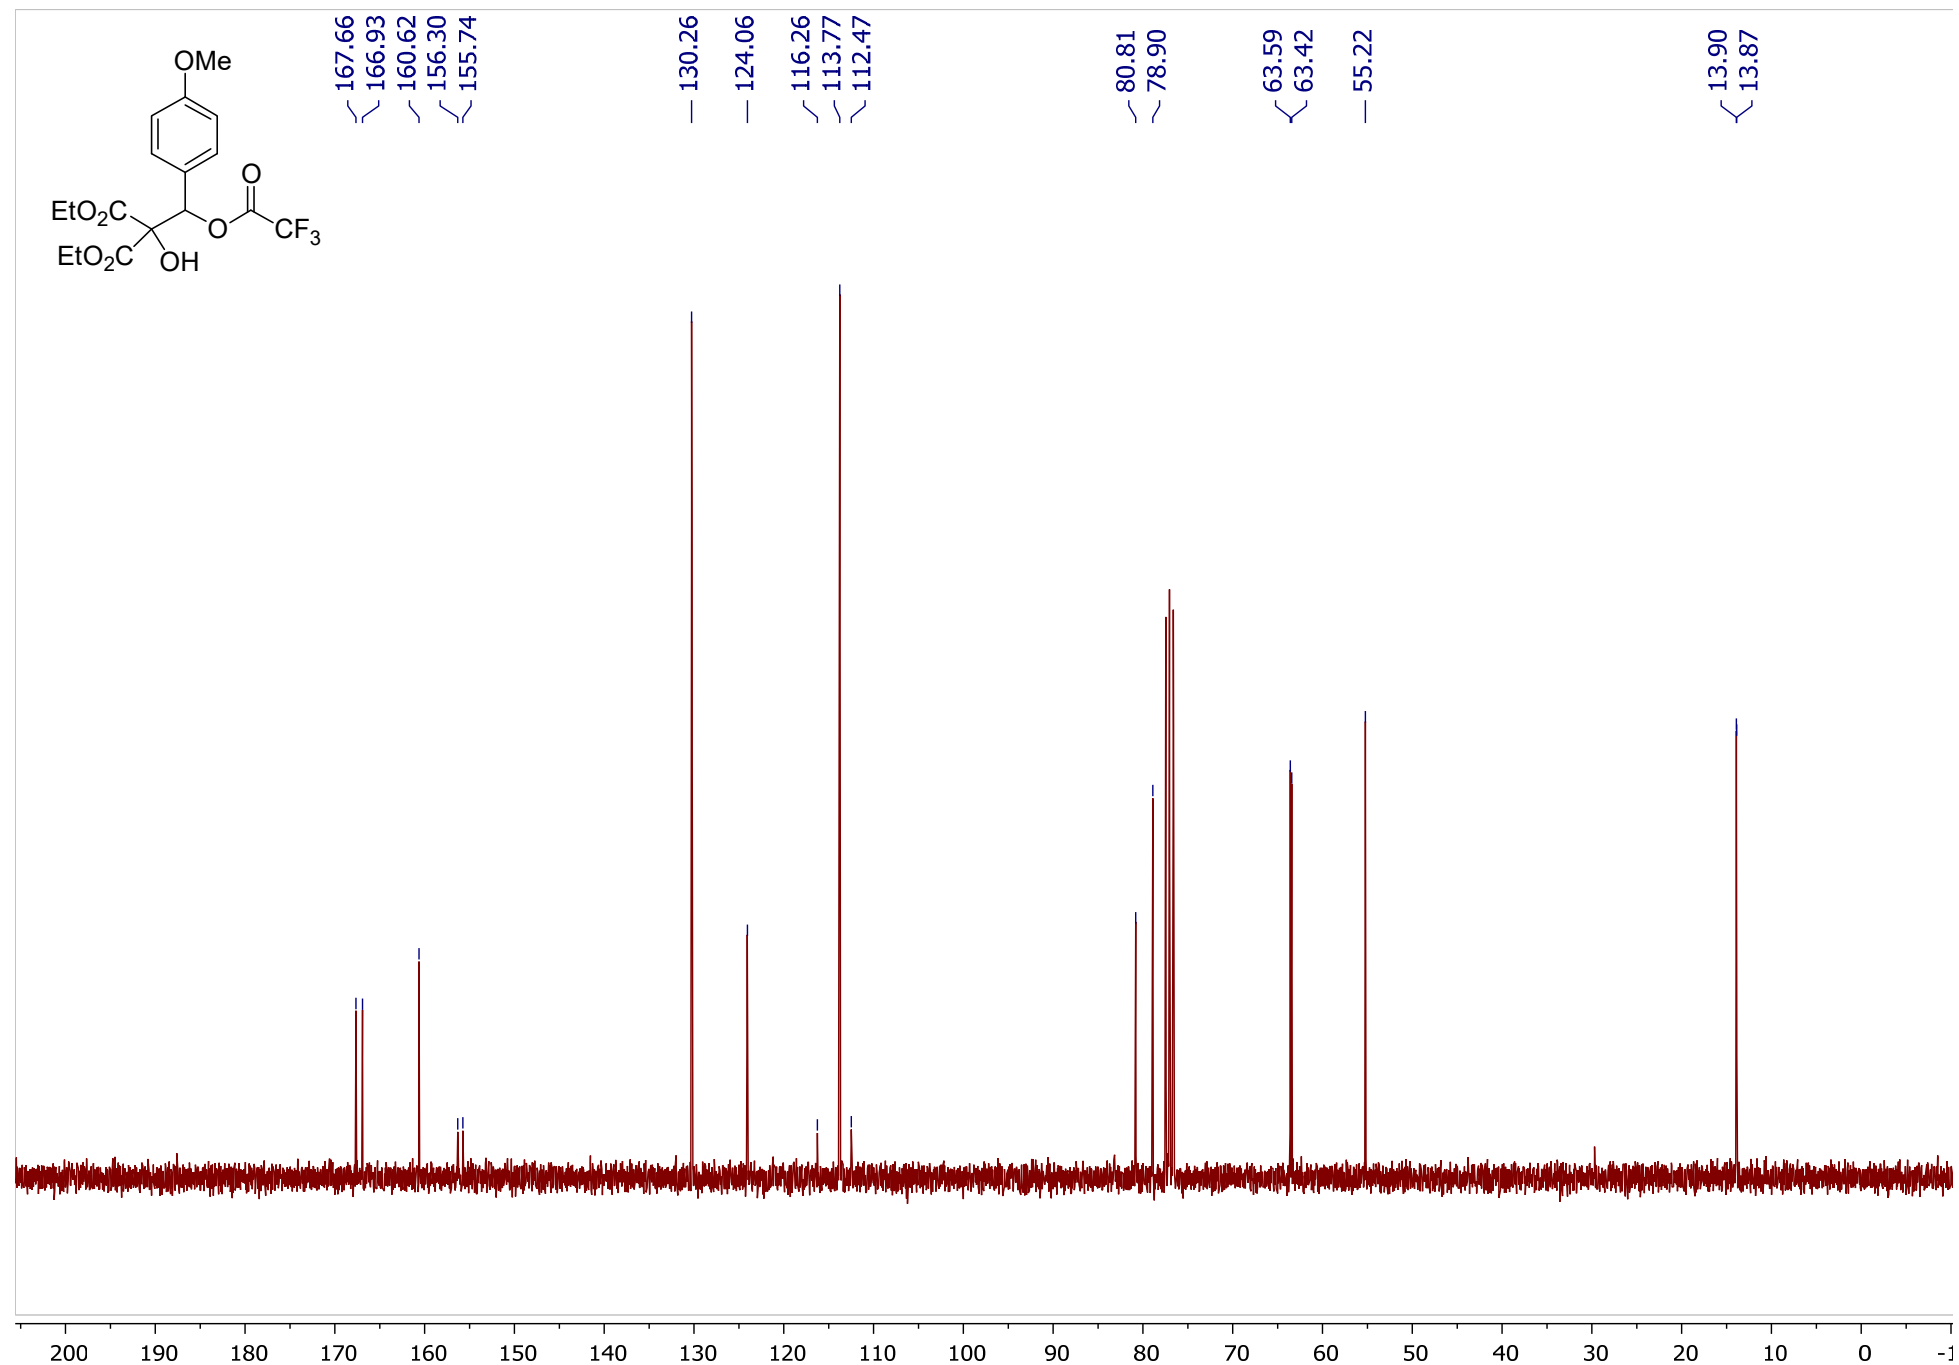

$^{13}\text{C}$  DEPT 135 (75 MHz,  $\text{CDCl}_3$ )

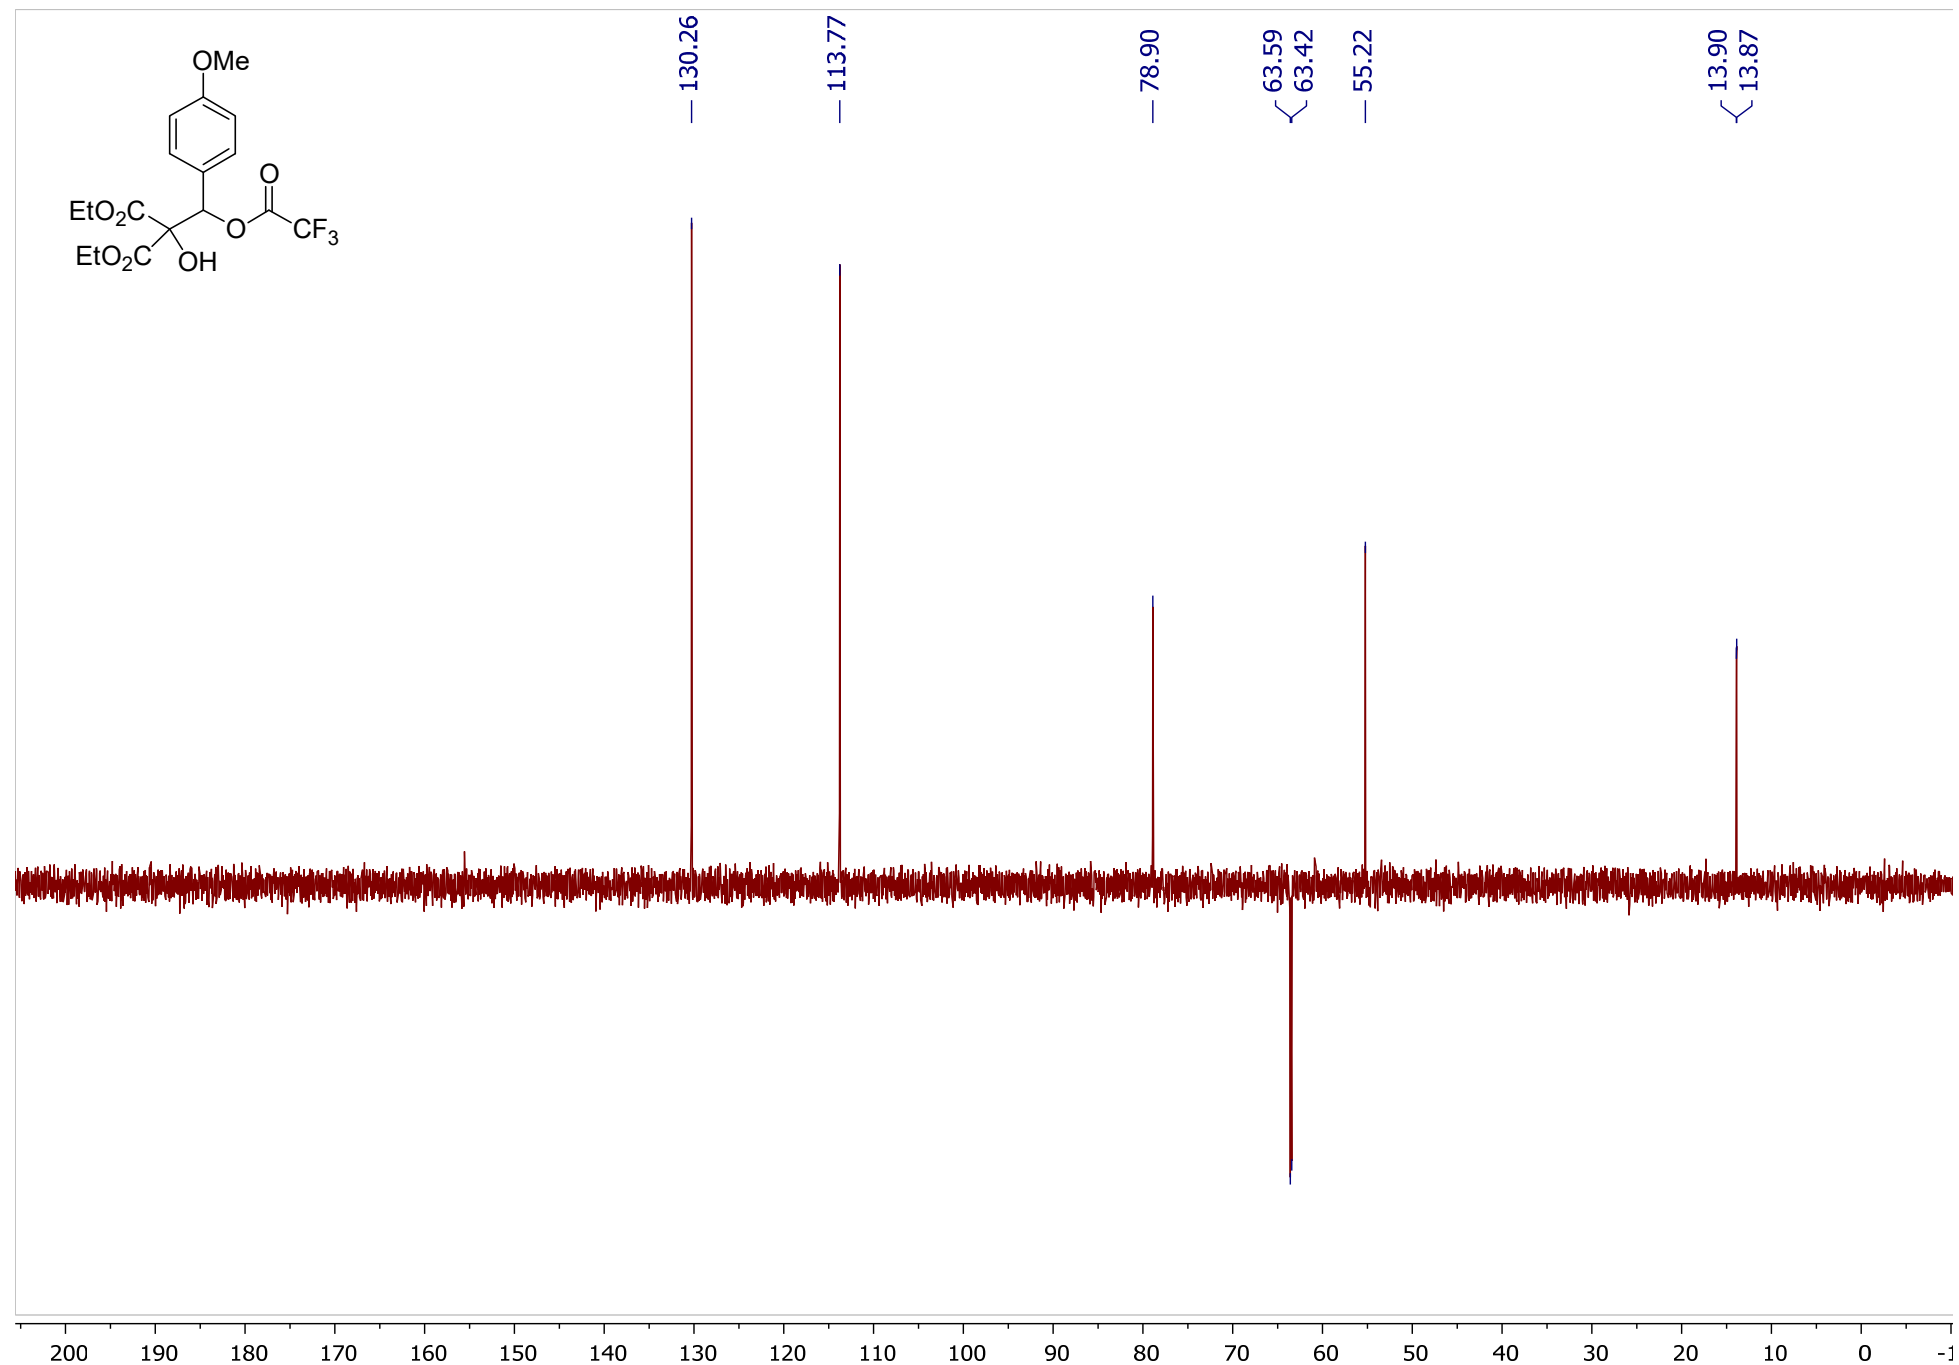

S368



$^{19}\text{F}$  NMR (282 MHz,  $\text{CDCl}_3$ )

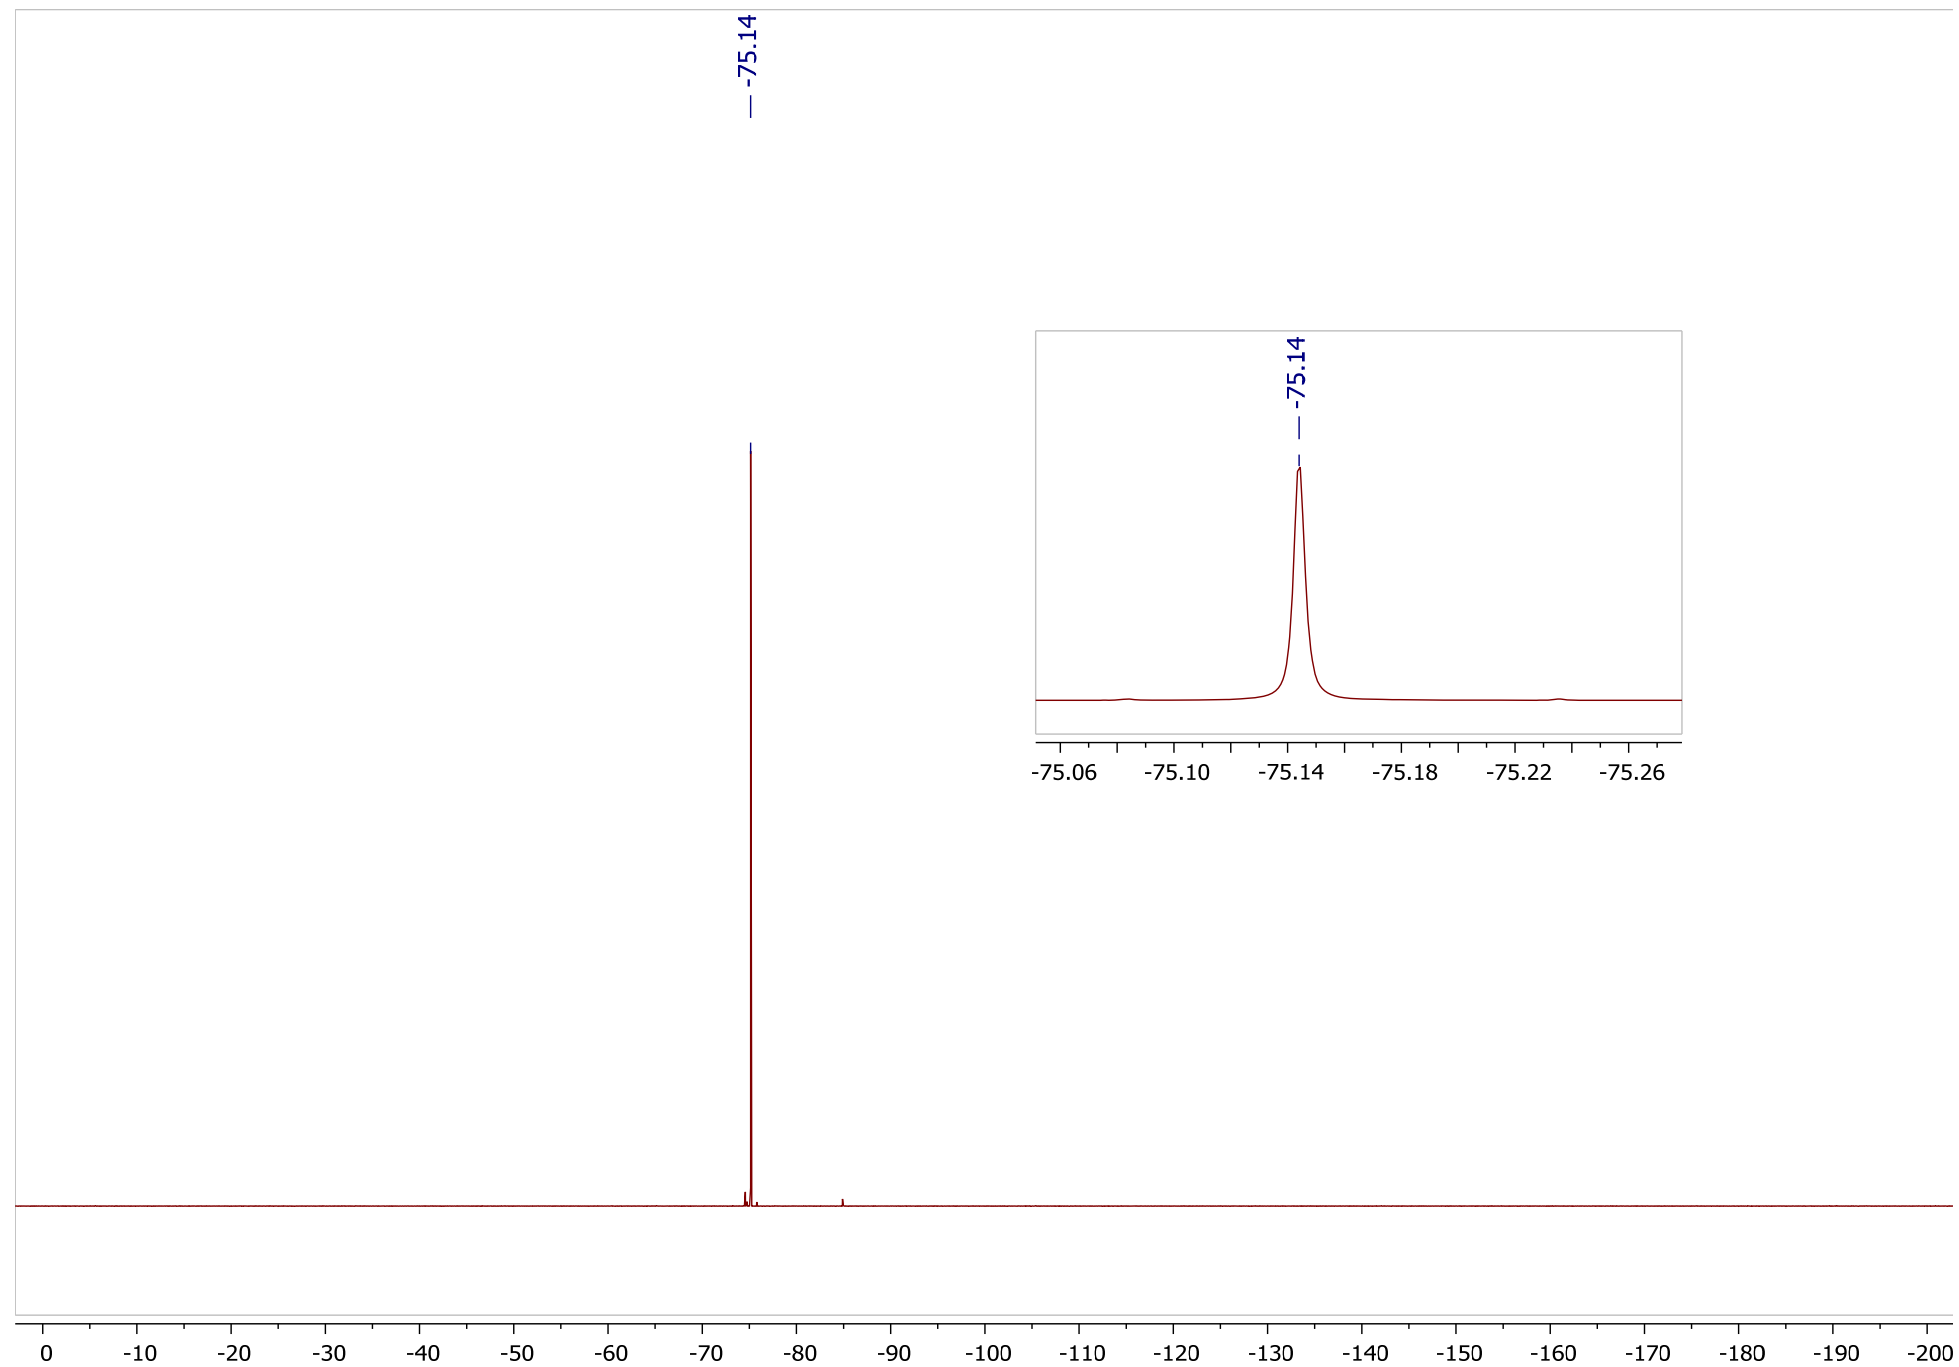

$^1\text{H}-^{13}\text{C}$  HSQC

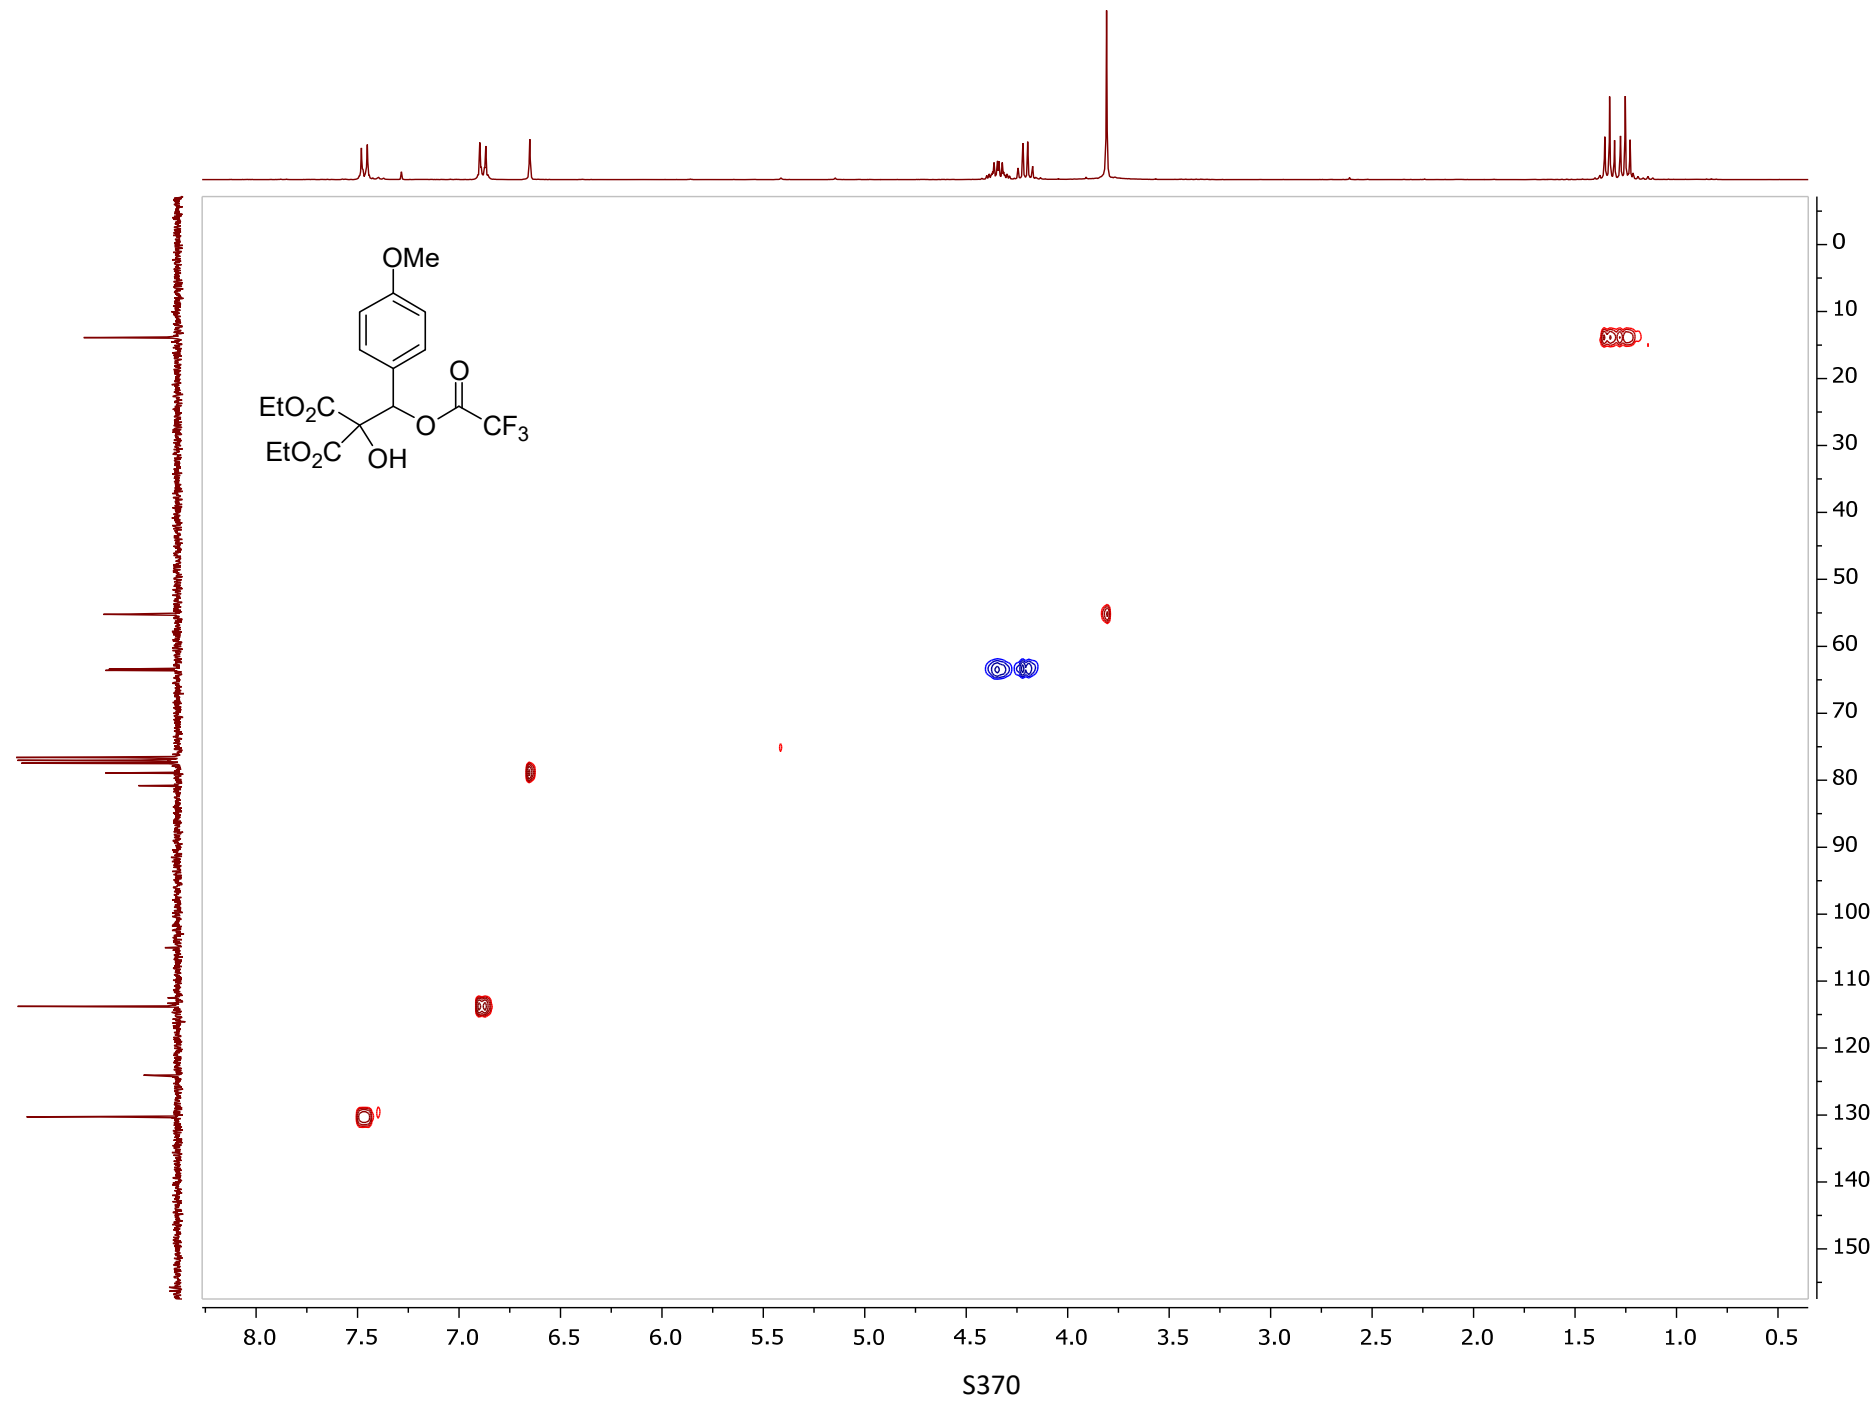

$^1\text{H}$ - $^{13}\text{C}$  HMBC

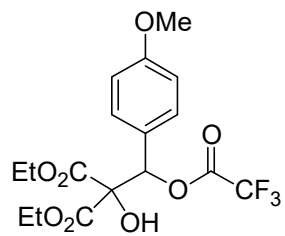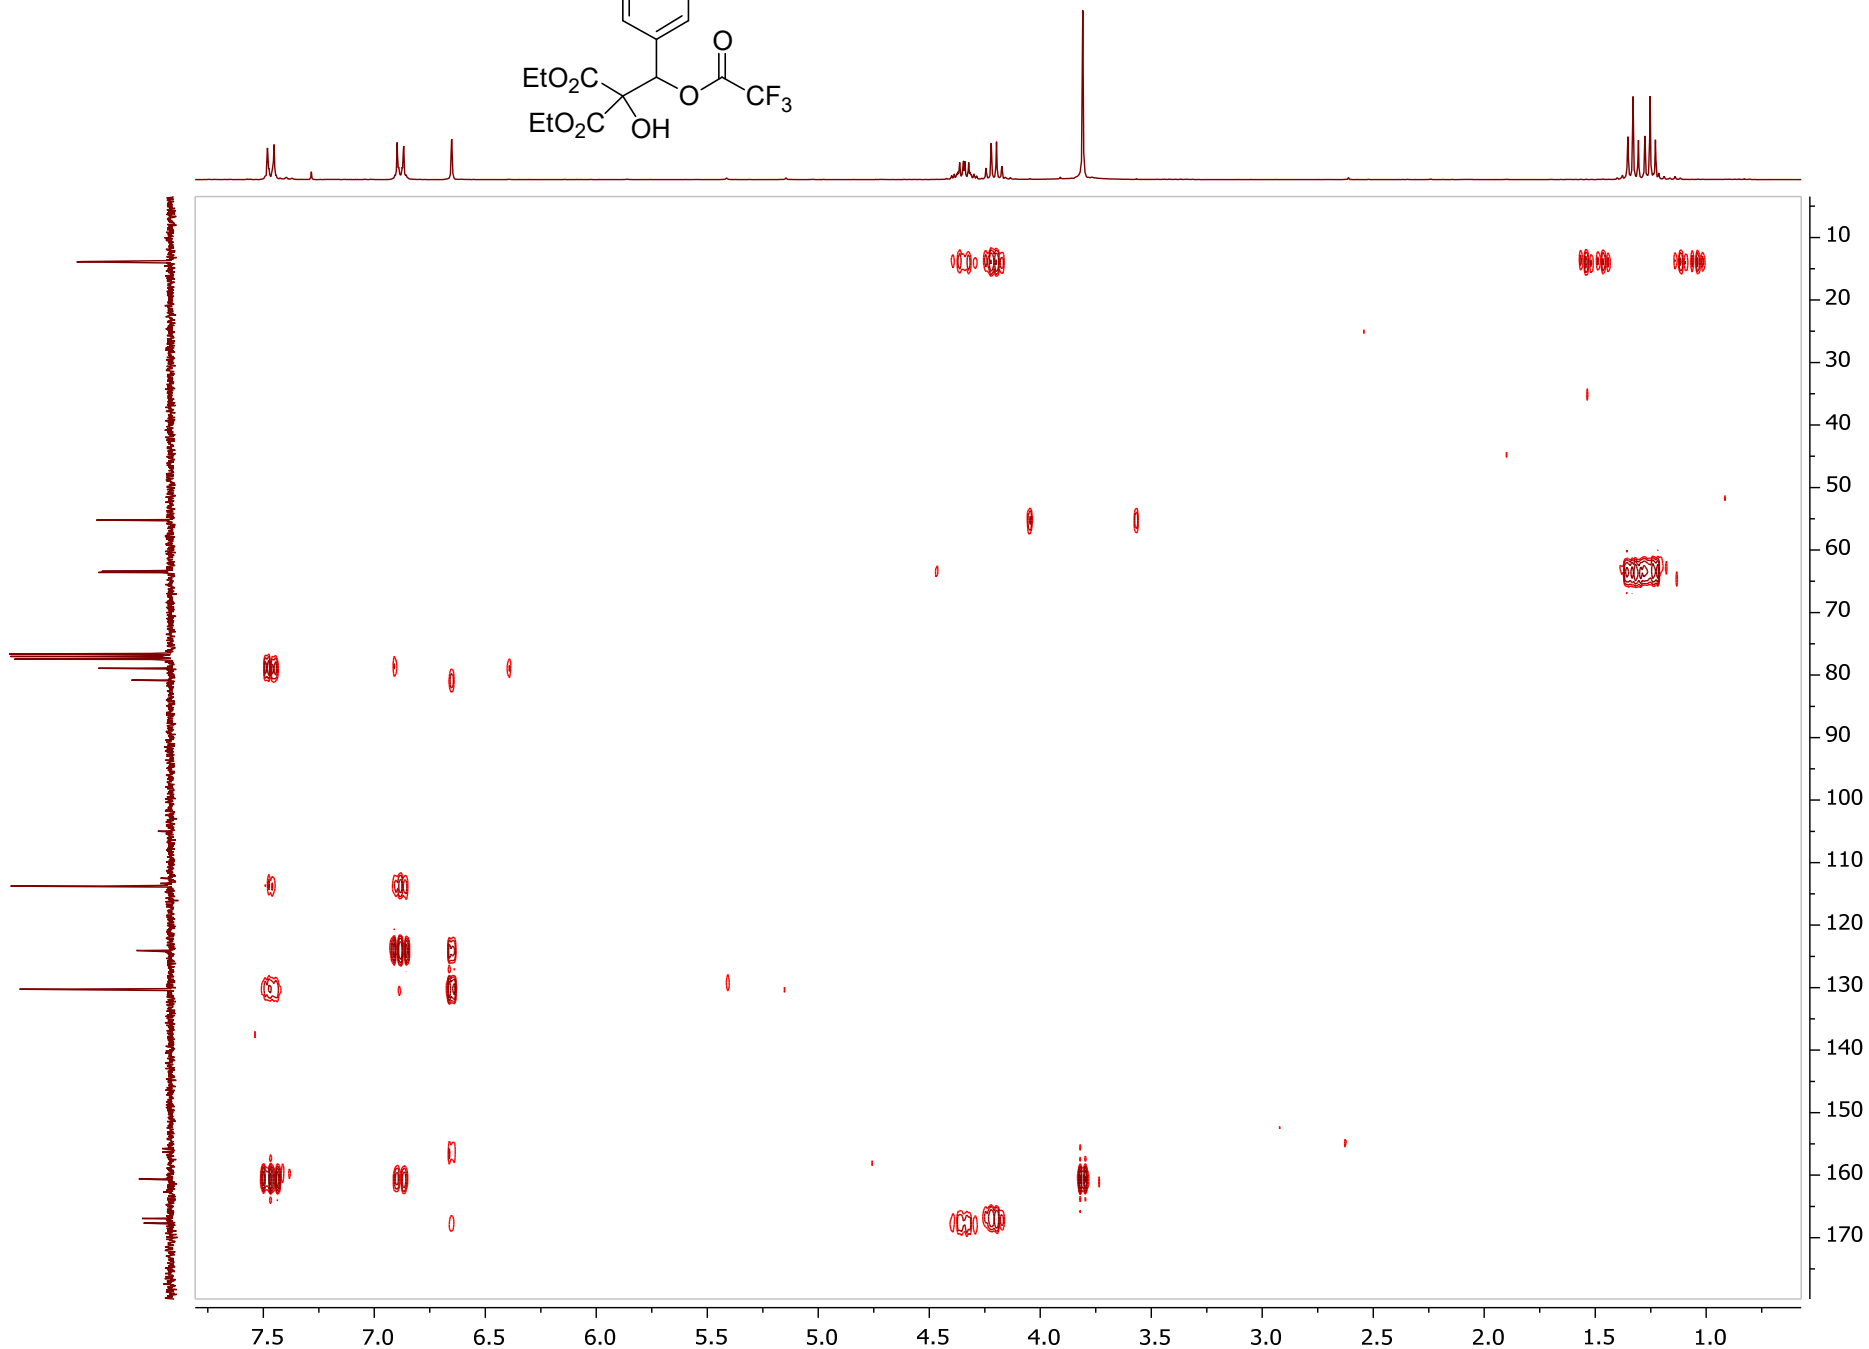

S371

# Detection of 3-methyl benzisoxazoles 15 in reaction mixture

<sup>1</sup>H NMR (300 MHz, CDCl<sub>3</sub>) of reaction mixture

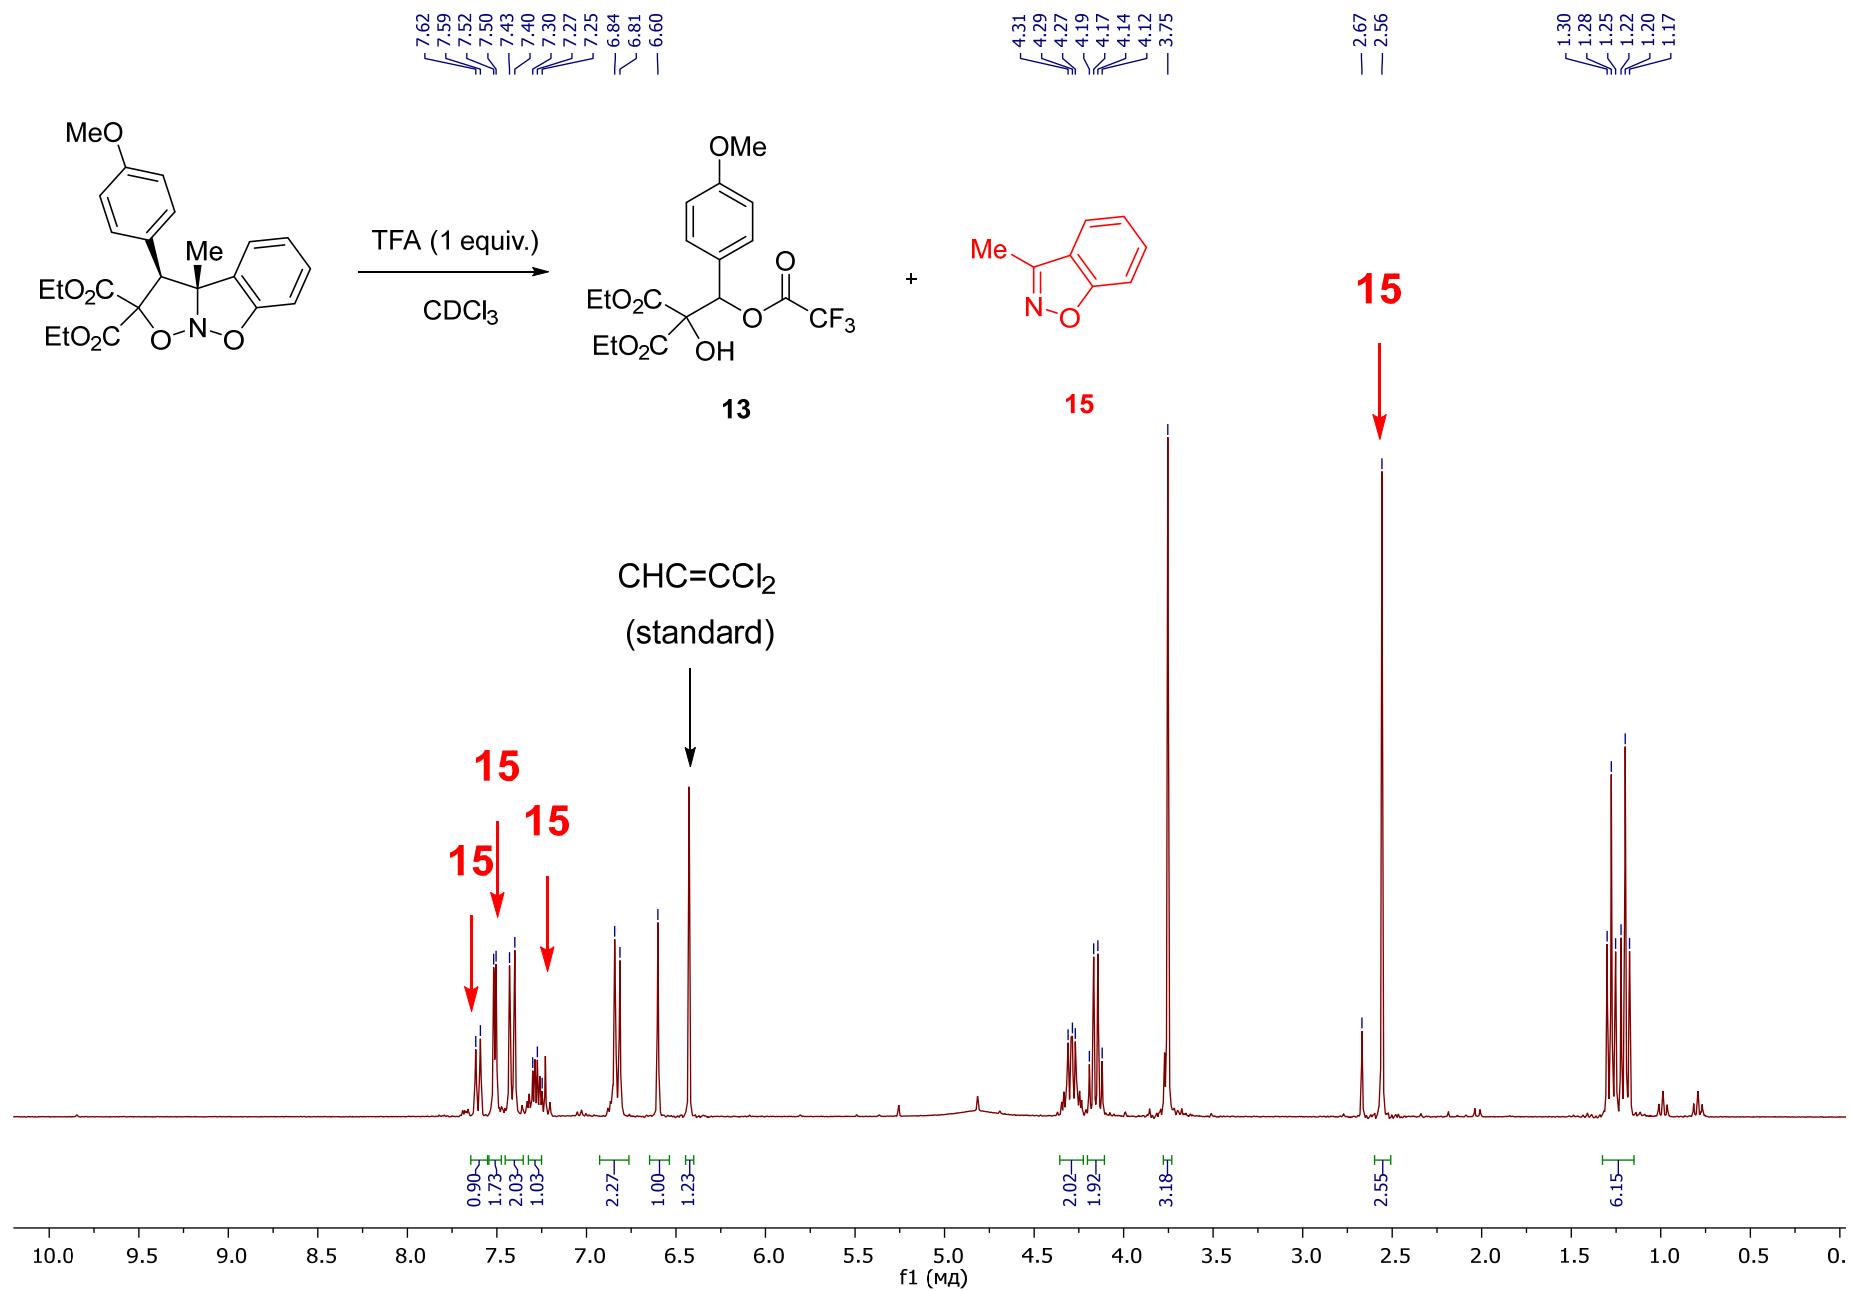

<sup>13</sup>C NMR (75 MHz, CDCl<sub>3</sub>) of reaction mixture

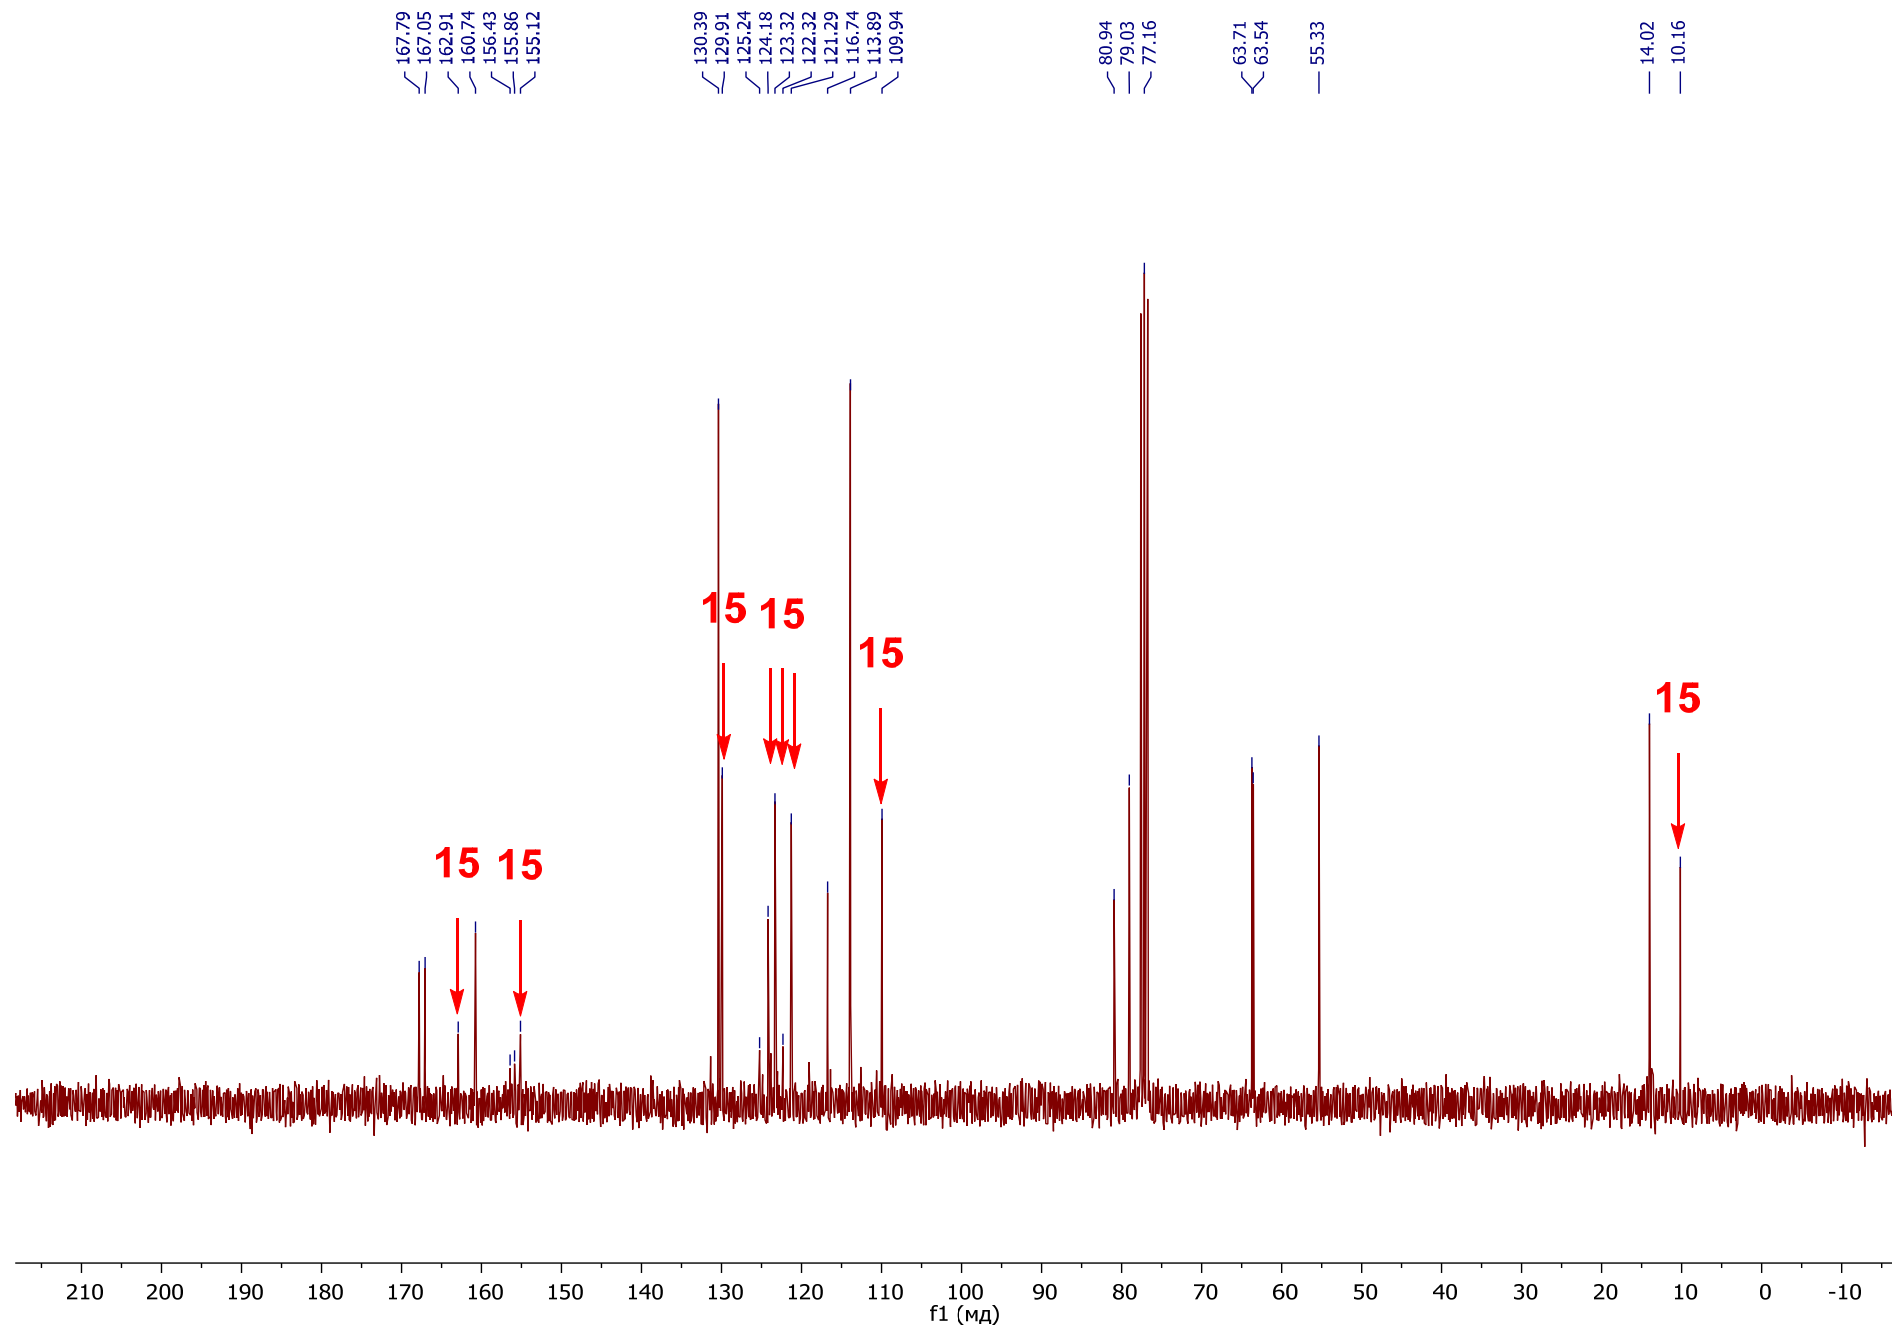

# GC-MS chromatogram and MS database search

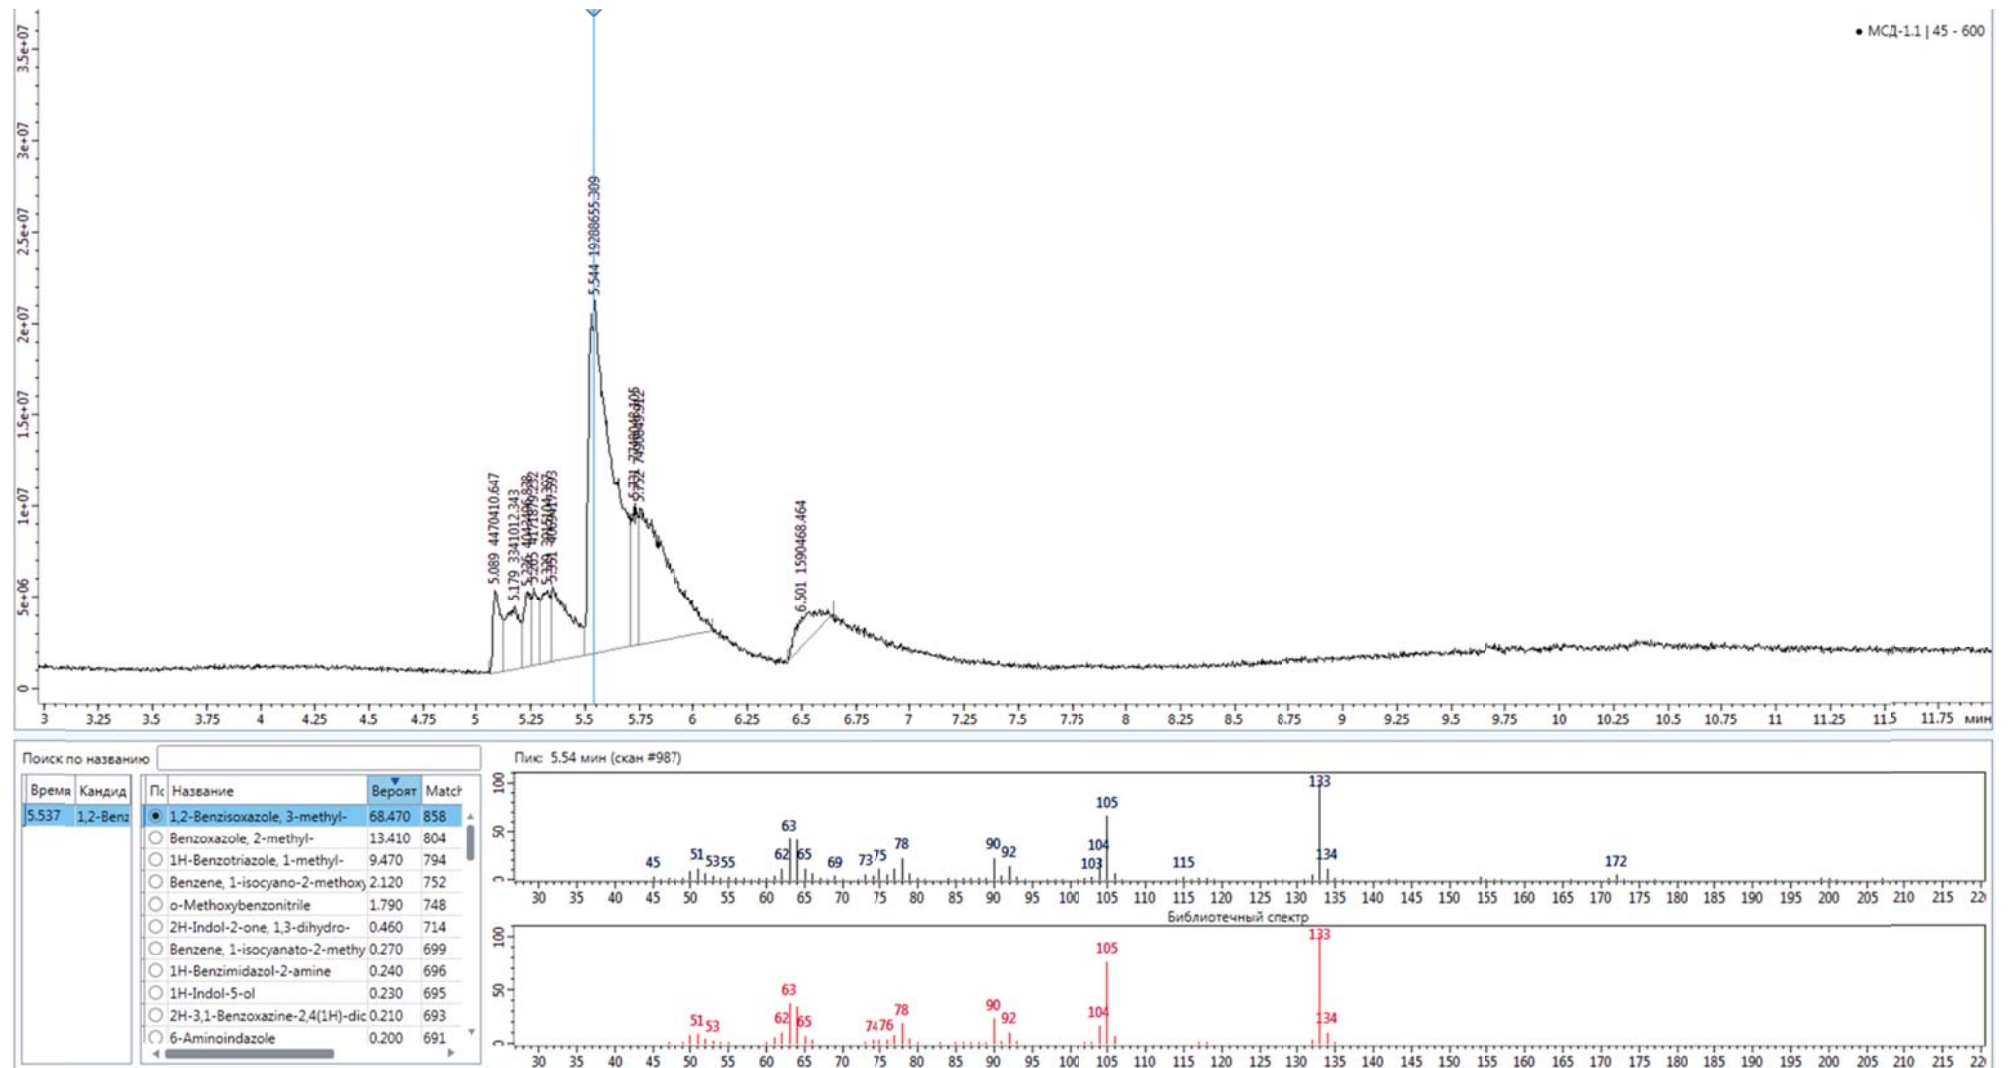

Methyl 3-methylbenzo[d]isoxazole-4-carboxylate 15g

$^1\text{H}$  NMR (300 MHz,  $\text{CDCl}_3$ )

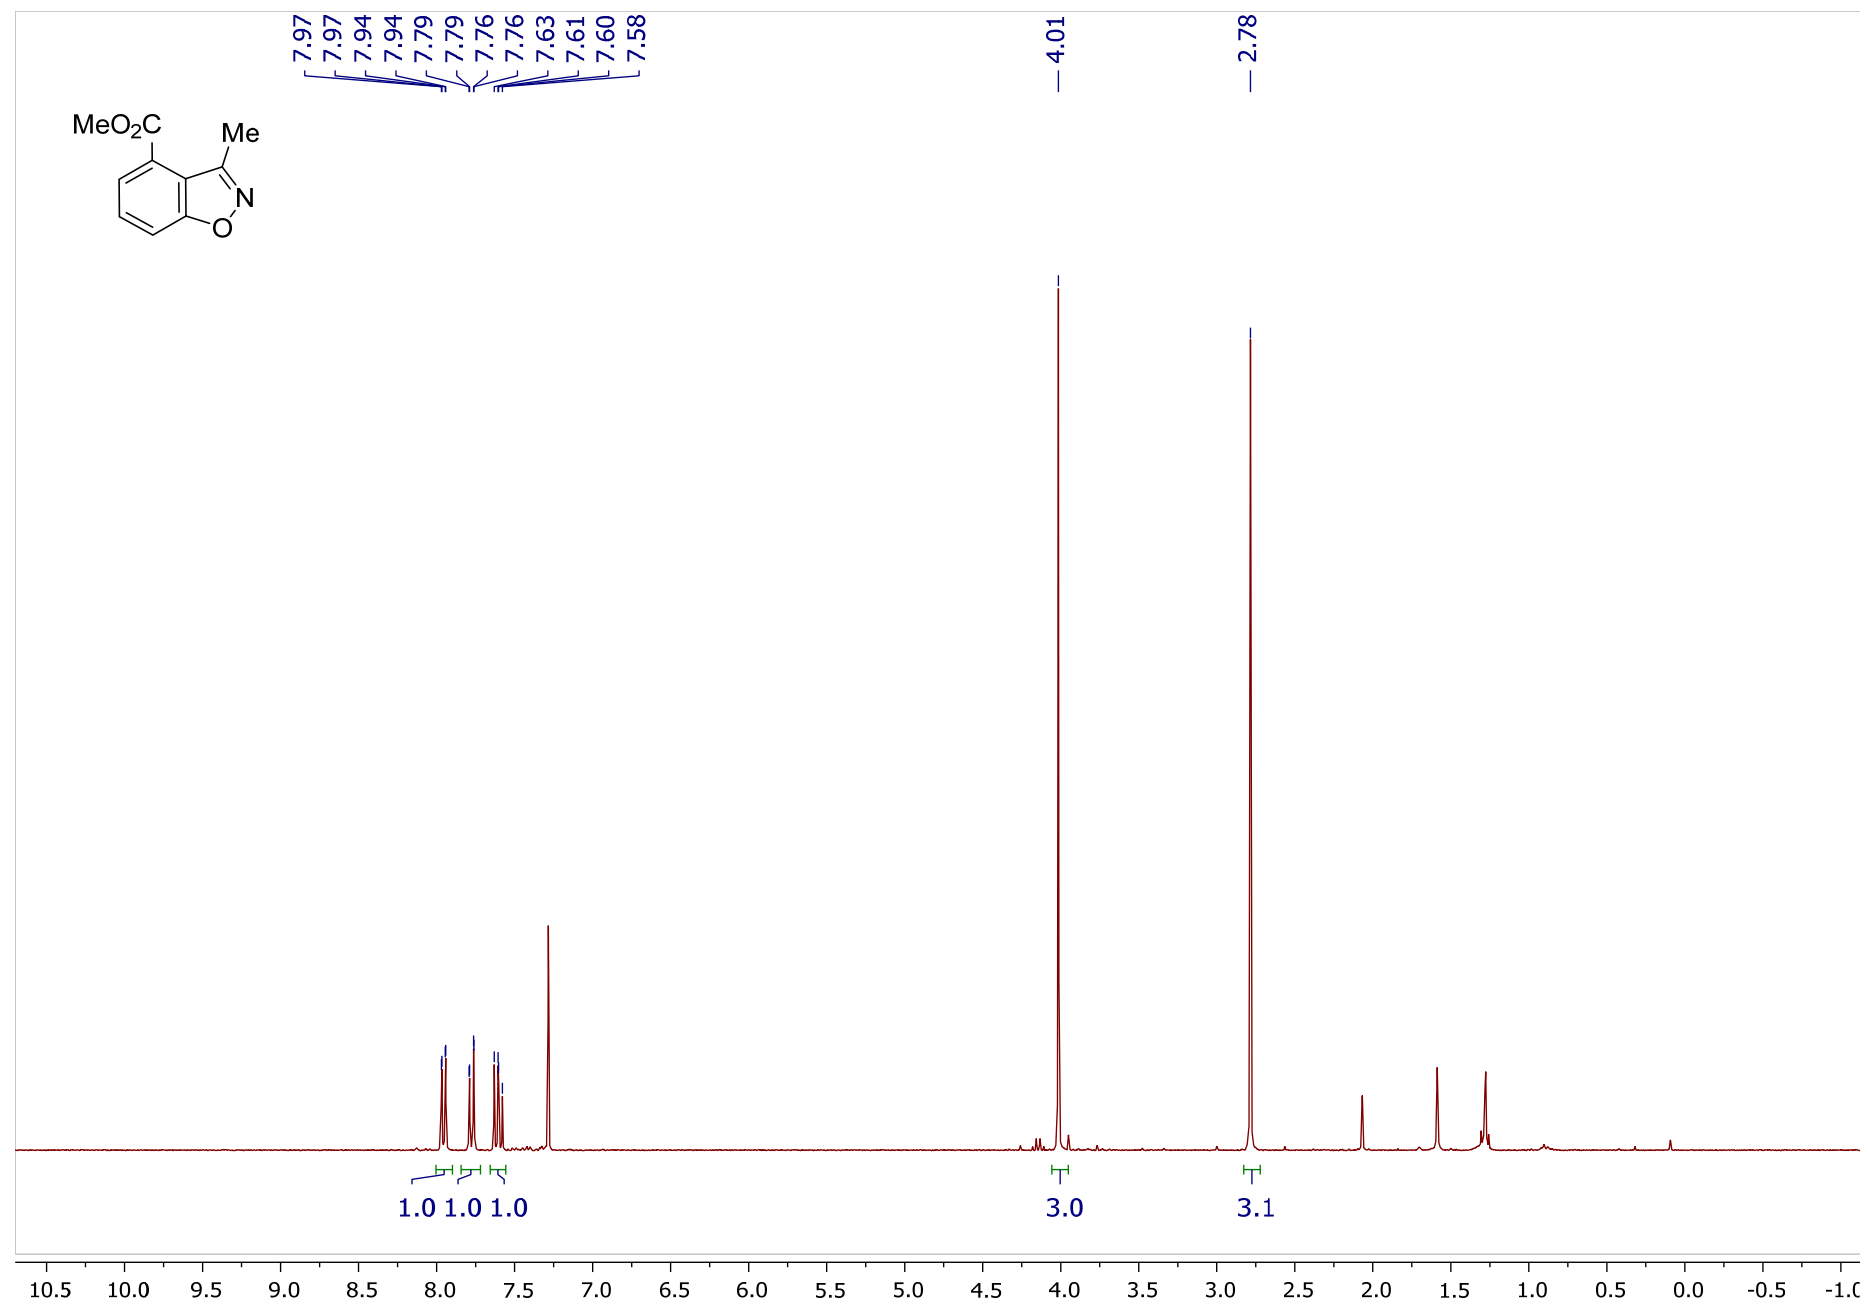

<sup>13</sup>C NMR (75 MHz, CDCl<sub>3</sub>)

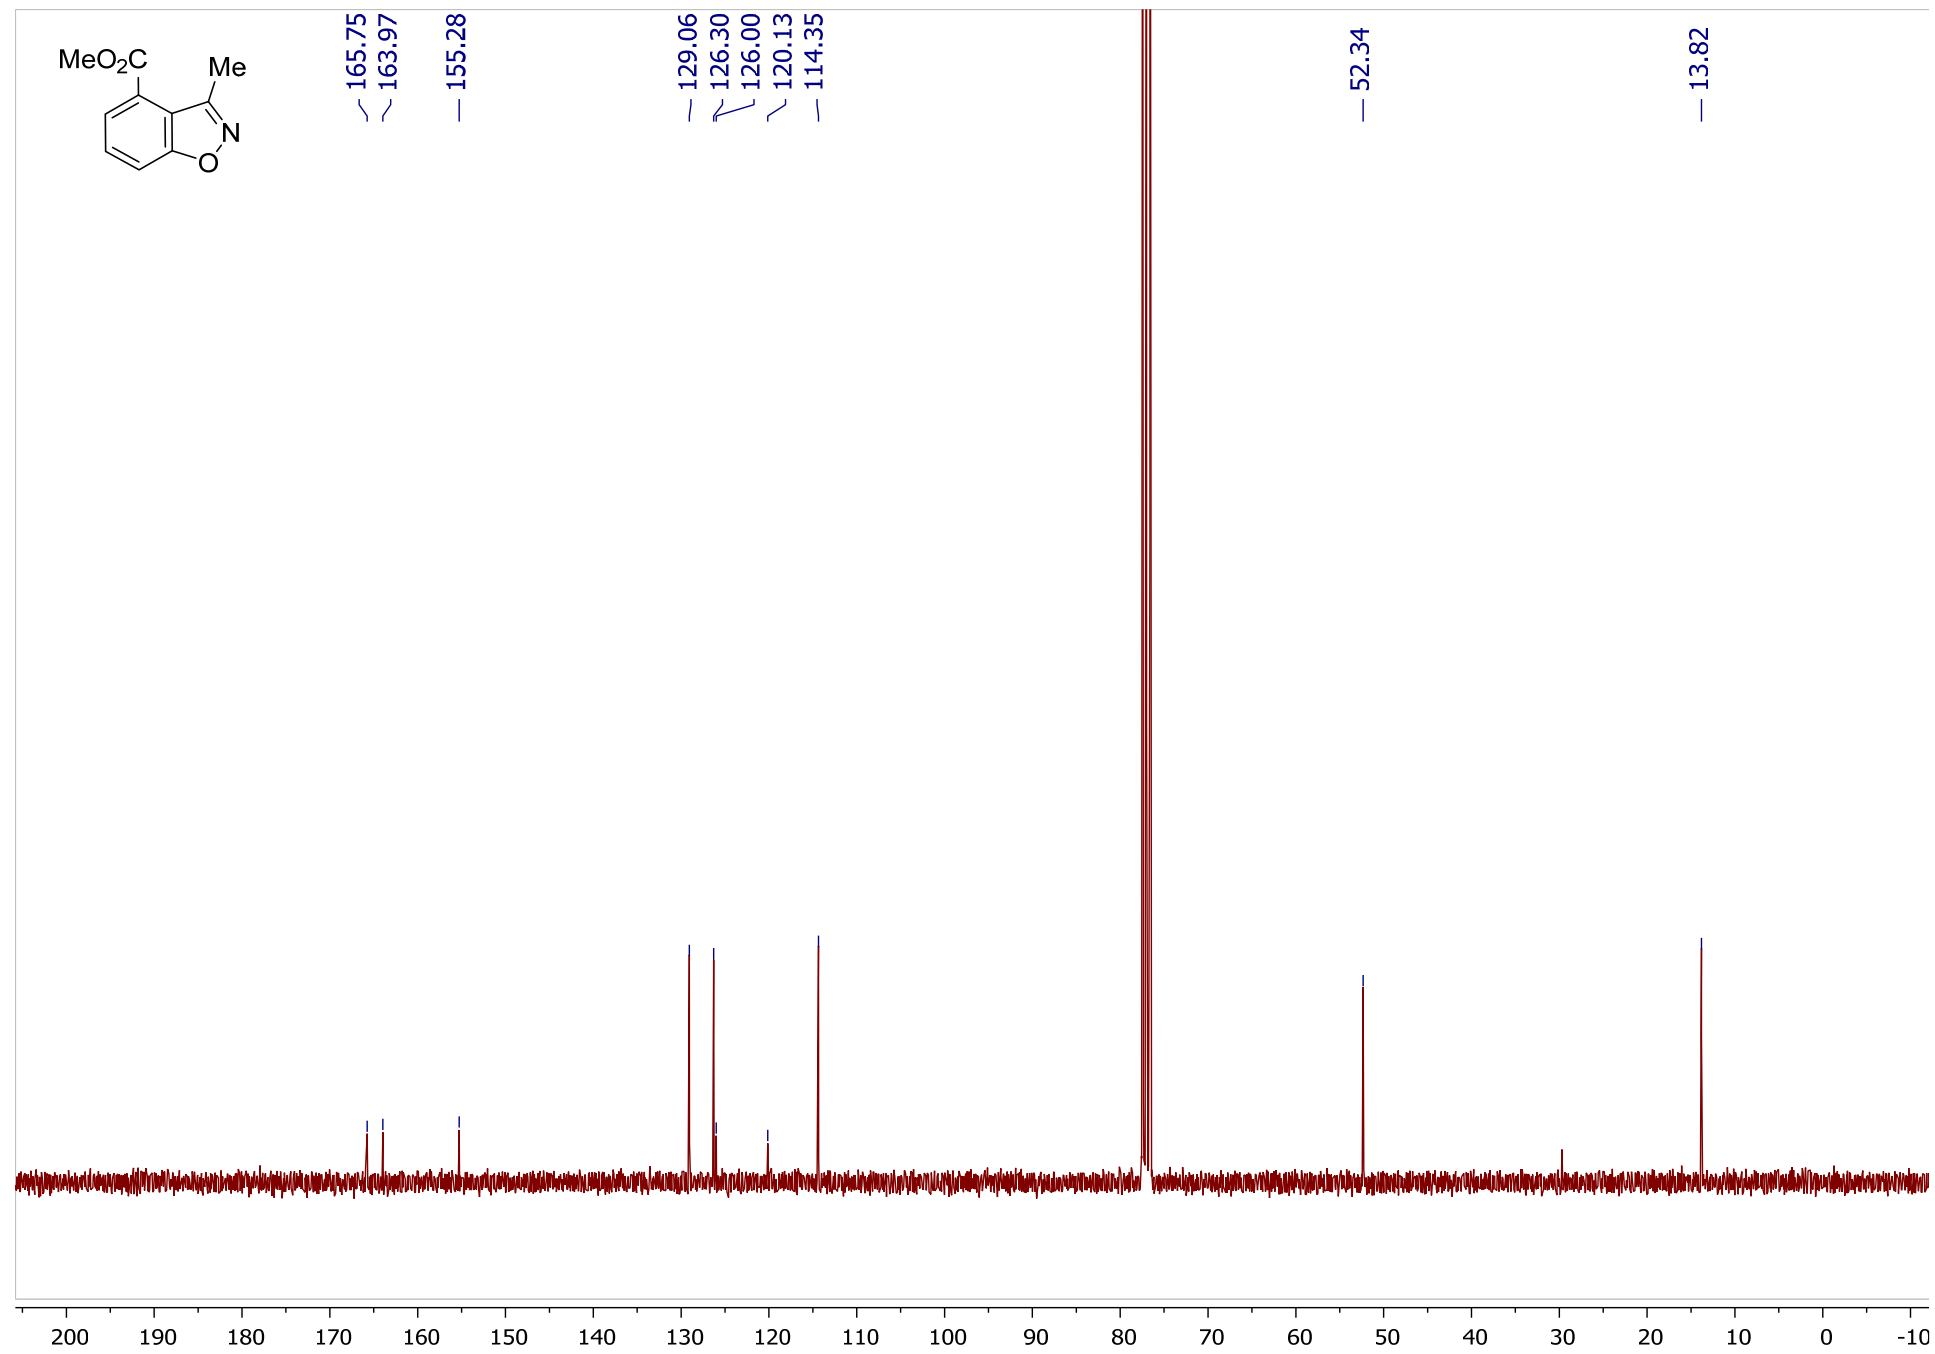



$^1\text{H}$ - $^{13}\text{C}$  HMBC

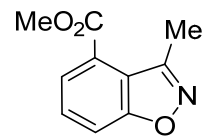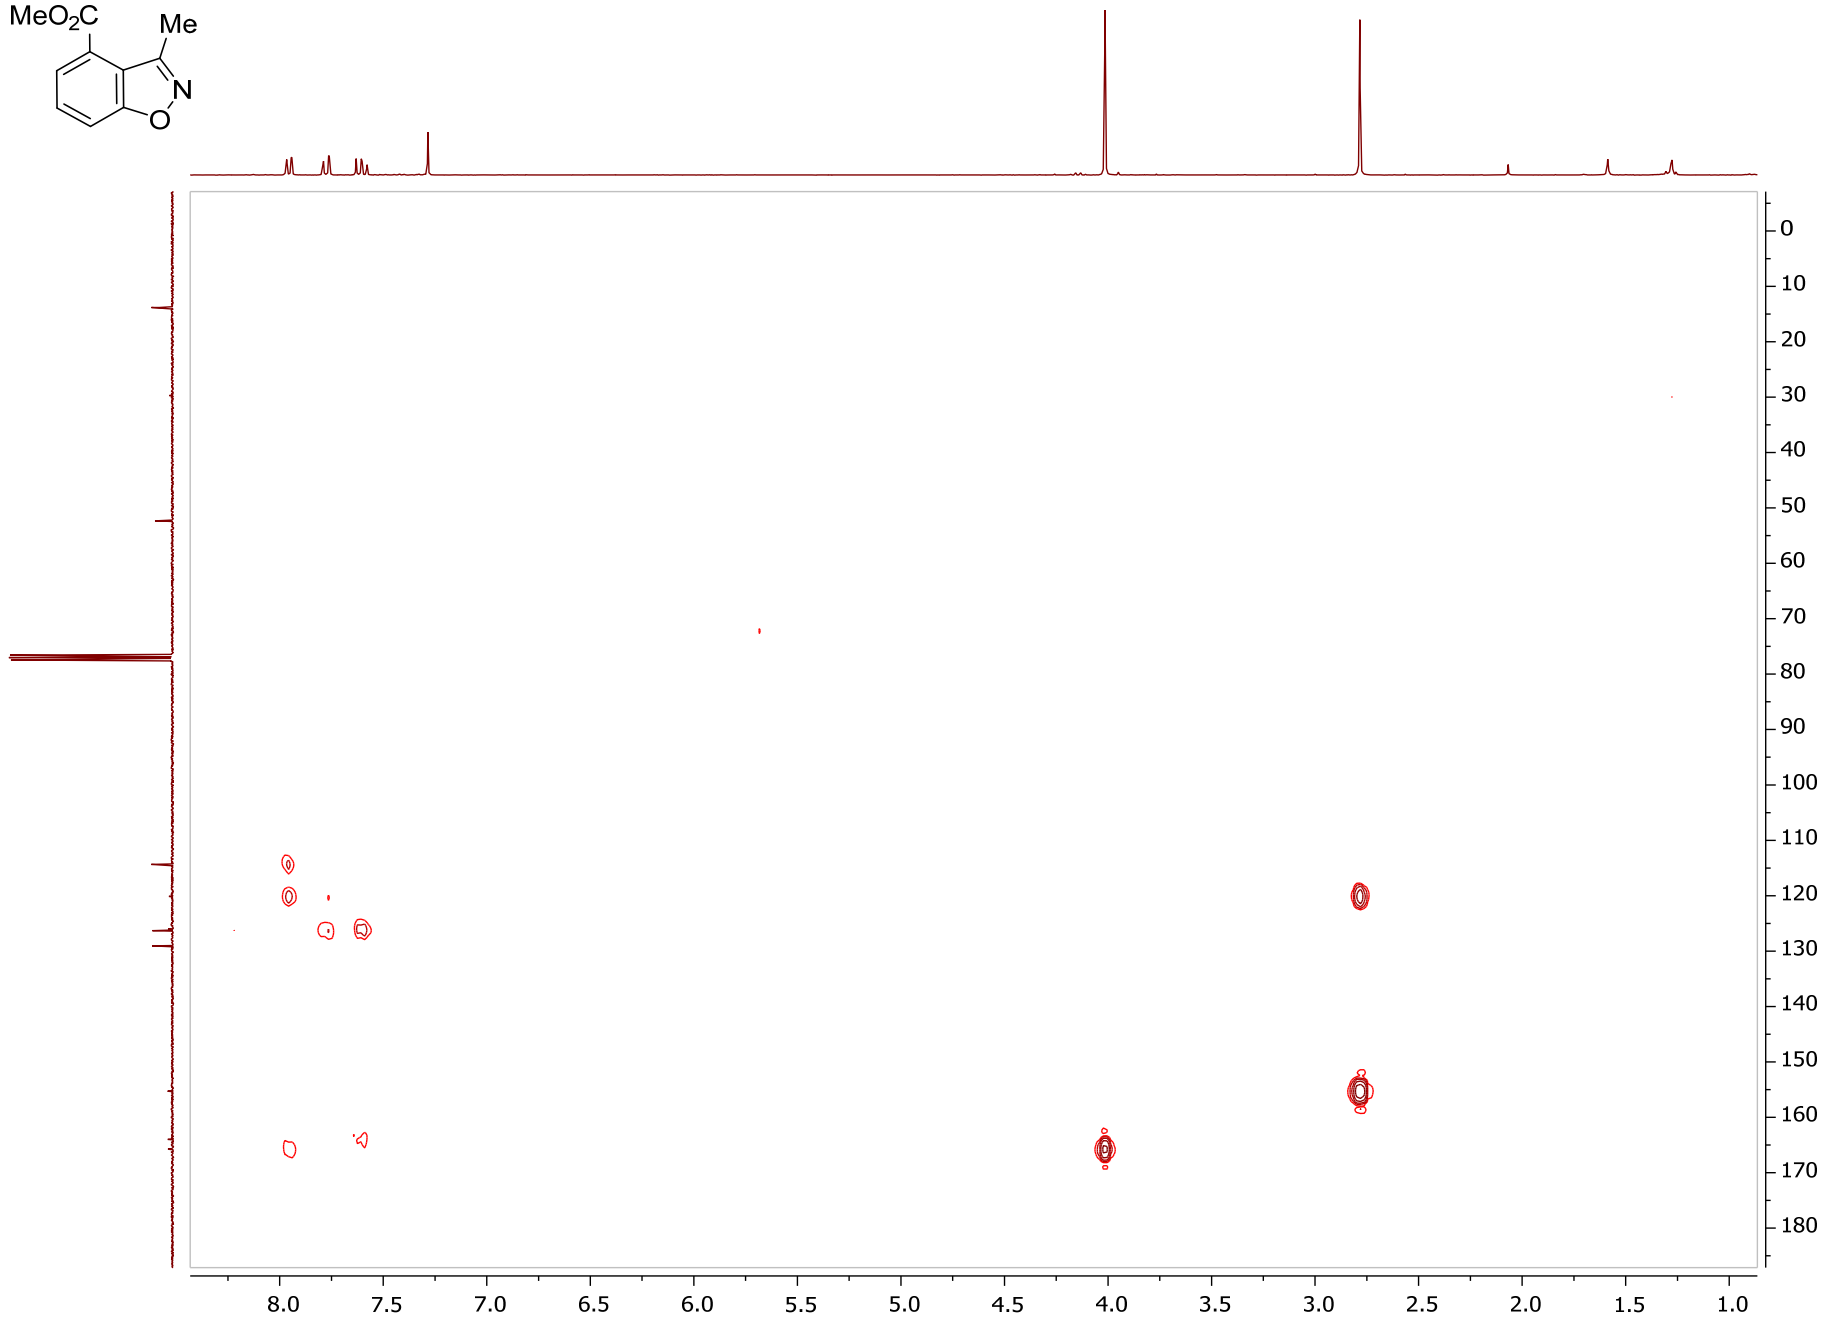

# Diethyl 2-hydroxy-2-(methoxy(4-methoxyphenyl)methyl)malonate 14

$^1\text{H}$  NMR (300 MHz,  $\text{CDCl}_3$ )

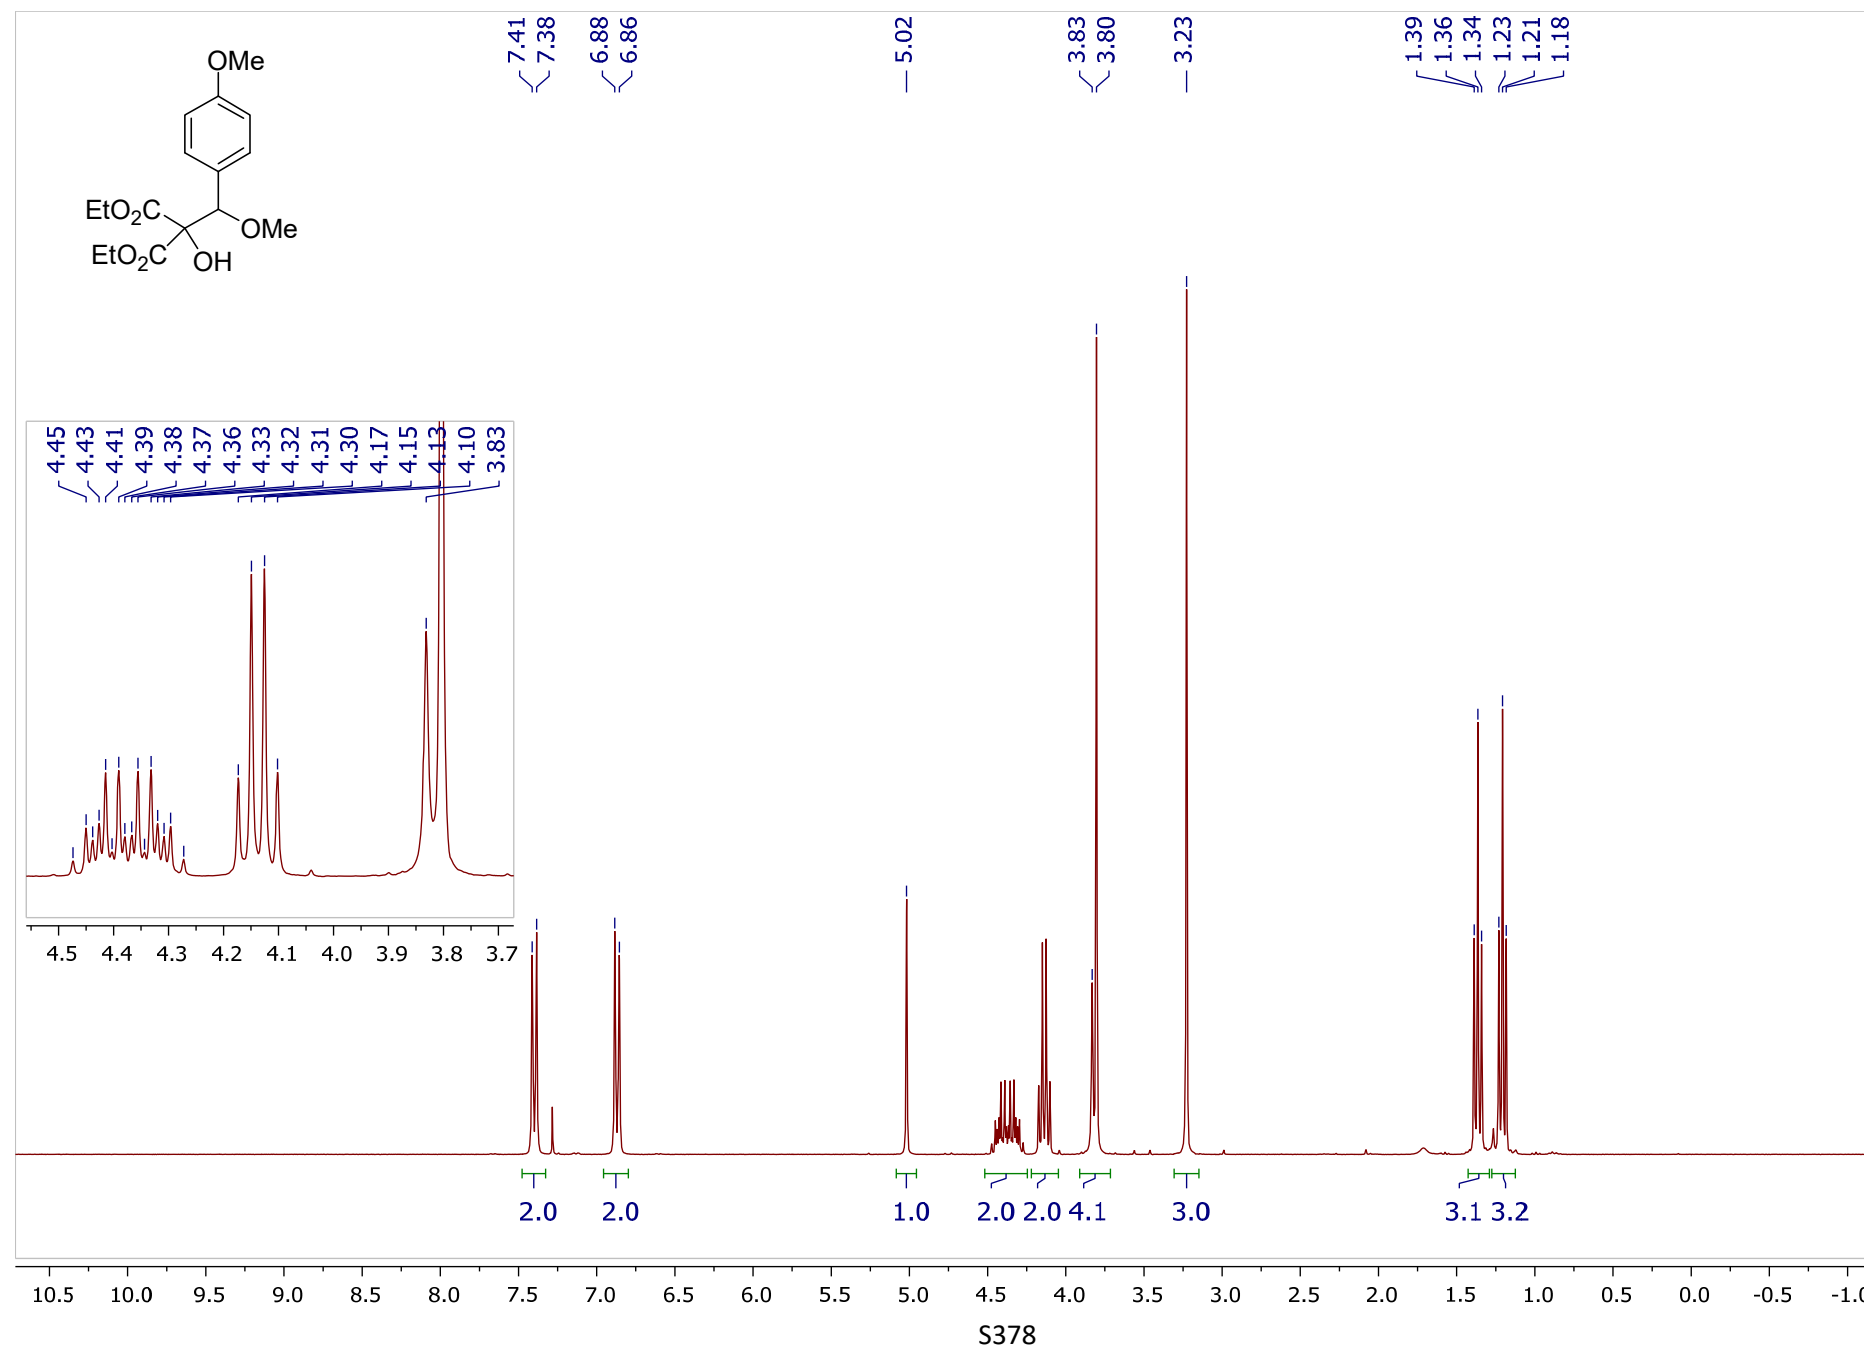

$^{13}\text{C}$  NMR (75 MHz,  $\text{CDCl}_3$ )

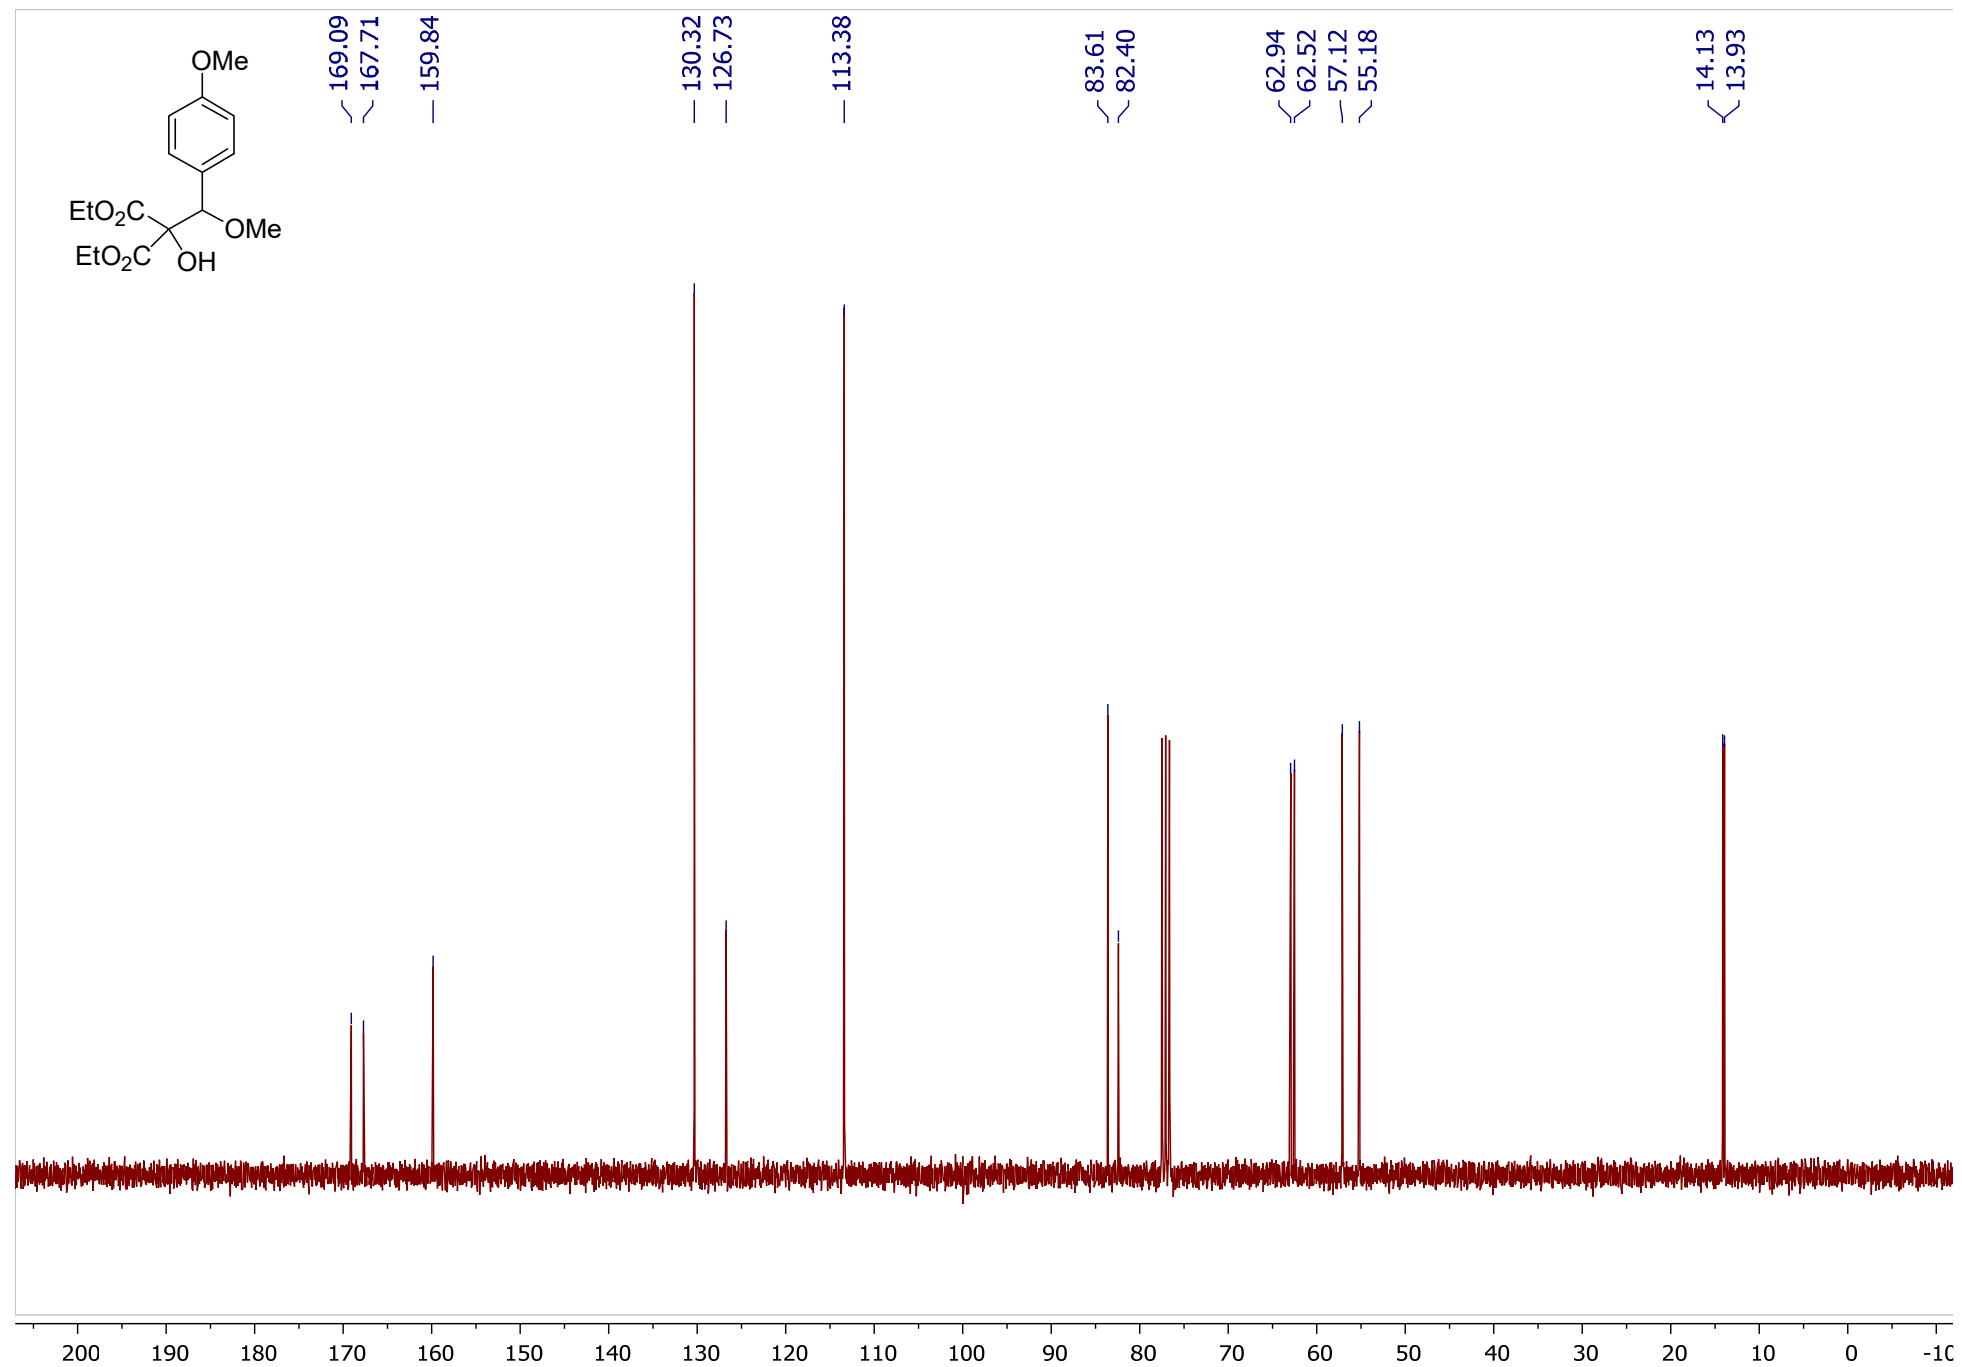

$^{13}\text{C}$  DEPT 135 (75 MHz,  $\text{CDCl}_3$ )

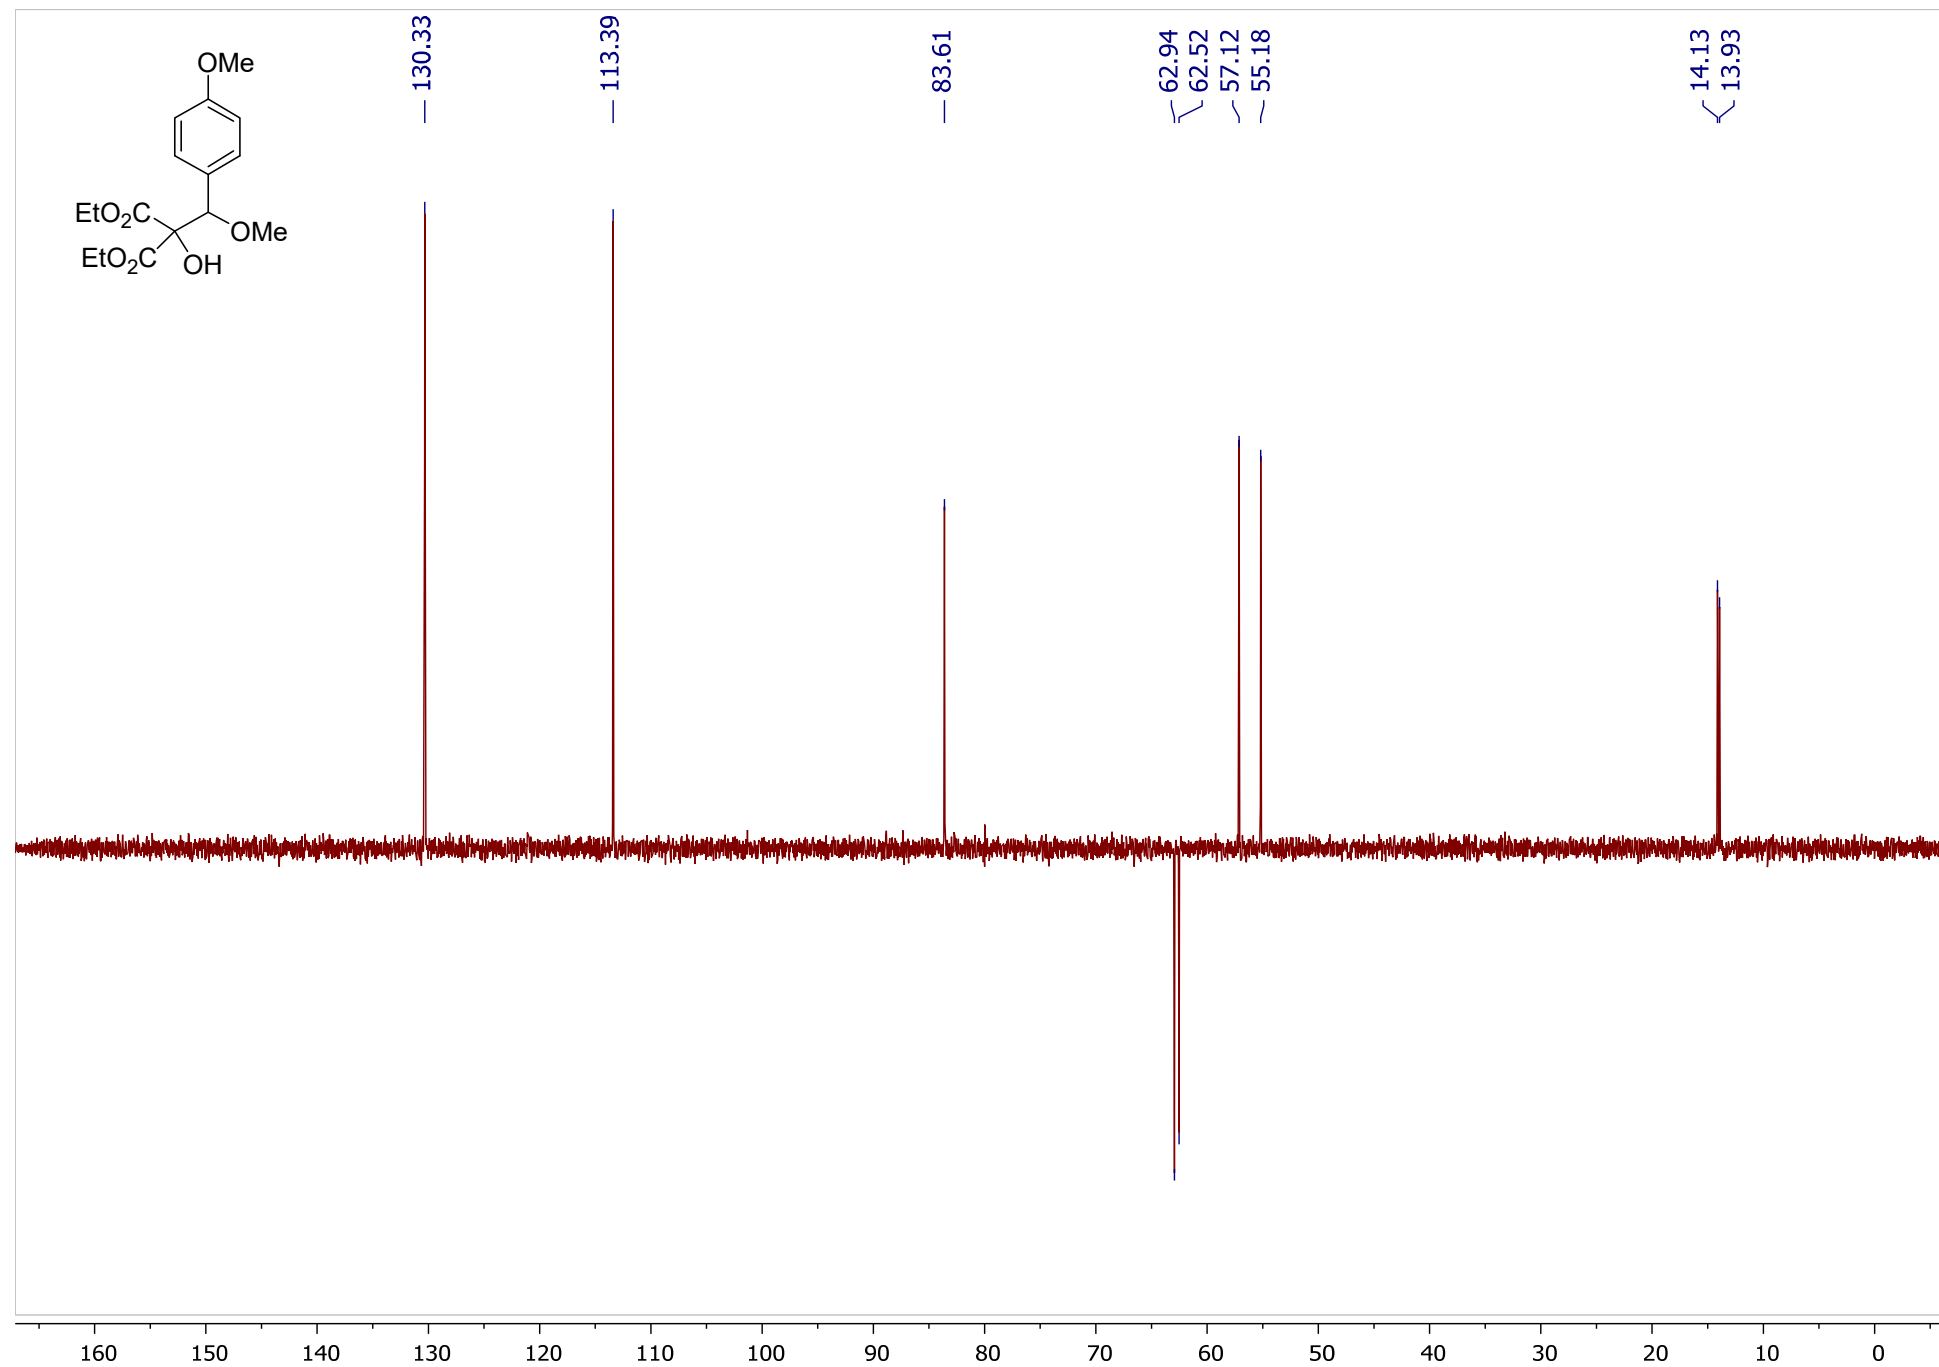

S380

$^1\text{H}$ - $^{13}\text{C}$  HSQC

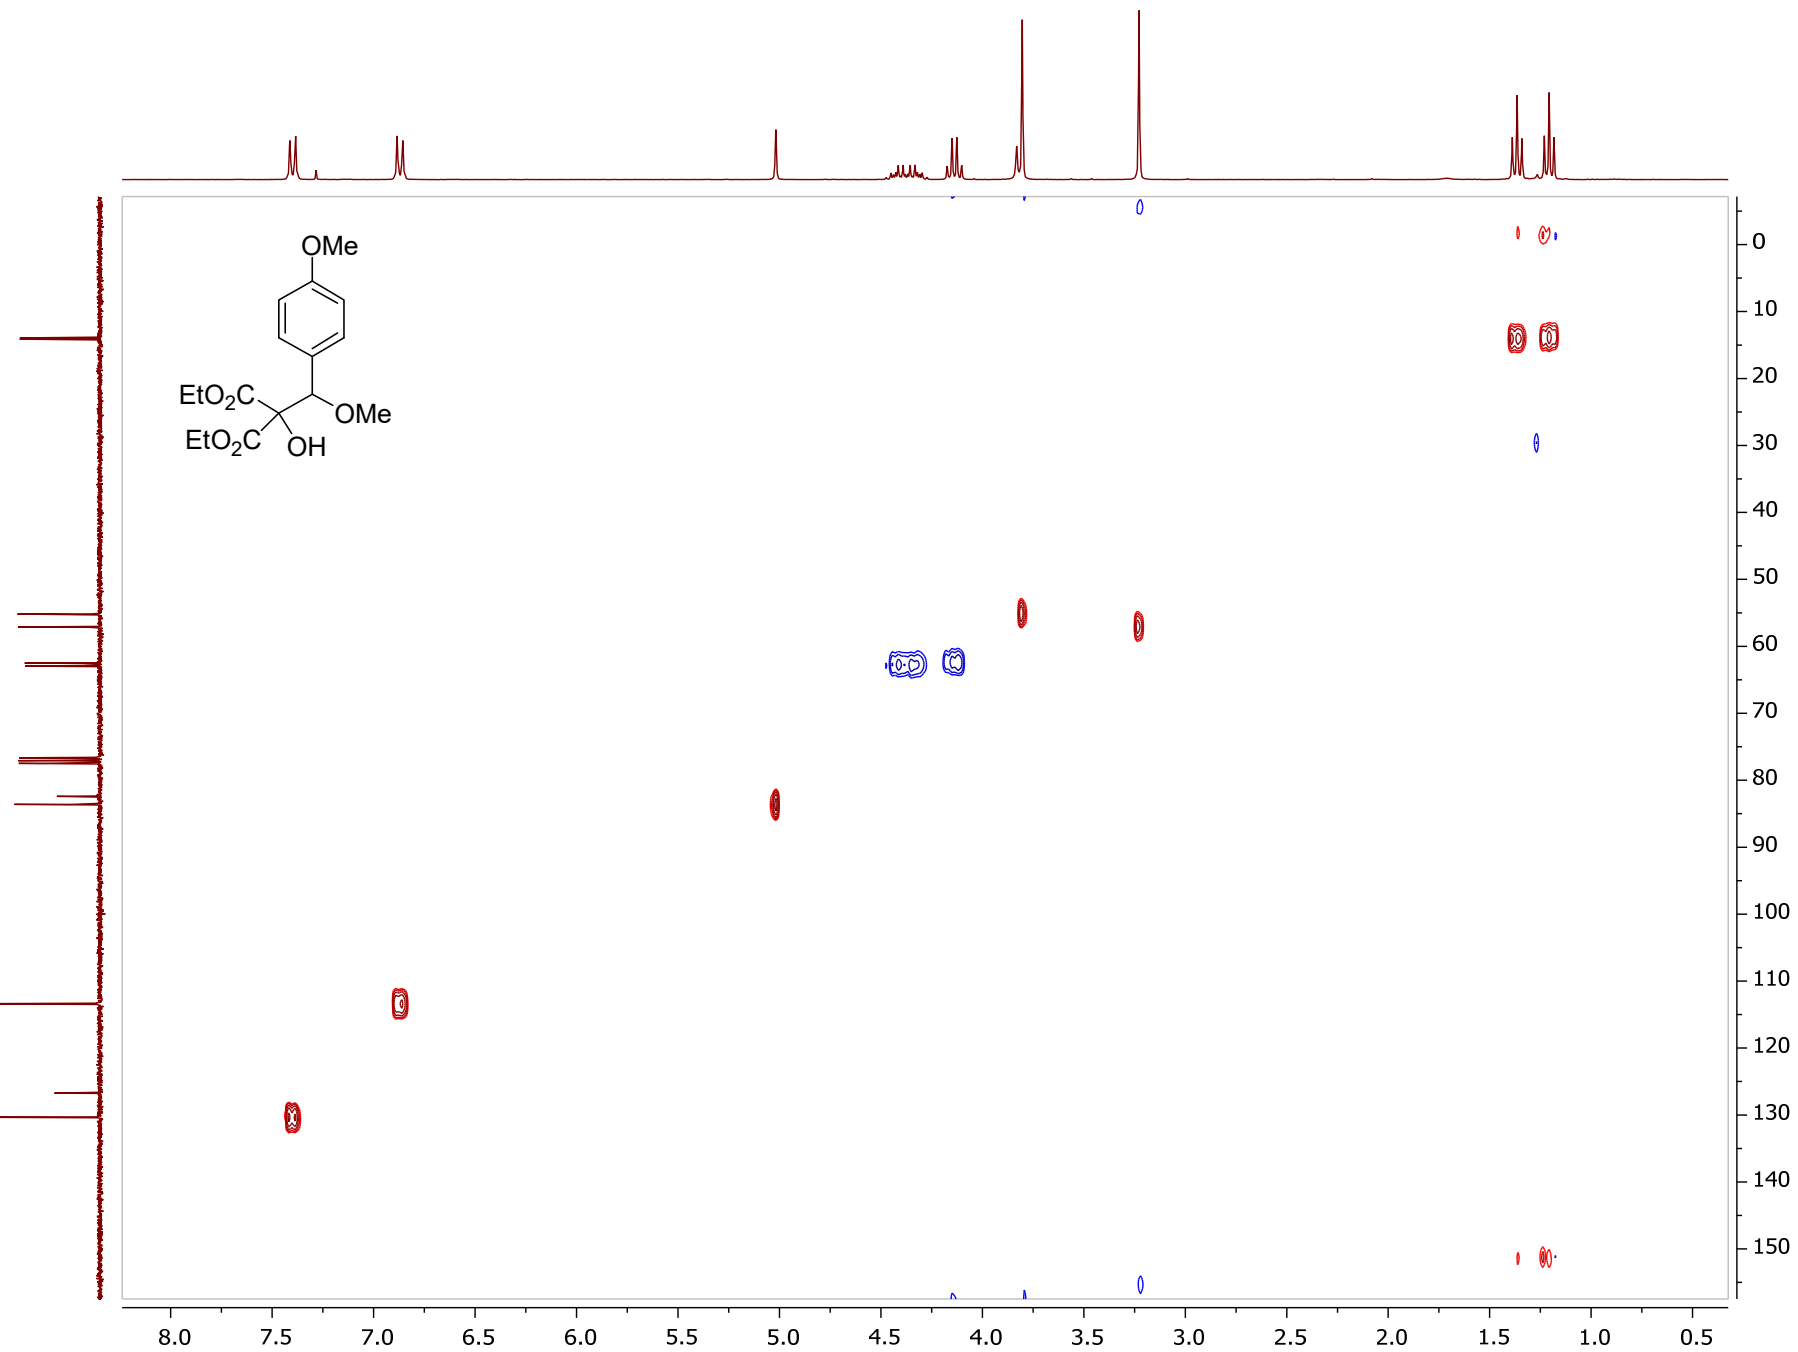

$^1\text{H}$ - $^{13}\text{C}$  HMBC

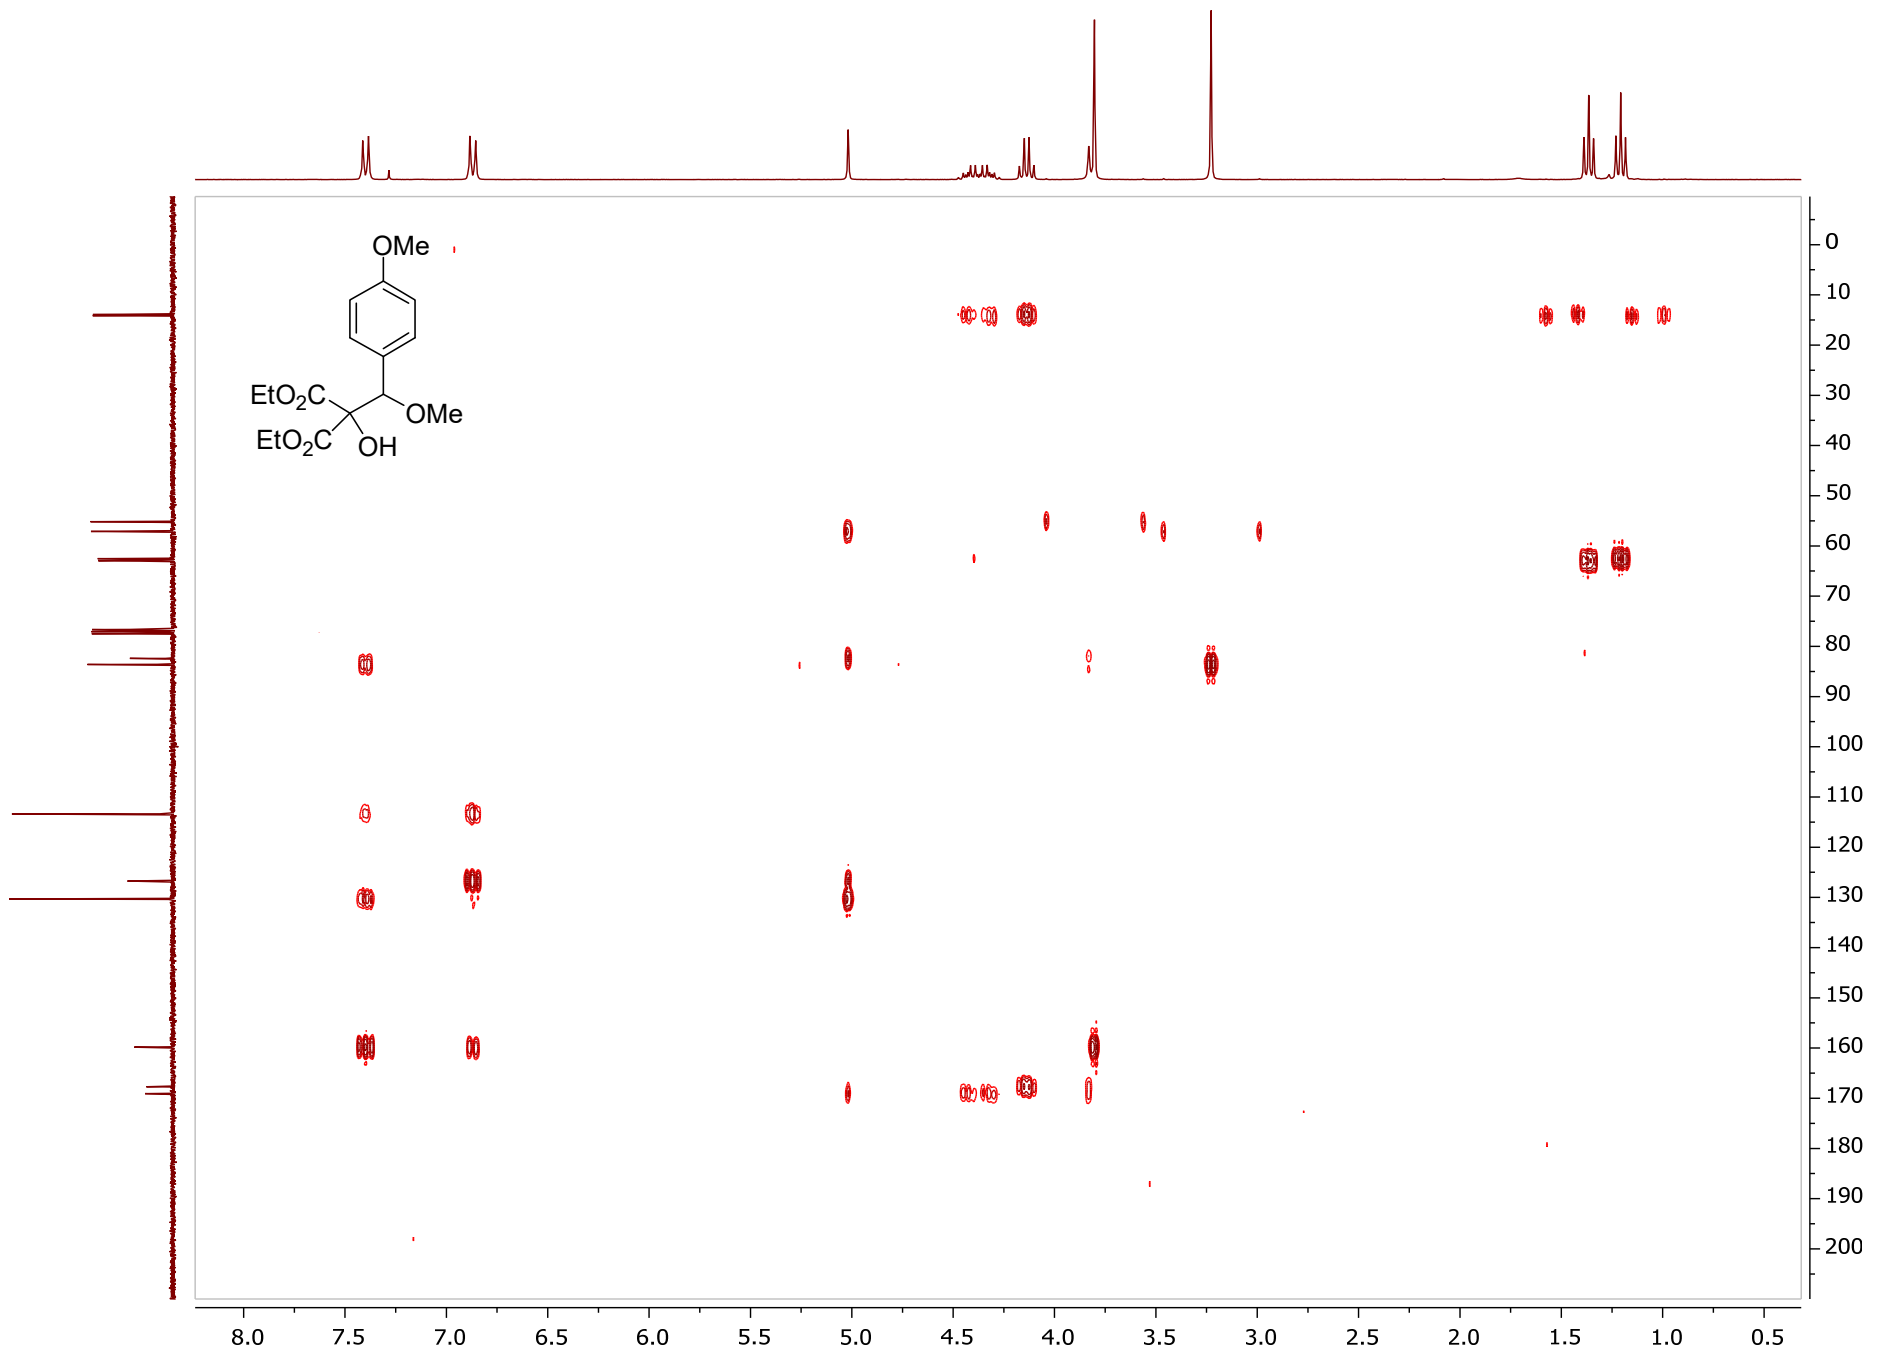

# 4-Methoxy-4-(4-methoxyphenyl)-2-methylbutan-2-ol 16

$^1\text{H}$  NMR (300 MHz,  $\text{CDCl}_3$ )

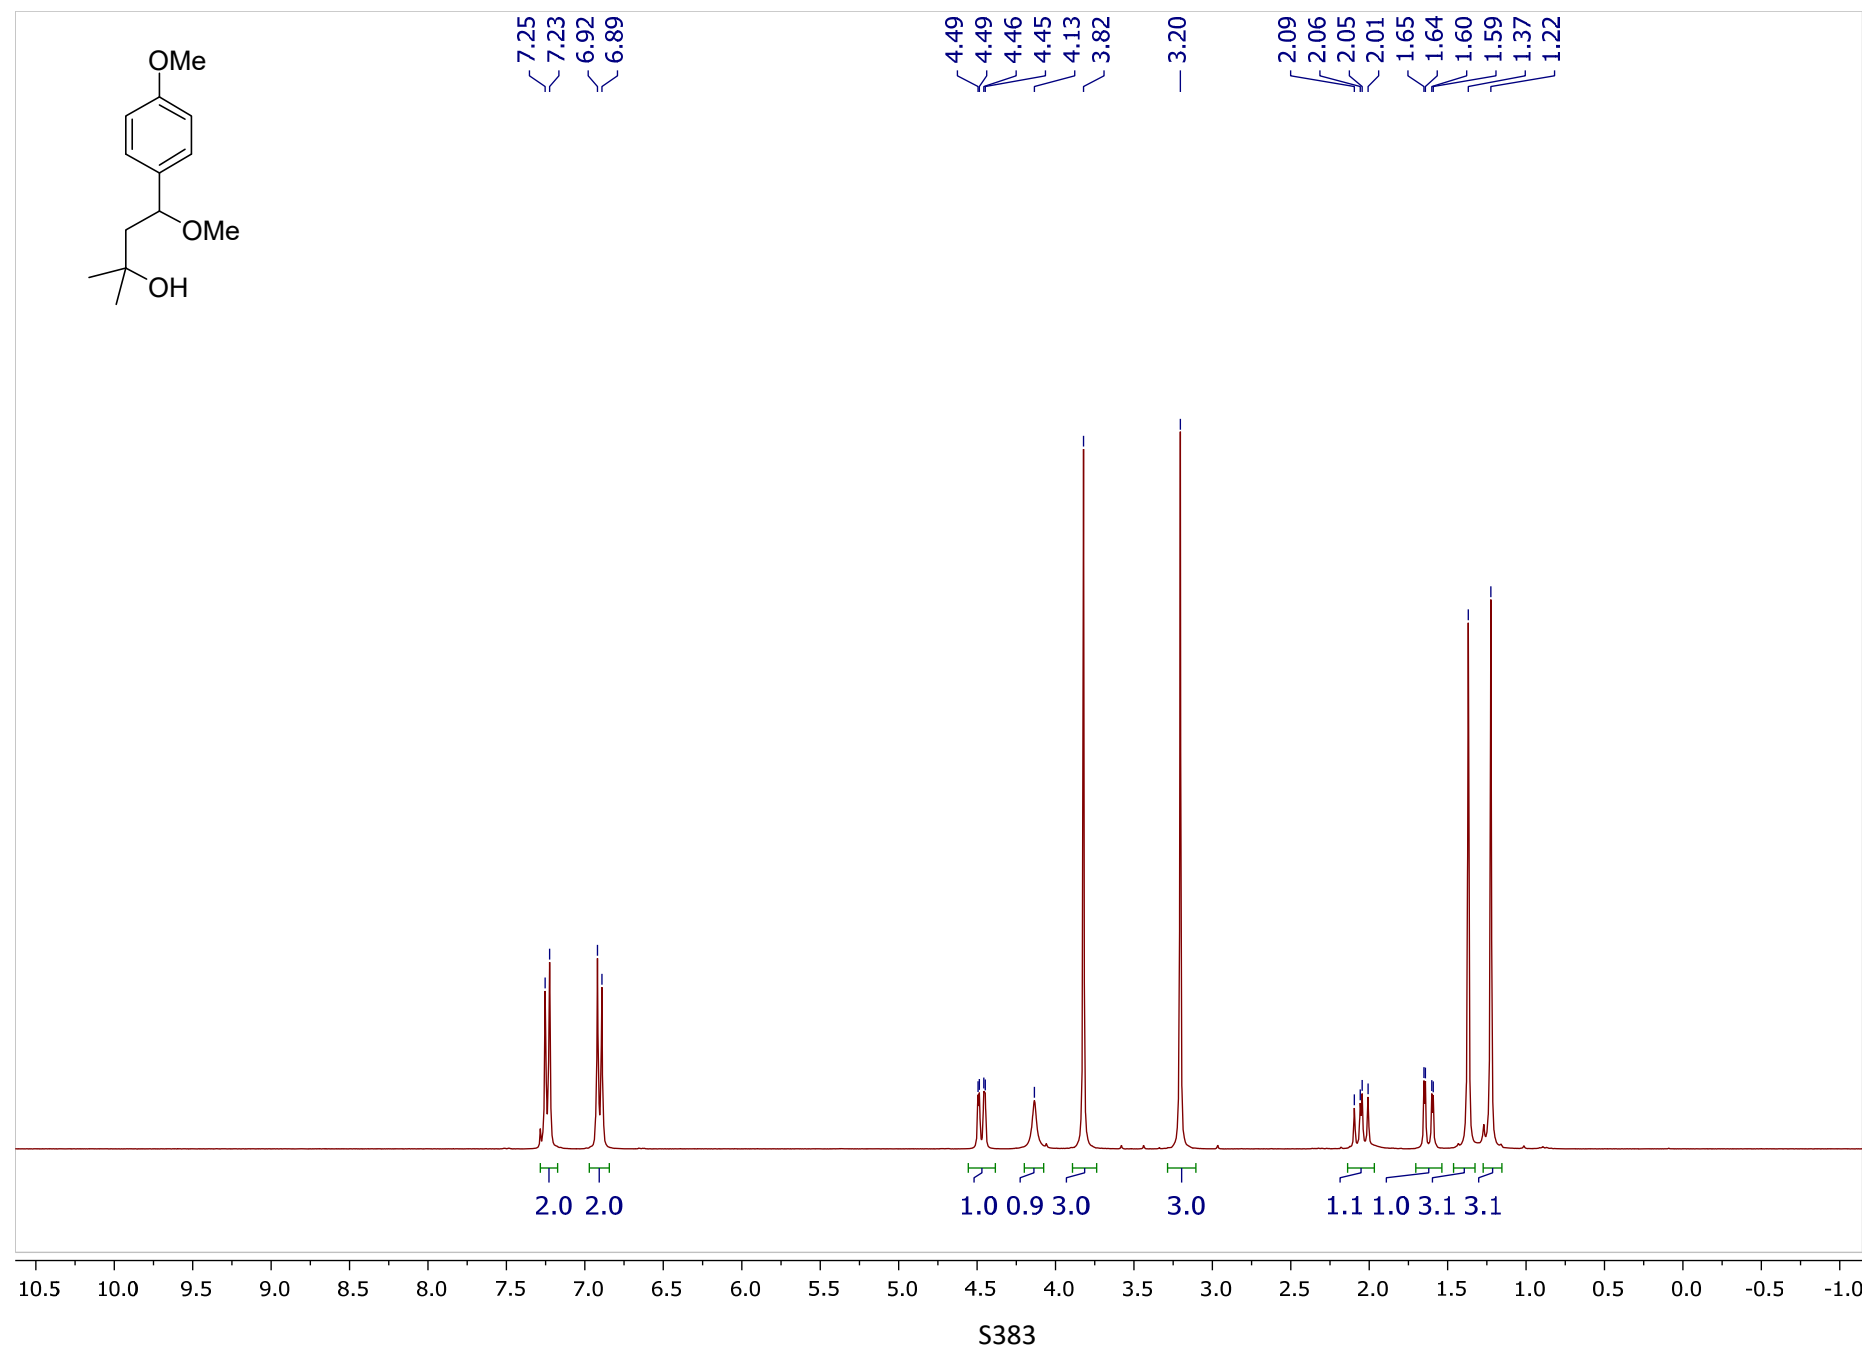

$^{13}\text{C}$  NMR (75 MHz,  $\text{CDCl}_3$ )

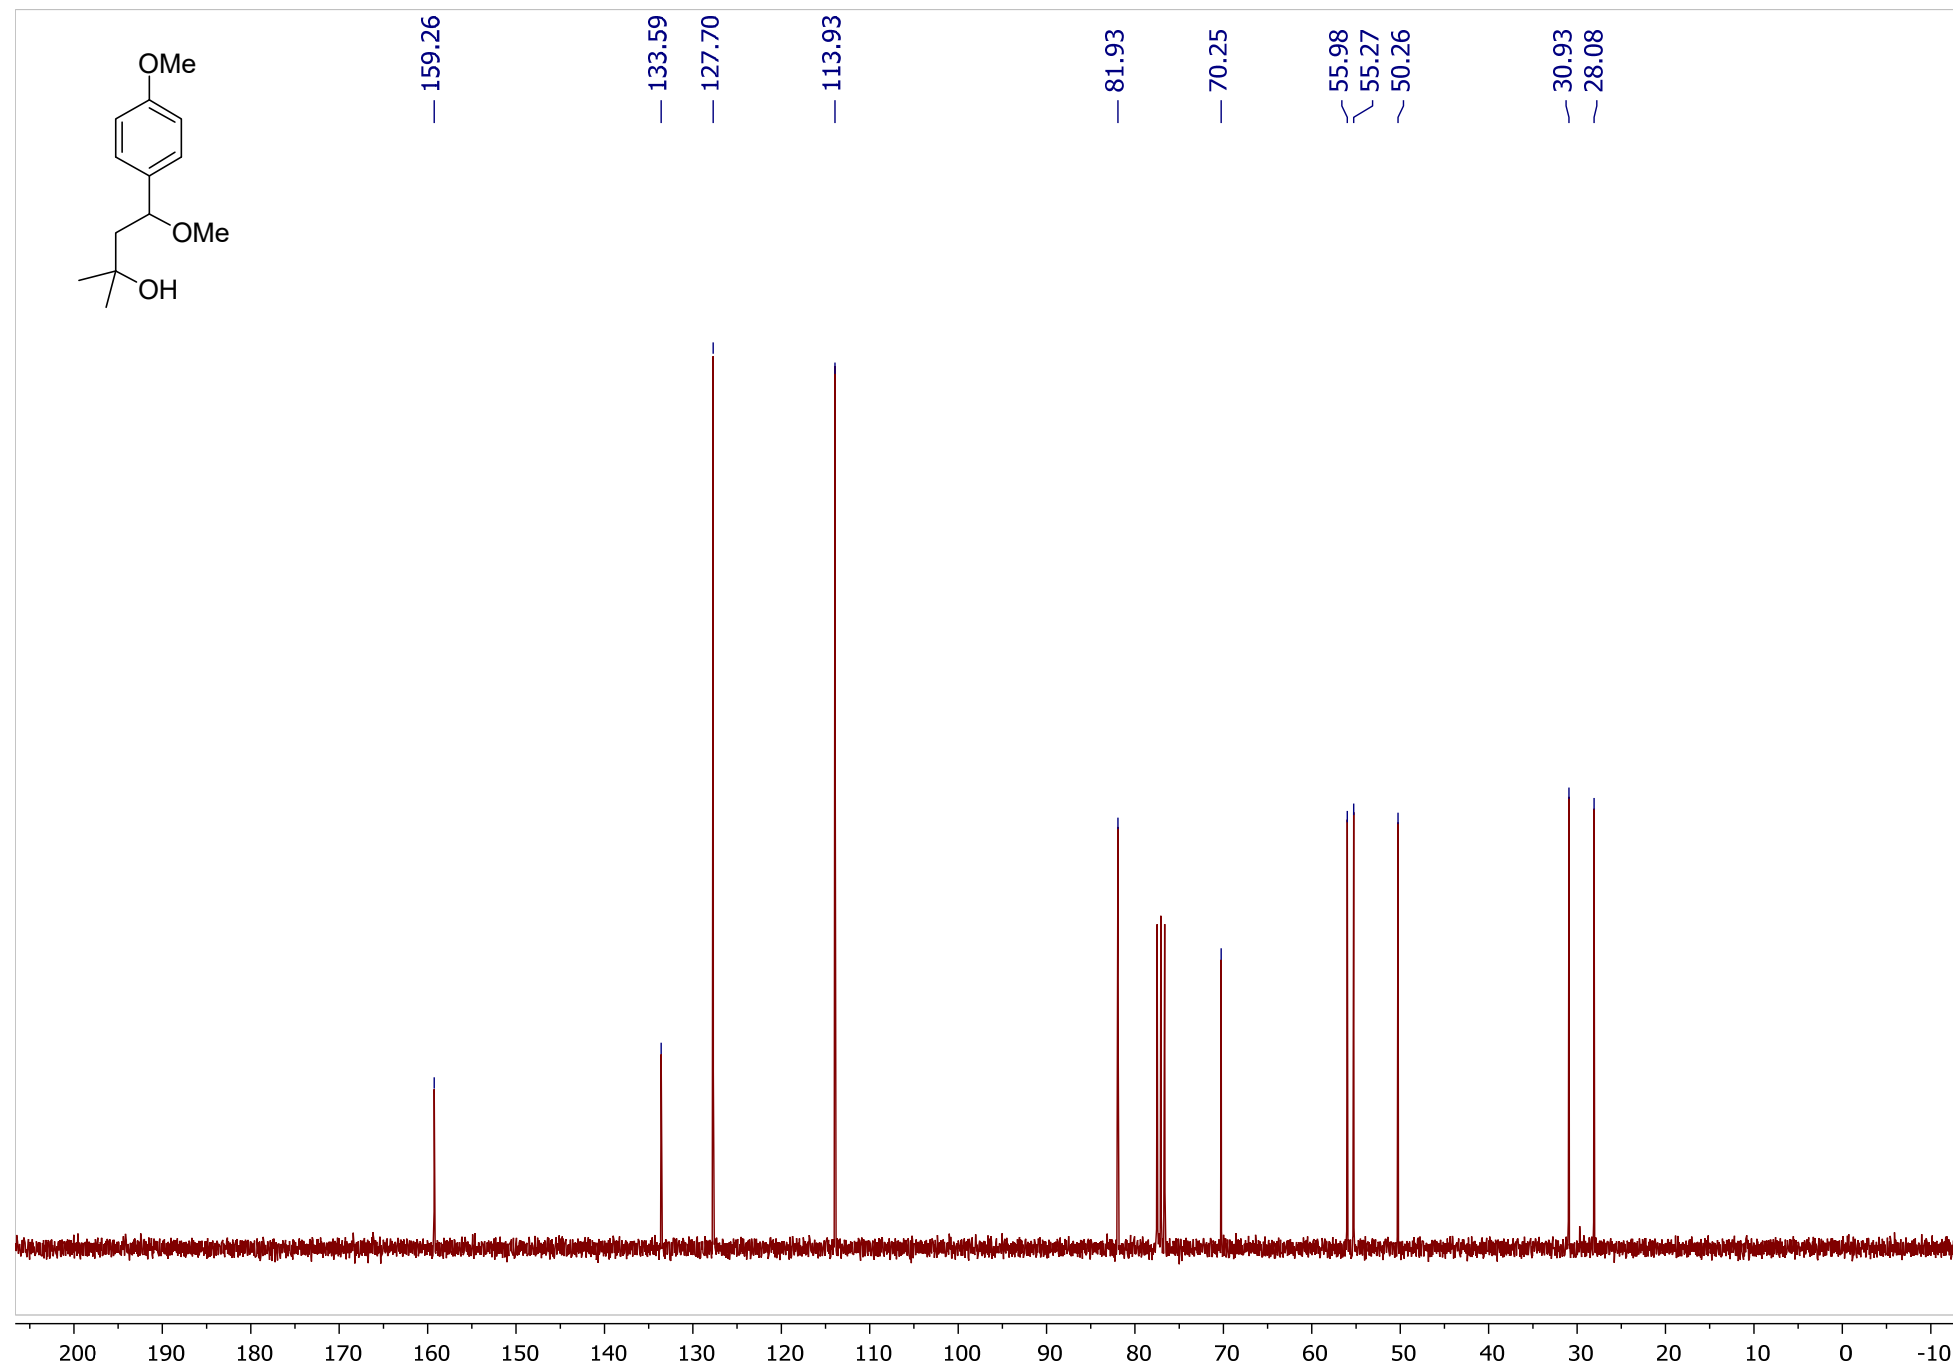



$^{13}\text{C}$  DEPT 135 (75 MHz,  $\text{CDCl}_3$ )

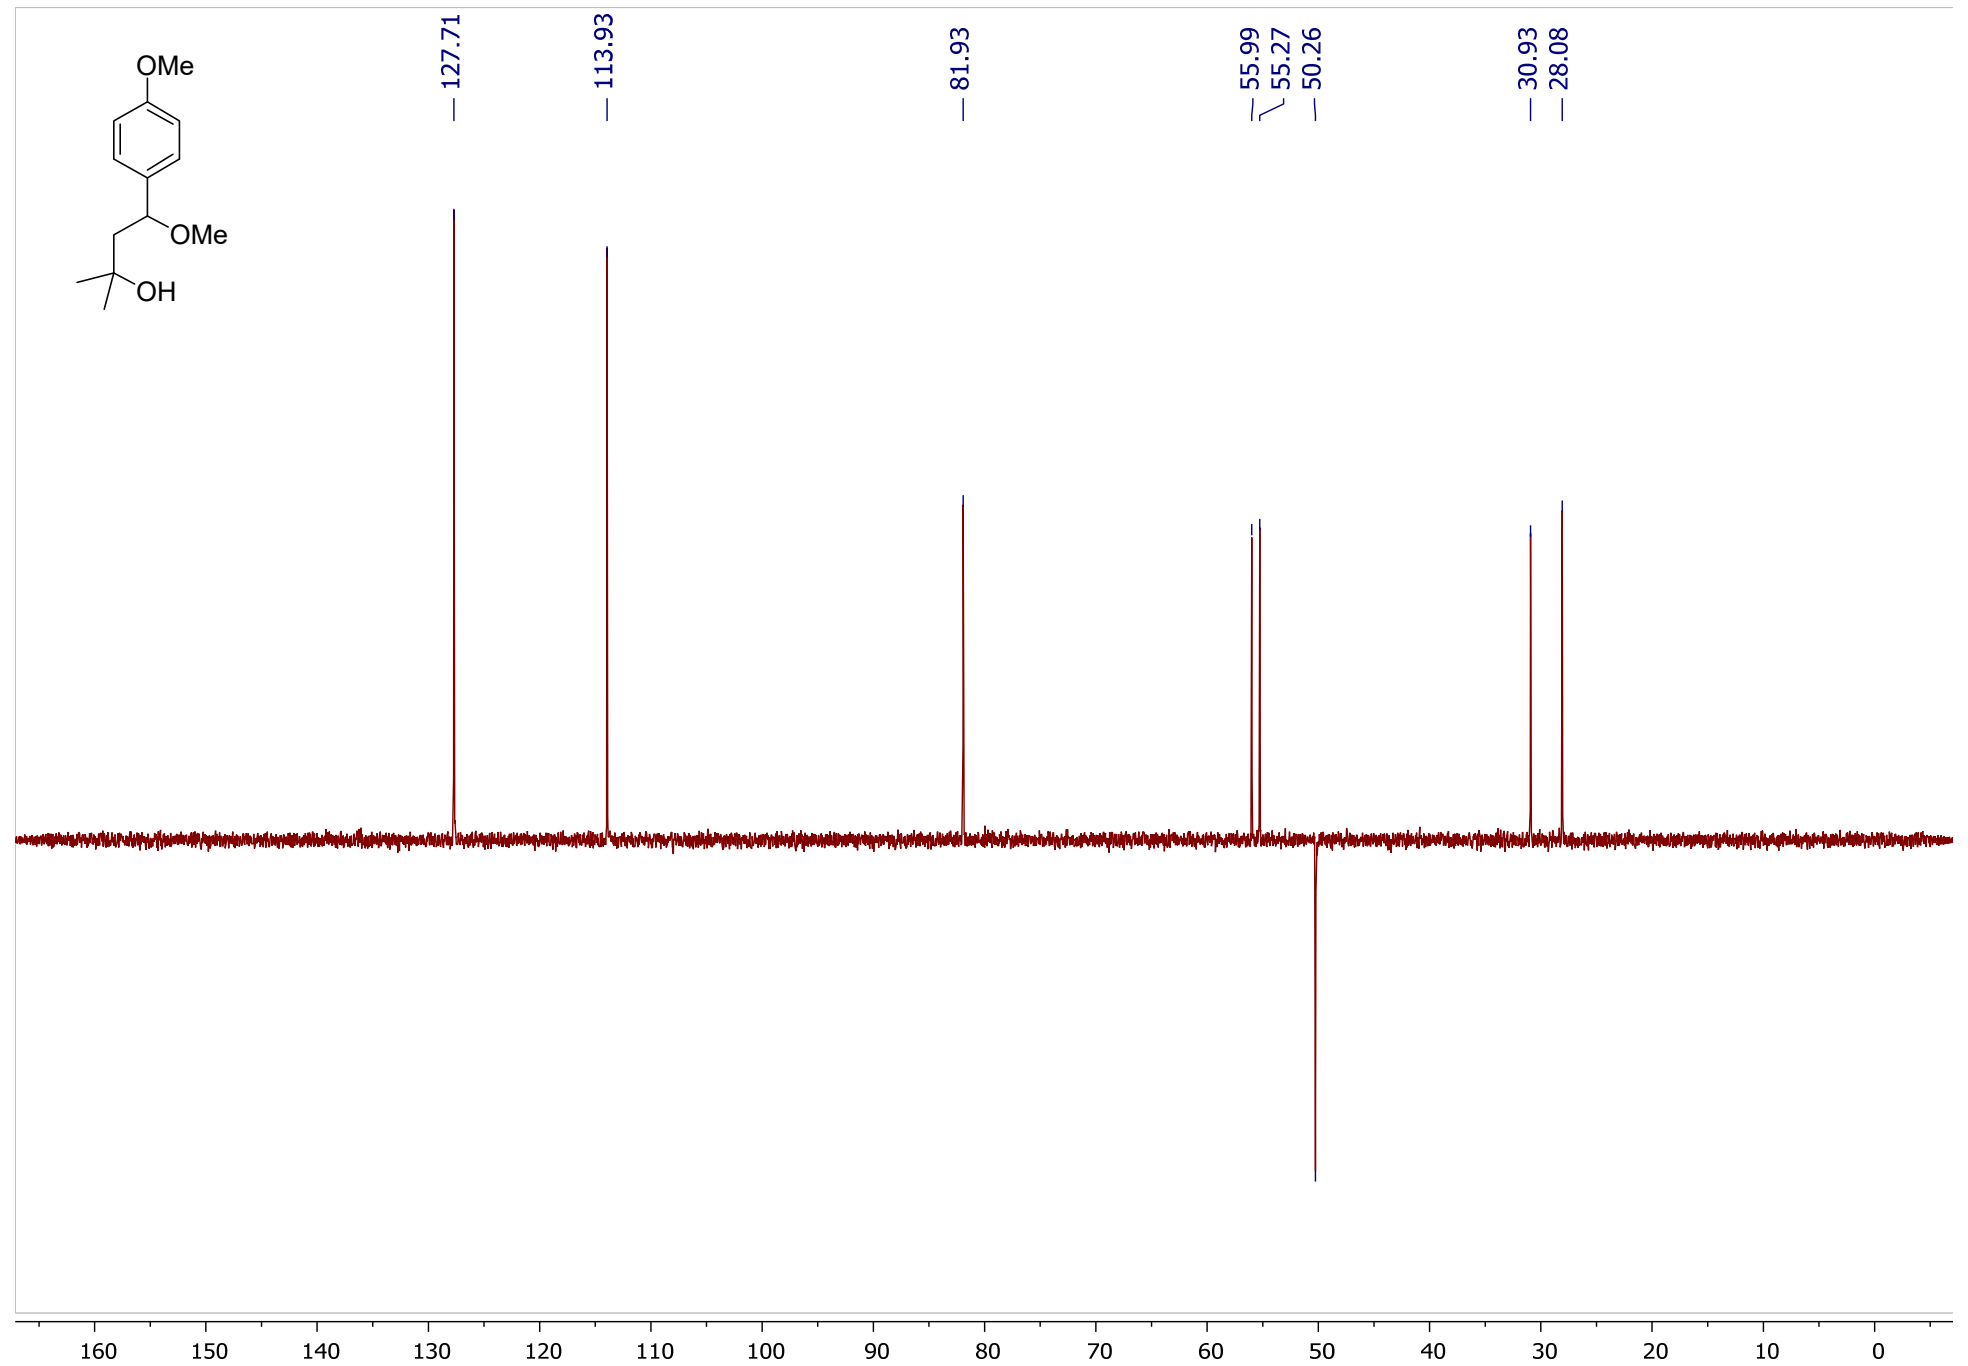

S385

$^1\text{H}-^{13}\text{C}$  HSQC

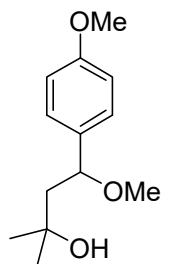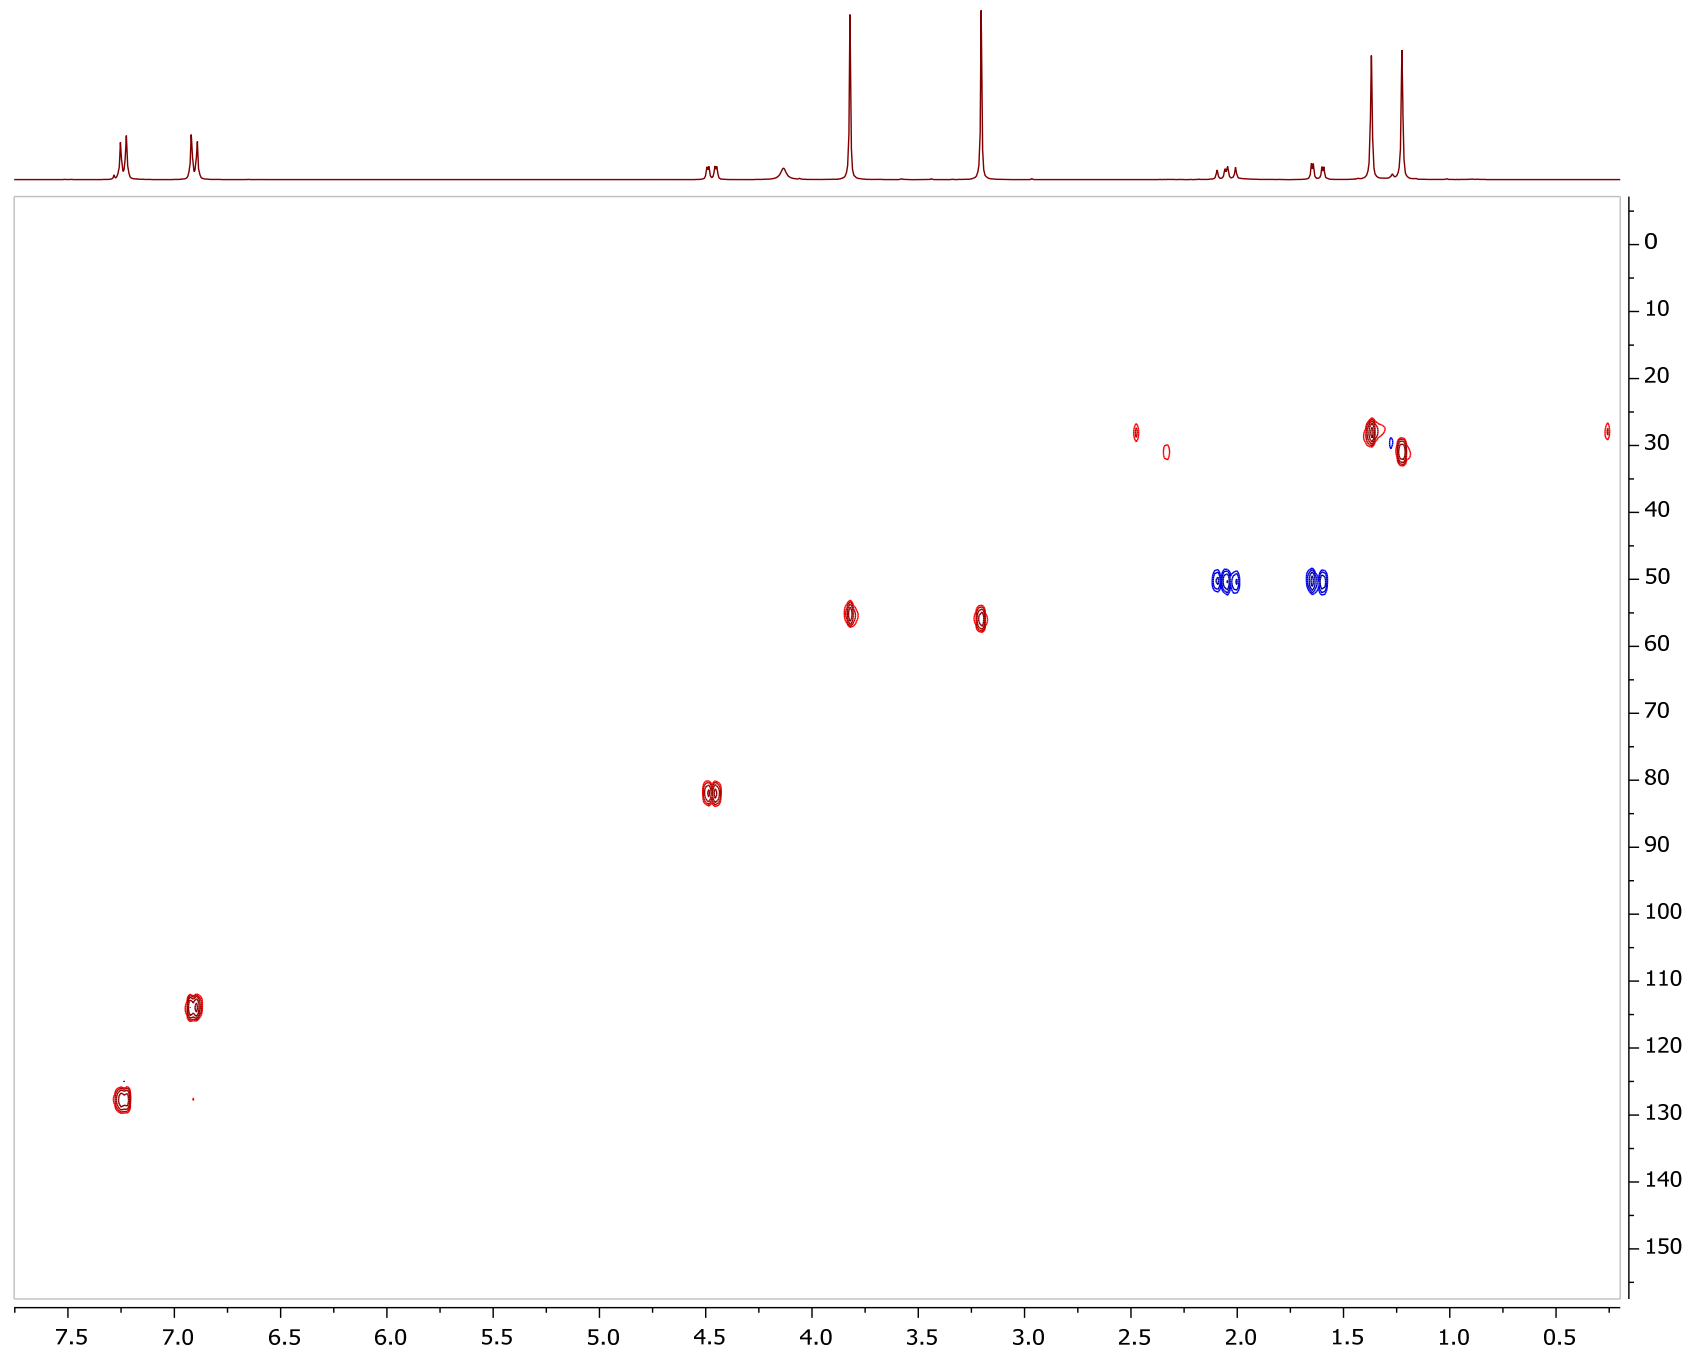

S386

$^1\text{H}$ - $^{13}\text{C}$  HMBC

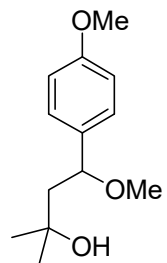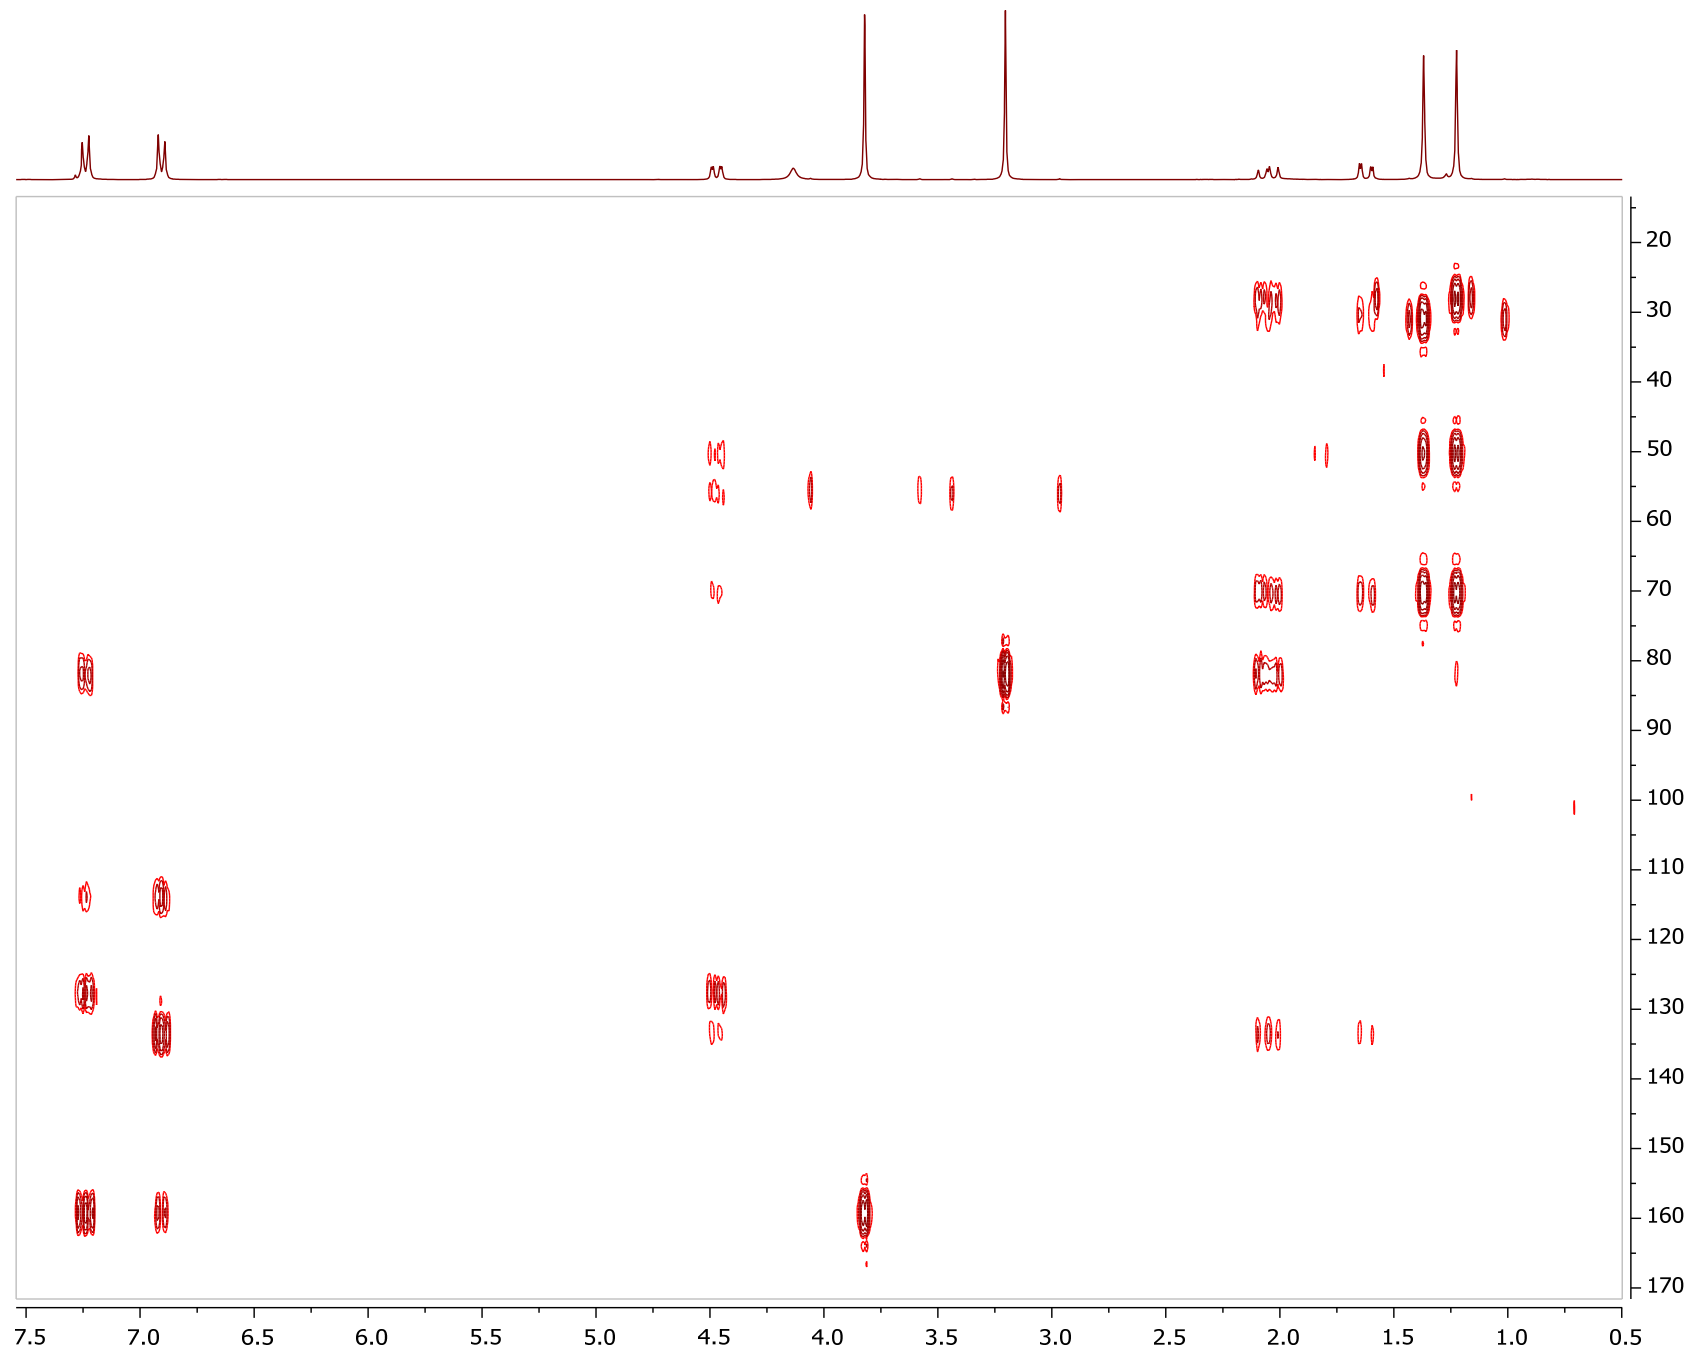

S387

Diethyl 2-((11S\*,11aR\*)-7,8,9,10,11,11a-hexahydrobenzo[4,5]isoxazolo[2,3-a]azepin-11-yl)-2-hydroxymalonate 17

<sup>1</sup>H NMR (300 MHz, 323K, CDCl<sub>3</sub>)

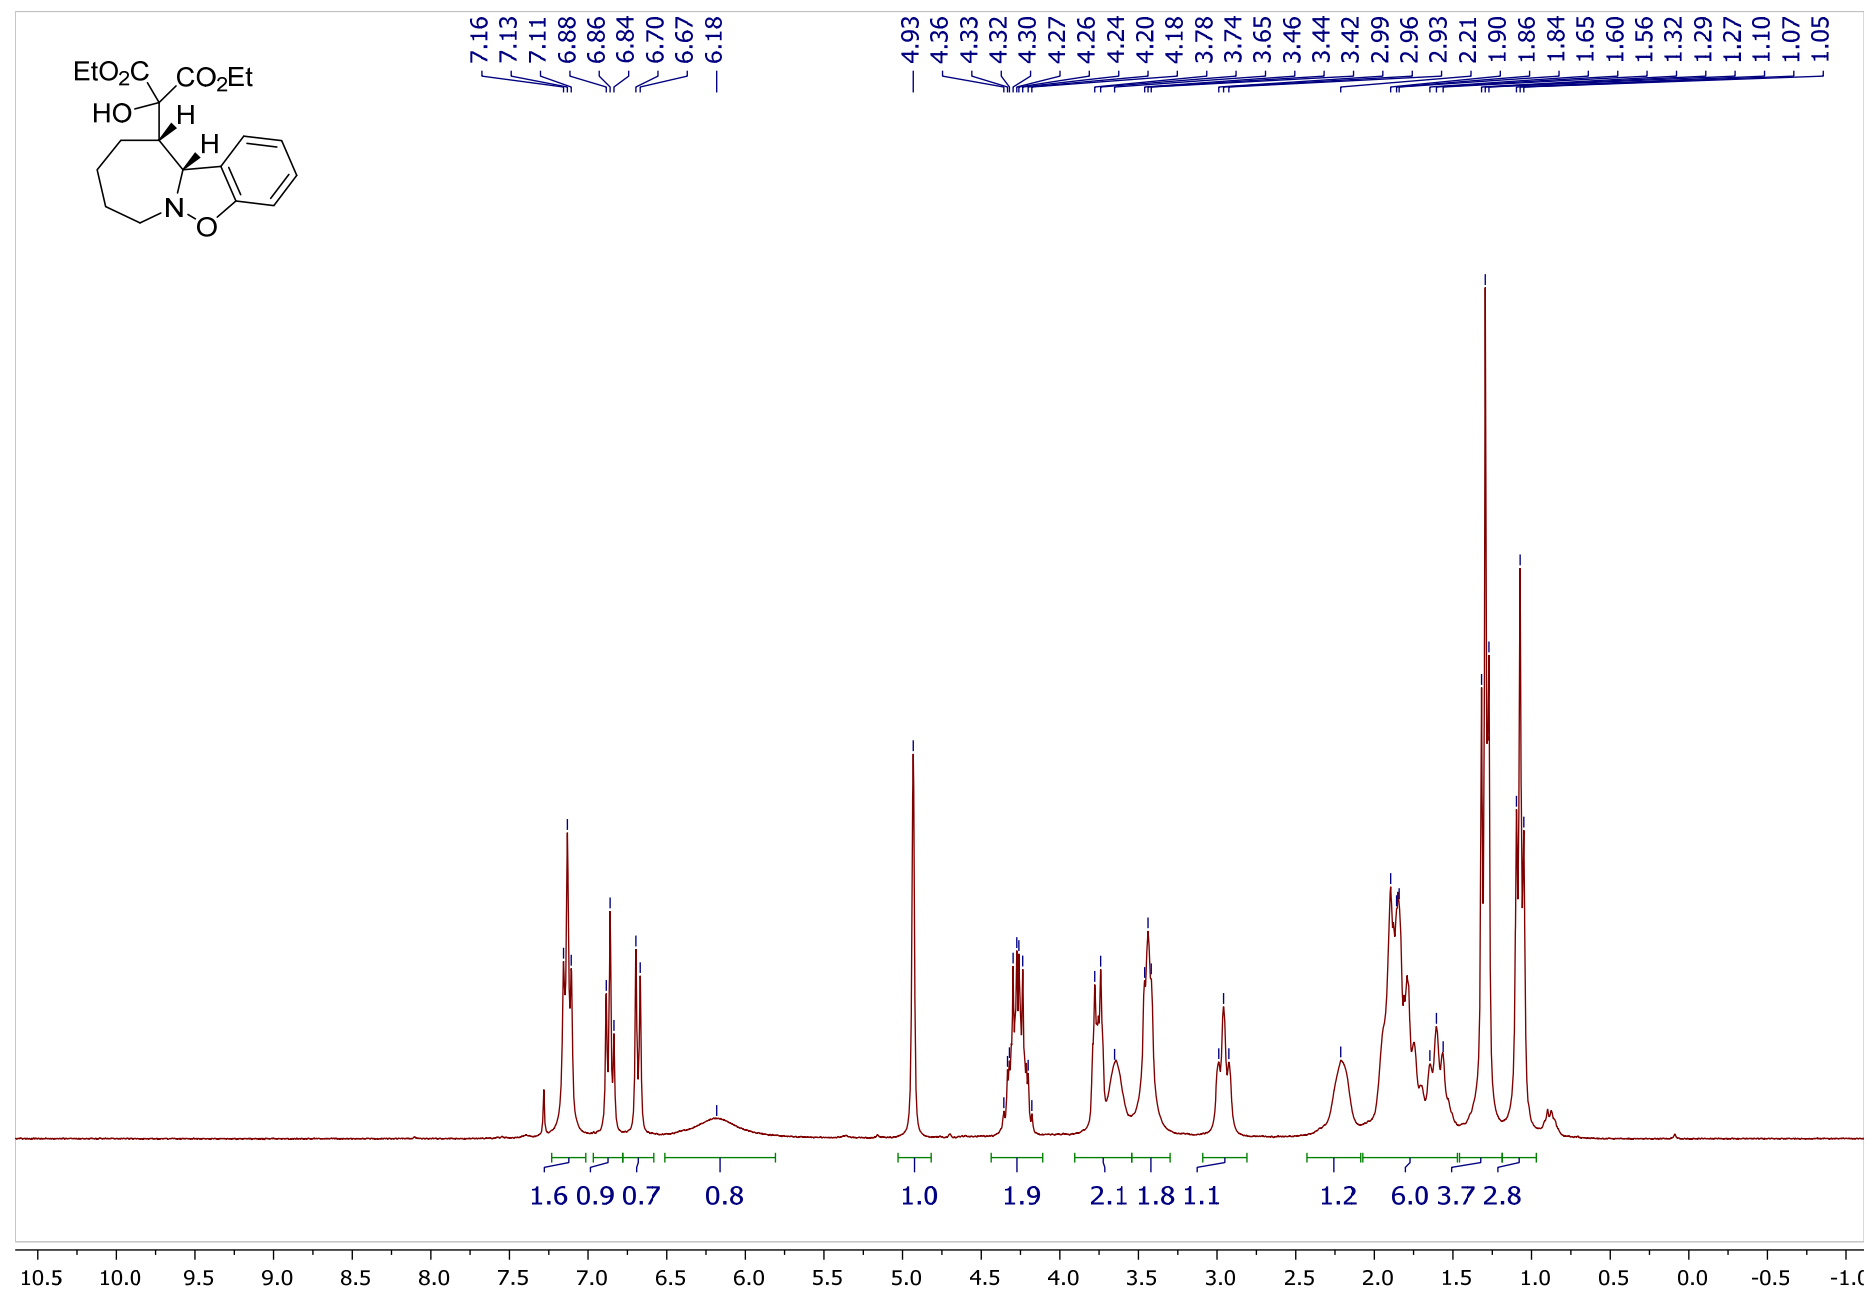

$^{13}\text{C}$  NMR (75 MHz, 323K,  $\text{CDCl}_3$ )

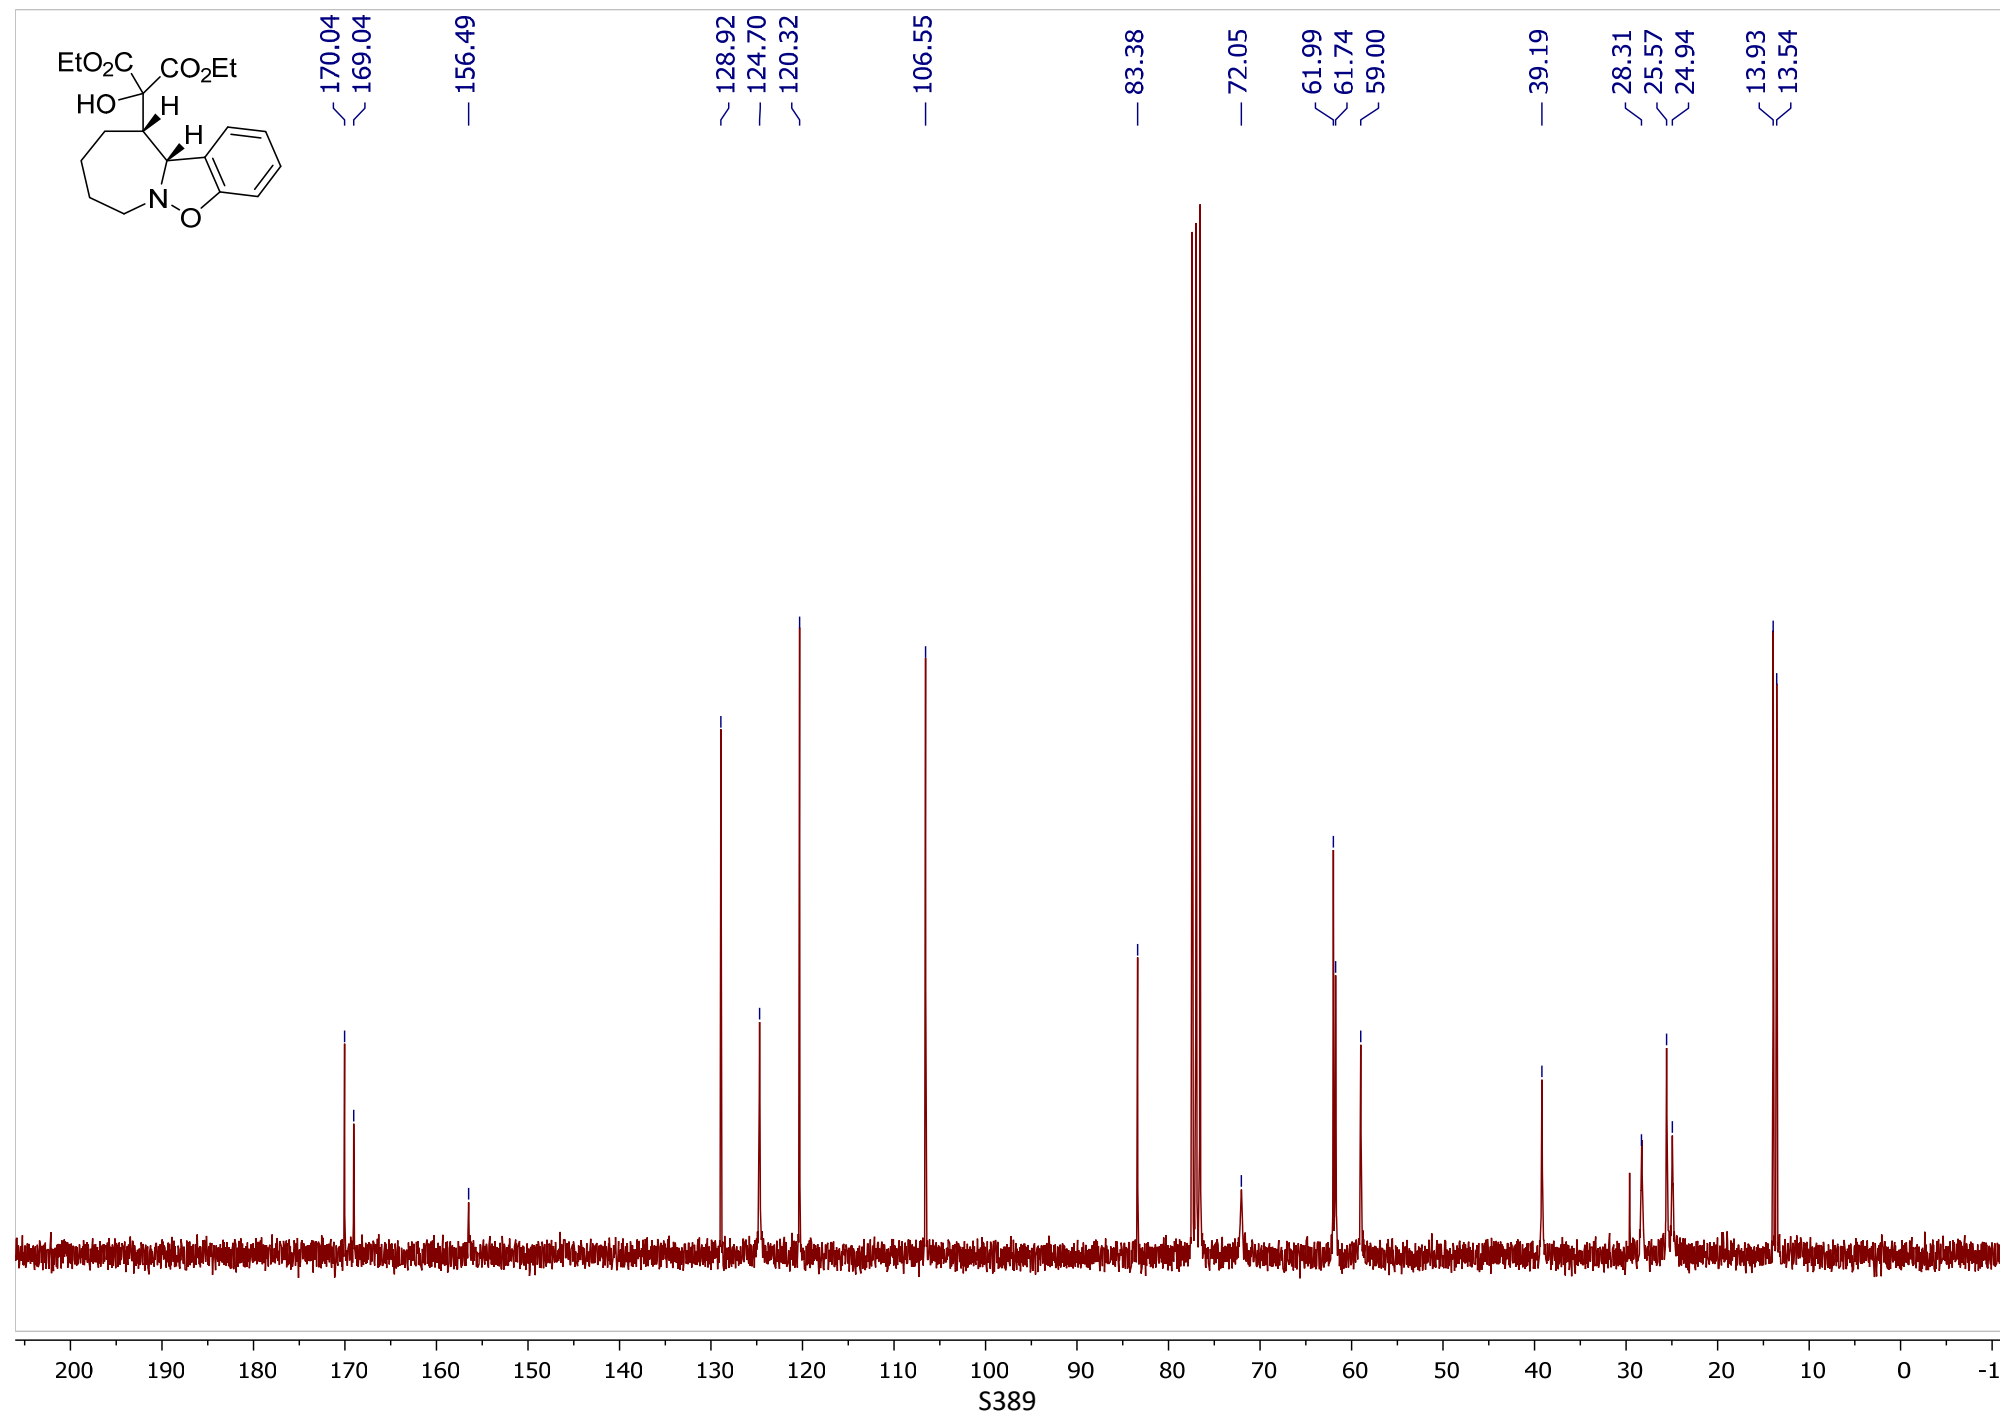

$^{13}\text{C}$  DEPT 135 (75 MHz, 323K,  $\text{CDCl}_3$ )

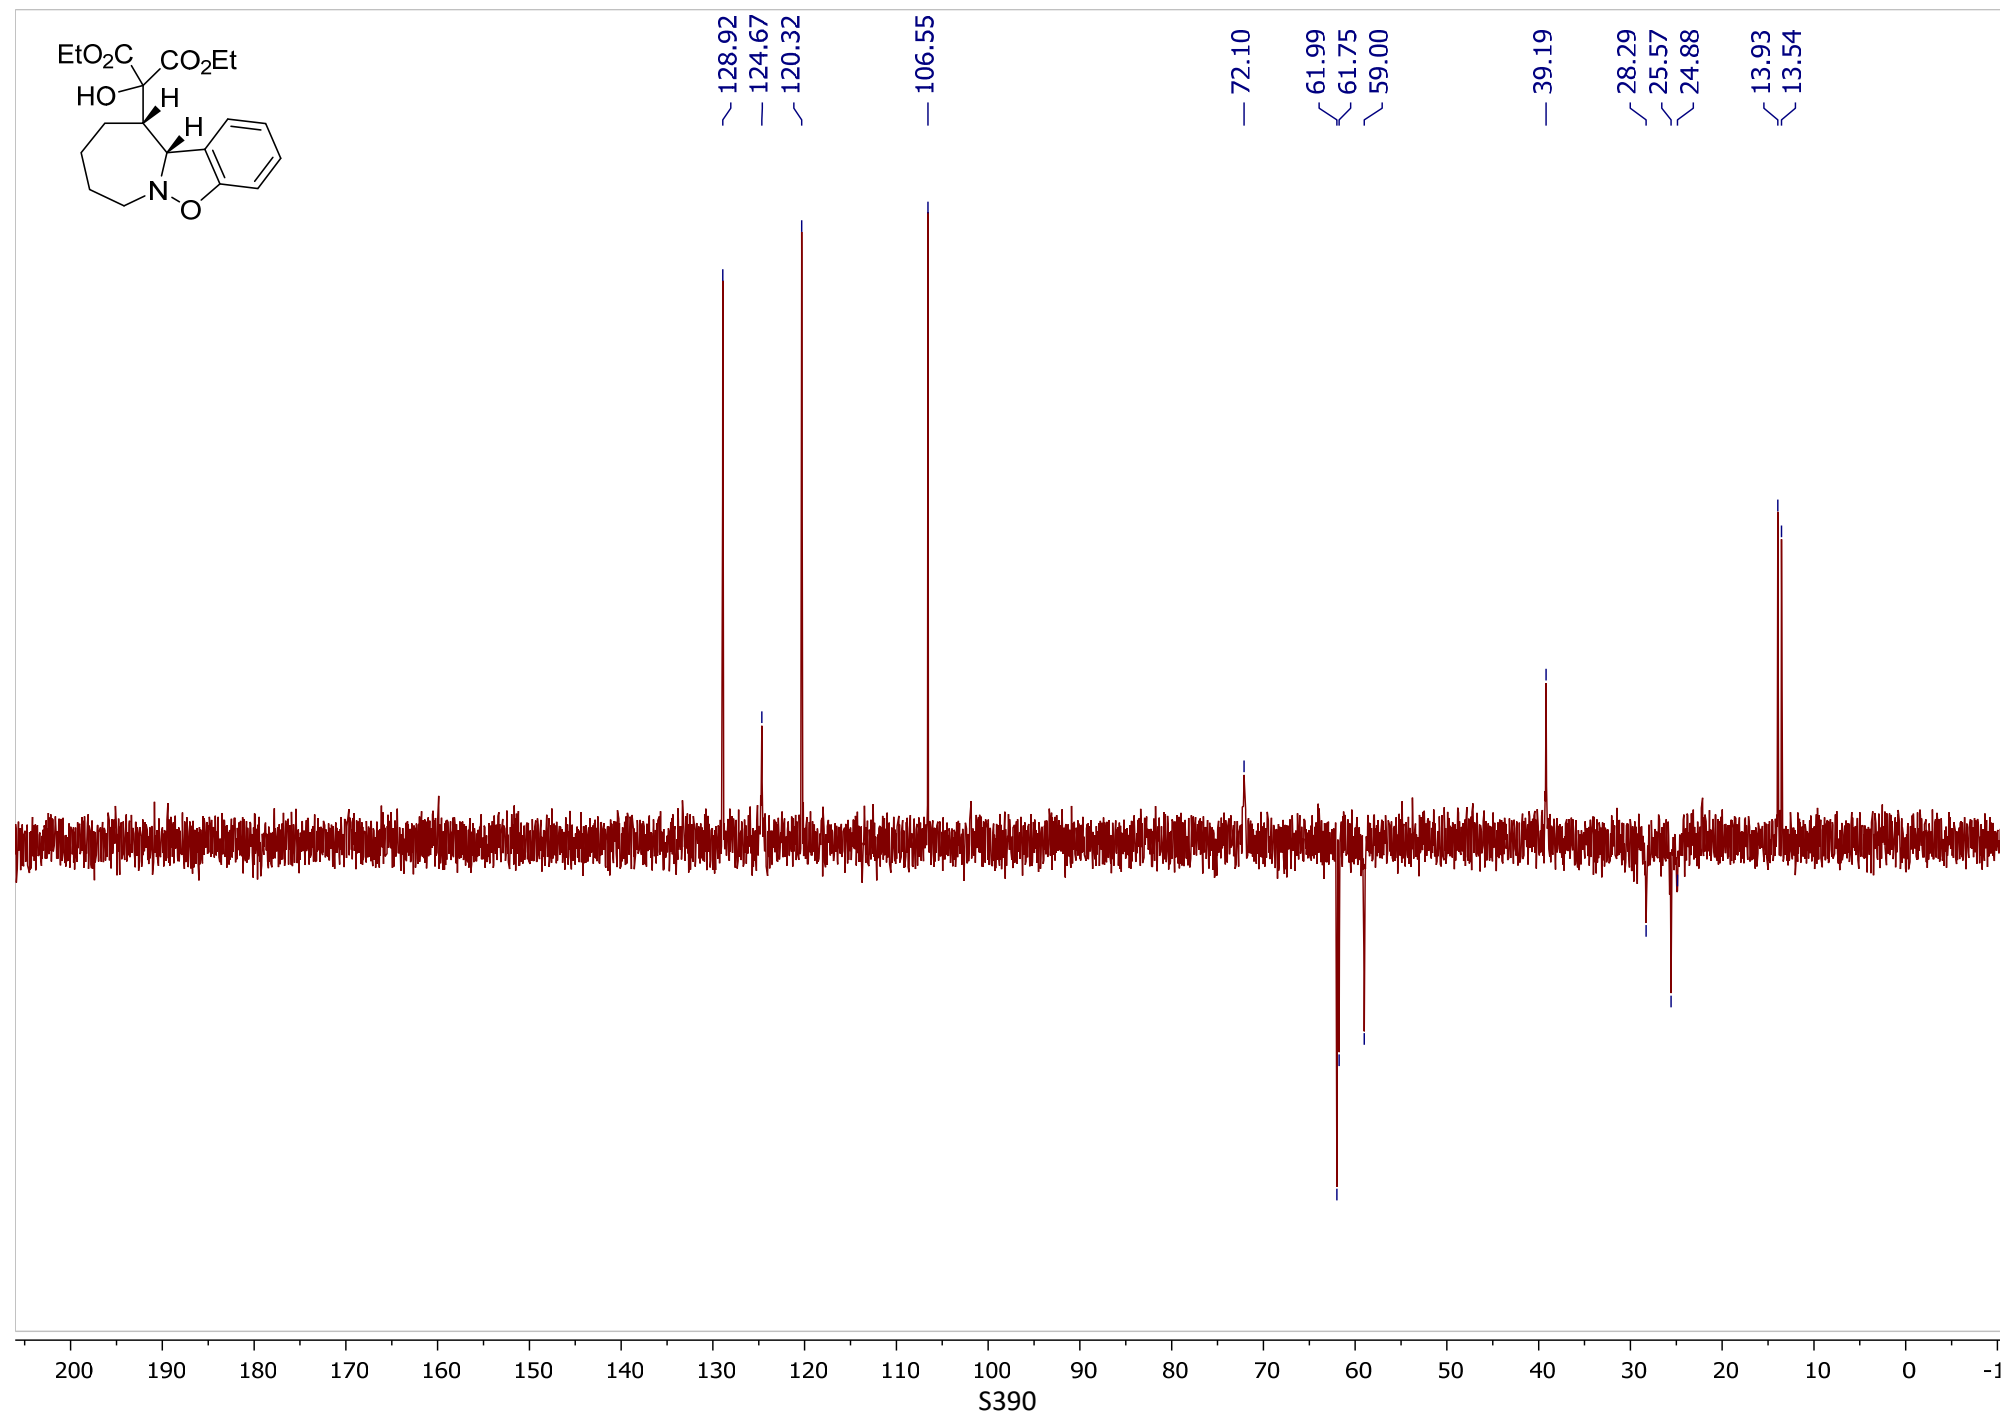

$^1\text{H}$ - $^1\text{H}$  COSY (323K)

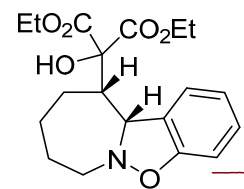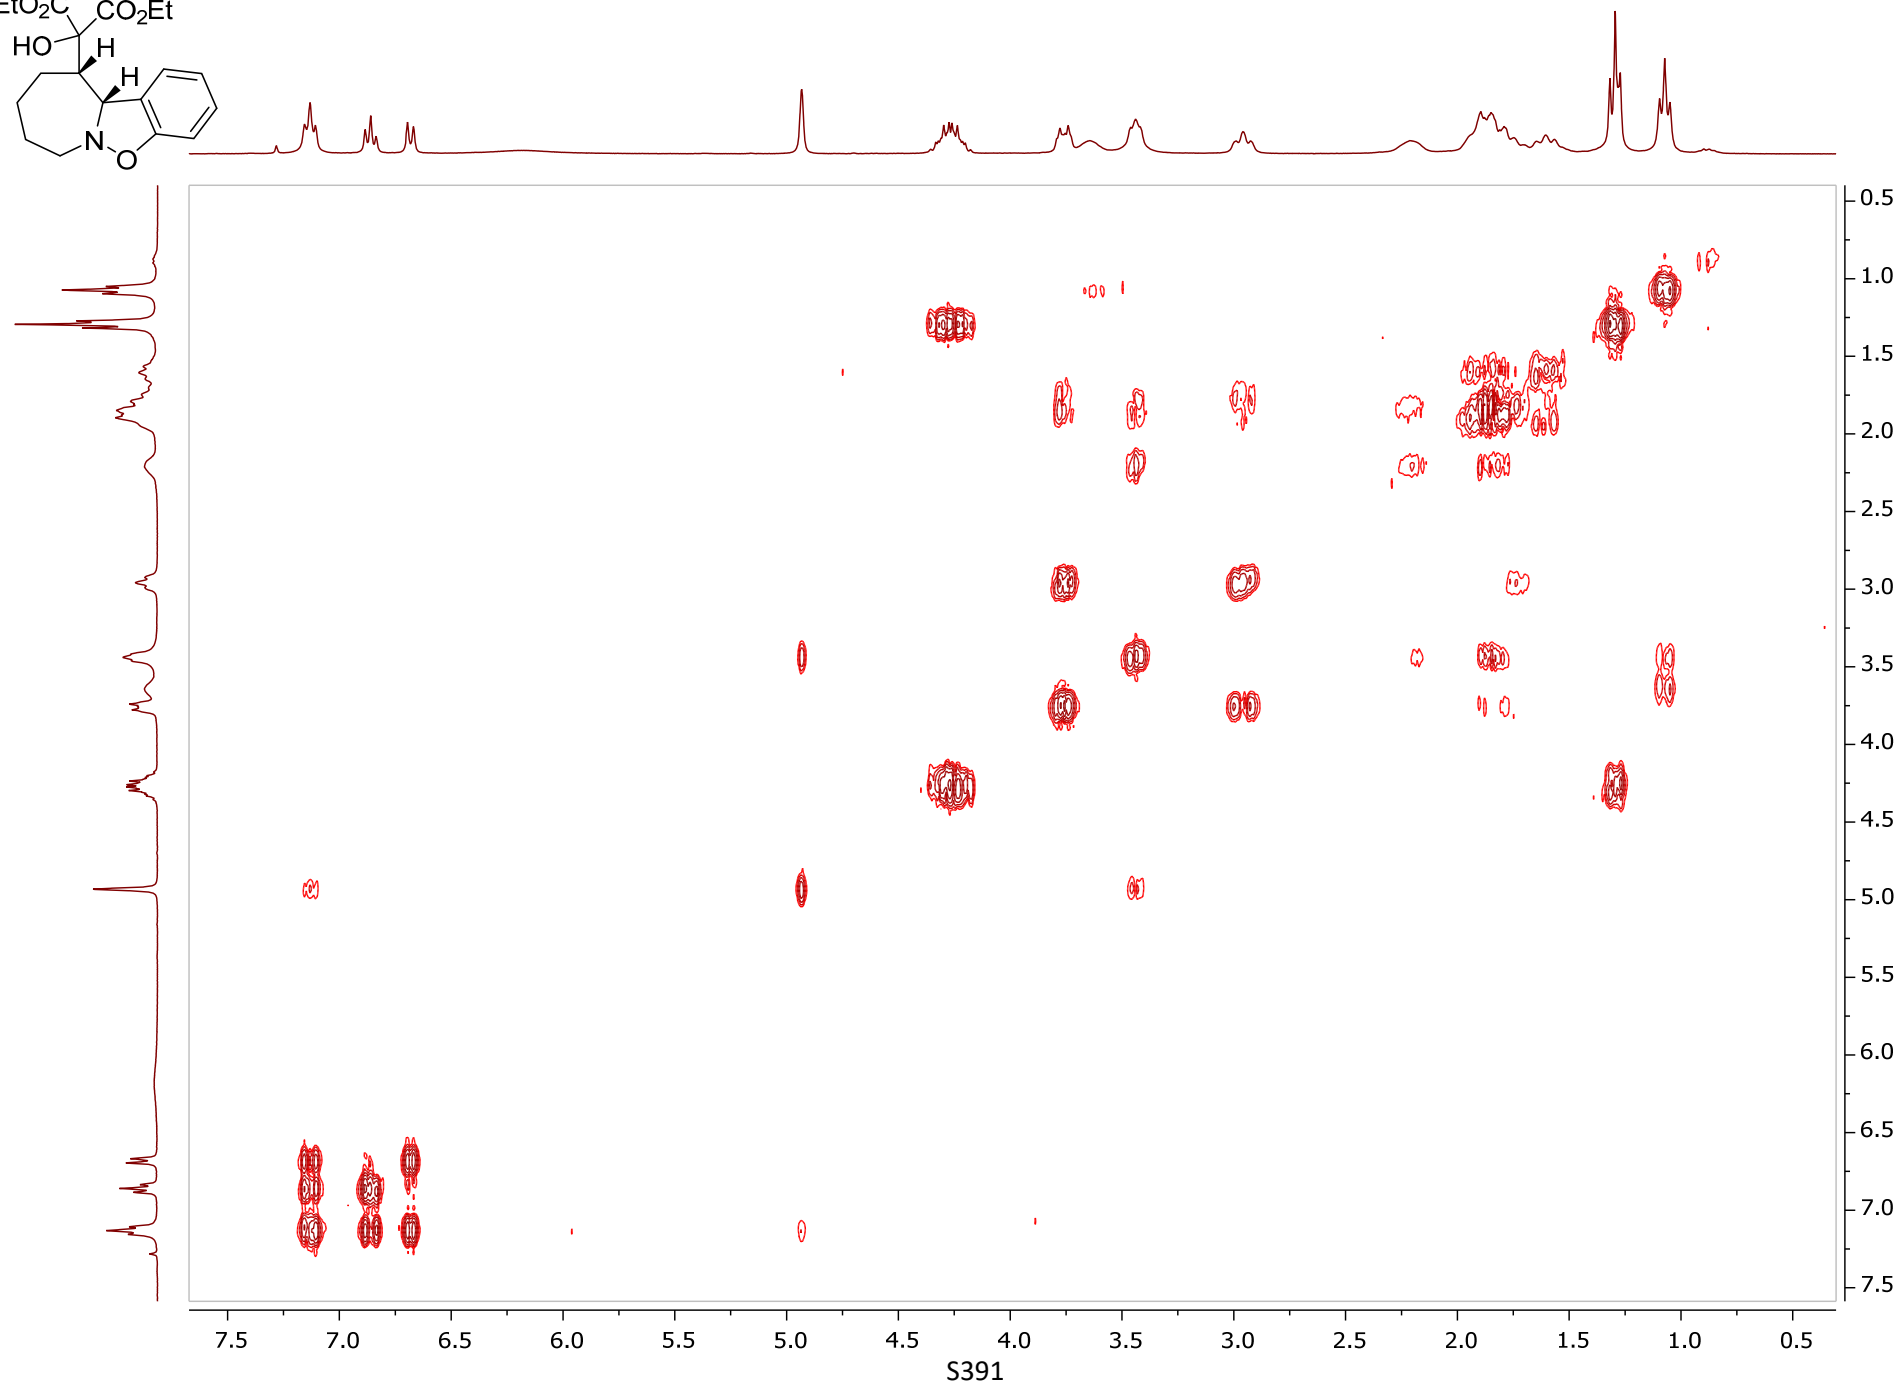

$^1\text{H}$ - $^{13}\text{C}$  HSQC (323K)

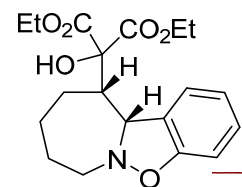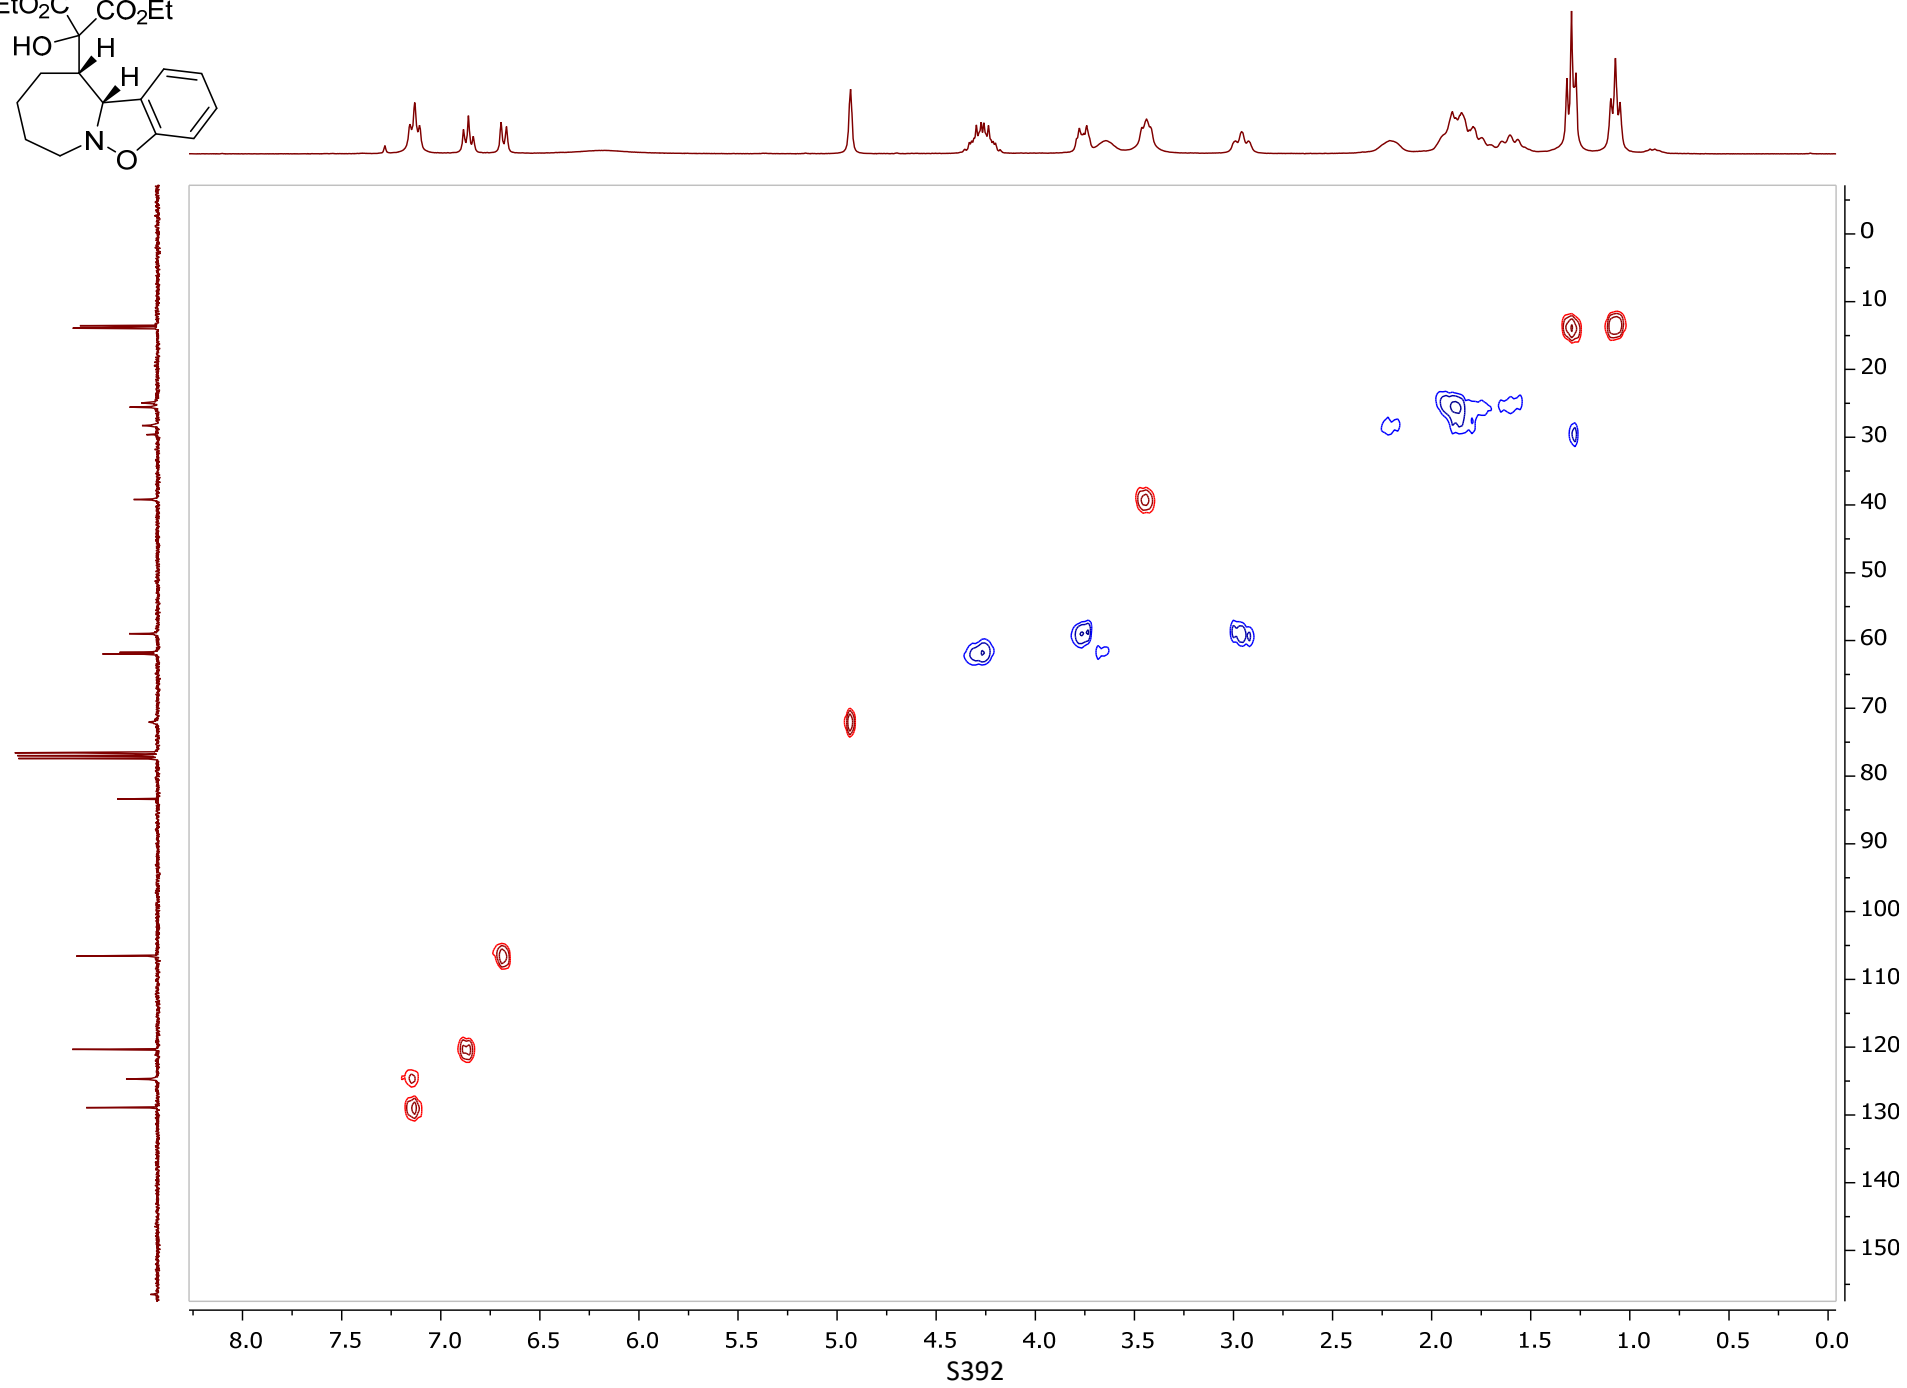



$^1\text{H}$ - $^{13}\text{C}$  HMBC (323K)

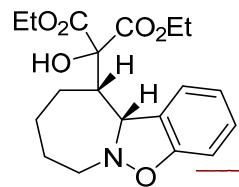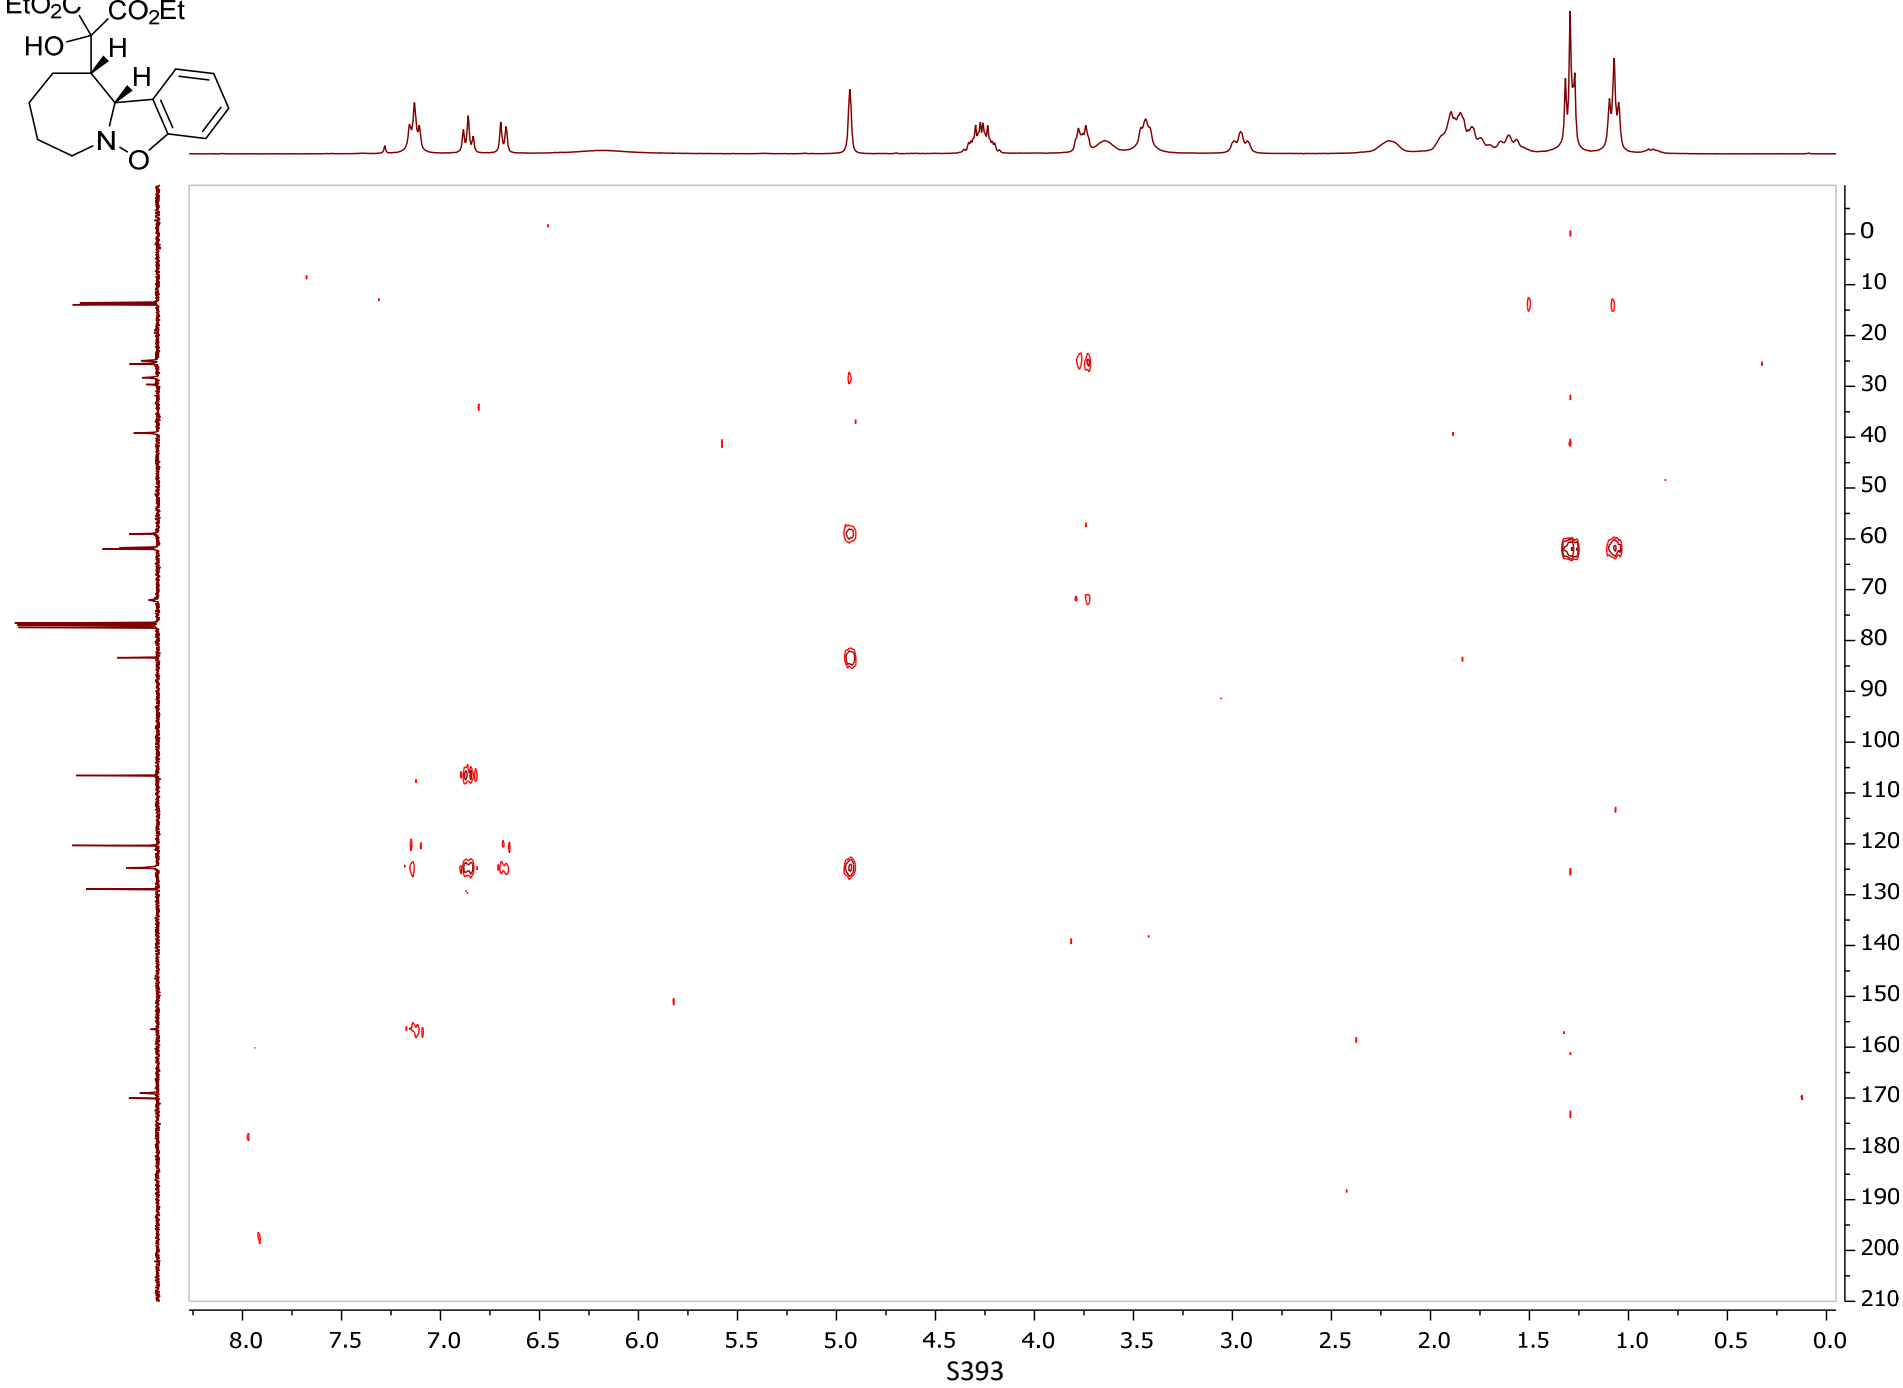

$^1\text{H}$  NMR (300 MHz,  $\text{CDCl}_3$ ) at r.t.

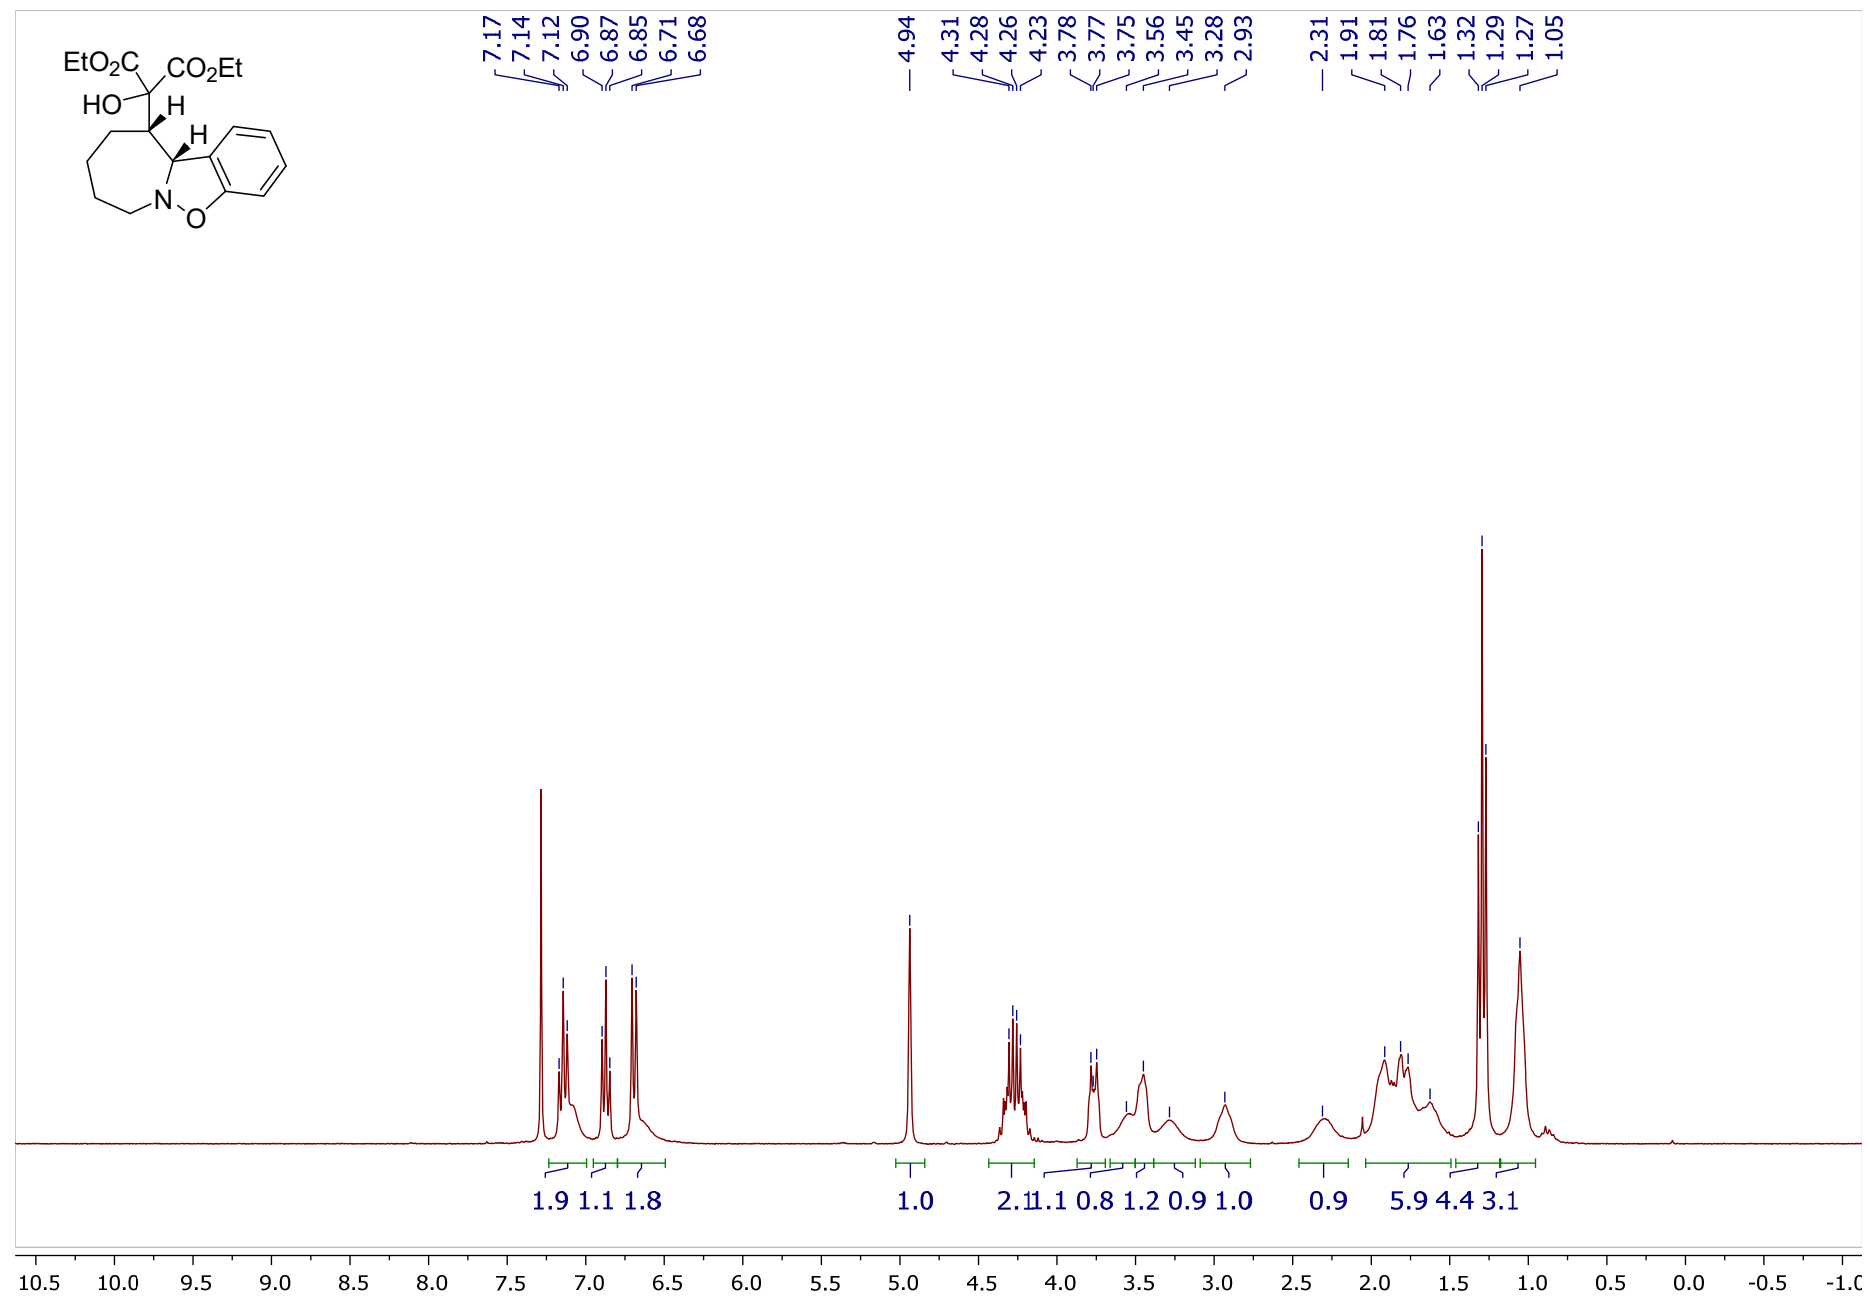

$^{13}\text{C}$  NMR (75 MHz,  $\text{CDCl}_3$ ) at r.t.

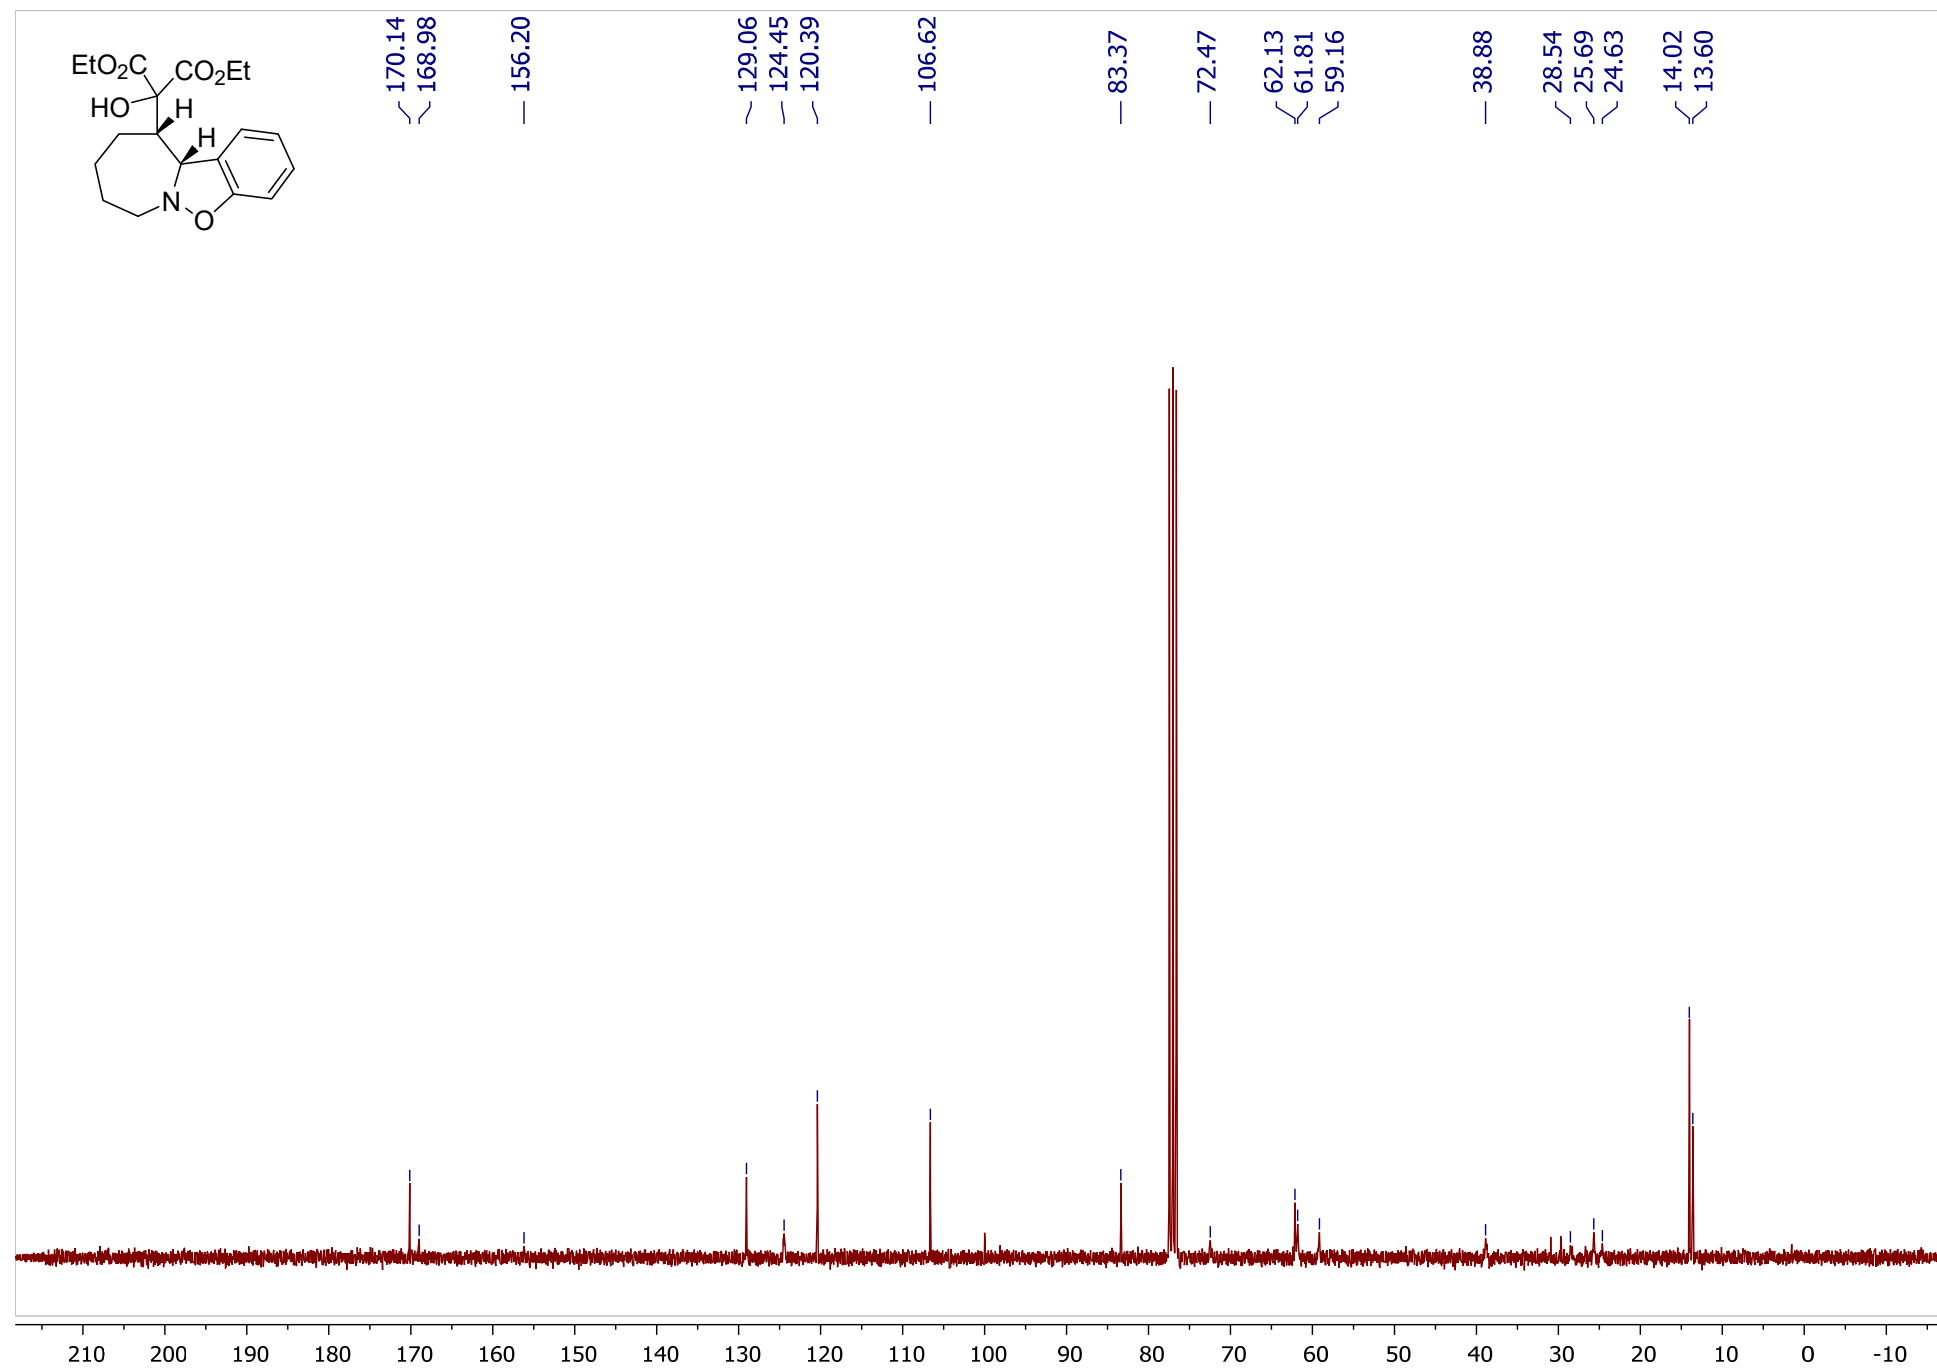

$^{13}\text{C}$  DEPT 135 (75 MHz,  $\text{CDCl}_3$ ) at r.t.

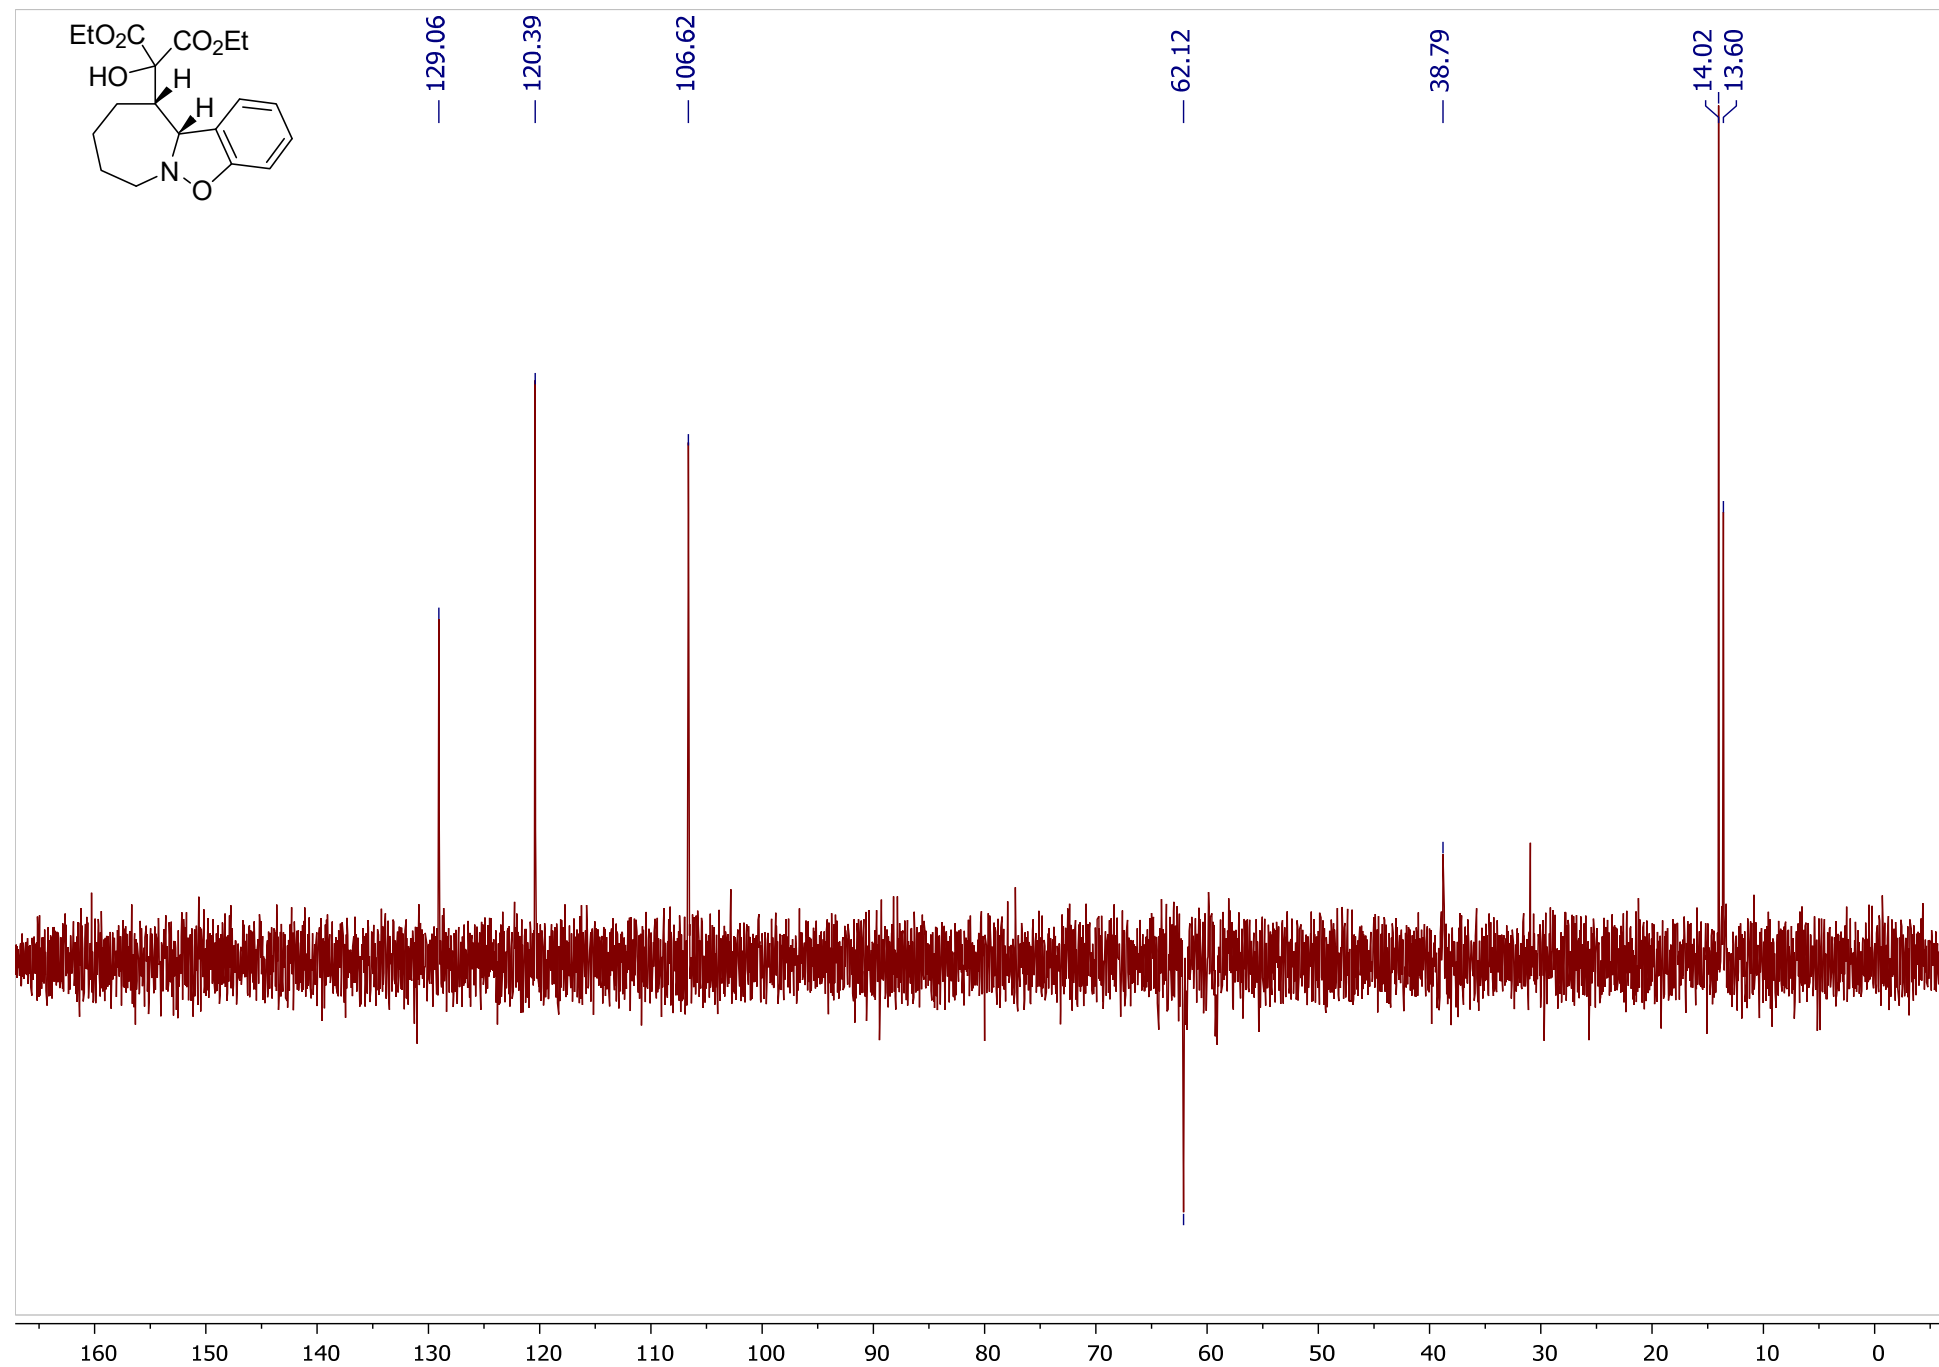

$^1\text{H}$ - $^1\text{H}$  COSY at r.t.

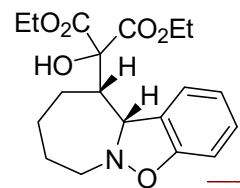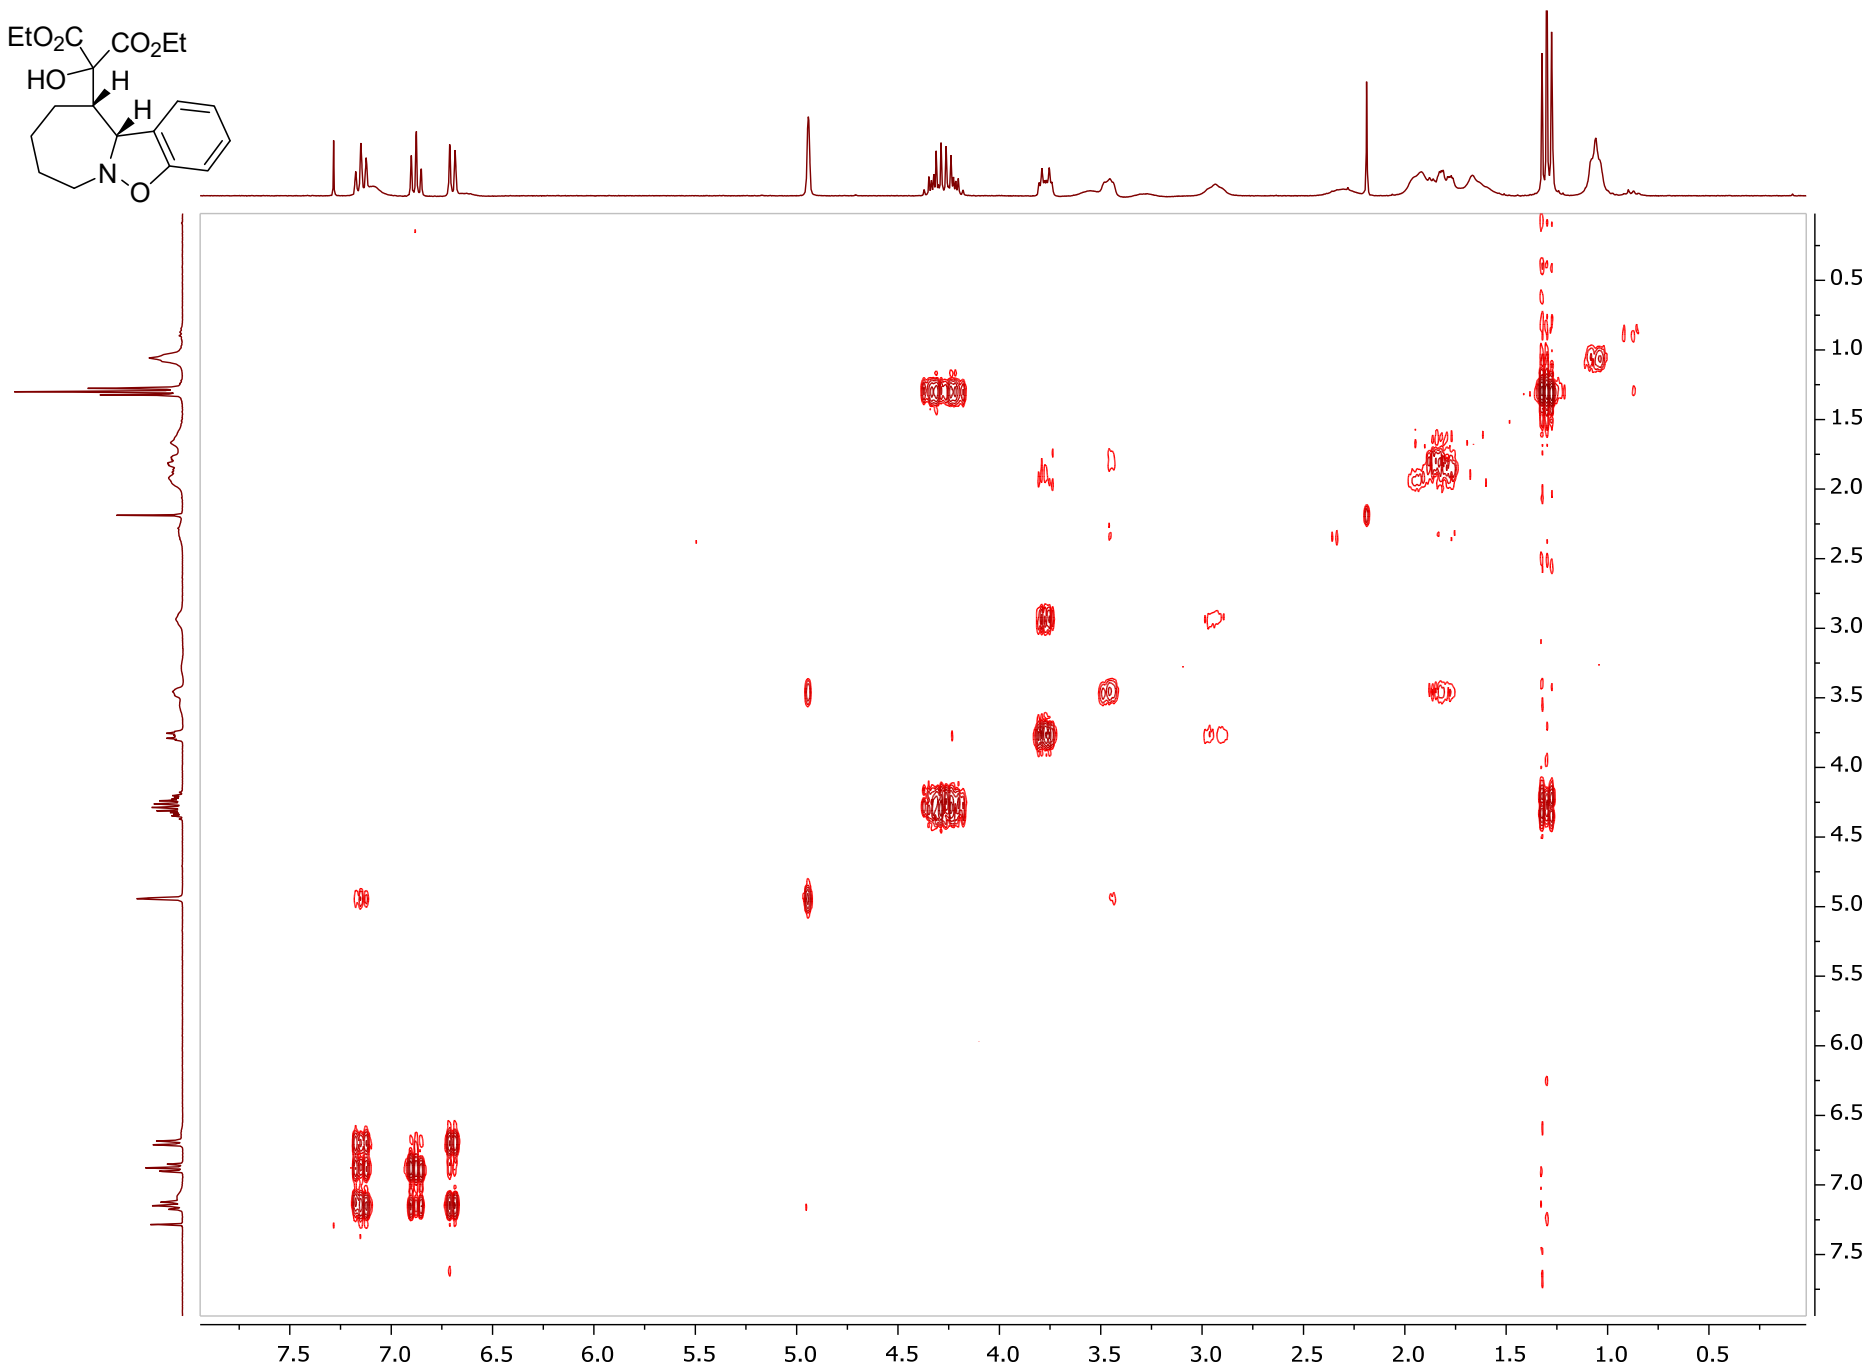

S397

$^1\text{H}$ - $^{13}\text{C}$  HSQC at r.t.

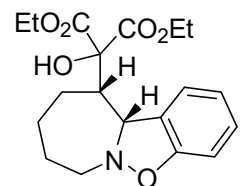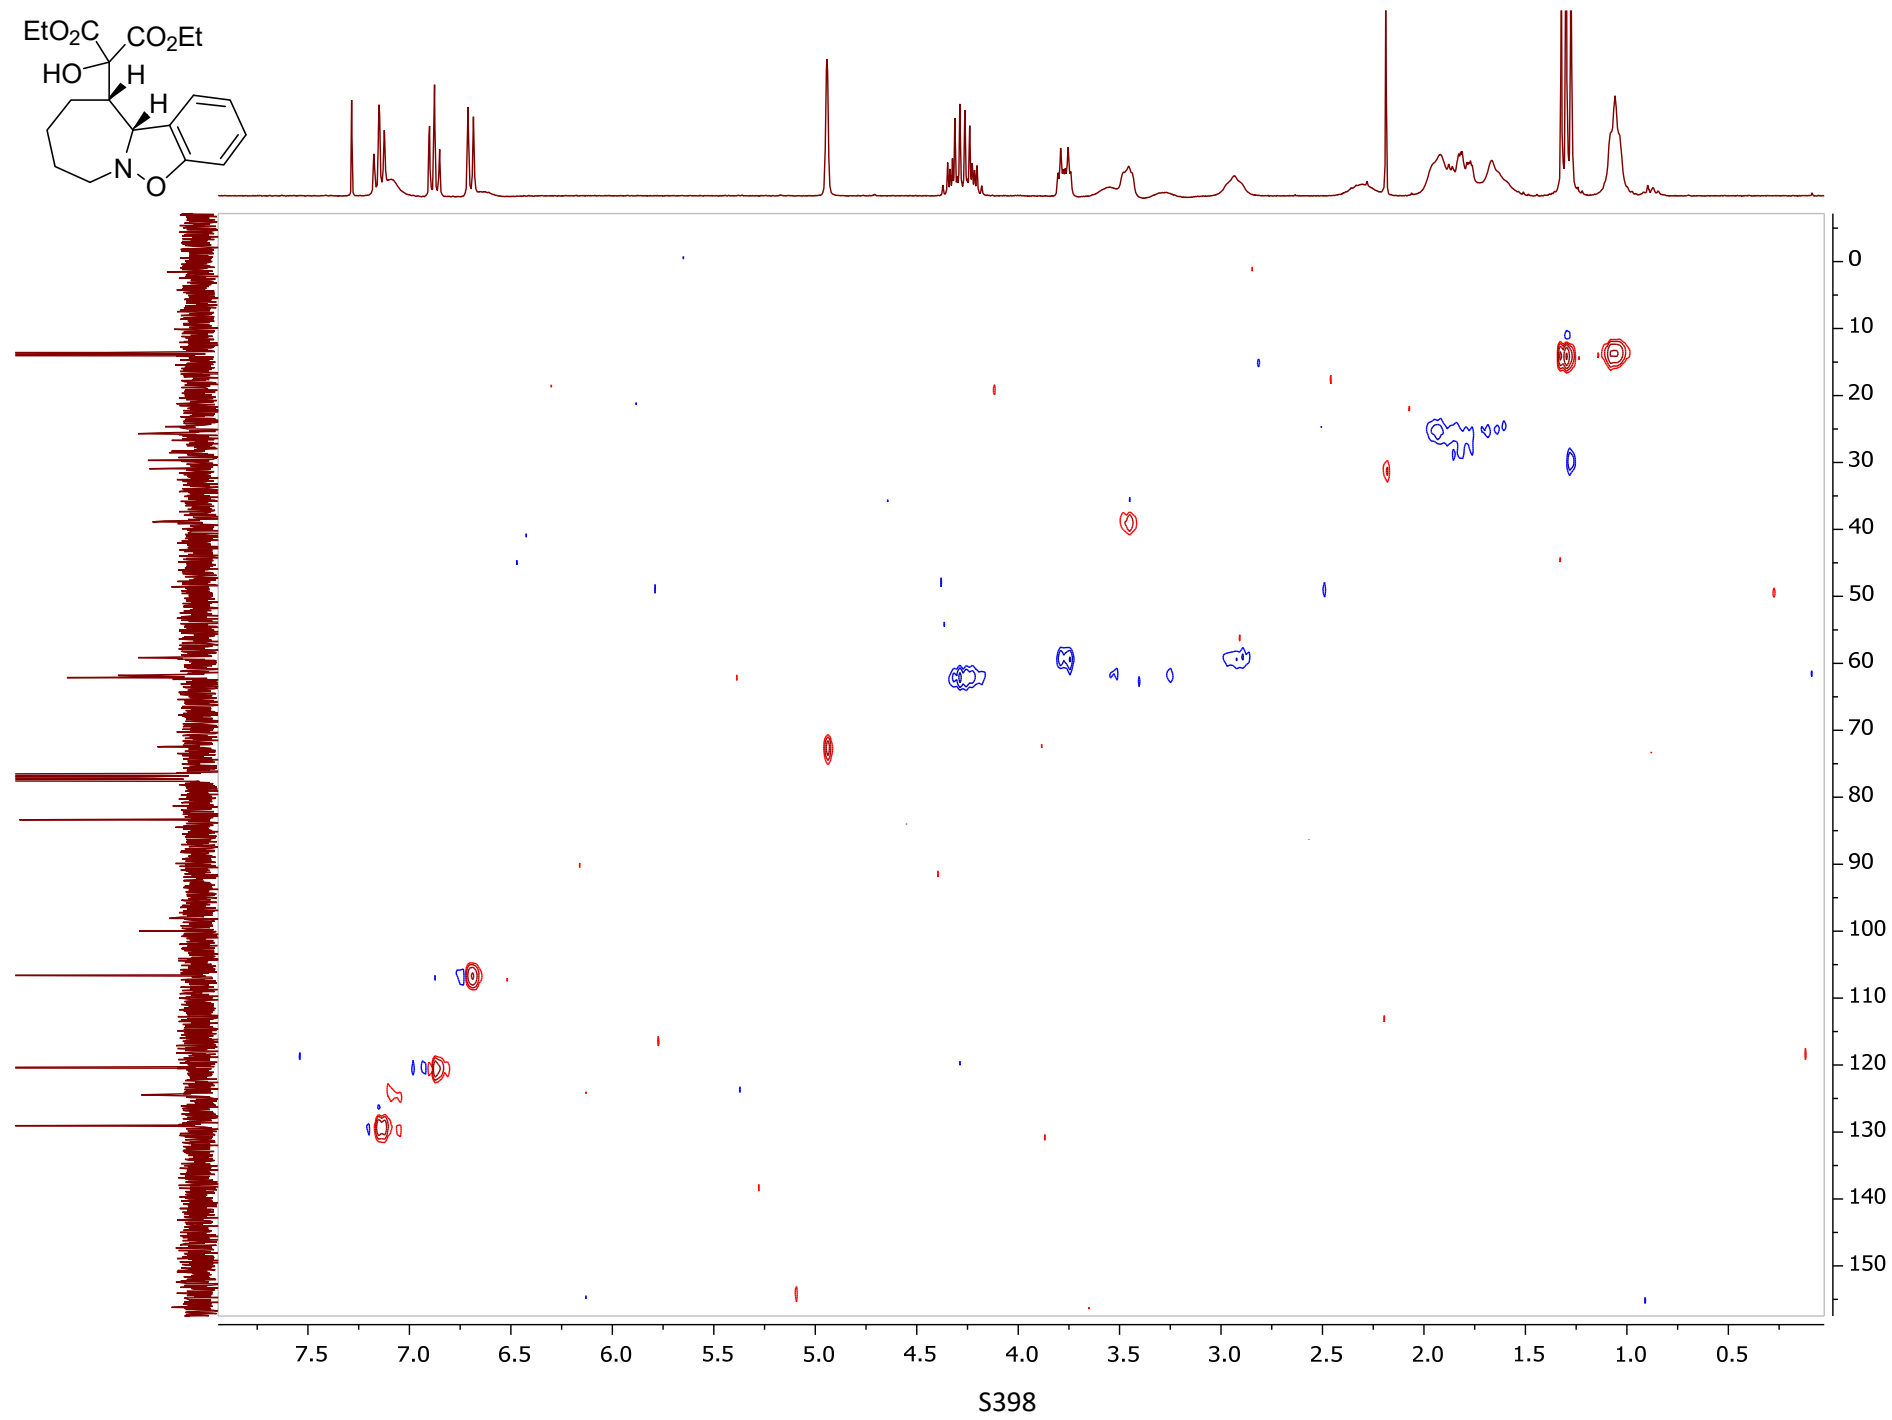

S398

$^1\text{H}$ - $^{13}\text{C}$  HMBC at r.t.

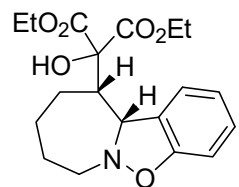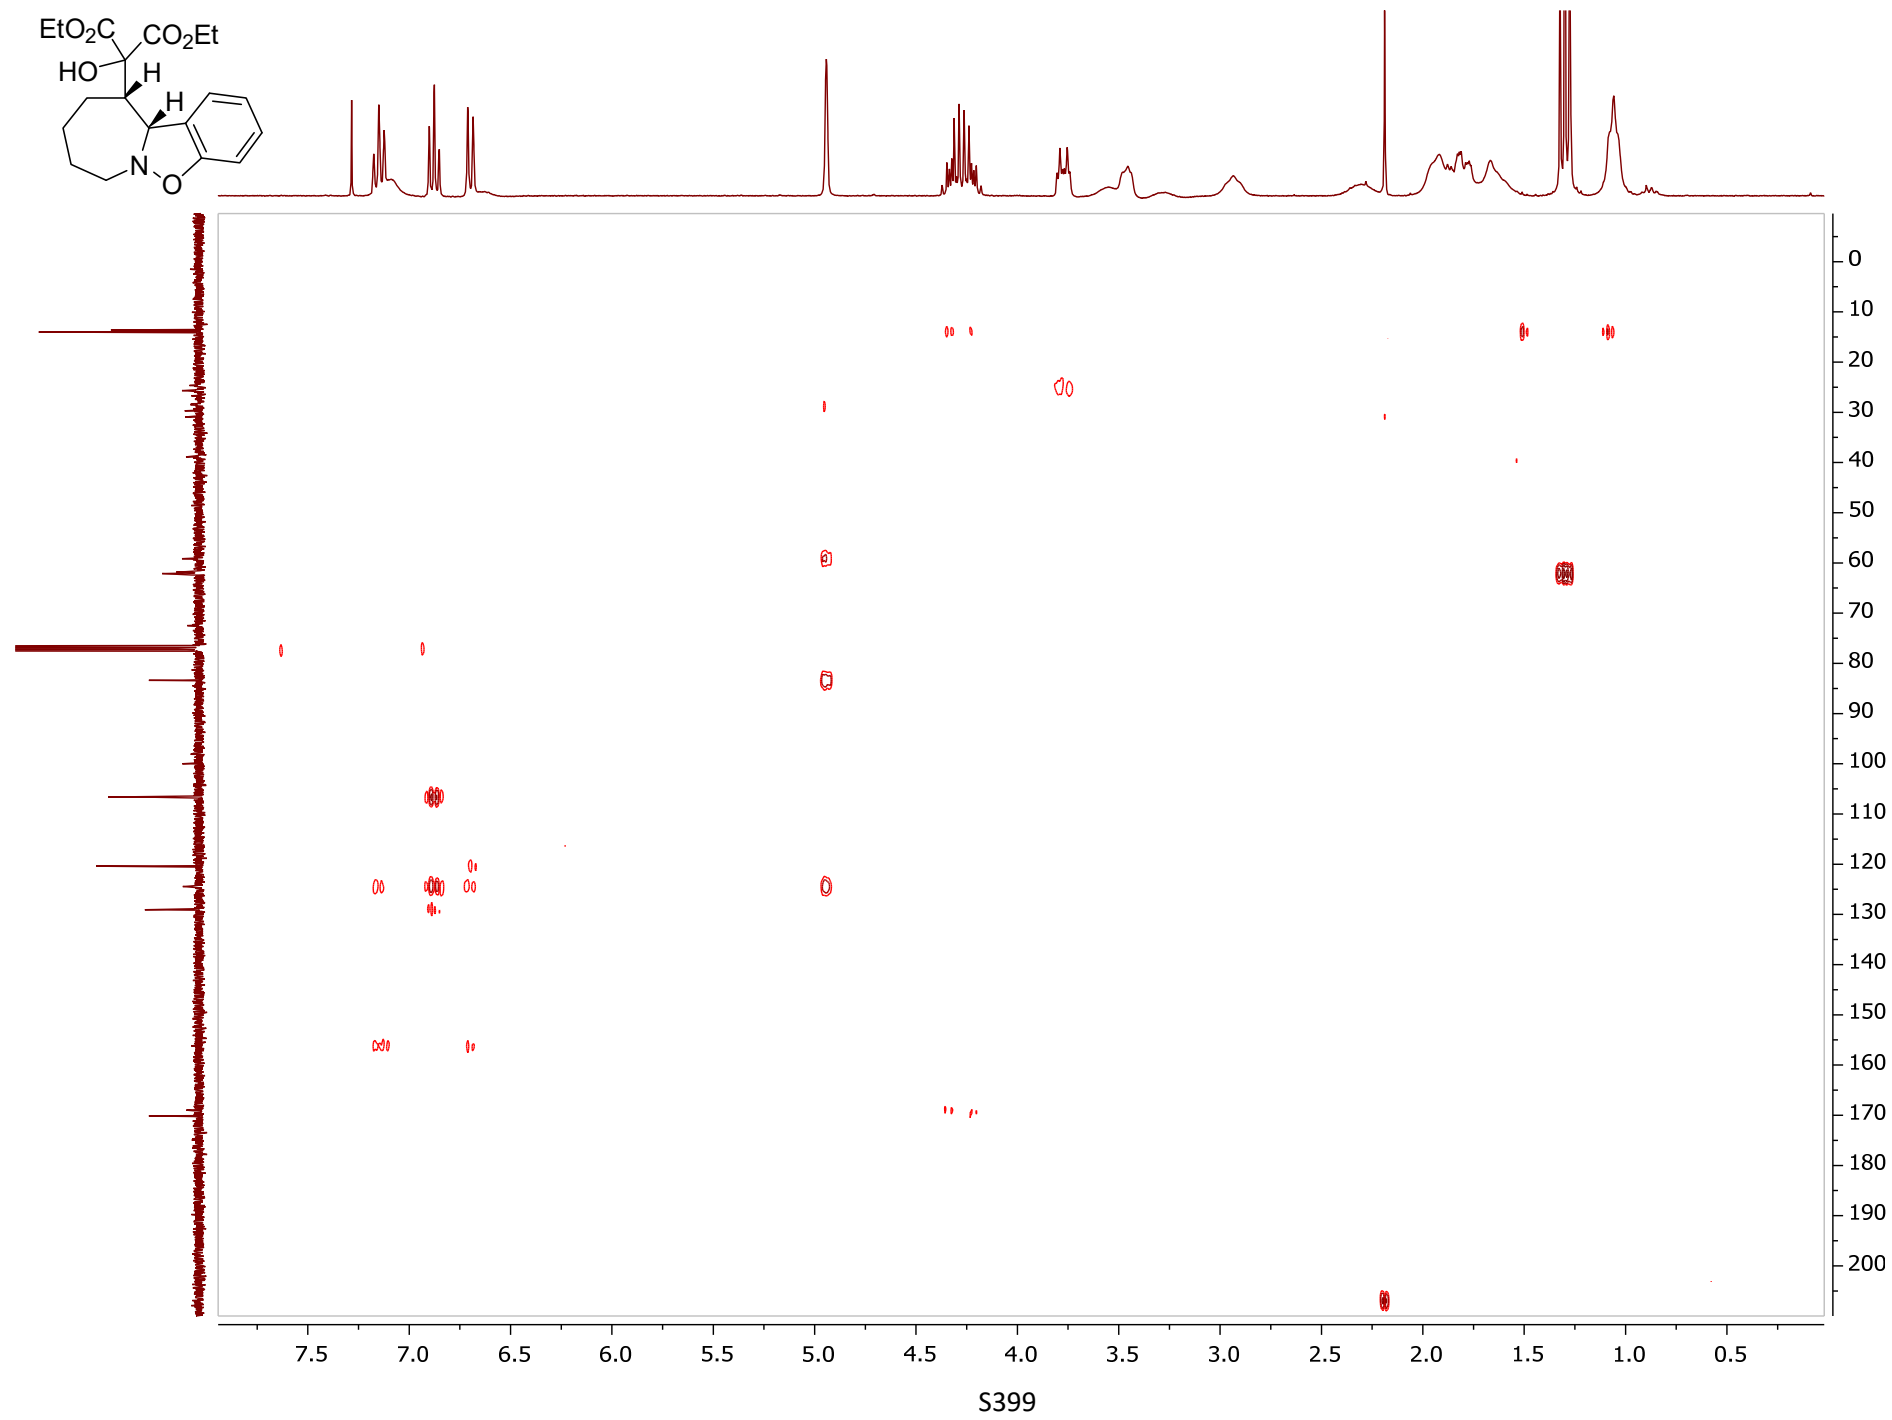

$^1\text{H}$ - $^1\text{H}$  NOESY at r.t.

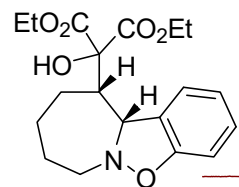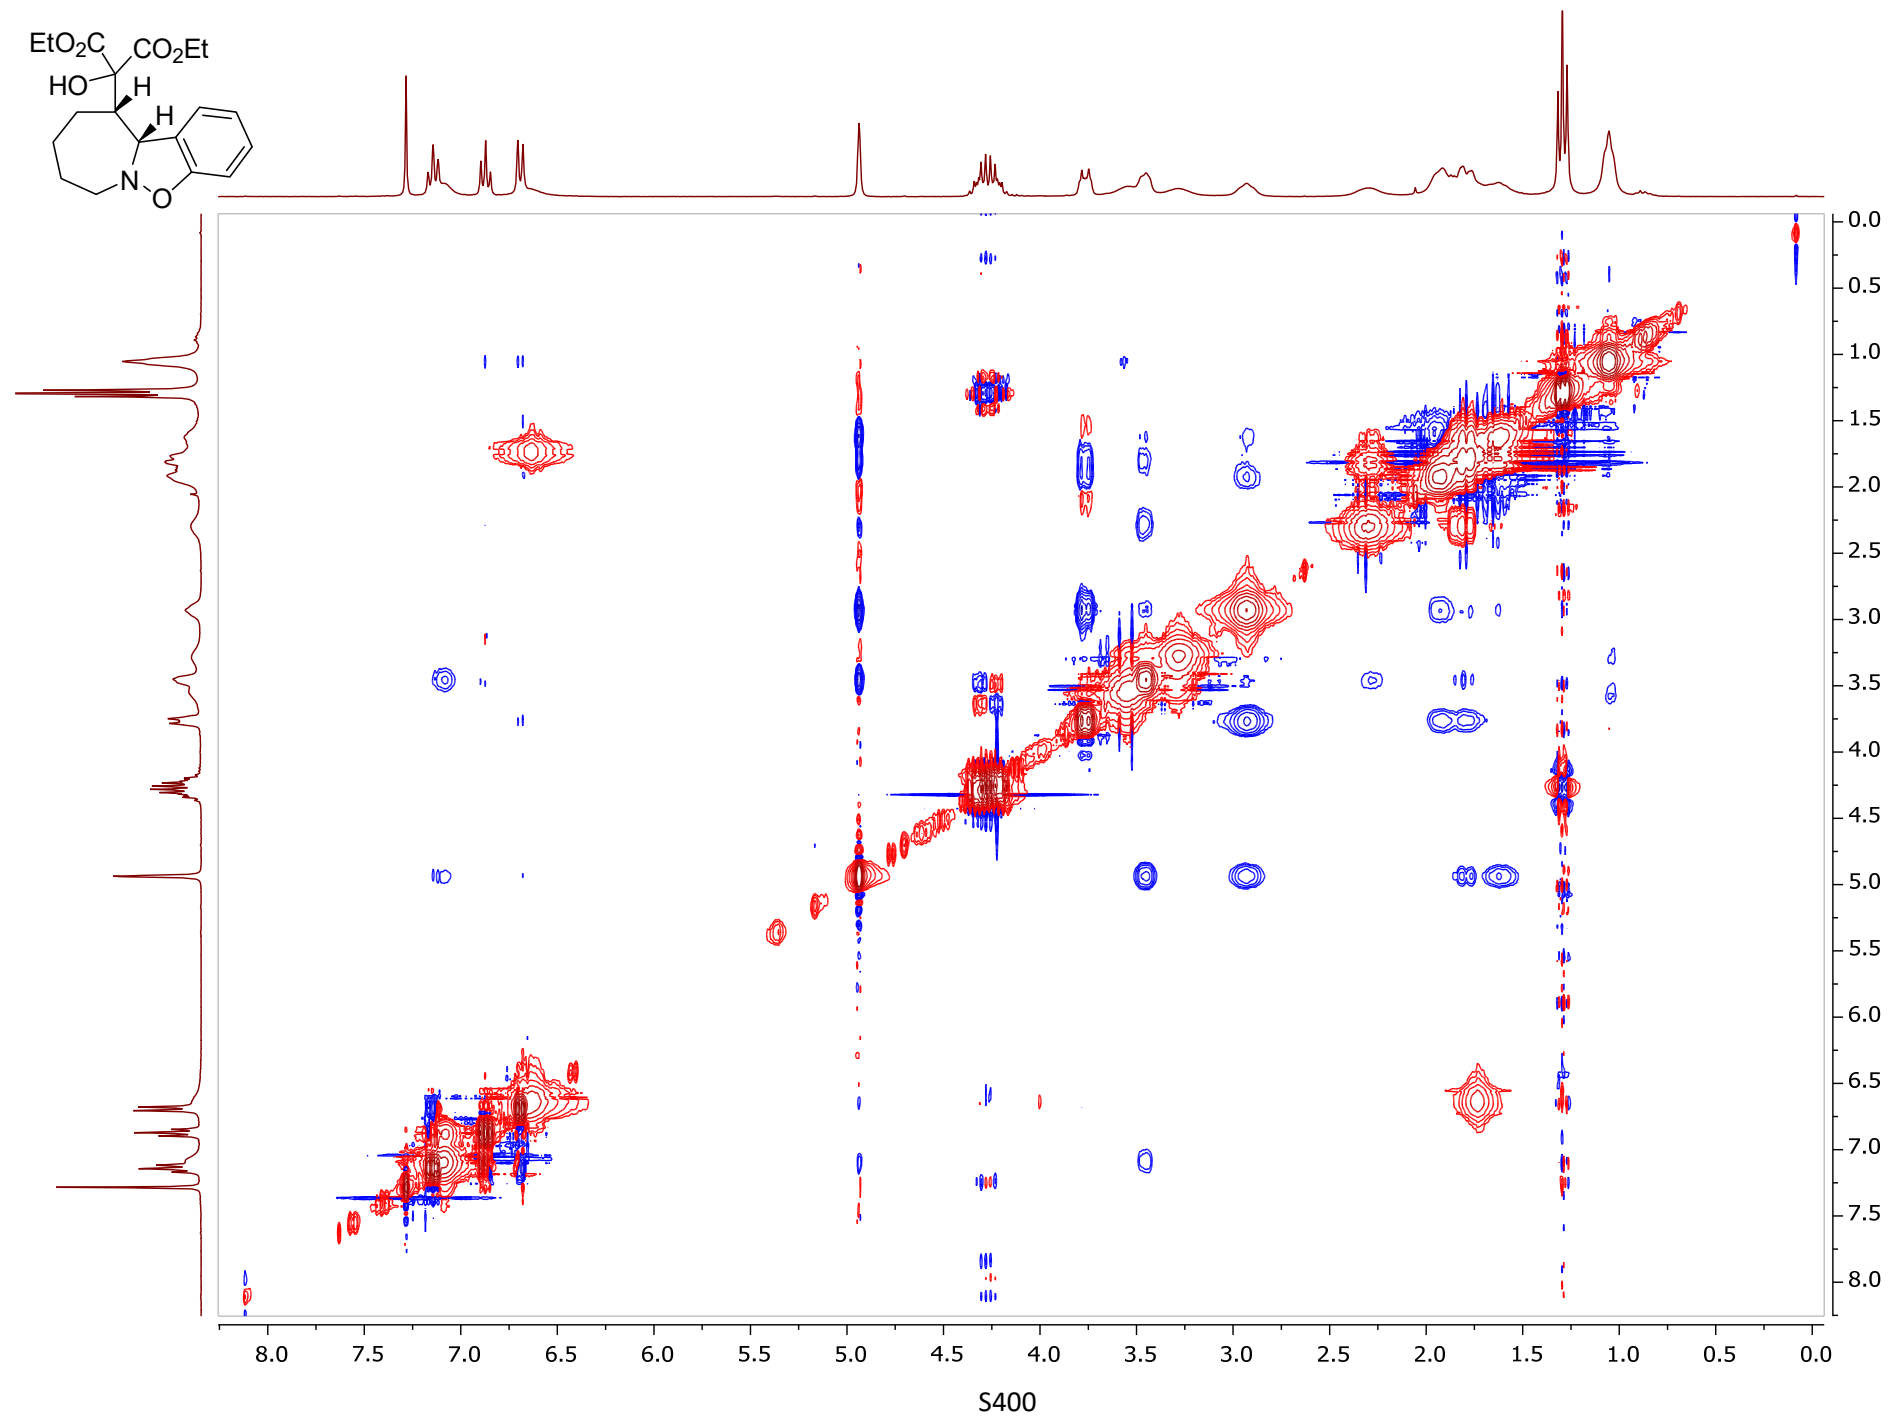

Supplement: d3ob00235g1.pdf [file d3ob00235g1.pdf]
